# Supplementary material for: A unique chromatin profile defines adaptive genomic regions in a fungal plant pathogen
Source: eLife journal article supplement (doi:10.7554/elife.62208), 2020-12-18
Supplement: supp [file elife-62208-supp-v1.zip]

Archive with 27 entries (27 files):
- elife_poa_e62208_Transparent_Reporting_File.docx
- elife_poa_e62208_Supplementary_file_1.xlsx
- elife_poa_e62208_Figure_1_figure_supplement_1.pdf
- elife_poa_e62208_Figure_1_figure_supplement_2.pdf
- elife_poa_e62208_Figure_1_figure_supplement_3.pdf
- elife_poa_e62208_Figure_2_figure_supplement_1.pdf
- elife_poa_e62208_Figure_2_figure_supplement_2.pdf
- elife_poa_e62208_Figure_2_figure_supplement_3.pdf
- elife_poa_e62208_Figure_3_figure_supplement_1.pdf
- elife_poa_e62208_Figure_4_figure_supplement_1.pdf
- elife_poa_e62208_Figure_5_figure_supplement_1.pdf
- elife_poa_e62208_Figure_6_figure_supplement_1.pdf
- elife_poa_e62208_Figure_6_figure_supplement_2.pdf
- elife_poa_e62208_Figure_6_figure_supplement_3.pdf
- elife_poa_e62208_Figure_6_figure_supplement_4.pdf
- elife_poa_e62208_Figure_6_figure_supplement_5.pdf
- elife_poa_e62208_Figure_7_figure_supplement_1.pdf
- elife_poa_e62208_Figure_7_figure_supplement_2.pdf
- elife_poa_e62208_Figure_7_figure_supplement_3.pdf
- elife_poa_e62208_Figure_1_source_data_1.txt
- elife_poa_e62208_Figure_2_source_data_1.txt
- elife_poa_e62208_Figure_4_source_data_1.txt
- elife_poa_e62208_Figure_6_source_data_1.txt
- elife_poa_e62208_Figure_6_source_data_2.txt
- elife_poa_e62208_Figure_6_source_data_3.txt
- elife_poa_e62208_Figure_7_source_data_1.txt
- elife_poa_e62208_Figure_7_source_data_2.txt
