# Supplementary material for: A unique chromatin profile defines adaptive genomic regions in a fungal plant pathogen
Source: eLife journal article supplement (doi:10.7554/elife.62208), 2020-12-18
Supplement: supp [file elife-62208-supp-v1.zip › elife_poa_e62208_Figure_1_figure_supplement_2.pdf]

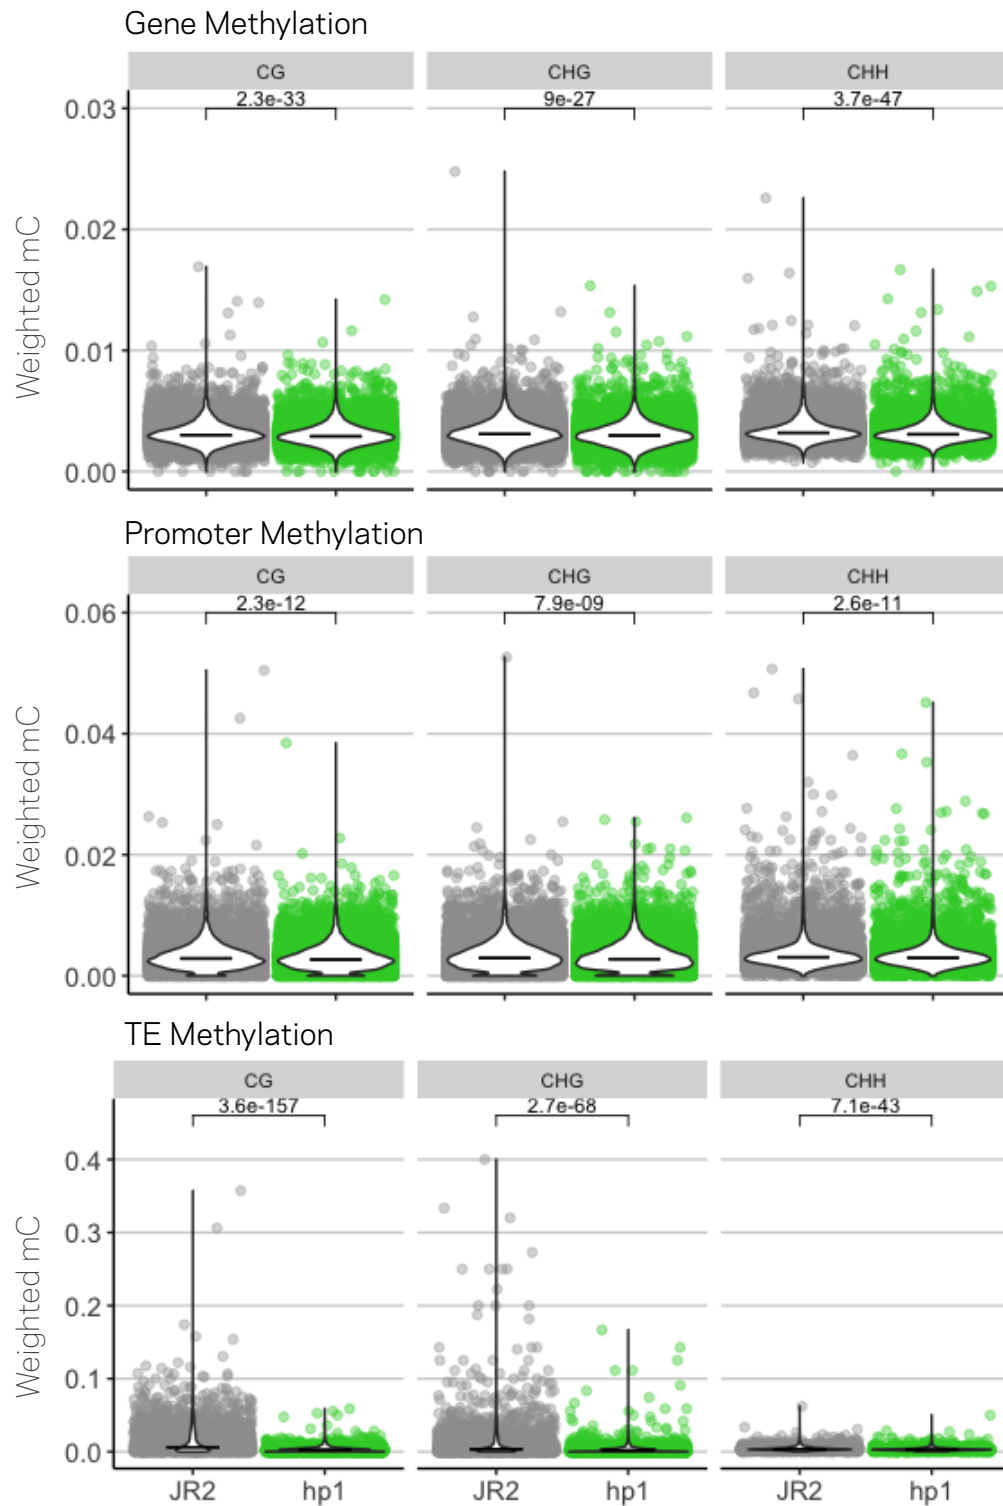

Figure 1- figure supplement 2. Cytosine methylation for functional elements in Wild-type and Dhp1. Cytosine methylation was calculated using weighted methylation (see methods) in the CG, CHG and CHH sequence context in both wild-type (JR2) and Dhp1. DNA methylation was summarized over genes, promoters and TEs as labeled. The individual elements are shown as colored points, along with a violin plot showing the distribution and median as a black line. Methylation levels were determined to be significantly higher in WT, Mann-Whitney U-test with Holm multiple testing correction. Associated p-values are shown.
