# Supplementary material for: A unique chromatin profile defines adaptive genomic regions in a fungal plant pathogen
Source: eLife journal article supplement (doi:10.7554/elife.62208), 2020-12-18
Supplement: supp [file elife-62208-supp-v1.zip › elife_poa_e62208_Figure_1_source_data_1.txt]

Chr	Start	End	wt.Wght_mCGlevel	wt.Fract_mCGlevel	wt.Wght_mCHGlevel	wt.Fract_mCHGlevel	wt.Wght_mCHHlevel	wt.Fract_mCHHlevel	hp.Wght_mCGlevel	hp.Fract_mCGlevel	hp.Wght_mCHGlevel	hp.Fract_mCHGlevel	hp.Wght_mCHHlevel	hp.Fract_mCHHlevel
Chr1	1	10000	0.0066	0.3846	0.0062	0.3539	0.0046	0.2978	0.0058	0.3622	0.0057	0.3402	0.0063	0.3474
Chr1	10001	20000	0.0069	0.4226	0.0062	0.3695	0.0035	0.2627	0.0037	0.2834	0.0039	0.2978	0.0043	0.2892
Chr1	20001	30000	0.0066	0.4479	0.0068	0.4169	0.0041	0.3077	0.0037	0.28	0.0042	0.3045	0.0048	0.3244
Chr1	30001	40000	0.0065	0.4231	0.0063	0.4031	0.0041	0.2956	0.0041	0.301	0.0047	0.3408	0.005	0.3399
Chr1	40001	50000	0.013	0.3193	0.0078	0.2975	0.0051	0.1242	0.0028	0.0938	0.0029	0.1511	0.0029	0.0751
Chr1	50001	60000	0.0256	0.2163	0.0156	0.1449	0.0049	0.046	0.0026	0.0271	0	0	0.0021	0.0214
Chr1	60001	70000	0.023	0.2053	0.0176	0.1918	0.0035	0.034	0.0025	0.0308	0.0029	0.04	0.0033	0.0346
Chr1	70001	80000	0.0259	0.2266	0.0266	0.2466	0.0046	0.0406	0.0039	0.044	0.0039	0.0482	0.0028	0.0283
Chr1	80001	90000	0.0289	0.2966	0.0245	0.291	0.0071	0.0848	0.0031	0.0409	0.001	0.0144	0.0023	0.0282
Chr1	90001	100000	0.0047	0.1095	0.0028	0.0841	0.0031	0.0595	0.0044	0.102	0.0043	0.1096	0.0035	0.0652
Chr1	100001	110000	0.0033	0.104	0.0033	0.0974	0.0039	0.1146	0.0029	0.0846	0.0027	0.079	0.003	0.0801
Chr1	110001	120000	0.0036	0.11	0.0035	0.1082	0.0032	0.0924	0.0032	0.0924	0.0033	0.0974	0.0039	0.0988
Chr1	120001	130000	0.0027	0.0824	0.0027	0.0846	0.003	0.0808	0.0029	0.0847	0.003	0.0909	0.0033	0.0884
Chr1	130001	140000	0.0033	0.1049	0.0037	0.1072	0.0037	0.1053	0.0032	0.0892	0.0032	0.0856	0.0035	0.091
Chr1	140001	150000	0.0033	0.0954	0.0026	0.0777	0.0031	0.0826	0.0039	0.1031	0.0039	0.101	0.0046	0.1073
Chr1	150001	160000	0.0032	0.1024	0.003	0.0903	0.0035	0.0998	0.0031	0.0905	0.003	0.0825	0.0032	0.0854
Chr1	160001	170000	0.0029	0.0892	0.0028	0.0871	0.0028	0.0801	0.0033	0.0952	0.0029	0.0839	0.003	0.0808
Chr1	170001	180000	0.0031	0.0971	0.003	0.0933	0.0032	0.0903	0.0033	0.0974	0.0031	0.0867	0.0033	0.0894
Chr1	180001	190000	0.0029	0.0904	0.0031	0.093	0.0028	0.0771	0.0028	0.0799	0.0031	0.0872	0.0031	0.078
Chr1	190001	200000	0.0033	0.1036	0.0028	0.0869	0.0035	0.1065	0.0024	0.0747	0.0026	0.0804	0.0027	0.0775
Chr1	200001	210000	0.0027	0.0822	0.0028	0.0817	0.0032	0.0878	0.0023	0.0689	0.0021	0.0578	0.003	0.0782
Chr1	210001	220000	0.0033	0.1056	0.0034	0.1068	0.0034	0.0961	0.0028	0.0822	0.0031	0.0891	0.003	0.0784
Chr1	220001	230000	0.0031	0.1025	0.0035	0.118	0.0033	0.1037	0.0033	0.0978	0.0032	0.0969	0.0033	0.0915
Chr1	230001	240000	0.0029	0.0948	0.0026	0.086	0.0029	0.0843	0.0028	0.0857	0.0034	0.0985	0.0033	0.0916
Chr1	240001	250000	0.0031	0.088	0.0028	0.0787	0.0032	0.0838	0.0032	0.0837	0.0028	0.0741	0.0031	0.0745
Chr1	250001	260000	0.0033	0.0971	0.0035	0.1051	0.0037	0.0993	0.0026	0.0714	0.0034	0.0934	0.0035	0.0914
Chr1	260001	270000	0.003	0.0873	0.0032	0.0966	0.0035	0.0975	0.0025	0.0718	0.0031	0.087	0.003	0.0773
Chr1	270001	280000	0.0034	0.1019	0.003	0.0904	0.0034	0.096	0.0029	0.084	0.0029	0.0846	0.003	0.0836
Chr1	280001	290000	0.003	0.0817	0.004	0.1136	0.0036	0.0948	0.0027	0.073	0.0027	0.0706	0.0032	0.0774
Chr1	290001	300000	0.0034	0.0971	0.0024	0.0721	0.0033	0.0902	0.003	0.0813	0.0036	0.0992	0.0034	0.085
Chr1	300001	310000	0.0034	0.0963	0.0034	0.0932	0.0035	0.088	0.0023	0.063	0.0028	0.0804	0.0027	0.0656
Chr1	310001	320000	0.0032	0.0935	0.0036	0.1071	0.0032	0.0876	0.0025	0.0744	0.0028	0.0801	0.0029	0.0784
Chr1	320001	330000	0.0034	0.0951	0.0035	0.1031	0.0034	0.0933	0.0027	0.0725	0.0033	0.089	0.0037	0.0934
Chr1	330001	340000	0.0029	0.091	0.0026	0.0782	0.0031	0.0814	0.0034	0.1003	0.0035	0.0998	0.0031	0.0778
Chr1	340001	350000	0.0029	0.0883	0.003	0.0959	0.003	0.086	0.0029	0.0807	0.0029	0.083	0.0031	0.0793
Chr1	350001	360000	0.0038	0.108	0.0028	0.0748	0.0037	0.096	0.0035	0.0944	0.0028	0.0784	0.0039	0.0955
Chr1	360001	370000	0.0028	0.0921	0.0032	0.101	0.0036	0.1094	0.0028	0.0875	0.0027	0.0812	0.0032	0.0908
Chr1	370001	380000	0.0028	0.0936	0.0028	0.0885	0.003	0.0911	0.0033	0.0988	0.0036	0.1038	0.0037	0.101
Chr1	380001	390000	0.0032	0.0893	0.0029	0.0807	0.0028	0.0745	0.0028	0.0765	0.0028	0.0767	0.0034	0.0886
Chr1	390001	400000	0.0029	0.0851	0.0037	0.1051	0.003	0.0815	0.0029	0.0814	0.0034	0.0968	0.003	0.0763
Chr1	400001	410000	0.0034	0.0925	0.0034	0.0931	0.0043	0.1076	0.0029	0.077	0.0036	0.0922	0.0033	0.0767
Chr1	410001	420000	0.0026	0.0857	0.0033	0.1064	0.0032	0.099	0.003	0.0893	0.003	0.0909	0.0032	0.0911
Chr1	420001	430000	0.0033	0.1003	0.0035	0.0988	0.0037	0.1046	0.0025	0.0754	0.0028	0.0836	0.0031	0.0827
Chr1	430001	440000	0.0033	0.0965	0.0037	0.1089	0.0034	0.0958	0.0035	0.1004	0.0031	0.0887	0.0034	0.0917
Chr1	440001	450000	0.0033	0.0989	0.0034	0.1061	0.0036	0.1069	0.0029	0.0832	0.0028	0.0809	0.0033	0.0907
Chr1	450001	460000	0.0031	0.0899	0.0033	0.0948	0.0031	0.0848	0.0033	0.0919	0.0033	0.0897	0.0029	0.0746
Chr1	460001	470000	0.0059	0.1054	0.0038	0.1057	0.0036	0.047	0.0037	0.0756	0.0034	0.0925	0.0029	0.0409
Chr1	470001	480000	0.0119	0.166	0.0034	0.0642	0.0042	0.0556	0.0029	0.0493	0.0029	0.0604	0.0027	0.0363
Chr1	480001	490000	0.004	0.1042	0.0031	0.0906	0.0035	0.0818	0.0028	0.0751	0.0031	0.0863	0.0032	0.0717
Chr1	490001	500000	0.0029	0.0863	0.003	0.0872	0.0035	0.0924	0.0032	0.0888	0.0033	0.0925	0.003	0.0777
Chr1	500001	510000	0.003	0.0885	0.0028	0.085	0.0032	0.0885	0.0027	0.0761	0.0025	0.0764	0.0031	0.0872
Chr1	510001	520000	0.0032	0.0934	0.0028	0.0866	0.0036	0.0976	0.0032	0.0922	0.0033	0.091	0.0034	0.0873
Chr1	520001	530000	0.003	0.0903	0.0033	0.0955	0.0034	0.0929	0.0028	0.0802	0.0036	0.0997	0.0031	0.0792
Chr1	530001	540000	0.0031	0.0934	0.0026	0.0795	0.0028	0.0767	0.0031	0.0859	0.003	0.0813	0.003	0.0751
Chr1	540001	550000	0.0045	0.1009	0.0036	0.0928	0.0036	0.06	0.0027	0.0655	0.0031	0.0833	0.0038	0.0627
Chr1	550001	560000	0.0052	0.1458	0.0044	0.1562	0.0044	0.0677	0.0028	0.0789	0.0026	0.0976	0.0025	0.0412
Chr1	560001	570000	0.0225	0.1739	0.0119	0.1071	0.0031	0.0241	0.0061	0.0625	0	0	0.0028	0.0288
Chr1	570001	580000	0.0051	0.1122	0.0041	0.1198	0.0037	0.0502	0.0021	0.0515	0.0018	0.0529	0.0026	0.0374
Chr1	580001	590000	0.0145	0.098	0.0355	0.2857	0.0058	0.0448	0.0025	0.0243	0	0	0.0021	0.0203
Chr1	590001	600000	0.013	0.0909	0.0104	0.0417	0.0044	0.0346	0.005	0.0472	0.0043	0.0417	0.003	0.0273
Chr1	600001	610000	0.0049	0.1333	0.0029	0.0938	0.0033	0.0717	0.0021	0.0634	0.0029	0.0962	0.0032	0.0681
Chr1	610001	620000	0.0044	0.1043	0.0033	0.1039	0.0027	0.0474	0.0032	0.0736	0.0042	0.1326	0.0038	0.0569
Chr1	620001	630000	0.0179	0.1205	0.0166	0.1333	0.0043	0.0309	0.0022	0.0175	0.0033	0.0323	0.0026	0.024
Chr1	630001	640000	0.026	0.178	0.0048	0.0513	0.004	0.0353	0.0055	0.0568	0.0046	0.0488	0.0043	0.0388
Chr1	640001	650000	0.0185	0.1755	0.0079	0.11	0.0033	0.0348	0.0045	0.0447	0.0027	0.0291	0.0032	0.0303
Chr1	650001	660000	0.0155	0.1353	0.0087	0.093	0.0033	0.0272	0.0047	0.0481	0	0	0.0027	0.0269
Chr1	660001	670000	0.0176	0.121	0.0082	0.0833	0.0029	0.0232	0.0025	0.0247	0	0	0.0025	0.0225
Chr1	670001	680000	0.0197	0.1473	0.0139	0.1463	0.004	0.0314	0.0019	0.0208	0.0017	0.0222	0.0024	0.0238
Chr1	680001	690000	0.0036	0.0898	0.0027	0.0747	0.0034	0.0815	0.0037	0.1016	0.0033	0.0933	0.0035	0.0819
Chr1	690001	700000	0.0026	0.0721	0.0033	0.0942	0.0034	0.0906	0.0028	0.0769	0.003	0.0861	0.0031	0.077
Chr1	700001	710000	0.003	0.0928	0.0032	0.0986	0.0031	0.0888	0.0032	0.0993	0.0031	0.0902	0.0036	0.0992
Chr1	710001	720000	0.0028	0.0793	0.0028	0.078	0.0032	0.0767	0.0031	0.0812	0.0029	0.0772	0.0032	0.071
Chr1	720001	730000	0.0036	0.105	0.0034	0.0949	0.0041	0.1029	0.0026	0.0726	0.0028	0.0746	0.0031	0.0767
Chr1	730001	740000	0.047	0.3803	0.015	0.2148	0.0065	0.0826	0.0025	0.0383	0.0031	0.053	0.0031	0.0404
Chr1	740001	750000	0.0059	0.146	0.0033	0.1071	0.0034	0.0866	0.0036	0.0978	0.0037	0.1201	0.0039	0.0981
Chr1	750001	760000	0.0074	0.1469	0.004	0.1066	0.0036	0.0799	0.0028	0.0733	0.0028	0.0838	0.0031	0.0622
Chr1	760001	770000	0.0031	0.089	0.0029	0.0825	0.0032	0.0857	0.0027	0.0747	0.0029	0.0786	0.0029	0.0739
Chr1	770001	780000	0.0032	0.0871	0.0037	0.0999	0.0034	0.0844	0.0026	0.0652	0.0031	0.0763	0.0028	0.0647
Chr1	780001	790000	0.0028	0.0757	0.0036	0.0953	0.0035	0.0817	0.0032	0.0821	0.0034	0.0855	0.0031	0.0725
Chr1	790001	800000	0.0035	0.098	0.0034	0.0959	0.0037	0.0903	0.0046	0.1215	0.0039	0.1094	0.004	0.0939
Chr1	800001	810000	0.003	0.0921	0.0028	0.0826	0.0029	0.08	0.0028	0.0804	0.0023	0.0668	0.0028	0.0715
Chr1	810001	820000	0.0033	0.102	0.0036	0.1182	0.0031	0.0872	0.0029	0.0862	0.0034	0.1016	0.0032	0.0834
Chr1	820001	830000	0.0032	0.0925	0.0033	0.0882	0.0037	0.0927	0.0027	0.0767	0.0028	0.0778	0.0038	0.0912
Chr1	830001	840000	0.0033	0.1026	0.0034	0.1044	0.0032	0.0888	0.0031	0.093	0.0032	0.0952	0.0032	0.0814
Chr1	840001	850000	0.003	0.0987	0.0036	0.1111	0.0034	0.0949	0.003	0.089	0.0024	0.0719	0.0031	0.0832
Chr1	850001	860000	0.003	0.0977	0.0033	0.1091	0.0032	0.0973	0.0026	0.0775	0.0033	0.1014	0.0035	0.0956
Chr1	860001	870000	0.0034	0.1007	0.0031	0.0895	0.0035	0.0873	0.0028	0.0792	0.003	0.0838	0.0026	0.0653
Chr1	870001	880000	0.0035	0.0886	0.0024	0.0627	0.0029	0.0726	0.0026	0.0665	0.003	0.0746	0.0028	0.0639
Chr1	880001	890000	0.0033	0.0971	0.0036	0.1081	0.0036	0.0973	0.003	0.0851	0.0031	0.0881	0.0035	0.0878
Chr1	890001	900000	0.003	0.09	0.0024	0.0705	0.0032	0.0854	0.0032	0.0906	0.0029	0.0839	0.0031	0.0828
Chr1	900001	910000	0.0031	0.0808	0.0035	0.0896	0.0029	0.0667	0.0032	0.0837	0.0035	0.09	0.0034	0.0776
Chr1	910001	920000	0.003	0.1005	0.0031	0.0989	0.0035	0.1121	0.0027	0.0896	0.0032	0.0997	0.0033	0.0992
Chr1	920001	930000	0.0034	0.0856	0.0031	0.0812	0.0033	0.0764	0.0032	0.0825	0.0032	0.0784	0.0032	0.0733
Chr1	930001	940000	0.0028	0.0887	0.0033	0.1008	0.0033	0.0916	0.0027	0.083	0.0026	0.0748	0.0032	0.084
Chr1	940001	950000	0.003	0.0963	0.003	0.0952	0.0028	0.0804	0.0041	0.1228	0.0034	0.0988	0.0038	0.1008
Chr1	950001	960000	0.0031	0.0857	0.0024	0.0645	0.0027	0.0673	0.0031	0.0782	0.0029	0.0759	0.0035	0.0795
Chr1	960001	970000	0.003	0.095	0.0031	0.0991	0.003	0.0895	0.0032	0.0938	0.0031	0.0889	0.0034	0.0908
Chr1	970001	980000	0.0033	0.0972	0.0034	0.1028	0.0032	0.0891	0.0027	0.0802	0.0026	0.0768	0.0029	0.0791
Chr1	980001	990000	0.0032	0.0939	0.0034	0.102	0.0034	0.0971	0.0028	0.0831	0.0028	0.084	0.0033	0.0919
Chr1	990001	1000000	0.003	0.0905	0.0029	0.092	0.0034	0.0944	0.0026	0.0805	0.0026	0.0815	0.0029	0.0775
Chr1	1000001	1010000	0.0028	0.0847	0.0032	0.0965	0.0039	0.1054	0.0032	0.09	0.0031	0.0899	0.0033	0.0867
Chr1	1010001	1020000	0.0034	0.0894	0.0034	0.0926	0.0035	0.0874	0.0027	0.0704	0.0031	0.0796	0.0029	0.0671
Chr1	1020001	1030000	0.0027	0.0726	0.0026	0.0719	0.0029	0.0723	0.0032	0.0823	0.0034	0.0909	0.0033	0.0785
Chr1	1030001	1040000	0.0033	0.0857	0.0031	0.0788	0.0032	0.0757	0.003	0.0759	0.0029	0.0723	0.0032	0.0705
Chr1	1040001	1050000	0.0031	0.0936	0.0031	0.1012	0.0033	0.0937	0.0034	0.0973	0.0029	0.0838	0.0026	0.0657
Chr1	1050001	1060000	0.0031	0.0829	0.0031	0.0865	0.0029	0.0722	0.0027	0.0731	0.0036	0.0924	0.0032	0.0747
Chr1	1060001	1070000	0.0039	0.1103	0.0034	0.095	0.0037	0.0959	0.0023	0.0662	0.0025	0.0711	0.0034	0.0821
Chr1	1070001	1080000	0.0025	0.0628	0.0033	0.0789	0.0028	0.0639	0.0034	0.0851	0.0036	0.0855	0.0037	0.0789
Chr1	1080001	1090000	0.0029	0.0812	0.0028	0.0781	0.0031	0.0757	0.0034	0.09	0.0034	0.095	0.0038	0.0876
Chr1	1090001	1100000	0.0023	0.0687	0.0026	0.0769	0.0028	0.0754	0.0029	0.0868	0.0029	0.0801	0.0032	0.0795
Chr1	1100001	1110000	0.0034	0.1016	0.0028	0.0852	0.0035	0.0936	0.0033	0.0944	0.0027	0.0807	0.0034	0.087
Chr1	1110001	1120000	0.003	0.0859	0.0035	0.0992	0.0033	0.0836	0.0033	0.0883	0.0034	0.0952	0.0033	0.0817
Chr1	1120001	1130000	0.007	0.1225	0.0038	0.0952	0.0032	0.0793	0.003	0.0777	0.003	0.0792	0.0032	0.0722
Chr1	1130001	1140000	0.0028	0.0747	0.0035	0.0991	0.0036	0.0884	0.0031	0.081	0.0033	0.0858	0.0038	0.0841
Chr1	1140001	1150000	0.003	0.0789	0.003	0.0757	0.0029	0.0665	0.0033	0.0836	0.0029	0.0715	0.0035	0.0785
Chr1	1150001	1160000	0.0031	0.0864	0.0026	0.0732	0.0034	0.0916	0.0029	0.0787	0.0027	0.0766	0.0027	0.074
Chr1	1160001	1170000	0.0032	0.0811	0.0028	0.0719	0.0036	0.0769	0.0029	0.0713	0.0029	0.0766	0.0032	0.0701
Chr1	1170001	1180000	0.0024	0.0752	0.0031	0.0976	0.0029	0.0832	0.0027	0.08	0.0023	0.0683	0.0032	0.0875
Chr1	1180001	1190000	0.0032	0.0961	0.0033	0.1011	0.0036	0.1028	0.0026	0.0789	0.0031	0.0878	0.0034	0.0952
Chr1	1190001	1200000	0.0027	0.0749	0.0033	0.0874	0.0035	0.0854	0.0031	0.0846	0.0031	0.0852	0.0033	0.076
Chr1	1200001	1210000	0.0034	0.1015	0.0034	0.0973	0.0036	0.0962	0.0033	0.0935	0.0032	0.0893	0.0031	0.0786
Chr1	1210001	1220000	0.003	0.0894	0.0033	0.0948	0.0037	0.1015	0.0029	0.081	0.0032	0.0914	0.0035	0.0887
Chr1	1220001	1230000	0.0035	0.1133	0.0033	0.1103	0.0031	0.099	0.0031	0.0961	0.0029	0.0899	0.0031	0.0915
Chr1	1230001	1240000	0.003	0.0839	0.0029	0.0847	0.0033	0.0925	0.0028	0.0777	0.003	0.0827	0.003	0.0777
Chr1	1240001	1250000	0.0034	0.0956	0.0034	0.1021	0.0036	0.098	0.0029	0.0833	0.0031	0.0863	0.0032	0.0802
Chr1	1250001	1260000	0.0029	0.0918	0.0027	0.0866	0.0029	0.0886	0.0023	0.0721	0.0032	0.0932	0.0036	0.0987
Chr1	1260001	1270000	0.0036	0.1178	0.0041	0.1304	0.0045	0.1259	0.0026	0.0738	0.0037	0.1055	0.0032	0.08
Chr1	1270001	1280000	0.003	0.0894	0.0031	0.0903	0.0035	0.0965	0.0035	0.1039	0.0033	0.0962	0.0037	0.0979
Chr1	1280001	1290000	0.0041	0.1225	0.0032	0.0965	0.0039	0.1094	0.0032	0.0926	0.0034	0.0994	0.0033	0.0923
Chr1	1290001	1300000	0.0033	0.0953	0.003	0.0872	0.003	0.0775	0.003	0.0836	0.0027	0.0731	0.0031	0.0764
Chr1	1300001	1310000	0.0037	0.1058	0.0032	0.0909	0.0038	0.1045	0.0031	0.0882	0.0032	0.0925	0.0033	0.0895
Chr1	1310001	1320000	0.0032	0.0962	0.0032	0.0913	0.0033	0.0874	0.0033	0.0899	0.0027	0.072	0.0035	0.0866
Chr1	1320001	1330000	0.0034	0.1052	0.003	0.0912	0.0037	0.106	0.0034	0.0915	0.0032	0.0856	0.0038	0.0941
Chr1	1330001	1340000	0.0029	0.0845	0.0029	0.0833	0.0033	0.0828	0.0027	0.0763	0.003	0.0804	0.0031	0.0755
Chr1	1340001	1350000	0.0031	0.097	0.0035	0.1103	0.0037	0.101	0.0024	0.0745	0.0028	0.0801	0.0029	0.0757
Chr1	1350001	1360000	0.003	0.093	0.0029	0.0884	0.0032	0.0891	0.0029	0.0871	0.002	0.0584	0.0029	0.0744
Chr1	1360001	1370000	0.003	0.0874	0.0026	0.0785	0.0032	0.0823	0.0034	0.0909	0.0033	0.092	0.0031	0.0753
Chr1	1370001	1380000	0.0032	0.0992	0.0033	0.1011	0.0037	0.1061	0.0031	0.0941	0.0035	0.1036	0.0033	0.0873
Chr1	1380001	1390000	0.003	0.0943	0.003	0.091	0.0031	0.0913	0.0025	0.0776	0.0027	0.0777	0.0029	0.0767
Chr1	1390001	1400000	0.0033	0.1049	0.0032	0.1037	0.0033	0.0967	0.0028	0.0848	0.0028	0.0846	0.003	0.0851
Chr1	1400001	1410000	0.0028	0.0902	0.0031	0.0958	0.0031	0.0953	0.0032	0.0945	0.0031	0.092	0.0029	0.0839
Chr1	1410001	1420000	0.0024	0.0734	0.003	0.0896	0.0034	0.095	0.0026	0.0757	0.0032	0.0886	0.0029	0.0776
Chr1	1420001	1430000	0.0026	0.0792	0.0027	0.0851	0.0034	0.0937	0.0033	0.095	0.003	0.0845	0.0034	0.0906
Chr1	1430001	1440000	0.0033	0.0954	0.0033	0.0922	0.0034	0.0979	0.0028	0.0836	0.0028	0.0828	0.0034	0.0937
Chr1	1440001	1450000	0.0031	0.0872	0.0032	0.0919	0.004	0.1025	0.0027	0.0741	0.0025	0.0678	0.0029	0.0738
Chr1	1450001	1460000	0.0027	0.0839	0.0034	0.0974	0.0032	0.0909	0.0027	0.0812	0.0039	0.1067	0.0036	0.0933
Chr1	1460001	1470000	0.0027	0.0763	0.0027	0.0825	0.0032	0.0864	0.0027	0.0764	0.0033	0.0902	0.0035	0.09
Chr1	1470001	1480000	0.0034	0.1045	0.0038	0.1141	0.0034	0.0949	0.0026	0.0733	0.003	0.0873	0.0033	0.089
Chr1	1480001	1490000	0.0027	0.0822	0.0036	0.1108	0.003	0.0874	0.0034	0.0977	0.0029	0.0838	0.0032	0.0848
Chr1	1490001	1500000	0.003	0.0872	0.0034	0.0953	0.0035	0.0853	0.0027	0.0727	0.0031	0.0776	0.0035	0.0835
Chr1	1500001	1510000	0.0029	0.0847	0.003	0.0912	0.0034	0.0913	0.0031	0.0869	0.0026	0.0728	0.0027	0.0696
Chr1	1510001	1520000	0.0029	0.0865	0.0033	0.0918	0.0033	0.0889	0.0027	0.0797	0.0035	0.0933	0.0029	0.0734
Chr1	1520001	1530000	0.0032	0.092	0.0028	0.0833	0.0037	0.0991	0.0032	0.0873	0.0034	0.0927	0.0036	0.0878
Chr1	1530001	1540000	0.0031	0.0967	0.0039	0.1154	0.003	0.0862	0.0033	0.0884	0.003	0.0826	0.0036	0.0944
Chr1	1540001	1550000	0.003	0.0839	0.0038	0.1078	0.0035	0.0902	0.0027	0.0714	0.0037	0.0948	0.0034	0.0813
Chr1	1550001	1560000	0.0039	0.1121	0.0028	0.0799	0.0032	0.0813	0.0027	0.0749	0.0028	0.0749	0.0036	0.086
Chr1	1560001	1570000	0.0029	0.0848	0.0026	0.0749	0.0035	0.0861	0.0023	0.0634	0.0024	0.0651	0.0032	0.0762
Chr1	1570001	1580000	0.0033	0.0925	0.0026	0.0724	0.0034	0.086	0.003	0.0851	0.0027	0.0733	0.0027	0.0679
Chr1	1580001	1590000	0.0032	0.1027	0.0036	0.1161	0.0032	0.0991	0.0027	0.0817	0.0032	0.1023	0.0037	0.1042
Chr1	1590001	1600000	0.0027	0.0803	0.0027	0.0764	0.0031	0.0827	0.0027	0.0728	0.0029	0.0776	0.0033	0.0807
Chr1	1600001	1610000	0.0031	0.0981	0.0036	0.1073	0.0033	0.091	0.0028	0.0871	0.0028	0.0817	0.003	0.0812
Chr1	1610001	1620000	0.0027	0.0805	0.0029	0.0875	0.003	0.0832	0.0033	0.0923	0.0031	0.0834	0.0034	0.0886
Chr1	1620001	1630000	0.0036	0.0989	0.0032	0.0918	0.004	0.1081	0.0031	0.0805	0.0035	0.0916	0.0036	0.0858
Chr1	1630001	1640000	0.0034	0.0923	0.0035	0.0955	0.0037	0.0892	0.0029	0.0779	0.0031	0.085	0.0034	0.0811
Chr1	1640001	1650000	0.003	0.0918	0.0032	0.0945	0.003	0.0827	0.0029	0.0843	0.0033	0.0892	0.0032	0.0831
Chr1	1650001	1660000	0.0024	0.0729	0.0026	0.079	0.0031	0.0824	0.0023	0.0675	0.0029	0.083	0.0029	0.0722
Chr1	1660001	1670000	0.0031	0.0859	0.0028	0.0824	0.0032	0.0871	0.0026	0.0755	0.0028	0.0742	0.0031	0.0806
Chr1	1670001	1680000	0.0031	0.0863	0.0027	0.0759	0.0032	0.0813	0.0025	0.0691	0.0031	0.0849	0.0032	0.0769
Chr1	1680001	1690000	0.0031	0.0972	0.0035	0.103	0.0033	0.0912	0.0029	0.09	0.003	0.0891	0.0027	0.0743
Chr1	1690001	1700000	0.0027	0.0844	0.0032	0.1037	0.0034	0.1015	0.0027	0.0828	0.0028	0.0818	0.0032	0.0866
Chr1	1700001	1710000	0.0044	0.1188	0.0035	0.0938	0.0036	0.0932	0.0031	0.0841	0.0023	0.0623	0.0033	0.0834
Chr1	1710001	1720000	0.0027	0.0806	0.0026	0.0787	0.003	0.0866	0.0034	0.0987	0.0028	0.0787	0.0031	0.0805
Chr1	1720001	1730000	0.0035	0.11	0.0035	0.1107	0.0042	0.1239	0.0031	0.0933	0.0036	0.1095	0.0035	0.0985
Chr1	1730001	1740000	0.0029	0.0861	0.0032	0.0906	0.0034	0.0908	0.0031	0.0925	0.0032	0.0904	0.0031	0.08
Chr1	1740001	1750000	0.0031	0.0929	0.0031	0.0918	0.0035	0.0936	0.0026	0.0752	0.0026	0.075	0.0032	0.083
Chr1	1750001	1760000	0.0034	0.0954	0.0027	0.0831	0.0032	0.0858	0.0027	0.0811	0.0033	0.0993	0.0026	0.0684
Chr1	1760001	1770000	0.0029	0.0898	0.0028	0.0853	0.0034	0.099	0.0028	0.0815	0.0028	0.0781	0.0031	0.0839
Chr1	1770001	1780000	0.0032	0.1011	0.0035	0.1065	0.0031	0.0883	0.0028	0.0805	0.0027	0.0802	0.0031	0.0811
Chr1	1780001	1790000	0.0022	0.0637	0.0031	0.0899	0.0029	0.0774	0.0028	0.0794	0.003	0.0824	0.0031	0.0787
Chr1	1790001	1800000	0.0034	0.1109	0.0037	0.1211	0.0033	0.1019	0.0036	0.1093	0.0035	0.1089	0.0039	0.1146
Chr1	1800001	1810000	0.0033	0.1014	0.003	0.0947	0.0034	0.0973	0.0026	0.0759	0.0025	0.0732	0.0029	0.0798
Chr1	1810001	1820000	0.0029	0.0851	0.0029	0.0881	0.0032	0.0907	0.0028	0.0831	0.0026	0.0788	0.0028	0.0749
Chr1	1820001	1830000	0.0028	0.0908	0.0031	0.1032	0.0036	0.1073	0.003	0.0887	0.0034	0.0942	0.0034	0.0926
Chr1	1830001	1840000	0.0029	0.0804	0.0033	0.0873	0.0034	0.0823	0.0029	0.0781	0.0032	0.084	0.0029	0.0678
Chr1	1840001	1850000	0.0028	0.0844	0.0027	0.0826	0.0026	0.0712	0.0033	0.0942	0.0034	0.0961	0.0034	0.0872
Chr1	1850001	1860000	0.0027	0.0859	0.0029	0.0888	0.0032	0.0922	0.0027	0.0811	0.0028	0.081	0.0032	0.0846
Chr1	1860001	1870000	0.0033	0.0957	0.0028	0.0833	0.0033	0.0903	0.0035	0.0971	0.0033	0.0932	0.0038	0.0962
Chr1	1870001	1880000	0.0032	0.0992	0.0033	0.1	0.0033	0.0954	0.0031	0.0933	0.0026	0.0765	0.0033	0.0888
Chr1	1880001	1890000	0.0028	0.0845	0.0029	0.0845	0.0031	0.0927	0.0029	0.0812	0.0031	0.0898	0.004	0.1047
Chr1	1890001	1900000	0.003	0.0853	0.0033	0.0997	0.0036	0.0953	0.0031	0.0866	0.0028	0.0816	0.003	0.077
Chr1	1900001	1910000	0.0031	0.097	0.0032	0.0942	0.0032	0.0828	0.0031	0.0867	0.003	0.0769	0.0034	0.0805
Chr1	1910001	1920000	0.0029	0.0858	0.0028	0.0881	0.0029	0.0848	0.0024	0.0728	0.0027	0.08	0.003	0.0844
Chr1	1920001	1930000	0.0032	0.0889	0.0031	0.0898	0.0031	0.0799	0.0029	0.0819	0.003	0.084	0.0034	0.084
Chr1	1930001	1940000	0.0031	0.0857	0.0029	0.0765	0.003	0.0763	0.0028	0.0793	0.0029	0.0797	0.0039	0.0926
Chr1	1940001	1950000	0.003	0.0873	0.0025	0.07	0.0029	0.0726	0.0032	0.0881	0.0035	0.0916	0.0034	0.0843
Chr1	1950001	1960000	0.0034	0.0964	0.0032	0.0888	0.0029	0.0731	0.0031	0.0827	0.003	0.0803	0.0034	0.0839
Chr1	1960001	1970000	0.0033	0.0856	0.0035	0.0918	0.0034	0.0809	0.0033	0.0804	0.0033	0.0835	0.0039	0.0885
Chr1	1970001	1980000	0.0029	0.0738	0.0036	0.0904	0.0032	0.0759	0.0031	0.0778	0.0028	0.0737	0.003	0.0676
Chr1	1980001	1990000	0.0035	0.107	0.0037	0.1108	0.0035	0.0926	0.0031	0.0835	0.0033	0.0911	0.0029	0.0723
Chr1	1990001	2000000	0.0031	0.0897	0.0029	0.0862	0.0034	0.0963	0.0028	0.0801	0.0027	0.0773	0.0033	0.0838
Chr1	2000001	2010000	0.0035	0.1024	0.0033	0.0962	0.0041	0.1103	0.0026	0.0742	0.003	0.0851	0.0032	0.0848
Chr1	2010001	2020000	0.0032	0.0886	0.0037	0.1009	0.0044	0.1075	0.0038	0.098	0.0028	0.0772	0.0032	0.0774
Chr1	2020001	2030000	0.0029	0.0845	0.0032	0.09	0.0032	0.0784	0.0037	0.0999	0.0037	0.0987	0.0038	0.0888
Chr1	2030001	2040000	0.003	0.0968	0.0037	0.115	0.0031	0.0897	0.0031	0.0904	0.0024	0.0724	0.0029	0.076
Chr1	2040001	2050000	0.0029	0.0873	0.0032	0.0931	0.0037	0.1024	0.0032	0.0885	0.0036	0.104	0.0032	0.0869
Chr1	2050001	2060000	0.0032	0.0965	0.0032	0.0856	0.0032	0.0841	0.0028	0.0788	0.0031	0.0815	0.0031	0.0758
Chr1	2060001	2070000	0.003	0.0958	0.0028	0.0911	0.0033	0.0948	0.0037	0.1081	0.0039	0.1123	0.0039	0.1067
Chr1	2070001	2080000	0.0029	0.0907	0.0035	0.103	0.0032	0.0887	0.003	0.0907	0.0031	0.0908	0.0032	0.087
Chr1	2080001	2090000	0.0029	0.0822	0.0034	0.1016	0.0032	0.0956	0.003	0.0863	0.0033	0.0982	0.0033	0.0902
Chr1	2090001	2100000	0.0031	0.0996	0.003	0.0978	0.0038	0.1074	0.0033	0.0967	0.0029	0.0907	0.0036	0.0998
Chr1	2100001	2110000	0.0032	0.0934	0.0029	0.0881	0.0028	0.0799	0.0029	0.083	0.0029	0.0826	0.0033	0.0869
Chr1	2110001	2120000	0.0029	0.093	0.0029	0.0945	0.0036	0.1059	0.0027	0.0783	0.0031	0.087	0.0032	0.0848
Chr1	2120001	2130000	0.0032	0.0996	0.0027	0.0838	0.004	0.118	0.0028	0.0846	0.003	0.082	0.0033	0.0874
Chr1	2130001	2140000	0.0035	0.1076	0.0029	0.0863	0.0036	0.1035	0.0029	0.0853	0.0031	0.0873	0.0028	0.0773
Chr1	2140001	2150000	0.0028	0.0826	0.0033	0.1003	0.003	0.0808	0.0026	0.0806	0.0026	0.0777	0.0031	0.0814
Chr1	2150001	2160000	0.0028	0.0834	0.0033	0.0975	0.0035	0.0941	0.0027	0.0786	0.0033	0.0936	0.0034	0.0885
Chr1	2160001	2170000	0.0033	0.0893	0.0034	0.09	0.0035	0.0847	0.003	0.0834	0.0028	0.0793	0.003	0.0707
Chr1	2170001	2180000	0.0033	0.0971	0.0036	0.1064	0.0038	0.1059	0.0032	0.0908	0.0031	0.0896	0.0032	0.083
Chr1	2180001	2190000	0.0034	0.0863	0.0041	0.1042	0.0034	0.0773	0.0032	0.0757	0.0031	0.0792	0.0042	0.0893
Chr1	2190001	2200000	0.0034	0.1059	0.0032	0.1047	0.0032	0.0927	0.0028	0.0816	0.0027	0.0781	0.0029	0.0765
Chr1	2200001	2210000	0.004	0.1151	0.0031	0.0905	0.0033	0.0849	0.0029	0.0756	0.0028	0.0736	0.0031	0.0708
Chr1	2210001	2220000	0.0031	0.0895	0.003	0.09	0.0033	0.0894	0.0027	0.077	0.0028	0.0819	0.0031	0.0766
Chr1	2220001	2230000	0.004	0.1178	0.0031	0.0932	0.0035	0.0962	0.0034	0.095	0.0026	0.0774	0.0033	0.0843
Chr1	2230001	2240000	0.0036	0.1114	0.0032	0.096	0.0043	0.1235	0.0028	0.0873	0.0026	0.0779	0.0028	0.0772
Chr1	2240001	2250000	0.0036	0.106	0.0036	0.1095	0.0038	0.105	0.0027	0.0773	0.0027	0.0783	0.0029	0.0789
Chr1	2250001	2260000	0.0032	0.0973	0.0031	0.0916	0.0032	0.0872	0.0027	0.0781	0.0028	0.0829	0.003	0.0772
Chr1	2260001	2270000	0.0026	0.0888	0.0036	0.1231	0.0034	0.1089	0.0032	0.0972	0.0034	0.1037	0.0033	0.0943
Chr1	2270001	2280000	0.0031	0.094	0.0027	0.0821	0.0033	0.0948	0.0027	0.081	0.003	0.0851	0.0032	0.0879
Chr1	2280001	2290000	0.0027	0.0678	0.0029	0.0757	0.0028	0.0664	0.0033	0.0846	0.0037	0.0922	0.0042	0.0924
Chr1	2290001	2300000	0.0028	0.075	0.0028	0.0744	0.0031	0.0725	0.0038	0.0991	0.0034	0.0847	0.0033	0.0735
Chr1	2300001	2310000	0.0037	0.1132	0.0035	0.1043	0.0039	0.1085	0.003	0.0868	0.0034	0.0984	0.0029	0.0764
Chr1	2310001	2320000	0.0033	0.1024	0.0031	0.0969	0.0035	0.1022	0.003	0.0803	0.0034	0.0931	0.0027	0.0685
Chr1	2320001	2330000	0.0038	0.105	0.0031	0.0866	0.0034	0.0903	0.0032	0.09	0.0028	0.0787	0.0032	0.0786
Chr1	2330001	2340000	0.0034	0.1049	0.0034	0.0997	0.0034	0.0899	0.003	0.0899	0.0034	0.0906	0.0032	0.0803
Chr1	2340001	2350000	0.0031	0.0939	0.0032	0.0966	0.0033	0.0888	0.0033	0.092	0.0033	0.0939	0.0031	0.0817
Chr1	2350001	2360000	0.0033	0.0992	0.0033	0.1009	0.004	0.1116	0.0031	0.0888	0.0028	0.0811	0.003	0.078
Chr1	2360001	2370000	0.0025	0.0768	0.003	0.0925	0.003	0.0886	0.0027	0.0821	0.0031	0.0907	0.0031	0.0871
Chr1	2370001	2380000	0.0033	0.0983	0.0034	0.0988	0.003	0.0828	0.003	0.0863	0.0029	0.0829	0.0032	0.0811
Chr1	2380001	2390000	0.0033	0.1002	0.0034	0.103	0.004	0.1152	0.0032	0.0944	0.0029	0.0859	0.0033	0.086
Chr1	2390001	2400000	0.003	0.088	0.0036	0.1022	0.0035	0.0971	0.0027	0.0753	0.0032	0.0938	0.0031	0.0817
Chr1	2400001	2410000	0.0027	0.0797	0.0033	0.095	0.0029	0.0763	0.0028	0.0798	0.0025	0.0676	0.0029	0.0702
Chr1	2410001	2420000	0.0041	0.1101	0.0039	0.1042	0.0039	0.0971	0.0033	0.0895	0.0032	0.0844	0.0034	0.0821
Chr1	2420001	2430000	0.003	0.0837	0.0033	0.0851	0.003	0.0697	0.0032	0.0836	0.0038	0.0965	0.0029	0.0674
Chr1	2430001	2440000	0.0029	0.0916	0.0039	0.1255	0.0035	0.1007	0.0034	0.095	0.0034	0.0957	0.0033	0.0843
Chr1	2440001	2450000	0.0032	0.1003	0.0036	0.1154	0.0034	0.0925	0.0024	0.0734	0.0028	0.0824	0.0032	0.0832
Chr1	2450001	2460000	0.0025	0.0742	0.0028	0.0828	0.0028	0.0757	0.003	0.0824	0.0025	0.0691	0.0027	0.0691
Chr1	2460001	2470000	0.0031	0.0956	0.0035	0.1063	0.0035	0.1047	0.0028	0.0828	0.003	0.087	0.0033	0.0934
Chr1	2470001	2480000	0.0032	0.087	0.003	0.083	0.0029	0.0782	0.0031	0.0839	0.0029	0.0737	0.003	0.0731
Chr1	2480001	2490000	0.0028	0.0765	0.0029	0.0783	0.003	0.0721	0.0025	0.0666	0.0029	0.0712	0.0029	0.0679
Chr1	2490001	2500000	0.003	0.0835	0.003	0.0835	0.0034	0.0905	0.0026	0.0714	0.0026	0.0685	0.003	0.0739
Chr1	2500001	2510000	0.0038	0.1227	0.0038	0.1195	0.0038	0.1107	0.0026	0.0773	0.0021	0.0606	0.0025	0.0694
Chr1	2510001	2520000	0.0032	0.0969	0.0033	0.1032	0.0028	0.08	0.003	0.0899	0.0032	0.097	0.0032	0.087
Chr1	2520001	2530000	0.0031	0.0966	0.0036	0.1098	0.0034	0.0932	0.0033	0.0912	0.0033	0.0958	0.0038	0.0932
Chr1	2530001	2540000	0.0029	0.0802	0.0032	0.0954	0.0033	0.0853	0.003	0.081	0.0033	0.0914	0.0037	0.0907
Chr1	2540001	2550000	0.0033	0.0962	0.0031	0.0875	0.0031	0.0806	0.0027	0.0717	0.0035	0.0921	0.0035	0.0823
Chr1	2550001	2560000	0.0038	0.1102	0.004	0.115	0.0036	0.0969	0.0027	0.0777	0.0029	0.0766	0.0031	0.076
Chr1	2560001	2570000	0.0033	0.1001	0.0031	0.0923	0.0032	0.0892	0.0029	0.0839	0.003	0.0816	0.0032	0.0838
Chr1	2570001	2580000	0.0031	0.0764	0.0034	0.0815	0.0032	0.0723	0.0031	0.0766	0.0029	0.0711	0.0027	0.0592
Chr1	2580001	2590000	0.0034	0.0952	0.0032	0.0873	0.0032	0.0803	0.0029	0.0792	0.0035	0.09	0.003	0.0728
Chr1	2590001	2600000	0.0032	0.0894	0.0029	0.0851	0.0034	0.0885	0.0032	0.0874	0.0034	0.0948	0.0032	0.0818
Chr1	2600001	2610000	0.0039	0.1116	0.0037	0.1052	0.0039	0.0996	0.0025	0.0688	0.0029	0.0819	0.0032	0.078
Chr1	2610001	2620000	0.0026	0.0764	0.0032	0.0913	0.0039	0.1032	0.0025	0.0686	0.0028	0.0777	0.0032	0.0793
Chr1	2620001	2630000	0.0037	0.1088	0.0037	0.1019	0.004	0.0899	0.0035	0.0951	0.0035	0.0878	0.0028	0.0619
Chr1	2630001	2640000	0.0034	0.0857	0.0028	0.0722	0.0031	0.0761	0.003	0.0734	0.003	0.0754	0.0035	0.0842
Chr1	2640001	2650000	0.003	0.0831	0.0034	0.0952	0.0035	0.0868	0.0031	0.0838	0.0034	0.0952	0.0034	0.0835
Chr1	2650001	2660000	0.0032	0.0967	0.0034	0.1015	0.0038	0.1066	0.0037	0.1014	0.0038	0.1028	0.0037	0.0957
Chr1	2660001	2670000	0.0029	0.082	0.0031	0.0841	0.0035	0.0843	0.003	0.0843	0.0024	0.0641	0.0034	0.0796
Chr1	2670001	2680000	0.003	0.0816	0.0033	0.0903	0.0031	0.0758	0.0031	0.0827	0.0032	0.0852	0.0029	0.069
Chr1	2680001	2690000	0.0033	0.0965	0.0029	0.0846	0.0034	0.0901	0.0031	0.0846	0.0028	0.0778	0.0029	0.0744
Chr1	2690001	2700000	0.0028	0.085	0.0027	0.0807	0.0032	0.0826	0.0031	0.0826	0.0025	0.0704	0.0035	0.0874
Chr1	2700001	2710000	0.0033	0.0916	0.0031	0.0877	0.0031	0.0815	0.0029	0.0769	0.0026	0.0681	0.0026	0.0651
Chr1	2710001	2720000	0.0033	0.0894	0.0037	0.1029	0.0041	0.0974	0.0028	0.0791	0.0029	0.0765	0.0029	0.0696
Chr1	2720001	2730000	0.0033	0.0932	0.003	0.0865	0.0032	0.0857	0.0035	0.0982	0.0033	0.0936	0.0036	0.0901
Chr1	2730001	2740000	0.0036	0.0995	0.0034	0.0948	0.0041	0.0992	0.0034	0.091	0.0037	0.0966	0.0036	0.0864
Chr1	2740001	2750000	0.003	0.0916	0.0032	0.0962	0.0034	0.0962	0.003	0.0883	0.0032	0.0923	0.0032	0.0806
Chr1	2750001	2760000	0.0031	0.0935	0.0029	0.089	0.0028	0.0754	0.0035	0.0988	0.0028	0.0805	0.0028	0.0711
Chr1	2760001	2770000	0.0028	0.0845	0.003	0.0864	0.0029	0.0797	0.0031	0.0879	0.0031	0.0874	0.003	0.0797
Chr1	2770001	2780000	0.0029	0.0803	0.0028	0.0789	0.0032	0.0773	0.0026	0.071	0.0028	0.0737	0.0032	0.0733
Chr1	2780001	2790000	0.0029	0.0934	0.0029	0.0933	0.0034	0.0922	0.0028	0.0817	0.003	0.0899	0.0028	0.0751
Chr1	2790001	2800000	0.0033	0.0985	0.0029	0.0815	0.003	0.0793	0.0029	0.0828	0.0032	0.0885	0.0032	0.0809
Chr1	2800001	2810000	0.0035	0.1007	0.0031	0.0877	0.0038	0.0982	0.0031	0.0854	0.0028	0.0791	0.0032	0.0797
Chr1	2810001	2820000	0.0032	0.1037	0.0031	0.095	0.0032	0.0932	0.0029	0.086	0.003	0.0924	0.0032	0.0898
Chr1	2820001	2830000	0.0034	0.1118	0.0034	0.106	0.003	0.0897	0.0031	0.0937	0.003	0.0906	0.0034	0.0936
Chr1	2830001	2840000	0.003	0.0914	0.003	0.0939	0.0033	0.0921	0.003	0.0887	0.0032	0.0917	0.0029	0.0791
Chr1	2840001	2850000	0.0034	0.1015	0.0037	0.1149	0.0038	0.1077	0.0033	0.0893	0.0032	0.0919	0.0032	0.0849
Chr1	2850001	2860000	0.0033	0.0841	0.0032	0.0828	0.0031	0.0739	0.0032	0.0793	0.0033	0.0835	0.003	0.0679
Chr1	2860001	2870000	0.003	0.0849	0.0028	0.0822	0.003	0.0776	0.0035	0.0923	0.003	0.0827	0.0035	0.0869
Chr1	2870001	2880000	0.0031	0.0931	0.0033	0.0934	0.0039	0.1074	0.0027	0.076	0.0028	0.0786	0.003	0.0781
Chr1	2880001	2890000	0.0031	0.0946	0.0032	0.0993	0.004	0.1116	0.0029	0.0879	0.0031	0.09	0.0035	0.0915
Chr1	2890001	2900000	0.0034	0.1108	0.0035	0.1052	0.0035	0.1011	0.0027	0.0788	0.0037	0.1057	0.0033	0.0895
Chr1	2900001	2910000	0.003	0.0974	0.0031	0.1001	0.0035	0.1011	0.0026	0.0776	0.0025	0.0757	0.0027	0.0765
Chr1	2910001	2920000	0.0032	0.1066	0.0033	0.1076	0.0028	0.0869	0.0028	0.0845	0.0033	0.0993	0.0036	0.0972
Chr1	2920001	2930000	0.0111	0.0815	0.0105	0.0811	0.0017	0.0145	0.0015	0.0154	0.0027	0.027	0.002	0.0197
Chr1	2930001	2940000	0.008	0.073	0.0078	0.069	0.0036	0.0306	0.005	0.0502	0.0037	0.0333	0.0038	0.0363
Chr1	2940001	2950000	0.0071	0.0706	0.0078	0.0971	0.0036	0.0335	0.0033	0.0388	0.0021	0.0286	0.0025	0.0262
Chr1	2950001	2960000	0.0089	0.0741	0.0048	0.0444	0.0029	0.0242	0.0028	0.0281	0	0	0.0034	0.0337
Chr1	2960001	2970000	0.0096	0.0745	0.0064	0.0571	0.0044	0.0353	0.0036	0.0369	0	0	0.0019	0.0183
Chr1	2970001	2980000	0.0067	0.0569	0.0032	0.0294	0.0036	0.0311	0.0034	0.0338	0.006	0.0606	0.0032	0.0306
Chr1	2980001	2990000	0.0087	0.0755	0.0152	0.1333	0.0044	0.0346	0.0026	0.025	0	0	0.0022	0.0216
Chr1	2990001	3000000	0.0077	0.0705	0.0017	0.02	0.0027	0.0234	0.0041	0.0394	0.0061	0.0566	0.0038	0.0339
Chr1	3000001	3010000	0.0067	0.0662	0.0098	0.125	0.0029	0.0276	0.0027	0.0296	0.0022	0.0278	0.0029	0.0306
Chr1	3010001	3020000	0.0083	0.0638	0.0085	0.0968	0.0037	0.0314	0.0032	0.0324	0	0	0.0022	0.0209
Chr1	3020001	3030000	0.0083	0.0681	0.0081	0.0833	0.0034	0.0296	0.0033	0.0364	0.003	0.0349	0.0038	0.0394
Chr1	3030001	3040000	0.0101	0.109	0.011	0.1294	0.0059	0.0548	0.0033	0.0368	0.0039	0.0471	0.0032	0.0315
Chr1	3040001	3050000	0.0084	0.0801	0.0057	0.0698	0.0037	0.0318	0.0035	0.0376	0.0021	0.0244	0.003	0.0295
Chr1	3050001	3060000	0.0081	0.0889	0.013	0.1324	0.0041	0.0404	0.0043	0.0481	0.006	0.0615	0.0064	0.0634
Chr1	3060001	3070000	0.0124	0.0916	0.0072	0.0781	0.0041	0.0367	0.0026	0.0288	0.0026	0.0308	0.0021	0.0216
Chr1	3070001	3080000	0.0081	0.0692	0.0042	0.0465	0.0026	0.0219	0.0013	0.0138	0.0018	0.0227	0.0023	0.0236
Chr1	3080001	3090000	0.0099	0.079	0.0099	0.1	0.0032	0.0265	0.002	0.0165	0.0068	0.0667	0.0024	0.0223
Chr1	3090001	3100000	0.004	0.1057	0.0037	0.1085	0.0039	0.0831	0.0034	0.0921	0.0031	0.0862	0.0034	0.0702
Chr1	3100001	3110000	0.0033	0.1063	0.0027	0.0924	0.0033	0.0998	0.0034	0.0995	0.0027	0.0822	0.0038	0.1022
Chr1	3110001	3120000	0.003	0.1002	0.003	0.0988	0.003	0.0944	0.0024	0.0743	0.0034	0.1008	0.0029	0.0826
Chr1	3120001	3130000	0.0034	0.1091	0.0031	0.0978	0.0032	0.0944	0.0026	0.0764	0.0028	0.0819	0.003	0.0833
Chr1	3130001	3140000	0.0034	0.1143	0.003	0.0972	0.0033	0.1051	0.0022	0.0707	0.0024	0.0763	0.0032	0.0945
Chr1	3140001	3150000	0.0035	0.1132	0.0034	0.1112	0.0035	0.1048	0.003	0.0863	0.0029	0.085	0.0032	0.0874
Chr1	3150001	3160000	0.0031	0.0971	0.0031	0.0949	0.0034	0.0935	0.003	0.0837	0.0035	0.0928	0.0033	0.0807
Chr1	3160001	3170000	0.0036	0.1134	0.0028	0.0892	0.0036	0.1053	0.0031	0.0959	0.0036	0.1105	0.0032	0.0894
Chr1	3170001	3180000	0.0029	0.0877	0.0027	0.082	0.0035	0.0995	0.0033	0.0931	0.0033	0.0924	0.0036	0.093
Chr1	3180001	3190000	0.0028	0.0841	0.0028	0.0856	0.003	0.0874	0.0031	0.0895	0.0028	0.083	0.0031	0.0819
Chr1	3190001	3200000	0.0028	0.0722	0.0033	0.0841	0.0031	0.0726	0.0029	0.0733	0.0029	0.0691	0.0029	0.065
Chr1	3200001	3210000	0.0036	0.1056	0.0034	0.1018	0.0035	0.0972	0.0029	0.0832	0.0026	0.0702	0.0031	0.0783
Chr1	3210001	3220000	0.003	0.0971	0.0027	0.0839	0.0034	0.0967	0.0028	0.086	0.0025	0.0725	0.003	0.079
Chr1	3220001	3230000	0.0032	0.0926	0.0039	0.1073	0.0038	0.102	0.003	0.0841	0.003	0.0813	0.0029	0.0754
Chr1	3230001	3240000	0.0031	0.0862	0.0033	0.0941	0.0031	0.0801	0.0029	0.0835	0.0035	0.095	0.0032	0.0816
Chr1	3240001	3250000	0.003	0.0886	0.003	0.0868	0.0035	0.0977	0.0031	0.0866	0.0032	0.0868	0.0031	0.0839
Chr1	3250001	3260000	0.0039	0.1081	0.0035	0.0972	0.0035	0.0885	0.0037	0.0999	0.0034	0.0877	0.0034	0.0822
Chr1	3260001	3270000	0.0035	0.0895	0.0035	0.0911	0.0035	0.0857	0.0034	0.0888	0.0037	0.0899	0.004	0.0929
Chr1	3270001	3280000	0.003	0.0888	0.0034	0.0969	0.0031	0.0792	0.0037	0.1013	0.0033	0.0863	0.0037	0.0837
Chr1	3280001	3290000	0.0029	0.0883	0.0036	0.1056	0.0036	0.1007	0.003	0.0832	0.0033	0.0962	0.0031	0.0793
Chr1	3290001	3300000	0.0029	0.0919	0.0031	0.0986	0.0027	0.0794	0.0029	0.0881	0.0029	0.0858	0.0026	0.0707
Chr1	3300001	3310000	0.0026	0.0751	0.003	0.0914	0.0033	0.0902	0.0029	0.084	0.003	0.0796	0.0033	0.0878
Chr1	3310001	3320000	0.0029	0.0862	0.0028	0.0833	0.0034	0.0977	0.003	0.0886	0.0028	0.0866	0.003	0.0858
Chr1	3320001	3330000	0.003	0.0843	0.003	0.0829	0.0033	0.0765	0.0033	0.0869	0.0032	0.082	0.0034	0.0763
Chr1	3330001	3340000	0.0033	0.0915	0.0035	0.0962	0.0033	0.0891	0.0035	0.0933	0.0036	0.0985	0.0042	0.1049
Chr1	3340001	3350000	0.0032	0.0929	0.0023	0.0637	0.0029	0.0775	0.0028	0.0751	0.0025	0.069	0.0025	0.0627
Chr1	3350001	3360000	0.0033	0.0876	0.0037	0.0976	0.0031	0.0737	0.0033	0.0848	0.0037	0.0941	0.0033	0.0749
Chr1	3360001	3370000	0.0027	0.0673	0.0026	0.0695	0.003	0.0734	0.0035	0.0883	0.0037	0.0924	0.0035	0.0821
Chr1	3370001	3380000	0.0028	0.0774	0.0031	0.0849	0.0031	0.0794	0.0026	0.0755	0.0025	0.0735	0.0029	0.077
Chr1	3380001	3390000	0.0028	0.0755	0.0033	0.0872	0.0033	0.0774	0.0033	0.0794	0.0035	0.0869	0.0034	0.0774
Chr1	3390001	3400000	0.0034	0.0967	0.0031	0.0863	0.0041	0.1085	0.0027	0.0744	0.0032	0.0903	0.0029	0.0746
Chr1	3400001	3410000	0.003	0.0872	0.0036	0.1063	0.0029	0.0807	0.0028	0.0819	0.0035	0.0953	0.0028	0.0721
Chr1	3410001	3420000	0.0034	0.091	0.0028	0.0781	0.0034	0.0847	0.0028	0.0739	0.0038	0.1005	0.0037	0.0911
Chr1	3420001	3430000	0.0038	0.1046	0.0045	0.122	0.0039	0.0912	0.004	0.1048	0.0031	0.0835	0.0039	0.0877
Chr1	3430001	3440000	0.0032	0.0904	0.0028	0.0775	0.0036	0.0932	0.0029	0.0762	0.003	0.0813	0.003	0.0784
Chr1	3440001	3450000	0.0033	0.0917	0.0033	0.0904	0.0035	0.0857	0.0028	0.0752	0.0025	0.065	0.0033	0.076
Chr1	3450001	3460000	0.0035	0.097	0.0031	0.0854	0.003	0.076	0.0033	0.089	0.0032	0.0851	0.0036	0.0886
Chr1	3460001	3470000	0.003	0.0794	0.0029	0.0806	0.0037	0.0904	0.0031	0.0839	0.003	0.0835	0.0027	0.0692
Chr1	3470001	3480000	0.0033	0.0863	0.0026	0.074	0.0037	0.0883	0.0029	0.0747	0.0029	0.0754	0.003	0.0705
Chr1	3480001	3490000	0.0035	0.0952	0.0041	0.1161	0.0038	0.0971	0.0037	0.0996	0.0034	0.0944	0.0037	0.093
Chr1	3490001	3500000	0.0039	0.1164	0.0027	0.0833	0.0034	0.0935	0.003	0.0863	0.0032	0.09	0.003	0.0778
Chr1	3500001	3510000	0.0035	0.1045	0.0033	0.102	0.0034	0.0946	0.0031	0.0896	0.0035	0.0966	0.0039	0.1044
Chr1	3510001	3520000	0.0028	0.0841	0.0033	0.0962	0.0033	0.0848	0.0031	0.0909	0.0027	0.0749	0.0034	0.0774
Chr1	3520001	3530000	0.0026	0.0731	0.0027	0.0765	0.003	0.0781	0.0029	0.0813	0.0034	0.0914	0.003	0.0782
Chr1	3530001	3540000	0.0036	0.0958	0.0026	0.0714	0.004	0.0954	0.0033	0.0848	0.0035	0.0932	0.0031	0.0726
Chr1	3540001	3550000	0.0029	0.0896	0.0036	0.103	0.0035	0.0956	0.0027	0.0765	0.0032	0.0889	0.0032	0.0805
Chr1	3550001	3560000	0.0032	0.096	0.0035	0.1014	0.0038	0.0986	0.0029	0.0815	0.0032	0.0874	0.0031	0.0739
Chr1	3560001	3570000	0.0029	0.0918	0.0028	0.09	0.0031	0.095	0.0028	0.0834	0.0031	0.0933	0.0031	0.0881
Chr1	3570001	3580000	0.0032	0.0907	0.0039	0.102	0.0037	0.0887	0.0027	0.0719	0.0031	0.0787	0.0036	0.0829
Chr1	3580001	3590000	0.003	0.0884	0.0031	0.0897	0.0031	0.0778	0.0032	0.085	0.0032	0.0899	0.0027	0.0644
Chr1	3590001	3600000	0.003	0.0753	0.0033	0.0856	0.0033	0.0774	0.0027	0.0711	0.0027	0.07	0.0027	0.0626
Chr1	3600001	3610000	0.0031	0.1006	0.0025	0.0804	0.0031	0.0889	0.0031	0.0935	0.0032	0.0987	0.0031	0.0885
Chr1	3610001	3620000	0.003	0.0892	0.0032	0.0926	0.0034	0.0928	0.0035	0.0972	0.0037	0.1011	0.0035	0.0918
Chr1	3620001	3630000	0.0028	0.0855	0.0031	0.093	0.003	0.0839	0.0033	0.0946	0.0031	0.0864	0.0029	0.0731
Chr1	3630001	3640000	0.0026	0.0801	0.0034	0.1023	0.0029	0.0821	0.0023	0.0706	0.003	0.0852	0.0033	0.0866
Chr1	3640001	3650000	0.0027	0.0776	0.003	0.0882	0.0034	0.0908	0.0029	0.0781	0.0027	0.0733	0.0033	0.081
Chr1	3650001	3660000	0.0041	0.1257	0.0045	0.1302	0.004	0.1076	0.0027	0.0774	0.0031	0.0928	0.0033	0.0898
Chr1	3660001	3670000	0.003	0.0856	0.0027	0.0768	0.0035	0.0922	0.003	0.0834	0.0029	0.0786	0.003	0.0763
Chr1	3670001	3680000	0.0031	0.0967	0.0027	0.0869	0.0041	0.1189	0.0025	0.0718	0.0028	0.0833	0.0027	0.0751
Chr1	3680001	3690000	0.0033	0.0926	0.0031	0.0905	0.0032	0.0866	0.003	0.0861	0.004	0.1094	0.0033	0.0848
Chr1	3690001	3700000	0.0028	0.0772	0.0033	0.0966	0.0031	0.0799	0.0026	0.0697	0.0024	0.0637	0.0029	0.0682
Chr1	3700001	3710000	0.0028	0.0841	0.0029	0.0876	0.0036	0.0981	0.0026	0.0707	0.0034	0.0921	0.0032	0.0807
Chr1	3710001	3720000	0.0031	0.0937	0.0034	0.1064	0.003	0.0866	0.0026	0.0779	0.0029	0.0823	0.0028	0.0771
Chr1	3720001	3730000	0.0043	0.1264	0.004	0.1151	0.0034	0.0987	0.0025	0.0708	0.0032	0.089	0.0032	0.0845
Chr1	3730001	3740000	0.0041	0.1262	0.0041	0.1462	0.004	0.0935	0.0028	0.0857	0.0031	0.1087	0.0028	0.0631
Chr1	3740001	3750000	0.0273	0.2028	0.0055	0.0606	0.0044	0.0379	0.003	0.0308	0.0026	0.0294	0.0032	0.0308
Chr1	3750001	3760000	0.0053	0.1478	0.0043	0.1438	0.0041	0.0921	0.0026	0.072	0.0026	0.0825	0.0024	0.0539
Chr1	3760001	3770000	0.0043	0.1162	0.0031	0.0973	0.0029	0.0751	0.0032	0.0905	0.0031	0.0973	0.0031	0.0732
Chr1	3770001	3780000	0.0026	0.0685	0.0032	0.0856	0.0031	0.0778	0.0036	0.0959	0.0035	0.0958	0.0033	0.0794
Chr1	3780001	3790000	0.0031	0.085	0.0036	0.1093	0.0037	0.0963	0.0029	0.0722	0.0027	0.0781	0.0033	0.0791
Chr1	3790001	3800000	0.0035	0.0901	0.0038	0.1011	0.004	0.0947	0.0028	0.073	0.0033	0.0803	0.0031	0.0733
Chr1	3800001	3810000	0.0031	0.0844	0.0032	0.087	0.0041	0.0947	0.003	0.0773	0.0029	0.0763	0.0032	0.0755
Chr1	3810001	3820000	0.0028	0.0866	0.0031	0.0921	0.0035	0.0944	0.0026	0.0748	0.0031	0.0849	0.003	0.078
Chr1	3820001	3830000	0.0039	0.1181	0.004	0.1121	0.0036	0.0995	0.0029	0.0808	0.0036	0.0965	0.0032	0.0779
Chr1	3830001	3840000	0.003	0.0837	0.0029	0.0858	0.0031	0.0835	0.003	0.0775	0.0035	0.0931	0.0029	0.0722
Chr1	3840001	3850000	0.0037	0.1035	0.003	0.085	0.0039	0.1011	0.0028	0.0787	0.0027	0.0733	0.003	0.0735
Chr1	3850001	3860000	0.0032	0.0933	0.0028	0.0822	0.0028	0.0715	0.0031	0.0855	0.0028	0.0781	0.0033	0.0783
Chr1	3860001	3870000	0.003	0.0873	0.0028	0.0834	0.003	0.0763	0.0037	0.1	0.0032	0.0879	0.0036	0.0856
Chr1	3870001	3880000	0.0029	0.0885	0.003	0.0884	0.003	0.0845	0.0028	0.0798	0.0032	0.0865	0.0032	0.0801
Chr1	3880001	3890000	0.0029	0.0852	0.0031	0.0901	0.0025	0.0668	0.0029	0.0795	0.0025	0.0682	0.0033	0.0792
Chr1	3890001	3900000	0.003	0.0811	0.0035	0.0962	0.0037	0.094	0.0028	0.0741	0.0028	0.0749	0.0031	0.0781
Chr1	3900001	3910000	0.0033	0.0987	0.0039	0.1064	0.0038	0.1029	0.0027	0.0734	0.0034	0.0988	0.0032	0.0834
Chr1	3910001	3920000	0.0031	0.0912	0.0038	0.1177	0.0033	0.0944	0.0028	0.0816	0.0032	0.0853	0.0026	0.0693
Chr1	3920001	3930000	0.0025	0.0772	0.0027	0.0827	0.0028	0.0813	0.0034	0.1036	0.0039	0.1154	0.0036	0.0997
Chr1	3930001	3940000	0.003	0.0828	0.0033	0.0909	0.0029	0.0702	0.0028	0.075	0.003	0.0816	0.0032	0.0742
Chr1	3940001	3950000	0.0034	0.1006	0.0034	0.1003	0.0034	0.097	0.0029	0.0872	0.0028	0.0825	0.0031	0.0843
Chr1	3950001	3960000	0.0036	0.0996	0.0039	0.1145	0.0037	0.0975	0.0046	0.1244	0.0036	0.0965	0.0046	0.107
Chr1	3960001	3970000	0.0036	0.0945	0.0035	0.0898	0.0036	0.0824	0.0027	0.0679	0.0029	0.0662	0.003	0.0614
Chr1	3970001	3980000	0.0028	0.0865	0.0028	0.0885	0.0028	0.0765	0.0032	0.0956	0.0025	0.0721	0.0031	0.0806
Chr1	3980001	3990000	0.003	0.0866	0.0035	0.0997	0.003	0.0802	0.0033	0.0928	0.0027	0.0757	0.0034	0.0857
Chr1	3990001	4000000	0.0032	0.0889	0.0031	0.0846	0.0032	0.0866	0.003	0.0805	0.0034	0.09	0.0032	0.083
Chr1	4000001	4010000	0.0029	0.0882	0.0028	0.0833	0.0033	0.0822	0.0031	0.0776	0.0035	0.089	0.0032	0.0737
Chr1	4010001	4020000	0.0039	0.1094	0.0036	0.0942	0.004	0.099	0.0036	0.0926	0.003	0.0755	0.0029	0.0704
Chr1	4020001	4030000	0.0034	0.0965	0.0035	0.0972	0.0032	0.0779	0.0024	0.0681	0.0023	0.0609	0.003	0.0738
Chr1	4030001	4040000	0.0027	0.0815	0.0028	0.0831	0.0032	0.087	0.0029	0.0853	0.0027	0.0761	0.0031	0.0788
Chr1	4040001	4050000	0.0032	0.0821	0.0027	0.074	0.003	0.072	0.0034	0.0867	0.0032	0.078	0.0031	0.0731
Chr1	4050001	4060000	0.0039	0.1119	0.0039	0.1115	0.0041	0.1133	0.0029	0.0848	0.0029	0.0789	0.0037	0.0921
Chr1	4060001	4070000	0.0029	0.0814	0.0031	0.0875	0.0034	0.0883	0.0033	0.0879	0.0029	0.0813	0.0033	0.082
Chr1	4070001	4080000	0.0033	0.0978	0.003	0.0909	0.0032	0.081	0.004	0.1033	0.0033	0.0913	0.0043	0.1049
Chr1	4080001	4090000	0.003	0.0823	0.0029	0.0816	0.003	0.0752	0.0034	0.0909	0.0034	0.0888	0.0035	0.0816
Chr1	4090001	4100000	0.003	0.0876	0.003	0.0886	0.0032	0.0844	0.0033	0.0941	0.0031	0.0852	0.0034	0.0828
Chr1	4100001	4110000	0.0042	0.1139	0.0036	0.1073	0.0037	0.0982	0.0035	0.0929	0.0033	0.0897	0.0033	0.0789
Chr1	4110001	4120000	0.0031	0.0906	0.0034	0.0981	0.0032	0.0851	0.0036	0.1019	0.0032	0.0896	0.0033	0.0825
Chr1	4120001	4130000	0.0027	0.0791	0.0031	0.0911	0.0031	0.0804	0.0028	0.0763	0.0032	0.092	0.0028	0.0728
Chr1	4130001	4140000	0.0031	0.0878	0.003	0.085	0.0028	0.0722	0.0029	0.0779	0.0031	0.085	0.0031	0.0756
Chr1	4140001	4150000	0.0028	0.0849	0.003	0.0844	0.0031	0.0817	0.0029	0.0825	0.003	0.0834	0.0034	0.0836
Chr1	4150001	4160000	0.0034	0.1027	0.0032	0.0954	0.0036	0.0991	0.0022	0.0667	0.0031	0.0926	0.0031	0.0805
Chr1	4160001	4170000	0.003	0.0827	0.0033	0.0907	0.0039	0.0983	0.0035	0.0906	0.0034	0.0866	0.0035	0.0778
Chr1	4170001	4180000	0.0032	0.0872	0.0032	0.0856	0.0028	0.0736	0.0034	0.0883	0.0033	0.0824	0.0036	0.0846
Chr1	4180001	4190000	0.0035	0.1116	0.0036	0.1099	0.0033	0.1004	0.0028	0.0818	0.0028	0.0781	0.0028	0.0741
Chr1	4190001	4200000	0.003	0.096	0.0033	0.1063	0.0033	0.0998	0.0024	0.0722	0.0025	0.0732	0.0029	0.0795
Chr1	4200001	4210000	0.0032	0.0957	0.0035	0.0995	0.0035	0.0942	0.003	0.0846	0.0035	0.1006	0.0035	0.0881
Chr1	4210001	4220000	0.0027	0.0813	0.0028	0.0846	0.0031	0.0862	0.0032	0.0865	0.0033	0.0843	0.003	0.0754
Chr1	4220001	4230000	0.0032	0.0992	0.0037	0.1094	0.0035	0.0996	0.0033	0.0911	0.0039	0.1048	0.0035	0.0898
Chr1	4230001	4240000	0.0026	0.0794	0.0036	0.1118	0.0037	0.1048	0.003	0.0894	0.0033	0.0966	0.0032	0.0864
Chr1	4240001	4250000	0.0028	0.0782	0.0036	0.0947	0.0033	0.0767	0.003	0.0782	0.0029	0.0731	0.0025	0.0565
Chr1	4250001	4260000	0.0043	0.124	0.0031	0.0915	0.0036	0.0927	0.0026	0.0809	0.003	0.0888	0.0035	0.0858
Chr1	4260001	4270000	0.0237	0.3219	0.0064	0.1683	0.0043	0.0993	0.0033	0.0796	0.0025	0.0738	0.0032	0.0727
Chr1	4270001	4280000	0.0275	0.319	0.0064	0.1503	0.0049	0.0881	0.0028	0.0597	0.0039	0.1081	0.0033	0.0569
Chr1	4280001	4290000	0.0082	0.1475	0.0035	0.1077	0.0036	0.0923	0.0031	0.0843	0.0029	0.0824	0.0032	0.0761
Chr1	4290001	4300000	0.0032	0.0873	0.0032	0.0868	0.0033	0.0848	0.0031	0.085	0.003	0.0858	0.0036	0.0886
Chr1	4300001	4310000	0.0031	0.0786	0.003	0.0787	0.0035	0.082	0.0034	0.0846	0.0029	0.071	0.0032	0.0707
Chr1	4310001	4320000	0.0031	0.0924	0.0033	0.0978	0.0035	0.088	0.0034	0.0943	0.003	0.0783	0.0031	0.0756
Chr1	4320001	4330000	0.0034	0.0966	0.0028	0.0795	0.0029	0.0725	0.003	0.0819	0.0028	0.075	0.0034	0.0796
Chr1	4330001	4340000	0.0033	0.0846	0.0027	0.0668	0.0028	0.0628	0.0027	0.0661	0.0026	0.062	0.0027	0.0574
Chr1	4340001	4350000	0.0035	0.1098	0.0033	0.1027	0.0038	0.1069	0.0026	0.0778	0.003	0.0904	0.0032	0.0894
Chr1	4350001	4360000	0.0029	0.0784	0.0031	0.0859	0.0033	0.0814	0.0028	0.072	0.0033	0.0858	0.0032	0.0768
Chr1	4360001	4370000	0.0031	0.0908	0.0036	0.1101	0.0033	0.0871	0.0029	0.0828	0.0029	0.0823	0.0028	0.0689
Chr1	4370001	4380000	0.0034	0.0997	0.0033	0.0929	0.0032	0.0893	0.0029	0.0815	0.0031	0.0879	0.0026	0.0685
Chr1	4380001	4390000	0.0032	0.0839	0.003	0.0773	0.0033	0.0784	0.0031	0.0779	0.0032	0.0805	0.0034	0.0747
Chr1	4390001	4400000	0.0031	0.0947	0.0031	0.0932	0.0031	0.0807	0.0028	0.0834	0.0033	0.085	0.0027	0.0687
Chr1	4400001	4410000	0.0026	0.07	0.0027	0.0757	0.0029	0.0743	0.0026	0.069	0.0024	0.0589	0.0032	0.0743
Chr1	4410001	4420000	0.0055	0.1247	0.0034	0.099	0.0031	0.0666	0.0024	0.06	0.003	0.0809	0.0029	0.0627
Chr1	4420001	4430000	0.0345	0.3262	0.0315	0.3043	0.0043	0.0511	0.0043	0.054	0.0029	0.0431	0.0041	0.0506
Chr1	4430001	4440000	0.0367	0.3074	0.0167	0.2	0.0051	0.0542	0.0029	0.038	0.0018	0.025	0.0029	0.032
Chr1	4440001	4450000	0.0397	0.3406	0.0273	0.2828	0.0074	0.0754	0.0047	0.0589	0.0023	0.03	0.0025	0.0278
Chr1	4450001	4460000	0.0375	0.3709	0.0199	0.264	0.0043	0.0618	0.0024	0.0339	0.0021	0.0308	0.0027	0.0361
Chr1	4460001	4470000	0.004	0.1046	0.0032	0.0881	0.0034	0.0747	0.0029	0.0748	0.0026	0.0663	0.003	0.0603
Chr1	4470001	4480000	0.0034	0.0935	0.0033	0.0911	0.0034	0.0767	0.0033	0.0847	0.0029	0.0733	0.0035	0.0759
Chr1	4480001	4490000	0.0036	0.1016	0.003	0.0866	0.0033	0.0819	0.0032	0.087	0.0033	0.0905	0.0034	0.0847
Chr1	4490001	4500000	0.0027	0.0785	0.0031	0.0867	0.0028	0.0699	0.0028	0.0764	0.0028	0.0739	0.0034	0.0798
Chr1	4500001	4510000	0.0027	0.0714	0.003	0.0761	0.0034	0.0826	0.0033	0.0806	0.003	0.0771	0.0034	0.0759
Chr1	4510001	4520000	0.0031	0.0837	0.0032	0.0891	0.0036	0.0895	0.0028	0.0715	0.0031	0.083	0.0028	0.0668
Chr1	4520001	4530000	0.0031	0.0907	0.0029	0.0826	0.0033	0.0841	0.0031	0.0855	0.0029	0.0784	0.0029	0.0697
Chr1	4530001	4540000	0.0033	0.0924	0.0037	0.1054	0.0042	0.1063	0.0031	0.086	0.0032	0.0868	0.0028	0.0674
Chr1	4540001	4550000	0.0035	0.1093	0.0032	0.0894	0.0036	0.1019	0.0035	0.1005	0.0038	0.1106	0.0039	0.1011
Chr1	4550001	4560000	0.0037	0.1052	0.0037	0.107	0.004	0.1027	0.003	0.0802	0.0029	0.0795	0.0033	0.0837
Chr1	4560001	4570000	0.0036	0.1008	0.0038	0.1001	0.0038	0.0987	0.0029	0.077	0.003	0.0774	0.0029	0.0735
Chr1	4570001	4580000	0.003	0.0772	0.0027	0.0722	0.0028	0.0669	0.0031	0.0759	0.0028	0.0753	0.0032	0.0734
Chr1	4580001	4590000	0.0037	0.1127	0.0031	0.0953	0.0034	0.0895	0.0026	0.075	0.0025	0.0731	0.003	0.0766
Chr1	4590001	4600000	0.0037	0.1088	0.0037	0.1052	0.0035	0.0961	0.0025	0.0682	0.0025	0.07	0.0028	0.0733
Chr1	4600001	4610000	0.0028	0.0867	0.0034	0.101	0.0038	0.1086	0.0028	0.0795	0.0024	0.0694	0.0028	0.0762
Chr1	4610001	4620000	0.0029	0.0882	0.0035	0.108	0.003	0.0881	0.0031	0.0862	0.0037	0.1071	0.0033	0.0883
Chr1	4620001	4630000	0.0035	0.0953	0.0033	0.0846	0.0033	0.0737	0.0033	0.0838	0.0024	0.0645	0.0032	0.0714
Chr1	4630001	4640000	0.0026	0.0745	0.0034	0.095	0.0034	0.0859	0.0031	0.0851	0.0029	0.0791	0.003	0.0703
Chr1	4640001	4650000	0.0033	0.0955	0.0035	0.1036	0.0036	0.095	0.0035	0.1	0.0038	0.1068	0.0033	0.0867
Chr1	4650001	4660000	0.0033	0.0953	0.0038	0.1111	0.0037	0.0935	0.0027	0.0719	0.0029	0.0745	0.0032	0.0712
Chr1	4660001	4670000	0.0034	0.0857	0.0035	0.088	0.0029	0.0656	0.003	0.0806	0.003	0.0792	0.0032	0.0725
Chr1	4670001	4680000	0.0032	0.095	0.0033	0.0985	0.0033	0.0851	0.0031	0.0879	0.0031	0.0888	0.0031	0.0758
Chr1	4680001	4690000	0.0028	0.0794	0.003	0.0892	0.003	0.0798	0.0029	0.0751	0.0033	0.0874	0.0031	0.0741
Chr1	4690001	4700000	0.0027	0.0882	0.0022	0.0737	0.0029	0.0897	0.0024	0.075	0.0031	0.0921	0.0027	0.0792
Chr1	4700001	4710000	0.0029	0.0832	0.003	0.0868	0.0035	0.0872	0.0031	0.0838	0.003	0.0848	0.0033	0.0808
Chr1	4710001	4720000	0.0031	0.0903	0.0035	0.1006	0.0033	0.0882	0.0035	0.0978	0.003	0.0822	0.0034	0.084
Chr1	4720001	4730000	0.0038	0.106	0.0037	0.1001	0.0042	0.1037	0.0028	0.0744	0.0027	0.0738	0.0029	0.0675
Chr1	4730001	4740000	0.0034	0.0891	0.0036	0.0897	0.0038	0.0849	0.0023	0.0595	0.0026	0.0655	0.0028	0.0639
Chr1	4740001	4750000	0.003	0.09	0.0032	0.0902	0.0031	0.0797	0.0032	0.0925	0.0027	0.0733	0.0034	0.0875
Chr1	4750001	4760000	0.0035	0.1027	0.0032	0.0855	0.0035	0.0937	0.0031	0.0853	0.0029	0.0785	0.0027	0.0704
Chr1	4760001	4770000	0.0036	0.1044	0.0034	0.1029	0.0036	0.099	0.0029	0.079	0.0028	0.0807	0.0029	0.072
Chr1	4770001	4780000	0.0027	0.074	0.003	0.0835	0.003	0.0737	0.0033	0.091	0.0033	0.0848	0.0026	0.0617
Chr1	4780001	4790000	0.0033	0.1024	0.0033	0.1013	0.0031	0.0858	0.0027	0.0829	0.0032	0.0936	0.0033	0.0855
Chr1	4790001	4800000	0.0037	0.0944	0.003	0.0793	0.0037	0.0854	0.0026	0.0688	0.0042	0.1018	0.003	0.0683
Chr1	4800001	4810000	0.0034	0.0867	0.0032	0.0812	0.0031	0.0705	0.0031	0.0784	0.0028	0.0691	0.0032	0.0704
Chr1	4810001	4820000	0.0064	0.1257	0.0037	0.1095	0.0027	0.0753	0.0028	0.0845	0.0031	0.0914	0.0034	0.089
Chr1	4820001	4830000	0.0031	0.091	0.0028	0.0806	0.0027	0.0709	0.0034	0.0924	0.0033	0.0897	0.0036	0.0877
Chr1	4830001	4840000	0.0036	0.1017	0.003	0.0839	0.0041	0.105	0.0027	0.0736	0.0027	0.072	0.0029	0.0719
Chr1	4840001	4850000	0.0033	0.0945	0.0031	0.0897	0.0038	0.0943	0.0034	0.0971	0.0036	0.0996	0.0036	0.0921
Chr1	4850001	4860000	0.0024	0.0791	0.0024	0.0762	0.0033	0.084	0.0031	0.0894	0.0029	0.0863	0.0035	0.0846
Chr1	4860001	4870000	0.0027	0.0845	0.003	0.0928	0.0033	0.0919	0.0031	0.0876	0.0028	0.0807	0.003	0.0817
Chr1	4870001	4880000	0.0036	0.0866	0.0031	0.0806	0.003	0.075	0.0036	0.0926	0.0035	0.0963	0.0032	0.0785
Chr1	4880001	4890000	0.0087	0.1438	0.0037	0.093	0.0039	0.0602	0.003	0.0575	0.0026	0.054	0.0026	0.0409
Chr1	4890001	4900000	0.0031	0.0848	0.0046	0.094	0.0034	0.0868	0.0027	0.0734	0.0035	0.0892	0.0035	0.0854
Chr1	4900001	4910000	0.003	0.0847	0.0026	0.0738	0.0035	0.0877	0.0027	0.0719	0.0031	0.0801	0.0029	0.0726
Chr1	4910001	4920000	0.0028	0.0735	0.0032	0.0822	0.0029	0.067	0.0021	0.0498	0.0029	0.0647	0.0026	0.0546
Chr1	4920001	4930000	0.0041	0.1113	0.0032	0.084	0.004	0.098	0.0028	0.0712	0.0026	0.0666	0.003	0.0686
Chr1	4930001	4940000	0.0032	0.0829	0.003	0.0751	0.0035	0.0773	0.003	0.0764	0.0025	0.0636	0.003	0.0669
Chr1	4940001	4950000	0.0024	0.0754	0.003	0.0876	0.003	0.0798	0.0027	0.0781	0.0034	0.0909	0.0029	0.0728
Chr1	4950001	4960000	0.0028	0.0848	0.0031	0.0929	0.0032	0.0917	0.0034	0.096	0.003	0.0869	0.0038	0.1042
Chr1	4960001	4970000	0.003	0.0872	0.0027	0.0783	0.0033	0.0846	0.003	0.0803	0.0031	0.0794	0.0031	0.075
Chr1	4970001	4980000	0.0035	0.1073	0.0033	0.103	0.0034	0.0996	0.0026	0.0772	0.0026	0.0733	0.003	0.0815
Chr1	4980001	4990000	0.0031	0.0832	0.0029	0.0808	0.0034	0.0863	0.0027	0.0694	0.0028	0.0712	0.0033	0.0828
Chr1	4990001	5000000	0.0036	0.0972	0.0029	0.0845	0.0039	0.0965	0.0029	0.0796	0.0033	0.0853	0.0032	0.0716
Chr1	5000001	5010000	0.0028	0.0758	0.0031	0.0891	0.0031	0.0816	0.0027	0.0728	0.0026	0.0716	0.0032	0.0801
Chr1	5010001	5020000	0.0028	0.0762	0.003	0.079	0.0031	0.0729	0.0035	0.0888	0.0041	0.1006	0.0039	0.0859
Chr1	5020001	5030000	0.0031	0.087	0.0034	0.0964	0.0034	0.0919	0.0025	0.0709	0.0029	0.0841	0.0031	0.0814
Chr1	5030001	5040000	0.0029	0.0811	0.0035	0.1007	0.0036	0.0966	0.0033	0.0874	0.0031	0.0872	0.0031	0.0814
Chr1	5040001	5050000	0.0027	0.0885	0.003	0.1016	0.0032	0.1016	0.0034	0.1093	0.0029	0.0933	0.0031	0.0949
Chr1	5050001	5060000	0.0031	0.0958	0.0031	0.0955	0.0037	0.1042	0.0024	0.0732	0.0029	0.0847	0.0028	0.077
Chr1	5060001	5070000	0.0025	0.0747	0.0028	0.0839	0.0031	0.0896	0.0026	0.076	0.0029	0.0831	0.0032	0.0875
Chr1	5070001	5080000	0.0027	0.0845	0.0032	0.099	0.0032	0.0912	0.0026	0.0759	0.0027	0.0769	0.0031	0.0823
Chr1	5080001	5090000	0.0034	0.1048	0.0032	0.1024	0.0037	0.1097	0.0028	0.0847	0.0031	0.0911	0.0032	0.0882
Chr1	5090001	5100000	0.0027	0.0893	0.0032	0.1053	0.0033	0.0984	0.0032	0.0968	0.0026	0.0788	0.0027	0.0764
Chr1	5100001	5110000	0.0036	0.1135	0.003	0.0924	0.0035	0.0997	0.0036	0.1036	0.0029	0.0819	0.0032	0.0824
Chr1	5110001	5120000	0.0031	0.1025	0.0028	0.0925	0.0032	0.0947	0.0026	0.0768	0.0022	0.0668	0.003	0.0802
Chr1	5120001	5130000	0.0028	0.0872	0.0032	0.0942	0.0031	0.0878	0.0025	0.0721	0.0028	0.0827	0.0032	0.0854
Chr1	5130001	5140000	0.0026	0.0796	0.0032	0.0908	0.0031	0.0845	0.0027	0.079	0.0027	0.078	0.0034	0.0888
Chr1	5140001	5150000	0.0034	0.0937	0.0037	0.1048	0.0038	0.0989	0.0035	0.0953	0.0038	0.0997	0.0033	0.0818
Chr1	5150001	5160000	0.0036	0.1154	0.0028	0.0842	0.0031	0.0872	0.002	0.0595	0.0023	0.067	0.0029	0.0803
Chr1	5160001	5170000	0.0032	0.1007	0.0028	0.0881	0.0034	0.0974	0.0033	0.0926	0.0037	0.1049	0.0034	0.0826
Chr1	5170001	5180000	0.0035	0.1027	0.003	0.0882	0.0031	0.0828	0.0027	0.0737	0.0029	0.0814	0.0036	0.0922
Chr1	5180001	5190000	0.0032	0.0902	0.0031	0.0857	0.0029	0.0687	0.0032	0.0837	0.0027	0.0758	0.0028	0.0658
Chr1	5190001	5200000	0.0028	0.0856	0.0033	0.0917	0.0034	0.0907	0.0029	0.0851	0.0035	0.0938	0.0029	0.0759
Chr1	5200001	5210000	0.0035	0.0956	0.0029	0.088	0.0034	0.0912	0.0024	0.068	0.0029	0.0799	0.0029	0.0718
Chr1	5210001	5220000	0.0032	0.0954	0.003	0.085	0.0035	0.0889	0.0028	0.0765	0.0025	0.0737	0.0028	0.0705
Chr1	5220001	5230000	0.0031	0.09	0.003	0.0859	0.0032	0.0807	0.0027	0.0757	0.0028	0.0766	0.0029	0.0685
Chr1	5230001	5240000	0.0027	0.0849	0.0033	0.1064	0.0031	0.0912	0.0023	0.069	0.0031	0.0882	0.0033	0.0874
Chr1	5240001	5250000	0.0034	0.1037	0.0029	0.0862	0.0034	0.0927	0.0023	0.0705	0.003	0.0834	0.0027	0.069
Chr1	5250001	5260000	0.0031	0.0959	0.0031	0.0962	0.0029	0.0875	0.0027	0.0773	0.0029	0.0845	0.0032	0.0846
Chr1	5260001	5270000	0.0037	0.1083	0.0033	0.1018	0.0036	0.1009	0.0032	0.0918	0.0028	0.0786	0.0034	0.0853
Chr1	5270001	5280000	0.0027	0.0833	0.0031	0.0964	0.003	0.0838	0.0026	0.0739	0.0029	0.0837	0.003	0.0771
Chr1	5280001	5290000	0.0043	0.1133	0.0041	0.1147	0.004	0.0963	0.0036	0.0901	0.0028	0.0724	0.0032	0.0733
Chr1	5290001	5300000	0.0034	0.0926	0.0033	0.0967	0.0033	0.0897	0.0029	0.0808	0.003	0.0857	0.0029	0.0729
Chr1	5300001	5310000	0.003	0.0894	0.0032	0.0958	0.0032	0.088	0.003	0.0867	0.0031	0.0896	0.0029	0.0741
Chr1	5310001	5320000	0.0027	0.0874	0.0033	0.0989	0.0035	0.0984	0.0025	0.0772	0.0033	0.0989	0.0032	0.0869
Chr1	5320001	5330000	0.0027	0.0857	0.0034	0.1041	0.0034	0.0942	0.0032	0.0908	0.0033	0.096	0.0037	0.0979
Chr1	5330001	5340000	0.0029	0.0858	0.0031	0.0925	0.0033	0.0939	0.0031	0.0878	0.0034	0.0952	0.0033	0.0907
Chr1	5340001	5350000	0.0029	0.0904	0.0035	0.1049	0.0033	0.0954	0.0029	0.084	0.0032	0.0927	0.0033	0.0917
Chr1	5350001	5360000	0.0035	0.1077	0.0034	0.1009	0.0042	0.1152	0.0028	0.0811	0.0031	0.0897	0.0037	0.0941
Chr1	5360001	5370000	0.003	0.0906	0.003	0.0834	0.0033	0.0871	0.0033	0.0907	0.0031	0.082	0.0039	0.0987
Chr1	5370001	5380000	0.0036	0.1051	0.0037	0.1065	0.0036	0.0993	0.0028	0.0778	0.0026	0.0742	0.0032	0.0862
Chr1	5380001	5390000	0.0031	0.094	0.0028	0.0919	0.0029	0.088	0.0028	0.0892	0.0026	0.0804	0.0028	0.0805
Chr1	5390001	5400000	0.0026	0.0824	0.0029	0.0875	0.0028	0.0735	0.0032	0.0957	0.0032	0.0906	0.0034	0.0842
Chr1	5400001	5410000	0.0028	0.0769	0.0028	0.0795	0.0031	0.083	0.0027	0.0784	0.0032	0.089	0.0032	0.0819
Chr1	5410001	5420000	0.0034	0.093	0.0035	0.0949	0.0037	0.0841	0.0033	0.0857	0.0035	0.0832	0.0034	0.078
Chr1	5420001	5430000	0.0032	0.0999	0.0026	0.0813	0.0028	0.0843	0.0031	0.0867	0.0035	0.101	0.0034	0.0924
Chr1	5430001	5440000	0.0031	0.0922	0.0028	0.0856	0.0037	0.0941	0.0032	0.0898	0.0033	0.0906	0.0035	0.0866
Chr1	5440001	5450000	0.0033	0.1071	0.003	0.0973	0.0036	0.1039	0.0034	0.1008	0.0032	0.0937	0.0039	0.1033
Chr1	5450001	5460000	0.003	0.0814	0.0031	0.0873	0.0032	0.0791	0.0026	0.0665	0.0024	0.0649	0.0031	0.0716
Chr1	5460001	5470000	0.003	0.0841	0.0033	0.088	0.0036	0.0894	0.0033	0.0883	0.0035	0.0896	0.0033	0.0789
Chr1	5470001	5480000	0.0027	0.0886	0.0032	0.1048	0.003	0.0915	0.0025	0.0763	0.0034	0.1023	0.003	0.0831
Chr1	5480001	5490000	0.0028	0.0759	0.0028	0.0723	0.0033	0.0816	0.0028	0.074	0.003	0.0776	0.0032	0.074
Chr1	5490001	5500000	0.0032	0.0966	0.0032	0.0942	0.0031	0.0806	0.0027	0.0783	0.0026	0.0755	0.0035	0.0893
Chr1	5500001	5510000	0.0027	0.0782	0.0028	0.076	0.0033	0.0879	0.0031	0.0839	0.0026	0.069	0.0033	0.0839
Chr1	5510001	5520000	0.0029	0.0763	0.0032	0.0864	0.0031	0.0744	0.0033	0.0831	0.0034	0.0849	0.0034	0.0757
Chr1	5520001	5530000	0.0032	0.0923	0.0035	0.1099	0.0031	0.0887	0.0026	0.0763	0.0027	0.0804	0.0028	0.0758
Chr1	5530001	5540000	0.0031	0.0945	0.0037	0.107	0.0029	0.0729	0.0032	0.0942	0.003	0.0815	0.003	0.0739
Chr1	5540001	5550000	0.0028	0.0881	0.0031	0.0928	0.003	0.0836	0.0028	0.0781	0.0027	0.0769	0.0029	0.0784
Chr1	5550001	5560000	0.0035	0.0994	0.0038	0.1053	0.0032	0.0757	0.0037	0.0979	0.0028	0.0732	0.0034	0.078
Chr1	5560001	5570000	0.0029	0.0831	0.0029	0.0887	0.0033	0.0921	0.0034	0.0918	0.0028	0.0785	0.0032	0.0851
Chr1	5570001	5580000	0.0036	0.0955	0.0033	0.0885	0.0036	0.0876	0.0026	0.0703	0.0027	0.0769	0.0026	0.0629
Chr1	5580001	5590000	0.003	0.0908	0.0038	0.1123	0.0041	0.1082	0.003	0.0843	0.0025	0.0712	0.003	0.0748
Chr1	5590001	5600000	0.0214	0.2536	0.0065	0.1353	0.0047	0.0754	0.0033	0.0602	0.0026	0.0618	0.0031	0.0485
Chr1	5600001	5610000	0.0212	0.2456	0.0078	0.1512	0.0034	0.0531	0.0026	0.0492	0.0023	0.0557	0.0033	0.0509
Chr1	5610001	5620000	0.0035	0.0964	0.0029	0.0881	0.0034	0.0876	0.0032	0.0883	0.0032	0.0856	0.0032	0.0799
Chr1	5620001	5630000	0.0034	0.1074	0.0035	0.1065	0.0038	0.1028	0.0032	0.0907	0.0033	0.0899	0.0029	0.0748
Chr1	5630001	5640000	0.0031	0.0961	0.0027	0.0856	0.0034	0.0937	0.0027	0.0786	0.0023	0.0702	0.003	0.0802
Chr1	5640001	5650000	0.0031	0.0949	0.0032	0.098	0.0033	0.0954	0.0028	0.0795	0.0032	0.0887	0.0029	0.0778
Chr1	5650001	5660000	0.0033	0.1035	0.0035	0.1034	0.0036	0.101	0.003	0.0857	0.0031	0.0839	0.0031	0.0818
Chr1	5660001	5670000	0.0036	0.1096	0.0034	0.0985	0.0038	0.1042	0.0029	0.0821	0.0031	0.0869	0.0029	0.074
Chr1	5670001	5680000	0.0024	0.0638	0.0025	0.0673	0.0033	0.085	0.0027	0.0724	0.003	0.0826	0.0027	0.0666
Chr1	5680001	5690000	0.0031	0.0832	0.0033	0.0891	0.0031	0.0778	0.0032	0.0881	0.003	0.0783	0.0033	0.0809
Chr1	5690001	5700000	0.0027	0.0844	0.0031	0.1	0.0036	0.1105	0.0029	0.0925	0.0038	0.1164	0.0037	0.1088
Chr1	5700001	5710000	0.0033	0.1031	0.0037	0.1153	0.0037	0.1119	0.0032	0.0972	0.0029	0.0863	0.0028	0.0806
Chr1	5710001	5720000	0.0028	0.0943	0.0031	0.1	0.0036	0.1054	0.0031	0.0893	0.0029	0.083	0.0036	0.0969
Chr1	5720001	5730000	0.0032	0.1058	0.0043	0.1355	0.0033	0.1033	0.0032	0.0947	0.0033	0.0968	0.0032	0.0925
Chr1	5730001	5740000	0.0033	0.0941	0.0032	0.0979	0.0036	0.0946	0.0031	0.0871	0.0032	0.0863	0.0032	0.074
Chr1	5740001	5750000	0.0029	0.0816	0.0026	0.0734	0.0029	0.0712	0.0029	0.0778	0.0035	0.09	0.0028	0.0637
Chr1	5750001	5760000	0.003	0.0813	0.0027	0.0745	0.0031	0.0787	0.0031	0.0802	0.003	0.0794	0.0031	0.0766
Chr1	5760001	5770000	0.0039	0.1129	0.0031	0.089	0.0035	0.0968	0.0035	0.0957	0.0035	0.0944	0.0032	0.0817
Chr1	5770001	5780000	0.003	0.085	0.0033	0.0939	0.0035	0.0913	0.003	0.0802	0.0029	0.0734	0.0031	0.0725
Chr1	5780001	5790000	0.0026	0.0833	0.0026	0.0809	0.0029	0.0817	0.0028	0.0826	0.0032	0.0947	0.0031	0.0855
Chr1	5790001	5800000	0.003	0.0813	0.0032	0.0849	0.0031	0.0676	0.0027	0.0698	0.0032	0.0803	0.0027	0.0574
Chr1	5800001	5810000	0.0032	0.0911	0.0034	0.0942	0.0034	0.0881	0.0028	0.0741	0.0022	0.0583	0.003	0.0737
Chr1	5810001	5820000	0.0028	0.0906	0.0028	0.0865	0.0028	0.0795	0.0035	0.1017	0.0037	0.1041	0.0035	0.0891
Chr1	5820001	5830000	0.0037	0.118	0.0031	0.0955	0.0032	0.0954	0.0028	0.0877	0.0034	0.1002	0.0028	0.0801
Chr1	5830001	5840000	0.0033	0.1013	0.0034	0.1056	0.0039	0.1066	0.0027	0.0813	0.0032	0.0891	0.003	0.0753
Chr1	5840001	5850000	0.003	0.0977	0.0032	0.1013	0.0035	0.1039	0.003	0.0908	0.0032	0.0967	0.0031	0.0875
Chr1	5850001	5860000	0.0029	0.086	0.0032	0.0891	0.0029	0.0765	0.0032	0.0871	0.0029	0.0819	0.0028	0.0711
Chr1	5860001	5870000	0.0033	0.1024	0.0029	0.0867	0.0037	0.1016	0.0029	0.0819	0.0025	0.0739	0.0029	0.0747
Chr1	5870001	5880000	0.0029	0.0865	0.003	0.0868	0.0032	0.0787	0.0029	0.083	0.0028	0.074	0.0028	0.0686
Chr1	5880001	5890000	0.0031	0.0943	0.003	0.087	0.0032	0.0864	0.0029	0.0773	0.0034	0.086	0.0033	0.0796
Chr1	5890001	5900000	0.0024	0.07	0.003	0.0855	0.0031	0.0834	0.0032	0.0889	0.0038	0.1057	0.0036	0.0905
Chr1	5900001	5910000	0.003	0.0774	0.0025	0.0626	0.0028	0.0664	0.0031	0.0774	0.003	0.076	0.0027	0.0629
Chr1	5910001	5920000	0.0032	0.0971	0.0025	0.0763	0.0031	0.081	0.0028	0.0821	0.003	0.0886	0.0035	0.0875
Chr1	5920001	5930000	0.0032	0.0896	0.0033	0.0964	0.0035	0.0915	0.0033	0.0923	0.0032	0.0857	0.0029	0.073
Chr1	5930001	5940000	0.003	0.0892	0.0033	0.1003	0.0033	0.0861	0.003	0.0855	0.0029	0.0843	0.003	0.0789
Chr1	5940001	5950000	0.0037	0.1013	0.0036	0.0963	0.0035	0.0875	0.0027	0.0744	0.0027	0.0679	0.0031	0.0775
Chr1	5950001	5960000	0.0026	0.0808	0.0029	0.0897	0.0032	0.0881	0.003	0.0855	0.0029	0.0822	0.0031	0.0784
Chr1	5960001	5970000	0.0028	0.0902	0.003	0.0908	0.0033	0.0971	0.0024	0.0729	0.0028	0.0829	0.0025	0.0688
Chr1	5970001	5980000	0.0031	0.1059	0.0034	0.1207	0.0036	0.1194	0.0028	0.0878	0.0031	0.0998	0.0031	0.0956
Chr1	5980001	5990000	0.0032	0.0938	0.0033	0.0964	0.0031	0.0835	0.0029	0.082	0.0032	0.0918	0.0039	0.0981
Chr1	5990001	6000000	0.0028	0.0799	0.0032	0.0898	0.0034	0.0916	0.0028	0.0793	0.0032	0.0921	0.0034	0.0857
Chr1	6000001	6010000	0.0029	0.0797	0.0026	0.0725	0.0028	0.0697	0.003	0.0765	0.0029	0.0747	0.0032	0.0738
Chr1	6010001	6020000	0.0027	0.0827	0.0031	0.0929	0.0031	0.0868	0.0027	0.0759	0.0028	0.0771	0.0029	0.0753
Chr1	6020001	6030000	0.0034	0.0999	0.0026	0.0841	0.0032	0.0878	0.0041	0.1151	0.0037	0.1075	0.004	0.1057
Chr1	6030001	6040000	0.0031	0.0852	0.003	0.0874	0.0031	0.0834	0.0024	0.0652	0.0031	0.0901	0.0032	0.0793
Chr1	6040001	6050000	0.0033	0.0841	0.0032	0.0834	0.0035	0.0831	0.0031	0.0805	0.003	0.0767	0.0032	0.0742
Chr1	6050001	6060000	0.0029	0.0781	0.0032	0.0878	0.0028	0.0745	0.0033	0.085	0.003	0.0789	0.0036	0.0885
Chr1	6060001	6070000	0.0031	0.0944	0.0031	0.0949	0.0035	0.0976	0.0031	0.086	0.0026	0.0711	0.003	0.0762
Chr1	6070001	6080000	0.0032	0.0976	0.0035	0.1039	0.0033	0.093	0.003	0.0832	0.0025	0.0696	0.0032	0.0796
Chr1	6080001	6090000	0.0028	0.0893	0.0025	0.0749	0.0032	0.0931	0.0032	0.0949	0.004	0.1132	0.0033	0.0911
Chr1	6090001	6100000	0.003	0.0913	0.0032	0.0989	0.0031	0.087	0.0024	0.0722	0.0026	0.0777	0.0033	0.0919
Chr1	6100001	6110000	0.0034	0.1064	0.0026	0.0871	0.003	0.0863	0.0034	0.1032	0.0034	0.1013	0.0033	0.0895
Chr1	6110001	6120000	0.0028	0.0776	0.0033	0.0957	0.0033	0.0817	0.0027	0.073	0.0034	0.0904	0.003	0.0729
Chr1	6120001	6130000	0.0026	0.0761	0.0035	0.0993	0.0033	0.089	0.0027	0.0728	0.0029	0.0808	0.003	0.0787
Chr1	6130001	6140000	0.0025	0.08	0.0028	0.0922	0.0032	0.0914	0.0028	0.0807	0.0038	0.1074	0.0028	0.0725
Chr1	6140001	6150000	0.0029	0.1006	0.0031	0.1031	0.0037	0.1218	0.0032	0.102	0.0035	0.1069	0.0032	0.0948
Chr1	6150001	6160000	0.0029	0.0881	0.0029	0.089	0.0033	0.0913	0.0029	0.0833	0.0031	0.0866	0.0029	0.0752
Chr1	6160001	6170000	0.003	0.0894	0.0034	0.1003	0.003	0.0785	0.0032	0.0875	0.0038	0.1043	0.0033	0.0804
Chr1	6170001	6180000	0.0033	0.0998	0.003	0.0923	0.0031	0.0866	0.0028	0.0815	0.0024	0.0718	0.0029	0.0752
Chr1	6180001	6190000	0.0029	0.0949	0.0025	0.0812	0.0033	0.0964	0.0034	0.1029	0.0031	0.0924	0.0036	0.0911
Chr1	6190001	6200000	0.003	0.0893	0.0034	0.1047	0.0033	0.0926	0.0029	0.0841	0.0031	0.0885	0.0029	0.0783
Chr1	6200001	6210000	0.003	0.0865	0.0032	0.0938	0.0029	0.0787	0.003	0.0853	0.0031	0.0897	0.003	0.08
Chr1	6210001	6220000	0.0032	0.0956	0.0036	0.1008	0.0037	0.0993	0.0028	0.0811	0.0029	0.0797	0.0031	0.0795
Chr1	6220001	6230000	0.0025	0.079	0.0034	0.1057	0.0036	0.1005	0.0037	0.104	0.0035	0.1018	0.0029	0.0754
Chr1	6230001	6240000	0.0032	0.0946	0.0031	0.0919	0.0032	0.0874	0.0034	0.0961	0.0032	0.0893	0.0035	0.0897
Chr1	6240001	6250000	0.0027	0.082	0.0028	0.0845	0.0034	0.0947	0.0031	0.0902	0.0032	0.0943	0.0036	0.0944
Chr1	6250001	6260000	0.0037	0.108	0.0042	0.1118	0.0039	0.0993	0.004	0.1089	0.0029	0.0771	0.003	0.069
Chr1	6260001	6270000	0.0026	0.0765	0.0028	0.0759	0.003	0.073	0.0033	0.0859	0.0035	0.09	0.0029	0.0679
Chr1	6270001	6280000	0.0038	0.1154	0.0028	0.0827	0.0033	0.0935	0.0029	0.0862	0.0025	0.0746	0.003	0.0805
Chr1	6280001	6290000	0.0026	0.0762	0.0022	0.0664	0.0031	0.0825	0.0025	0.0726	0.0029	0.0799	0.0034	0.086
Chr1	6290001	6300000	0.0035	0.094	0.0043	0.1149	0.0035	0.0924	0.0032	0.0809	0.0031	0.0788	0.0028	0.0709
Chr1	6300001	6310000	0.0027	0.0731	0.0028	0.075	0.003	0.0756	0.0028	0.0749	0.0034	0.0879	0.0031	0.0698
Chr1	6310001	6320000	0.0028	0.0792	0.003	0.0853	0.0032	0.0807	0.0027	0.0737	0.0031	0.0844	0.0028	0.0691
Chr1	6320001	6330000	0.0028	0.0856	0.0028	0.0811	0.0031	0.0893	0.0027	0.072	0.0031	0.0793	0.0035	0.0892
Chr1	6330001	6340000	0.0031	0.0944	0.0028	0.0841	0.0031	0.0856	0.0029	0.0857	0.0025	0.0742	0.0031	0.0841
Chr1	6340001	6350000	0.0032	0.0895	0.0033	0.0929	0.0032	0.0879	0.0025	0.0661	0.0031	0.0826	0.0031	0.0777
Chr1	6350001	6360000	0.003	0.0813	0.0028	0.0714	0.0036	0.0887	0.0033	0.0861	0.0027	0.0698	0.0033	0.0801
Chr1	6360001	6370000	0.0033	0.0849	0.0028	0.0743	0.0036	0.0824	0.0026	0.065	0.0032	0.0806	0.0029	0.0625
Chr1	6370001	6380000	0.0032	0.092	0.0042	0.1151	0.0038	0.0977	0.0027	0.0797	0.0036	0.0993	0.0031	0.0773
Chr1	6380001	6390000	0.0027	0.0722	0.0024	0.0677	0.003	0.0766	0.0031	0.0815	0.0032	0.0833	0.0027	0.0647
Chr1	6390001	6400000	0.0025	0.0735	0.0033	0.0983	0.0034	0.0951	0.0029	0.0794	0.0027	0.0761	0.0026	0.0663
Chr1	6400001	6410000	0.0034	0.1026	0.0031	0.0958	0.003	0.0814	0.0031	0.0883	0.0039	0.1014	0.0035	0.0899
Chr1	6410001	6420000	0.0029	0.0865	0.0034	0.0992	0.0031	0.0831	0.003	0.0881	0.0034	0.0966	0.0033	0.0875
Chr1	6420001	6430000	0.0029	0.0926	0.003	0.0931	0.0034	0.0965	0.0029	0.0831	0.0033	0.098	0.0031	0.0805
Chr1	6430001	6440000	0.0032	0.1015	0.0045	0.1326	0.0042	0.1229	0.0032	0.0955	0.0033	0.0932	0.0031	0.0841
Chr1	6440001	6450000	0.0034	0.1001	0.0031	0.0924	0.0034	0.0946	0.0026	0.0748	0.0031	0.0826	0.0035	0.0898
Chr1	6450001	6460000	0.0029	0.0821	0.0032	0.0832	0.0029	0.0681	0.0039	0.1001	0.004	0.0994	0.0039	0.0853
Chr1	6460001	6470000	0.003	0.0956	0.0027	0.0843	0.003	0.0868	0.0031	0.0867	0.003	0.0807	0.0028	0.0736
Chr1	6470001	6480000	0.0031	0.0897	0.0031	0.091	0.0029	0.0725	0.0029	0.0785	0.0027	0.0705	0.003	0.0695
Chr1	6480001	6490000	0.003	0.0956	0.003	0.0952	0.0032	0.0903	0.0029	0.0868	0.0029	0.086	0.003	0.0757
Chr1	6490001	6500000	0.0037	0.1067	0.0029	0.0833	0.0038	0.1018	0.0032	0.0878	0.0027	0.0751	0.0032	0.0782
Chr1	6500001	6510000	0.0031	0.0898	0.0028	0.0806	0.0031	0.077	0.0032	0.0886	0.0028	0.0756	0.003	0.0679
Chr1	6510001	6520000	0.0024	0.0715	0.0028	0.0814	0.0029	0.0803	0.0029	0.0849	0.0031	0.0884	0.0032	0.0847
Chr1	6520001	6530000	0.0031	0.0851	0.003	0.079	0.0033	0.0833	0.003	0.0787	0.0036	0.0891	0.0037	0.0813
Chr1	6530001	6540000	0.0034	0.0973	0.0035	0.0986	0.0031	0.0809	0.0031	0.0923	0.0029	0.0839	0.0029	0.0756
Chr1	6540001	6550000	0.0036	0.111	0.0029	0.0863	0.0032	0.0902	0.0026	0.0758	0.0028	0.0776	0.0028	0.0736
Chr1	6550001	6560000	0.0029	0.0818	0.0026	0.0762	0.003	0.0762	0.0022	0.0637	0.0031	0.0832	0.0028	0.0741
Chr1	6560001	6570000	0.0028	0.0841	0.0029	0.0878	0.0031	0.0786	0.003	0.0817	0.0028	0.0776	0.0028	0.0706
Chr1	6570001	6580000	0.0028	0.0855	0.0028	0.0891	0.0032	0.0916	0.0027	0.0794	0.0025	0.0763	0.0026	0.0705
Chr1	6580001	6590000	0.0027	0.0828	0.0027	0.0833	0.0034	0.0926	0.0032	0.0926	0.0034	0.0983	0.0038	0.1025
Chr1	6590001	6600000	0.0028	0.0808	0.0033	0.095	0.0032	0.0797	0.0026	0.0766	0.0028	0.0789	0.003	0.0763
Chr1	6600001	6610000	0.0026	0.075	0.0031	0.0911	0.0031	0.0857	0.0025	0.0739	0.0025	0.0732	0.0035	0.0965
Chr1	6610001	6620000	0.0027	0.0811	0.0029	0.0874	0.0032	0.0871	0.0031	0.0905	0.0034	0.0933	0.0027	0.0702
Chr1	6620001	6630000	0.0038	0.1077	0.004	0.1072	0.0041	0.1005	0.0035	0.0926	0.0037	0.0947	0.0038	0.0905
Chr1	6630001	6640000	0.0034	0.089	0.0034	0.0858	0.0031	0.0732	0.0027	0.0718	0.0033	0.0864	0.003	0.0681
Chr1	6640001	6650000	0.0028	0.0723	0.0029	0.0768	0.0031	0.075	0.003	0.0731	0.0029	0.0727	0.0028	0.0633
Chr1	6650001	6660000	0.0026	0.0837	0.0025	0.0818	0.0029	0.0892	0.0031	0.0892	0.0027	0.0807	0.0035	0.1001
Chr1	6660001	6670000	0.0033	0.0908	0.0032	0.0914	0.003	0.0798	0.0037	0.1042	0.0032	0.0873	0.0037	0.0914
Chr1	6670001	6680000	0.0031	0.0992	0.0037	0.1159	0.0034	0.1031	0.0031	0.09	0.0036	0.0982	0.0031	0.0839
Chr1	6680001	6690000	0.0032	0.098	0.0039	0.1202	0.0032	0.0941	0.0028	0.0813	0.0036	0.105	0.0034	0.0913
Chr1	6690001	6700000	0.0036	0.0856	0.0033	0.082	0.0032	0.0758	0.0033	0.0792	0.0031	0.0756	0.0031	0.0692
Chr1	6700001	6710000	0.0033	0.0971	0.0035	0.098	0.0036	0.0928	0.003	0.0827	0.0027	0.074	0.0031	0.0756
Chr1	6710001	6720000	0.0033	0.0906	0.0036	0.1022	0.0034	0.0874	0.0034	0.0899	0.0029	0.0765	0.0032	0.074
Chr1	6720001	6730000	0.0036	0.099	0.0032	0.0871	0.0032	0.0797	0.0028	0.0712	0.0028	0.0719	0.0027	0.0667
Chr1	6730001	6740000	0.0031	0.0813	0.0032	0.0837	0.0032	0.0804	0.0033	0.0878	0.0035	0.0964	0.0045	0.1062
Chr1	6740001	6750000	0.0032	0.0885	0.0032	0.0886	0.0029	0.0753	0.0026	0.0712	0.0029	0.077	0.0028	0.07
Chr1	6750001	6760000	0.0031	0.0923	0.0032	0.0917	0.0033	0.0888	0.003	0.0896	0.0037	0.1029	0.0031	0.0803
Chr1	6760001	6770000	0.0027	0.0882	0.0034	0.1037	0.0032	0.0941	0.0026	0.0787	0.0024	0.071	0.003	0.0824
Chr1	6770001	6780000	0.0032	0.093	0.0036	0.1012	0.0029	0.0755	0.0027	0.0734	0.0026	0.0688	0.0028	0.0682
Chr1	6780001	6790000	0.0033	0.0895	0.0033	0.0863	0.0035	0.0865	0.0023	0.064	0.0031	0.0849	0.0027	0.0706
Chr1	6790001	6800000	0.003	0.0872	0.0026	0.0805	0.003	0.0803	0.0029	0.0832	0.0026	0.0741	0.0029	0.077
Chr1	6800001	6810000	0.0028	0.0806	0.0029	0.0842	0.003	0.0807	0.002	0.0567	0.0027	0.0734	0.0031	0.0741
Chr1	6810001	6820000	0.0029	0.0853	0.003	0.0908	0.0037	0.0985	0.0025	0.0746	0.0027	0.0832	0.0026	0.0678
Chr1	6820001	6830000	0.0034	0.1037	0.0036	0.114	0.0041	0.1239	0.0026	0.0768	0.0031	0.0969	0.0033	0.0925
Chr1	6830001	6840000	0.0026	0.0841	0.0027	0.0897	0.0033	0.1009	0.003	0.09	0.0037	0.1107	0.0036	0.1026
Chr1	6840001	6850000	0.0032	0.0901	0.0032	0.083	0.0038	0.0908	0.0032	0.0837	0.0029	0.076	0.0035	0.0831
Chr1	6850001	6860000	0.0034	0.108	0.0033	0.1048	0.0035	0.1014	0.0031	0.0951	0.0025	0.0763	0.0028	0.0787
Chr1	6860001	6870000	0.0038	0.1148	0.0037	0.105	0.0043	0.1152	0.003	0.0884	0.0035	0.1052	0.0034	0.0902
Chr1	6870001	6880000	0.0035	0.1012	0.0032	0.0911	0.0036	0.0947	0.0039	0.1073	0.0033	0.0909	0.0037	0.093
Chr1	6880001	6890000	0.0036	0.107	0.0034	0.1052	0.0037	0.105	0.0031	0.0884	0.0026	0.0753	0.0031	0.0822
Chr1	6890001	6900000	0.0026	0.0806	0.0029	0.0879	0.0033	0.0912	0.0025	0.0755	0.0033	0.0979	0.0029	0.0775
Chr1	6900001	6910000	0.0029	0.0906	0.0033	0.1022	0.003	0.0864	0.0027	0.0797	0.0027	0.0807	0.0029	0.0804
Chr1	6910001	6920000	0.003	0.0874	0.0036	0.1	0.0037	0.0974	0.0032	0.0875	0.003	0.0833	0.0034	0.0852
Chr1	6920001	6930000	0.0036	0.1081	0.0037	0.1135	0.0039	0.1117	0.0034	0.1032	0.0035	0.1039	0.0032	0.0865
Chr1	6930001	6940000	0.0031	0.0817	0.0034	0.0945	0.0029	0.0728	0.0028	0.0721	0.0031	0.0799	0.0031	0.0716
Chr1	6940001	6950000	0.0028	0.0721	0.0032	0.0819	0.0029	0.0706	0.0029	0.0737	0.0029	0.0746	0.0034	0.0775
Chr1	6950001	6960000	0.003	0.0841	0.003	0.0814	0.003	0.0745	0.0033	0.084	0.0035	0.0929	0.0032	0.0777
Chr1	6960001	6970000	0.0032	0.0968	0.0029	0.0887	0.0032	0.0891	0.0032	0.0924	0.0035	0.1001	0.0031	0.0847
Chr1	6970001	6980000	0.0032	0.0955	0.0028	0.0844	0.0031	0.0897	0.0029	0.0815	0.0027	0.077	0.0034	0.092
Chr1	6980001	6990000	0.0041	0.1216	0.0034	0.0996	0.004	0.1093	0.0028	0.0776	0.0033	0.091	0.003	0.0769
Chr1	6990001	7000000	0.0026	0.0806	0.0027	0.0834	0.0034	0.0899	0.0028	0.0828	0.0034	0.0984	0.0032	0.0844
Chr1	7000001	7010000	0.0025	0.0788	0.0032	0.1004	0.0033	0.0958	0.0023	0.0684	0.0027	0.081	0.0035	0.0958
Chr1	7010001	7020000	0.0029	0.0905	0.0032	0.1006	0.0033	0.0957	0.0027	0.0824	0.0029	0.086	0.0029	0.0811
Chr1	7020001	7030000	0.0034	0.096	0.0035	0.0998	0.0039	0.1058	0.0027	0.0756	0.0033	0.0907	0.0028	0.0746
Chr1	7030001	7040000	0.0034	0.0912	0.004	0.1051	0.0036	0.091	0.0035	0.0925	0.003	0.0779	0.0033	0.0806
Chr1	7040001	7050000	0.0029	0.0811	0.0023	0.0655	0.0032	0.0839	0.0033	0.088	0.003	0.0792	0.0033	0.0827
Chr1	7050001	7060000	0.0031	0.0935	0.0035	0.1078	0.0035	0.1033	0.003	0.0906	0.0032	0.0895	0.0032	0.0936
Chr1	7060001	7070000	0.0035	0.1074	0.0035	0.1034	0.0038	0.1129	0.0024	0.0726	0.0028	0.0859	0.003	0.0823
Chr1	7070001	7080000	0.0033	0.088	0.0031	0.0874	0.0041	0.1053	0.0032	0.0834	0.0031	0.0809	0.0029	0.0724
Chr1	7080001	7090000	0.0032	0.0987	0.0032	0.0986	0.0031	0.0919	0.0028	0.0824	0.0039	0.1094	0.0028	0.0803
Chr1	7090001	7100000	0.0035	0.0952	0.0033	0.0998	0.0037	0.078	0.0023	0.0602	0.0028	0.0802	0.0031	0.0614
Chr1	7100001	7110000	0.0183	0.1323	0.009	0.08	0.0046	0.0296	0.0045	0.044	0.0062	0.0612	0.0042	0.0393
Chr1	7110001	7120000	0.0066	0.1123	0.0032	0.0816	0.0034	0.0429	0.0032	0.0631	0.0029	0.0816	0.0037	0.0492
Chr1	7120001	7130000	0.0041	0.1036	0.0029	0.0809	0.0026	0.0548	0.0031	0.0814	0.003	0.0821	0.0034	0.0665
Chr1	7130001	7140000	0.0222	0.2457	0.0207	0.2674	0.0041	0.0467	0.002	0.026	0.0048	0.0682	0.0026	0.0282
Chr1	7140001	7150000	0.0108	0.1836	0.0059	0.1441	0.0035	0.0576	0.0022	0.0534	0.0026	0.0678	0.0027	0.0449
Chr1	7150001	7160000	0.0152	0.1031	0.0129	0.1053	0.0041	0.0326	0.0038	0.0347	0	0	0.0036	0.0327
Chr1	7160001	7170000	0.0132	0.1157	0.0216	0.1905	0.0043	0.0342	0.0048	0.0478	0.0045	0.0417	0.0034	0.0322
Chr1	7170001	7180000	0.0154	0.1272	0.0373	0.2143	0.0059	0.0464	0.005	0.0442	0	0	0.0032	0.0299
Chr1	7180001	7190000	0.0249	0.1905	0.0111	0.1591	0.0054	0.0441	0.0037	0.04	0.0048	0.0638	0.0032	0.0311
Chr1	7190001	7200000	0.0181	0.1742	0	0	0.0038	0.0316	0.0037	0.0392	0.0029	0.0263	0.0028	0.0257
Chr1	7200001	7210000	0.0176	0.1239	0.0138	0.1071	0.0044	0.0334	0.0022	0.0209	0.0036	0.0357	0.0028	0.0261
Chr1	7210001	7220000	0.0049	0.0983	0.0034	0.0991	0.0039	0.0612	0.0027	0.0634	0.0022	0.0636	0.0026	0.0399
Chr1	7220001	7230000	0.0061	0.1412	0.0026	0.0875	0.003	0.0464	0.003	0.0638	0.0027	0.0805	0.0026	0.0385
Chr1	7230001	7240000	0.0041	0.1109	0.0028	0.0975	0.0034	0.0749	0.0023	0.065	0.0025	0.0788	0.0028	0.0607
Chr1	7240001	7250000	0.0208	0.1653	0.0141	0.1364	0.0032	0.0266	0.0048	0.0541	0.0061	0.0833	0.003	0.0299
Chr1	7250001	7260000	0.0042	0.1064	0.0035	0.0932	0.0031	0.0581	0.004	0.0992	0.0035	0.093	0.0035	0.0628
Chr1	7260001	7270000	0.0034	0.1059	0.0038	0.1176	0.0035	0.1023	0.0031	0.0953	0.0029	0.0843	0.003	0.0826
Chr1	7270001	7280000	0.0033	0.0857	0.0031	0.0788	0.0037	0.0867	0.003	0.0763	0.0024	0.0615	0.003	0.0713
Chr1	7280001	7290000	0.0034	0.0856	0.0027	0.07	0.0032	0.0751	0.003	0.0796	0.0025	0.0659	0.0026	0.0624
Chr1	7290001	7300000	0.0028	0.0734	0.0031	0.0783	0.0025	0.0595	0.0029	0.0764	0.003	0.0775	0.0036	0.0853
Chr1	7300001	7310000	0.0034	0.1024	0.0032	0.0941	0.0031	0.0791	0.003	0.0863	0.0031	0.0903	0.0033	0.0826
Chr1	7310001	7320000	0.003	0.0898	0.0025	0.0792	0.0031	0.0884	0.003	0.087	0.0029	0.0869	0.0031	0.0823
Chr1	7320001	7330000	0.0031	0.0963	0.003	0.09	0.0032	0.0878	0.0035	0.0984	0.0027	0.0702	0.0031	0.08
Chr1	7330001	7340000	0.0033	0.1064	0.003	0.0995	0.0034	0.1018	0.0025	0.0723	0.0031	0.0917	0.0028	0.076
Chr1	7340001	7350000	0.0033	0.0972	0.004	0.1221	0.0036	0.1014	0.0032	0.0931	0.0031	0.0878	0.0033	0.0885
Chr1	7350001	7360000	0.0028	0.0885	0.0034	0.1104	0.0036	0.1054	0.0031	0.0939	0.0027	0.0826	0.0031	0.0852
Chr1	7360001	7370000	0.0031	0.0919	0.0026	0.0814	0.0035	0.0952	0.0029	0.0836	0.0028	0.082	0.0031	0.0834
Chr1	7370001	7380000	0.0034	0.09	0.0035	0.0927	0.0032	0.0757	0.0026	0.0693	0.0031	0.0824	0.003	0.0713
Chr1	7380001	7390000	0.0032	0.095	0.0036	0.1068	0.0034	0.0861	0.003	0.0838	0.0027	0.0709	0.0031	0.0703
Chr1	7390001	7400000	0.003	0.0936	0.0028	0.0851	0.003	0.0797	0.0031	0.0909	0.0029	0.0798	0.0032	0.0796
Chr1	7400001	7410000	0.0027	0.082	0.0029	0.0825	0.0033	0.0849	0.0037	0.1016	0.0036	0.0991	0.0039	0.0947
Chr1	7410001	7420000	0.0029	0.0793	0.0034	0.0934	0.0036	0.0922	0.003	0.078	0.0034	0.0902	0.0031	0.0759
Chr1	7420001	7430000	0.0032	0.087	0.0028	0.0811	0.0036	0.095	0.0032	0.0865	0.0031	0.0872	0.0036	0.095
Chr1	7430001	7440000	0.0032	0.085	0.0032	0.0877	0.0034	0.0844	0.0031	0.081	0.0026	0.0692	0.0032	0.078
Chr1	7440001	7450000	0.003	0.0931	0.0034	0.1001	0.0031	0.09	0.0032	0.0938	0.003	0.0919	0.0033	0.0907
Chr1	7450001	7460000	0.0038	0.1195	0.0031	0.1004	0.0033	0.0982	0.0028	0.0858	0.0031	0.0907	0.0033	0.0937
Chr1	7460001	7470000	0.0027	0.0805	0.0029	0.0858	0.0029	0.0813	0.0032	0.0942	0.0032	0.0897	0.0034	0.0894
Chr1	7470001	7480000	0.0034	0.106	0.0035	0.1009	0.0032	0.0867	0.0029	0.082	0.003	0.0823	0.0029	0.0719
Chr1	7480001	7490000	0.0037	0.112	0.0031	0.0887	0.0039	0.1119	0.0028	0.0836	0.0026	0.0754	0.0029	0.0777
Chr1	7490001	7500000	0.0035	0.1114	0.0045	0.1397	0.004	0.1223	0.0027	0.078	0.0026	0.0805	0.0026	0.0732
Chr1	7500001	7510000	0.0062	0.1263	0.0036	0.1066	0.003	0.0805	0.0035	0.098	0.0028	0.0817	0.0033	0.0832
Chr1	7510001	7520000	0.0051	0.1378	0.0031	0.1057	0.0032	0.0839	0.004	0.1175	0.0035	0.1054	0.0038	0.0916
Chr1	7520001	7530000	0.0171	0.2446	0.0052	0.1176	0.0055	0.0895	0.0028	0.0588	0.0029	0.064	0.003	0.045
Chr1	7530001	7540000	0.0037	0.1162	0.0034	0.1053	0.004	0.1178	0.0033	0.0984	0.0034	0.1037	0.0035	0.0955
Chr1	7540001	7550000	0.0026	0.0806	0.003	0.0925	0.0028	0.0791	0.0027	0.0833	0.0028	0.0822	0.0032	0.0869
Chr1	7550001	7560000	0.0033	0.0915	0.0036	0.0976	0.0031	0.0734	0.0031	0.0819	0.0031	0.0848	0.0035	0.0815
Chr1	7560001	7570000	0.0029	0.08	0.0031	0.0857	0.0037	0.0997	0.0026	0.0725	0.0033	0.0886	0.0033	0.0808
Chr1	7570001	7580000	0.003	0.088	0.003	0.0827	0.0032	0.0817	0.0023	0.063	0.0029	0.0799	0.0033	0.0846
Chr1	7580001	7590000	0.0019	0.0576	0.0029	0.0807	0.0034	0.0918	0.0029	0.0824	0.0028	0.0798	0.0031	0.0787
Chr1	7590001	7600000	0.0034	0.0976	0.0031	0.0916	0.0035	0.0909	0.003	0.0901	0.0027	0.0804	0.0035	0.089
Chr1	7600001	7610000	0.0028	0.0793	0.0026	0.0715	0.0027	0.0704	0.003	0.0836	0.0037	0.1024	0.003	0.0742
Chr1	7610001	7620000	0.0036	0.1063	0.003	0.0903	0.0038	0.103	0.0036	0.1007	0.0025	0.0725	0.0037	0.0958
Chr1	7620001	7630000	0.0034	0.0972	0.003	0.0854	0.0035	0.0938	0.0032	0.0875	0.0025	0.0688	0.0032	0.0788
Chr1	7630001	7640000	0.0034	0.1079	0.0029	0.0898	0.0038	0.1073	0.0031	0.0856	0.0026	0.0741	0.003	0.0758
Chr1	7640001	7650000	0.0032	0.1041	0.0036	0.1119	0.0034	0.109	0.0029	0.0881	0.0029	0.0895	0.0034	0.1019
Chr1	7650001	7660000	0.003	0.0947	0.0034	0.1116	0.0033	0.1029	0.0028	0.0878	0.003	0.0912	0.0033	0.093
Chr1	7660001	7670000	0.0034	0.1085	0.0033	0.1034	0.0032	0.094	0.0026	0.0808	0.0028	0.0865	0.0032	0.0895
Chr1	7670001	7680000	0.003	0.0776	0.003	0.078	0.0028	0.0675	0.003	0.0743	0.0033	0.083	0.0031	0.0688
Chr1	7680001	7690000	0.0027	0.0773	0.0028	0.0798	0.0028	0.0745	0.003	0.0874	0.0031	0.0889	0.0032	0.0795
Chr1	7690001	7700000	0.0038	0.1107	0.003	0.0882	0.0035	0.0939	0.0031	0.0869	0.0035	0.0946	0.003	0.0704
Chr1	7700001	7710000	0.0026	0.0799	0.0025	0.0767	0.0029	0.0826	0.0028	0.0772	0.0027	0.0779	0.0028	0.072
Chr1	7710001	7720000	0.0035	0.1089	0.004	0.1235	0.0036	0.1052	0.0026	0.0746	0.0025	0.0718	0.0033	0.0885
Chr1	7720001	7730000	0.007	0.1583	0.0044	0.1374	0.0041	0.1034	0.0028	0.0778	0.0025	0.0797	0.0027	0.0659
Chr1	7730001	7740000	0.0043	0.1134	0.0037	0.102	0.0032	0.0748	0.0032	0.0847	0.0039	0.0998	0.0033	0.0701
Chr1	7740001	7750000	0.0027	0.0797	0.0029	0.086	0.003	0.0826	0.0031	0.088	0.0026	0.0716	0.0031	0.0778
Chr1	7750001	7760000	0.0031	0.0936	0.0027	0.0809	0.0028	0.0826	0.0034	0.0959	0.0028	0.0833	0.0033	0.0882
Chr1	7760001	7770000	0.0027	0.0769	0.0029	0.0798	0.0032	0.0815	0.0039	0.1056	0.0045	0.1188	0.0044	0.1084
Chr1	7770001	7780000	0.0032	0.0906	0.0028	0.0803	0.0031	0.08	0.0029	0.0769	0.0033	0.0899	0.0029	0.0732
Chr1	7780001	7790000	0.0029	0.0838	0.0027	0.0792	0.0036	0.0828	0.0029	0.0819	0.0034	0.0877	0.003	0.0678
Chr1	7790001	7800000	0.0028	0.0863	0.0028	0.0876	0.0035	0.1028	0.0028	0.0802	0.0035	0.0997	0.0032	0.0851
Chr1	7800001	7810000	0.004	0.1203	0.0033	0.1022	0.0036	0.0998	0.0032	0.0913	0.0028	0.0837	0.0032	0.0857
Chr1	7810001	7820000	0.003	0.0981	0.0031	0.1121	0.0032	0.1045	0.0029	0.0937	0.0031	0.1005	0.0035	0.1055
Chr1	7820001	7830000	0.0029	0.0869	0.003	0.0957	0.0035	0.1008	0.0032	0.0927	0.003	0.0862	0.0032	0.0894
Chr1	7830001	7840000	0.0029	0.0754	0.0033	0.0865	0.0031	0.0734	0.0026	0.0696	0.0032	0.0847	0.0029	0.0664
Chr1	7840001	7850000	0.0031	0.0949	0.0034	0.1036	0.0035	0.0995	0.0034	0.0984	0.0028	0.0837	0.003	0.0807
Chr1	7850001	7860000	0.0028	0.0883	0.0028	0.0831	0.0034	0.0995	0.0028	0.0836	0.0027	0.0814	0.0027	0.0765
Chr1	7860001	7870000	0.0027	0.0778	0.0031	0.0898	0.0036	0.0935	0.0029	0.0818	0.0031	0.0863	0.0031	0.078
Chr1	7870001	7880000	0.0028	0.0858	0.0034	0.1011	0.0032	0.093	0.0032	0.0894	0.0029	0.0786	0.003	0.0785
Chr1	7880001	7890000	0.003	0.094	0.003	0.0911	0.0029	0.0805	0.0029	0.0877	0.0028	0.0798	0.0031	0.0814
Chr1	7890001	7900000	0.0032	0.1013	0.0026	0.0771	0.0029	0.0824	0.0028	0.0802	0.0029	0.087	0.0035	0.0901
Chr1	7900001	7910000	0.0029	0.0816	0.0033	0.0955	0.003	0.0795	0.0029	0.0808	0.0024	0.0682	0.0028	0.0706
Chr1	7910001	7920000	0.0035	0.1031	0.0031	0.0939	0.0037	0.1032	0.0034	0.0966	0.004	0.1115	0.004	0.1024
Chr1	7920001	7930000	0.0032	0.0875	0.0032	0.0866	0.0034	0.0908	0.0027	0.0745	0.0035	0.0956	0.003	0.0805
Chr1	7930001	7940000	0.003	0.0818	0.0039	0.1072	0.0033	0.0842	0.0034	0.0906	0.0032	0.0861	0.0033	0.0804
Chr1	7940001	7950000	0.0034	0.0982	0.0028	0.0846	0.0031	0.085	0.0026	0.0775	0.003	0.0848	0.0033	0.0866
Chr1	7950001	7960000	0.003	0.0951	0.0028	0.0924	0.003	0.0907	0.0028	0.0832	0.003	0.0932	0.0027	0.0804
Chr1	7960001	7970000	0.0028	0.0927	0.0028	0.0869	0.003	0.092	0.003	0.0895	0.0031	0.0896	0.0031	0.0913
Chr1	7970001	7980000	0.0037	0.1068	0.0034	0.1006	0.0035	0.0945	0.0032	0.0932	0.0027	0.0809	0.003	0.0786
Chr1	7980001	7990000	0.0035	0.0968	0.0033	0.0889	0.0033	0.0772	0.0027	0.0748	0.0026	0.0705	0.0032	0.071
Chr1	7990001	8000000	0.0032	0.0897	0.0033	0.0975	0.0038	0.1028	0.0031	0.0892	0.0027	0.079	0.003	0.0776
Chr1	8000001	8010000	0.0035	0.1076	0.0033	0.1011	0.0036	0.1003	0.0028	0.0819	0.0033	0.0971	0.0028	0.0749
Chr1	8010001	8020000	0.003	0.0897	0.0032	0.0956	0.0034	0.0963	0.0026	0.0764	0.0028	0.0857	0.0034	0.0961
Chr1	8020001	8030000	0.0029	0.0786	0.003	0.0804	0.0031	0.0754	0.003	0.0794	0.0031	0.0802	0.0033	0.0786
Chr1	8030001	8040000	0.0032	0.0981	0.0036	0.1074	0.0031	0.0843	0.0023	0.0646	0.0025	0.0736	0.0032	0.0768
Chr1	8040001	8050000	0.0033	0.0873	0.004	0.1094	0.0031	0.0742	0.0033	0.0891	0.0029	0.0775	0.003	0.0715
Chr1	8050001	8060000	0.0032	0.0868	0.0034	0.0942	0.0032	0.0796	0.003	0.0821	0.0026	0.0693	0.0029	0.0721
Chr1	8060001	8070000	0.0028	0.0716	0.0031	0.0821	0.0027	0.0678	0.0033	0.0808	0.0034	0.0866	0.0031	0.0767
Chr1	8070001	8080000	0.0025	0.0694	0.003	0.0879	0.003	0.0775	0.0026	0.0713	0.0029	0.0785	0.0025	0.0621
Chr1	8080001	8090000	0.0037	0.1095	0.003	0.0936	0.0036	0.0976	0.0028	0.0788	0.0028	0.0777	0.0032	0.0786
Chr1	8090001	8100000	0.0027	0.0789	0.0028	0.0803	0.003	0.0776	0.0028	0.0785	0.0031	0.087	0.0032	0.0799
Chr1	8100001	8110000	0.0034	0.0985	0.0029	0.0851	0.0036	0.0933	0.0025	0.0718	0.0029	0.0745	0.0034	0.0847
Chr1	8110001	8120000	0.0033	0.0875	0.0034	0.0943	0.0033	0.0804	0.0027	0.0724	0.003	0.079	0.0033	0.0774
Chr1	8120001	8130000	0.0034	0.099	0.0038	0.1114	0.0038	0.0998	0.0029	0.0807	0.0033	0.089	0.0033	0.0818
Chr1	8130001	8140000	0.003	0.0842	0.0034	0.094	0.0033	0.087	0.0035	0.0978	0.0035	0.0943	0.0035	0.0888
Chr1	8140001	8150000	0.003	0.0943	0.0027	0.0815	0.0026	0.0807	0.0031	0.0973	0.0029	0.0861	0.0035	0.0968
Chr1	8150001	8160000	0.003	0.0862	0.0029	0.0829	0.0031	0.0798	0.0038	0.1006	0.0032	0.0881	0.004	0.0984
Chr1	8160001	8170000	0.0034	0.091	0.0042	0.1151	0.0038	0.0916	0.003	0.0783	0.003	0.078	0.0029	0.0677
Chr1	8170001	8180000	0.0026	0.0802	0.003	0.0898	0.0029	0.0773	0.0028	0.0856	0.003	0.0866	0.0028	0.0728
Chr1	8180001	8190000	0.003	0.0876	0.0036	0.1023	0.0034	0.0871	0.0023	0.0671	0.0031	0.0844	0.0027	0.0684
Chr1	8190001	8200000	0.0036	0.102	0.0036	0.1052	0.0034	0.0931	0.0033	0.0927	0.0031	0.0808	0.0032	0.0801
Chr1	8200001	8210000	0.003	0.084	0.0031	0.0868	0.0038	0.0916	0.0028	0.0779	0.0025	0.0677	0.0031	0.0735
Chr1	8210001	8220000	0.0038	0.102	0.0039	0.0983	0.0037	0.0851	0.0031	0.0781	0.0027	0.0711	0.0034	0.075
Chr1	8220001	8230000	0.0033	0.089	0.0029	0.0777	0.0034	0.0863	0.0026	0.0721	0.0032	0.088	0.003	0.076
Chr1	8230001	8240000	0.0027	0.0822	0.0025	0.0747	0.0032	0.0857	0.0029	0.0856	0.0031	0.089	0.0032	0.0836
Chr1	8240001	8250000	0.0032	0.094	0.0037	0.1099	0.0033	0.0955	0.0042	0.1169	0.0045	0.1279	0.0047	0.1232
Chr1	8250001	8260000	0.0031	0.0882	0.0032	0.0892	0.0031	0.08	0.004	0.1075	0.0036	0.0942	0.0039	0.096
Chr1	8260001	8270000	0.0029	0.0837	0.0029	0.0867	0.0034	0.0872	0.0031	0.0823	0.0025	0.0695	0.0026	0.0652
Chr1	8270001	8280000	0.0028	0.0821	0.0029	0.087	0.0034	0.0926	0.0031	0.0885	0.003	0.0841	0.0035	0.0873
Chr1	8280001	8290000	0.0029	0.0895	0.0031	0.093	0.0032	0.089	0.0035	0.1076	0.0041	0.1108	0.0043	0.1098
Chr1	8290001	8300000	0.0026	0.0845	0.003	0.0973	0.0032	0.0954	0.0036	0.1105	0.004	0.1196	0.0031	0.0865
Chr1	8300001	8310000	0.0031	0.0838	0.0027	0.0721	0.0033	0.0871	0.0028	0.0771	0.0027	0.073	0.0032	0.0824
Chr1	8310001	8320000	0.003	0.0827	0.0034	0.0922	0.0036	0.0922	0.0025	0.0684	0.0024	0.0663	0.0034	0.0843
Chr1	8320001	8330000	0.0037	0.0989	0.0034	0.0926	0.0043	0.1019	0.003	0.0797	0.0024	0.0595	0.0027	0.0625
Chr1	8330001	8340000	0.0029	0.0761	0.0029	0.0796	0.0034	0.0798	0.0031	0.0755	0.0037	0.0972	0.0037	0.0841
Chr1	8340001	8350000	0.0029	0.0797	0.0029	0.0812	0.0032	0.0793	0.0027	0.0714	0.0033	0.0849	0.0031	0.0706
Chr1	8350001	8360000	0.0029	0.0828	0.0031	0.0898	0.0033	0.0909	0.0027	0.0785	0.0033	0.095	0.0029	0.0788
Chr1	8360001	8370000	0.0029	0.084	0.0029	0.081	0.0031	0.079	0.0034	0.092	0.0031	0.0855	0.0039	0.0968
Chr1	8370001	8380000	0.003	0.0905	0.0032	0.0922	0.0029	0.0805	0.0038	0.1075	0.0036	0.1017	0.0039	0.1005
Chr1	8380001	8390000	0.0033	0.0958	0.0038	0.1057	0.0042	0.1004	0.0032	0.0875	0.0035	0.0953	0.0031	0.0747
Chr1	8390001	8400000	0.0033	0.0944	0.0037	0.1066	0.0034	0.0921	0.0028	0.0748	0.0039	0.1035	0.0032	0.0792
Chr1	8400001	8410000	0.0026	0.08	0.0028	0.0818	0.003	0.0851	0.0027	0.0744	0.0035	0.0906	0.0031	0.0769
Chr1	8410001	8420000	0.0034	0.0986	0.0032	0.0945	0.0033	0.0902	0.0028	0.0826	0.0024	0.0725	0.0032	0.0849
Chr1	8420001	8430000	0.0028	0.0854	0.0033	0.0975	0.0031	0.0829	0.0038	0.1026	0.004	0.1082	0.004	0.0998
Chr1	8430001	8440000	0.0028	0.0857	0.0031	0.0917	0.0034	0.0976	0.0033	0.0947	0.0027	0.0763	0.003	0.0816
Chr1	8440001	8450000	0.0028	0.0827	0.0027	0.0774	0.003	0.0794	0.0026	0.0718	0.0031	0.0852	0.0026	0.062
Chr1	8450001	8460000	0.003	0.0918	0.0026	0.0795	0.0032	0.0911	0.0029	0.0814	0.0025	0.0731	0.0031	0.0821
Chr1	8460001	8470000	0.0035	0.1049	0.0034	0.0978	0.0033	0.09	0.003	0.0844	0.003	0.0823	0.0037	0.0924
Chr1	8470001	8480000	0.0039	0.1148	0.004	0.1166	0.0045	0.1186	0.003	0.0839	0.0032	0.0866	0.0033	0.0858
Chr1	8480001	8490000	0.0034	0.0925	0.0037	0.1013	0.004	0.1047	0.0024	0.0682	0.0033	0.0864	0.0029	0.0735
Chr1	8490001	8500000	0.0026	0.0806	0.0027	0.0823	0.003	0.0823	0.003	0.0866	0.0029	0.0805	0.0033	0.0866
Chr1	8500001	8510000	0.0028	0.0803	0.0036	0.1075	0.003	0.084	0.003	0.0873	0.0034	0.0974	0.0028	0.0729
Chr1	8510001	8520000	0.0031	0.0865	0.0034	0.0921	0.0032	0.0783	0.0025	0.0684	0.0036	0.0967	0.0035	0.0839
Chr1	8520001	8530000	0.0032	0.0892	0.0033	0.0923	0.0038	0.0956	0.0033	0.0906	0.0035	0.0957	0.0038	0.0918
Chr1	8530001	8540000	0.0028	0.0841	0.003	0.0885	0.0028	0.0802	0.0029	0.0864	0.0031	0.0877	0.003	0.084
Chr1	8540001	8550000	0.0028	0.0943	0.0033	0.109	0.0034	0.1084	0.003	0.0934	0.003	0.0928	0.0033	0.0929
Chr1	8550001	8560000	0.0032	0.0919	0.0031	0.0963	0.0032	0.0917	0.0036	0.103	0.0035	0.099	0.0034	0.0881
Chr1	8560001	8570000	0.0028	0.0787	0.0029	0.0785	0.0031	0.0792	0.0024	0.0657	0.0031	0.0799	0.0029	0.0709
Chr1	8570001	8580000	0.0029	0.0814	0.0033	0.088	0.0032	0.0781	0.0035	0.0882	0.003	0.0764	0.003	0.0693
Chr1	8580001	8590000	0.003	0.0895	0.0033	0.1006	0.0031	0.0916	0.0021	0.0632	0.0026	0.0778	0.0029	0.0782
Chr1	8590001	8600000	0.0027	0.0752	0.0025	0.0697	0.0029	0.0723	0.0033	0.0896	0.0034	0.0899	0.0032	0.0777
Chr1	8600001	8610000	0.0029	0.0836	0.0032	0.0885	0.004	0.1098	0.0025	0.0735	0.0027	0.0763	0.0031	0.0777
Chr1	8610001	8620000	0.0028	0.0835	0.003	0.0888	0.0029	0.0788	0.0027	0.076	0.0025	0.0693	0.0027	0.0685
Chr1	8620001	8630000	0.0029	0.0828	0.0031	0.0877	0.0027	0.0692	0.003	0.0814	0.0028	0.0691	0.0027	0.0628
Chr1	8630001	8640000	0.0036	0.0992	0.0033	0.0883	0.0034	0.0822	0.0031	0.0873	0.0026	0.0666	0.0031	0.0734
Chr1	8640001	8650000	0.0029	0.0829	0.0032	0.088	0.0033	0.0814	0.003	0.0816	0.0031	0.0827	0.0029	0.0679
Chr1	8650001	8660000	0.0038	0.1035	0.004	0.1118	0.0038	0.0929	0.0025	0.0635	0.0032	0.0811	0.0038	0.0862
Chr1	8660001	8670000	0.0029	0.0855	0.0031	0.0854	0.0034	0.091	0.0028	0.0794	0.0034	0.0915	0.0031	0.0792
Chr1	8670001	8680000	0.0037	0.1172	0.0036	0.1156	0.0039	0.115	0.0024	0.0738	0.0023	0.0704	0.0026	0.0711
Chr1	8680001	8690000	0.0045	0.1333	0.0035	0.1006	0.0037	0.098	0.0034	0.0911	0.0035	0.0934	0.0036	0.0878
Chr1	8690001	8700000	0.0033	0.0923	0.003	0.0833	0.0033	0.0789	0.0037	0.0964	0.0035	0.0874	0.0034	0.0763
Chr1	8700001	8710000	0.0033	0.0952	0.0034	0.0968	0.0033	0.0848	0.0029	0.0802	0.003	0.0855	0.0035	0.0846
Chr1	8710001	8720000	0.0029	0.0749	0.0035	0.09	0.0033	0.08	0.0032	0.084	0.0035	0.089	0.0028	0.0611
Chr1	8720001	8730000	0.0034	0.0853	0.0033	0.0823	0.0037	0.088	0.003	0.0757	0.0027	0.067	0.0032	0.0747
Chr1	8730001	8740000	0.0039	0.1061	0.0032	0.0867	0.0033	0.082	0.0027	0.074	0.0033	0.09	0.0029	0.0716
Chr1	8740001	8750000	0.0037	0.0979	0.0038	0.1039	0.0034	0.0879	0.0031	0.0817	0.0032	0.0827	0.003	0.0703
Chr1	8750001	8760000	0.0027	0.0799	0.0033	0.0931	0.0026	0.0682	0.003	0.0814	0.0033	0.0914	0.003	0.0699
Chr1	8760001	8770000	0.0031	0.0837	0.0029	0.0794	0.0035	0.0788	0.0028	0.0793	0.0031	0.0823	0.0029	0.0683
Chr1	8770001	8780000	0.0026	0.0762	0.0028	0.0826	0.0036	0.0939	0.0031	0.0885	0.0029	0.0809	0.003	0.0782
Chr1	8780001	8790000	0.003	0.0922	0.0027	0.0833	0.0034	0.0959	0.0034	0.096	0.0034	0.093	0.003	0.0797
Chr1	8790001	8800000	0.003	0.0898	0.0035	0.1072	0.0034	0.0991	0.003	0.0922	0.0029	0.0856	0.0032	0.0881
Chr1	8800001	8810000	0.0033	0.1031	0.003	0.0935	0.0032	0.0902	0.0029	0.0839	0.0036	0.1042	0.0034	0.0884
Chr1	8810001	8820000	0.0029	0.0802	0.0029	0.0805	0.0035	0.0928	0.0029	0.0802	0.0032	0.0856	0.003	0.074
Chr1	8820001	8830000	0.0036	0.0961	0.0037	0.1103	0.0033	0.0882	0.0026	0.0724	0.0026	0.0765	0.0029	0.072
Chr1	8830001	8840000	0.003	0.1055	0.0034	0.1163	0.0031	0.0982	0.0027	0.0916	0.0029	0.0894	0.0031	0.094
Chr1	8840001	8850000	0.0033	0.0951	0.0037	0.1073	0.0033	0.0876	0.0033	0.0935	0.0033	0.0895	0.0032	0.0824
Chr1	8850001	8860000	0.003	0.0857	0.0034	0.0976	0.0032	0.0808	0.0032	0.0884	0.0033	0.0911	0.0032	0.0796
Chr1	8860001	8870000	0.0033	0.0991	0.0037	0.1108	0.0036	0.0998	0.0027	0.0794	0.0032	0.0931	0.0037	0.0959
Chr1	8870001	8880000	0.0029	0.0829	0.0033	0.094	0.0032	0.0783	0.0031	0.0848	0.0026	0.0736	0.0032	0.0777
Chr1	8880001	8890000	0.0035	0.1022	0.003	0.0822	0.0034	0.0894	0.0031	0.0862	0.0028	0.0789	0.003	0.0743
Chr1	8890001	8900000	0.0032	0.0946	0.0034	0.1049	0.003	0.0852	0.0028	0.0788	0.0028	0.0785	0.0029	0.0789
Chr1	8900001	8910000	0.004	0.109	0.0037	0.1019	0.0039	0.0955	0.0033	0.0903	0.0034	0.089	0.0031	0.0727
Chr1	8910001	8920000	0.0028	0.0666	0.0031	0.0763	0.0032	0.0666	0.003	0.0732	0.0022	0.0536	0.003	0.0641
Chr1	8920001	8930000	0.0033	0.1006	0.0036	0.1032	0.0032	0.0926	0.0035	0.1063	0.0028	0.0849	0.0034	0.0975
Chr1	8930001	8940000	0.0032	0.0967	0.0032	0.1016	0.0035	0.0974	0.0029	0.0863	0.0032	0.0932	0.003	0.0775
Chr1	8940001	8950000	0.0035	0.1084	0.0033	0.0993	0.0032	0.0939	0.0028	0.0811	0.0033	0.0942	0.0034	0.0908
Chr1	8950001	8960000	0.0038	0.1201	0.0032	0.098	0.0037	0.1059	0.0025	0.0771	0.0035	0.1053	0.0032	0.0885
Chr1	8960001	8970000	0.0031	0.1028	0.0029	0.0898	0.0033	0.0938	0.0028	0.0827	0.0027	0.0779	0.003	0.0813
Chr1	8970001	8980000	0.0031	0.096	0.0033	0.0931	0.0033	0.0934	0.0029	0.0876	0.003	0.0842	0.0029	0.0794
Chr1	8980001	8990000	0.0029	0.0844	0.0033	0.0961	0.0036	0.097	0.0029	0.083	0.0031	0.0873	0.0032	0.0846
Chr1	8990001	9000000	0.0033	0.1055	0.0035	0.1099	0.0032	0.0967	0.0032	0.0972	0.0034	0.1023	0.0026	0.0735
Chr1	9000001	9010000	0.0031	0.0922	0.0031	0.0912	0.0034	0.0936	0.0028	0.0826	0.0022	0.0664	0.0026	0.0694
Chr1	9010001	9020000	0.0029	0.084	0.003	0.0851	0.0035	0.0908	0.0031	0.0837	0.0031	0.0867	0.0035	0.0843
Chr1	9020001	9030000	0.0031	0.104	0.0032	0.1003	0.0032	0.0965	0.0029	0.0875	0.0032	0.0947	0.0031	0.085
Chr1	9030001	9040000	0.0027	0.0863	0.0033	0.0999	0.0032	0.092	0.0034	0.0994	0.0036	0.1041	0.0036	0.0994
Chr1	9040001	9050000	0.0029	0.0823	0.0037	0.1088	0.0035	0.093	0.0034	0.0959	0.0033	0.0942	0.0037	0.0955
Chr1	9050001	9060000	0.0033	0.1057	0.0035	0.1145	0.0033	0.1012	0.0028	0.0842	0.0028	0.0852	0.0026	0.0762
Chr1	9060001	9070000	0.003	0.0909	0.003	0.0918	0.0034	0.0964	0.0036	0.1027	0.0023	0.0685	0.0028	0.0754
Chr1	9070001	9080000	0.0031	0.0876	0.003	0.0835	0.0029	0.069	0.0032	0.0867	0.003	0.0796	0.0032	0.0732
Chr1	9080001	9090000	0.0035	0.1036	0.0036	0.0976	0.0037	0.0997	0.0031	0.0874	0.003	0.082	0.0033	0.0821
Chr1	9090001	9100000	0.0038	0.1084	0.0041	0.1186	0.004	0.1031	0.0031	0.0873	0.003	0.0823	0.0031	0.0759
Chr1	9100001	9110000	0.003	0.0986	0.003	0.0916	0.003	0.0855	0.0028	0.0804	0.0031	0.0896	0.0036	0.0892
Chr1	9110001	9120000	0.0029	0.0891	0.0031	0.0974	0.0036	0.1046	0.0021	0.0608	0.0029	0.0773	0.0031	0.0812
Chr1	9120001	9130000	0.0035	0.1093	0.0029	0.0869	0.0031	0.0873	0.0033	0.0927	0.0029	0.0788	0.0032	0.0818
Chr1	9130001	9140000	0.0033	0.0997	0.0035	0.112	0.004	0.1153	0.0031	0.088	0.0031	0.0886	0.003	0.082
Chr1	9140001	9150000	0.0026	0.0856	0.0034	0.1107	0.0032	0.0986	0.0032	0.0992	0.0037	0.1093	0.0036	0.1009
Chr1	9150001	9160000	0.0023	0.0733	0.0025	0.0801	0.0033	0.0979	0.0029	0.0858	0.0031	0.0915	0.0027	0.0739
Chr1	9160001	9170000	0.0032	0.0965	0.0033	0.1064	0.0036	0.1069	0.0031	0.087	0.0036	0.1089	0.0035	0.0935
Chr1	9170001	9180000	0.0031	0.0939	0.0038	0.115	0.0032	0.0876	0.0032	0.0881	0.0039	0.1053	0.0026	0.0678
Chr1	9180001	9190000	0.004	0.1072	0.003	0.0931	0.0033	0.0819	0.0032	0.0902	0.0034	0.1013	0.0035	0.0834
Chr1	9190001	9200000	0.0039	0.117	0.0031	0.1038	0.0034	0.0957	0.0037	0.1138	0.0033	0.1065	0.0034	0.0844
Chr1	9200001	9210000	0.0032	0.0983	0.0032	0.097	0.0034	0.0969	0.0025	0.0759	0.0027	0.0778	0.0028	0.0745
Chr1	9210001	9220000	0.0029	0.0903	0.0026	0.0746	0.0034	0.0977	0.0026	0.0794	0.0032	0.0889	0.0029	0.0813
Chr1	9220001	9230000	0.0036	0.1138	0.0032	0.1004	0.0037	0.1055	0.0026	0.0755	0.0028	0.0815	0.0031	0.0827
Chr1	9230001	9240000	0.0035	0.1142	0.0029	0.0898	0.0036	0.1082	0.003	0.0898	0.0026	0.0776	0.0029	0.0806
Chr1	9240001	9250000	0.0029	0.0929	0.0034	0.1042	0.0034	0.102	0.0028	0.078	0.0029	0.0813	0.0033	0.0896
Chr1	9250001	9260000	0.0031	0.1067	0.0032	0.1079	0.0034	0.1053	0.0025	0.0751	0.0035	0.0978	0.0029	0.0826
Chr1	9260001	9270000	0.0033	0.1058	0.0035	0.1133	0.0038	0.1119	0.0031	0.085	0.0033	0.0902	0.0037	0.0959
Chr1	9270001	9275483	0.0033	0.1058	0.0035	0.1133	0.0038	0.1119	0.0031	0.085	0.0033	0.0902	0.0037	0.0959
Chr2	1	10000	0.0025	0.0865	0.0033	0.1156	0.0033	0.108	0.0031	0.0923	0.0032	0.1019	0.0034	0.0985
Chr2	10001	20000	0.0035	0.1133	0.0032	0.0957	0.0034	0.1058	0.0026	0.0801	0.003	0.092	0.0029	0.0842
Chr2	20001	30000	0.0034	0.104	0.0034	0.1058	0.0041	0.1092	0.003	0.0865	0.0037	0.1012	0.003	0.0752
Chr2	30001	40000	0.0026	0.0784	0.0034	0.1004	0.0033	0.092	0.0031	0.0949	0.004	0.1128	0.0038	0.0977
Chr2	40001	50000	0.0027	0.0828	0.0028	0.0871	0.0035	0.0973	0.003	0.085	0.003	0.0825	0.0031	0.0761
Chr2	50001	60000	0.0032	0.0979	0.0033	0.0979	0.0038	0.0972	0.0029	0.0819	0.0037	0.0996	0.0031	0.0766
Chr2	60001	70000	0.0038	0.1224	0.0033	0.1053	0.0039	0.1173	0.0031	0.0987	0.0031	0.0915	0.0033	0.0945
Chr2	70001	80000	0.0029	0.0858	0.0032	0.097	0.0043	0.117	0.0026	0.0753	0.0032	0.0907	0.0029	0.073
Chr2	80001	90000	0.0031	0.1001	0.0028	0.0847	0.0033	0.0913	0.0028	0.0808	0.0028	0.081	0.0034	0.0891
Chr2	90001	100000	0.0032	0.104	0.0035	0.1088	0.0035	0.1041	0.0032	0.0993	0.0028	0.0842	0.0026	0.0717
Chr2	100001	110000	0.0034	0.1047	0.0032	0.0989	0.0031	0.0901	0.0028	0.0856	0.0037	0.1122	0.0036	0.0998
Chr2	110001	120000	0.0029	0.0959	0.0031	0.1068	0.0029	0.0969	0.0028	0.0882	0.0027	0.0854	0.0033	0.0983
Chr2	120001	130000	0.0031	0.0984	0.0033	0.1018	0.0032	0.0943	0.0032	0.094	0.0029	0.0841	0.0031	0.0853
Chr2	130001	140000	0.0029	0.0876	0.0036	0.1044	0.0033	0.0933	0.003	0.0853	0.0034	0.096	0.0034	0.091
Chr2	140001	150000	0.0026	0.0865	0.0026	0.0832	0.003	0.0893	0.0031	0.0904	0.0036	0.1085	0.0035	0.0926
Chr2	150001	160000	0.0029	0.0913	0.0027	0.0858	0.0036	0.1104	0.003	0.0888	0.0029	0.0828	0.0031	0.0848
Chr2	160001	170000	0.0037	0.1032	0.0033	0.092	0.0036	0.0954	0.0026	0.069	0.0026	0.0692	0.0029	0.072
Chr2	170001	180000	0.0028	0.0862	0.0032	0.0939	0.0033	0.0947	0.0031	0.0909	0.0034	0.0972	0.0035	0.0933
Chr2	180001	190000	0.0033	0.0935	0.0036	0.1024	0.0033	0.0853	0.0027	0.0768	0.0027	0.0742	0.0034	0.0839
Chr2	190001	200000	0.003	0.0952	0.0029	0.094	0.0034	0.1063	0.0031	0.0908	0.0031	0.0931	0.0035	0.0973
Chr2	200001	210000	0.0029	0.0912	0.0032	0.095	0.0039	0.1077	0.003	0.084	0.0032	0.0894	0.0033	0.083
Chr2	210001	220000	0.0037	0.1138	0.0033	0.103	0.0039	0.1114	0.0031	0.0919	0.0026	0.0781	0.0029	0.0817
Chr2	220001	230000	0.0029	0.0883	0.0031	0.0948	0.003	0.0805	0.0026	0.0713	0.0031	0.0844	0.003	0.0726
Chr2	230001	240000	0.0027	0.0744	0.0042	0.1146	0.0031	0.0826	0.003	0.0801	0.0032	0.0866	0.0032	0.0815
Chr2	240001	250000	0.003	0.0767	0.0028	0.0713	0.0032	0.0704	0.0032	0.0802	0.0028	0.0703	0.0033	0.0677
Chr2	250001	260000	0.003	0.0903	0.0032	0.0974	0.0037	0.0976	0.0029	0.0818	0.003	0.0875	0.0026	0.0676
Chr2	260001	270000	0.0035	0.1097	0.0039	0.119	0.0042	0.1184	0.0034	0.1008	0.0041	0.1194	0.0036	0.0957
Chr2	270001	280000	0.0027	0.0749	0.0034	0.0994	0.0029	0.0747	0.0028	0.0755	0.003	0.0857	0.0032	0.0835
Chr2	280001	290000	0.0029	0.0708	0.0031	0.0794	0.0028	0.0658	0.0025	0.0655	0.003	0.0734	0.0027	0.0608
Chr2	290001	300000	0.0026	0.068	0.0031	0.0849	0.0035	0.0853	0.003	0.074	0.0024	0.061	0.0034	0.0796
Chr2	300001	310000	0.003	0.0894	0.0032	0.0932	0.004	0.1063	0.0031	0.0846	0.0029	0.0828	0.0036	0.092
Chr2	310001	320000	0.0029	0.0856	0.0036	0.1044	0.003	0.0798	0.0032	0.0899	0.0025	0.0688	0.0029	0.0748
Chr2	320001	330000	0.0029	0.0829	0.0031	0.0853	0.0031	0.0842	0.0028	0.0795	0.0028	0.0733	0.0034	0.0846
Chr2	330001	340000	0.0032	0.088	0.0033	0.0868	0.0035	0.0831	0.003	0.0821	0.0029	0.0757	0.0034	0.0798
Chr2	340001	350000	0.0039	0.0738	0.0035	0.0841	0.0031	0.0649	0.003	0.0656	0.0028	0.0643	0.0029	0.0574
Chr2	350001	360000	0.0241	0.2912	0.0064	0.1183	0.0041	0.069	0.0029	0.064	0.0039	0.114	0.0031	0.0544
Chr2	360001	370000	0.0108	0.1761	0.0046	0.1342	0.0036	0.0895	0.003	0.0833	0.0028	0.0872	0.0034	0.0797
Chr2	370001	380000	0.0028	0.0718	0.0037	0.0968	0.0028	0.0668	0.0029	0.0787	0.0034	0.0867	0.0035	0.08
Chr2	380001	390000	0.0028	0.084	0.0032	0.0976	0.0032	0.0978	0.003	0.0848	0.003	0.087	0.0029	0.0791
Chr2	390001	400000	0.0029	0.0827	0.0033	0.0962	0.0036	0.0981	0.0031	0.0855	0.0027	0.0762	0.0029	0.0707
Chr2	400001	410000	0.0031	0.082	0.0026	0.0703	0.0032	0.0836	0.0025	0.0651	0.0028	0.076	0.0028	0.0671
Chr2	410001	420000	0.0027	0.0808	0.0036	0.1082	0.0028	0.0757	0.0028	0.0782	0.0031	0.0889	0.0029	0.0727
Chr2	420001	430000	0.0033	0.0946	0.0038	0.1097	0.0033	0.0843	0.003	0.084	0.0032	0.0873	0.0032	0.0767
Chr2	430001	440000	0.0027	0.0772	0.0032	0.0931	0.0031	0.081	0.0031	0.0892	0.0029	0.0798	0.0031	0.0817
Chr2	440001	450000	0.0033	0.0985	0.0029	0.0858	0.0037	0.0961	0.0025	0.0683	0.0026	0.0681	0.0027	0.0689
Chr2	450001	460000	0.0032	0.1	0.0029	0.091	0.0027	0.0785	0.0025	0.0738	0.0032	0.0931	0.0031	0.0858
Chr2	460001	470000	0.0033	0.0958	0.0033	0.0969	0.0039	0.1108	0.0025	0.0733	0.0033	0.0933	0.0028	0.0786
Chr2	470001	480000	0.0032	0.1045	0.0034	0.1111	0.0034	0.103	0.0028	0.0872	0.0027	0.084	0.003	0.0836
Chr2	480001	490000	0.0031	0.0965	0.0034	0.0997	0.0034	0.0966	0.0026	0.075	0.0027	0.0809	0.0027	0.0719
Chr2	490001	500000	0.0033	0.099	0.0042	0.1149	0.0032	0.0861	0.0035	0.098	0.003	0.085	0.0033	0.0859
Chr2	500001	510000	0.004	0.1333	0.0036	0.1256	0.0035	0.1026	0.003	0.0917	0.0027	0.0848	0.003	0.0787
Chr2	510001	520000	0.003	0.1016	0.0031	0.1033	0.0032	0.0962	0.0031	0.0943	0.0032	0.0976	0.003	0.0832
Chr2	520001	530000	0.0106	0.1047	0.0073	0.1651	0.0034	0.0332	0.0019	0.024	0.0016	0.0357	0.0023	0.0274
Chr2	530001	540000	0.0109	0.1118	0.0037	0.0426	0.0035	0.0338	0.0021	0.0222	0.0036	0.0426	0.0019	0.0202
Chr2	540001	550000	0.0062	0.057	0.003	0.0312	0.0033	0.0285	0.0023	0.0244	0.0026	0.0294	0.0026	0.0255
Chr2	550001	560000	0.0079	0.0681	0.0093	0.0882	0.0034	0.0286	0.005	0.0545	0.0052	0.0588	0.0028	0.0268
Chr2	560001	570000	0.0111	0.1008	0.0104	0.1071	0.0044	0.04	0.0045	0.0449	0.0016	0.0172	0.0029	0.0294
Chr2	570001	580000	0.0112	0.1025	0.0058	0.0698	0.0038	0.0329	0.0029	0.0272	0.0043	0.0444	0.0019	0.0179
Chr2	580001	590000	0.0057	0.0455	0	0	0.0032	0.0256	0.0058	0.0546	0	0	0.0024	0.0227
Chr2	590001	600000	0.0053	0.0381	0.0061	0.0667	0.0018	0.0146	0.002	0.0194	0	0	0.0021	0.0202
Chr2	600001	610000	0.0083	0.0845	0.0055	0.0556	0.0028	0.0251	0.0031	0.0335	0.0026	0.0278	0.004	0.0383
Chr2	610001	620000	0.0119	0.1108	0.01	0.1132	0.0031	0.0298	0.0051	0.0531	0.0052	0.0556	0.004	0.0395
Chr2	620001	630000	0.0076	0.055	0.0076	0.0667	0.0031	0.024	0.0059	0.058	0	0	0.0035	0.0314
Chr2	630001	640000	0.0097	0.092	0.0196	0.1765	0.0039	0.032	0.0026	0.022	0.006	0.0588	0.0026	0.0248
Chr2	640001	650000	0.0111	0.0913	0.0101	0.0882	0.0042	0.031	0.0026	0.0256	0.0029	0.0286	0.002	0.0187
Chr2	650001	660000	0.0095	0.0671	0.0038	0.0303	0.0046	0.0345	0.0036	0.035	0.0108	0.0882	0.0028	0.0272
Chr2	660001	670000	0.0054	0.1013	0.0037	0.1044	0.0027	0.0394	0.0044	0.097	0.0037	0.1099	0.004	0.0617
Chr2	670001	680000	0.0033	0.1073	0.0034	0.1074	0.0037	0.0953	0.0028	0.0817	0.0028	0.0827	0.0034	0.0801
Chr2	680001	690000	0.003	0.0967	0.0031	0.0934	0.003	0.0901	0.0027	0.0844	0.0029	0.085	0.0032	0.0884
Chr2	690001	700000	0.003	0.0982	0.0033	0.1068	0.0035	0.103	0.0029	0.0879	0.0032	0.0928	0.0038	0.0989
Chr2	700001	710000	0.0032	0.0985	0.0033	0.1004	0.004	0.1137	0.0035	0.1054	0.0033	0.0994	0.0035	0.0984
Chr2	710001	720000	0.0031	0.0969	0.0033	0.1097	0.0033	0.1009	0.0031	0.0952	0.0032	0.0948	0.0033	0.0915
Chr2	720001	730000	0.0029	0.0936	0.0031	0.1024	0.0033	0.0946	0.0023	0.0683	0.0024	0.0679	0.003	0.0783
Chr2	730001	740000	0.0032	0.096	0.0028	0.0891	0.0031	0.0878	0.0028	0.081	0.0022	0.066	0.0029	0.0763
Chr2	740001	750000	0.0028	0.0868	0.0033	0.0935	0.0031	0.0852	0.0033	0.0939	0.0034	0.0959	0.0029	0.0774
Chr2	750001	760000	0.0042	0.1292	0.0039	0.1221	0.0036	0.1081	0.0029	0.0848	0.0028	0.0826	0.0033	0.0905
Chr2	760001	770000	0.0034	0.0963	0.0035	0.099	0.0033	0.0887	0.0028	0.0803	0.0029	0.0781	0.0032	0.0795
Chr2	770001	780000	0.0029	0.0935	0.0035	0.1109	0.0034	0.1051	0.0028	0.0855	0.0036	0.1035	0.0031	0.0905
Chr2	780001	790000	0.003	0.0813	0.0033	0.0871	0.0033	0.0811	0.0035	0.0997	0.0035	0.1007	0.0038	0.0939
Chr2	790001	800000	0.0033	0.0969	0.0032	0.1001	0.0033	0.0863	0.0031	0.0901	0.003	0.0864	0.0028	0.0697
Chr2	800001	810000	0.0032	0.1049	0.0035	0.1115	0.0034	0.1065	0.0033	0.099	0.0032	0.0954	0.003	0.0864
Chr2	810001	820000	0.0029	0.0932	0.003	0.0982	0.0032	0.093	0.0028	0.0828	0.0035	0.1007	0.0035	0.0946
Chr2	820001	830000	0.0031	0.0933	0.0035	0.1057	0.0035	0.0971	0.0027	0.0805	0.0026	0.0754	0.0031	0.0837
Chr2	830001	840000	0.0027	0.0767	0.0038	0.1115	0.0033	0.087	0.003	0.0822	0.0026	0.0753	0.003	0.0779
Chr2	840001	850000	0.0029	0.0796	0.0026	0.0751	0.0031	0.0759	0.0034	0.0929	0.0035	0.0912	0.0037	0.086
Chr2	850001	860000	0.0029	0.0878	0.0039	0.1142	0.0034	0.0912	0.0028	0.0827	0.0031	0.0854	0.0034	0.0867
Chr2	860001	870000	0.0031	0.106	0.0033	0.1054	0.0034	0.1035	0.0029	0.0803	0.0033	0.097	0.0034	0.0933
Chr2	870001	880000	0.0028	0.0816	0.003	0.0875	0.0031	0.0845	0.0025	0.0705	0.0025	0.0717	0.0032	0.0785
Chr2	880001	890000	0.0035	0.1116	0.0038	0.1185	0.004	0.1182	0.003	0.0884	0.0029	0.0849	0.0032	0.0859
Chr2	890001	900000	0.0038	0.1056	0.004	0.1171	0.0037	0.1077	0.0034	0.0996	0.0041	0.1175	0.0037	0.0966
Chr2	900001	910000	0.0034	0.0939	0.0031	0.0844	0.0031	0.0778	0.0029	0.0781	0.0032	0.0866	0.0033	0.0806
Chr2	910001	920000	0.0032	0.0966	0.0034	0.1031	0.004	0.1151	0.0029	0.0835	0.0029	0.0827	0.0028	0.0746
Chr2	920001	930000	0.0031	0.0795	0.0028	0.0766	0.003	0.0706	0.0027	0.0709	0.0026	0.0684	0.0029	0.0667
Chr2	930001	940000	0.0028	0.0846	0.0031	0.0901	0.0032	0.0858	0.0032	0.0875	0.0029	0.0829	0.0032	0.0799
Chr2	940001	950000	0.003	0.0941	0.0023	0.0752	0.0033	0.0986	0.0032	0.0954	0.0034	0.0972	0.0028	0.0778
Chr2	950001	960000	0.0029	0.0843	0.0033	0.0944	0.0035	0.0878	0.003	0.0836	0.0034	0.0936	0.0032	0.0825
Chr2	960001	970000	0.0027	0.0722	0.0027	0.075	0.0027	0.0647	0.0027	0.0719	0.0028	0.0762	0.0027	0.0653
Chr2	970001	980000	0.0032	0.0907	0.0028	0.0814	0.0032	0.0818	0.0033	0.0915	0.0027	0.0748	0.0026	0.0643
Chr2	980001	990000	0.0032	0.0971	0.0033	0.1005	0.0033	0.0922	0.003	0.0859	0.0028	0.0809	0.0029	0.0737
Chr2	990001	1000000	0.004	0.0992	0.0033	0.0817	0.0032	0.0777	0.0035	0.0873	0.0029	0.0726	0.0032	0.0719
Chr2	1000001	1010000	0.0029	0.0843	0.0029	0.0833	0.0029	0.0814	0.0033	0.0915	0.0035	0.1002	0.0036	0.0971
Chr2	1010001	1020000	0.0023	0.0734	0.0028	0.087	0.003	0.084	0.003	0.0883	0.0033	0.096	0.0029	0.0794
Chr2	1020001	1030000	0.0043	0.1235	0.0037	0.1103	0.0035	0.096	0.0024	0.0682	0.0027	0.0743	0.0026	0.0695
Chr2	1030001	1040000	0.0029	0.0972	0.0029	0.0993	0.0034	0.1039	0.0028	0.0858	0.0029	0.0864	0.0028	0.0792
Chr2	1040001	1050000	0.0031	0.0993	0.0025	0.0834	0.0028	0.0829	0.0034	0.0975	0.0033	0.0964	0.0034	0.0904
Chr2	1050001	1060000	0.003	0.0946	0.0034	0.1098	0.0037	0.1153	0.0029	0.0912	0.003	0.0941	0.0026	0.0773
Chr2	1060001	1070000	0.0029	0.0899	0.0035	0.1094	0.0038	0.1082	0.0028	0.0793	0.0029	0.0857	0.0031	0.0804
Chr2	1070001	1080000	0.0031	0.0892	0.0032	0.0868	0.0032	0.0851	0.003	0.0823	0.0026	0.0679	0.0031	0.0743
Chr2	1080001	1090000	0.0033	0.1012	0.0028	0.0906	0.003	0.089	0.0033	0.0983	0.0027	0.0804	0.0032	0.0867
Chr2	1090001	1100000	0.0032	0.0914	0.0028	0.0843	0.003	0.0848	0.0031	0.0897	0.0035	0.1014	0.0032	0.0898
Chr2	1100001	1110000	0.0027	0.081	0.0034	0.0989	0.0028	0.0765	0.0031	0.0869	0.0026	0.0753	0.0032	0.0809
Chr2	1110001	1120000	0.0028	0.0868	0.0036	0.1043	0.0034	0.0933	0.0029	0.0851	0.003	0.0833	0.0037	0.0957
Chr2	1120001	1130000	0.0027	0.0784	0.0036	0.102	0.0037	0.0951	0.0024	0.0659	0.0034	0.0955	0.0032	0.0775
Chr2	1130001	1140000	0.0023	0.055	0.0032	0.0817	0.0031	0.0669	0.0028	0.0692	0.003	0.0763	0.0033	0.0704
Chr2	1140001	1150000	0.0025	0.077	0.003	0.0911	0.0033	0.093	0.0028	0.0831	0.003	0.0836	0.0035	0.094
Chr2	1150001	1160000	0.0026	0.0864	0.0027	0.0862	0.003	0.0892	0.0028	0.0791	0.0021	0.0637	0.0032	0.0865
Chr2	1160001	1170000	0.004	0.122	0.0035	0.1121	0.0037	0.1046	0.0028	0.0831	0.0026	0.0748	0.0034	0.0908
Chr2	1170001	1180000	0.003	0.0905	0.003	0.0926	0.0031	0.0808	0.0025	0.0722	0.0032	0.0916	0.0031	0.0771
Chr2	1180001	1190000	0.0028	0.0738	0.0025	0.063	0.0032	0.0758	0.0028	0.0747	0.0029	0.0738	0.0032	0.0726
Chr2	1190001	1200000	0.0028	0.0888	0.003	0.0971	0.003	0.0854	0.0031	0.0929	0.0035	0.1045	0.0038	0.1064
Chr2	1200001	1210000	0.0027	0.0819	0.0031	0.0919	0.0033	0.0923	0.0026	0.0762	0.003	0.0865	0.0032	0.0818
Chr2	1210001	1220000	0.0029	0.0955	0.0027	0.086	0.0032	0.0996	0.0028	0.0837	0.0034	0.1	0.0031	0.0878
Chr2	1220001	1230000	0.0037	0.1096	0.0033	0.096	0.0038	0.1019	0.0028	0.0797	0.0038	0.1052	0.0032	0.0777
Chr2	1230001	1240000	0.0026	0.0648	0.0029	0.0752	0.003	0.07	0.0029	0.0772	0.0029	0.07	0.0029	0.0686
Chr2	1240001	1250000	0.0032	0.0971	0.0031	0.0935	0.003	0.0845	0.0031	0.0848	0.0029	0.0826	0.003	0.0761
Chr2	1250001	1260000	0.0029	0.0924	0.003	0.0944	0.0027	0.0777	0.0027	0.0802	0.0029	0.0874	0.0031	0.0819
Chr2	1260001	1270000	0.0033	0.1034	0.0028	0.0879	0.0032	0.0943	0.0027	0.0817	0.0035	0.103	0.0035	0.0958
Chr2	1270001	1280000	0.0029	0.0926	0.0034	0.1089	0.0034	0.1013	0.0034	0.1027	0.003	0.0886	0.0033	0.0933
Chr2	1280001	1290000	0.0037	0.1185	0.0025	0.08	0.0032	0.0981	0.0031	0.0924	0.0032	0.0925	0.0031	0.088
Chr2	1290001	1300000	0.0034	0.1057	0.0031	0.095	0.0033	0.0935	0.0033	0.0981	0.0028	0.0856	0.0034	0.0931
Chr2	1300001	1310000	0.0035	0.1033	0.0032	0.0945	0.0032	0.0855	0.0029	0.0817	0.003	0.083	0.003	0.0759
Chr2	1310001	1320000	0.0029	0.0918	0.0039	0.118	0.0037	0.104	0.0035	0.1034	0.0035	0.0997	0.004	0.1039
Chr2	1320001	1330000	0.0031	0.0956	0.0033	0.1042	0.0036	0.1057	0.0031	0.0872	0.0028	0.0793	0.0029	0.0776
Chr2	1330001	1340000	0.0043	0.1091	0.003	0.0932	0.003	0.0785	0.0024	0.0727	0.0031	0.0965	0.0031	0.0745
Chr2	1340001	1350000	0.0031	0.0937	0.0032	0.1004	0.0034	0.0938	0.0039	0.11	0.0036	0.1021	0.0039	0.1005
Chr2	1350001	1360000	0.0031	0.0981	0.0035	0.109	0.0035	0.1055	0.0032	0.0952	0.003	0.0875	0.0032	0.0862
Chr2	1360001	1370000	0.0032	0.0987	0.003	0.092	0.0033	0.0949	0.0032	0.0927	0.0033	0.0883	0.0035	0.0942
Chr2	1370001	1380000	0.0033	0.1036	0.0033	0.1049	0.0037	0.1108	0.0034	0.102	0.0033	0.0965	0.0038	0.0982
Chr2	1380001	1390000	0.0035	0.1082	0.003	0.0888	0.0035	0.0997	0.0028	0.079	0.0026	0.0776	0.0032	0.0824
Chr2	1390001	1400000	0.0029	0.09	0.0027	0.0877	0.003	0.0909	0.0028	0.0837	0.0028	0.0808	0.0031	0.0886
Chr2	1400001	1410000	0.0035	0.0985	0.0035	0.0992	0.0034	0.0893	0.0029	0.0812	0.0025	0.0707	0.0029	0.0704
Chr2	1410001	1420000	0.0028	0.0887	0.0029	0.0912	0.0032	0.0955	0.0027	0.0809	0.0036	0.1041	0.0031	0.0859
Chr2	1420001	1430000	0.0037	0.1095	0.0029	0.088	0.0035	0.0963	0.003	0.0845	0.0028	0.0796	0.0029	0.0732
Chr2	1430001	1440000	0.0034	0.1056	0.0034	0.1021	0.0031	0.093	0.0035	0.0988	0.0028	0.0839	0.0031	0.0883
Chr2	1440001	1450000	0.0039	0.1095	0.0041	0.122	0.0041	0.1094	0.0031	0.0845	0.0031	0.0873	0.0031	0.0795
Chr2	1450001	1460000	0.003	0.0913	0.0032	0.0995	0.0032	0.0938	0.0035	0.0987	0.0034	0.1003	0.0033	0.0912
Chr2	1460001	1470000	0.003	0.1001	0.0036	0.1163	0.0037	0.1135	0.0028	0.0856	0.0028	0.0884	0.0032	0.0971
Chr2	1470001	1480000	0.0033	0.0998	0.0028	0.0858	0.0039	0.1086	0.0033	0.0941	0.0031	0.0832	0.0028	0.0728
Chr2	1480001	1490000	0.0041	0.1047	0.0038	0.0941	0.0035	0.0884	0.0028	0.0806	0.0033	0.0887	0.003	0.0738
Chr2	1490001	1500000	0.0027	0.0869	0.0033	0.1117	0.0036	0.1125	0.0027	0.0836	0.0029	0.0873	0.0031	0.0902
Chr2	1500001	1510000	0.0028	0.089	0.0027	0.0848	0.0035	0.1019	0.0031	0.0954	0.004	0.1232	0.0037	0.1037
Chr2	1510001	1520000	0.0027	0.0766	0.0025	0.0724	0.0032	0.0803	0.0029	0.0785	0.0026	0.0699	0.003	0.0736
Chr2	1520001	1530000	0.0028	0.0817	0.0034	0.1033	0.0033	0.0937	0.0033	0.0934	0.0029	0.0824	0.003	0.0794
Chr2	1530001	1540000	0.0028	0.0879	0.0029	0.0872	0.0033	0.0899	0.0036	0.1054	0.0034	0.0981	0.0036	0.0942
Chr2	1540001	1550000	0.0027	0.0859	0.0027	0.0837	0.0033	0.0932	0.0037	0.1083	0.0023	0.0673	0.0029	0.0767
Chr2	1550001	1560000	0.0027	0.0891	0.0032	0.0996	0.0033	0.0983	0.0034	0.0993	0.0027	0.0797	0.0032	0.0841
Chr2	1560001	1570000	0.0032	0.0978	0.0034	0.1041	0.0036	0.0963	0.0032	0.0936	0.0044	0.1211	0.0039	0.1014
Chr2	1570001	1580000	0.003	0.0893	0.0031	0.0898	0.0035	0.091	0.0031	0.0869	0.0029	0.0792	0.003	0.0788
Chr2	1580001	1590000	0.0032	0.0819	0.0033	0.0824	0.0036	0.0824	0.0024	0.0617	0.003	0.0719	0.0031	0.0724
Chr2	1590001	1600000	0.0025	0.0705	0.0029	0.0802	0.0029	0.0744	0.003	0.08	0.0033	0.0878	0.003	0.0712
Chr2	1600001	1610000	0.0029	0.0841	0.0033	0.0917	0.0035	0.0902	0.003	0.0822	0.0029	0.0755	0.0032	0.0746
Chr2	1610001	1620000	0.0027	0.0783	0.0026	0.0778	0.0032	0.0864	0.0023	0.0638	0.0028	0.0788	0.0037	0.0917
Chr2	1620001	1630000	0.0032	0.0968	0.0033	0.1025	0.0032	0.0945	0.003	0.0854	0.0028	0.0804	0.003	0.0805
Chr2	1630001	1640000	0.0029	0.0861	0.0032	0.0959	0.0036	0.1011	0.0033	0.0981	0.003	0.0865	0.0028	0.0756
Chr2	1640001	1650000	0.0037	0.096	0.0038	0.0987	0.0039	0.0933	0.003	0.0764	0.0032	0.0817	0.0032	0.0735
Chr2	1650001	1660000	0.0035	0.1025	0.0032	0.0927	0.0036	0.0945	0.0034	0.0981	0.003	0.084	0.0035	0.0877
Chr2	1660001	1670000	0.0034	0.0956	0.0033	0.0928	0.0037	0.0968	0.0024	0.0631	0.0031	0.0782	0.003	0.071
Chr2	1670001	1680000	0.0029	0.0861	0.0034	0.0981	0.0033	0.0888	0.0032	0.0932	0.0029	0.0838	0.0031	0.0811
Chr2	1680001	1690000	0.0036	0.0885	0.0039	0.0942	0.0035	0.0901	0.003	0.0812	0.0029	0.0792	0.003	0.0791
Chr2	1690001	1700000	0.0028	0.0806	0.0029	0.0838	0.003	0.083	0.0028	0.0794	0.0029	0.0797	0.0029	0.077
Chr2	1700001	1710000	0.0031	0.0812	0.0035	0.0923	0.0033	0.0796	0.0029	0.0745	0.0035	0.092	0.004	0.0887
Chr2	1710001	1720000	0.0032	0.0844	0.0031	0.0843	0.003	0.0741	0.0034	0.0916	0.0036	0.0992	0.0036	0.0837
Chr2	1720001	1730000	0.0034	0.1037	0.0036	0.1115	0.0044	0.1225	0.0033	0.0959	0.0033	0.095	0.0037	0.0944
Chr2	1730001	1740000	0.0028	0.0853	0.0031	0.0883	0.0033	0.0897	0.0033	0.0909	0.0026	0.072	0.003	0.0756
Chr2	1740001	1750000	0.0026	0.07	0.0027	0.0752	0.0032	0.0767	0.0034	0.0877	0.0034	0.0863	0.0035	0.0798
Chr2	1750001	1760000	0.0029	0.0837	0.0029	0.0879	0.0029	0.0785	0.0032	0.0903	0.003	0.0838	0.0028	0.0673
Chr2	1760001	1770000	0.0029	0.0779	0.0029	0.0741	0.0025	0.0625	0.0033	0.0899	0.0032	0.0842	0.0037	0.0897
Chr2	1770001	1780000	0.0039	0.1174	0.0038	0.117	0.004	0.1054	0.0029	0.0873	0.0027	0.0797	0.003	0.0753
Chr2	1780001	1790000	0.0027	0.0882	0.0032	0.1065	0.0032	0.0979	0.0035	0.1062	0.0029	0.0871	0.0035	0.0973
Chr2	1790001	1800000	0.0025	0.071	0.0029	0.0814	0.003	0.076	0.0034	0.093	0.0032	0.0861	0.0035	0.0839
Chr2	1800001	1810000	0.0029	0.0769	0.0029	0.0768	0.0031	0.0759	0.0033	0.0883	0.0026	0.0657	0.0032	0.0754
Chr2	1810001	1820000	0.0029	0.0859	0.0026	0.0771	0.0033	0.0889	0.0033	0.0956	0.0034	0.0976	0.0033	0.0885
Chr2	1820001	1830000	0.0031	0.0895	0.0029	0.0818	0.0034	0.0807	0.0037	0.0968	0.003	0.0806	0.0034	0.0784
Chr2	1830001	1840000	0.0033	0.0888	0.003	0.0845	0.0033	0.0781	0.0028	0.0753	0.0035	0.0928	0.0031	0.0712
Chr2	1840001	1850000	0.0039	0.1053	0.0037	0.0972	0.0039	0.0984	0.0032	0.0831	0.0037	0.1005	0.0035	0.087
Chr2	1850001	1860000	0.0031	0.0879	0.0033	0.0921	0.0031	0.0816	0.0032	0.0853	0.0032	0.0862	0.0034	0.0831
Chr2	1860001	1870000	0.003	0.0828	0.0034	0.0973	0.003	0.0765	0.0034	0.0869	0.0027	0.0737	0.003	0.066
Chr2	1870001	1880000	0.0037	0.1114	0.0033	0.1011	0.0036	0.1002	0.0029	0.0892	0.003	0.0884	0.0032	0.0864
Chr2	1880001	1890000	0.003	0.0846	0.003	0.0854	0.0029	0.0757	0.0028	0.0757	0.0032	0.0836	0.0037	0.087
Chr2	1890001	1900000	0.0031	0.0858	0.0033	0.089	0.0032	0.0779	0.0037	0.0923	0.0041	0.1095	0.0038	0.0951
Chr2	1900001	1910000	0.0029	0.0691	0.0028	0.0675	0.0031	0.0663	0.0028	0.0723	0.003	0.0774	0.0034	0.078
Chr2	1910001	1920000	0.0029	0.084	0.0025	0.0682	0.0031	0.0801	0.0032	0.0908	0.0035	0.0955	0.0035	0.0838
Chr2	1920001	1930000	0.0029	0.0799	0.0034	0.0882	0.0029	0.0701	0.003	0.0765	0.0027	0.0712	0.0028	0.0669
Chr2	1930001	1940000	0.0035	0.0998	0.0032	0.0908	0.0039	0.1023	0.0026	0.0727	0.0027	0.075	0.0028	0.0677
Chr2	1940001	1950000	0.0033	0.1121	0.0034	0.1044	0.0033	0.0991	0.0031	0.0954	0.0031	0.0906	0.003	0.0888
Chr2	1950001	1960000	0.0031	0.0845	0.0027	0.0754	0.0029	0.0687	0.0032	0.0835	0.0039	0.1011	0.0033	0.0772
Chr2	1960001	1970000	0.0028	0.0929	0.0034	0.1023	0.003	0.0918	0.0028	0.0895	0.003	0.0921	0.0026	0.0752
Chr2	1970001	1980000	0.0033	0.1023	0.004	0.1221	0.0038	0.1054	0.003	0.0864	0.0031	0.0817	0.0033	0.088
Chr2	1980001	1990000	0.0032	0.0927	0.0034	0.0971	0.0036	0.0963	0.0032	0.0901	0.003	0.0858	0.0032	0.0838
Chr2	1990001	2000000	0.0034	0.0941	0.0034	0.0898	0.0033	0.0906	0.0026	0.0702	0.0032	0.084	0.0033	0.0835
Chr2	2000001	2010000	0.0028	0.0815	0.004	0.1123	0.0037	0.0931	0.0031	0.0833	0.0025	0.0687	0.0029	0.0707
Chr2	2010001	2020000	0.0029	0.0949	0.0028	0.0856	0.003	0.0863	0.0032	0.0926	0.0032	0.0902	0.0036	0.0945
Chr2	2020001	2030000	0.0036	0.0956	0.0031	0.0851	0.0028	0.072	0.003	0.0744	0.003	0.0744	0.0031	0.0751
Chr2	2030001	2040000	0.0029	0.092	0.0029	0.089	0.0032	0.1004	0.0027	0.0789	0.0031	0.0948	0.003	0.0858
Chr2	2040001	2050000	0.0032	0.0923	0.0031	0.083	0.0035	0.0851	0.0032	0.0904	0.003	0.0823	0.0036	0.0857
Chr2	2050001	2060000	0.0033	0.0909	0.0035	0.093	0.0034	0.0804	0.0027	0.0746	0.0026	0.0681	0.0027	0.062
Chr2	2060001	2070000	0.0031	0.0917	0.0031	0.0959	0.003	0.086	0.003	0.0867	0.003	0.0894	0.0033	0.0941
Chr2	2070001	2080000	0.0032	0.0956	0.0025	0.0714	0.0032	0.0816	0.0028	0.0836	0.0029	0.0818	0.0029	0.072
Chr2	2080001	2090000	0.0031	0.0914	0.003	0.089	0.0029	0.074	0.0029	0.0811	0.0028	0.0763	0.0034	0.0842
Chr2	2090001	2100000	0.0032	0.0908	0.0035	0.0978	0.0032	0.0791	0.0026	0.0742	0.0033	0.0902	0.0031	0.0797
Chr2	2100001	2110000	0.0035	0.1027	0.0033	0.0898	0.0036	0.0948	0.0032	0.0934	0.003	0.0868	0.0037	0.0906
Chr2	2110001	2120000	0.0027	0.0801	0.003	0.0897	0.003	0.0819	0.0026	0.0738	0.0028	0.0846	0.0029	0.0767
Chr2	2120001	2130000	0.003	0.0878	0.0028	0.0758	0.0033	0.0818	0.0028	0.0797	0.0033	0.0858	0.0033	0.0785
Chr2	2130001	2140000	0.0032	0.0987	0.0038	0.1118	0.0033	0.0934	0.003	0.0867	0.003	0.0814	0.0031	0.0826
Chr2	2140001	2150000	0.0036	0.1198	0.0033	0.1082	0.0029	0.0908	0.0028	0.0897	0.003	0.0949	0.0033	0.0982
Chr2	2150001	2160000	0.0033	0.0892	0.0037	0.0947	0.0027	0.0626	0.0023	0.0618	0.0026	0.0651	0.0034	0.077
Chr2	2160001	2170000	0.003	0.079	0.0028	0.0724	0.0031	0.0677	0.003	0.0711	0.0027	0.0662	0.0032	0.0661
Chr2	2170001	2180000	0.0027	0.0828	0.0029	0.0868	0.0031	0.089	0.0024	0.071	0.0024	0.07	0.0031	0.0792
Chr2	2180001	2190000	0.0023	0.0672	0.0029	0.0868	0.003	0.0755	0.003	0.0783	0.0026	0.0711	0.0029	0.0697
Chr2	2190001	2200000	0.0024	0.0743	0.0027	0.0872	0.0032	0.0922	0.0026	0.0745	0.0031	0.0886	0.0029	0.0762
Chr2	2200001	2210000	0.0031	0.0914	0.0027	0.0832	0.0031	0.0888	0.0029	0.0863	0.0031	0.0965	0.0037	0.103
Chr2	2210001	2220000	0.0037	0.1059	0.0035	0.1045	0.0042	0.1098	0.003	0.0895	0.0027	0.0818	0.0031	0.0851
Chr2	2220001	2230000	0.0029	0.0906	0.0031	0.0962	0.0033	0.0966	0.0023	0.0669	0.0028	0.0814	0.0028	0.0748
Chr2	2230001	2240000	0.0027	0.0853	0.0036	0.1116	0.0032	0.0934	0.0024	0.073	0.0028	0.0871	0.0029	0.0814
Chr2	2240001	2250000	0.0032	0.0879	0.0034	0.0923	0.0039	0.1048	0.0028	0.0761	0.003	0.0768	0.0026	0.0686
Chr2	2250001	2260000	0.0034	0.0946	0.0028	0.0786	0.0035	0.0908	0.0032	0.0904	0.003	0.0837	0.003	0.0784
Chr2	2260001	2270000	0.0039	0.1002	0.0035	0.0882	0.0036	0.0811	0.0024	0.0636	0.0024	0.0637	0.0027	0.0599
Chr2	2270001	2280000	0.0034	0.1005	0.0033	0.0938	0.0034	0.0943	0.0029	0.0802	0.0024	0.0653	0.003	0.0776
Chr2	2280001	2290000	0.0031	0.0941	0.0038	0.1172	0.004	0.1143	0.0024	0.0698	0.003	0.0851	0.0029	0.0762
Chr2	2290001	2300000	0.0031	0.0863	0.003	0.0872	0.0031	0.0794	0.0031	0.0815	0.0036	0.1014	0.0035	0.0789
Chr2	2300001	2310000	0.0027	0.0877	0.0025	0.079	0.0032	0.0934	0.0033	0.0913	0.0036	0.1007	0.0037	0.0954
Chr2	2310001	2320000	0.0027	0.0817	0.0038	0.1129	0.0035	0.0945	0.0032	0.0928	0.0027	0.0749	0.0028	0.073
Chr2	2320001	2330000	0.0032	0.0907	0.0037	0.1034	0.0035	0.0922	0.0032	0.0915	0.0025	0.0716	0.0029	0.0792
Chr2	2330001	2340000	0.0028	0.0761	0.0027	0.0754	0.003	0.0751	0.0029	0.0795	0.0034	0.0927	0.0033	0.0795
Chr2	2340001	2350000	0.0029	0.08	0.0029	0.0809	0.0033	0.0839	0.0031	0.0791	0.0027	0.0728	0.0037	0.0866
Chr2	2350001	2360000	0.0025	0.066	0.0029	0.0777	0.0032	0.0716	0.0028	0.0694	0.0033	0.0829	0.0032	0.0719
Chr2	2360001	2370000	0.0027	0.0894	0.0027	0.0944	0.0032	0.1037	0.0027	0.0871	0.0028	0.088	0.0032	0.0987
Chr2	2370001	2380000	0.0031	0.0909	0.0036	0.1026	0.0036	0.0932	0.003	0.0839	0.0034	0.0959	0.0034	0.087
Chr2	2380001	2390000	0.0031	0.0886	0.0032	0.0893	0.003	0.0776	0.0029	0.0797	0.0034	0.0905	0.0037	0.0905
Chr2	2390001	2400000	0.0032	0.1023	0.0033	0.1005	0.0039	0.1143	0.0034	0.101	0.0029	0.0863	0.0033	0.0921
Chr2	2400001	2410000	0.003	0.0951	0.0028	0.0839	0.0032	0.0889	0.0028	0.0789	0.0036	0.0991	0.0036	0.0945
Chr2	2410001	2420000	0.0038	0.1061	0.0037	0.1053	0.0037	0.0998	0.0025	0.0631	0.0028	0.0736	0.0028	0.0671
Chr2	2420001	2430000	0.0041	0.1134	0.0035	0.0972	0.0035	0.0875	0.0033	0.0887	0.0031	0.0853	0.0037	0.0891
Chr2	2430001	2440000	0.0028	0.0779	0.0029	0.0833	0.0028	0.0713	0.0032	0.0865	0.0034	0.0908	0.0031	0.0718
Chr2	2440001	2450000	0.0025	0.0791	0.0031	0.092	0.0031	0.0843	0.0035	0.1026	0.0033	0.0984	0.0039	0.1042
Chr2	2450001	2460000	0.0035	0.108	0.0036	0.1031	0.0035	0.0977	0.0027	0.0778	0.0029	0.0837	0.0027	0.0725
Chr2	2460001	2470000	0.0033	0.0961	0.0038	0.1114	0.0038	0.1009	0.003	0.0856	0.003	0.0848	0.0034	0.0828
Chr2	2470001	2480000	0.003	0.0772	0.0026	0.0606	0.0033	0.0711	0.003	0.071	0.0028	0.0685	0.0029	0.0599
Chr2	2480001	2490000	0.0034	0.1002	0.0026	0.0758	0.0028	0.0736	0.0028	0.0776	0.0027	0.0773	0.0027	0.0666
Chr2	2490001	2500000	0.0037	0.0978	0.0039	0.1062	0.0038	0.0926	0.0036	0.0914	0.0032	0.0799	0.0034	0.0783
Chr2	2500001	2510000	0.0033	0.0985	0.003	0.0872	0.0033	0.0884	0.003	0.0815	0.0033	0.0921	0.0029	0.0723
Chr2	2510001	2520000	0.0039	0.1153	0.0037	0.1118	0.0034	0.0948	0.0028	0.0817	0.0024	0.0707	0.0029	0.0759
Chr2	2520001	2530000	0.0034	0.1003	0.0034	0.0984	0.0037	0.0916	0.003	0.0922	0.003	0.0833	0.0033	0.0834
Chr2	2530001	2540000	0.0029	0.0867	0.0028	0.0842	0.0029	0.0842	0.0024	0.069	0.0028	0.0787	0.0029	0.0763
Chr2	2540001	2550000	0.0036	0.11	0.0032	0.1005	0.0036	0.1032	0.0031	0.0897	0.0034	0.1044	0.0032	0.0885
Chr2	2550001	2560000	0.0029	0.0913	0.0031	0.0956	0.0035	0.1004	0.0027	0.0758	0.003	0.0865	0.0032	0.0866
Chr2	2560001	2570000	0.0029	0.0873	0.0032	0.0908	0.0033	0.0903	0.0038	0.101	0.0041	0.1043	0.0043	0.1041
Chr2	2570001	2580000	0.0031	0.09	0.0027	0.0816	0.0032	0.0908	0.0028	0.0759	0.0028	0.0791	0.003	0.0779
Chr2	2580001	2590000	0.0031	0.0906	0.0029	0.0902	0.0029	0.0797	0.0027	0.0723	0.0035	0.0996	0.0036	0.0908
Chr2	2590001	2600000	0.003	0.0848	0.0029	0.0841	0.0033	0.0895	0.0029	0.0822	0.0033	0.0939	0.0031	0.0803
Chr2	2600001	2610000	0.003	0.0823	0.003	0.0778	0.0028	0.0711	0.0031	0.0732	0.0022	0.0561	0.0029	0.0677
Chr2	2610001	2620000	0.0031	0.0868	0.0027	0.0796	0.0031	0.08	0.0027	0.0733	0.0028	0.0783	0.0032	0.0761
Chr2	2620001	2630000	0.0039	0.1155	0.0037	0.1043	0.0035	0.0934	0.0029	0.0846	0.0026	0.0748	0.003	0.0771
Chr2	2630001	2640000	0.0029	0.0802	0.0027	0.0805	0.0032	0.0838	0.0029	0.0769	0.0031	0.0867	0.0031	0.0757
Chr2	2640001	2650000	0.0032	0.0936	0.0036	0.0982	0.0038	0.0962	0.0029	0.0831	0.0029	0.0809	0.003	0.0723
Chr2	2650001	2660000	0.0032	0.0897	0.0037	0.1005	0.0026	0.0667	0.0032	0.0781	0.0034	0.0852	0.0033	0.0738
Chr2	2660001	2670000	0.0029	0.0767	0.0031	0.0907	0.003	0.0742	0.003	0.0849	0.0026	0.0736	0.0025	0.0619
Chr2	2670001	2680000	0.0052	0.1236	0.0047	0.1373	0.0041	0.0973	0.0028	0.0823	0.0033	0.1107	0.0034	0.0793
Chr2	2680001	2690000	0.0035	0.0982	0.0035	0.1082	0.0037	0.1034	0.0027	0.0762	0.0025	0.0684	0.0031	0.0748
Chr2	2690001	2700000	0.0038	0.1151	0.0025	0.0818	0.0042	0.128	0.0031	0.0923	0.0032	0.0979	0.0031	0.0874
Chr2	2700001	2710000	0.003	0.0778	0.0034	0.0907	0.0033	0.0777	0.0026	0.0683	0.0027	0.0722	0.0029	0.0659
Chr2	2710001	2720000	0.0032	0.0961	0.0034	0.0966	0.0038	0.1041	0.0028	0.0801	0.003	0.0853	0.003	0.0799
Chr2	2720001	2730000	0.0031	0.0851	0.0033	0.0905	0.003	0.0728	0.0039	0.1045	0.0032	0.0868	0.0038	0.088
Chr2	2730001	2740000	0.003	0.0885	0.0031	0.0962	0.0036	0.1024	0.0032	0.0915	0.0035	0.0998	0.0036	0.0947
Chr2	2740001	2750000	0.0038	0.1181	0.0035	0.1091	0.0041	0.1117	0.0027	0.0837	0.003	0.0835	0.0036	0.0938
Chr2	2750001	2760000	0.0027	0.086	0.0029	0.0918	0.0029	0.0827	0.0034	0.0936	0.004	0.1171	0.0036	0.0943
Chr2	2760001	2770000	0.0033	0.0942	0.003	0.0836	0.0029	0.0739	0.0029	0.0792	0.0027	0.0695	0.0027	0.0657
Chr2	2770001	2780000	0.0029	0.083	0.0033	0.0941	0.0028	0.077	0.0031	0.087	0.0029	0.0776	0.0027	0.0727
Chr2	2780001	2790000	0.0033	0.0989	0.0037	0.1088	0.0039	0.1023	0.0029	0.0795	0.0031	0.0879	0.0037	0.0933
Chr2	2790001	2800000	0.0028	0.079	0.0029	0.0768	0.0029	0.0703	0.0026	0.0737	0.003	0.0778	0.0031	0.0714
Chr2	2800001	2810000	0.0028	0.0857	0.0038	0.1115	0.0038	0.1064	0.003	0.0875	0.0024	0.0703	0.0029	0.0773
Chr2	2810001	2820000	0.0031	0.103	0.0038	0.1205	0.0037	0.114	0.0024	0.0753	0.0027	0.0838	0.0031	0.0862
Chr2	2820001	2830000	0.0027	0.0843	0.0032	0.0996	0.003	0.0919	0.0031	0.0894	0.0031	0.0947	0.0032	0.0871
Chr2	2830001	2840000	0.0027	0.0769	0.0031	0.088	0.0031	0.0777	0.003	0.0824	0.0025	0.0684	0.003	0.0753
Chr2	2840001	2850000	0.0035	0.1011	0.0037	0.1071	0.0039	0.1061	0.0029	0.0809	0.0035	0.0947	0.0032	0.0787
Chr2	2850001	2860000	0.0023	0.069	0.0029	0.0842	0.0032	0.0847	0.0036	0.0995	0.0034	0.0902	0.0031	0.0788
Chr2	2860001	2870000	0.0025	0.0802	0.0032	0.0915	0.0034	0.0977	0.0026	0.0783	0.0028	0.0801	0.0028	0.0766
Chr2	2870001	2880000	0.0046	0.1204	0.0032	0.1005	0.0038	0.0813	0.0035	0.0954	0.0026	0.0776	0.0031	0.0606
Chr2	2880001	2890000	0.0033	0.103	0.0034	0.1084	0.0035	0.0998	0.0032	0.0929	0.0024	0.0701	0.0032	0.0842
Chr2	2890001	2900000	0.0032	0.1026	0.0033	0.0961	0.0034	0.0973	0.0034	0.0992	0.003	0.0877	0.0034	0.0898
Chr2	2900001	2910000	0.0026	0.0799	0.0037	0.1111	0.0034	0.1022	0.0026	0.0753	0.0032	0.0977	0.0034	0.094
Chr2	2910001	2920000	0.0034	0.1098	0.0032	0.0998	0.004	0.1218	0.0035	0.1076	0.0034	0.0978	0.0033	0.0901
Chr2	2920001	2930000	0.003	0.0972	0.0039	0.119	0.0042	0.1206	0.0023	0.0697	0.0033	0.0989	0.0033	0.0915
Chr2	2930001	2940000	0.0032	0.1037	0.0039	0.119	0.0041	0.1179	0.0031	0.0944	0.003	0.092	0.0031	0.0864
Chr2	2940001	2950000	0.0032	0.0964	0.0033	0.1064	0.0032	0.0922	0.0023	0.072	0.0031	0.0909	0.0029	0.0764
Chr2	2950001	2960000	0.0035	0.1122	0.0034	0.1086	0.0036	0.1059	0.0027	0.0809	0.003	0.0899	0.0027	0.0768
Chr2	2960001	2970000	0.0031	0.1036	0.0037	0.1185	0.0037	0.1102	0.0032	0.0983	0.0035	0.1016	0.0033	0.0966
Chr2	2970001	2980000	0.0037	0.1278	0.0034	0.1148	0.0039	0.1217	0.0033	0.1024	0.0033	0.0998	0.0037	0.1056
Chr2	2980001	2990000	0.0032	0.1127	0.003	0.1141	0.0031	0.1066	0.0025	0.0837	0.0027	0.0885	0.0028	0.0887
Chr2	2990001	3000000	0.0035	0.1146	0.0032	0.1025	0.0033	0.0956	0.0022	0.0669	0.0026	0.0782	0.0028	0.0754
Chr2	3000001	3010000	0.0057	0.1362	0.0029	0.0978	0.0035	0.0659	0.0028	0.0706	0.0034	0.0956	0.0035	0.0674
Chr2	3010001	3020000	0.0111	0.186	0.0041	0.1373	0.0034	0.0457	0.002	0.0397	0.0028	0.0839	0.0025	0.0357
Chr2	3020001	3030000	0.0034	0.1077	0.0031	0.1157	0.0034	0.0838	0.0034	0.1043	0.0035	0.1155	0.004	0.0881
Chr2	3030001	3040000	0.0048	0.0957	0.0023	0.0609	0.0032	0.0617	0.0026	0.063	0.0031	0.071	0.003	0.0529
Chr2	3040001	3050000	0.0031	0.0865	0.0041	0.1128	0.0034	0.0838	0.0033	0.0909	0.0032	0.0878	0.0033	0.0767
Chr2	3050001	3060000	0.0038	0.1143	0.0036	0.1086	0.0038	0.0999	0.0035	0.0996	0.0039	0.1069	0.0047	0.1167
Chr2	3060001	3070000	0.0041	0.1191	0.0034	0.0969	0.0035	0.0881	0.003	0.0853	0.003	0.086	0.0031	0.0769
Chr2	3070001	3080000	0.003	0.0928	0.0035	0.1038	0.0037	0.104	0.0028	0.0793	0.0035	0.0945	0.0038	0.0937
Chr2	3080001	3090000	0.0033	0.0965	0.0039	0.1083	0.0034	0.087	0.0025	0.0702	0.0024	0.0672	0.003	0.0715
Chr2	3090001	3100000	0.0034	0.0994	0.0033	0.0984	0.0034	0.089	0.0032	0.0879	0.0028	0.081	0.003	0.0752
Chr2	3100001	3110000	0.003	0.0903	0.0034	0.1057	0.0038	0.1014	0.0035	0.1019	0.0026	0.0749	0.0032	0.0836
Chr2	3110001	3120000	0.0034	0.0995	0.0044	0.1286	0.0034	0.0909	0.0029	0.0832	0.0031	0.086	0.0031	0.0767
Chr2	3120001	3130000	0.0037	0.1038	0.0028	0.0887	0.0034	0.0936	0.0037	0.106	0.0034	0.0986	0.0042	0.1077
Chr2	3130001	3140000	0.0033	0.1062	0.0036	0.1141	0.0031	0.0958	0.0026	0.0733	0.0029	0.0844	0.0032	0.0849
Chr2	3140001	3150000	0.0031	0.105	0.0033	0.1083	0.0038	0.1137	0.0029	0.0861	0.003	0.0896	0.0031	0.0842
Chr2	3150001	3160000	0.0031	0.1027	0.0029	0.0957	0.0037	0.113	0.0033	0.0927	0.0032	0.0897	0.0034	0.0943
Chr2	3160001	3170000	0.0036	0.1071	0.0031	0.0962	0.0032	0.0883	0.0029	0.0814	0.0027	0.0682	0.003	0.0743
Chr2	3170001	3180000	0.0029	0.0904	0.0034	0.1054	0.0033	0.0964	0.0026	0.0755	0.0031	0.0895	0.0027	0.0727
Chr2	3180001	3190000	0.0026	0.0821	0.0031	0.0951	0.0028	0.0815	0.0025	0.0762	0.0028	0.082	0.003	0.0811
Chr2	3190001	3200000	0.003	0.0857	0.0024	0.0737	0.0033	0.0947	0.0038	0.1099	0.0031	0.089	0.0037	0.1004
Chr2	3200001	3210000	0.0027	0.0845	0.0034	0.105	0.0035	0.1041	0.0033	0.0931	0.003	0.0859	0.0036	0.0929
Chr2	3210001	3220000	0.003	0.0959	0.0035	0.1124	0.0037	0.114	0.003	0.0838	0.0033	0.0909	0.0033	0.0894
Chr2	3220001	3230000	0.0039	0.1272	0.0038	0.1259	0.0044	0.1365	0.0028	0.0939	0.0029	0.0889	0.0033	0.1026
Chr2	3230001	3240000	0.003	0.0963	0.0039	0.1172	0.0033	0.0953	0.0029	0.084	0.0032	0.0906	0.0035	0.0933
Chr2	3240001	3250000	0.0033	0.1075	0.0033	0.1075	0.0029	0.0912	0.0034	0.1054	0.0031	0.0954	0.0033	0.0976
Chr2	3250001	3260000	0.0027	0.0847	0.0034	0.1083	0.0036	0.1044	0.0027	0.0832	0.0028	0.0874	0.003	0.0853
Chr2	3260001	3270000	0.009	0.1442	0.0058	0.1317	0.0048	0.1111	0.0038	0.0996	0.0045	0.1275	0.0043	0.1069
Chr2	3270001	3280000	0.0035	0.1024	0.0037	0.1168	0.0036	0.1005	0.0027	0.0746	0.0036	0.0986	0.0034	0.0874
Chr2	3280001	3290000	0.0028	0.0845	0.0029	0.0865	0.0031	0.0881	0.0027	0.0728	0.0031	0.0856	0.0028	0.0725
Chr2	3290001	3300000	0.0028	0.0906	0.0028	0.0891	0.0034	0.1012	0.0026	0.0726	0.0024	0.0702	0.0028	0.0706
Chr2	3300001	3310000	0.003	0.1022	0.0027	0.0912	0.0032	0.1054	0.0028	0.0906	0.0028	0.0839	0.0032	0.0946
Chr2	3310001	3320000	0.0027	0.0864	0.0032	0.0998	0.0032	0.1005	0.004	0.117	0.0034	0.1026	0.0038	0.1048
Chr2	3320001	3330000	0.0032	0.1036	0.0029	0.0907	0.0036	0.1083	0.0028	0.0827	0.0025	0.0736	0.0029	0.0808
Chr2	3330001	3340000	0.0036	0.119	0.0033	0.1101	0.0036	0.1116	0.0028	0.0881	0.0024	0.0754	0.0029	0.0843
Chr2	3340001	3350000	0.0032	0.1099	0.0033	0.1135	0.0031	0.0963	0.0026	0.084	0.0031	0.098	0.0033	0.0971
Chr2	3350001	3360000	0.0028	0.0925	0.003	0.1018	0.0034	0.1085	0.0033	0.0953	0.0029	0.085	0.0034	0.0921
Chr2	3360001	3370000	0.0028	0.0909	0.0029	0.0963	0.0034	0.102	0.0028	0.084	0.0033	0.0973	0.0036	0.1001
Chr2	3370001	3380000	0.0028	0.0902	0.003	0.0955	0.0033	0.1016	0.003	0.0925	0.0034	0.1001	0.0036	0.1037
Chr2	3380001	3390000	0.0033	0.1084	0.0038	0.126	0.0035	0.1067	0.0033	0.0979	0.0033	0.095	0.0031	0.0885
Chr2	3390001	3400000	0.0027	0.0881	0.003	0.1037	0.0035	0.1111	0.0033	0.1011	0.0035	0.1063	0.0033	0.0936
Chr2	3400001	3410000	0.0032	0.089	0.0033	0.0883	0.0038	0.1025	0.0029	0.0722	0.0027	0.0685	0.0027	0.0649
Chr2	3410001	3420000	0.0038	0.1033	0.0036	0.095	0.0035	0.0927	0.0029	0.0775	0.0027	0.0708	0.0027	0.0685
Chr2	3420001	3430000	0.0036	0.1115	0.0038	0.109	0.0038	0.1076	0.0029	0.0864	0.0028	0.0817	0.0031	0.0858
Chr2	3430001	3440000	0.0058	0.1501	0.0037	0.1147	0.0033	0.0984	0.0027	0.0858	0.0026	0.0849	0.003	0.0864
Chr2	3440001	3450000	0.01	0.194	0.0044	0.1482	0.0035	0.0977	0.0034	0.0974	0.0029	0.0918	0.0033	0.0844
Chr2	3450001	3460000	0.0071	0.1714	0.0041	0.1098	0.0038	0.102	0.0035	0.0974	0.0034	0.0963	0.0037	0.0899
Chr2	3460001	3470000	0.0097	0.19	0.005	0.1738	0.004	0.142	0.0032	0.0939	0.0039	0.1431	0.004	0.1396
Chr2	3470001	3480000	0.0028	0.1139	0.0034	0.1407	0.0038	0.1722	0.0037	0.1432	0.0033	0.1352	0.0039	0.1803
Chr2	3480001	3490000	0.0028	0.0887	0.0028	0.0908	0.0029	0.0894	0.0032	0.0927	0.003	0.0853	0.0035	0.0981
Chr2	3490001	3500000	0.0036	0.1166	0.0038	0.1239	0.0037	0.1099	0.0027	0.0802	0.0027	0.0793	0.0033	0.0899
Chr2	3500001	3510000	0.0028	0.0944	0.0034	0.1051	0.0031	0.0928	0.0027	0.0809	0.0032	0.0956	0.0036	0.095
Chr2	3510001	3520000	0.0029	0.0903	0.0027	0.0814	0.0031	0.0835	0.003	0.0906	0.0033	0.091	0.0032	0.0821
Chr2	3520001	3530000	0.0027	0.092	0.0034	0.1111	0.0032	0.1005	0.0029	0.0891	0.0031	0.0933	0.0034	0.1001
Chr2	3530001	3540000	0.0026	0.0808	0.0035	0.1088	0.0033	0.1014	0.0028	0.0832	0.0026	0.082	0.0035	0.0973
Chr2	3540001	3550000	0.0033	0.1054	0.0037	0.116	0.004	0.1176	0.0027	0.0812	0.0032	0.0947	0.0028	0.0791
Chr2	3550001	3560000	0.0032	0.1024	0.0033	0.1058	0.0036	0.1113	0.003	0.0894	0.0037	0.1107	0.0034	0.096
Chr2	3560001	3570000	0.0027	0.0925	0.0032	0.1107	0.0032	0.1054	0.0029	0.0942	0.0036	0.1161	0.0037	0.1081
Chr2	3570001	3580000	0.003	0.0969	0.0033	0.1047	0.0036	0.108	0.0032	0.0999	0.0026	0.0824	0.0034	0.0992
Chr2	3580001	3590000	0.0039	0.1188	0.0033	0.0993	0.0036	0.103	0.0034	0.0977	0.0027	0.0782	0.0034	0.0946
Chr2	3590001	3600000	0.0035	0.1082	0.0041	0.1272	0.0043	0.1251	0.0034	0.1037	0.0034	0.1049	0.0041	0.1149
Chr2	3600001	3610000	0.0028	0.0919	0.0038	0.1261	0.0039	0.1151	0.0024	0.0741	0.0031	0.0961	0.0032	0.089
Chr2	3610001	3620000	0.003	0.0962	0.0031	0.1035	0.0036	0.1146	0.0025	0.0778	0.0025	0.0781	0.0032	0.0916
Chr2	3620001	3630000	0.0108	0.1605	0.0026	0.0729	0.0041	0.0445	0.0034	0.056	0.0035	0.0833	0.0037	0.0442
Chr2	3630001	3640000	0.0271	0.1761	0.0372	0.3	0.0042	0.0326	0.003	0.0276	0	0	0.0043	0.037
Chr2	3640001	3650000	0.0061	0.1223	0.004	0.1077	0.004	0.0616	0.0029	0.0656	0.0037	0.0917	0.0034	0.0538
Chr2	3650001	3660000	0.0039	0.1127	0.0032	0.1152	0.0032	0.0811	0.0029	0.0844	0.0028	0.0967	0.003	0.0728
Chr2	3660001	3670000	0.0064	0.1212	0.0038	0.0876	0.0037	0.0657	0.003	0.0679	0.003	0.0755	0.0038	0.068
Chr2	3670001	3680000	0.0033	0.0962	0.0031	0.0912	0.0035	0.092	0.0034	0.0922	0.0041	0.1124	0.0034	0.0848
Chr2	3680001	3690000	0.0031	0.0925	0.0026	0.0722	0.003	0.081	0.0028	0.084	0.0031	0.0896	0.0035	0.0908
Chr2	3690001	3700000	0.0041	0.1153	0.0035	0.0966	0.003	0.0755	0.0031	0.082	0.0033	0.0866	0.0045	0.1017
Chr2	3700001	3710000	0.0032	0.0852	0.0035	0.0907	0.0031	0.073	0.003	0.0769	0.0027	0.066	0.0033	0.0758
Chr2	3710001	3720000	0.003	0.0859	0.0028	0.0795	0.0032	0.082	0.0033	0.0853	0.003	0.0803	0.0032	0.075
Chr2	3720001	3730000	0.0033	0.0943	0.0038	0.1127	0.0039	0.1081	0.0035	0.096	0.0038	0.1009	0.0039	0.1004
Chr2	3730001	3740000	0.0031	0.0949	0.0031	0.0916	0.0029	0.0812	0.0031	0.0867	0.0034	0.0955	0.0032	0.0866
Chr2	3740001	3750000	0.0034	0.1094	0.004	0.1253	0.0037	0.1119	0.0026	0.0775	0.0032	0.0903	0.0037	0.103
Chr2	3750001	3760000	0.0031	0.0996	0.0032	0.0993	0.0037	0.1057	0.0026	0.0762	0.0029	0.0862	0.0029	0.0778
Chr2	3760001	3770000	0.003	0.0787	0.0029	0.0735	0.0031	0.071	0.0026	0.0727	0.0029	0.0783	0.0033	0.078
Chr2	3770001	3780000	0.0034	0.1036	0.0031	0.094	0.0038	0.1045	0.0026	0.0776	0.0034	0.0909	0.0027	0.0702
Chr2	3780001	3790000	0.0038	0.104	0.0034	0.1055	0.0028	0.0719	0.0026	0.0735	0.0024	0.067	0.0027	0.0642
Chr2	3790001	3800000	0.0345	0.24	0.0295	0.16	0.0051	0.0393	0.0028	0.0299	0	0	0.0042	0.0401
Chr2	3800001	3810000	0.0053	0.1609	0.004	0.1426	0.0044	0.1214	0.0028	0.0817	0.0028	0.0896	0.0032	0.0785
Chr2	3810001	3820000	0.0376	0.2517	0.0294	0.2857	0.0049	0.0374	0.0033	0.0323	0	0	0.0031	0.0297
Chr2	3820001	3830000	0.0034	0.1129	0.0037	0.1158	0.0037	0.102	0.003	0.0903	0.0034	0.0983	0.0035	0.088
Chr2	3830001	3840000	0.0029	0.0877	0.0025	0.0779	0.0033	0.0924	0.0031	0.0904	0.0026	0.0726	0.0036	0.0997
Chr2	3840001	3850000	0.003	0.0968	0.0029	0.0865	0.0032	0.0972	0.0033	0.1017	0.0032	0.0932	0.0032	0.0883
Chr2	3850001	3860000	0.0027	0.0892	0.0033	0.1061	0.0031	0.0903	0.0037	0.1142	0.0032	0.0971	0.0036	0.0957
Chr2	3860001	3870000	0.0031	0.1046	0.003	0.0988	0.0031	0.0973	0.0028	0.0888	0.0034	0.106	0.0034	0.1006
Chr2	3870001	3880000	0.003	0.0947	0.0027	0.0848	0.0032	0.0857	0.0037	0.1026	0.0027	0.0736	0.0029	0.0716
Chr2	3880001	3890000	0.0032	0.0888	0.0031	0.0816	0.003	0.0746	0.0031	0.08	0.0028	0.0697	0.0032	0.0694
Chr2	3890001	3900000	0.0033	0.0988	0.0032	0.0962	0.0036	0.0994	0.0027	0.0783	0.0032	0.0879	0.003	0.0782
Chr2	3900001	3910000	0.0031	0.0875	0.0034	0.0976	0.0036	0.0924	0.0031	0.0862	0.0028	0.0775	0.0031	0.0722
Chr2	3910001	3920000	0.003	0.0899	0.0034	0.1051	0.003	0.0764	0.0025	0.0711	0.0024	0.0689	0.0028	0.0682
Chr2	3920001	3930000	0.0027	0.085	0.0026	0.0796	0.0029	0.0825	0.0033	0.0938	0.0036	0.1018	0.0034	0.0832
Chr2	3930001	3940000	0.0038	0.1085	0.0029	0.0826	0.0037	0.0897	0.0027	0.0723	0.0028	0.0762	0.0028	0.0633
Chr2	3940001	3950000	0.0024	0.072	0.0029	0.0886	0.0032	0.0904	0.0026	0.0764	0.0031	0.0912	0.0029	0.0757
Chr2	3950001	3960000	0.0033	0.091	0.0034	0.097	0.0042	0.1029	0.0033	0.0858	0.0034	0.0886	0.0036	0.0839
Chr2	3960001	3970000	0.0031	0.0885	0.0029	0.0824	0.0036	0.0995	0.0028	0.079	0.0025	0.07	0.0029	0.0749
Chr2	3970001	3980000	0.0034	0.1042	0.0028	0.0854	0.0035	0.0991	0.0032	0.093	0.0033	0.0964	0.0031	0.0838
Chr2	3980001	3990000	0.0033	0.0952	0.0027	0.0826	0.003	0.084	0.0031	0.0886	0.0036	0.1022	0.0034	0.0853
Chr2	3990001	4000000	0.0034	0.0953	0.0031	0.0821	0.0032	0.0839	0.0035	0.0951	0.003	0.078	0.0032	0.0785
Chr2	4000001	4010000	0.0038	0.1098	0.0033	0.0992	0.0036	0.1003	0.0032	0.094	0.003	0.086	0.0034	0.0897
Chr2	4010001	4020000	0.003	0.0934	0.0035	0.1072	0.0035	0.0951	0.0028	0.0842	0.003	0.0865	0.0028	0.0735
Chr2	4020001	4030000	0.0025	0.0768	0.0028	0.0846	0.0028	0.0773	0.0029	0.0817	0.0027	0.0771	0.0033	0.0826
Chr2	4030001	4040000	0.0028	0.0884	0.0032	0.1013	0.003	0.0887	0.003	0.0852	0.003	0.0867	0.0033	0.0917
Chr2	4040001	4050000	0.0031	0.0943	0.0032	0.091	0.0034	0.0923	0.0031	0.088	0.0026	0.0736	0.0034	0.0862
Chr2	4050001	4060000	0.0031	0.0947	0.0032	0.1003	0.0033	0.0934	0.0028	0.0815	0.0027	0.0802	0.0027	0.0724
Chr2	4060001	4070000	0.0032	0.0952	0.0036	0.1062	0.0036	0.0946	0.0028	0.0758	0.0027	0.0711	0.0033	0.0815
Chr2	4070001	4080000	0.0031	0.0912	0.0032	0.0945	0.0031	0.0767	0.0034	0.0922	0.0023	0.0642	0.003	0.0699
Chr2	4080001	4090000	0.0032	0.089	0.0032	0.092	0.0031	0.0836	0.0029	0.0808	0.0026	0.0721	0.0031	0.0811
Chr2	4090001	4100000	0.0028	0.0861	0.0028	0.0802	0.0032	0.0861	0.0031	0.0902	0.0032	0.0921	0.0036	0.093
Chr2	4100001	4110000	0.0041	0.1293	0.0031	0.099	0.0043	0.1245	0.0028	0.0819	0.0029	0.086	0.0032	0.0882
Chr2	4110001	4120000	0.0036	0.1047	0.0037	0.111	0.0042	0.1182	0.0023	0.0679	0.0031	0.0934	0.0033	0.0877
Chr2	4120001	4130000	0.0032	0.0988	0.003	0.0896	0.0034	0.0947	0.0025	0.0714	0.0032	0.0887	0.0028	0.0778
Chr2	4130001	4140000	0.0025	0.0684	0.0028	0.0824	0.0031	0.0731	0.0027	0.0727	0.0028	0.0758	0.0035	0.0826
Chr2	4140001	4150000	0.0025	0.0659	0.0028	0.0728	0.0033	0.0765	0.003	0.082	0.0028	0.0717	0.0029	0.0671
Chr2	4150001	4160000	0.0035	0.0971	0.0033	0.098	0.0033	0.0868	0.0027	0.0706	0.0028	0.075	0.0031	0.0801
Chr2	4160001	4170000	0.0029	0.0826	0.0028	0.0797	0.0031	0.0809	0.0025	0.0677	0.0028	0.0728	0.0029	0.0735
Chr2	4170001	4180000	0.0029	0.0794	0.003	0.0798	0.0034	0.08	0.0033	0.0872	0.003	0.0811	0.0032	0.0783
Chr2	4180001	4190000	0.0033	0.0802	0.0034	0.0858	0.0036	0.0785	0.0034	0.081	0.0028	0.0668	0.0031	0.0641
Chr2	4190001	4200000	0.0034	0.0989	0.0035	0.102	0.0037	0.0963	0.003	0.0783	0.0027	0.0727	0.0029	0.0686
Chr2	4200001	4210000	0.003	0.079	0.0032	0.0852	0.003	0.0764	0.0031	0.0846	0.0036	0.0911	0.0032	0.0797
Chr2	4210001	4220000	0.0035	0.1039	0.0026	0.0825	0.0036	0.094	0.0027	0.0799	0.0033	0.0923	0.0033	0.0814
Chr2	4220001	4230000	0.003	0.0915	0.003	0.0868	0.0031	0.0858	0.0023	0.0653	0.0032	0.0929	0.0028	0.0738
Chr2	4230001	4240000	0.0026	0.082	0.0028	0.0843	0.0032	0.0934	0.0031	0.093	0.0033	0.0972	0.0033	0.0927
Chr2	4240001	4250000	0.0035	0.1086	0.0033	0.105	0.0036	0.1064	0.0029	0.0879	0.0032	0.0958	0.0034	0.0956
Chr2	4250001	4260000	0.0031	0.0913	0.0034	0.1022	0.0031	0.0866	0.0034	0.1012	0.0037	0.109	0.0035	0.0976
Chr2	4260001	4270000	0.0032	0.0974	0.0035	0.1056	0.003	0.0854	0.0029	0.083	0.0025	0.0724	0.0026	0.0693
Chr2	4270001	4277765	0.0032	0.0974	0.0035	0.1056	0.003	0.0854	0.0029	0.083	0.0025	0.0724	0.0026	0.0693
Chr3	1	10000	0.0026	0.0848	0.003	0.1008	0.0031	0.1028	0.003	0.0926	0.0029	0.089	0.0034	0.107
Chr3	10001	20000	0.0025	0.0763	0.0033	0.1013	0.0037	0.1017	0.0032	0.0893	0.0029	0.0822	0.0033	0.0787
Chr3	20001	30000	0.0036	0.1033	0.0035	0.0978	0.0039	0.0997	0.0027	0.071	0.0024	0.0645	0.0025	0.0615
Chr3	30001	40000	0.0031	0.0927	0.0033	0.104	0.0033	0.091	0.0031	0.091	0.0029	0.0828	0.0032	0.0862
Chr3	40001	50000	0.0033	0.099	0.0033	0.1033	0.0032	0.0931	0.0031	0.089	0.0029	0.0825	0.0028	0.0757
Chr3	50001	60000	0.0028	0.088	0.0035	0.1123	0.003	0.09	0.0032	0.0981	0.0025	0.077	0.003	0.0843
Chr3	60001	70000	0.0035	0.1034	0.0027	0.0839	0.0034	0.0909	0.0028	0.0843	0.0031	0.0857	0.0032	0.0812
Chr3	70001	80000	0.0027	0.0786	0.0036	0.1053	0.0037	0.0999	0.0026	0.0703	0.0034	0.0965	0.0034	0.0871
Chr3	80001	90000	0.0029	0.0882	0.0037	0.111	0.0032	0.0855	0.0032	0.0883	0.0026	0.0731	0.0031	0.0783
Chr3	90001	100000	0.0032	0.0999	0.0031	0.0956	0.0035	0.1035	0.0028	0.0824	0.0025	0.0757	0.0031	0.0855
Chr3	100001	110000	0.003	0.0962	0.0029	0.0986	0.0034	0.1064	0.0031	0.092	0.0027	0.0788	0.003	0.0819
Chr3	110001	120000	0.0029	0.0876	0.0025	0.0783	0.0035	0.1002	0.0033	0.0975	0.0031	0.0862	0.0029	0.0771
Chr3	120001	130000	0.004	0.1037	0.0032	0.0854	0.0037	0.0861	0.0037	0.0955	0.0033	0.087	0.0036	0.0824
Chr3	130001	140000	0.0254	0.2048	0.0166	0.1591	0.0036	0.029	0.0038	0.0401	0.0044	0.0455	0.0032	0.0304
Chr3	140001	150000	0.026	0.2049	0.0093	0.1324	0.0033	0.0273	0.0035	0.0364	0.0036	0.0563	0.0023	0.0229
Chr3	150001	160000	0.0032	0.1044	0.0032	0.1157	0.003	0.0954	0.0024	0.0776	0.0034	0.1069	0.0026	0.0722
Chr3	160001	170000	0.0104	0.1802	0.0066	0.1648	0.0034	0.0491	0.0043	0.0788	0.0029	0.0787	0.0032	0.0438
Chr3	170001	180000	0.0037	0.115	0.0035	0.1077	0.0042	0.1138	0.0029	0.0856	0.0027	0.0761	0.0028	0.0732
Chr3	180001	190000	0.0028	0.0916	0.0034	0.1045	0.0035	0.1023	0.0032	0.095	0.0033	0.0966	0.0034	0.0931
Chr3	190001	200000	0.0032	0.0963	0.0034	0.1083	0.0033	0.0984	0.0027	0.0821	0.0031	0.094	0.0032	0.0903
Chr3	200001	210000	0.0031	0.0914	0.0032	0.0917	0.0035	0.0924	0.0028	0.0811	0.0032	0.0921	0.0031	0.0811
Chr3	210001	220000	0.0031	0.0946	0.0029	0.0922	0.0031	0.0772	0.0036	0.1019	0.0029	0.0937	0.0031	0.0713
Chr3	220001	230000	0.0066	0.1485	0.0041	0.112	0.0041	0.0807	0.0024	0.0571	0.0027	0.071	0.0028	0.0495
Chr3	230001	240000	0.0051	0.132	0.0035	0.1169	0.0037	0.0736	0.0024	0.0622	0.0031	0.0893	0.0038	0.071
Chr3	240001	250000	0.0244	0.1696	0.0221	0.1667	0.0045	0.034	0.004	0.0422	0	0	0.0033	0.0319
Chr3	250001	260000	0.0169	0.1282	0.0099	0.0833	0.004	0.0295	0.0039	0.037	0.0196	0.1667	0.0031	0.0286
Chr3	260001	270000	0.0039	0.0991	0.0031	0.0961	0.003	0.057	0.003	0.0735	0.0028	0.0796	0.0031	0.059
Chr3	270001	280000	0.0027	0.0821	0.0035	0.1013	0.0031	0.0858	0.0033	0.0901	0.0031	0.0853	0.0034	0.0866
Chr3	280001	290000	0.0031	0.0929	0.0027	0.0859	0.0031	0.0931	0.0039	0.1084	0.0032	0.0924	0.0036	0.0957
Chr3	290001	300000	0.0032	0.1077	0.0031	0.0972	0.0033	0.101	0.0028	0.0814	0.0026	0.0776	0.0034	0.093
Chr3	300001	310000	0.0033	0.0914	0.0036	0.0977	0.0035	0.0789	0.0034	0.0898	0.0032	0.081	0.0034	0.0736
Chr3	310001	320000	0.0028	0.0803	0.0033	0.0905	0.0037	0.0939	0.0024	0.0637	0.0035	0.0934	0.0024	0.0582
Chr3	320001	330000	0.0029	0.0887	0.0026	0.0776	0.0031	0.0823	0.0027	0.0801	0.0029	0.0865	0.0033	0.0852
Chr3	330001	340000	0.0031	0.098	0.0033	0.103	0.0031	0.0958	0.0027	0.081	0.0035	0.103	0.0031	0.0889
Chr3	340001	350000	0.0031	0.0956	0.0029	0.0875	0.0032	0.0921	0.0034	0.1029	0.003	0.0846	0.0029	0.0768
Chr3	350001	360000	0.003	0.0992	0.0032	0.1021	0.0032	0.0931	0.0027	0.0832	0.0032	0.0922	0.0032	0.0825
Chr3	360001	370000	0.0033	0.1058	0.0031	0.1003	0.0034	0.1015	0.0031	0.0957	0.0026	0.0823	0.0032	0.0953
Chr3	370001	380000	0.0033	0.1031	0.0032	0.0985	0.0033	0.0993	0.0032	0.1004	0.0034	0.0985	0.0029	0.0822
Chr3	380001	390000	0.0032	0.0911	0.0034	0.0934	0.0037	0.0879	0.0035	0.0993	0.0031	0.0833	0.0032	0.0765
Chr3	390001	400000	0.0037	0.1109	0.004	0.1128	0.0032	0.0812	0.0025	0.0675	0.0026	0.0684	0.0032	0.0733
Chr3	400001	410000	0.003	0.084	0.003	0.089	0.0028	0.0786	0.0038	0.105	0.0034	0.0932	0.0039	0.1015
Chr3	410001	420000	0.003	0.0803	0.0032	0.0851	0.0034	0.0825	0.0028	0.0741	0.0032	0.085	0.0032	0.0741
Chr3	420001	430000	0.0031	0.0826	0.0033	0.0863	0.0037	0.0885	0.0024	0.0659	0.0029	0.0754	0.0032	0.0739
Chr3	430001	440000	0.0033	0.0871	0.0031	0.0838	0.0036	0.0818	0.0027	0.0698	0.0032	0.076	0.0032	0.072
Chr3	440001	450000	0.0033	0.0923	0.0033	0.0931	0.0035	0.0852	0.0033	0.0844	0.0029	0.0735	0.003	0.0657
Chr3	450001	460000	0.0028	0.0689	0.0031	0.0759	0.0028	0.0632	0.0031	0.0806	0.0034	0.086	0.0034	0.0763
Chr3	460001	470000	0.0032	0.0889	0.0038	0.1003	0.0037	0.0876	0.0026	0.0711	0.003	0.0755	0.0031	0.0708
Chr3	470001	480000	0.0034	0.1032	0.0033	0.0995	0.004	0.107	0.003	0.0879	0.003	0.0876	0.0041	0.1039
Chr3	480001	490000	0.0031	0.0931	0.0032	0.0966	0.0032	0.0902	0.0023	0.0665	0.003	0.0875	0.0029	0.0758
Chr3	490001	500000	0.0023	0.0667	0.0028	0.0809	0.0031	0.0776	0.0032	0.0877	0.0033	0.0849	0.0031	0.0716
Chr3	500001	510000	0.0032	0.0923	0.0031	0.0839	0.0029	0.0733	0.0028	0.0755	0.0029	0.077	0.0026	0.0618
Chr3	510001	520000	0.003	0.0925	0.0033	0.1014	0.0034	0.0977	0.0031	0.0881	0.0026	0.0753	0.0031	0.0827
Chr3	520001	530000	0.0032	0.1013	0.0035	0.1063	0.0035	0.0982	0.0029	0.0846	0.0027	0.0762	0.0034	0.0876
Chr3	530001	540000	0.003	0.0926	0.003	0.0881	0.003	0.0789	0.0032	0.0927	0.0038	0.1076	0.0036	0.0911
Chr3	540001	550000	0.0027	0.0827	0.0028	0.0895	0.0032	0.0885	0.0036	0.1072	0.0032	0.0967	0.0034	0.0924
Chr3	550001	560000	0.0032	0.0991	0.0024	0.0705	0.003	0.0834	0.0027	0.0768	0.0027	0.0764	0.0034	0.0899
Chr3	560001	570000	0.0035	0.1036	0.0033	0.0962	0.0033	0.0922	0.0028	0.0764	0.0036	0.0978	0.0032	0.0807
Chr3	570001	580000	0.0034	0.1	0.0043	0.1211	0.0036	0.0946	0.0034	0.0956	0.0033	0.0844	0.0032	0.0784
Chr3	580001	590000	0.0035	0.0979	0.0038	0.1068	0.0038	0.0981	0.0026	0.0721	0.0026	0.0717	0.0029	0.07
Chr3	590001	600000	0.0033	0.1025	0.0028	0.0858	0.0038	0.1117	0.0028	0.0822	0.002	0.0584	0.0027	0.0754
Chr3	600001	610000	0.0028	0.0753	0.0032	0.0889	0.0031	0.0767	0.0023	0.0587	0.0038	0.0958	0.0033	0.0762
Chr3	610001	620000	0.0028	0.0881	0.0029	0.0909	0.0035	0.1017	0.0025	0.0784	0.0028	0.0843	0.0029	0.0834
Chr3	620001	630000	0.0033	0.0995	0.0034	0.0992	0.0034	0.092	0.0034	0.094	0.0026	0.0733	0.0031	0.0784
Chr3	630001	640000	0.003	0.0907	0.0027	0.0799	0.0026	0.0699	0.0036	0.1036	0.0036	0.1012	0.0033	0.0878
Chr3	640001	650000	0.0031	0.088	0.0025	0.073	0.0029	0.0753	0.0034	0.0919	0.0031	0.0801	0.0035	0.0811
Chr3	650001	660000	0.003	0.0899	0.0029	0.0852	0.0027	0.0714	0.0032	0.0886	0.0025	0.0686	0.0031	0.0765
Chr3	660001	670000	0.003	0.0875	0.0035	0.0969	0.0034	0.0799	0.0038	0.0999	0.0037	0.0945	0.004	0.087
Chr3	670001	680000	0.0028	0.0807	0.0035	0.0944	0.0033	0.0844	0.003	0.0843	0.0034	0.0915	0.0034	0.0906
Chr3	680001	690000	0.0038	0.109	0.0031	0.0898	0.0033	0.0819	0.0028	0.078	0.0033	0.0913	0.0026	0.0654
Chr3	690001	700000	0.0037	0.096	0.0032	0.0841	0.0043	0.1003	0.0031	0.0806	0.0031	0.0801	0.0028	0.0636
Chr3	700001	710000	0.0029	0.0863	0.003	0.0829	0.0029	0.0777	0.003	0.0796	0.003	0.0797	0.0031	0.0764
Chr3	710001	720000	0.0025	0.071	0.0026	0.0777	0.003	0.0807	0.0038	0.1007	0.0032	0.0907	0.0034	0.0852
Chr3	720001	730000	0.0035	0.1041	0.0033	0.0991	0.0034	0.0912	0.0028	0.0785	0.003	0.0861	0.0035	0.0937
Chr3	730001	740000	0.0028	0.0728	0.0027	0.0735	0.0029	0.0718	0.0026	0.0672	0.0029	0.0727	0.0026	0.0636
Chr3	740001	750000	0.003	0.0988	0.0032	0.1019	0.0035	0.1003	0.0027	0.0864	0.0028	0.0785	0.0032	0.0866
Chr3	750001	760000	0.0029	0.0839	0.0034	0.0973	0.0035	0.0911	0.0029	0.0824	0.0032	0.0911	0.0036	0.089
Chr3	760001	770000	0.0029	0.0808	0.0031	0.0851	0.0028	0.0687	0.0029	0.071	0.0027	0.0698	0.0029	0.0697
Chr3	770001	780000	0.0037	0.0915	0.0036	0.0957	0.004	0.0943	0.0032	0.0826	0.0026	0.0658	0.0035	0.0773
Chr3	780001	790000	0.0028	0.0796	0.0033	0.0925	0.0032	0.0837	0.0032	0.0839	0.0028	0.075	0.0027	0.0676
Chr3	790001	800000	0.0039	0.124	0.004	0.1257	0.0038	0.1062	0.0034	0.0982	0.0033	0.0931	0.0033	0.0845
Chr3	800001	810000	0.0035	0.0976	0.0037	0.1018	0.0042	0.1084	0.0033	0.0904	0.0027	0.0764	0.0036	0.0919
Chr3	810001	820000	0.0035	0.1011	0.0035	0.1013	0.0034	0.0883	0.0031	0.0861	0.0029	0.0828	0.0032	0.0794
Chr3	820001	830000	0.0033	0.0863	0.0028	0.0742	0.0033	0.0787	0.0032	0.0855	0.0031	0.0796	0.0033	0.077
Chr3	830001	840000	0.0027	0.0775	0.0032	0.0899	0.0027	0.0668	0.0028	0.0741	0.0034	0.0929	0.003	0.071
Chr3	840001	850000	0.0036	0.105	0.0036	0.104	0.0038	0.1037	0.0031	0.0868	0.0029	0.0791	0.0026	0.069
Chr3	850001	860000	0.0028	0.0721	0.0035	0.0932	0.0038	0.0864	0.003	0.0767	0.0028	0.0693	0.0026	0.0583
Chr3	860001	870000	0.0029	0.082	0.0031	0.0916	0.0032	0.0841	0.0025	0.067	0.0031	0.082	0.0032	0.0779
Chr3	870001	880000	0.0041	0.1041	0.0037	0.0937	0.0037	0.0834	0.003	0.076	0.0023	0.0615	0.003	0.0668
Chr3	880001	890000	0.0033	0.0871	0.0034	0.0879	0.0034	0.0748	0.0033	0.0834	0.0032	0.0832	0.0035	0.0782
Chr3	890001	900000	0.0031	0.0914	0.003	0.0929	0.0032	0.0882	0.0029	0.0845	0.0038	0.1083	0.0032	0.0845
Chr3	900001	910000	0.0028	0.0813	0.0031	0.0875	0.0029	0.0733	0.0028	0.0786	0.0027	0.0738	0.0032	0.0773
Chr3	910001	920000	0.0036	0.103	0.0032	0.0904	0.0038	0.0967	0.0033	0.0949	0.0035	0.0974	0.0035	0.0881
Chr3	920001	930000	0.004	0.1167	0.0034	0.108	0.0038	0.1095	0.0026	0.0772	0.0028	0.0825	0.003	0.0821
Chr3	930001	940000	0.003	0.0872	0.0034	0.0956	0.0039	0.1058	0.003	0.0853	0.0031	0.0853	0.003	0.0787
Chr3	940001	950000	0.0029	0.0809	0.0033	0.0916	0.0031	0.0861	0.0024	0.0698	0.0029	0.0829	0.0032	0.0858
Chr3	950001	960000	0.0022	0.0718	0.0033	0.1009	0.0038	0.1153	0.0031	0.0916	0.003	0.0922	0.0031	0.0911
Chr3	960001	970000	0.0038	0.1264	0.0035	0.1107	0.0037	0.1147	0.0031	0.0935	0.0028	0.0857	0.0029	0.0805
Chr3	970001	980000	0.0031	0.086	0.0033	0.095	0.0028	0.074	0.0032	0.0869	0.0032	0.087	0.0031	0.0778
Chr3	980001	990000	0.0029	0.0859	0.0031	0.0943	0.0032	0.0868	0.0035	0.098	0.0031	0.0899	0.0034	0.0893
Chr3	990001	1000000	0.0034	0.0995	0.0033	0.0963	0.0035	0.0911	0.0032	0.0874	0.0028	0.0776	0.0034	0.0804
Chr3	1000001	1010000	0.003	0.1009	0.0033	0.1065	0.0035	0.1053	0.0028	0.0874	0.0028	0.0861	0.003	0.0857
Chr3	1010001	1020000	0.0031	0.0899	0.0031	0.0908	0.0031	0.0848	0.0029	0.0824	0.0032	0.0881	0.003	0.0787
Chr3	1020001	1030000	0.0029	0.0839	0.0026	0.0787	0.0033	0.0849	0.0027	0.0766	0.003	0.0843	0.0032	0.0809
Chr3	1030001	1040000	0.0032	0.0928	0.0033	0.0969	0.003	0.0803	0.0027	0.0769	0.0032	0.0916	0.003	0.0808
Chr3	1040001	1050000	0.0025	0.0751	0.0028	0.0821	0.0028	0.0751	0.0029	0.0799	0.0031	0.0851	0.0029	0.0764
Chr3	1050001	1060000	0.0037	0.089	0.0027	0.0719	0.0029	0.0692	0.003	0.071	0.0027	0.0715	0.0031	0.0704
Chr3	1060001	1070000	0.0033	0.0993	0.0032	0.0939	0.0036	0.1015	0.0027	0.0804	0.003	0.0824	0.0032	0.0842
Chr3	1070001	1080000	0.0026	0.0801	0.0033	0.0999	0.003	0.0837	0.003	0.0835	0.0035	0.0926	0.0031	0.0822
Chr3	1080001	1090000	0.0034	0.1079	0.0032	0.0987	0.0037	0.1076	0.003	0.094	0.0031	0.0918	0.0035	0.0986
Chr3	1090001	1100000	0.0028	0.0779	0.0033	0.095	0.0033	0.0837	0.0028	0.0734	0.003	0.0796	0.0034	0.0784
Chr3	1100001	1110000	0.0027	0.0865	0.0026	0.0857	0.0029	0.0861	0.0039	0.1147	0.0035	0.1034	0.0041	0.1119
Chr3	1110001	1120000	0.0027	0.0794	0.0034	0.1014	0.0038	0.1031	0.0029	0.0898	0.003	0.0879	0.0033	0.0878
Chr3	1120001	1130000	0.0032	0.0929	0.0031	0.0869	0.003	0.0825	0.0033	0.087	0.0033	0.0825	0.0033	0.0826
Chr3	1130001	1140000	0.0035	0.1114	0.0037	0.1116	0.0038	0.1081	0.0029	0.0833	0.0027	0.08	0.0033	0.0884
Chr3	1140001	1150000	0.0032	0.0926	0.0029	0.0848	0.0034	0.0897	0.0029	0.084	0.0026	0.0714	0.0027	0.0687
Chr3	1150001	1160000	0.0034	0.0995	0.0034	0.0947	0.0036	0.0894	0.0024	0.0619	0.0034	0.083	0.0032	0.0743
Chr3	1160001	1170000	0.003	0.0928	0.0027	0.0843	0.0031	0.0842	0.003	0.0883	0.003	0.0887	0.0033	0.0851
Chr3	1170001	1180000	0.0034	0.1056	0.0029	0.09	0.0036	0.0978	0.0028	0.0816	0.0032	0.0873	0.0033	0.0865
Chr3	1180001	1190000	0.0034	0.1099	0.0036	0.1113	0.0033	0.0954	0.0027	0.0837	0.003	0.0871	0.0034	0.0919
Chr3	1190001	1200000	0.0025	0.0796	0.0031	0.0934	0.0031	0.0913	0.0027	0.0803	0.0029	0.0868	0.0029	0.083
Chr3	1200001	1210000	0.0027	0.0861	0.003	0.0974	0.0034	0.1016	0.003	0.0919	0.0036	0.1084	0.0034	0.0909
Chr3	1210001	1220000	0.0027	0.0849	0.0026	0.0806	0.0037	0.1024	0.0029	0.0825	0.0024	0.0698	0.0029	0.0771
Chr3	1220001	1230000	0.0031	0.0907	0.0026	0.0771	0.0033	0.0866	0.0028	0.08	0.003	0.0835	0.0034	0.082
Chr3	1230001	1240000	0.0029	0.0901	0.0037	0.1112	0.0036	0.0959	0.0028	0.0801	0.003	0.0879	0.0033	0.0851
Chr3	1240001	1250000	0.0029	0.087	0.003	0.0954	0.003	0.085	0.0028	0.078	0.0022	0.0642	0.0027	0.0725
Chr3	1250001	1260000	0.0029	0.0916	0.0034	0.1082	0.0034	0.0972	0.003	0.091	0.0027	0.0831	0.0031	0.0837
Chr3	1260001	1270000	0.0027	0.0803	0.0034	0.0983	0.003	0.0805	0.003	0.0835	0.0034	0.0924	0.0032	0.0793
Chr3	1270001	1280000	0.0033	0.1102	0.0035	0.1186	0.0036	0.1183	0.0023	0.0772	0.0031	0.0991	0.0028	0.0842
Chr3	1280001	1290000	0.0032	0.0977	0.003	0.0939	0.0031	0.0869	0.0025	0.0718	0.0032	0.0925	0.0027	0.0706
Chr3	1290001	1300000	0.003	0.0902	0.0034	0.1026	0.0033	0.0903	0.0027	0.0785	0.003	0.087	0.0031	0.0785
Chr3	1300001	1310000	0.0029	0.0903	0.0036	0.1061	0.003	0.0906	0.0036	0.1055	0.0029	0.0882	0.0028	0.0773
Chr3	1310001	1320000	0.0026	0.0727	0.0025	0.071	0.0029	0.075	0.0033	0.0856	0.0031	0.079	0.0026	0.0619
Chr3	1320001	1330000	0.0033	0.0962	0.0023	0.068	0.0031	0.0819	0.0041	0.1116	0.0031	0.085	0.0034	0.085
Chr3	1330001	1340000	0.003	0.087	0.0029	0.079	0.003	0.0755	0.0029	0.0789	0.0023	0.0588	0.0029	0.0682
Chr3	1340001	1350000	0.0027	0.088	0.0028	0.0875	0.0029	0.0848	0.0035	0.1	0.0038	0.1099	0.0033	0.0917
Chr3	1350001	1360000	0.0036	0.1016	0.0032	0.0997	0.0034	0.0911	0.0032	0.0931	0.0031	0.0885	0.0033	0.0829
Chr3	1360001	1370000	0.0027	0.0789	0.0033	0.0986	0.0035	0.0956	0.0032	0.0888	0.0033	0.093	0.0035	0.0923
Chr3	1370001	1380000	0.0027	0.0921	0.0028	0.0898	0.0036	0.108	0.0033	0.1019	0.0032	0.0965	0.0034	0.1004
Chr3	1380001	1390000	0.0033	0.0966	0.003	0.086	0.0031	0.0855	0.0036	0.1022	0.0034	0.0916	0.0033	0.0846
Chr3	1390001	1400000	0.003	0.0766	0.0028	0.0713	0.0026	0.061	0.0028	0.0712	0.0028	0.0684	0.0032	0.0701
Chr3	1400001	1410000	0.0031	0.0904	0.0027	0.0784	0.0036	0.0962	0.0027	0.0751	0.0023	0.0651	0.0027	0.0697
Chr3	1410001	1420000	0.0031	0.0826	0.0031	0.0854	0.0034	0.0769	0.0034	0.0869	0.0028	0.0732	0.0029	0.0655
Chr3	1420001	1430000	0.0027	0.078	0.0032	0.0836	0.003	0.0684	0.0033	0.0866	0.0031	0.0788	0.0037	0.0784
Chr3	1430001	1440000	0.0028	0.0726	0.003	0.0758	0.0028	0.0615	0.0037	0.0901	0.0036	0.0862	0.0034	0.0737
Chr3	1440001	1450000	0.0032	0.097	0.0032	0.0984	0.0039	0.1061	0.0028	0.0805	0.0029	0.0833	0.0031	0.0807
Chr3	1450001	1460000	0.003	0.0914	0.0034	0.0986	0.0032	0.0906	0.0029	0.0901	0.0026	0.0779	0.0033	0.0937
Chr3	1460001	1470000	0.003	0.0826	0.0036	0.099	0.0034	0.0888	0.0031	0.0801	0.0034	0.0909	0.0029	0.0728
Chr3	1470001	1480000	0.0029	0.0843	0.0028	0.0806	0.0033	0.0865	0.0029	0.0756	0.0032	0.0879	0.003	0.0722
Chr3	1480001	1490000	0.0039	0.115	0.0039	0.1141	0.004	0.1028	0.003	0.0775	0.0033	0.0855	0.0036	0.0865
Chr3	1490001	1500000	0.0028	0.086	0.0031	0.0918	0.0036	0.0987	0.0032	0.0881	0.003	0.081	0.003	0.0784
Chr3	1500001	1510000	0.0037	0.1084	0.0041	0.1237	0.004	0.1097	0.0035	0.0948	0.0035	0.0913	0.0038	0.0938
Chr3	1510001	1520000	0.0033	0.1054	0.0032	0.1021	0.0032	0.096	0.0025	0.0729	0.0024	0.0688	0.0034	0.0944
Chr3	1520001	1530000	0.0026	0.0784	0.0029	0.0827	0.0033	0.0864	0.0035	0.0942	0.0033	0.0951	0.0034	0.0862
Chr3	1530001	1540000	0.0033	0.0996	0.0035	0.103	0.0034	0.0938	0.0027	0.0794	0.0029	0.0833	0.0031	0.0826
Chr3	1540001	1550000	0.0031	0.0932	0.0034	0.0997	0.0032	0.0902	0.0028	0.0794	0.0033	0.0895	0.0033	0.0846
Chr3	1550001	1560000	0.0028	0.0852	0.0027	0.0736	0.0029	0.0782	0.0036	0.0964	0.0033	0.0894	0.0032	0.0799
Chr3	1560001	1570000	0.0029	0.0824	0.0029	0.0812	0.0031	0.082	0.0034	0.0928	0.0035	0.0955	0.0031	0.0777
Chr3	1570001	1580000	0.0031	0.0919	0.0031	0.0907	0.0031	0.084	0.003	0.084	0.0034	0.0931	0.0035	0.0829
Chr3	1580001	1590000	0.0033	0.0893	0.0036	0.1036	0.0042	0.1094	0.0027	0.0724	0.0031	0.0818	0.0032	0.0818
Chr3	1590001	1600000	0.0033	0.0963	0.004	0.1073	0.0036	0.0962	0.0029	0.0825	0.0031	0.0813	0.003	0.0761
Chr3	1600001	1610000	0.003	0.0898	0.0028	0.0812	0.0029	0.0758	0.0031	0.0834	0.003	0.0805	0.0029	0.0737
Chr3	1610001	1620000	0.0036	0.0995	0.0029	0.0857	0.0033	0.0878	0.0034	0.0956	0.0036	0.1005	0.0031	0.0822
Chr3	1620001	1630000	0.0027	0.0767	0.0037	0.1043	0.0037	0.0951	0.003	0.0808	0.0031	0.0857	0.0032	0.079
Chr3	1630001	1640000	0.0033	0.0961	0.0026	0.0732	0.0029	0.0726	0.0034	0.0969	0.0034	0.0948	0.0037	0.0872
Chr3	1640001	1650000	0.0038	0.123	0.0037	0.1141	0.0031	0.0922	0.0027	0.0782	0.0029	0.0872	0.0027	0.0736
Chr3	1650001	1660000	0.0027	0.0779	0.0025	0.0733	0.0033	0.0898	0.0033	0.0895	0.003	0.0804	0.0031	0.0785
Chr3	1660001	1670000	0.003	0.0953	0.0027	0.0847	0.0032	0.0969	0.0034	0.1018	0.0035	0.108	0.0035	0.1
Chr3	1670001	1680000	0.0035	0.0885	0.0038	0.0998	0.0037	0.0925	0.0036	0.0987	0.003	0.081	0.0032	0.0792
Chr3	1680001	1690000	0.0034	0.0925	0.0036	0.0972	0.0043	0.107	0.0035	0.0949	0.0028	0.0738	0.0037	0.0897
Chr3	1690001	1700000	0.0034	0.1063	0.0036	0.113	0.0034	0.0997	0.0029	0.0884	0.0024	0.0705	0.0025	0.0724
Chr3	1700001	1710000	0.0032	0.0883	0.0029	0.0827	0.0034	0.0918	0.0029	0.0815	0.003	0.0841	0.0037	0.0922
Chr3	1710001	1720000	0.0026	0.0786	0.0025	0.0756	0.0032	0.0899	0.003	0.0936	0.0027	0.079	0.003	0.084
Chr3	1720001	1730000	0.0117	0.1849	0.0058	0.1362	0.0034	0.0588	0.0028	0.0608	0.0019	0.0495	0.0028	0.0487
Chr3	1730001	1740000	0.0334	0.3186	0.009	0.168	0.0048	0.0527	0.0035	0.0433	0.0076	0.1016	0.0039	0.0423
Chr3	1740001	1750000	0.0082	0.154	0.0042	0.123	0.0032	0.0479	0.003	0.0627	0.0029	0.0798	0.0028	0.0465
Chr3	1750001	1760000	0.0086	0.1855	0.004	0.1123	0.0039	0.0795	0.0022	0.0569	0.0029	0.0793	0.0035	0.0683
Chr3	1760001	1770000	0.0038	0.0919	0.0032	0.0836	0.0041	0.0956	0.0029	0.0701	0.0029	0.0709	0.0033	0.0733
Chr3	1770001	1780000	0.0032	0.0928	0.003	0.0863	0.0035	0.0922	0.0037	0.1044	0.0035	0.1005	0.0035	0.0912
Chr3	1780001	1790000	0.0035	0.0846	0.0036	0.0832	0.0039	0.0837	0.0026	0.0599	0.0034	0.0808	0.0039	0.0751
Chr3	1790001	1800000	0.0029	0.0859	0.0031	0.088	0.0037	0.0905	0.0032	0.0858	0.0032	0.0841	0.0038	0.0864
Chr3	1800001	1810000	0.0039	0.0885	0.0033	0.074	0.0038	0.0727	0.0028	0.0634	0.0025	0.0587	0.0029	0.0565
Chr3	1810001	1820000	0.0029	0.0912	0.0028	0.0867	0.0028	0.0848	0.0033	0.1	0.0032	0.0953	0.0035	0.0956
Chr3	1820001	1830000	0.0026	0.0814	0.0028	0.0902	0.0028	0.087	0.0029	0.088	0.0028	0.0829	0.0031	0.0864
Chr3	1830001	1840000	0.0026	0.0801	0.0028	0.0831	0.0031	0.0809	0.0029	0.0834	0.0032	0.0856	0.0031	0.0763
Chr3	1840001	1850000	0.0031	0.0845	0.0031	0.0845	0.0033	0.0844	0.0029	0.0757	0.0031	0.0803	0.0031	0.0731
Chr3	1850001	1860000	0.0029	0.0837	0.0029	0.0863	0.0029	0.075	0.0035	0.0945	0.0034	0.0912	0.003	0.0738
Chr3	1860001	1870000	0.0028	0.081	0.0026	0.0781	0.0028	0.0784	0.0029	0.0862	0.0029	0.087	0.0032	0.0873
Chr3	1870001	1880000	0.0032	0.0958	0.0033	0.0949	0.0034	0.0953	0.0031	0.0899	0.0028	0.0839	0.0027	0.0729
Chr3	1880001	1890000	0.003	0.0884	0.0031	0.0867	0.0031	0.0782	0.0028	0.0775	0.0022	0.0596	0.0032	0.0733
Chr3	1890001	1900000	0.0029	0.0862	0.0029	0.087	0.003	0.0813	0.0032	0.088	0.0031	0.087	0.0037	0.094
Chr3	1900001	1910000	0.0036	0.1087	0.0033	0.1023	0.0038	0.1078	0.0031	0.09	0.0034	0.0997	0.003	0.0793
Chr3	1910001	1920000	0.0026	0.075	0.0028	0.0826	0.0033	0.0892	0.0029	0.0826	0.0035	0.0956	0.0032	0.0825
Chr3	1920001	1930000	0.0037	0.1093	0.0035	0.104	0.0039	0.1112	0.0027	0.0749	0.0031	0.088	0.0033	0.0897
Chr3	1930001	1940000	0.0046	0.1136	0.0044	0.1291	0.0036	0.0998	0.0033	0.0986	0.0034	0.1036	0.0029	0.0769
Chr3	1940001	1950000	0.0029	0.0855	0.0024	0.072	0.0032	0.0861	0.0029	0.0844	0.0025	0.0705	0.003	0.0767
Chr3	1950001	1960000	0.0031	0.0827	0.003	0.0814	0.0039	0.0981	0.0036	0.0943	0.0031	0.0818	0.0032	0.0749
Chr3	1960001	1970000	0.0033	0.0928	0.0041	0.1156	0.0039	0.0989	0.0033	0.0868	0.0038	0.103	0.0038	0.0895
Chr3	1970001	1980000	0.0024	0.0651	0.0033	0.0885	0.003	0.0769	0.0028	0.0767	0.0032	0.0861	0.003	0.0727
Chr3	1980001	1990000	0.0029	0.08	0.0037	0.0993	0.0036	0.0867	0.0029	0.0761	0.0035	0.0895	0.0038	0.0816
Chr3	1990001	2000000	0.0031	0.0817	0.0024	0.0602	0.0028	0.0627	0.0022	0.0533	0.0035	0.0853	0.0033	0.0708
Chr3	2000001	2010000	0.0031	0.086	0.0032	0.0875	0.0033	0.0876	0.0026	0.0709	0.003	0.0801	0.0026	0.0652
Chr3	2010001	2020000	0.0032	0.0845	0.0037	0.0977	0.0031	0.0728	0.0029	0.0756	0.0035	0.0932	0.0038	0.088
Chr3	2020001	2030000	0.0026	0.08	0.0032	0.0902	0.0031	0.0826	0.0029	0.0849	0.0029	0.0796	0.0028	0.0691
Chr3	2030001	2040000	0.0036	0.1029	0.0036	0.0992	0.0032	0.0747	0.0029	0.0764	0.0031	0.0796	0.0028	0.0656
Chr3	2040001	2050000	0.0035	0.1021	0.0034	0.0955	0.0042	0.1027	0.0029	0.0819	0.0032	0.0855	0.0031	0.0741
Chr3	2050001	2060000	0.0029	0.0737	0.0036	0.0903	0.0032	0.0757	0.0028	0.0715	0.0031	0.0824	0.0029	0.0677
Chr3	2060001	2070000	0.0036	0.1123	0.0035	0.1065	0.0038	0.102	0.0032	0.0909	0.0029	0.0815	0.0032	0.0833
Chr3	2070001	2080000	0.0029	0.0907	0.0037	0.1176	0.0029	0.0852	0.0025	0.0753	0.0025	0.0785	0.0031	0.0878
Chr3	2080001	2090000	0.003	0.0859	0.0035	0.0979	0.0035	0.0928	0.0028	0.0752	0.003	0.0819	0.0028	0.0696
Chr3	2090001	2100000	0.003	0.0898	0.0031	0.0853	0.0037	0.0953	0.0035	0.0947	0.0035	0.0931	0.0034	0.082
Chr3	2100001	2110000	0.0041	0.1102	0.0037	0.0983	0.004	0.0892	0.0031	0.077	0.003	0.0798	0.0027	0.062
Chr3	2110001	2120000	0.0032	0.0905	0.0034	0.0973	0.0036	0.0949	0.0027	0.0746	0.0036	0.0962	0.003	0.0779
Chr3	2120001	2130000	0.003	0.0738	0.0026	0.0682	0.0034	0.0816	0.0031	0.0761	0.0033	0.0828	0.0032	0.0731
Chr3	2130001	2140000	0.0032	0.0936	0.0038	0.1079	0.0035	0.0869	0.0034	0.0901	0.0035	0.0914	0.0034	0.0807
Chr3	2140001	2150000	0.0031	0.0822	0.0033	0.0867	0.0031	0.0768	0.0032	0.0844	0.0036	0.0926	0.0032	0.0779
Chr3	2150001	2160000	0.0029	0.0901	0.0026	0.0799	0.0031	0.0825	0.0025	0.072	0.0027	0.0751	0.0031	0.0769
Chr3	2160001	2170000	0.0029	0.0866	0.003	0.0885	0.0029	0.0852	0.0032	0.0911	0.0027	0.0729	0.0033	0.0893
Chr3	2170001	2180000	0.0033	0.0969	0.0036	0.1062	0.0035	0.0886	0.0038	0.1052	0.0034	0.0957	0.0039	0.095
Chr3	2180001	2190000	0.0031	0.1012	0.0034	0.1114	0.0031	0.0986	0.0022	0.067	0.0028	0.0874	0.0033	0.0948
Chr3	2190001	2200000	0.0037	0.118	0.0035	0.1088	0.0035	0.1019	0.0034	0.1025	0.0027	0.0822	0.0028	0.0762
Chr3	2200001	2210000	0.0032	0.0896	0.0034	0.0927	0.0038	0.0936	0.0028	0.0756	0.0031	0.0825	0.0029	0.0707
Chr3	2210001	2220000	0.0028	0.08	0.0031	0.0891	0.0032	0.0884	0.0037	0.1036	0.0029	0.0813	0.0036	0.095
Chr3	2220001	2230000	0.0028	0.0744	0.0027	0.0721	0.0027	0.0648	0.0029	0.0767	0.0029	0.0757	0.0031	0.074
Chr3	2230001	2240000	0.0031	0.0827	0.0029	0.0774	0.003	0.0729	0.0026	0.0674	0.0027	0.0691	0.0032	0.0739
Chr3	2240001	2250000	0.0029	0.0802	0.0028	0.0828	0.0031	0.0814	0.0031	0.0841	0.0034	0.0897	0.0033	0.079
Chr3	2250001	2260000	0.003	0.0869	0.0032	0.0923	0.0037	0.0912	0.0036	0.0983	0.003	0.0807	0.0036	0.0898
Chr3	2260001	2270000	0.0024	0.0733	0.0025	0.0768	0.003	0.0804	0.0021	0.0602	0.0025	0.0699	0.003	0.0755
Chr3	2270001	2280000	0.0029	0.078	0.0032	0.0882	0.0031	0.0788	0.003	0.0805	0.0032	0.0869	0.0035	0.0924
Chr3	2280001	2290000	0.0035	0.1008	0.0032	0.0903	0.0031	0.0804	0.0027	0.0718	0.0037	0.0978	0.0034	0.0816
Chr3	2290001	2300000	0.0036	0.1109	0.0035	0.1109	0.0037	0.1087	0.003	0.0942	0.0027	0.079	0.003	0.084
Chr3	2300001	2310000	0.0032	0.0935	0.0031	0.0927	0.0032	0.0852	0.0033	0.0941	0.0034	0.0958	0.004	0.1004
Chr3	2310001	2320000	0.0032	0.0988	0.0039	0.1132	0.0035	0.102	0.0031	0.0895	0.0033	0.0916	0.0039	0.1027
Chr3	2320001	2330000	0.0034	0.1094	0.0029	0.0897	0.0029	0.0772	0.0026	0.0775	0.003	0.0866	0.0031	0.0793
Chr3	2330001	2340000	0.0033	0.1035	0.0032	0.0995	0.003	0.0923	0.003	0.0869	0.0034	0.0986	0.003	0.0802
Chr3	2340001	2350000	0.0033	0.1073	0.0036	0.117	0.0031	0.0889	0.0028	0.0851	0.0033	0.1011	0.0033	0.0889
Chr3	2350001	2360000	0.0028	0.0856	0.0027	0.0808	0.0032	0.0891	0.0025	0.0738	0.0024	0.0687	0.0033	0.0837
Chr3	2360001	2370000	0.0033	0.107	0.003	0.093	0.0034	0.0987	0.0029	0.0833	0.003	0.0862	0.0032	0.0864
Chr3	2370001	2380000	0.0047	0.1125	0.0042	0.1257	0.0043	0.0757	0.004	0.088	0.0033	0.0888	0.0045	0.0782
Chr3	2380001	2390000	0.0061	0.0473	0.0127	0.1111	0.002	0.0178	0.0033	0.0308	0	0	0.0027	0.0265
Chr3	2390001	2400000	0.0102	0.0807	0.0128	0.1129	0.0035	0.0295	0.0038	0.0391	0.0013	0.0145	0.0023	0.0239
Chr3	2400001	2410000	0.0077	0.0693	0.0158	0.1429	0.0031	0.0273	9e-04	0.0095	0	0	0.0025	0.0233
Chr3	2410001	2420000	0.0094	0.0833	0	0	0.0027	0.0224	0.0016	0.0171	0.0052	0.0526	0.0034	0.0327
Chr3	2420001	2430000	0.0076	0.0606	0	0	0.0041	0.0338	0.0033	0.0353	0	0	0.0021	0.0208
Chr3	2430001	2440000	0.0079	0.0712	0.0098	0.0857	0.0039	0.0305	0.0017	0.0173	0	0	0.0027	0.0256
Chr3	2440001	2450000	0.0083	0.0787	0.0086	0.0909	0.0021	0.0195	0.0032	0.0338	0.0067	0.0727	0.0021	0.0212
Chr3	2450001	2460000	0.0075	0.0643	0.0054	0.0526	0.0073	0.065	0.0026	0.0258	0	0	0.0028	0.0255
Chr3	2460001	2470000	0.0079	0.0825	0.0054	0.0667	0.003	0.0304	0.0024	0.0277	0.0029	0.0326	0.0032	0.0317
Chr3	2470001	2480000	0.0066	0.0629	0.0144	0.0889	0.0023	0.0198	0.0027	0.0277	0.0018	0.0217	0.0028	0.0288
Chr3	2480001	2490000	0.0048	0.0469	0.0072	0.0714	0.0024	0.0219	0.0026	0.0276	0	0	0.0022	0.0222
Chr3	2490001	2500000	0.0086	0.0742	0.0038	0.0345	0.0044	0.0376	0.0047	0.0446	0.0037	0.0345	0.0023	0.0209
Chr3	2500001	2510000	0.0076	0.0719	0.0096	0.1081	0.0026	0.023	0.0024	0.0252	0.0047	0.0513	0.003	0.0288
Chr3	2510001	2520000	0.0079	0.0708	0.0039	0.0175	0.0027	0.0244	0.0042	0.0428	0.0017	0.0172	0.0028	0.027
Chr3	2520001	2530000	0.0099	0.0872	0.0034	0.0303	0.0032	0.0279	0.0028	0.0312	0.0109	0.1176	0.0034	0.0343
Chr3	2530001	2540000	0.0162	0.1492	0.0218	0.25	0.0066	0.0583	0.0035	0.0393	0.0039	0.0476	0.0028	0.0295
Chr3	2540001	2550000	0.003	0.0935	0.0028	0.0913	0.0036	0.0954	0.0033	0.094	0.0032	0.0908	0.0037	0.0886
Chr3	2550001	2560000	0.0029	0.0976	0.0027	0.0888	0.0034	0.0995	0.0032	0.0958	0.0031	0.0916	0.0035	0.094
Chr3	2560001	2570000	0.003	0.0929	0.0035	0.1021	0.0032	0.0875	0.0034	0.0932	0.0031	0.0853	0.0036	0.0862
Chr3	2570001	2580000	0.0025	0.0733	0.0038	0.1101	0.0042	0.1072	0.0028	0.0726	0.0034	0.0904	0.003	0.0729
Chr3	2580001	2590000	0.0038	0.1266	0.0029	0.0951	0.0038	0.1146	0.0026	0.0827	0.003	0.0865	0.003	0.0852
Chr3	2590001	2600000	0.0029	0.0817	0.003	0.0797	0.0031	0.0757	0.0028	0.0751	0.0031	0.0796	0.003	0.0702
Chr3	2600001	2610000	0.003	0.0828	0.003	0.0854	0.0029	0.0731	0.0031	0.0857	0.0022	0.0616	0.0027	0.0659
Chr3	2610001	2620000	0.0025	0.0784	0.0032	0.0967	0.0031	0.0848	0.0035	0.1018	0.003	0.084	0.0033	0.0826
Chr3	2620001	2630000	0.0031	0.0923	0.0033	0.098	0.003	0.0828	0.0026	0.0757	0.0029	0.0827	0.003	0.0776
Chr3	2630001	2640000	0.0032	0.1053	0.0031	0.0981	0.0034	0.1022	0.003	0.092	0.0035	0.1063	0.0034	0.0969
Chr3	2640001	2650000	0.0026	0.0808	0.0035	0.1071	0.0031	0.0857	0.003	0.0824	0.0033	0.0905	0.0029	0.0741
Chr3	2650001	2660000	0.0031	0.0771	0.0032	0.0845	0.0035	0.0816	0.003	0.0731	0.0032	0.073	0.003	0.0681
Chr3	2660001	2670000	0.0031	0.0993	0.0031	0.0931	0.0038	0.1088	0.0031	0.096	0.0032	0.0963	0.0036	0.0974
Chr3	2670001	2680000	0.003	0.0962	0.0029	0.0923	0.0031	0.0936	0.0036	0.1028	0.0037	0.1094	0.0033	0.0896
Chr3	2680001	2690000	0.0029	0.0865	0.0032	0.0981	0.0032	0.0872	0.003	0.089	0.0029	0.086	0.0034	0.0881
Chr3	2690001	2700000	0.0036	0.108	0.0033	0.1014	0.0031	0.086	0.0027	0.0806	0.0035	0.105	0.0032	0.0856
Chr3	2700001	2710000	0.003	0.0807	0.0028	0.0732	0.0029	0.0722	0.0031	0.0809	0.0028	0.0697	0.003	0.0723
Chr3	2710001	2720000	0.0034	0.1065	0.0035	0.1088	0.0034	0.093	0.003	0.0854	0.0029	0.0892	0.0031	0.0778
Chr3	2720001	2730000	0.0029	0.0835	0.0026	0.074	0.0031	0.076	0.0028	0.0768	0.0036	0.0933	0.0033	0.0808
Chr3	2730001	2740000	0.003	0.0843	0.0037	0.102	0.0034	0.0781	0.0032	0.0879	0.0029	0.0799	0.0038	0.0872
Chr3	2740001	2750000	0.0036	0.0981	0.0034	0.0908	0.0036	0.0844	0.0027	0.0728	0.003	0.0775	0.0027	0.0632
Chr3	2750001	2760000	0.004	0.111	0.0034	0.1013	0.0034	0.0916	0.0026	0.0699	0.0029	0.0782	0.0029	0.0776
Chr3	2760001	2770000	0.0491	0.3652	0.0189	0.1452	0.0063	0.0556	0.0037	0.0418	0.0027	0.0317	0.0026	0.0277
Chr3	2770001	2780000	0.0052	0.1356	0.004	0.1246	0.0036	0.0873	0.0026	0.0773	0.0024	0.08	0.0029	0.0711
Chr3	2780001	2790000	0.0037	0.0854	0.0029	0.0792	0.0031	0.0691	0.003	0.0777	0.0029	0.0757	0.0035	0.077
Chr3	2790001	2800000	0.0028	0.0798	0.0036	0.1061	0.0032	0.0851	0.0029	0.0808	0.003	0.0861	0.0033	0.0824
Chr3	2800001	2810000	0.0029	0.0823	0.0033	0.0978	0.0031	0.0851	0.0033	0.0893	0.0032	0.0888	0.0036	0.094
Chr3	2810001	2820000	0.0031	0.0899	0.0028	0.0832	0.0028	0.077	0.0029	0.0844	0.0025	0.0685	0.0031	0.0791
Chr3	2820001	2830000	0.003	0.0784	0.0033	0.0828	0.0033	0.0748	0.0028	0.0713	0.003	0.0711	0.0034	0.0752
Chr3	2830001	2840000	0.0029	0.0762	0.0033	0.0838	0.0032	0.0743	0.003	0.0764	0.0026	0.065	0.003	0.0667
Chr3	2840001	2850000	0.0033	0.0796	0.0028	0.0712	0.0031	0.0748	0.003	0.0761	0.0025	0.065	0.0035	0.0827
Chr3	2850001	2860000	0.0029	0.0847	0.0029	0.0825	0.0034	0.09	0.0026	0.072	0.0031	0.0808	0.003	0.074
Chr3	2860001	2870000	0.0029	0.0832	0.0029	0.0809	0.003	0.0809	0.0027	0.07	0.0036	0.0952	0.0036	0.0908
Chr3	2870001	2880000	0.0027	0.0723	0.0028	0.0756	0.0035	0.0848	0.0034	0.085	0.0032	0.0806	0.0037	0.0868
Chr3	2880001	2890000	0.0028	0.0765	0.0026	0.0727	0.0029	0.0682	0.0032	0.0792	0.0032	0.0816	0.0028	0.0591
Chr3	2890001	2900000	0.003	0.0861	0.0035	0.0962	0.004	0.095	0.0031	0.0822	0.0032	0.0845	0.0029	0.0651
Chr3	2900001	2910000	0.0033	0.1007	0.0041	0.1248	0.0036	0.1002	0.0027	0.0768	0.0032	0.0866	0.0034	0.0902
Chr3	2910001	2920000	0.0029	0.0843	0.004	0.1094	0.0034	0.0819	0.0029	0.0799	0.0032	0.0878	0.0036	0.0881
Chr3	2920001	2930000	0.0031	0.0935	0.0035	0.1058	0.0035	0.1032	0.0028	0.078	0.0032	0.089	0.0029	0.0781
Chr3	2930001	2940000	0.003	0.0892	0.0031	0.0914	0.0036	0.1025	0.0031	0.0841	0.0034	0.095	0.0032	0.0849
Chr3	2940001	2950000	0.0032	0.0994	0.0036	0.1057	0.0034	0.0905	0.0028	0.0836	0.0026	0.0736	0.003	0.0744
Chr3	2950001	2960000	0.0036	0.1025	0.0026	0.0774	0.0032	0.0846	0.003	0.0826	0.0028	0.0809	0.0034	0.0842
Chr3	2960001	2970000	0.0034	0.0969	0.0038	0.106	0.0038	0.0955	0.0025	0.0657	0.0028	0.0766	0.0026	0.0651
Chr3	2970001	2980000	0.0028	0.0791	0.0027	0.0742	0.0031	0.0818	0.0028	0.0764	0.0027	0.0726	0.0032	0.0804
Chr3	2980001	2990000	0.0034	0.0995	0.0037	0.1061	0.0037	0.0964	0.0032	0.0906	0.0025	0.0705	0.0034	0.085
Chr3	2990001	3000000	0.0031	0.091	0.0031	0.087	0.0039	0.0989	0.0027	0.074	0.0031	0.0824	0.0028	0.0665
Chr3	3000001	3010000	0.0033	0.0991	0.0031	0.0922	0.0032	0.0879	0.0025	0.0667	0.0027	0.0755	0.0031	0.0786
Chr3	3010001	3020000	0.003	0.0866	0.0026	0.0743	0.0029	0.0774	0.0031	0.0857	0.0032	0.0866	0.0036	0.0902
Chr3	3020001	3030000	0.0038	0.1075	0.0041	0.1158	0.0041	0.112	0.0032	0.0925	0.0032	0.0875	0.0035	0.0939
Chr3	3030001	3040000	0.0028	0.0848	0.0035	0.1054	0.0036	0.0987	0.0028	0.0754	0.0036	0.0938	0.0033	0.082
Chr3	3040001	3050000	0.0029	0.0817	0.0029	0.0797	0.0033	0.0821	0.003	0.0863	0.0029	0.0781	0.0034	0.082
Chr3	3050001	3060000	0.0027	0.0773	0.0032	0.0938	0.0035	0.0966	0.0032	0.0887	0.0035	0.0946	0.0028	0.0712
Chr3	3060001	3070000	0.0043	0.1076	0.0034	0.1057	0.004	0.1105	0.0032	0.0894	0.0031	0.0898	0.0037	0.0946
Chr3	3070001	3080000	0.0029	0.0834	0.0026	0.078	0.0028	0.0765	0.0031	0.0879	0.003	0.0879	0.0035	0.091
Chr3	3080001	3090000	0.0032	0.0829	0.0029	0.0709	0.0033	0.0701	0.0035	0.0848	0.0034	0.0799	0.0033	0.0687
Chr3	3090001	3100000	0.0035	0.0876	0.0031	0.0828	0.0031	0.0751	0.0025	0.0645	0.0025	0.0657	0.0031	0.0715
Chr3	3100001	3110000	0.0032	0.0955	0.0033	0.0975	0.0034	0.0884	0.0034	0.0933	0.0033	0.0915	0.0036	0.0863
Chr3	3110001	3120000	0.0029	0.085	0.0029	0.0878	0.0029	0.0783	0.0032	0.0905	0.0034	0.0915	0.0033	0.0846
Chr3	3120001	3130000	0.0027	0.0784	0.0028	0.0793	0.0035	0.0944	0.0031	0.0834	0.0028	0.0741	0.0034	0.0862
Chr3	3130001	3140000	0.0027	0.0772	0.0031	0.0939	0.0031	0.0803	0.0026	0.0728	0.0028	0.0804	0.0029	0.0731
Chr3	3140001	3150000	0.0024	0.0715	0.0029	0.0827	0.0036	0.0964	0.0031	0.0883	0.0024	0.0695	0.0025	0.0669
Chr3	3150001	3160000	0.003	0.0872	0.003	0.0879	0.003	0.0793	0.0032	0.0906	0.0028	0.0795	0.0029	0.0706
Chr3	3160001	3170000	0.0031	0.0904	0.0028	0.0832	0.0032	0.0844	0.0023	0.0661	0.003	0.0823	0.0029	0.0716
Chr3	3170001	3180000	0.0026	0.0801	0.0034	0.1018	0.0034	0.0912	0.0029	0.0847	0.0034	0.0953	0.0041	0.1043
Chr3	3180001	3190000	0.0034	0.1067	0.0037	0.1111	0.0033	0.0904	0.0026	0.0848	0.0034	0.1067	0.0032	0.0971
Chr3	3190001	3200000	0.0029	0.0778	0.003	0.0826	0.0028	0.069	0.0029	0.0755	0.0029	0.078	0.0031	0.0706
Chr3	3200001	3210000	0.0033	0.0937	0.0033	0.0896	0.003	0.0748	0.0034	0.0903	0.003	0.0805	0.0036	0.084
Chr3	3210001	3220000	0.0034	0.1058	0.0034	0.1055	0.0035	0.0971	0.0032	0.0924	0.0038	0.1072	0.0032	0.0812
Chr3	3220001	3230000	0.0032	0.1035	0.0029	0.0977	0.0035	0.109	0.0027	0.0793	0.0031	0.0924	0.0028	0.0808
Chr3	3230001	3240000	0.0029	0.0891	0.0033	0.0965	0.0033	0.0895	0.0029	0.0798	0.0032	0.0839	0.0029	0.0724
Chr3	3240001	3250000	0.0027	0.0778	0.0029	0.0824	0.0028	0.0743	0.0029	0.0798	0.003	0.0806	0.0028	0.0697
Chr3	3250001	3260000	0.0038	0.1085	0.0037	0.11	0.0033	0.0908	0.0029	0.0815	0.0025	0.0722	0.0036	0.0898
Chr3	3260001	3270000	0.0033	0.101	0.0027	0.0863	0.0032	0.0908	0.0028	0.0804	0.0028	0.0814	0.0033	0.084
Chr3	3270001	3280000	0.0032	0.0945	0.0035	0.099	0.0037	0.0984	0.0025	0.0697	0.003	0.0862	0.0027	0.0701
Chr3	3280001	3290000	0.003	0.0923	0.0038	0.1133	0.0035	0.0985	0.0034	0.0966	0.003	0.0856	0.003	0.0754
Chr3	3290001	3300000	0.0031	0.0946	0.0029	0.0914	0.0034	0.0974	0.0026	0.0764	0.0034	0.0968	0.0037	0.0944
Chr3	3300001	3310000	0.0024	0.0785	0.0034	0.1081	0.0033	0.0892	0.0032	0.0882	0.0045	0.1259	0.0034	0.0884
Chr3	3310001	3320000	0.004	0.1105	0.0039	0.1104	0.0037	0.0977	0.003	0.0834	0.0028	0.0771	0.003	0.0754
Chr3	3320001	3330000	0.0028	0.0921	0.004	0.1225	0.0029	0.0909	0.0027	0.0842	0.0034	0.0998	0.0032	0.0939
Chr3	3330001	3340000	0.0033	0.1042	0.0034	0.1091	0.0026	0.0759	0.0032	0.0959	0.0027	0.0789	0.0028	0.0782
Chr3	3340001	3350000	0.0025	0.0684	0.0029	0.0777	0.0033	0.0811	0.0023	0.0622	0.0022	0.0648	0.0029	0.0675
Chr3	3350001	3360000	0.0033	0.0937	0.0035	0.0943	0.0036	0.0908	0.0026	0.0648	0.0032	0.0837	0.0035	0.0834
Chr3	3360001	3370000	0.0029	0.089	0.0033	0.0999	0.0038	0.1013	0.003	0.0886	0.003	0.088	0.0034	0.0831
Chr3	3370001	3380000	0.0026	0.0748	0.0029	0.0826	0.0034	0.0851	0.0036	0.0966	0.0026	0.0728	0.0036	0.085
Chr3	3380001	3390000	0.0026	0.0807	0.0024	0.0721	0.003	0.0798	0.0035	0.0964	0.0034	0.0887	0.0035	0.0824
Chr3	3390001	3400000	0.0035	0.1067	0.0028	0.0898	0.0035	0.1004	0.0027	0.0795	0.0031	0.0924	0.0029	0.0786
Chr3	3400001	3410000	0.0029	0.09	0.0034	0.0987	0.0037	0.0962	0.0031	0.09	0.0029	0.0801	0.0027	0.0695
Chr3	3410001	3420000	0.0026	0.0826	0.003	0.0929	0.0036	0.1016	0.0029	0.0869	0.0029	0.0854	0.0036	0.0968
Chr3	3420001	3430000	0.0038	0.1146	0.0038	0.1179	0.0035	0.0965	0.0029	0.0776	0.0031	0.0849	0.0034	0.0889
Chr3	3430001	3440000	0.0034	0.0951	0.003	0.0842	0.0033	0.0842	0.0032	0.0838	0.0036	0.0968	0.0041	0.0983
Chr3	3440001	3450000	0.0028	0.0722	0.003	0.0748	0.003	0.0692	0.0025	0.059	0.0026	0.0593	0.0027	0.0555
Chr3	3450001	3460000	0.0032	0.0884	0.0037	0.1009	0.0035	0.0912	0.003	0.0788	0.003	0.0776	0.0033	0.0817
Chr3	3460001	3470000	0.0028	0.0816	0.0033	0.0932	0.0035	0.0907	0.0032	0.0938	0.0028	0.0797	0.003	0.0721
Chr3	3470001	3480000	0.003	0.092	0.0031	0.098	0.003	0.0896	0.0027	0.0766	0.0028	0.084	0.0027	0.0749
Chr3	3480001	3490000	0.0032	0.0956	0.0027	0.0792	0.0029	0.083	0.0028	0.0838	0.0031	0.0853	0.0032	0.0887
Chr3	3490001	3500000	0.0027	0.0841	0.0033	0.0971	0.0033	0.0945	0.0033	0.0933	0.0032	0.0906	0.0031	0.0823
Chr3	3500001	3510000	0.0031	0.0958	0.0029	0.0878	0.0031	0.0919	0.003	0.0935	0.0026	0.0762	0.0033	0.0904
Chr3	3510001	3520000	0.0026	0.0723	0.0031	0.0886	0.0029	0.0722	0.0025	0.0659	0.0037	0.0954	0.0034	0.0793
Chr3	3520001	3530000	0.0035	0.0924	0.0036	0.0916	0.0041	0.0907	0.0034	0.0884	0.0031	0.0813	0.0027	0.0569
Chr3	3530001	3540000	0.003	0.0887	0.0031	0.0872	0.0033	0.0895	0.0026	0.0749	0.003	0.0855	0.0033	0.087
Chr3	3540001	3550000	0.0032	0.1023	0.0033	0.1016	0.0037	0.1041	0.0028	0.0813	0.0029	0.0861	0.0028	0.0748
Chr3	3550001	3560000	0.0029	0.0846	0.0026	0.0784	0.0028	0.0757	0.0027	0.0777	0.003	0.0838	0.003	0.0787
Chr3	3560001	3570000	0.0033	0.1029	0.0039	0.1138	0.0031	0.0855	0.0027	0.0764	0.0028	0.0754	0.003	0.0753
Chr3	3570001	3580000	0.0031	0.0849	0.0035	0.09	0.0033	0.0815	0.003	0.0783	0.0029	0.0763	0.003	0.0704
Chr3	3580001	3590000	0.003	0.0821	0.0028	0.0809	0.0032	0.0818	0.0028	0.0799	0.0025	0.0696	0.0029	0.0709
Chr3	3590001	3600000	0.0033	0.0925	0.0031	0.0893	0.0036	0.0967	0.0029	0.081	0.0036	0.1005	0.0034	0.0885
Chr3	3600001	3610000	0.0032	0.1033	0.004	0.1328	0.0039	0.1167	0.0027	0.0814	0.003	0.0913	0.0028	0.0783
Chr3	3610001	3620000	0.0026	0.0707	0.0028	0.0742	0.0027	0.0663	0.0032	0.0801	0.0032	0.0821	0.0032	0.0754
Chr3	3620001	3630000	0.0035	0.1049	0.0031	0.0938	0.0034	0.0912	0.0028	0.0786	0.0033	0.0891	0.0028	0.0691
Chr3	3630001	3640000	0.0033	0.0991	0.003	0.0891	0.0038	0.1017	0.0032	0.0913	0.0029	0.0795	0.003	0.0753
Chr3	3640001	3650000	0.0031	0.1002	0.0037	0.1145	0.004	0.1148	0.0033	0.1017	0.0026	0.0772	0.0036	0.0949
Chr3	3650001	3660000	0.0034	0.1017	0.0031	0.0988	0.0033	0.091	0.0027	0.0766	0.0028	0.0799	0.0028	0.0731
Chr3	3660001	3670000	0.003	0.0958	0.0037	0.1166	0.0038	0.1161	0.0029	0.0892	0.0033	0.0969	0.004	0.1134
Chr3	3670001	3680000	0.0033	0.097	0.0032	0.0961	0.0035	0.0963	0.0025	0.0694	0.0033	0.0924	0.0031	0.0796
Chr3	3680001	3690000	0.0029	0.0829	0.003	0.0835	0.0033	0.0866	0.0033	0.0963	0.0027	0.0769	0.004	0.1037
Chr3	3690001	3700000	0.0031	0.0838	0.0026	0.0687	0.003	0.071	0.0026	0.0706	0.003	0.0784	0.0032	0.0774
Chr3	3700001	3710000	0.0032	0.0835	0.0031	0.0815	0.0033	0.08	0.0031	0.0827	0.0032	0.0839	0.0028	0.0694
Chr3	3710001	3720000	0.0027	0.0826	0.0025	0.0783	0.0032	0.0926	0.0026	0.078	0.0028	0.0814	0.0027	0.0753
Chr3	3720001	3730000	0.0031	0.0826	0.0029	0.077	0.0039	0.0932	0.0026	0.0695	0.0027	0.07	0.0032	0.0788
Chr3	3730001	3740000	0.0035	0.0995	0.0032	0.0889	0.0042	0.1135	0.0031	0.0871	0.0036	0.1007	0.0033	0.0829
Chr3	3740001	3750000	0.0052	0.1201	0.0043	0.1148	0.0031	0.0724	0.0025	0.0625	0.0032	0.0829	0.003	0.0663
Chr3	3750001	3760000	0.0035	0.0978	0.003	0.0898	0.0037	0.0947	0.0029	0.0779	0.0036	0.0887	0.0033	0.0777
Chr3	3760001	3770000	0.003	0.0914	0.0032	0.0993	0.0037	0.1063	0.0036	0.1047	0.003	0.0873	0.0038	0.106
Chr3	3770001	3780000	0.0028	0.0823	0.0034	0.1004	0.0032	0.0841	0.0029	0.0851	0.0033	0.0925	0.0033	0.0825
Chr3	3780001	3790000	0.0031	0.0913	0.0027	0.084	0.0031	0.0847	0.0029	0.0832	0.0031	0.0891	0.0028	0.0713
Chr3	3790001	3800000	0.0029	0.0799	0.0033	0.0941	0.0033	0.0853	0.0027	0.0718	0.003	0.0805	0.0033	0.0806
Chr3	3800001	3810000	0.0028	0.0822	0.0034	0.0976	0.0036	0.0936	0.0034	0.0903	0.0028	0.0772	0.0032	0.082
Chr3	3810001	3820000	0.0037	0.1157	0.0032	0.0993	0.004	0.1183	0.0027	0.0818	0.0037	0.1074	0.0032	0.0884
Chr3	3820001	3830000	0.0028	0.0907	0.0029	0.0912	0.0031	0.0922	0.0031	0.0867	0.003	0.0851	0.0035	0.0985
Chr3	3830001	3840000	0.0038	0.1139	0.0032	0.095	0.004	0.1052	0.0023	0.0649	0.003	0.0838	0.0029	0.0753
Chr3	3840001	3850000	0.0032	0.0844	0.0031	0.0842	0.0031	0.0774	0.0022	0.0592	0.0031	0.078	0.0028	0.0673
Chr3	3850001	3860000	0.0028	0.0784	0.0029	0.088	0.0028	0.0768	0.0028	0.0791	0.0027	0.0786	0.003	0.0782
Chr3	3860001	3870000	0.0027	0.0853	0.003	0.0904	0.0029	0.0853	0.0031	0.0908	0.0039	0.1057	0.0039	0.1042
Chr3	3870001	3880000	0.0032	0.0965	0.0027	0.0795	0.0032	0.0894	0.0027	0.0763	0.003	0.0859	0.0029	0.0733
Chr3	3880001	3890000	0.0031	0.0923	0.0028	0.0788	0.0028	0.0735	0.0029	0.0802	0.0026	0.0716	0.0024	0.0616
Chr3	3890001	3900000	0.0033	0.092	0.0033	0.0902	0.0036	0.0872	0.0026	0.0709	0.0024	0.0627	0.003	0.0701
Chr3	3900001	3910000	0.003	0.0898	0.0031	0.0903	0.0034	0.0949	0.0034	0.0921	0.0033	0.0886	0.003	0.0764
Chr3	3910001	3920000	0.0031	0.0957	0.0034	0.104	0.0035	0.1038	0.0029	0.0872	0.0027	0.0815	0.0033	0.0915
Chr3	3920001	3930000	0.0027	0.0871	0.0032	0.1025	0.0031	0.0887	0.0033	0.0944	0.003	0.0927	0.0032	0.0885
Chr3	3930001	3940000	0.0029	0.0861	0.0034	0.0999	0.0025	0.0705	0.003	0.089	0.0031	0.0914	0.0032	0.085
Chr3	3940001	3950000	0.0028	0.0849	0.0028	0.0862	0.0028	0.0794	0.0032	0.0945	0.003	0.0903	0.0033	0.0898
Chr3	3950001	3960000	0.0032	0.0978	0.0033	0.0998	0.0037	0.1067	0.0031	0.0914	0.003	0.0892	0.0034	0.0934
Chr3	3960001	3970000	0.0033	0.112	0.0034	0.1069	0.0036	0.1123	0.0032	0.1029	0.0034	0.1009	0.0037	0.1075
Chr3	3970001	3980000	0.0028	0.0893	0.0029	0.0937	0.0033	0.0983	0.0034	0.0987	0.0038	0.1033	0.0038	0.1029
Chr3	3980001	3990000	0.0029	0.0817	0.0026	0.0767	0.0035	0.0968	0.0031	0.0856	0.0029	0.0813	0.0029	0.0746
Chr3	3990001	4000000	0.0033	0.0908	0.0043	0.1203	0.0043	0.1063	0.0029	0.0779	0.0032	0.0828	0.0029	0.0693
Chr3	4000001	4010000	0.0036	0.1055	0.0037	0.1117	0.004	0.1142	0.0027	0.0808	0.0028	0.0808	0.0032	0.0843
Chr3	4010001	4020000	0.0029	0.0785	0.0035	0.0889	0.0033	0.0773	0.0032	0.0832	0.0036	0.0916	0.003	0.0654
Chr3	4020001	4030000	0.0025	0.0782	0.003	0.0972	0.0033	0.0971	0.0026	0.0754	0.0032	0.0911	0.0037	0.1001
Chr3	4030001	4040000	0.0027	0.0809	0.003	0.0847	0.0033	0.0812	0.0025	0.0676	0.0028	0.0766	0.0027	0.0632
Chr3	4040001	4050000	0.0027	0.0795	0.0028	0.0804	0.0032	0.0864	0.0028	0.079	0.0034	0.0954	0.0034	0.0879
Chr3	4050001	4060000	0.003	0.0959	0.0025	0.0771	0.0029	0.0827	0.003	0.0867	0.0028	0.0844	0.0029	0.0765
Chr3	4060001	4070000	0.0031	0.0978	0.0028	0.0879	0.0032	0.0919	0.003	0.0926	0.0029	0.0897	0.0035	0.0939
Chr3	4070001	4080000	0.0027	0.0789	0.003	0.0942	0.0033	0.0937	0.0035	0.0969	0.0036	0.0976	0.0035	0.0923
Chr3	4080001	4090000	0.0029	0.0908	0.0032	0.0978	0.0033	0.1018	0.0036	0.101	0.004	0.1138	0.0039	0.1074
Chr3	4090001	4100000	0.0032	0.1109	0.003	0.1005	0.0037	0.1192	0.0026	0.0787	0.003	0.0962	0.003	0.0896
Chr3	4100001	4110000	0.0036	0.1108	0.0038	0.1227	0.0038	0.106	0.0026	0.0743	0.0032	0.0871	0.0028	0.0712
Chr3	4110001	4120000	0.0029	0.0936	0.0023	0.0746	0.0028	0.0861	0.0022	0.066	0.0033	0.0961	0.003	0.083
Chr3	4120001	4130000	0.0034	0.1018	0.0035	0.0997	0.0033	0.088	0.0028	0.0744	0.0031	0.0863	0.003	0.0737
Chr3	4130001	4140000	0.0031	0.0939	0.0029	0.0911	0.0033	0.0929	0.0029	0.0832	0.0027	0.0783	0.003	0.079
Chr3	4140001	4150000	0.003	0.0992	0.0032	0.108	0.0031	0.0986	0.0031	0.0917	0.0034	0.0975	0.0036	0.1028
Chr3	4150001	4160000	0.0042	0.1202	0.0039	0.116	0.0038	0.0995	0.0028	0.0763	0.0035	0.0975	0.0032	0.0754
Chr3	4160001	4168633	0.0042	0.1202	0.0039	0.116	0.0038	0.0995	0.0028	0.0763	0.0035	0.0975	0.0032	0.0754
Chr4	1	10000	0.0046	0.117	0.0039	0.1093	0.0036	0.0889	0.0032	0.0891	0.0031	0.0839	0.0028	0.0641
Chr4	10001	20000	0.003	0.0943	0.0033	0.1018	0.0036	0.1055	0.0027	0.0823	0.0036	0.1086	0.0029	0.084
Chr4	20001	30000	0.0029	0.0924	0.0034	0.1054	0.0035	0.1025	0.0028	0.0811	0.0029	0.0846	0.0029	0.0787
Chr4	30001	40000	0.0033	0.1034	0.003	0.0934	0.0033	0.0954	0.0031	0.0901	0.0029	0.0831	0.0032	0.0845
Chr4	40001	50000	0.0035	0.1046	0.0037	0.1109	0.0038	0.1112	0.0025	0.0715	0.0027	0.0745	0.003	0.0793
Chr4	50001	60000	0.0029	0.0777	0.0033	0.0861	0.003	0.0712	0.0026	0.0692	0.0029	0.0719	0.003	0.0687
Chr4	60001	70000	0.0033	0.0981	0.0032	0.0996	0.003	0.0845	0.0032	0.0901	0.003	0.0871	0.0032	0.0808
Chr4	70001	80000	0.0024	0.0771	0.0027	0.0818	0.0033	0.1002	0.0031	0.095	0.003	0.0904	0.0035	0.099
Chr4	80001	90000	0.0028	0.0901	0.0031	0.0992	0.003	0.0901	0.0028	0.0854	0.0025	0.0759	0.0025	0.0705
Chr4	90001	100000	0.0027	0.0808	0.0034	0.0979	0.0028	0.0771	0.0025	0.0742	0.0029	0.0813	0.003	0.0769
Chr4	100001	110000	0.0035	0.1057	0.0035	0.1064	0.0033	0.0938	0.0031	0.087	0.003	0.0885	0.0031	0.0836
Chr4	110001	120000	0.0039	0.1063	0.0035	0.0983	0.0032	0.0811	0.003	0.0787	0.0031	0.0828	0.004	0.0966
Chr4	120001	130000	0.0031	0.0917	0.0037	0.1053	0.0035	0.0891	0.003	0.0833	0.0029	0.0813	0.0033	0.0802
Chr4	130001	140000	0.0028	0.0719	0.0027	0.0757	0.0033	0.0747	0.0027	0.0704	0.0036	0.0906	0.0029	0.0615
Chr4	140001	150000	0.0029	0.0814	0.003	0.0883	0.0033	0.0971	0.003	0.0898	0.0029	0.0849	0.0034	0.0928
Chr4	150001	160000	0.0034	0.0998	0.0035	0.0997	0.0034	0.0908	0.0027	0.0759	0.0029	0.0817	0.0032	0.0827
Chr4	160001	170000	0.003	0.0803	0.0026	0.0723	0.0035	0.0854	0.0029	0.0783	0.0032	0.0787	0.0033	0.0748
Chr4	170001	180000	0.0029	0.0903	0.0025	0.0767	0.0033	0.0937	0.0028	0.0787	0.0033	0.0917	0.0027	0.0744
Chr4	180001	190000	0.0028	0.0809	0.0032	0.0903	0.003	0.0768	0.0029	0.081	0.0037	0.1012	0.0031	0.0781
Chr4	190001	200000	0.0032	0.0929	0.0031	0.092	0.0033	0.0808	0.0029	0.0781	0.0027	0.07	0.0034	0.0767
Chr4	200001	210000	0.0035	0.0959	0.0029	0.0779	0.0035	0.0857	0.0032	0.0764	0.0025	0.0589	0.0029	0.0625
Chr4	210001	220000	0.0028	0.0882	0.0033	0.0954	0.0033	0.0863	0.0035	0.1024	0.0035	0.0969	0.0033	0.0852
Chr4	220001	230000	0.003	0.0833	0.0028	0.0765	0.0036	0.0898	0.0031	0.0819	0.0028	0.0721	0.003	0.0701
Chr4	230001	240000	0.0031	0.0914	0.003	0.0875	0.0034	0.0948	0.0032	0.0904	0.0031	0.0921	0.0032	0.0879
Chr4	240001	250000	0.003	0.0827	0.0029	0.08	0.003	0.0784	0.003	0.083	0.0032	0.0823	0.0029	0.0721
Chr4	250001	260000	0.0034	0.1069	0.0031	0.1055	0.0036	0.1075	0.0029	0.089	0.0033	0.1055	0.0038	0.104
Chr4	260001	270000	0.0029	0.0853	0.0026	0.0743	0.0029	0.0802	0.0034	0.0975	0.0032	0.093	0.0032	0.0865
Chr4	270001	280000	0.0028	0.0884	0.003	0.0856	0.0029	0.0832	0.0027	0.081	0.0028	0.0847	0.0032	0.0888
Chr4	280001	290000	0.0032	0.1031	0.0028	0.0901	0.0038	0.1077	0.0031	0.0917	0.0031	0.087	0.0034	0.0866
Chr4	290001	300000	0.0035	0.1156	0.0043	0.1367	0.0039	0.1196	0.0027	0.0839	0.0032	0.0963	0.0032	0.0946
Chr4	300001	310000	0.0034	0.1054	0.0035	0.1101	0.0033	0.0963	0.0033	0.0969	0.0032	0.0913	0.0043	0.1125
Chr4	310001	320000	0.0032	0.0954	0.003	0.0926	0.0034	0.0931	0.003	0.0846	0.0029	0.0834	0.0027	0.0708
Chr4	320001	330000	0.0031	0.0941	0.0038	0.1132	0.0035	0.1045	0.0035	0.0979	0.0031	0.0885	0.0027	0.072
Chr4	330001	340000	0.003	0.0917	0.0034	0.1051	0.0028	0.0805	0.003	0.085	0.0034	0.0976	0.003	0.0785
Chr4	340001	350000	0.0027	0.0861	0.0029	0.0942	0.0033	0.1007	0.0031	0.0913	0.0028	0.0844	0.0033	0.0888
Chr4	350001	360000	0.0028	0.0918	0.0028	0.0947	0.0034	0.105	0.0026	0.0795	0.0029	0.0853	0.0032	0.091
Chr4	360001	370000	0.0032	0.1041	0.0034	0.1105	0.0029	0.0856	0.0031	0.0972	0.0032	0.1012	0.0033	0.0933
Chr4	370001	380000	0.0025	0.0775	0.0026	0.0806	0.0032	0.0961	0.0029	0.0855	0.0031	0.0904	0.0032	0.0902
Chr4	380001	390000	0.0027	0.0749	0.0032	0.0873	0.0031	0.0778	0.0028	0.0779	0.003	0.0838	0.0034	0.0834
Chr4	390001	400000	0.0028	0.0735	0.0026	0.0676	0.0027	0.0672	0.0025	0.0663	0.003	0.0768	0.0028	0.0689
Chr4	400001	410000	0.0032	0.0941	0.0022	0.0664	0.0029	0.0736	0.0028	0.0807	0.0033	0.0924	0.0033	0.0823
Chr4	410001	420000	0.0035	0.1117	0.0038	0.1137	0.0037	0.1073	0.0029	0.0869	0.003	0.0896	0.003	0.0787
Chr4	420001	430000	0.0033	0.0961	0.0027	0.0778	0.0031	0.0874	0.0034	0.093	0.0038	0.1011	0.0036	0.0873
Chr4	430001	440000	0.0029	0.0917	0.0029	0.0894	0.0032	0.0951	0.0033	0.0978	0.0038	0.1168	0.0034	0.0932
Chr4	440001	450000	0.003	0.0855	0.0035	0.0974	0.0038	0.0945	0.0026	0.0727	0.0027	0.0742	0.0027	0.0681
Chr4	450001	460000	0.0034	0.0994	0.0035	0.106	0.0039	0.1065	0.0032	0.0932	0.0036	0.1028	0.0032	0.0844
Chr4	460001	470000	0.003	0.0933	0.0028	0.0921	0.0035	0.1051	0.003	0.0896	0.0035	0.0994	0.0034	0.0936
Chr4	470001	480000	0.0026	0.0827	0.0032	0.0979	0.0034	0.0968	0.0027	0.0757	0.0026	0.0746	0.0031	0.0835
Chr4	480001	490000	0.0031	0.0955	0.0037	0.1122	0.0043	0.1224	0.003	0.0891	0.0033	0.0926	0.0039	0.1058
Chr4	490001	500000	0.0029	0.0783	0.0029	0.0774	0.0032	0.0838	0.0033	0.0853	0.0028	0.0694	0.0031	0.0785
Chr4	500001	510000	0.0033	0.0979	0.0028	0.0828	0.0032	0.0871	0.0028	0.0765	0.0031	0.0908	0.0028	0.0734
Chr4	510001	520000	0.0025	0.0747	0.0029	0.0865	0.0036	0.0961	0.0037	0.1057	0.0028	0.0787	0.0034	0.0857
Chr4	520001	530000	0.0031	0.1062	0.003	0.0992	0.0031	0.0948	0.0029	0.0895	0.0032	0.0942	0.0032	0.0886
Chr4	530001	540000	0.0025	0.0753	0.0032	0.0945	0.0033	0.0888	0.0028	0.0798	0.003	0.0865	0.0033	0.0907
Chr4	540001	550000	0.0034	0.1013	0.0029	0.09	0.003	0.0781	0.0032	0.0891	0.0028	0.076	0.0034	0.0805
Chr4	550001	560000	0.0037	0.0996	0.0032	0.0827	0.0037	0.0926	0.0028	0.0751	0.0031	0.0787	0.0033	0.078
Chr4	560001	570000	0.0033	0.0892	0.0032	0.0914	0.0035	0.0865	0.0026	0.0685	0.0023	0.0626	0.0029	0.0683
Chr4	570001	580000	0.0036	0.1069	0.0031	0.0936	0.0033	0.0934	0.003	0.0833	0.0027	0.0788	0.0031	0.082
Chr4	580001	590000	0.0031	0.0971	0.0031	0.0978	0.0035	0.1048	0.0029	0.0838	0.0023	0.0671	0.0029	0.079
Chr4	590001	600000	0.0028	0.0827	0.0034	0.1025	0.0032	0.0946	0.0031	0.092	0.0028	0.0831	0.0037	0.1011
Chr4	600001	610000	0.0031	0.0927	0.0033	0.0927	0.0032	0.0836	0.003	0.0808	0.0034	0.0894	0.0041	0.0963
Chr4	610001	620000	0.0027	0.0871	0.0032	0.0958	0.0032	0.0912	0.0032	0.0979	0.0025	0.0736	0.0032	0.0835
Chr4	620001	630000	0.0036	0.1046	0.0035	0.0998	0.0032	0.0805	0.0035	0.0927	0.0028	0.0742	0.0036	0.0799
Chr4	630001	640000	0.0036	0.1014	0.0038	0.099	0.0034	0.0836	0.0032	0.0819	0.003	0.072	0.0031	0.0711
Chr4	640001	650000	0.003	0.0844	0.003	0.0886	0.0031	0.0843	0.0023	0.0635	0.0029	0.0811	0.0029	0.0734
Chr4	650001	660000	0.0039	0.0986	0.0036	0.0954	0.0038	0.0894	0.0027	0.0717	0.0027	0.0695	0.0028	0.0668
Chr4	660001	670000	0.003	0.0827	0.0035	0.1005	0.0029	0.0763	0.0037	0.0978	0.0034	0.094	0.0035	0.0867
Chr4	670001	680000	0.0038	0.1137	0.0043	0.1279	0.0041	0.1086	0.0033	0.0902	0.0031	0.0818	0.0031	0.0778
Chr4	680001	690000	0.0032	0.0818	0.0025	0.0659	0.0034	0.0817	0.0033	0.0842	0.0028	0.0717	0.0036	0.0872
Chr4	690001	700000	0.003	0.0901	0.0037	0.1053	0.0034	0.0945	0.003	0.0916	0.0032	0.0952	0.0032	0.0828
Chr4	700001	710000	0.0024	0.0793	0.003	0.0981	0.0029	0.0878	0.0038	0.1119	0.0033	0.0951	0.0037	0.0986
Chr4	710001	720000	0.0034	0.0999	0.0035	0.1019	0.0033	0.0943	0.004	0.1019	0.0039	0.1046	0.0045	0.1079
Chr4	720001	730000	0.0029	0.0833	0.0032	0.0901	0.0028	0.0738	0.003	0.0875	0.0031	0.0859	0.003	0.0755
Chr4	730001	740000	0.0031	0.0852	0.0028	0.0776	0.0034	0.0891	0.0024	0.0688	0.0032	0.0879	0.0033	0.083
Chr4	740001	750000	0.0034	0.0975	0.003	0.0873	0.0032	0.0866	0.0033	0.0913	0.0034	0.0959	0.0034	0.0875
Chr4	750001	760000	0.0033	0.0982	0.0029	0.087	0.0036	0.0968	0.0025	0.0698	0.0029	0.0828	0.0031	0.0775
Chr4	760001	770000	0.0034	0.098	0.003	0.0917	0.0031	0.0836	0.0033	0.094	0.0031	0.0856	0.0032	0.0816
Chr4	770001	780000	0.0035	0.1105	0.0029	0.0909	0.0034	0.099	0.0028	0.0755	0.0022	0.0623	0.0027	0.0694
Chr4	780001	790000	0.0035	0.0924	0.0033	0.0837	0.0038	0.0974	0.0026	0.065	0.0031	0.0834	0.0036	0.0823
Chr4	790001	800000	0.0032	0.0929	0.0035	0.1037	0.0041	0.1154	0.0029	0.0794	0.0031	0.0819	0.0029	0.0744
Chr4	800001	810000	0.0033	0.0968	0.0035	0.1035	0.0031	0.0879	0.0029	0.0865	0.0028	0.0832	0.0035	0.0918
Chr4	810001	820000	0.0033	0.1045	0.0034	0.1047	0.0038	0.1084	0.0026	0.0769	0.0025	0.0736	0.0029	0.0799
Chr4	820001	830000	0.0031	0.0918	0.0029	0.085	0.0035	0.095	0.0038	0.1025	0.0036	0.099	0.0035	0.0847
Chr4	830001	840000	0.0035	0.1079	0.0032	0.0998	0.0039	0.1073	0.0028	0.0808	0.0026	0.0752	0.0028	0.0729
Chr4	840001	850000	0.027	0.2284	0.0081	0.1333	0.0044	0.0388	0.0023	0.0274	0.0044	0.0833	0.0021	0.0227
Chr4	850001	860000	0.0042	0.1168	0.0033	0.1004	0.0032	0.077	0.0029	0.0791	0.0028	0.0826	0.0029	0.0661
Chr4	860001	870000	0.0033	0.1052	0.0034	0.1114	0.003	0.09	0.0023	0.0662	0.0032	0.0933	0.0031	0.0852
Chr4	870001	880000	0.004	0.1131	0.0031	0.0904	0.004	0.1017	0.0031	0.0889	0.0032	0.0924	0.0029	0.0694
Chr4	880001	890000	0.0057	0.1379	0.0041	0.1126	0.0046	0.0935	0.0028	0.0666	0.0031	0.087	0.0032	0.0647
Chr4	890001	900000	0.0028	0.0815	0.0037	0.1097	0.0036	0.1026	0.0037	0.1068	0.0034	0.0991	0.0037	0.1006
Chr4	900001	910000	0.0036	0.1083	0.0041	0.1228	0.0037	0.0961	0.003	0.0861	0.0033	0.0965	0.0032	0.0824
Chr4	910001	920000	0.0028	0.088	0.0023	0.0696	0.0031	0.0839	0.0037	0.11	0.0035	0.1016	0.0033	0.0846
Chr4	920001	930000	0.0028	0.0792	0.0035	0.1007	0.0031	0.0833	0.0029	0.0811	0.0031	0.0861	0.0034	0.0861
Chr4	930001	940000	0.0024	0.0737	0.0031	0.0968	0.0033	0.0939	0.0029	0.0833	0.0029	0.086	0.0031	0.0851
Chr4	940001	950000	0.0031	0.1097	0.0032	0.1118	0.0035	0.1147	0.003	0.0989	0.0033	0.1046	0.0032	0.0963
Chr4	950001	960000	0.0031	0.0787	0.0029	0.0798	0.0033	0.0794	0.0033	0.0782	0.0031	0.0764	0.0034	0.08
Chr4	960001	970000	0.0035	0.0964	0.0034	0.0972	0.0034	0.0902	0.0029	0.083	0.0034	0.0946	0.0029	0.0734
Chr4	970001	980000	0.0035	0.1086	0.0035	0.1157	0.0037	0.1144	0.0034	0.0971	0.0036	0.107	0.0039	0.1065
Chr4	980001	990000	0.0035	0.1264	0.003	0.1097	0.0042	0.1407	0.0028	0.0944	0.0029	0.0981	0.0033	0.1071
Chr4	990001	1000000	0.0033	0.1025	0.0031	0.0927	0.004	0.1119	0.0034	0.0942	0.004	0.1075	0.0033	0.0883
Chr4	1000001	1010000	0.0034	0.1133	0.0032	0.1044	0.0033	0.1044	0.0026	0.0781	0.0028	0.0847	0.0028	0.0785
Chr4	1010001	1020000	0.0031	0.0942	0.0032	0.0982	0.0032	0.0896	0.0027	0.0769	0.003	0.0845	0.0031	0.0801
Chr4	1020001	1030000	0.0029	0.0991	0.0035	0.12	0.0039	0.1197	0.0029	0.0918	0.0027	0.0834	0.0031	0.0854
Chr4	1030001	1040000	0.0032	0.1001	0.0029	0.0881	0.003	0.0874	0.0025	0.0727	0.0033	0.0985	0.0027	0.0755
Chr4	1040001	1050000	0.0035	0.1046	0.0032	0.0966	0.0035	0.0981	0.0027	0.076	0.0028	0.0798	0.0034	0.09
Chr4	1050001	1060000	0.0029	0.0921	0.0029	0.0969	0.0035	0.107	0.0025	0.0763	0.0031	0.095	0.003	0.0863
Chr4	1060001	1070000	0.003	0.0964	0.0037	0.1146	0.0036	0.1112	0.0032	0.0929	0.0036	0.1026	0.0032	0.087
Chr4	1070001	1080000	0.003	0.0817	0.0034	0.0943	0.003	0.0766	0.0032	0.0855	0.0033	0.0882	0.0035	0.0839
Chr4	1080001	1090000	0.0032	0.1058	0.003	0.0998	0.0039	0.1181	0.0028	0.085	0.0034	0.1032	0.0029	0.0837
Chr4	1090001	1100000	0.0029	0.0895	0.0034	0.1034	0.0032	0.0951	0.0032	0.0888	0.0022	0.0661	0.0029	0.0795
Chr4	1100001	1110000	0.0029	0.0946	0.0032	0.104	0.0035	0.1066	0.0029	0.0849	0.003	0.0845	0.0035	0.0898
Chr4	1110001	1120000	0.003	0.096	0.0032	0.1082	0.0031	0.0878	0.0031	0.0926	0.0032	0.0956	0.0034	0.0948
Chr4	1120001	1130000	0.0032	0.1055	0.0035	0.1142	0.0037	0.1039	0.003	0.0875	0.0028	0.0831	0.0033	0.0826
Chr4	1130001	1140000	0.0026	0.0837	0.0032	0.0971	0.0033	0.0987	0.0029	0.0876	0.0028	0.0827	0.003	0.0832
Chr4	1140001	1150000	0.0038	0.1137	0.0033	0.0952	0.0034	0.0993	0.0024	0.0667	0.0027	0.0712	0.0036	0.0881
Chr4	1150001	1160000	0.0032	0.1024	0.0028	0.0871	0.0031	0.0971	0.0028	0.0785	0.0027	0.073	0.003	0.0813
Chr4	1160001	1170000	0.0028	0.0874	0.0032	0.0984	0.0032	0.0894	0.0034	0.0917	0.0027	0.0736	0.0039	0.0946
Chr4	1170001	1180000	0.0035	0.1072	0.0037	0.1049	0.0033	0.0888	0.0021	0.06	0.0027	0.0733	0.003	0.0735
Chr4	1180001	1190000	0.0034	0.1006	0.0035	0.1018	0.0033	0.0903	0.0031	0.0908	0.0029	0.0829	0.0034	0.0878
Chr4	1190001	1200000	0.0025	0.0878	0.0034	0.1147	0.0035	0.1099	0.003	0.0986	0.0034	0.1071	0.0034	0.1036
Chr4	1200001	1210000	0.0031	0.1005	0.0033	0.1099	0.0033	0.102	0.0031	0.0916	0.003	0.0868	0.0029	0.084
Chr4	1210001	1220000	0.0033	0.1014	0.0036	0.1093	0.0033	0.0953	0.0026	0.0783	0.0028	0.0853	0.0031	0.0824
Chr4	1220001	1230000	0.0031	0.0972	0.0032	0.1042	0.0032	0.094	0.0029	0.0817	0.0028	0.0776	0.0029	0.0779
Chr4	1230001	1240000	0.0038	0.1044	0.0036	0.1006	0.0035	0.0873	0.0027	0.0793	0.0031	0.0817	0.0038	0.0987
Chr4	1240001	1250000	0.003	0.0968	0.003	0.0957	0.0032	0.096	0.0031	0.0933	0.0033	0.0986	0.0033	0.0948
Chr4	1250001	1260000	0.0032	0.0958	0.0033	0.1004	0.0035	0.0968	0.0028	0.0817	0.0024	0.0641	0.0028	0.0727
Chr4	1260001	1270000	0.003	0.0896	0.0029	0.0864	0.0031	0.0882	0.003	0.0873	0.0033	0.0899	0.0031	0.0852
Chr4	1270001	1280000	0.0026	0.0813	0.0027	0.0855	0.0033	0.0928	0.0025	0.0723	0.003	0.0848	0.0032	0.0848
Chr4	1280001	1290000	0.0035	0.1208	0.003	0.1024	0.0034	0.1098	0.0029	0.0891	0.0026	0.0739	0.0034	0.0962
Chr4	1290001	1300000	0.0034	0.1054	0.0031	0.0989	0.0035	0.0857	0.0037	0.11	0.0038	0.1089	0.0039	0.0862
Chr4	1300001	1310000	0.0035	0.1075	0.0034	0.1123	0.0039	0.1093	0.0038	0.1062	0.0034	0.0932	0.0036	0.0945
Chr4	1310001	1320000	0.0032	0.1008	0.0028	0.0854	0.0034	0.0999	0.003	0.0856	0.0035	0.0966	0.0033	0.0898
Chr4	1320001	1330000	0.0031	0.0988	0.0033	0.1033	0.0036	0.1043	0.0029	0.0832	0.0029	0.0882	0.0033	0.0902
Chr4	1330001	1340000	0.0029	0.0938	0.0025	0.0833	0.0026	0.0792	0.0035	0.1056	0.003	0.0883	0.0037	0.1022
Chr4	1340001	1350000	0.0033	0.1038	0.0034	0.1063	0.0036	0.107	0.0029	0.0835	0.0031	0.0853	0.0033	0.0869
Chr4	1350001	1360000	0.0027	0.0927	0.0033	0.112	0.0036	0.1131	0.0028	0.0891	0.0029	0.0892	0.0029	0.0865
Chr4	1360001	1370000	0.0028	0.1083	0.0034	0.1305	0.0033	0.1154	0.0026	0.0947	0.0025	0.0883	0.0029	0.0997
Chr4	1370001	1380000	0.0034	0.117	0.0033	0.1211	0.0036	0.1193	0.0028	0.0965	0.0029	0.0995	0.0029	0.0912
Chr4	1380001	1390000	0.0029	0.0942	0.0027	0.0852	0.0031	0.0904	0.0034	0.0962	0.0037	0.1072	0.004	0.1035
Chr4	1390001	1400000	0.0036	0.1166	0.0031	0.1081	0.0033	0.1061	0.0031	0.1008	0.0033	0.1016	0.0035	0.1082
Chr4	1400001	1410000	0.0031	0.1064	0.0031	0.1021	0.0041	0.1254	0.0026	0.0818	0.0023	0.0669	0.0028	0.083
Chr4	1410001	1420000	0.0032	0.1059	0.0031	0.1003	0.0033	0.1018	0.0033	0.0952	0.003	0.0937	0.0034	0.0934
Chr4	1420001	1430000	0.0032	0.0996	0.0027	0.0779	0.0031	0.0861	0.0033	0.0958	0.003	0.0863	0.0032	0.0883
Chr4	1430001	1440000	0.003	0.1011	0.0031	0.1052	0.0035	0.1075	0.0027	0.0832	0.0023	0.0758	0.003	0.0885
Chr4	1440001	1450000	0.0031	0.0939	0.0028	0.0813	0.0029	0.0798	0.0026	0.0765	0.0028	0.0816	0.0033	0.0886
Chr4	1450001	1460000	0.003	0.0969	0.0033	0.1076	0.0036	0.106	0.003	0.0921	0.003	0.0897	0.0032	0.0919
Chr4	1460001	1470000	0.003	0.0961	0.0033	0.1089	0.0033	0.0994	0.0029	0.0876	0.0032	0.0962	0.0036	0.1022
Chr4	1470001	1480000	0.0026	0.0855	0.003	0.0934	0.0033	0.0984	0.0031	0.0929	0.003	0.0915	0.0029	0.0783
Chr4	1480001	1490000	0.0034	0.1047	0.003	0.095	0.0035	0.0961	0.0028	0.0833	0.0036	0.1008	0.0042	0.1112
Chr4	1490001	1500000	0.0029	0.0871	0.0034	0.0992	0.0035	0.0926	0.0035	0.0975	0.0034	0.0936	0.0037	0.0944
Chr4	1500001	1510000	0.0034	0.0981	0.0032	0.0931	0.0031	0.0833	0.0029	0.0813	0.003	0.0811	0.0029	0.0768
Chr4	1510001	1520000	0.0023	0.071	0.0033	0.0963	0.0031	0.0887	0.0033	0.0914	0.0032	0.0881	0.0035	0.0908
Chr4	1520001	1530000	0.0031	0.0917	0.0034	0.1009	0.0038	0.1073	0.0034	0.0918	0.0026	0.0745	0.0032	0.0858
Chr4	1530001	1540000	0.0034	0.1119	0.0036	0.1128	0.0039	0.1163	0.0028	0.0845	0.003	0.0858	0.0029	0.0795
Chr4	1540001	1550000	0.0034	0.1129	0.0026	0.0826	0.0039	0.1177	0.0031	0.0868	0.0028	0.0789	0.0026	0.0697
Chr4	1550001	1560000	0.003	0.091	0.0034	0.1032	0.0035	0.0964	0.0031	0.0841	0.0035	0.0987	0.0037	0.0968
Chr4	1560001	1570000	0.0029	0.0825	0.0025	0.0713	0.0034	0.086	0.0027	0.0781	0.0026	0.075	0.0031	0.0749
Chr4	1570001	1580000	0.0029	0.0812	0.0034	0.0956	0.0032	0.0861	0.0025	0.0705	0.0022	0.064	0.003	0.0786
Chr4	1580001	1590000	0.003	0.0921	0.0032	0.1023	0.0032	0.0886	0.0034	0.0915	0.0039	0.1039	0.004	0.097
Chr4	1590001	1600000	0.003	0.099	0.0029	0.0931	0.0032	0.1007	0.0028	0.0846	0.0031	0.0922	0.0038	0.1065
Chr4	1600001	1610000	0.0029	0.0895	0.0029	0.0875	0.0032	0.0946	0.003	0.0849	0.0029	0.083	0.0032	0.0853
Chr4	1610001	1620000	0.003	0.0842	0.0034	0.102	0.0033	0.0868	0.0027	0.0762	0.0023	0.063	0.0031	0.0792
Chr4	1620001	1630000	0.003	0.0834	0.0027	0.076	0.0031	0.0776	0.0035	0.0946	0.0032	0.086	0.0039	0.0895
Chr4	1630001	1640000	0.0033	0.0912	0.0037	0.0979	0.0037	0.0831	0.0033	0.0831	0.0032	0.0833	0.0033	0.0724
Chr4	1640001	1650000	0.0027	0.0852	0.0027	0.0837	0.0031	0.0855	0.003	0.0848	0.0025	0.0669	0.0027	0.0647
Chr4	1650001	1660000	0.0036	0.1041	0.0042	0.1192	0.0042	0.1094	0.003	0.0799	0.0037	0.0993	0.0033	0.079
Chr4	1660001	1670000	0.0028	0.0801	0.0029	0.0896	0.003	0.0808	0.0026	0.0714	0.003	0.0834	0.0028	0.0723
Chr4	1670001	1680000	0.0034	0.1002	0.0037	0.1079	0.0037	0.1043	0.0029	0.0842	0.0028	0.0816	0.0029	0.0796
Chr4	1680001	1690000	0.0032	0.1027	0.0028	0.0838	0.0031	0.0884	0.0028	0.0786	0.0027	0.0776	0.0032	0.084
Chr4	1690001	1700000	0.0033	0.1045	0.0031	0.0989	0.0032	0.0946	0.0028	0.0832	0.003	0.0925	0.003	0.0839
Chr4	1700001	1710000	0.0025	0.0719	0.0031	0.0897	0.0027	0.0736	0.0034	0.09	0.0038	0.1037	0.0039	0.0957
Chr4	1710001	1720000	0.0031	0.0816	0.0027	0.0697	0.0031	0.0699	0.0035	0.0883	0.0032	0.0794	0.0036	0.0756
Chr4	1720001	1730000	0.0033	0.0986	0.0034	0.1037	0.0041	0.1149	0.0036	0.1021	0.0033	0.0896	0.004	0.1054
Chr4	1730001	1740000	0.0032	0.0886	0.0037	0.102	0.0032	0.0833	0.0027	0.0728	0.0028	0.0775	0.0028	0.0696
Chr4	1740001	1750000	0.0032	0.09	0.0034	0.0903	0.0035	0.0938	0.003	0.0824	0.0031	0.0787	0.003	0.0781
Chr4	1750001	1760000	0.0034	0.0872	0.0036	0.0941	0.0032	0.0765	0.0032	0.0862	0.0035	0.094	0.0035	0.0857
Chr4	1760001	1770000	0.0026	0.0787	0.0028	0.086	0.0028	0.0828	0.0028	0.0814	0.0029	0.0817	0.0029	0.0798
Chr4	1770001	1780000	0.003	0.0873	0.0038	0.1058	0.0035	0.0938	0.0024	0.0694	0.0033	0.0944	0.003	0.0705
Chr4	1780001	1790000	0.0029	0.08	0.0031	0.0838	0.0034	0.0886	0.003	0.0786	0.0027	0.0698	0.0028	0.0681
Chr4	1790001	1800000	0.0029	0.0771	0.0027	0.0722	0.0036	0.0861	0.0028	0.0711	0.0025	0.0613	0.0029	0.0659
Chr4	1800001	1810000	0.0031	0.0951	0.0024	0.0725	0.0033	0.0905	0.0029	0.0856	0.0027	0.0801	0.0032	0.0829
Chr4	1810001	1820000	0.0029	0.09	0.0036	0.1143	0.0035	0.0984	0.0031	0.0913	0.0031	0.0885	0.0038	0.097
Chr4	1820001	1830000	0.0036	0.0946	0.0035	0.0947	0.0036	0.0828	0.0032	0.0813	0.0034	0.0805	0.0036	0.0768
Chr4	1830001	1840000	0.0032	0.1003	0.0034	0.107	0.003	0.0928	0.0027	0.0864	0.003	0.0934	0.0032	0.0907
Chr4	1840001	1850000	0.0031	0.0906	0.0026	0.0775	0.003	0.0784	0.0026	0.0744	0.0031	0.0863	0.0027	0.0716
Chr4	1850001	1860000	0.0026	0.0728	0.0025	0.0716	0.0027	0.0726	0.0029	0.0815	0.0035	0.0955	0.0028	0.0709
Chr4	1860001	1870000	0.0032	0.0896	0.0032	0.0906	0.0028	0.0734	0.003	0.0801	0.0028	0.0687	0.0029	0.0694
Chr4	1870001	1880000	0.0031	0.0905	0.0028	0.0773	0.0032	0.0879	0.003	0.0828	0.0032	0.0894	0.0033	0.0815
Chr4	1880001	1890000	0.0029	0.0852	0.0026	0.0763	0.0033	0.0858	0.003	0.0857	0.0038	0.1015	0.0031	0.0765
Chr4	1890001	1900000	0.003	0.0802	0.0036	0.0917	0.0033	0.0824	0.0026	0.0699	0.0031	0.0767	0.0034	0.0809
Chr4	1900001	1910000	0.0028	0.0777	0.0029	0.0816	0.0036	0.0998	0.0026	0.0723	0.0031	0.0889	0.003	0.0781
Chr4	1910001	1920000	0.0031	0.0877	0.0029	0.0825	0.0035	0.089	0.0031	0.0804	0.003	0.0817	0.0032	0.0764
Chr4	1920001	1930000	0.0033	0.0818	0.0032	0.0861	0.0036	0.0814	0.003	0.0772	0.003	0.0773	0.0036	0.0801
Chr4	1930001	1940000	0.0034	0.0909	0.0031	0.0815	0.003	0.0701	0.0032	0.0814	0.0031	0.075	0.0031	0.0682
Chr4	1940001	1950000	0.003	0.0745	0.003	0.0749	0.0032	0.0744	0.0031	0.0763	0.0029	0.0721	0.0027	0.0604
Chr4	1950001	1960000	0.0035	0.093	0.0034	0.0916	0.0036	0.0809	0.0028	0.0724	0.003	0.0777	0.003	0.0679
Chr4	1960001	1970000	0.0036	0.0919	0.0038	0.0997	0.0048	0.1028	0.0034	0.0846	0.003	0.0736	0.0032	0.0692
Chr4	1970001	1980000	0.0031	0.0959	0.0031	0.0936	0.0029	0.0865	0.0026	0.0743	0.0026	0.0716	0.0031	0.0836
Chr4	1980001	1990000	0.004	0.1082	0.0035	0.1028	0.0042	0.1135	0.0034	0.092	0.0034	0.0905	0.0031	0.0796
Chr4	1990001	2000000	0.0038	0.103	0.0038	0.1039	0.0039	0.097	0.0028	0.0767	0.0033	0.0893	0.0035	0.0817
Chr4	2000001	2010000	0.0029	0.0938	0.0032	0.1013	0.0033	0.097	0.0027	0.081	0.0027	0.0766	0.0034	0.093
Chr4	2010001	2020000	0.0027	0.0746	0.0029	0.0833	0.0027	0.0712	0.0033	0.0905	0.0035	0.0938	0.0038	0.0886
Chr4	2020001	2030000	0.0033	0.0903	0.0033	0.093	0.0028	0.0658	0.0029	0.0768	0.003	0.0769	0.0035	0.0757
Chr4	2030001	2040000	0.0032	0.0952	0.0026	0.0825	0.0034	0.0956	0.0026	0.0741	0.0029	0.0825	0.0028	0.0771
Chr4	2040001	2050000	0.0037	0.1009	0.0034	0.0965	0.0034	0.0838	0.003	0.0763	0.0027	0.0716	0.0032	0.0724
Chr4	2050001	2060000	0.0035	0.107	0.004	0.122	0.0035	0.0998	0.0028	0.0831	0.0032	0.0874	0.003	0.0801
Chr4	2060001	2070000	0.0036	0.0973	0.0038	0.1028	0.0034	0.0812	0.0042	0.1052	0.0033	0.081	0.0042	0.0878
Chr4	2070001	2080000	0.0026	0.0763	0.003	0.0894	0.0035	0.0901	0.0028	0.0795	0.0026	0.075	0.0032	0.0815
Chr4	2080001	2090000	0.0033	0.0997	0.0034	0.1012	0.0034	0.0987	0.0025	0.0716	0.0029	0.0826	0.003	0.0768
Chr4	2090001	2100000	0.0037	0.1017	0.0036	0.0964	0.0037	0.0944	0.0028	0.0749	0.0027	0.0722	0.0029	0.0715
Chr4	2100001	2110000	0.0039	0.1086	0.0034	0.0936	0.0037	0.0897	0.0033	0.0885	0.0025	0.0705	0.0032	0.0775
Chr4	2110001	2120000	0.0031	0.0913	0.0031	0.0898	0.0036	0.0981	0.0029	0.0843	0.0031	0.0887	0.0034	0.0897
Chr4	2120001	2130000	0.0033	0.1062	0.0036	0.1171	0.0037	0.1129	0.0028	0.0832	0.0032	0.094	0.0036	0.1001
Chr4	2130001	2140000	0.0027	0.0948	0.0031	0.0987	0.0029	0.0924	0.0034	0.1045	0.0029	0.0893	0.0032	0.0934
Chr4	2140001	2150000	0.0029	0.0914	0.0023	0.0707	0.0032	0.0914	0.0029	0.0828	0.0037	0.1044	0.0033	0.0906
Chr4	2150001	2160000	0.0029	0.0821	0.0028	0.077	0.0034	0.081	0.0029	0.0782	0.0032	0.0822	0.0033	0.0772
Chr4	2160001	2170000	0.0033	0.1016	0.0025	0.0739	0.0032	0.0868	0.0033	0.102	0.0035	0.1028	0.0039	0.1027
Chr4	2170001	2180000	0.0038	0.1093	0.0036	0.1048	0.0031	0.0884	0.0027	0.0769	0.0031	0.0866	0.0031	0.0817
Chr4	2180001	2190000	0.0036	0.1023	0.0038	0.1064	0.0041	0.1011	0.0035	0.092	0.0033	0.0813	0.004	0.0908
Chr4	2190001	2200000	0.0031	0.0945	0.0032	0.0965	0.0038	0.1034	0.0029	0.0811	0.0028	0.0817	0.0027	0.0702
Chr4	2200001	2210000	0.0031	0.101	0.003	0.0972	0.0031	0.0983	0.003	0.0908	0.0035	0.1044	0.0037	0.0996
Chr4	2210001	2220000	0.003	0.0881	0.0031	0.089	0.0034	0.0947	0.0027	0.0766	0.0033	0.0944	0.0036	0.095
Chr4	2220001	2230000	0.0042	0.1229	0.0033	0.0975	0.0039	0.1001	0.0029	0.0838	0.0031	0.0878	0.0029	0.0695
Chr4	2230001	2240000	0.0036	0.1021	0.0037	0.1094	0.0036	0.0944	0.0022	0.0624	0.0033	0.0899	0.003	0.0742
Chr4	2240001	2250000	0.0033	0.0896	0.0037	0.1024	0.0037	0.0894	0.0028	0.0713	0.0032	0.083	0.003	0.0676
Chr4	2250001	2260000	0.0029	0.0892	0.0028	0.0832	0.0031	0.0873	0.0024	0.0731	0.0029	0.083	0.0028	0.075
[truncated: 1,620 more rows]
