# Supplementary material for: A unique chromatin profile defines adaptive genomic regions in a fungal plant pathogen
Source: eLife journal article supplement (doi:10.7554/elife.62208), 2020-12-18
Supplement: supp [file elife-62208-supp-v1.zip › elife_poa_e62208_Figure_2_figure_supplement_1.pdf]

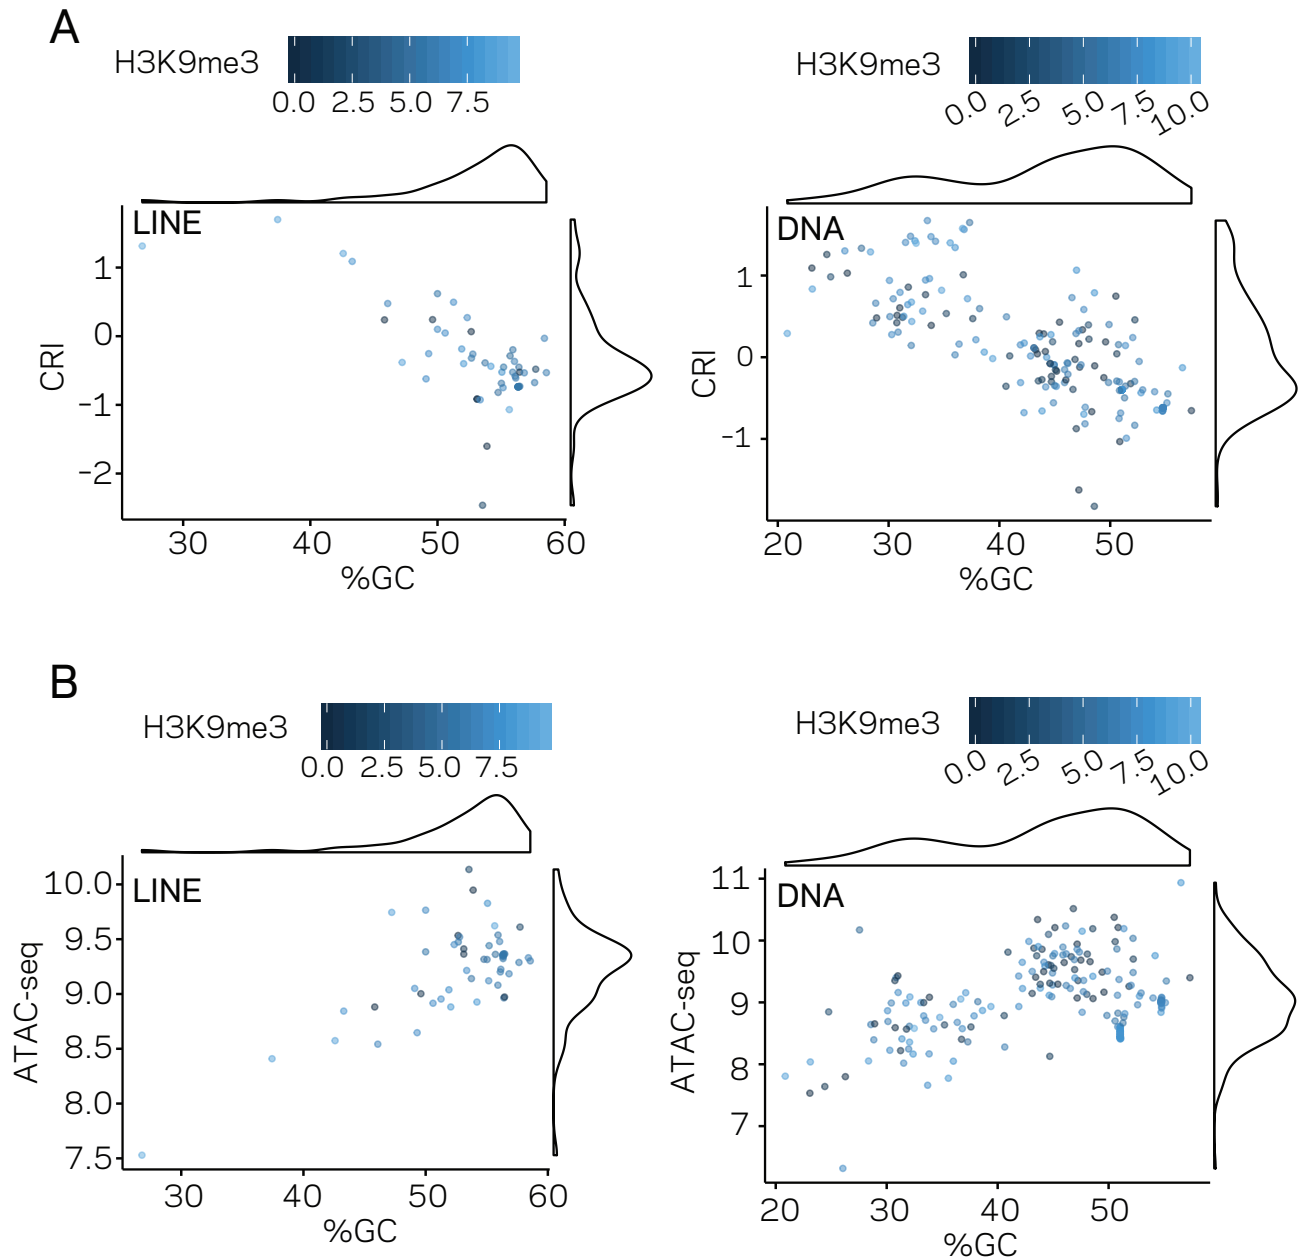

Figure 2- figure supplement 1. Genomic distribution of DNA characteristics by TE classes. (A) Scatter plot for %GC sequence content versus CRI values for individual TE elements shown as points, separated by TE type, LINE and DNA, labeled in the top left of each plot. Each point is colored according to TPM values from H3K9me3 ChIP-seq, scale shown above each plot. A density plot is shown opposite to each respective labeled axis. (B) Similar to (A), but the y-axis is showing the log2 TPM values from ATAC-seq. %GC, The percent GC sequence content; CRI, Composite RIP index; ATAC-seq, Log2 of (TPM+1) values of mapped reads from Assay for Transposase Accessible Chromatin.
