# Supplementary material for: A unique chromatin profile defines adaptive genomic regions in a fungal plant pathogen
Source: eLife journal article supplement (doi:10.7554/elife.62208), 2020-12-18
Supplement: supp [file elife-62208-supp-v1.zip › elife_poa_e62208_Figure_2_figure_supplement_2.pdf]

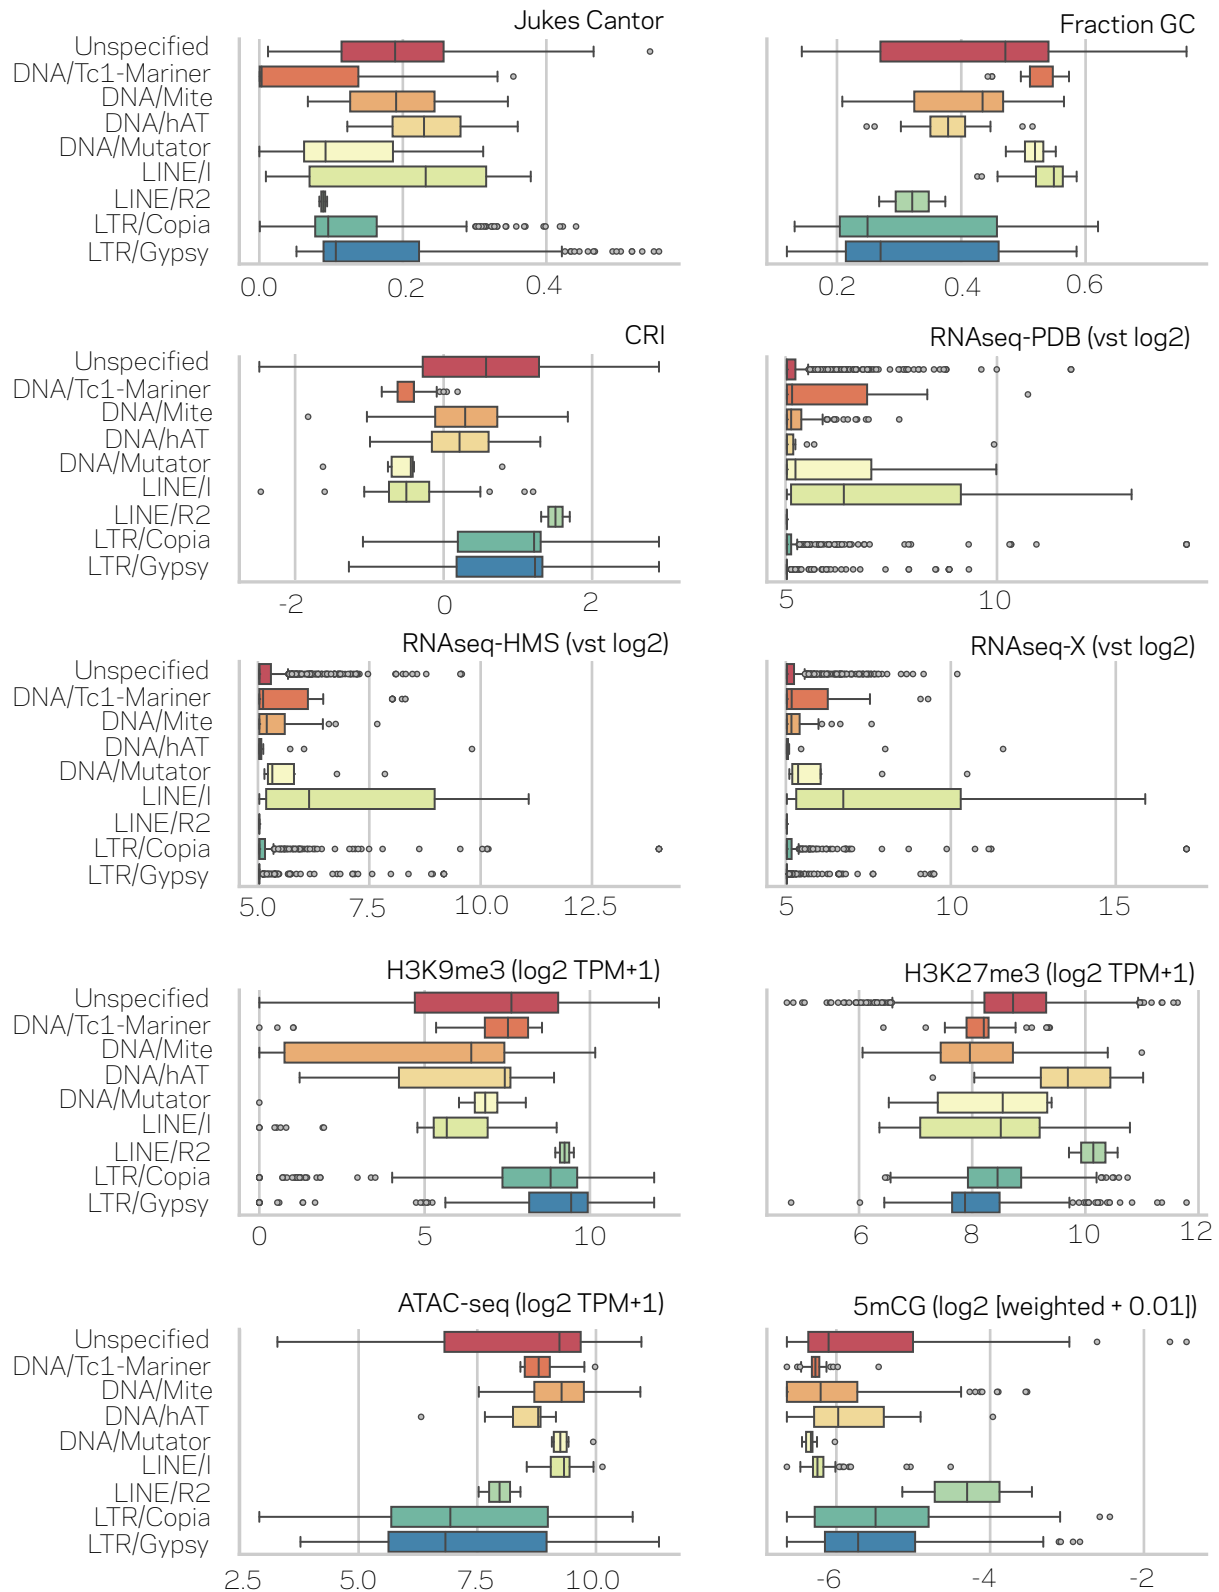

Figure 2- figure supplement 2. Characterization of TEs in nine sub-classes across genomic variables. Each data type is shown in the upper right corner of the individual box plots. Outliers are shown as individual points. The nine subclasses of TEs are listed to the left of each figure. Test for significant differences between means of the nine subclasses per data type are shown in supplementary table 4 (Kruskal-Wallis test) and significance of individual pair-wise differences are shown in supplementary table 5 (Conover test and BH correction).
