# Supplementary material for: A unique chromatin profile defines adaptive genomic regions in a fungal plant pathogen
Source: eLife journal article supplement (doi:10.7554/elife.62208), 2020-12-18
Supplement: supp [file elife-62208-supp-v1.zip › elife_poa_e62208_Figure_2_figure_supplement_3.pdf]

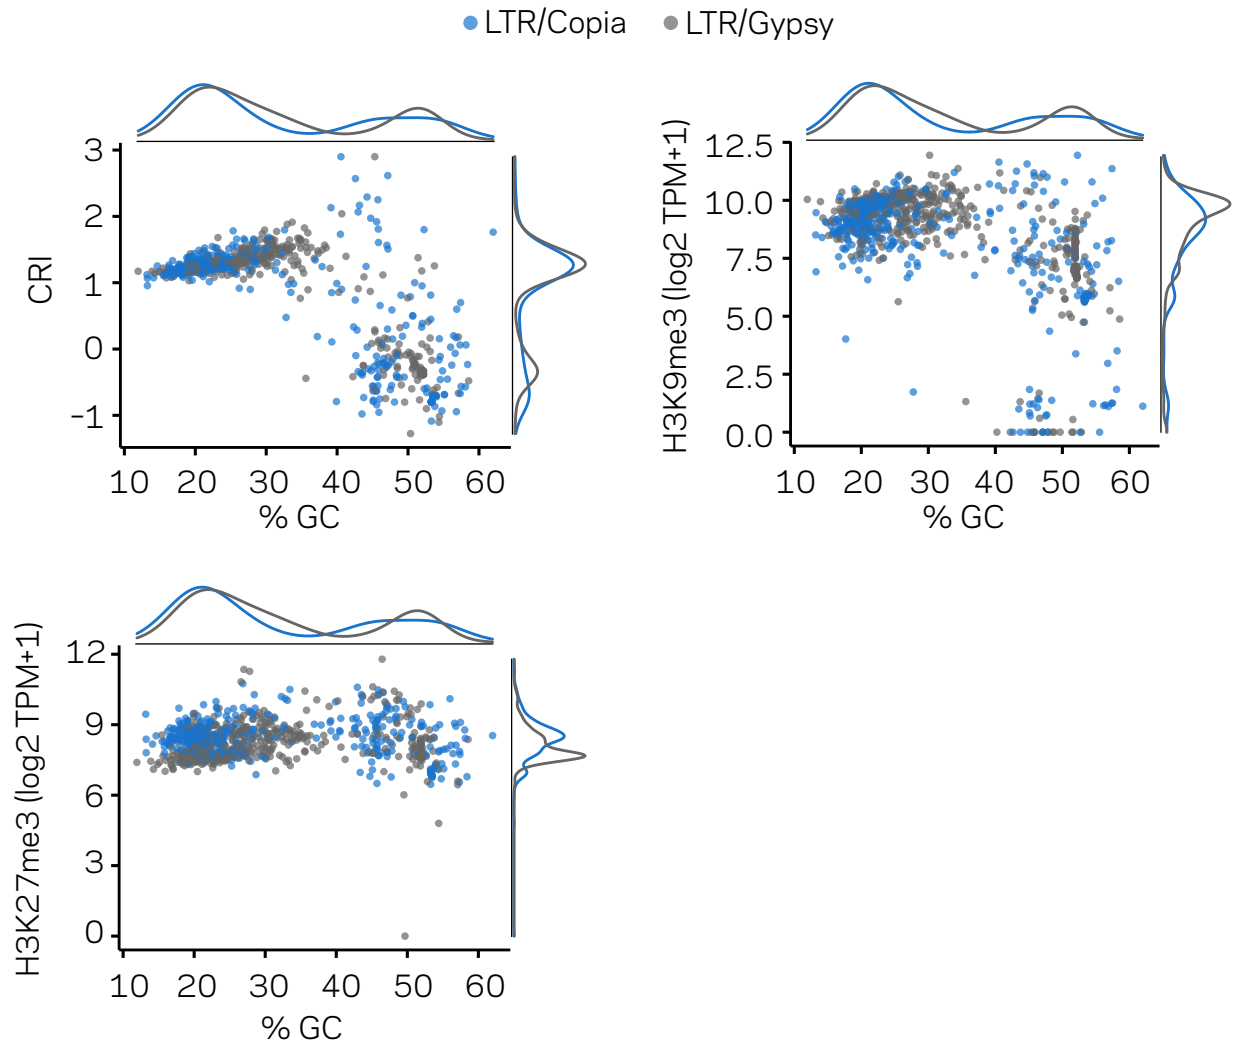

Figure 2- figure supplement 3. The LTR subclass distinction does not account for the bimodal distribution of LTR elements in the genome. The same TEs are shown in three separate scatter plots with marginal densities. Individual Copia elements are shown as blue points, and Gypsy elements as grey points. These plots are related to those shown in Figure 2, but only for the LTR elements. All plots show the % GC variable in the x-axis and different y-axis variables for reference. Clustered patterns of points are not simply accounted for by the two sub-classes of LTR elements.
