# Supplementary material for: A unique chromatin profile defines adaptive genomic regions in a fungal plant pathogen
Source: eLife journal article supplement (doi:10.7554/elife.62208), 2020-12-18
Supplement: supp [file elife-62208-supp-v1.zip › elife_poa_e62208_Figure_2_source_data_1.txt]

seqnames	start.x	end	width	class	Juke_gap	length_element	gc_element	identity	Is.LS	CRI	vst.PD.med	vst.MS.med	vst.X.med	TPM.M	TPM.K9	TPM.K27	TPM.atac	whgt_mCG	whgt_mCHG
Chr2	3467514	3467969	456	LTR/Gypsy	0.124138069414317	455	0.496703296703297	91.647855530474	LS	-0.0887799564270152	5.17029132765031	5.11186440223292	5.13529487615267	0	0	0	2100.00412067512	0.010648596321394	0.00407166123778502
Chr5	952311	953474	1164	Unspecified	0.0835648755364807	1163	0.632846087704213	92.7335640138408	LS	-0.643605870020964	6.05780025596732	6.31722282999581	6.76609329348366	0	44.6311121170422	90.1322995012239	950.968430019456	0.00282599919257166	0.0036281179138322
Chr2	3612146	3612686	541	LINE/I	0.317143747454175	540	0.559259259259259	78.270509977827	LS	-0.197435897435898	6.71601874794193	6.91482268189443	7.57606249695327	3204.77345768423	39.3322445587447	90.9611112851844	742.291972021456	0.00278260869565217	0.0033178500331785
Chr5	1029187	1030593	1407	Unspecified	0.0542667889908257	1406	0.630867709815078	95.5840455840456	LS	-0.533640978311029	6.20419571373533	6.7201696993535	7.23988485395084	4753.38481463647	39.4060481881335	97.9322555733246	1060.80757873875	0.00282542885973764	0.0028906955736224
Chr2	3613384	3613824	441	LINE/I	0.351922972972973	440	0.584090909090909	74.2857142857143	LS	-0.0307692307692308	5.82129267650313	5.90729537341983	6.19820644131811	7.62556238496496	82.6148180905669	101.273616827318	642.847674516874	0.00200320512820513	0.00204778156996587
Chr2	2981248	2986776	5529	LTR/Copia	0.000723065798987708	5528	0.534732272069464	100	LS	-0.703106978085352	14.4831756733613	14.0036494916267	17.1446508566856	376.736170384252	53.2564167981292	106.002583581784	578.611279766022	0.00320980449372629	0.00283114256825076
Chr2	3340971	3346499	5529	LTR/Copia	0.000723065798987708	5528	0.534732272069464	100	LS	-0.703106978085352	14.4831746134743	14.0036508143913	17.1446171587255	376.736170384252	55.7290361494709	111.057895756201	560.083079421025	0.00317437671648179	0.0034377998081228
Chr2	3306771	3312299	5529	LTR/Copia	0.00090293564714389	5528	0.534913169319826	99.9819102749638	LS	-0.699608923559518	14.4827822343317	14.0026586050052	17.1443647982845	365.228152317852	52.2103086110231	111.216867837157	576.600467325479	0.00280535174794994	0.00248158821645853
Chr4	1189506	1190696	1191	Unspecified	0.0602076730608841	1190	0.640336134453781	94.8739495798319	LS	-0.660429447852761	5.98913633762197	6.5910332831696	7.24764687218664	0	60.7110140799708	116.757706685068	1054.89254878201	0.00322164948453608	0.00402371876323592
Chr2	3582575	3584030	1456	LINE/I	0.315273176470588	773	0.564036222509702	80.3834808259587	LS	-0.451368666278393	8.17832111942844	7.95715624414003	10.2493905485173	0	34.9450540940204	119.407844174572	498.470387485485	0.00752764055516349	0.00508302270416808
Chr4	1190696	1196569	5874	LTR/Copia	0.00384596420323326	5177	0.532934131736527	99.9806837937029	LS	-0.795034940489486	5.03065184543009	5.59429654235764	5.55932687186173	204.665575175896	52.6039542156347	124.613471089346	639.992963445441	0.00201938610662359	0.00352586958244196
Chr2	3606169	3612042	5874	LTR/Copia	0.00365665896843726	5177	0.533127293799498	100	LS	-0.797188626658825	6.04128482728727	6.00429072891022	5.51862573045069	204.095476080699	54.3643814979503	124.73317663314	642.088419916376	0.00254989888332014	0.0039324092820433
Chr2	3555512	3561034	5523	LINE/I	0.0093571726618705	5522	0.563382832307135	99.7464686707715	LS	-0.735464416409861	11.7431930751897	11.017646186785	12.2676425508254	409.888135412378	47.7289867613122	124.833216730779	651.564223177093	0.0030186780705616	0.00287967393230551
Chr5	3644181	3650054	5874	LTR/Copia	0.00365665896843726	5177	0.533127293799498	100	LS	-0.797188626658825	5.03065184543009	5.10919404715617	5.17425132346575	210.936665223068	54.4538947495935	125.361630738057	653.37684671141	0.00320122638531945	0.00343135299046403
Chr2	2975373	2981246	5874	LTR/Copia	0.00365665896843726	5177	0.533127293799498	100	LS	-0.797188626658825	5.03065184543009	5.10919404715617	5.27188723911098	213.217061603858	49.0532619004557	126.498833404099	644.589448607491	0.00312858024147352	0.00301717468667801
Chr4	1446097	1446726	630	Unspecified	0.0399875118110236	629	0.650238473767886	96.9793322734499	LS	-0.473684210526316	5.99496864969649	6.43713498344325	6.99480516614825	0	32.9211114705648	127.038842648633	1066.24850576804	0.00354889589905363	0.00374953130858643
Chr5	1031960	1033542	1583	Unspecified	0.0692720974983964	1582	0.647914032869785	94.7231270358306	LS	-0.533683657383079	6.32800991136893	6.25690382198874	5.32244454412134	2.11740789816548	1.99476969126633	128.711398443395	911.836487382321	0.00362431396914156	0.00343453771122407
Chr2	3219273	3224795	5523	LINE/I	0.00917840287769784	5522	0.563382832307135	99.7645780514306	LS	-0.737005248459168	11.744869385852	11.020060598872	12.267970282618	413.526195785861	47.9828643504681	130.944378794091	657.818894634272	0.00372536845201137	0.00407173574892488
Chr2	3376999	3382485	5487	LINE/I	0.00960075294117647	5486	0.564163324826832	99.7448049580751	LS	-0.733907396950875	11.7416987672852	11.015937870826	12.2659053389672	411.968053550545	49.7352272167118	131.131017833747	658.879984812953	0.00281839583540568	0.00338874387507441
Chr2	3306259	3306483	225	LTR/Copia	0.133092433628319	224	0.450892857142857	88.7892376681614	LS	-0.791666666666667	5.03065184543009	5.34902897245022	5.32244454412134	0	0.785682830566037	133.962849816954	761.801638949275	0.0138539042821159	0.0127226463104326
Chr5	3497896	3503060	5165	LTR/Copia	0.00385802469135802	5164	0.53272656855151	100	LS	-0.795532997519753	5.17029132765031	5.37464576477666	5.32823389296419	250.277367496001	55.619739981289	138.0499141006	661.379599121615	0.00305580159433127	0.00295974743488556
Chr5	3643385	3644064	680	DNA/Tc1-Mariner	0.278213352855051	679	0.518409425625921	78.2805429864253	LS	-0.323613086770982	10.7317819475988	6.12229331293026	6.6244192625206	4.93749540855401	1.0336712166149	143.847927360709	611.77199615604	0.00402488108305891	0.00267236771779797
Chr5	1023595	1023701	107	DNA/Mutator	0.311961652173913	106	0.471698113207547	81.1881188118812	LS	-1.625	5.03065184543009	5.41094810408159	5.34309862928145	0	0	162.338958229162	982.849555546929	0.00242130750605327	0.00173611111111111
Chr5	1031256	1031989	734	Unspecified	0.0721543404255319	733	0.60300136425648	93.8483547925608	LS	-0.693223443223443	6.38550688048405	6.84859711393337	7.11299408190335	4.57325394398855	81.6197807168486	168.045651369548	854.028716102214	0.00249376558603491	0.00312283136710618
Chr5	1028284	1029086	803	Unspecified	0.0575628784119107	802	0.605985037406484	95.0062421972534	LS	-0.855664174813111	6.27826612603986	6.12266072165233	5.79613111058765	0	22.0923026127826	179.896061669445	869.656207857535	0.00291474374544571	0.00269632625547691
Chr2	3465751	3466204	454	LTR/Gypsy	0.0989173626373626	453	0.507726269315673	94.2660550458716	LS	-0.158862876254181	5.03065184543009	5.03065184543009	5.10471848180467	8783.80433181758	430.265643915954	183.503301930418	2568.56424223409	0.0104506858262573	0.00651819663226507
Chr5	951024	951686	663	Unspecified	0.0655845112781955	662	0.602719033232628	94.1087613293051	LS	-0.772045028142589	6.52052401966432	6.69918560846455	7.18124773052989	0	33.6631217011509	195.666589078554	892.319423670355	0.00278637770897833	0.00197433366238894
Chr5	737935	738974	1040	Unspecified	0.0471770588235294	1039	0.644850818094321	96.8208092485549	LS	-0.757051282051282	6.01003971376498	6.20669501050307	5.40950345593699	3.22506925529828	45.4053525598891	198.582501939641	783.515516630146	0.00109229929000546	0.00274197970935015
Chr5	780947	781297	351	Unspecified	0.106929247910864	350	0.491428571428571	92.5287356321839	LS	-0.27953216374269	5.13283576313994	5.03065184543009	5.03065184543009	0	0.502026565089474	202.917703526039	229.735938650544	0.00344827586206897	0.00467289719626168
Chr2	3510927	3511140	214	LTR/Copia	0.0363783181818182	213	0.460093896713615	99.5305164319249	LS	-0.752747252747253	5.03065184543009	5.11186440223292	5.2023543974499	0	471.076153741741	203.910488769658	1012.89493836798	0.00646551724137931	0.0087719298245614
Chr2	3506029	3506188	160	LTR/Copia	0.239454649681529	159	0.459119496855346	82.5503355704698	LS	-0.227272727272727	5.03065184543009	5.03065184543009	5.03065184543009	0	0	205.757161921015	1198.29649439065	0.00238095238095238	0
Chr5	1049925	1051138	1214	Unspecified	0.0792664922322159	1213	0.56883759274526	93.2343234323432	LS	-0.880838990779208	5.03065184543009	5.03065184543009	5.03065184543009	2.762064263201	41.3442900724759	207.33553280008	734.891508879053	0.00219868079152508	0.0031813361611877
Chr2	3561962	3567835	5874	LTR/Copia	0.0104218302540416	5177	0.526366621595519	99.3239327796021	LS	-0.655582036427447	5.89740911390729	7.1846554550778	5.77785082280676	206.375872461489	68.9252037652389	207.599339324398	640.060558815471	0.00256076193899097	0.00329428989751098
Chr5	793891	799378	5488	LINE/I	0.109914317770539	5487	0.56114452341899	90.6976744186046	LS	-0.58232895910307	8.45817054188848	7.65688284259847	10.4543573330538	3.05105895643421	61.7025971545296	208.592605129405	587.638414892437	0.00369586399220509	0.0039778028777685
Chr2	3018587	3019063	477	LTR/Gypsy	0.0537840637450199	476	0.521008403361345	99.7899159663866	LS	-0.378662244333886	5.23377660576055	5.14536808661724	5.56479235781017	7.04762502526235	393.202002350521	209.393473414196	627.551430790713	0.00292911540714704	0.00285388127853881
Chr2	3019063	3025046	5984	LTR/Gypsy	0.0793429033333333	5983	0.521644659869631	93.1138730265368	LS	-0.384302161032037	5.1295646765902	5.38143945838056	6.63806959206941	339.686807992104	97.5326334252814	210.127133397418	539.113190260508	0.00269895948009517	0.0029523018728665
Chr2	3500106	3508438	8333	LINE/I	0.304502752688172	1404	0.560541310541311	78.0320366132723	LS	-0.367128523650263	13.1838707945084	10.2308970198339	12.2263441040226	1.60730855215442	67.0670973362796	211.965915504641	712.416870922222	0.00275442157146999	0.00450281425891182
Chr2	3440733	3446716	5984	LTR/Gypsy	0.0791642833333333	5983	0.521477519638977	93.1306684581794	LS	-0.384302161032037	5.03065184543009	5.03065184543009	5.03065184543009	342.484887135367	102.453198715206	212.624100591432	527.10340719132	0.00311526479750779	0.00356138706654171
Chr5	931778	931991	214	LTR/Copia	0.0363783181818182	213	0.450704225352113	99.5305164319249	LS	-0.63395225464191	5.03065184543009	5.03065184543009	5.16928288619553	0	65.2895020098202	219.659672861624	1078.42418576702	0	0.0013550135501355
Chr2	2986826	2987031	206	LTR/Copia	0.256211497584541	205	0.463414634146341	81.9587628865979	LS	0.0625	5.13159268805071	5.22281708988933	5.10471848180467	0	1.71771834525712	223.966725270675	986.462973030557	0	0
Chr5	740346	744025	3680	Unspecified	0.0933560519199567	3679	0.594455014949715	91.7029379760609	LS	-0.621577520216927	6.68010240004029	7.23470968241172	7.49283683451069	138.346527140822	79.7912396104348	224.079144256882	863.338798949492	0.00247635084938834	0.00307830918237105
Chr4	1448116	1449138	1023	Unspecified	0.046119652173913	1022	0.645792563600783	96.767874632713	LS	-0.735869565217391	6.01003971376498	6.20669501050307	5.42798299967553	0	64.5229519856034	226.156952117668	1009.98843613971	0.00432783337841493	0.00234604105571848
Chr5	949996	951050	1055	Unspecified	0.0532417630331754	1054	0.63472485768501	95.9692898272553	LS	-0.792429792429792	8.14153018265333	6.16569813573531	5.47928077451871	0	2.99499608916626	227.294567473908	940.847437788513	0.00200277307040518	0.00318725099601594
Chr2	3524667	3530540	5874	LTR/Copia	0.0141182640492687	5177	0.522696542399073	98.9569248599575	LS	-0.598558043319542	6.85540214558321	7.79866464389241	6.3539042479986	108.888927182719	58.1537758175111	227.380680436324	625.324768148899	0.00274085240509799	0.00335345405767941
Chr5	1051168	1051445	278	Unspecified	0.0507081850533808	277	0.555956678700361	96.3898916967509	LS	0.788617886178862	5.03065184543009	5.03065184543009	5.03065184543009	12.1290648079696	79.3511192102474	227.936704012931	871.498289011302	0.00114942528735632	0.00182815356489945
Chr5	3651743	3655355	3613	DNA/Mutator	0.164087004008016	3612	0.552048726467331	87.3065015479876	LS	-0.448145061639702	9.16851671636951	6.77351486223155	7.91876873351964	2.78118683494845	64.7747734903523	238.407695895673	649.625387911559	0.00241945753215332	0.00277574872169467
Chr5	994095	997392	3298	Unspecified	0.0130415558912387	3297	0.59387321807704	99.0900818926297	LS	-0.663311688311688	8.74152072494012	9.54527506120449	7.51694824501887	247.821523188078	82.2347234743635	239.706283782976	1016.62583379896	0.00357611697071205	0.00460579788675156
Chr2	3255348	3256115	768	LINE/I	0.0478311683417085	767	0.526727509778357	98.8265971316819	LS	-0.319043181112147	7.06303867751365	6.96402167931776	7.14327780248895	926.495874730964	50.0918960787906	241.338878172771	710.414278814813	0.00173490631505899	0.00346363186541316
Chr4	1187086	1188152	1067	Unspecified	0.0423190361445783	1066	0.642589118198874	96.9981238273921	LS	-0.874014155712841	6.4972817119514	6.26640475789667	5.48452285384202	0	65.6410340049524	243.873800179891	934.718678070524	0.00234903965731657	0.00328502415458937
Chr4	1196571	1196797	227	LTR/Copia	0.0088257268722467	226	0.455752212389381	99.5575221238938	LS	-0.841269841269841	5.83707465598175	5.92459378399797	7.00470617216303	0	39.7136481423446	249.923894455892	904.977629222826	0.00485436893203883	0.0013531799729364
Chr5	949381	949573	193	Unspecified	0.249819106145251	192	0.635416666666667	83.1325301204819	LS	-1.41666666666667	5.03065184543009	5.03065184543009	5.03065184543009	0	122.92028451819	251.171060486799	920.605055905465	0.00362756952841596	0.00324675324675325
Chr5	1048989	1049377	389	Unspecified	0.116337404580153	388	0.587628865979381	90.2061855670103	LS	-0.527355623100304	5.13283576313994	5.10919404715617	5.09975004453444	8.65018575452097	0.452731966966993	254.737108993015	762.045399284373	0.00569105691056911	0.00362483008608971
Chr2	3508484	3508729	246	LINE/I	0.330888671875	245	0.526530612244898	79.5555555555556	LS	0.0666666666666667	6.71067372352814	5.75413160118781	7.79610588552936	0	0	258.550237892862	740.158220621918	0.00480384307445957	0.00252844500632111
Chr2	3025046	3025522	477	LTR/Gypsy	0.0537840637450199	476	0.521008403361345	99.7899159663866	LS	-0.378662244333886	5.23377660576055	5.14536808661724	5.56479235781017	0	292.872785990913	262.296771467606	723.647854946415	0.00289435600578871	0.00284414106939704
Chr5	738967	739650	684	Unspecified	0.0539207278020378	683	0.598828696925329	95.3147877013177	LS	-0.65	6.37938889644477	6.73723098226731	7.68118690435348	0	44.957877511495	262.303280906901	614.003832143644	0.00171174255391989	0.0032183908045977
Chr2	2945756	2947618	1863	DNA/Tc1-Mariner	0.00321132904608789	1862	0.547261009667025	99.8925886143931	LS	-0.621095674450685	6.82316201727528	6.10006278268234	6.16371217110353	438.914422583507	112.03474086368	262.411276037594	521.903960968979	0.00246175487954985	0.00388427538173051
Chr5	799809	803105	3297	Unspecified	0.0130526926563917	3296	0.593446601941748	99.0898058252427	LS	-0.669130722316114	8.78951995760114	9.57680879578863	7.56460276815956	263.136287931078	91.1396852396394	268.471452063226	952.487569451972	0.00340984274008855	0.00395594166925225
Chr4	1107064	1108926	1863	DNA/Tc1-Mariner	0.0042890139335477	1862	0.547261009667025	99.7851772287863	LS	-0.657582179291311	6.86891223008046	6.11914367039923	6.25900421453398	402.937830568465	110.716685088814	268.832278833764	510.813235194403	0.00339045175478787	0.00289256198347107
Chr5	695339	695566	228	LTR/Copia	0.102115877192982	227	0.436123348017621	91.1504424778761	LS	-0.353448275862069	5.42819025724052	5.72412507214193	5.76993450475327	0	194.588606527756	269.812058346844	783.302326178738	0.00350262697022767	0.00412087912087912
Chr5	991081	992709	1629	Unspecified	0.0551643902439024	1628	0.64004914004914	95.3316953316953	LS	-0.570980699519937	6.58880643585998	7.21683464570522	5.09975004453444	4.11508529440641	111.241002560763	270.558072781004	1210.76461193049	0.00273504273504274	0.00285867428979811
Chr2	3515413	3515647	235	LTR/Copia	0.210457435897436	234	0.457264957264957	84.375	LS	-0.205357142857143	6.1607509526616	5.336200348951	5.41126783243577	0	0	274.527453808175	553.643794701864	0.00291970802919708	0
Chr4	1443031	1446044	3014	Unspecified	0.104887590759076	3013	0.580816461998009	90.7308970099668	LS	-0.645900974025974	6.41112240684799	6.85177881525015	6.69640578837357	265.631351591271	85.8585432653221	274.793375611752	838.117955350698	0.00311563810665069	0.00325581395348837
Chr4	3353180	3355042	1863	DNA/Tc1-Mariner	0.0042890139335477	1862	0.547261009667025	99.7851772287863	LS	-0.657582179291311	6.86891223008046	6.11914367039923	6.27472037546738	444.310911385763	151.105679904376	276.764105817268	503.988173179279	0.00329753952819819	0.00485623003194888
Chr5	1047347	1048556	1210	Unspecified	0.143153754152824	1209	0.549214226633581	88.1756756756757	LS	-0.83639774859287	5.57850027668128	5.84172241260801	7.45679983920429	2.7712101713573	54.8247918209715	278.575015582788	668.98108120486	0.00321440051430408	0.00295234078447912
Chr2	2893746	2894076	331	LTR/Gypsy	0.254692888888889	330	0.478787878787879	83.8414634146341	LS	-0.14957264957265	5.03065184543009	5.31141375903306	5.17425132346575	0	0	280.416603653137	410.190894704528	0	0.00423728813559322
Chr5	804493	804764	272	Unspecified	0.0984242391304348	271	0.616236162361624	92.2509225092251	LS	-0.587121212121212	5.03065184543009	5.03065184543009	5.03065184543009	0	75.9231508603647	280.513537787733	1056.98329339053	0.00619718309859155	0.00469483568075117
Chr5	803812	804500	689	Unspecified	0.0476691860465116	688	0.597383720930233	95.906432748538	LS	-0.968421052631579	6.13180241945424	6.4160780834763	6.52690910154432	4.87281206259042	109.153874935291	284.438493417322	869.526374511832	0.00307881773399015	0.00255941499085923
Chr5	3695401	3697258	1858	DNA/Tc1-Mariner	0.000538213132400431	1857	0.510500807754443	100	LS	-0.400212089077413	5.03065184543009	5.03065184543009	5.03065184543009	164.134478295779	270.551745315574	287.924597056982	347.946584511479	0.00336225596529284	0.0026168876482903
Chr5	752111	756966	4856	Unspecified	0.0494115694330321	4855	0.561277033985582	95.5858085808581	LS	-0.873939412045889	6.94086829019391	7.07657145274901	6.93399867514696	2.7586500922947	63.094831084871	293.495009128831	835.052981229398	0.00292012832113186	0.00358872362504324
Chr5	1045912	1047285	1374	Unspecified	0.122061868050408	1373	0.541879096868172	89.5802098950525	LS	-0.735714285714286	5.89569333338252	6.90085935093264	5.85713577726861	0	72.0239802958831	293.690746280876	740.608770270841	0.00308810172570391	0.00319616460247703
Chr2	3018150	3018587	438	Unspecified	0.140945054704595	437	0.187643020594966	91.2240184757506	LS	1.22972972972973	5.03065184543009	5.03065184543009	5.03065184543009	0	447.662614988248	295.029138595795	54.6220201124352	0.032258064516129	0
Chr4	1449570	1449694	125	Unspecified	0.257012066115702	124	0.693548387096774	81.5789473684211	LS	-1.25	5.03065184543009	5.03065184543009	5.03065184543009	0	0	295.736925413698	1294.023781623	0.00444938820912125	0.00403632694248234
Chr4	1428385	1434945	6561	Unspecified	0.0252157446808511	6560	0.551371951219512	97.9242979242979	LS	-0.76475487115022	7.6993094221166	7.27810047131812	7.32036431176398	429.234640488897	84.1977921746524	299.452497462951	713.354644166357	0.0029012118986412	0.00286597782638208
Chr2	3440257	3440733	477	LTR/Gypsy	0.051792828685259	476	0.51890756302521	100	LS	-0.378662244333886	5.03065184543009	5.03065184543009	5.03065184543009	7.04762502526235	220.945590438989	302.251709857594	663.483137214149	0.00301386377335744	0.00232558139534884
Chr5	973429	973956	528	Unspecified	0.181442715105163	527	0.52561669829222	85.0194552529183	LS	-0.518218623481781	5.13159268805071	5.27048677072414	5.312094263902	6.36430016539851	15.322308889632	302.679336292975	561.422983908497	0.00388500388500388	0.00522344747533372
Chr5	983974	986454	2481	Unspecified	0.0474994451145959	2480	0.553225806451613	95.7223567393059	LS	-0.716479390254154	5.83819054438994	6.79445343662708	6.36886392266396	1.35039204800307	65.7999070198898	305.024791391228	760.536531214557	0.00259034622188527	0.00284925652212626
Chr4	1173232	1175094	1863	DNA/Tc1-Mariner	0.0042890139335477	1862	0.547261009667025	99.7851772287863	LS	-0.657582179291311	6.87512555085161	6.12638545977165	6.25900421453398	464.098036994036	143.668079460484	306.319603981991	513.159350262102	0.00272791270679338	0.00364520048602673
Chr4	1182369	1183836	1468	Unspecified	0.199148848484848	1467	0.584185412406271	84.2797783933518	LS	-0.723170731707317	5.50555557596776	5.41684098631875	5.03065184543009	25.1185816896288	110.072235191094	315.255083015591	758.100979459537	0.00341804131371675	0.00463522773075373
Chr5	986951	988394	1444	Unspecified	0.0271121197522368	1443	0.571032571032571	97.990297990298	LS	-0.585831702544031	5.13283576313994	5.85313155019121	5.24744857759222	2.32151309778059	128.55013380497	326.229650069662	862.37891827722	0.00270653434720969	0.00276548672566372
Chr2	2947632	2949489	1858	DNA/Tc1-Mariner	0.000538213132400431	1857	0.510500807754443	100	LS	-0.400212089077413	5.03065184543009	5.03065184543009	5.03065184543009	205.61901676614	264.415714804229	326.83844427514	390.504279851236	0.00367845937466191	0.0022883295194508
Chr5	780007	780935	929	Unspecified	0.112423138297872	928	0.537715517241379	90.8108108108108	LS	-0.414285714285714	5.13159268805071	5.10919404715617	5.2433495225701	0	54.2443223722297	327.380586866903	307.43103473854	0.00138504155124654	0.00249687890137328
Chr2	3519307	3519445	139	LTR/Copia	0.203094055944056	138	0.471014492753623	85.9259259259259	LS	0.300751879699248	5.03065184543009	5.22391028834331	5.35315680208378	0	0	329.649844820072	1045.89871990473	0.00503778337531486	0.00904977375565611
Chr2	3439101	3439534	434	LTR/Gypsy	0.0605426879271071	433	0.533487297921478	95.6018518518518	LS	-0.169985775248933	5.03065184543009	5.03065184543009	5.03065184543009	0	187.780015215539	333.150503840129	712.985948949107	0.00302114803625378	0.00165929203539823
Chr5	737379	737503	125	Unspecified	0.257012066115702	124	0.693548387096774	81.5789473684211	LS	-1.125	5.03065184543009	5.03065184543009	5.03065184543009	0	0	334.311306989398	1365.01760505368	0.00591715976331361	0.00431499460625674
Chr2	3446716	3447192	477	LTR/Gypsy	0.051792828685259	476	0.51890756302521	100	LS	-0.378662244333886	5.03065184543009	5.03065184543009	5.03065184543009	0	365.168838955924	340.72683571462	722.8122338668	0.00445930880713489	0.00572519083969466
Chr2	3448107	3448540	434	LTR/Gypsy	0.0629733029612756	433	0.526558891454965	95.3703703703704	LS	0.0284495021337126	5.03065184543009	5.03065184543009	5.03065184543009	0	426.662151202477	340.879270107483	778.220488092647	0.00505902192242833	0.00325732899022801
Chr4	1188126	1188810	685	Unspecified	0.05401903930131	684	0.595029239766082	95.1754385964912	LS	-0.600174596246181	6.27733625618145	6.72425553020273	7.74673028378842	0	61.8227706634122	343.479547022275	895.539882505185	0.00343824385083311	0.00275576989321392
Chr4	1447422	1448106	685	Unspecified	0.0526400583090379	684	0.599415204678363	95.1754385964912	LS	-0.6625	6.43933616508095	6.81306667685491	7.80344091631561	9.80269952269287	70.2881293019707	346.052427524315	919.947848154256	0.00187793427230047	0.00473634354278497
Chr2	3260262	3260752	491	LTR/Gypsy	0.0676945945945946	490	0.508163265306122	98.5714285714286	LS	-0.231237322515213	5.54627398113857	5.86246762999861	5.6589031614711	0	326.766935274434	351.096115150603	729.715933583863	0.00404390525707683	0.0054678007290401
Chr4	1452427	1453769	1343	Unspecified	0.18700206921944	1342	0.582712369597616	84.748309541698	LS	-0.715702947845805	5.40683693656421	5.37053423574382	5.03065184543009	24.9636233184162	163.187085569774	351.193391957734	761.281337036091	0.00337723741979061	0.00312337324310255
Chr4	3355042	3355200	159	Unspecified	0.215111479289941	158	0.443037974683544	85.9872611464968	LS	-0.844444444444444	5.50700313148535	5.26672321719341	5.52227501206387	0	131.684445882259	352.574761535855	836.818625748003	0	0
Chr5	757237	758972	1736	Unspecified	0.0566620725388601	1735	0.536023054755043	94.6943483275663	LS	-0.295917870870433	6.95392243830184	5.62143681573788	5.68439574691646	3372.71939826317	59.6149308059824	354.293064048091	798.875919683639	0.00254032770227359	0.00315457413249211
Chr5	1026751	1027600	850	LINE/I	0.165942898719441	849	0.547703180212014	87.065868263473	LS	-0.818803418803419	5.03065184543009	5.03065184543009	5.72642994578025	0	30.165402827322	355.599998708063	636.569831876367	0.00380745172695132	0.00392798690671031
Chr5	1055200	1057642	2443	Unspecified	0.10176530995106	2442	0.52948402948403	91.2309592424866	LS	-0.567096666108226	6.82855063960553	6.83657053062284	5.61090403418136	1.37141412822598	55.9141598842443	356.782741074054	570.4200757731	0.00359642301710731	0.00247923639519028
Chr2	3439534	3450407	10874	LTR/Gypsy	0.180350465049929	3505	0.382310984308131	84.1728677733257	LS	1.56681959833795	5.13159268805071	5.03065184543009	5.2023543974499	1106.94450733661	287.467559230597	372.451643984576	462.416195947433	0.0431014010923771	0.0303582270795386
Chr4	1129336	1129912	577	LINE/I	0.043426510851419	576	0.527777777777778	99.4791666666667	LS	-0.260364842454395	6.37868435688889	6.39727141352165	6.69513401605955	611.304866321669	62.4652010423068	374.37648592068	733.094006281191	0.00364797081623347	0.00208623087621697
Chr2	3511622	3512104	483	LINE/I	0.300068444444444	482	0.5	81.2217194570136	LS	0.100606060606061	6.40170416990362	6.33045998878849	6.78641035285283	0	115.833497394511	378.855851571732	868.933001031874	0.00159914712153518	0.00417661097852029
Chr4	1118466	1119917	1452	Unspecified	0.039185219478738	1451	0.544452101998622	96.6230186078567	LS	-0.792462751971954	6.08358873168091	6.95876557513945	6.50535775419439	2.30870474965491	59.2079744110006	380.541447054068	750.315693194121	0.00321027287319422	0.0031386224934612
Chr4	1074837	1075094	258	Unspecified	0.226854160583942	257	0.249027237354086	85.3754940711462	LS	1.34722222222222	5.03065184543009	5.03065184543009	5.03065184543009	0	121.823805767532	380.972245119379	184.505787207916	0.0961538461538462	0.4
Chr5	973954	981971	8018	Unspecified	0.0995179962616823	8017	0.551203692154172	91.3879808901182	LS	-0.566501057082452	7.86772403527482	7.02144942828344	6.67112487507896	681.969378925945	79.2104729151203	382.036838219513	683.914572982635	0.00269926152279093	0.00327182691740848
Chr5	733300	734646	1347	Unspecified	0.190047352941176	1346	0.581723625557207	84.5980465815177	LS	-0.668609022556391	5.37474612076129	5.37053423574382	5.03065184543009	2.48893820594767	72.2974241821603	387.646244984647	763.14881274709	0.00450240645862444	0.00347463516330785
Chr5	997427	997790	364	Unspecified	0.110878410958904	363	0.515151515151515	90.3314917127072	LS	-0.952380952380952	6.35493506629	6.21892810749622	5.41966625470559	18.4951485469592	123.419486630215	388.348592904528	648.010297168133	0.00362581580855693	0.00359281437125749
Chr5	732315	732660	346	Unspecified	0.176583571428571	345	0.602898550724638	85.2173913043478	LS	-0.706563706563706	5.17489244698057	6.11158437381165	5.03065184543009	0	166.039448885145	389.257373768738	884.993168112387	0.0025062656641604	0.00252908447142135
Chr4	1471418	1473871	2454	Unspecified	0.114443174603175	2453	0.530370974317163	90.1726973684211	LS	-0.601634997790543	6.46856868942927	6.11955595327131	5.37914008809626	0	65.5955444439216	396.104082187991	577.57365649721	0.0021883920076118	0.00329147872729489
Chr4	1454409	1454754	346	Unspecified	0.178929487179487	345	0.602898550724638	85.2173913043478	LS	-0.733590733590733	5.17489244698057	6.18510038571181	5.03065184543009	0	36.6712893243264	402.539121430138	822.685956798086	0.00239712345185777	0.00514258999532492
Chr5	729275	731667	2393	Unspecified	0.0812649356044869	2392	0.543896321070234	92.8870292887029	LS	-0.754507462686567	6.17240177976764	7.08497884656541	6.57614691531849	1.40009280091996	72.2519320030109	406.724091883304	711.667124611712	0.00398200722660571	0.00426257459505541
Chr4	1455402	1457798	2397	Unspecified	0.0922789375	2396	0.545075125208681	91.8238993710692	LS	-0.677929022848809	6.12191671026051	7.05554841647234	6.54595191033346	0	31.7494595857379	407.952494734239	682.636130602648	0.00252067743205987	0.00363159487541612
Chr5	1027601	1027759	159	LINE/I	0.274045652173913	158	0.550632911392405	78.343949044586	LS	-0.523809523809524	5.03065184543009	5.03065184543009	5.03065184543009	0	160.699662771571	413.016149227715	907.60690828862	0.00290416263310745	0.00201207243460765
Chr2	3479386	3481245	1860	DNA/Tc1-Mariner	0.28381877373847	1859	0.513717052178591	77.5555555555556	LS	-0.353988603988604	7.94975472796299	8.3085993138463	9.31119193590607	1.8017340618943	39.6998176437197	422.76802484024	432.809443470022	0.00323869156860628	0.00268456375838926
Chr2	3492697	3492937	241	DNA/Tc1-Mariner	0.35403094017094	240	0.495833333333333	75.7009345794392	LS	0.187683284457478	5.44838837078123	5.1977907162999	5.60011160503277	0	0	434.540139451781	572.959851137552	0.0128712871287129	0.00955414012738854
Chr2	3003720	3004283	564	LTR/Copia	0.0603686933797909	563	0.206039076376554	95.9147424511545	LS	1.39802802283342	5.03065184543009	5.03065184543009	5.03065184543009	0	336.69724717709	437.755931681528	103.820715096269	0	0
Chr4	1449331	1449512	182	Unspecified	0.262804564102564	181	0.674033149171271	82.6815642458101	LS	0.842105263157895	5.17489244698057	5.03065184543009	5.03065184543009	0	0.973373728979035	438.343080510529	1040.81247805354	0.00151630022744503	0
Chr5	678878	679311	434	LTR/Gypsy	0.0629733029612756	433	0.531177829099307	95.3703703703704	LS	-0.0367700072098053	5.1295646765902	5.03065184543009	5.03065184543009	0	557.256459840498	438.912568551281	800.271599915815	0.00197530864197531	0.0058173356602676
Chr2	3215508	3215609	102	Unspecified	0.127522307692308	101	0.514851485148515	93.8144329896907	LS	-0.431818181818182	5.03065184543009	5.03065184543009	5.03065184543009	0	0	442.833900489033	337.382010894474	0	0
Chr4	1186767	1186907	141	Unspecified	0.245819090909091	140	0.65	85.2713178294574	LS	1.9375	5.03065184543009	5.03065184543009	5.03065184543009	0	0	448.801058220871	1122.22708659779	0.00386100386100386	0.0034965034965035
Chr4	1100494	1100659	166	Unspecified	0.272961797752809	165	0.236363636363636	83.125	LS	0.805555555555556	5.03065184543009	5.03065184543009	5.03065184543009	0	143.157160627892	454.320494113797	605.06099514791	0	0
Chr5	737561	737742	182	Unspecified	0.262804564102564	181	0.668508287292818	82.6815642458101	LS	0.789473684210526	5.17489244698057	5.03065184543009	5.03065184543009	0	0	455.915854339459	1020.96647741269	0.00256191289496157	0.00275229357798165
Chr2	3340756	3340969	214	LTR/Copia	0.0318181818181818	213	0.455399061032864	100	LS	-0.63395225464191	5.03065184543009	5.03065184543009	5.24837790774677	0	37.1902226638216	460.870860796463	816.307196170871	0.00374531835205993	0.00506970849176172
Chr2	3007453	3017042	9590	LTR/Copia	0.0828445476536043	2068	0.166344294003868	93.4184675834971	LS	1.18481648199446	5.03065184543009	5.03065184543009	5.03065184543009	314.232342334132	493.752656264334	466.243005250467	44.4610026872642	0.0808080808080808	0
Chr5	3697258	3699658	2401	LTR/Gypsy	0.276367937240425	2400	0.180416666666667	83.5410176531672	LS	1.22166798627606	5.03065184543009	5.03065184543009	5.03065184543009	149.310355110029	405.335704564425	470.414145599782	34.5795259186157	0.0303643724696356	0.0298507462686567
Chr5	805484	805718	235	Unspecified	0.136131688311688	234	0.658119658119658	90.5405405405405	LS	-0.807971014492754	5.03065184543009	5.03065184543009	5.03065184543009	14.3674759098696	160.919983005461	479.668847862636	667.779592378864	0.00104275286757039	0.0017921146953405
Chr2	3004911	3006782	1872	LTR/Copia	0.0634348588709677	984	0.185975609756098	94.7100712105799	LS	1.23076923076923	5.03065184543009	5.03065184543009	5.03065184543009	0	269.931630146496	481.606769375752	35.8713808374748	0.0045045045045045	0
Chr5	992768	993443	676	Unspecified	0.0516481305637982	675	0.598518518518519	95.8083832335329	LS	-0.937837837837838	6.16012030919284	6.49618869986866	6.57562652747284	0	157.270621789046	481.817300235348	1252.00585645253	0.00336700336700337	0.00251831501831502
Chr4	1181509	1181854	346	Unspecified	0.176583571428571	345	0.602898550724638	85.2173913043478	LS	-0.706563706563706	5.17489244698057	6.18216858758482	5.03065184543009	0	59.5908451520305	487.337971883695	818.070607811841	0.00160771704180064	0.00240963855421687
Chr2	3008327	3015842	7516	LTR/Copia	0.0828443708609272	7505	0.224783477681546	92.7066666666667	LS	1.29485428051002	5.03065184543009	5.03065184543009	5.03065184543009	2.22758975711979	525.435274099873	497.599026827444	52.0317025052932	0.0300369685767098	0.03690036900369
Chr5	3699674	3706778	7105	LTR/Gypsy	0.227212616929699	7104	0.326858108108108	81.0387349484985	LS	1.50968464344031	5.03065184543009	5.03065184543009	5.03065184543009	2.82778140532137	667.973096513503	506.698551021136	167.977130582569	0.0271268838113758	0.0189274447949527
Chr5	915700	916382	683	LTR/Copia	0.344064928684628	682	0.545454545454545	75.2961082910322	LS	-0.461240310077519	5.03065184543009	5.10919404715617	5.03065184543009	0	83.1012461128357	511.442551085742	569.443248931332	0.00189813350205631	0.00224646983311938
Chr5	799415	799774	360	Unspecified	0.130310137741047	359	0.506963788300836	88.857938718663	LS	-1.15172413793103	6.18734101384782	5.98600079479095	5.34801157379668	9.35089912569725	103.264620744759	513.930005555575	613.119461139153	0.00248292985723153	0.00628140703517588
Chr4	1163670	1165289	1620	LINE/I	0.0740614415505754	1619	0.551575046324892	94.6263125386041	LS	-0.749253306784241	7.10693780202529	6.53021746347232	7.51603315583494	4.13797513844205	104.821161024294	516.539631213786	555.638954901465	0.00244184552114124	0.00257643421504638
Chr2	3026312	3026933	622	Unspecified	0.17944471669219	621	0.22866344605475	87.5806451612903	LS	1.13591836734694	5.13159268805071	5.03065184543009	5.03065184543009	0	202.336139017448	521.514578148887	58.8978083534946	0.0326086956521739	0
Chr2	3450866	3451319	454	LTR/Gypsy	0.129327260869565	453	0.485651214128035	91.1764705882353	LS	-0.0298507462686568	5.17489244698057	5.10919404715617	5.17381668090902	7.40624311283101	532.98672106706	529.515883960233	556.741787889372	0.0185185185185185	0.00434782608695652
Chr5	914882	915685	804	LINE/I	0.0781907451923077	803	0.520547945205479	95.6413449564134	LS	-0.4	5.03065184543009	5.11924851457382	5.32258040773578	4.17409212842845	244.678483493982	531.784564623602	470.662010210716	0.00418264203555246	0.00177777777777778
Chr5	3708471	3709837	1367	LTR/Copia	0.0581293591654247	1366	0.208638360175695	95.3313253012048	LS	1.27582046332046	5.03065184543009	5.03065184543009	5.03065184543009	0	563.487121347424	548.811244195811	75.0222441808011	0.0186915887850467	0
Chr2	3464098	3464461	364	LTR/Gypsy	0.139657674418605	363	0.484848484848485	93.5574229691877	LS	-0.261632341723875	5.13283576313994	5.03065184543009	5.10471848180467	9.2475742734796	882.812327896124	551.45500192443	533.978028292522	0.0099009900990099	0.0103338632750397
Chr4	1180593	1180863	271	Unspecified	0.265605168539326	270	0.559259259259259	78.6259541984733	LS	-0.344444444444444	5.03065184543009	5.14536808661724	5.30246363345899	0	106.817815908777	552.007207637389	838.106198067183	0.00739827373612824	0.00816993464052288
Chr2	3005600	3006487	888	Unspecified	0.272999743918054	887	0.198421645997745	80.2989130434783	LS	1.2992125984252	5.03065184543009	5.03065184543009	5.03065184543009	0	200.519382633469	557.925652153271	39.8711976757512	0	0
Chr5	768479	768944	466	LINE/I	0.234747730192719	465	0.531182795698925	80.8278867102397	LS	-0.915360501567398	5.03065184543009	5.03065184543009	5.03065184543009	0	0.755203755242355	558.617271501543	680.067694374004	0.00304083405734144	0.00226551880380607
Chr4	1410836	1411301	466	LINE/I	0.234747730192719	465	0.531182795698925	80.8278867102397	LS	-0.915360501567398	5.03065184543009	5.03065184543009	5.03065184543009	0	0.377601877621177	561.647060092738	657.826486759257	0.00167434072833822	0.00296359017781541
Chr2	3498712	3499110	399	LINE/I	0.337731447028424	387	0.496124031007752	74.6630727762803	LS	0.241687979539642	5.37424087113768	5.20046107137664	5.12828776107532	0	0.441328139083694	564.364902566388	511.896842726244	0.00548696844993141	0.00448833034111311
Chr5	660234	660447	214	Unspecified	0.0851356880733945	213	0.492957746478873	93.8967136150235	LS	0.0454545454545454	5.03065184543009	5.03065184543009	5.03065184543009	0	100.826825888583	567.79953173665	527.978507615104	0.005	0.00346020761245675
Chr2	3373216	3373343	128	LINE/I	0.366099402985075	127	0.535433070866142	73.2283464566929	LS	-2.46212121212121	5.1295646765902	5.55576101599175	5.34105995147432	0	2.78106779708296	575.996475503813	1124.60670298158	0	0
Chr4	1437398	1439286	1889	Unspecified	0.0683301985370951	1888	0.526483050847458	94.6504237288136	LS	-0.372868217054264	5.33268943692065	5.03065184543009	5.13529487615267	2109.33885725625	109.098327333898	577.005334626654	669.316100044402	0.00268034028667987	0.00360840916222152
Chr5	805314	805511	198	Unspecified	0.138308341708543	197	0.583756345177665	89.6373056994819	LS	-0.574074074074074	5.03065184543009	5.03065184543009	5.03065184543009	17.0797035051001	216.327345073096	589.046551306477	567.028589738613	0.00286532951289398	0.00104602510460251
Chr5	776986	777233	248	Unspecified	0.0975473092369478	247	0.530364372469636	91.497975708502	LS	-0.67816091954023	5.03065184543009	5.03065184543009	5.03065184543009	0	0.712224679740757	597.188574023796	682.508802526842	0.0036101083032491	0.00317208564631245
Chr5	747768	749656	1889	Unspecified	0.0678431782540512	1888	0.52489406779661	94.6504237288136	LS	-0.336111111111111	5.33268943692065	5.03065184543009	5.13529487615267	1.77404445521972	99.4419647443447	606.432979194443	702.971215068633	0.00266604845253275	0.00309345490068382
Chr2	2942362	2942542	181	LINE/I	0.344178010471204	180	0.538888888888889	75	LS	-1.60197368421053	5.1295646765902	5.32022424047655	5.387875344182	0	0	609.647628366786	986.756456444569	0.0204841713221601	0.00744416873449132
Chr4	1143359	1143598	240	LINE/I	0.221543723849372	239	0.556485355648536	83.4061135371179	LS	-1.06923076923077	5.37341608798077	5.40777637490631	5.62534658035901	0	508.690018531144	619.477195061856	787.169101048898	0.00618811881188119	0
Chr2	3006782	3007416	635	Unspecified	0.120599243570348	634	0.26813880126183	92.259083728278	LS	1.21855921855922	5.03065184543009	5.03065184543009	5.03065184543009	5.28850219115263	416.567050837947	620.182886790354	94.0568750751253	0.056390977443609	0.0303030303030303
Chr2	3004279	3005019	741	Unspecified	0.133550128865979	740	0.289189189189189	91.7232021709634	LS	1.45637960022417	5.13159268805071	5.03065184543009	5.03065184543009	0	330.262149938029	622.775299837177	119.774239320971	0.0339285714285714	0.0285714285714286
Chr5	3692346	3692524	179	DNA/Tc1-Mariner	0.138044888888889	178	0.449438202247191	88.2022471910112	LS	-0.0928571428571429	5.03065184543009	5.11186440223292	5.24256142224091	0	112.845361122315	634.406919586791	621.16860762891	0.00125944584382872	0.00197628458498024
Chr5	1007281	1007813	533	DNA/Mutator	0.061625447761194	532	0.509398496240602	94.7368421052632	LS	-0.683333333333333	5.23377660576055	5.23431273126307	5.39839042859983	4350.01714129894	110.535660748467	636.723481108496	660.785859379008	0.00146056475170399	0.00042863266180883
Chr2	3543299	3544999	1701	DNA/Tc1-Mariner	0.283354684737773	1700	0.508235294117647	77.9465370595383	LS	-0.301867064973861	5.43374218347563	5.03065184543009	5.2023543974499	3.94069674749808	112.301776547658	637.956850952558	388.743320381128	0.00252491694352159	0.0029356259173831
Chr4	1471223	1471410	188	Unspecified	0.218500731707317	187	0.540106951871658	88.5245901639344	LS	-0.21078431372549	5.27205695342783	5.24760367980728	5.10018468709118	0	147.890008499718	643.390267607595	1020.04175336849	0.00251889168765743	0
Chr2	3017422	3018050	629	Unspecified	0.10158079389313	628	0.286624203821656	94.0988835725678	LS	1.37224736048265	5.03065184543009	5.03065184543009	5.03065184543009	5.33910986762299	601.908233173447	644.054772868914	74.066413874948	0.0306513409961686	0.0222222222222222
Chr2	3026944	3027350	407	LTR/Gypsy	0.301951721698113	406	0.199507389162562	81.0026385224274	LS	1.19333333333333	5.03065184543009	5.03065184543009	5.03065184543009	0	266.920707013362	644.335040394096	65.6633107623233	0	0.0714285714285714
Chr2	3205158	3205336	179	DNA/Tc1-Mariner	0.138044888888889	178	0.449438202247191	88.2022471910112	LS	-0.0928571428571429	5.03065184543009	5.11186440223292	5.24256142224091	0	97.9972872904317	653.270349120671	710.868045553662	0.00136798905608755	0.00652173913043478
Chr2	3475719	3476384	666	DNA/Mutator	0.0931392771084337	665	0.52781954887218	92.2256097560976	LS	-0.435185185185185	5.03065184543009	5.19250503960066	5.10471848180467	0	250.936920070228	654.215314836065	548.156102037975	0.00242550242550243	0.00326086956521739
Chr5	1044253	1044522	270	Unspecified	0.250035487804878	269	0.539033457249071	80.3347280334728	LS	-0.645833333333333	5.03065184543009	5.03065184543009	5.03065184543009	0	56.2232288231174	661.60182064889	629.444050176258	0.00592768227622999	0.00356718192627824
Chr4	4083645	4086845	3201	LTR/Copia	0.171917820786346	3200	0.131875	87.0539943163877	LS	1.11994161057497	5.03065184543009	5.03065184543009	5.03065184543009	1.04645885808053	362.628115887038	696.483899271654	90.8238353804517	0.0126582278481013	0.1
Chr4	1178568	1179035	468	LTR/Gypsy	0.158595950920245	467	0.501070663811563	91.1894273127753	LS	-0.0481000481000481	6.31925525796248	5.67622689130549	5.23845559855887	7.1837379549348	66.1727032919653	709.321621721398	805.764661212252	0.00141542816702052	0.00579950289975145
Chr2	3430514	3430720	207	Unspecified	0.140251226415094	206	0.519417475728155	89.3203883495146	LS	0.12	5.03065184543009	5.11186440223292	5.09975004453444	0	203.41136853396	718.340705787476	892.585980042197	0.00718390804597701	0.00327332242225859
Chr5	727107	727894	788	Unspecified	0.105432824933687	787	0.523506988564168	90.8969210174029	LS	-0.168617614269788	5.27380527814068	5.11924851457382	5.03065184543009	0	207.083403256837	722.138161163404	646.888723178898	0.00151883353584447	0.00223015165031222
Chr5	1055005	1055192	188	Unspecified	0.224285317073171	187	0.53475935828877	87.9781420765027	LS	0	5.33268943692065	5.16639112300446	5.03065184543009	0	173.323322063364	725.585500033234	1090.46304596506	0.00308641975308642	0.00387596899224806
Chr2	3207709	3207915	207	Unspecified	0.149780938967136	206	0.519417475728155	88.8349514563107	LS	0.153846153846154	5.03065184543009	5.11186440223292	5.09975004453444	0	207.684716612405	739.770917773976	919.692712624823	0.00513478818998716	0.00408163265306122
Chr5	731688	731827	140	Unspecified	0.199687218045113	139	0.517985611510791	87.0967741935484	LS	-1.16666666666667	5.03065184543009	5.03065184543009	5.03065184543009	0	107.917522125937	748.752971841361	1061.32959948901	0	0
Chr5	878536	878659	124	LINE/I	0.316264921875	123	0.577235772357724	76.8595041322314	LS	-0.480769230769231	5.03065184543009	5.03065184543009	5.03065184543009	54.8790473278626	2.87225034780699	769.168952840046	780.826254722024	0.00129198966408269	0.0033167495854063
Chr2	3464461	3465751	1291	LTR/Gypsy	0.0978879350348028	1290	0.358139534883721	91.0077519379845	LS	1.45787545787546	5.13159268805071	5.03065184543009	5.03065184543009	3082.72085327273	480.358802543168	783.753892494321	294.071848130537	0.0459993521218011	0.0182584269662921
Chr4	1116395	1117100	706	Unspecified	0.101488660084626	705	0.51063829787234	91.1806543385491	LS	-0.250075414781297	5.27380527814068	5.03065184543009	5.03065184543009	4.75514472585173	80.6351645938314	792.771728418769	611.73041748079	0.00177556818181818	0.00049825610363727
Chr4	1459197	1459466	270	Unspecified	0.244546260162602	269	0.531598513011152	80.7531380753138	LS	-0.673611111111111	5.03065184543009	5.03065184543009	5.03065184543009	0	214.432779697471	808.478736233976	713.863605141074	0.00455062571103527	0.00216450216450216
Chr4	3352702	3352819	118	Unspecified	0.0781088235294118	117	0.461538461538462	94.017094017094	LS	1.73529411764706	5.57068253407816	5.85001905919595	5.81687692404999	0	605.673411704369	813.498236735806	971.769686552036	0.00671140939597315	0
Chr4	1074434	1074714	281	LTR/Copia	0.238109230769231	280	0.232142857142857	81.7490494296578	LS	1.4047619047619	5.03065184543009	5.03065184543009	5.03065184543009	0	180.23113562386	822.582172780733	82.51383778992	0.173913043478261	0
Chr2	3025522	3025733	212	Unspecified	0.102569045454545	211	0.322274881516588	93.8388625592417	LS	1.875	5.03065184543009	5.03065184543009	5.03065184543009	0	118.473488155734	825.083571205946	338.327058544039	0.0166666666666667	0
Chr2	3025816	3026101	286	LTR/Gypsy	0.125357542662116	285	0.235087719298246	90.8450704225352	LS	1.45238095238095	5.03065184543009	5.03065184543009	5.03065184543009	0	546.59733203372	829.75667973926	75.4707066623928	0.0307692307692308	0
Chr4	1455242	1455381	140	Unspecified	0.199687218045113	139	0.517985611510791	87.0967741935484	LS	-1	5.03065184543009	5.03065184543009	5.03065184543009	0	115.53522957012	837.890230393903	923.270464596132	0	0.0034965034965035
Chr5	3689754	3689965	212	Unspecified	0.136805806451613	211	0.52132701421801	89.5734597156398	LS	0.115384615384615	5.03065184543009	5.03065184543009	5.09975004453444	0	116.804847477484	840.982747527359	733.356976061939	0.00154798761609907	0.00153609831029186
Chr4	1131791	1132050	260	LTR/Gypsy	0.213160866425993	259	0.471042471042471	87.3517786561265	LS	0.150375939849624	5.35124425002798	5.03065184543009	5.4750656910829	0	0	841.177351888698	866.147159751888	0	0.00309597523219814
Chr4	1180884	1181023	140	Unspecified	0.199687218045113	139	0.517985611510791	87.0967741935484	LS	-1.16666666666667	5.03065184543009	5.03065184543009	5.03065184543009	0	119.344083292212	841.710398617584	799.592489587928	0.00192307692307692	0.00573613766730402
Chr4	1144043	1144910	868	LINE/I	0.290292271223815	867	0.519031141868512	79.2009400705053	LS	-0.185828877005348	5.37474612076129	5.55621282828329	6.31323917155827	0	155.380120431942	860.578912338241	524.796090849305	0.00349214267897231	0.0027378507871321
Chr4	1459665	1460169	505	Unspecified	0.205247058823529	504	0.498015873015873	82.9218106995885	LS	-0.0933333333333334	5.56972273049345	5.11924851457382	5.20482771781376	6.65531190258373	115.643765494607	867.459193185545	564.210356191204	0.00173110213502597	0.00461254612546125
Chr2	3450407	3450866	460	LTR/Gypsy	0.200051900826446	459	0.389978213507625	86.0262008733624	LS	1.21688675470188	5.03065184543009	5.03065184543009	5.10018468709118	7.30921809388562	530.594945801105	876.720266356	331.922194124284	0.0245971162001696	0.0343007915567282
Chr2	2892809	2893020	212	Unspecified	0.136805806451613	211	0.52132701421801	89.5734597156398	LS	0.185185185185185	5.03065184543009	5.03065184543009	5.09975004453444	15.9410566047601	117.639167816609	886.169880230322	761.70840554887	0.00314465408805031	0.00418410041841004
Chr2	3422833	3422999	167	Unspecified	0.204754424242424	166	0.487951807228916	87.5	LS	0.738095238095238	5.03065184543009	5.03065184543009	5.03065184543009	0	151.846301720729	890.353873999115	459.464984533651	0.00561797752808989	0
Chr2	3231036	3231233	198	Unspecified	0.16686018957346	197	0.568527918781726	90.7692307692308	LS	-0.471590909090909	5.03065184543009	5.03065184543009	5.03065184543009	34.1594070102002	269.962224016839	892.983812939499	963.948602555641	0.00763358778625954	0.00516795865633075
Chr2	3476800	3476940	141	Unspecified	0.238925890410959	140	0.514285714285714	86.2595419847328	LS	-0.628571428571429	5.03065184543009	5.03065184543009	5.10018468709118	0	305.037119671416	901.394801440792	862.372977487358	0.00481927710843374	0.00172117039586919
Chr2	2911519	2911716	198	Unspecified	0.16686018957346	197	0.568527918781726	90.7692307692308	LS	-0.471590909090909	5.03065184543009	5.03065184543009	5.03065184543009	0	278.901370507462	918.087775552256	909.270845687989	0.00675675675675676	0.00111358574610245
Chr2	2901553	2901720	168	Unspecified	0.186459817073171	167	0.497005988023952	88.2352941176471	LS	0.69047619047619	5.03065184543009	5.03065184543009	5.03065184543009	0	264.921837802848	986.615976419437	755.582675001091	0.00793650793650794	0.00854700854700855
Chr4	1136574	1136785	212	Unspecified	0.147589170506912	211	0.502369668246445	88.6255924170616	LS	0.342222222222222	5.03065184543009	5.03065184543009	5.09975004453444	3315.7397737901	93.4438779819874	1045.16164344445	744.697547856711	0	0.00403768506056528
Chr5	1043565	1044054	490	Unspecified	0.184853479166667	489	0.505112474437628	84.5665961945032	LS	0.1	5.8699282088452	5.11924851457382	5.36297071073068	0	90.1168546624443	1048.96496237034	614.087314911592	0.0041994750656168	0.00171379605826907
Chr4	1135516	1135848	333	LTR/Gypsy	0.258327298050139	332	0.484939759036145	83.7423312883436	LS	-0.290816326530612	5.31453192920079	5.737347519351	5.56543420271488	10.1136612900291	136.56639267005	1057.02092729303	713.496699776834	0.00280898876404494	0.00309597523219814
Chr4	1169436	1169912	477	LTR/Gypsy	0.173854798387097	476	0.487394957983193	90.174672489083	LS	0.0757142857142858	5.8519174944938	5.47358435469149	5.312094263902	0	165.61697847597	1059.9157267344	711.949159831807	0.00666666666666667	0.00664136622390892
Chr4	1171201	1171738	538	LTR/Gypsy	0.211538172043011	537	0.4487895716946	87.4509803921569	LS	0.0843373493975904	5.20485363606043	5.11186440223292	5.45255895827219	0	284.05805725168	1065.51333850788	496.150016021286	0.00407747196738022	0.00234741784037559
Chr2	3437759	3439101	1343	LTR/Gypsy	0.340504422700587	1342	0.3725782414307	77.9605263157895	LS	1.47950819672131	5.03065184543009	5.03065184543009	5.03065184543009	0	456.375091989768	1067.20857615813	339.498325653342	0.0285996055226824	0.0127388535031847
Chr5	655033	655152	120	LTR/Gypsy	0.259283203125	119	0.436974789915966	84.3478260869565	LS	-0.25	7.91506125400085	7.12538230827805	7.64496342471192	0	230.145144394196	1158.6116982125	901.47935114376	0.00317460317460317	0.0023094688221709
Chr2	3551278	3551610	333	LINE/I	0.357442691131499	332	0.460843373493976	73.2484076433121	LS	0.476190476190476	5.668833736886	5.14536808661724	5.28883445336202	0	96.3375328137559	1186.56040808635	371.737776354317	0.00176991150442478	0.00377833753148615
Chr2	2949489	2949598	110	LTR/Gypsy	0.348606315789474	109	0.458715596330275	76.6990291262136	LS	0.133333333333333	5.03065184543009	5.03065184543009	5.03065184543009	0	48.6686864489518	1213.82308114645	643.157428175741	0.0050251256281407	0
Chr4	1172646	1173082	437	LTR/Gypsy	0.158258904109589	436	0.488532110091743	87.1794871794872	LS	0.321009389671361	5.34662274500371	5.42407186188652	5.41448239485588	0	153.054627729117	1232.51799889805	571.19983453669	0.00356887937187723	0.00433275563258232
Chr5	701437	707354	5918	LTR/Copia	0.199785234899329	5215	0.460594439117929	82.9371980676328	LS	0.654792026068622	5.56874579958818	5.96264737724872	6.13565049494787	1.13171801453672	162.117072792026	1262.23369013953	419.865693071157	0.00421820669212791	0.00352537341126264
Chr5	688221	688360	140	Unspecified	0.285549271523179	139	0.517985611510791	82.8358208955224	LS	0.625	5.17029132765031	5.14536808661724	5.2740004301771	0	545.935700166502	1344.6992147355	920.394232619197	0.00168634064080944	0.00541516245487365
Chr5	3688701	3689029	329	LTR/Gypsy	0.249245714285714	328	0.481707317073171	84.5679012345679	LS	-0.0588235294117647	5.1295646765902	5.39354974145708	5.20296749021384	0	68.0468606864243	1374.65307200008	945.567859279711	0.00146305779078274	0.00215672178289001
Chr4	1155758	1155965	208	LTR/Copia	0.398875	207	0.458937198067633	70.5	LS	-0.954545454545454	5.03065184543009	5.03065184543009	5.09975004453444	0	50.1807233095017	1428.00113541887	531.79574532767	0	0
Chr2	2949796	2950008	213	Unspecified	0.115152844036697	212	0.5	91.5094339622642	LS	0.0290909090909091	5.03065184543009	5.03065184543009	5.03065184543009	0	2.49109864288473	1502.43052072936	650.873575519867	0.00189753320683112	0.00333333333333333
Chr4	1059778	1059946	169	LINE/I	0.228985082872928	168	0.458333333333333	86.0606060606061	LS	0.238095238095238	5.48811094747045	5.11924851457382	5.03065184543009	0	0	1620.48333512288	470.59977567528	0.00651465798045603	0.004149377593361
Chr5	718850	718958	109	LINE/I	0.215004745762712	108	0.472222222222222	87.037037037037	LS	-0.381818181818182	5.03065184543009	5.03065184543009	5.03065184543009	0	381.526113956829	1767.13127475968	856.902083745174	0.00779727095516569	0.00324675324675325
Chr2	3484270	3484446	177	Unspecified	0.300354550561798	176	0.477272727272727	79.7546012269939	LS	0.716577540106952	5.1295646765902	5.03065184543009	5.03065184543009	0	1.00118440694986	1980.20057089427	623.731448712474	0	0.00775193798449612
Chr4	1125652	1125756	105	Unspecified	0.318788990825688	104	0.432692307692308	81.0526315789474	LS	-0.541666666666667	5.03065184543009	5.03065184543009	5.03065184543009	0	1.7010414681187	2030.25251033268	647.403516051076	0.002710027100271	0
Chr5	711485	711671	187	Unspecified	0.302723015075377	186	0.510752688172043	80.8988764044944	LS	0.367647058823529	5.03065184543009	5.03065184543009	5.03065184543009	0	168.577806899937	2040.34152348873	733.765645315805	0.00636942675159236	0.00597014925373134
Chr4	1064465	1064607	143	DNA/hAT	0.271741315789474	142	0.302816901408451	82.6086956521739	LS	0.276923076923077	5.23174859430004	5.03065184543009	5.03065184543009	0	180.177690257821	2077.57545906568	298.393768500745	0	0.00735294117647059
Chr5	3681051	3681218	168	Unspecified	0.191390363636364	167	0.497005988023952	88.2352941176471	LS	0.738095238095238	5.03065184543009	5.03065184543009	5.03065184543009	0	264.921837802848	2098.14685114091	1083.16123979587	0	0
Chr1	9115	11385	2271	Unspecified	0.00044	2270	0.528193832599119	99.9559471365639	Core	-0.112627330386316	13.9794284769329	14.4723987937439	14.9737340511741	0	0	0	9169.74444771081	0.00650618087182824	0.00733929111082329
Chr1	16591	18861	2271	Unspecified	0.00044	2270	0.528193832599119	99.9559471365639	Core	-0.112627330386316	13.9794284769329	14.4723987937439	14.9737340511741	0	0	0	9137.90687947251	0.00677877721287968	0.00633757275274844
Chr1	24067	26337	2271	Unspecified	0.00044	2270	0.528193832599119	99.9559471365639	Core	-0.112627330386316	13.9794284769329	14.4723987937439	14.9737340511741	0	0	0	9063.56090968528	0.00627984562046183	0.0076010945576163
Chr1	31543	33813	2271	Unspecified	0.00044	2270	0.528193832599119	99.9559471365639	Core	-0.112627330386316	13.9794284769329	14.4723987937439	14.9737340511741	0	0	0	9139.65619640868	0.00703125	0.00751490023322104
Chr1	39018	41288	2271	Unspecified	0.00044	2270	0.528193832599119	99.9559471365639	Core	-0.112627330386316	13.9794284769329	14.4723987937439	14.9737340511741	0	0	0	8927.98884713208	0.00840501030186088	0.00756887677868604
Chr1	3568899	3569052	154	Unspecified	0.321305454545455	153	0.647058823529412	79.5918367346939	Core	-1.27083333333333	5.13159268805071	5.4062260482985	5.6695876275324	0	0	25.4342779102933	762.504235148503	0.00335195530726257	0.00234741784037559
Chr7	853510	854087	578	LTR/Gypsy	0.300693937823834	577	0.54419410745234	75.3899480069324	Core	-1.01862348178138	5.96448651940253	6.84764933518017	5.76828155189426	5.81184355381878	57.1857065775183	26.847293349754	758.696066165883	0.00391389432485323	0.00290275761973875
Chr7	2405353	2405475	123	Unspecified	0.192202109375	122	0.475409836065574	86.7768595041322	Core	0.274725274725275	5.34387034591997	5.43184284062494	5.61794136893229	0	0	27.5936117974932	685.589113047595	0	0
Chr3	2197602	2197779	178	Unspecified	0.254374603174603	177	0.559322033898305	84.7058823529412	Core	0.0362318840579712	5.23050551921081	5.4783872676919	5.09975004453444	0	1.99099171836621	30.9520448123197	884.04911945611	0.00172117039586919	0.00681818181818182
Chr7	853367	853495	129	Unspecified	0.0621019847328244	128	0.4921875	96.09375	Core	1.66666666666667	6.66860189916696	8.31854937890499	5.94993567102154	26.3592274566899	1.37958481272619	31.8247085090856	1184.50932958783	0.00671140939597315	0.0017825311942959
Chr2	975596	975764	169	Unspecified	0.155809545454545	168	0.547619047619048	89.2857142857143	Core	0.331521739130435	5.89921398252959	5.77336866856946	6.03156774904659	0	0	42.0904762369578	1010.12578112118	0.00169491525423729	0
Chr2	4024801	4024942	142	Unspecified	0.0721608391608392	141	0.560283687943262	94.3262411347518	Core	-0.561904761904762	5.1295646765902	5.22281708988933	5.44745049642087	0	1.25148050868733	43.9319345723247	810.850883326216	0.0015527950310559	0.00182149362477231
Chr5	1867826	1868060	235	Unspecified	0.113976066945607	234	0.52991452991453	91.4163090128755	Core	1.12903225806452	5.03065184543009	5.11924851457382	5.23354388456185	0	642.176006947027	44.4975817985778	725.69925090152	0.00512820512820513	0.0017636684303351
Chr1	3566797	3568362	1566	Unspecified	0.283911586570112	1565	0.598083067092652	77.8833107191316	Core	-1.11992124574906	5.78031109167213	6.56995336586353	7.43360422712951	0	81.3302294776089	48.5386080185276	595.887589574414	0.00324312234399463	0.00176084520569874
Chr5	2848165	2848318	154	Unspecified	0.239011585365854	153	0.477124183006536	83.6601307189542	Core	-1.06372549019608	5.03065184543009	5.24952708066976	5.10471848180467	0	0	52.0246593619635	793.840025634058	0	0.00412371134020619
Chr4	1874610	1874807	198	Unspecified	0.412325369127517	197	0.614213197969543	74.21875	Core	-0.264367816091954	5.40683693656421	5.03065184543009	5.312094263902	0	42.9079031549942	52.8976355054522	856.618190926547	0.00402684563758389	0.00613496932515337
Chr6	3259088	3259313	226	Unspecified	0.256532602739726	225	0.742222222222222	80.8612440191388	Core	-0.4	7.85807877721823	5.94218652031092	6.84336751382985	0	0	55.6994170470546	1050.77485535937	0.00169491525423729	0.00165289256198347
Chr2	2209130	2209882	753	Unspecified	0.310791293333333	752	0.615691489361702	76.4216366158114	Core	-0.574418604651163	6.02547535995189	6.1537825990406	6.29981865108653	0	27.5292383535482	60.3698488397325	748.915656673409	0.00314004605400879	0.00164744645799012
Chr8	3096004	3096436	433	Unspecified	0.28349	432	0.641203703703704	78.5888077858881	Core	-1.0982905982906	5.76630256652091	6.3465888091106	8.66006156432989	0	41.4643658098726	60.7504246058133	824.230653065524	0.00458715596330275	0.0050125313283208
Chr1	2589207	2589437	231	Unspecified	0.0755381974248927	230	0.565217391304348	93.9130434782609	Core	0.890476190476191	5.27123217027093	5.44534292458345	5.34801157379668	0	0	61.389602895825	1674.34380952511	0.0022883295194508	0.00296442687747036
Chr7	273243	273451	209	LTR/Gypsy	0.465675471698113	208	0.495192307692308	65.8653846153846	Core	-0.801282051282051	5.03065184543009	5.1977907162999	5.32430477172126	0	250.537933719821	63.6694703946735	747.820314003098	0.00305343511450382	0.000743494423791822
Chr3	489568	489712	145	Unspecified	0.02831	144	0.576388888888889	97.2222222222222	Core	-0.891666666666667	5.31278360448795	5.69446963938523	5.65495190290429	0	324.684803302797	63.9009957415633	871.558629542287	0.00142045454545455	0.00672645739910314
Chr4	1037879	1038439	561	Unspecified	0.0344384341637011	560	0.648214285714286	96.9642857142857	Core	-0.2375	6.15580024149971	6.02811149896323	7.0031717748925	0	0.940289469854524	64.4439827357894	947.211622715414	0.002997002997003	0.00262582056892779
Chr3	1892250	1892510	261	DNA/Mite	0.0804268199233717	260	0.307692307692308	92.6923076923077	Core	0.512544802867384	5.13159268805071	5.38143945838056	5.16928288619553	0	0	65.8130911739845	384.659935201059	0.00413223140495868	0
Chr4	687127	687353	227	Unspecified	0.0680969298245614	226	0.561946902654867	94.2477876106195	Core	0.857142857142857	5.23377660576055	5.56116824486165	5.23354388456185	0	0	66.3860344648463	1458.90155822081	0.00143266475644699	0.00668449197860963
Chr6	1256615	1257060	446	Unspecified	0.292357924107143	445	0.568539325842697	77.2413793103448	Core	-0.722222222222222	9.99446532350951	5.8979093125736	7.43718272668907	0	0.789221942415434	68.8662758160766	711.595338293592	0.00506970849176172	0.00327653997378768
Chr1	6065336	6065460	125	Unspecified	0.08704921875	124	0.491935483870968	95.9016393442623	Core	0.729166666666667	6.09639450937211	5.77393869151846	5.76249563406834	0	142.444935948151	70.0053591558996	1445.69240440674	0	0.00244498777506112
Chr2	4167060	4167297	238	Unspecified	0.225023170731707	237	0.451476793248945	84.4155844155844	Core	-0.493939393939394	6.12824503682232	6.35236479991863	5.50183205260051	0	13.3632664486952	70.7378607520483	610.516799375345	0	0.0053475935828877
Chr1	3568474	3568841	368	Unspecified	0.30804702970297	367	0.656675749318801	82.5214899713467	Core	-1.210407239819	5.1295646765902	5.57558497797721	6.0408732128162	0	0	72.9798257376324	726.602209255217	0.000872219799389446	0.0027114967462039
Chr3	3090030	3090289	260	DNA/Mite	0.0842712643678161	259	0.32046332046332	92.6640926640927	Core	0.144179894179894	5.13159268805071	5.14536808661724	5.2433495225701	0	69.9470888964004	74.9226791155926	390.766214168703	0	0.0119047619047619
Chr7	854101	854229	129	Unspecified	0.0701923664122137	128	0.4921875	95.3125	Core	1.61111111111111	6.93884992351104	8.77841089778561	6.14732920423724	0	1.37958481272619	76.1025638260743	971.985228236976	0.0106761565836299	0.00422832980972516
Chr7	2547349	2547472	124	Unspecified	0.106061181102362	123	0.504065040650406	92.6829268292683	Core	0.0588235294117647	5.83246400585782	5.60157835829949	5.79394811935347	0	0	76.3407387650233	884.936422018294	0	0.014218009478673
Chr7	2204903	2205143	241	DNA/Mite	0.2332576	240	0.483333333333333	83.1223628691983	Core	-0.666666666666667	5.23174859430004	5.79976761735693	5.45615817772893	0	0	76.4673003434606	807.126051167682	0	0.00347826086956522
Chr3	858059	858186	128	Unspecified	0.0860362595419847	127	0.519685039370079	94.488188976378	Core	0.496240601503759	5.03065184543009	5.42407186188652	5.51330839699757	0	0	76.7065524278686	863.143519935444	0	0.00857142857142857
Chr5	3406714	3407358	645	Unspecified	0.273864474522293	644	0.762422360248447	78.6535303776683	Core	-0.502164502164502	5.03065184543009	5.03065184543009	5.03065184543009	0	1.36242046046832	76.7954812741726	798.778377270972	0.00309745055992376	0.00263852242744063
Chr2	2376029	2376347	319	Unspecified	0.428822608695652	318	0.518867924528302	68.8311688311688	Core	-0.466266866566717	6.98124858737788	6.88022541050691	5.84849236866437	10.5603214100934	37.0311898154169	77.6084648596273	724.973777353501	0.00248550124275062	0.000763358778625954
Chr2	307872	308133	262	DNA/Mite	0.244027	261	0.494252873563218	83.1275720164609	Core	-0.25	5.13283576313994	5.67584799132622	5.23845559855887	0	0	78.4016063136872	717.509253938475	0.00425531914893617	0.00195950359242325
Chr3	658965	659078	114	Unspecified	0.209864117647059	113	0.548672566371681	84.9557522123894	Core	-0.444444444444444	5.03065184543009	5.03065184543009	5.03065184543009	0	114.197596417719	78.4498831648656	1289.99004165534	0.00557103064066852	0.0046875
Chr8	274892	275210	319	Unspecified	0.280666666666667	318	0.625786163522013	78.525641025641	Core	-0.891666666666667	6.93327701016655	6.09982914331385	8.49043058552408	0	1.10540865120648	78.7171572147648	796.34425284426	0.00304878048780488	0.00360576923076923
Chr3	419769	419915	147	Unspecified	0.311199225806452	146	0.410958904109589	78.8732394366197	Core	-0.620300751879699	5.17029132765031	5.34793577399623	5.10471848180467	0	134.124186931042	79.986418807543	1256.4571440208	0	0
Chr1	1720663	1720924	262	DNA/Mite	0.109748091603053	261	0.310344827586207	90.3846153846154	Core	0.793756967670011	5.03065184543009	5.23698308633982	5.17425132346575	0	169.816278255727	81.1051099796764	570.954172282957	0	0
Chr5	3631324	3635282	3959	LINE/I	0.334944966485796	3182	0.576367064739158	75.7637474541752	Core	-0.67550554724998	9.44951977845721	7.89891759165317	11.4866927746063	996.587966359754	47.0673058637474	81.1358549038537	624.01804390567	0.00300579298283965	0.00329139847864248
Chr1	1928298	1928555	258	DNA/Mite	0.132417423076923	257	0.33852140077821	88.715953307393	Core	0.389527458492976	5.81932205833538	5.43443770194672	5.2023543974499	0	0	83.0588138008014	541.113611223215	0.00917431192660551	0
Chr2	2208190	2208986	797	Unspecified	0.30980793931732	796	0.631909547738693	76.6490765171504	Core	-0.918875502008032	6.19558381174569	6.36733060992536	6.84655030836915	0	40.9918898694567	83.3325249497682	786.850239244827	0.00255905511811024	0.00242971190558834
Chr5	2145680	2145914	235	Unspecified	0.0650989830508475	234	0.551282051282051	95.2586206896552	Core	0.846743295019157	5.13159268805071	5.30345772725707	5.25693637281563	0	383.500894078435	83.71578948546	1563.83078011173	0.0078740157480315	0.00911161731207289
Chr2	378369	378731	363	Unspecified	0.544453228571429	362	0.55524861878453	61.8768328445748	Core	-1.24545454545455	5.32963420465738	6.13322961553402	5.37499794034605	0	140.748223414697	84.6997962945651	1059.91936940614	0.00376411543287327	0.00618429189857761
Chr4	1269209	1269377	169	DNA/Tc1-Mariner	0.264785628742515	168	0.505952380952381	80	Core	0.0416666666666666	5.47529361769265	5.88591238078225	5.75981637527556	0	1.04914533662411	85.2332143798396	1010.12578112118	0	0
Chr1	3370436	3370753	318	LTR/Gypsy	0.519299191919192	317	0.570977917981073	63.8297872340426	Core	-0.665546218487395	5.03065184543009	5.11924851457382	5.10471848180467	7744.0240487238	36.5939237350346	86.1955678317764	774.998885785148	0.00269179004037685	0.0050761421319797
Chr1	5558982	5559179	198	Unspecified	0.208363762376238	197	0.456852791878173	83.6734693877551	Core	0.262857142857143	5.99961559454866	6.08217122390158	5.88372130261143	0	0.893914649062379	86.9672990513367	552.852874995147	0	0.005249343832021
Chr1	5376178	5377075	898	LTR/Copia	0.422969866666667	897	0.53288740245262	67.7814938684504	Core	-1.08661257606491	9.32995962956181	10.1737140782113	8.72290757184515	0	25.8117854916762	87.0793703130008	576.774393624745	0.00279242941358982	0.00193723363037582
Chr5	3871254	3871510	257	DNA/Mite	0.113993846153846	256	0.30859375	90.625	Core	0.307142857142857	5.13283576313994	5.03065184543009	5.03065184543009	0	94.8180526581931	88.8975617228218	675.542296323884	0.00340136054421769	0
Chr1	2642274	2642500	227	DNA/Mite	0.130949367088608	226	0.451327433628319	92	Core	-0.357142857142857	5.3058960939436	5.3769349089031	5.85245943696249	14.8783194977761	200.904337661273	89.0353873999115	883.808561872584	0	0.00181818181818182
Chr1	538678	538842	165	LTR/Copia	0.271245325443787	164	0.457317073170732	79.1411042944785	Core	-0.424242424242424	5.03065184543009	5.03065184543009	5.36297071073068	0	426.731820078784	89.4809955706246	847.412051903841	0.00900900900900901	0
Chr5	3614251	3616097	1847	DNA/Mutator	0	1846	0.540086673889491	100	Core	-0.42200217037439	9.98402454158371	7.84992121076258	10.4950973530915	0	121.837901880986	91.1498349825795	536.971464493932	0.00312138728323699	0.00268647281921618
Chr5	3406102	3406393	292	Unspecified	0.210485254237288	291	0.701030927835051	84.6975088967972	Core	-1.29166666666667	5.03065184543009	5.03065184543009	5.03065184543009	0	148.019936027502	92.1055731723222	960.820168957084	0.00220385674931129	0.0018001800180018
Chr7	437094	437301	208	Unspecified	0.329391787439614	207	0.444444444444444	77.3684210526316	Core	-0.447204968944099	5.03065184543009	5.23020120223024	5.03065184543009	0	292.579132516417	92.9821527841436	672.451866374481	0	0.00268096514745308
Chr5	30481	30631	151	LTR/Copia	0.124092024539877	150	0.573333333333333	95.3333333333333	Core	0.0615384615384615	5.37568323722612	5.48317668247545	5.47798066076158	0	305.730808833684	93.1710827171451	1118.8349354574	0.0144927536231884	0.00611620795107034
Chr4	2557818	2557933	116	Unspecified	0.302244628099174	115	0.617391304347826	78.0701754385965	Core	-0.25	6.1400322800121	5.41614820320467	5.66166293404887	0	0	94.02975469866	908.737924081092	0.00217864923747277	0.00391134289439374
Chr3	2092523	2092664	142	Unspecified	0.0571832867132867	141	0.567375886524823	95.7446808510638	Core	-0.825	5.27205695342783	5.63335964530577	5.26872180881972	0	0	94.1398597978387	680.434307686335	0.00464576074332172	0.00676818950930626
Chr7	2315778	2316060	283	LTR/Gypsy	0.439167045454545	282	0.528368794326241	69.5473251028807	Core	0.411411411411411	5.03065184543009	5.15577052953699	5.03065184543009	0	0	94.4302081198724	651.174825297688	0.00322372662798195	0.00484496124031008
Chr5	2789461	2789633	173	Unspecified	0.281983625730994	172	0.575581395348837	80	Core	-0.375	5.34947553962113	6.10622051858613	5.27392591691811	0	126.026282804654	94.5435784948275	1773.37362451585	0.00429184549356223	0
Chr1	219603	220043	441	Unspecified	0.296978502304147	440	0.618181818181818	76.9596199524941	Core	-0.4375	7.8548913110363	7.16367521943282	6.45806300170773	0	0.399105401403705	95.2692521932873	708.8503190172	0.00319715808170515	0.00198019801980198
Chr4	1873220	1874414	1195	LTR/Gypsy	0.446001727541955	1126	0.571047957371226	67.5897435897436	Core	0.182231404958678	5.87513657700185	5.71142037750775	5.96210630180348	0	74.0188304216078	95.7443670478158	504.384525926752	0.00232983857547013	0.00169587337478802
Chr6	396803	396947	145	Unspecified	0.0422001388888889	144	0.576388888888889	97.1830985915493	Core	-0.982142857142857	5.37557985971267	5.61485195325703	5.26872180881972	0	0	95.8514936123449	949.277233450517	0.00524475524475524	0
Chr4	2293762	2293892	131	Unspecified	0.085318045112782	130	0.5	93.8461538461538	Core	0.363095238095238	5.1295646765902	5.87055986740531	5.23354388456185	0	84.2081458558607	96.7183675855831	861.531810765644	0.005	0.00308641975308642
Chr2	348926	349028	103	Unspecified	0.1722675	102	0.411764705882353	88.7755102040816	Core	-0.25	5.1295646765902	5.63197863103949	6.08237490338638	0	1.7347254575864	97.4332014277301	723.101805528052	0	0.00833333333333333
Chr3	3255620	3256402	783	LTR/Copia	0.396169350649351	681	0.547723935389134	73.5507246376812	Core	-0.932835820895522	6.55925884580817	7.32321038762018	6.92283297236631	2910.41646769877	61.4683640374469	102.826602302445	819.251037978298	0.00452693526482571	0.00369458128078818
Chr5	3583074	3588235	5162	LINE/I	0.178243060361399	5160	0.559108527131783	85.4984301412873	Core	-0.52432114679094	10.6643144140481	8.85098933794033	15.8937280455095	0	51.8491285168949	102.848404967768	540.303521323025	0.00285986653956149	0.00297229219143577
Chr4	1037301	1037850	550	Unspecified	0.0593095306859206	549	0.60655737704918	95.2554744525548	Core	-0.79025641025641	5.7970026066558	5.74849554362354	5.75039044815178	0	5.75498336111692	104.859435074089	1064.00638472302	0.00249143568981626	0.00289995166747221
Chr1	2608121	2608252	132	Unspecified	0.0914422222222222	131	0.49618320610687	93.8931297709924	Core	0.105263157894737	5.61795448426852	5.62740443610811	5.65100931742114	0	0	105.436642973579	793.840025634058	0	0.00420168067226891
Chr3	1684293	1684518	226	Unspecified	0.234532838983051	225	0.502222222222222	82.6666666666667	Core	-0.204761904761905	6.01085156204531	6.62842530366228	6.49164748111022	0	2.34652595378875	106.691841104217	932.053244382844	0.00494233937397035	0
Chr2	380085	380334	250	DNA/Mite	0.196936186770428	249	0.44578313253012	86.0655737704918	Core	-0.0761494252873564	5.17029132765031	5.61879281319533	5.21253970151793	0	0	106.995518071307	779.435670330214	0	0.00291970802919708
Chr7	2100308	2100697	390	DNA/Mite	0.142340628930818	315	0.476190476190476	88.1789137380192	Core	0.583979328165375	6.15215884306041	6.59302910742348	5.55159522284207	0	149.016493560192	108.244663533872	457.276406518587	0.00120627261761158	0.00280898876404494
Chr1	2943439	2944188	750	LTR/Copia	0.19948978388998	484	0.477272727272727	89.7379912663755	Core	0.589285714285714	5.47459606838622	5.1977907162999	5.29787602046592	8.95086066042678	2046.73948648046	108.537720708096	282.832041218551	0.0082256169212691	0.00804289544235925
Chr4	1272038	1274053	2016	LINE/I	0.329980449101796	1670	0.58562874251497	78.5571142284569	Core	-0.530628109452736	6.83851109543862	6.99937672669483	6.80621678443267	1301.48358367463	63.4191165425169	108.542853243241	630.263257690595	0.0017611835153223	0.00202240199128811
Chr2	2293579	2293699	121	Unspecified	0.246323553719008	120	0.558333333333333	85.3211009174312	Core	-1.2	5.03065184543009	5.11924851457382	5.09975004453444	0	1.47233001022039	109.276072549648	1484.28072019813	0.00302114803625378	0.00151515151515152
Chr5	3618296	3618546	251	LTR/Copia	0.10984126984127	250	0.584	90.4	Core	-0.233333333333333	6.24712240091663	5.73890367946127	6.41782806420654	0	90.0663884163734	109.388752750367	782.681631699442	0.00326370757180157	0.0028109627547435
Chr8	2073694	2073958	265	DNA/Mite	0.234141333333333	264	0.446969696969697	82.5581395348837	Core	-0.234472049689441	5.03065184543009	5.14536808661724	5.03065184543009	0	0.666187343027476	109.579274066331	633.864659251529	0	0.00549450549450549
Chr8	3082591	3082734	144	Unspecified	0.383349866666667	143	0.594405594405594	74.6268656716418	Core	-1.46666666666667	5.03065184543009	5.03065184543009	5.10018468709118	0	0	110.139216251744	1243.86905425055	0.00224466891133558	0.00130718954248366
Chr2	606965	607117	153	LTR/Copia	0.202357108433735	152	0.447368421052632	88.1578947368421	Core	1.97222222222222	5.03065184543009	5.03065184543009	5.03065184543009	22.1696813708584	3035.37895034204	110.55718634095	281.261201135246	0	0
Chr4	3303483	3303679	197	DNA/Mite	0.18055472361809	196	0.505102040816326	88.2352941176471	Core	0.747619047619048	5.03065184543009	5.36367102650476	5.2433495225701	0	0	110.843650305558	1327.13768388053	0.00190839694656489	0
Chr8	2469362	2469491	130	Unspecified	0.0790089312977099	129	0.565891472868217	93.7984496124031	Core	0.3	5.32839112956815	5.27048677072414	5.4867709916311	0	0	111.202709386197	781.436275233526	0.00204918032786885	0
Chr2	1394947	1400474	5528	LTR/Copia	0.000903832248734635	5527	0.534829021168808	100	Core	-0.703106978085352	14.4835303935723	14.0039950596061	17.1451216507257	363.476860694855	54.7562355031529	111.268794114053	574.549978741117	0.00274397949236379	0.0024006721882127
Chr1	396076	396181	106	Unspecified	0.254582608695652	105	0.561904761904762	87	Core	-1.05454545454545	5.1295646765902	5.2648890227927	5.3246190855429	0	198.792865418411	111.519526222055	1805.22275060053	0.00235294117647059	0.0016366612111293
Chr1	1750867	1751063	197	Unspecified	0.35202	196	0.535714285714286	77.3480662983425	Core	-1.09545454545455	8.65008014008781	8.57129655692475	7.29592601503467	0	0	111.744818194221	753.130280729747	0	0.00189214758751183
Chr1	3314870	3315187	318	DNA/Mite	0.126798611111111	317	0.454258675078864	90.4761904761905	Core	0.428571428571429	5.48811094747045	5.52455947091773	5.50447310204265	0	0	112.332288400121	626.781918973726	0.00133868808567604	0.00148588410104012
Chr6	3180145	3185672	5528	LTR/Copia	0.000903832248734635	5527	0.534829021168808	100	Core	-0.703106978085352	14.4834163269559	14.0039624460494	17.1451562785069	400.430341532165	53.4562901322037	112.413600226687	588.987351628599	0.00312290876645104	0.00261845386533666
Chr6	3259496	3259626	131	Unspecified	0.247361439393939	130	0.607692307692308	81.1023622047244	Core	-0.450980392156863	7.90139791579289	5.81763200095322	6.70597768848655	0	4.07458770270294	113.065133938076	1178.45244115443	0.00284090909090909	0.00327868852459016
Chr4	1240541	1242099	1559	LINE/I	0.256126896551724	1557	0.564547206165703	80.2248677248677	Core	-0.523479278074866	8.71893770169793	9.40669965503737	8.40716444477285	2.15004617019885	0.562643773976321	113.201619463177	501.439733597364	0.00324566312255176	0.00296198782293895
Chr6	1027014	1027332	319	DNA/Mite	0.104194984520124	318	0.446540880503145	91.5094339622642	Core	0.276785714285714	5.03065184543009	5.19040660395899	5.16928288619553	0	269.167006568777	114.749658756735	553.434213454658	0.0282861896838602	0.037344398340249
Chr2	500498	500822	325	LTR/Copia	0.190582804878049	324	0.287037037037037	83.9506172839506	Core	1.50238095238095	5.03065184543009	5.03065184543009	5.09975004453444	0	263.624562882619	116.426427225727	170.810779509495	0.03125	0.0952380952380952
Chr1	1751131	1751242	112	Unspecified	0.36454	111	0.540540540540541	78.125	Core	-0.785714285714286	8.51076605275613	8.25273351311928	7.18412873403866	0	218.212692332936	116.619317228353	1122.20112714633	0	0
Chr6	2658425	2664298	5874	LTR/Copia	0.00365665896843726	5177	0.533127293799498	100	Core	-0.797188626658825	5.1295646765902	5.14160453308651	5.19799905294362	195.543989652736	50.097583169626	117.939887022842	671.69519198958	0.00347083166466426	0.00320650686270676
Chr2	367767	367908	142	Unspecified	0.172520540540541	141	0.439716312056738	87.9432624113475	Core	0.166666666666667	5.03065184543009	5.03065184543009	5.13529487615267	0	1.25148050868733	117.988624279958	652.082878199404	0.0164835164835165	0.0131233595800525
Chr8	246236	252109	5874	LTR/Copia	0.00365665896843726	5177	0.533127293799498	100	Core	-0.797188626658825	5.03065184543009	5.03065184543009	5.10018468709118	197.254286938329	55.1401630121911	118.538414741811	656.689019842887	0.0027478715257444	0.00302873311282031
Chr2	1133583	1133789	207	Unspecified	0.19675119266055	206	0.470873786407767	86.4077669902913	Core	-0.440476190476191	5.67763222013959	5.93397948774946	5.69714682416348	0	0.854669615688909	120.009187124399	915.820322255876	0	0.00395256916996047
Chr5	1906605	1907036	432	Unspecified	0.3458133640553	431	0.568445475638051	73.1764705882353	Core	-0.508021390374332	5.27205695342783	5.74864866052852	5.24788322014896	0	1133.55029889196	120.148732690823	669.225603005456	0.00313643491897543	0.00424328147100424
Chr5	3576422	3582285	5864	LTR/Copia	0.101809277573884	5161	0.534392559581476	91.1552698227158	Core	-0.682600755217304	10.9327998150894	9.54244695663272	10.7331283814922	53.1096614621229	61.9890618393813	120.958960081426	587.39015885154	0.00412713472485769	0.00315202112706053
Chr2	2448133	2448388	256	DNA/Mite	0.190633858267717	255	0.458823529411765	86.3636363636364	Core	-0.151515151515152	5.03065184543009	5.336200348951	5.21966174099868	0	92.4321824526548	121.072260632391	950.107747215565	0.00403225806451613	0.00392156862745098
Chr1	7813185	7819058	5874	LTR/Copia	0.00365665896843726	5177	0.533127293799498	100	Core	-0.797188626658825	5.03065184543009	5.336200348951	5.15012889933759	206.375872461489	51.3806064431781	121.291642249068	663.921724436113	0.00349948405042846	0.0037436948297604
Chr5	1707624	1707954	331	Unspecified	0.43386253164557	330	0.551515151515152	69.2567567567568	Core	-1.08866995073892	5.34561867063282	5.03065184543009	6.03470008612577	0	93.7279019272214	122.315051879178	459.655090830663	0.0041631973355537	0.00233644859813084
Chr5	1147258	1153131	5874	LTR/Copia	0.00365665896843726	5177	0.533127293799498	100	Core	-0.797188626658825	5.03065184543009	5.03065184543009	5.37641342672313	200.104782414316	49.6798546619579	122.398918529161	663.178175365782	0.00316950329975686	0.00321443786065606
Chr3	3602323	3608196	5874	LTR/Copia	0.00365665896843726	5177	0.533127293799498	100	Core	-0.797188626658825	5.13159268805071	5.22281708988933	5.27313781658891	217.207755270241	49.5306659092193	122.428844915109	670.208093848917	0.00295570848773602	0.0044668867741309
Chr6	344417	349903	5487	LINE/I	0.00995821176470588	5486	0.564710171345242	99.7083485235144	Core	-0.729888446606713	11.6859667089051	10.9422052681902	12.2176163848957	400.982238789197	39.2579282269357	123.057473613345	658.373432380917	0.00257035952497153	0.00297860817763336
Chr6	622309	622442	134	Unspecified	0.327842335766423	133	0.601503759398496	80	Core	-0.252631578947368	5.27583328960119	5.43277330023106	6.33370452784325	25.3607718712092	0	123.808179249279	1308.03186041975	0.00219298245614035	0.00647948164146868
Chr1	7861883	7862149	267	Unspecified	0.2926555859375	266	0.582706766917293	78.8381742738589	Core	-0.679738562091503	5.99597308284068	5.75982334177544	6.76388238291558	0	247.934817758811	124.004102113581	835.778743969442	0.00333333333333333	0
Chr2	343556	343799	244	Unspecified	0.19250408	243	0.460905349794239	85.1239669421488	Core	-0.313131313131313	5.13283576313994	5.59595824557624	5.20482771781376	0	60.0917500452347	124.171253088719	674.107955652061	0	0
Chr6	3185677	3185903	227	LTR/Copia	0.0921684581497797	226	0.433628318584071	92.4107142857143	Core	-0.365384615384615	5.03065184543009	5.11924851457382	5.21997605482032	0	152.625000703913	124.180935057771	735.625090420893	0.00274348422496571	0.0065359477124183
Chr8	2337087	2342960	5874	LTR/Copia	0.00384596420323326	5177	0.532934131736527	99.9806837937029	Core	-0.791671993658749	5.33280134085501	5.45595786260369	5.44820397124648	213.787160699056	48.6355333927876	124.613471089346	660.474360564576	0.00363270308123249	0.00352480923422551
Chr4	3383030	3388903	5874	LTR/Copia	0.00365665896843726	5177	0.533127293799498	100	Core	-0.797188626658825	5.03065184543009	5.03065184543009	5.21997605482032	198.394485128724	54.0958417430208	124.763103019088	660.136383714425	0.00333496376006047	0.00335911256933052
Chr6	490991	491120	130	Unspecified	0.0790089312977099	129	0.503875968992248	93.7984496124031	Core	1.2	5.13283576313994	5.52038581401975	5.20296749021384	0	260.073293211586	124.931438940048	1724.12130567397	0.00411522633744856	0.00245098039215686
Chr5	1318561	1324434	5874	LTR/Copia	0.00365665896843726	5177	0.533127293799498	100	Core	-0.797188626658825	5.17029132765031	5.31552528806589	5.2940426911949	192.123395081552	53.7079509859004	125.062366878573	633.976975512758	0.00272503516174402	0.00342332529370575
Chr5	3407938	3408099	162	Unspecified	0.344664331210191	161	0.739130434782609	77.3049645390071	Core	-0.716666666666667	5.03065184543009	5.03065184543009	5.03065184543009	0	0	125.206013531125	1322.23979269673	0.00245398773006135	0.00170357751277683
Chr2	2375717	2376039	323	Unspecified	0.385785015479876	322	0.577639751552795	71.1538461538462	Core	-0.230263157894737	5.03065184543009	5.336200348951	5.09975004453444	0	54.0358873844436	125.910840518812	785.184449030571	0.0136736554238833	0.010840108401084
Chr7	2812139	2817661	5523	LINE/I	0.00917840287769784	5522	0.563382832307135	99.7645780514306	Core	-0.737005248459168	11.7454669510515	11.022126412091	12.2681074266698	409.281792016798	47.4751091721562	126.074546524889	639.414344139586	0.00336787564766839	0.00325980173260695
Chr3	2061105	2061936	832	DNA/Mite	0.164072673147023	831	0.522262334536703	85.5921855921856	Core	0.457446808510638	5.64298367850317	5.60505627840661	5.27313781658891	0	1.26655858710525	126.185219301713	830.662725618288	0.00234009360374415	0.00458265139116203
Chr8	870209	876082	5874	LTR/Copia	0.00365665896843726	5177	0.533127293799498	100	Core	-0.797188626658825	5.03065184543009	5.32755153406094	5.35302093846935	205.805773366291	55.8264312747887	126.977655579274	640.330940295592	0.0033144776383242	0.00365758754863813
Chr6	636580	642102	5523	LINE/I	0.00917840287769784	5522	0.563382832307135	99.7645780514306	Core	-0.737005248459168	11.7537088099548	11.0789169360846	12.2678296452132	405.643731643315	46.808680500622	127.25221838084	646.891192778052	0.00299313530923642	0.0033462964637786
Chr5	1972611	1972808	198	LTR/Gypsy	0.178559497487437	197	0.467005076142132	84.7715736040609	Core	0.166666666666667	5.03065184543009	5.03065184543009	5.03065184543009	17.0797035051001	2028.29233872254	127.31295325041	281.489192763097	0.00526315789473684	0.0177514792899408
Chr8	1426659	1428213	1555	LTR/Gypsy	0.0888433673469388	1554	0.204633204633205	92.4613402061856	Core	1.16025142173002	5.03065184543009	5.03065184543009	5.03065184543009	2.15558395814528	906.948649908077	127.411096789279	45.7493124882474	0.00772797527047913	0
Chr4	1391197	1393876	2680	Unspecified	0.0153812168719672	2679	0.609555804404629	98.9497374343586	Core	-0.758356510745891	8.15870731299564	8.46766468818863	7.50091530786971	0	62.8731096485413	127.825852945315	1000.74829221082	0.00507826502569005	0.00539250353606789
Chr8	2769752	2775625	5874	LTR/Copia	0.00365665896843726	5177	0.533127293799498	100	Core	-0.797188626658825	5.03065184543009	5.03065184543009	5.10471848180467	216.067557079846	51.4104441937258	127.905373543676	673.114694760213	0.0037295209341562	0.00364877589453861
Chr7	1442883	1443083	201	Unspecified	0.238521333333333	200	0.445	83.6734693877551	Core	-1.57142857142857	5.49790933800131	5.64199222663726	5.312094263902	0	0.880438548825258	128.04282438165	478.697502894909	0	0.00378787878787879
Chr8	2683822	2689695	5874	LTR/Copia	0.00365665896843726	5177	0.533127293799498	100	Core	-0.797188626658825	5.27123217027093	5.10919404715617	5.27035490962347	216.067557079846	52.1862257079666	128.174711017212	646.549714338365	0.00253565768621236	0.00356054911579697
Chr4	700642	701196	555	DNA/Mite	0.195738856088561	534	0.50749063670412	83.7078651685393	Core	0.153846153846154	5.430575047278	5.28564657311357	5.81286543699958	6.05356579927598	53.5443559413061	128.379758171567	930.213990254737	0.00235404896421846	0.00500625782227785
Chr2	627984	629519	1536	LTR/Gypsy	0.133592062459336	1533	0.159165035877365	89.0728476821192	Core	1.07293720078851	5.03065184543009	5.03065184543009	5.03065184543009	12524.1212578167	523.109062692514	128.530979374572	24.0635992125057	0.0101010101010101	0
Chr2	1897645	1897886	242	Unspecified	0.224891803278689	241	0.423236514522822	83.6206896551724	Core	-0.558095238095238	5.77964395313145	5.47419037882482	5.43196497288681	0	0	128.867008078819	802.109192567746	0.00346020761245675	0.00576368876080692
Chr6	1522320	1522457	138	Unspecified	0.0732145714285714	137	0.598540145985402	94.8905109489051	Core	-0.932692307692308	5.17314412226773	5.85543391395636	5.32823389296419	0	0	129.211572271543	1001.05562056059	0.00240384615384615	0.0018348623853211
Chr5	3485704	3490868	5165	LTR/Copia	0.00385802469135802	5164	0.53272656855151	100	Core	-0.795532997519753	5.27123217027093	5.14536808661724	5.32258040773578	224.990275961431	52.5316397138715	129.711100255766	652.846164796089	0.00244701769718156	0.00262903537599072
Chr1	8832541	8838414	5874	LTR/Copia	0.00365665896843726	5177	0.533127293799498	100	Core	-0.797188626658825	5.27247524536016	5.34491744341738	5.72104602725903	222.338647127018	47.6508876247128	129.730883086531	654.525968001923	0.00312939362329357	0.00318772136953955
Chr3	2407715	2407912	198	LTR/Gypsy	0.0895333165829146	197	0.314720812182741	92.3857868020305	Core	1.77272727272727	5.03065184543009	5.03065184543009	5.03065184543009	0	884.975502571755	130.002663530349	109.355513735304	0.0108695652173913	0
Chr2	1489343	1495216	5874	LTR/Copia	0.00365665896843726	5177	0.533127293799498	100	Core	-0.797188626658825	5.03065184543009	5.03065184543009	5.17425132346575	247.423007315707	58.273126819702	130.808232980675	642.223610656436	0.00283461776951014	0.00310778914240755
Chr7	2843811	2843950	140	Unspecified	0.209692657342657	139	0.503597122302158	83.4532374100719	Core	-0.283333333333333	5.51418316533565	5.61446593762497	5.57822445955959	0	1.26961790736396	131.159109013027	894.508144826782	0.00436681222707424	0
Chr1	9221495	9221746	252	DNA/Mite	0.169886692015209	251	0.434262948207171	88.0478087649402	Core	0.0411764705882354	5.37108211789586	5.11186440223292	6.38958214714469	13.3904875479985	0	133.553081099867	677.939381891485	0	0.0113895216400911
Chr7	2385220	2385463	244	Unspecified	0.15768572	243	0.440329218106996	88.3817427385892	Core	0.133333333333333	5.17489244698057	5.59532970456823	5.35613917955359	0	1.44799397699361	133.611172914178	474.007783901328	0.0022271714922049	0.0016750418760469
Chr4	2536310	2537214	905	LTR/Gypsy	0.389286548956661	618	0.503236245954693	71.3087248322148	Core	-0.10672188595094	5.96169240301989	5.43942591724884	5.2433495225701	0	52.7756121492952	134.08240496271	585.050428637282	0.00201748486886348	0.00386507378777231
Chr7	74542	74708	167	Unspecified	0.235808474576271	166	0.578313253012048	85.1851851851852	Core	-1.08333333333333	6.32575491909756	6.15447414991268	6.26968879573113	0	0	135.257107652976	853.979421515426	0.00239808153477218	0.00151285930408472
Chr3	103190	103339	150	LTR/Copia	0.164814074074074	149	0.543624161073825	91.8918918918919	Core	-0.166666666666667	5.98156055526058	5.92216293710764	6.85842796457841	26170.2602922875	121.934790103185	135.357852466082	1139.80409085971	0.00925925925925926	0.00392156862745098
Chr5	3461462	3466984	5523	LINE/I	0.00917840287769784	5522	0.563382832307135	99.7645780514306	Core	-0.737005248459168	11.7450775553883	11.019606773571	12.2679011297728	403.824701456574	48.4588848301354	135.495921372495	655.015076394847	0.00317846125081799	0.00314221763085399
Chr1	2954602	2956861	2260	LTR/Gypsy	0.0918904401408451	2259	0.170429393536963	91.85119574845	Core	1.13987363987364	5.03065184543009	5.03065184543009	5.03065184543009	26.6860912161174	1001.81624387631	135.725941353648	22.5003373076084	0.00374531835205993	0
Chr3	2495465	2498969	3505	LTR/Gypsy	0.0919681908548708	3504	0.142694063926941	91.8285714285714	Core	1.14300832755031	5.03065184543009	5.03065184543009	5.03065184543009	2865.02152932482	602.296876958549	136.448600669967	12.6905627849007	0	0
Chr5	3624089	3629611	5523	LINE/I	0.00917840287769784	5522	0.563382832307135	99.7645780514306	Core	-0.737005248459168	11.7448609606093	11.019120131736	12.2676227838485	383.815369402419	48.7127624192913	136.641764259366	653.649113662819	0.00331207065750736	0.00344901000638706
Chr1	5525105	5525518	414	Unspecified	0.374676496350365	413	0.566585956416465	71.969696969697	Core	-1.05832449628844	5.03065184543009	5.03065184543009	5.16928288619553	0	23.3893201866322	137.340610993093	498.076812200009	0.00309187279151943	0.00530785562632696
Chr6	3118748	3118874	127	Unspecified	0.112078	126	0.53968253968254	92.0634920634921	Core	0.166666666666667	5.37341608798077	5.45974877707783	5.12890085383927	0	0	137.77054681881	1174.88323793841	0.00442477876106195	0.00459770114942529
Chr1	9137723	9137879	157	LTR/Copia	0.141682395209581	156	0.551282051282051	92.3076923076923	Core	-0.6875	6.22548241406888	6.26353154797403	6.96075554649966	0	261.115352586763	138.314735943835	1684.98947376519	0	0.00533333333333333
Chr5	523063	523407	345	LTR/Gypsy	0.403240490797546	344	0.543604651162791	70.6451612903226	Core	-1.1047619047619	5.03065184543009	5.3570277264939	5.03065184543009	0	68.4483216996336	138.327957253967	751.023581102775	0.00225098480585256	0.000624609618988132
Chr1	3056665	3057803	1139	LTR/Gypsy	0.143089409594096	1076	0.170074349442379	88.1801125703565	Core	1.16327453640886	5.03065184543009	5.03065184543009	5.03065184543009	3556.66423878235	734.422035722546	139.407581298986	48.5240824815893	0.00862068965517241	0
Chr7	2020854	2021491	638	Unspecified	0.0910433383685801	637	0.279434850863422	94.6624803767661	Core	1.31877990430622	5.03065184543009	5.03065184543009	5.03065184543009	10.5271128522	1358.68280131828	139.532245025308	81.7555372311805	0.0135593220338983	0
Chr4	966742	967424	683	Unspecified	0.0507208175182482	682	0.595307917888563	96.0176991150443	Core	-0.942105263157895	6.18995338724916	6.53386085452313	6.64718291372872	0	50.6840417468379	139.601624690911	505.329884159125	0.00283687943262411	0.0032051282051282
Chr6	353888	359784	5897	LTR/Copia	0.0964579372715028	5200	0.537115384615385	91.4424007744434	Core	-0.694833333333333	10.2974194067199	10.0381080387546	11.1488998236322	773.445463968359	62.2959186546583	139.926378885491	655.810165366898	0.00282017995433994	0.00235877343781234
Chr1	484786	484990	205	Unspecified	0.175845675675676	204	0.568627450980392	91.5422885572139	Core	-0.175	5.23050551921081	5.48317668247545	5.52990786135643	0	231.308121605658	141.101582961358	711.718643671914	0.00165289256198347	0.00315457413249211
Chr8	1488720	1492856	4137	LTR/Gypsy	0.096129840546697	3942	0.226027397260274	92.025641025641	Core	1.21168831168831	5.03065184543009	5.03065184543009	5.03065184543009	885.682791868822	1013.70223859178	141.644631612632	64.9854531262705	0.00380228136882129	0.00947867298578199
Chr1	2664310	2664637	328	DNA/Mite	0.186826976047904	327	0.46177370030581	86.5203761755486	Core	-0.0769230769230769	5.62139337177178	5.70497904276211	5.40208100629039	0	109.638905914448	142.307125485813	881.503341348248	0.00482509047044632	0.00212089077412513
Chr4	3694971	3695171	201	Unspecified	0.233539814814815	200	0.565	87.0466321243523	Core	-0.15	5.72240747635812	6.43586865126961	5.09975004453444	0	0.880438548825258	144.820849645452	869.633796925752	0.00164203612479475	0.00099601593625498
Chr5	3330043	3330446	404	Unspecified	0.338668342857143	403	0.550868486352357	81.0810810810811	Core	-0.862876254180602	5.77402289081733	6.55310446901406	5.75177846503155	0	0	145.128380875739	937.99505516462	0.000820344544708778	0.00339476236663434
Chr2	403625	403829	205	Unspecified	0.253272248803828	204	0.397058823529412	83.7696335078534	Core	-0.641414141414141	5.33268943692065	5.20046107137664	5.27392591691811	0	110.475520766882	147.161160143748	942.440621565556	0	0.00325732899022801
Chr6	772954	773242	289	Unspecified	0.362312534722222	288	0.652777777777778	73.8007380073801	Core	-1.13247863247863	5.79082932626637	5.78199755963881	6.24132660217936	0	0	148.786900363413	903.096753900766	0.00299625468164794	0.000788643533123028
Chr3	1464586	1464759	174	Unspecified	0.254180842105263	173	0.520231213872832	84.3023255813954	Core	-0.561497326203209	5.03065184543009	5.23020120223024	5.03065184543009	19.4629179476722	0	149.164242966498	1061.53026683624	0	0.00344827586206897
Chr6	1257106	1257401	296	Unspecified	0.326829896907217	295	0.603389830508475	81.2	Core	-0.255060728744939	9.62979812677363	5.76668397978193	7.2210946280135	0	0.59594309937492	150.026062281	824.891591262601	0.00345887778631822	0.00257510729613734
Chr5	1930288	1931206	919	LTR/Copia	0.0929526213592233	918	0.252723311546841	92.0479302832244	Core	1.56680414948131	5.03065184543009	5.03065184543009	5.03065184543009	405.219225143901	1637.43327625197	150.240509071767	165.780114404495	0.0117647058823529	0
Chr1	3772480	3779348	6869	LTR/Gypsy	0.0789351724137931	6865	0.518281136198106	93.5867331963604	Core	-0.354576264468051	5.03065184543009	5.2811073641916	5.41444232733329	256.421889116324	81.0847106342169	150.291103389115	401.081690539881	0.00289218574259547	0.0031622148960506
Chr5	51583	51785	203	Unspecified	0.220526787330317	202	0.608910891089109	86.6336633663366	Core	-0.269005847953216	5.17029132765031	5.11924851457382	5.10018468709118	0	103.729677983736	151.248252358451	770.143308450951	0.00123609394313968	0.00289435600578871
Chr2	597000	603601	6602	LTR/Gypsy	0.0942036480617661	6201	0.186744073536526	91.5750323415265	Core	1.22798031011996	5.03065184543009	5.03065184543009	5.03065184543009	1317.74570642803	793.476566159546	151.39210907772	34.8207102153121	0.00336322869955157	0
Chr1	3093055	3093252	198	Unspecified	0.176645194174757	197	0.416243654822335	87.3096446700508	Core	0.727554179566564	5.03065184543009	5.03065184543009	5.03065184543009	0	674.905560042096	151.520345769855	275.413886444469	0.00520833333333333	0.0194805194805195
Chr5	1907035	1907912	878	LTR/Gypsy	0.158234057142857	877	0.335233751425314	87.2663551401869	Core	1.04519697787372	5.1295646765902	5.31141375903306	5.17381668090902	0	1544.66410456954	151.856047813926	270.050602327568	0.0130890052356021	0.00837320574162679
Chr1	2426795	2426922	128	Unspecified	0.102701374045802	127	0.52755905511811	92.9133858267717	Core	0.157894736842105	5.03065184543009	5.03065184543009	5.03065184543009	0	66.745627129991	152.01844026614	595.380019225543	0.00672645739910314	0.00854700854700855
Chr6	2221845	2222547	703	LTR/Gypsy	0.108569491525424	702	0.168091168091168	91.235632183908	Core	1.18039327443716	5.03065184543009	5.03065184543009	5.03065184543009	4.77549484593383	794.056349007063	152.163676378894	19.8176896556291	0	0
Chr4	1017022	1022938	5917	LTR/Copia	0.109617650220772	5214	0.53970080552359	90.249082834524	Core	-0.704031713900135	10.3338491305521	10.144425803077	11.2224182290891	611.797000819372	58.6788849162036	152.941064533104	629.233974672067	0.00351428835660779	0.00307881773399015
Chr8	985414	985539	126	Unspecified	0.0626937984496124	125	0.48	96.8	Core	1.17647058823529	6.06793568612846	5.76221792295328	5.86167880152439	0	1.41296186464699	153.05319141326	1168.353263534	0	0
Chr5	2006902	2007103	202	LTR/Gypsy	0.116017169811321	201	0.512437810945274	93.5323383084577	Core	-0.111455108359133	5.03065184543009	5.11186440223292	5.03065184543009	16.7381094349981	404.728796509483	155.51904838603	678.733221917119	0.00635324015247776	0.00666666666666667
Chr6	2267446	2271885	4440	LTR/Gypsy	0.120090262529833	2490	0.195582329317269	90.3160453808752	Core	1.22041105598866	5.13283576313994	5.03065184543009	5.03065184543009	63.3619284605606	505.092795840559	156.761179785339	207.940295132851	0.0163265306122449	0
Chr2	678524	678739	216	DNA/Mite	0.291388584070796	215	0.409302325581395	78.8732394366197	Core	0.0160183066361557	5.13283576313994	5.27900327310272	5.03065184543009	0	1.63745113286193	156.841112211477	897.706944875897	0.00732600732600733	0.00485436893203883
Chr5	1223040	1223172	133	DNA/hAT	0.200447957746479	132	0.371212121212121	87.7862595419847	Core	0.716577540106952	5.03065184543009	5.03065184543009	5.03065184543009	0	283.54153815145	156.947674655328	569.625667248866	0	0.004739336492891
Chr7	2008166	2009648	1483	LTR/Gypsy	0.131340746371804	1480	0.167567567567568	90.1137980085349	Core	1.08558238636364	5.03065184543009	5.03065184543009	5.03065184543009	2.26037939702878	593.646243729253	157.57355600823	20.63662456915	0.0199335548172757	0
Chr1	2951404	2952170	767	Unspecified	0.28675727027027	766	0.254569190600522	79.739507959479	Core	1.3915770609319	5.03065184543009	5.03065184543009	5.03065184543009	0	1006.35392120797	157.580690805829	63.8185118646987	0.00423728813559322	0
Chr7	2029328	2030853	1526	LTR/Gypsy	0.127481277561608	1523	0.148391332895601	89.4009216589862	Core	1.16482813749001	5.03065184543009	5.03065184543009	5.03065184543009	0	523.207540226408	157.624552651884	12.7618639291564	0.0118577075098814	0
Chr1	2975123	2982694	7572	LTR/Gypsy	0.0956186896459228	7421	0.210888020482415	91.5732613099257	Core	1.25350832046663	5.03065184543009	5.03065184543009	5.03065184543009	416.131069440771	947.045062566123	157.806758902332	41.422299884472	0.00711743772241993	0.00956937799043062
Chr4	1354034	1359950	5917	LTR/Copia	0.109617650220772	5214	0.53970080552359	90.249082834524	Core	-0.704031713900135	10.3322562456609	10.1440599899145	11.221686484804	585.763085890888	59.3601642463766	157.813312898184	657.350540246089	0.00220710778793748	0.00348874088169997
Chr1	2984150	2991721	7572	LTR/Gypsy	0.0949383607885498	7377	0.191947946319642	91.5274949083503	Core	1.16094187846749	5.03065184543009	5.03065184543009	5.03065184543009	3658.9463002688	764.547132111705	157.85318631007	26.2166454965012	0.007883565797453	0.0125
Chr3	888285	888543	259	DNA/Mite	0.122330229885057	258	0.317829457364341	89.8832684824903	Core	0.857843137254902	5.03065184543009	5.03065184543009	5.10018468709118	0	0.681740354926951	157.949834804778	378.386782646584	0.0032051282051282	0
Chr4	2922761	2930332	7572	LTR/Gypsy	0.102152544235925	7423	0.227940185908662	90.9483340078241	Core	1.28646238983398	5.03065184543009	5.03065184543009	5.03065184543009	94.193323901046	1108.71253805428	158.38710149906	66.9573125980642	0.00831129580657348	0.00544959128065395
Chr3	2438850	2441511	2662	LTR/Gypsy	0.140039261876718	2554	0.183241973375098	88.9112093210124	Core	1.12652895203231	5.03065184543009	5.03065184543009	5.03065184543009	1214.45681238896	862.467672671153	158.815595055442	38.7966929821156	0.00930232558139535	0.0192307692307692
Chr7	1989207	1990518	1312	LTR/Gypsy	0.0951009379727685	1311	0.189168573607933	92.1779141104295	Core	1.18627802690583	5.03065184543009	5.03065184543009	5.03065184543009	1924.24372588604	993.197859581448	158.959824330396	39.0860165293105	0.00847457627118644	0
Chr2	330400	330721	322	DNA/Mite	0.190719357798165	321	0.485981308411215	85.1735015772871	Core	-0.105263157894737	5.03065184543009	5.11186440223292	5.03065184543009	0	0	159.253262824677	533.361267222882	0.00383631713554987	0.0054249547920434
Chr6	532038	532193	156	LTR/Copia	0.139620833333333	155	0.567741935483871	93.5483870967742	Core	0.171428571428571	5.53162779383297	5.35964391047046	5.50388265414672	0	6.82625732011271	159.752489353908	1061.88990441958	0	0
Chr1	6311890	6312149	260	DNA/Mite	0.101458544061303	259	0.301158301158301	91.1196911196911	Core	0.497219132369299	5.20485363606043	5.37053423574382	5.31698141925331	0	89.6409294594646	160.062087201493	412.304509437844	0.00344827586206897	0.00497512437810945
Chr4	965088	966705	1618	Unspecified	0.0509728729281768	1617	0.641311069882498	95.7328385899815	Core	-0.585672514619883	6.63810447894389	7.2127868255788	5.09975004453444	4.14309639480151	23.9608953829121	160.286315741601	716.470097393114	0.0042473454091193	0.00448504983388704
Chr1	7569445	7569697	253	DNA/Mite	0.158329618320611	252	0.468253968253968	88.4920634920635	Core	-0.0268817204301075	5.03065184543009	5.03065184543009	5.09975004453444	0	0.69803693711644	160.325307044819	1462.75303528188	0.00189753320683112	0
Chr1	7371901	7372226	326	DNA/Mite	0.241279027355623	325	0.44	80.9375	Core	0.285869565217391	5.59753525779347	5.52839586839671	5.36297071073068	0	0.540763182766131	160.541390535903	927.371758341021	0.00355871886120996	0.00286123032904149
Chr1	1832254	1832394	141	Unspecified	0.292316115107914	140	0.657142857142857	77.6119402985075	Core	-1.08571428571429	5.49804435842911	5.14536808661724	7.6886894805982	0	0	160.5569982931	939.47254832232	0.00263852242744063	0.00219298245614035
Chr1	3092910	3093054	145	LTR/Copia	0.135743184713376	144	0.548611111111111	94.4444444444444	Core	-0.32967032967033	6.03837990788969	5.88630477335027	6.80003257502158	23.4099432657316	928.721060013284	160.981354656631	505.170925403491	0	0.00421940928270042
Chr6	2239158	2245877	6720	LTR/Gypsy	0.0912865258502364	6531	0.213290460878885	91.8007662835249	Core	1.2612448950852	5.03065184543009	5.03065184543009	5.03065184543009	7.97290118963886	1029.67524187077	162.334972286899	47.6800313104112	0.00326086956521739	0
Chr2	2331837	2332061	225	Unspecified	0.171313021276596	224	0.46875	88.3408071748879	Core	0.0476190476190474	5.5938240127013	5.23431273126307	5.66361590492435	0	3.14273132226415	163.119470071233	727.983341893116	0.010989010989011	0
Chr1	3012797	3020367	7571	LTR/Gypsy	0.0917548344725908	7428	0.222940226171244	91.8306821245619	Core	1.27498891873561	5.03065184543009	5.03065184543009	5.03065184543009	306.500458143841	960.38769659004	163.190682049872	47.5632780585342	0.00962745918794475	0.0099009900990099
Chr4	3032065	3032732	668	Unspecified	0.114417341040462	667	0.307346326836582	93.1818181818182	Core	1.46984478935698	5.03065184543009	5.03065184543009	5.03065184543009	0	1927.54305735929	163.854242458941	171.045110628359	0.00204918032786885	0
Chr1	2982697	2991839	9143	LTR/Gypsy	0.0974238083228247	1571	0.227243793761935	91.8315252074027	Core	1.26780466724287	5.03065184543009	5.03065184543009	5.03065184543009	3030.1086853774	861.756800555906	164.423952038986	32.1322403987093	0.0102564102564103	0.0151515151515152
Chr8	985575	985717	143	Unspecified	0.258952751677852	142	0.457746478873239	82.0143884892086	Core	-1.13095238095238	5.5804690132158	5.27581516969108	5.69288868071225	0	0	164.511074143173	1210.46528731434	0	0
Chr7	272983	273251	269	LTR/Gypsy	0.497759701492537	268	0.541044776119403	64.0151515151515	Core	-0.578947368421053	5.03065184543009	5.03065184543009	5.2023543974499	0	89.9003601371648	164.539080795224	673.426089161476	0.00543056633048875	0.0076530612244898
Chr6	3159009	3159125	117	DNA/Mite	0.322226721311475	116	0.508620689655172	78.3783783783784	Core	-1.03296703296703	6.65819560656241	5.80092255779653	5.57684960253238	0	0	165.031267262994	1183.85708170644	0	0.00264550264550265
Chr5	1915676	1923247	7572	LTR/Gypsy	0.0974704768981356	7364	0.236013036393265	91.280727964145	Core	1.29584473011272	5.03065184543009	5.03065184543009	5.03065184543009	1013.13100965867	1135.14407091147	165.769059329443	63.182115646568	0.00806761429120246	0.0132743362831858
Chr1	3025188	3026424	1237	LTR/Gypsy	0.103969216	1236	0.199838187702265	91.1812297734628	Core	1.18257425742574	5.03065184543009	5.03065184543009	5.03065184543009	8.13187502914886	984.849292941735	166.763489291545	43.3880175953837	0.00757575757575758	0
Chr8	1560451	1561877	1427	LTR/Gypsy	0.186294054855448	1345	0.15092936802974	84.6153846153846	Core	1.16637906241012	5.23174859430004	5.1977907162999	5.03065184543009	0	356.070356099783	167.095498513684	38.4385696622807	0.0377358490566038	0
Chr6	2300447	2303575	3129	LTR/Gypsy	0.104963197969543	3128	0.187020460358056	91.3421306726746	Core	1.19707237733803	5.03065184543009	5.03065184543009	5.03065184543009	2.14110769875255	600.646609350159	167.185807934335	27.163697711175	0.011454753722795	0.03125
Chr4	3052593	3052928	336	LTR/Gypsy	0.154266869565217	335	0.119402985074627	88.5885885885886	Core	1.171875	5.03065184543009	5.03065184543009	5.03065184543009	0	1052.29277263398	167.309643041907	34.4631148853109	0	0
Chr7	2020134	2020817	684	LTR/Copia	0.0676853735632184	683	0.1800878477306	95.1683748169839	Core	1.24227318045862	5.03065184543009	5.03065184543009	5.03065184543009	0	602.178656496825	167.740113821604	54.7074504469219	0	0
Chr6	2795435	2795548	114	Unspecified	0.189384700854701	113	0.469026548672566	88.0733944954129	Core	-0.107142857142857	5.41695146746738	5.70425298718629	5.95268175940608	0	3.12870127171833	167.882749972812	1148.23289422069	0	0
Chr5	590749	592376	1628	Unspecified	0.051240743902439	1627	0.640442532267978	95.759065765212	Core	-0.565895953757225	6.6462639313851	7.23143912794651	5.09975004453444	2.05880804858525	35.127657082712	167.946436224828	774.799582214791	0.00278666529053566	0.00259104649488988
Chr1	6162070	6162750	681	DNA/Mite	0.246912869127517	590	0.522033898305085	80.3786574870912	Core	-0.296583850931677	6.47173480796225	5.93982233849704	6.0931359235691	0	54.18781584007	167.963626141024	1048.12604268179	0.00125391849529781	0.00254582484725051
Chr4	2913017	2920587	7571	LTR/Gypsy	0.0968161450020289	7360	0.186413043478261	91.4488017429194	Core	1.21832952033813	5.03065184543009	5.03065184543009	5.03065184543009	361.785533566612	874.97154772125	167.973336837505	27.5311146424812	0.0056390977443609	0.0152671755725191
Chr4	2930997	2938567	7571	LTR/Gypsy	0.0897630196818549	7381	0.191708440590706	92.0010845986985	Core	1.19557476548406	5.03065184543009	5.03065184543009	5.03065184543009	4.86508663720383	992.980091605557	167.996553608319	31.5690114567118	0.0054127198917456	0.0186915887850467
Chr6	2199630	2200480	851	LTR/Gypsy	0.117440489596083	808	0.191831683168317	89.9752475247525	Core	1.38747645951036	5.03065184543009	5.03065184543009	5.03065184543009	3.94301753474631	824.444108962101	168.069403405077	43.478870661936	0.00884955752212389	0
Chr4	2904530	2912101	7572	LTR/Gypsy	0.0943873201293452	7384	0.174837486457205	91.5977774766228	Core	1.20673758408288	5.03065184543009	5.03065184543009	5.03065184543009	984.386568092622	798.037874707461	168.160070827963	23.9620139838021	0.0140845070422535	0
Chr5	3609867	3610254	388	DNA/Mutator	0.252647378640777	387	0.48578811369509	85.3260869565217	Core	0.788888888888889	6.31465650766484	5.48744121120109	5.22419553571217	0	265.988240758312	168.443686961245	684.841265637671	0.00148514851485149	0.00218579234972678
Chr1	2991839	2997565	5727	LTR/Gypsy	0.0795343185840708	5623	0.203983638627067	92.8673070081821	Core	1.22901829628172	5.03065184543009	5.03065184543009	5.03065184543009	3.5084246850651	960.594904617452	168.51445994904	40.7666318840896	0.00478468899521531	0
Chr3	2441511	2444348	2838	LTR/Gypsy	0.0949687139689579	2683	0.193067461796496	91.7971662938106	Core	1.18792270531401	5.03065184543009	5.03065184543009	5.03065184543009	993.89902286801	1015.34961298966	168.973745527122	30.0909036515025	0.00527240773286467	0.0163934426229508
Chr1	4734942	4735211	270	LTR/Copia	0.284537101449275	269	0.449814126394052	78.1954887218045	Core	-0.557029177718833	5.51602026875276	5.58488560778301	5.2433495225701	12.4911264440284	162.785860197166	169.17073312925	490.225836725509	0.00940438871473354	0.0148514851485149
Chr5	457279	457522	244	Unspecified	0.175224819277108	243	0.473251028806584	86.0082304526749	Core	0.480769230769231	5.13283576313994	5.11924851457382	5.20439307525702	124.498334640482	0.723996988496803	169.192409179366	583.898861830009	0.00253164556962025	0.00380228136882129
Chr3	1195228	1195370	143	Unspecified	0.34803	142	0.514084507042254	76.0330578512397	Core	-0.891025641025641	5.23174859430004	5.22391028834331	5.10471848180467	0	0	169.496258208118	650.273212487473	0.00311203319502075	0.00292397660818713
Chr1	5532098	5533397	1300	LINE/I	0.0285921729323308	1299	0.551963048498845	99.4611239414935	Core	-0.450298685782557	9.85408179648827	9.52471842602957	10.2090765579552	680.872248203312	44.5442214956508	169.770865804916	694.151332122231	0.00173210161662818	0.00306999590667212
Chr6	2169105	2169372	268	LTR/Gypsy	0.113747111111111	267	0.329588014981273	90.6015037593985	Core	1.88047138047138	5.03065184543009	5.03065184543009	5.03065184543009	12.5850446879685	1516.92611131943	170.442693528719	192.491284411266	0.0123456790123457	0
Chr7	2201107	2201355	249	Unspecified	0.1309348	248	0.435483870967742	90.1234567901235	Core	0.0280172413793103	6.66215254309176	6.17351663021035	6.54162233134663	0	0.709341179013062	170.747599957214	784.198243946195	0	0.00496277915632754
Chr5	1881393	1884016	2624	LTR/Copia	0.0644859528411287	2573	0.191993781577925	94.3234836702955	Core	1.18058548009368	5.03065184543009	5.03065184543009	5.03065184543009	1.2767436639968	651.648096453333	171.237365114096	35.1203062446799	0.003690036900369	0
Chr1	8308881	8309126	246	DNA/Mite	0.299522162162162	245	0.43265306122449	78.2786885245902	Core	0.0909090909090908	5.23377660576055	5.31250695748704	5.22822020606754	0	0.718062586951747	171.406564396939	938.618227030433	0	0.00149925037481259
Chr1	2936322	2938241	1920	LTR/Gypsy	0.0817076536611438	1860	0.226881720430108	92.7918235610543	Core	1.30439135381115	5.03065184543009	5.03065184543009	5.03065184543009	1724.42670717186	1045.67134182072	172.062926229042	64.7737038643014	0.00449943757030371	0
Chr4	1039130	1039824	695	Unspecified	0.0628803165467626	694	0.605187319884726	94.0922190201729	Core	-0.673202614379085	6.84765724300686	6.79891551824028	7.91257914799284	4.83062321356366	52.5874637993868	172.43125835025	844.242566944157	0.00562399571505088	0.00280014000700035
Chr4	3018252	3019564	1313	LTR/Copia	0.0803556904400607	1312	0.214176829268293	92.7591463414634	Core	1.1780269058296	5.03065184543009	5.03065184543009	5.03065184543009	8071.57344378779	1133.03374932965	172.510754521989	53.2859818884798	0.012987012987013	0
Chr5	1876525	1876643	119	LTR/Copia	0.128004754098361	118	0.279661016949153	91.4529914529915	Core	1.16666666666667	5.03065184543009	5.03065184543009	5.03065184543009	0	1451.07560520105	172.723845327089	213.726160747631	0	0
Chr5	1972831	1975896	3066	LTR/Gypsy	0.115474249414911	2971	0.19959609559071	89.8619063657797	Core	1.17074941654421	5.03065184543009	5.03065184543009	5.03065184543009	1213.84070380436	1015.61891125046	173.032175724156	45.469622878191	0.0148760330578512	0
Chr1	2974263	2974931	669	LTR/Gypsy	0.0846510935023772	626	0.138977635782748	92.6517571884984	Core	1.17391304347826	5.03065184543009	5.03065184543009	5.03065184543009	5.01892336881502	983.472299000827	173.093139514347	26.1836290314082	0.0909090909090909	0
Chr7	2021479	2026782	5304	LTR/Gypsy	0.0883710949043379	5256	0.181126331811263	92.0967434774329	Core	1.2174386406545	5.03065184543009	5.03065184543009	5.03065184543009	450.180008568602	714.179469167311	173.440825059959	25.0040143871912	0.0114583333333333	0
Chr8	1288007	1288187	181	Unspecified	0.238258826530612	180	0.366666666666667	85.8757062146893	Core	0.304761904761905	5.03065184543009	5.03065184543009	5.4956902950449	0	1.95762314208074	173.764299872659	452.355768797061	0	0
Chr7	2012563	2020134	7572	LTR/Gypsy	0.091400670624747	7373	0.202902482029025	91.8328584995252	Core	1.20493770243753	5.03065184543009	5.03065184543009	5.03065184543009	759.737701699517	828.589208657979	173.893855683638	26.2166454965012	0.00781657113079729	0.0114942528735632
Chr8	1473724	1481276	7553	LTR/Gypsy	0.0933771915584416	7354	0.205194451998912	91.7233868772121	Core	1.21015141720095	5.03065184543009	5.03065184543009	5.03065184543009	1518.42205839938	807.19249782414	174.215050832167	40.2649622325313	0.010989010989011	0
Chr4	2912101	2922761	10661	LTR/Gypsy	0.0880480019398642	3088	0.241256476683938	91.9558871229322	Core	1.35355181880577	5.03065184543009	5.03065184543009	5.03065184543009	404.830154080355	971.143708671157	174.227482713323	42.7492423974059	0.00741656365883807	0.0101010101010101
Chr1	8651253	8651380	128	Unspecified	0.0943251908396947	127	0.511811023622047	93.7007874015748	Core	0.0526315789473685	5.03065184543009	5.03065184543009	5.10018468709118	26.5684276746001	166.864067824977	174.333073699701	598.530178057424	0	0
Chr3	1305477	1307745	2269	LINE/I	0.02041890625	2268	0.55026455026455	99.5149911816578	Core	-0.685882664047448	11.1114590550533	10.430303596588	11.5309635021412	490.256050500164	38.3338361372952	174.487489585007	635.737347392427	0.003393463118414	0.00310318076027929
Chr5	1923247	1928994	5748	LTR/Gypsy	0.0980312104981253	5582	0.208348262271587	91.3535861944994	Core	1.22334807544731	5.03065184543009	5.03065184543009	5.03065184543009	91.4682624885033	972.177763346144	174.535016083715	45.1076868029098	0.0087260034904014	0.0149253731343284
Chr4	2938567	2941284	2718	LTR/Gypsy	0.101830595054096	2566	0.188620420888542	91.153546375682	Core	1.23737145723602	5.03065184543009	5.03065184543009	5.03065184543009	1.23255592304846	1003.50674191444	174.563121467058	31.85882282552	0.00900900900900901	0
Chr5	135871	136185	315	DNA/Mite	0.204979689440994	314	0.445859872611465	84.2443729903537	Core	-0.0789473684210527	6.90301805740941	6.45781314660185	5.74071353231308	10.695277594248	7.27697931568991	174.604877341763	1095.65140918183	0.00432900432900433	0.00403225806451613
Chr8	1406180	1406812	633	LTR/Gypsy	0.314541692307692	632	0.245253164556962	78.655462184874	Core	1.11111111111111	5.03065184543009	5.03065184543009	5.03065184543009	0	393.17511258665	174.892265682535	121.40342705814	0.0204081632653061	0
Chr4	3038495	3045670	7176	LTR/Gypsy	0.0979941104987989	7043	0.228737753798097	91.299402900199	Core	1.27555706032969	5.03065184543009	5.03065184543009	5.03065184543009	2.79979527766904	905.734159510032	175.066370999947	52.6165224684966	0.00937366851299531	0.00847457627118644
Chr4	3036215	3037108	894	LTR/Copia	0.0897977433628319	893	0.217245240761478	92.9133858267717	Core	1.43144368858655	5.03065184543009	5.03065184543009	5.03065184543009	3.75293933520136	1304.82276086255	175.136725716577	78.7610339334239	0.00900900900900901	0
Chr3	2433588	2436704	3117	LTR/Gypsy	0.0953744008056395	2959	0.207164582629267	91.5849949307198	Core	1.24716075805171	5.03065184543009	5.03065184543009	5.03065184543009	1276.71743234528	981.554443015848	175.163604298001	41.6670446841632	0.00273972602739726	0.025
Chr8	1458986	1466562	7577	LTR/Gypsy	0.0967079154853517	7372	0.215545306565383	91.4029607496944	Core	1.26551964659382	5.03065184543009	5.03065184543009	5.03065184543009	1178.18613211102	914.686039276157	175.588548001545	44.5388793260032	0.00837871805613741	0.0116279069767442
Chr5	1915442	1930233	14792	LTR/Gypsy	0.148558929743926	1473	0.276985743380855	89.3515358361775	Core	1.2431455399061	5.03065184543009	5.03065184543009	5.03065184543009	554.089139917178	1061.0168523652	175.656449145977	62.6108444829025	0.00705218617771509	0.0029940119760479
Chr1	3135455	3135688	234	Unspecified	0.25901510373444	233	0.424892703862661	80.1724137931034	Core	-0.208333333333333	6.50913925802971	6.51769197600837	6.40960274333291	0	114.035767041596	175.727738289299	609.066916219234	0.00740740740740741	0.0037243947858473
Chr5	1907912	1915442	7531	LTR/Gypsy	0.106632098033935	7390	0.202435723951286	90.5665492003253	Core	1.22262396694215	5.03065184543009	5.03065184543009	5.10018468709118	1352.56551736656	972.936751531307	176.264560972345	37.6412390956779	0.00477611940298507	0
Chr2	306002	306209	208	Unspecified	0.259294545454545	207	0.454106280193237	82.3529411764706	Core	-0.807017543859649	5.03065184543009	5.10919404715617	5.03065184543009	0	0.850520734059351	176.580785562548	574.185261259585	0.00521739130434783	0.00678733031674208
Chr2	507701	513666	5966	LTR/Gypsy	0.0638668560922614	5965	0.52070410729254	94.4005380864301	Core	-0.373827062242046	5.13283576313994	5.03065184543009	5.03065184543009	288.510672353756	108.579153993154	177.289369766384	494.818962993731	0.00298456553253176	0.00323624595469256
Chr7	1984986	1988959	3974	LTR/Copia	0.0903085831622176	3872	0.231663223140496	91.9938016528926	Core	1.23422140560404	5.03065184543009	5.03065184543009	5.03065184543009	822.577784922363	1042.90672541924	177.408920075551	50.1646139058783	0.00801603206412826	0.00869565217391304
Chr4	2958563	2961803	3241	LTR/Gypsy	0.0870267281105991	3240	0.159876543209877	92.1604938271605	Core	1.17827060454206	5.03065184543009	5.03065184543009	5.03065184543009	2.06707124853326	739.559682639162	177.626617832407	19.9746718398196	0.00683760683760684	0
Chr2	555240	562807	7568	LTR/Gypsy	0.106643502143623	7425	0.235286195286195	90.5731625084289	Core	1.28668378576669	5.03065184543009	5.03065184543009	5.03065184543009	602.18257840424	926.843222727761	178.2593697291	52.5134724861017	0.00583991755410512	0.0134680134680135
Chr3	2520113	2521117	1005	LTR/Gypsy	0.143973975535168	971	0.33264675592173	89.1692954784437	Core	1.48949579831933	5.03065184543009	5.03065184543009	5.03065184543009	0	1622.28307854945	178.530972399597	149.191271018963	0.0152046783625731	0.0142857142857143
Chr7	1961004	1968569	7566	LTR/Gypsy	0.0824898257227776	7364	0.193373166757197	92.6252886051881	Core	1.20771537865213	5.03065184543009	5.03065184543009	5.10018468709118	3.98315666089325	860.586428807041	178.678217237308	28.12653713246	0.00910746812386157	0
Chr2	532442	538348	5907	LTR/Gypsy	0.101493612746796	5743	0.216611527076441	91.0851360781577	Core	1.27341624068564	5.03065184543009	5.03065184543009	5.03065184543009	90.1391837481692	923.895683510729	178.763170855854	52.3625215892405	0.0120292887029289	0
Chr5	1932697	1936600	3904	LTR/Gypsy	0.11882436461126	3728	0.239270386266094	90.1251360174102	Core	1.27408581695202	5.03065184543009	5.03065184543009	5.03065184543009	4.28962312531986	1040.73657925415	179.105385744885	74.6640926211428	0.00765483646485734	0.0125
Chr4	3032851	3036212	3362	LTR/Copia	0.0976712991656734	3315	0.253092006033182	92.1004842615012	Core	1.24950980392157	5.03065184543009	5.2648890227927	5.17381668090902	965.430240625782	1328.39441495041	179.127233226443	105.136551014034	0.0142857142857143	0
Chr4	1388135	1389763	1629	Unspecified	0.0506278292682927	1628	0.640663390663391	95.7616707616708	Core	-0.588342967244701	6.6462639313851	7.22844763558248	5.09975004453444	0	22.6143374034465	179.291976373839	828.238133690112	0.00299564270152505	0.00301677325932183
Chr2	1246994	1247436	443	Unspecified	0.327594660633484	442	0.538461538461538	75.1173708920188	Core	-0.863636363636364	5.34909423761091	5.4583900925575	8.06770435373924	0	71.1158765254071	179.712494259578	536.427046800338	0.00656565656565657	0.00342700479780672
Chr6	2231814	2239158	7345	LTR/Gypsy	0.100832877817979	7152	0.232522371364653	91.0401791964161	Core	1.25125668327012	5.03065184543009	5.03065184543009	5.10018468709118	78.4135863494395	1040.36326291296	180.083239905621	54.540690852837	0.0137189469781238	0.00374531835205993
Chr2	582171	586580	4410	LTR/Gypsy	0.0894921644826028	4409	0.194828759355863	92.0245398773006	Core	1.24213816316717	5.03065184543009	5.03065184543009	5.03065184543009	1018.41219384448	755.998706563662	180.312286815449	30.795518235804	0.00579374275782155	0
Chr4	2953002	2958563	5562	LTR/Gypsy	0.0931466907384004	5514	0.199673558215452	91.7514534883721	Core	1.21745203263986	5.03065184543009	5.03065184543009	5.03065184543009	776.696445005307	961.119023758076	180.500200246436	32.4103751472898	0.00865800865800866	0.0105263157894737
Chr8	180119	180260	142	Unspecified	0.222520677966102	141	0.560283687943262	83.9285714285714	Core	-2.375	5.03065184543009	5.03065184543009	5.16928288619553	0	0	180.74853081185	1539.48262114033	0.00627615062761506	0.00484848484848485
Chr4	3010655	3015887	5233	LTR/Gypsy	0.0996610497237569	5043	0.19611342454888	91.2179614544009	Core	1.23039074939312	5.03065184543009	5.03065184543009	5.03065184543009	1730.44725338309	983.384722406501	180.833954351232	36.6492766565905	0.00852618757612667	0.0105263157894737
Chr2	562807	563552	746	LTR/Gypsy	0.0970324074074074	745	0.166442953020134	92.0805369127517	Core	1.12727272727273	5.03065184543009	5.03065184543009	5.03065184543009	0	1013.329150596	180.923988615058	50.1484962430117	0.0132450331125828	0
Chr4	184371	184557	187	Unspecified	0.356259116022099	186	0.564516129032258	77.8481012658228	Core	-1.2	5.13159268805071	5.23431273126307	5.03065184543009	0	0	181.427016287871	697.291914408294	0.00253807106598985	0.00269905533063428
Chr7	1983696	1984983	1288	LTR/Gypsy	0.10604856374808	1287	0.202020202020202	91.2704598597038	Core	1.20555760029444	5.03065184543009	5.03065184543009	5.03065184543009	2.60312743934651	837.752341141972	181.60354913412	58.6429256883635	0.00831600831600832	0
Chr2	532108	540994	8887	LTR/Gypsy	0.102731498417165	2822	0.200921332388377	91.1253106141285	Core	1.22668045056105	5.03065184543009	5.03065184543009	5.03065184543009	940.046888921108	915.889354970045	181.779813462796	60.7553424233156	0.0114754098360656	0
Chr8	1471829	1485116	13288	LTR/Gypsy	0.0879377933109184	5625	0.184711111111111	92.1366304927949	Core	1.20579308126797	5.03065184543009	5.03065184543009	5.03065184543009	1544.55232329577	860.4225212836	181.83839726037	36.7164455631588	0.00966702470461869	0
Chr4	382871	382986	116	DNA/Mite	0.226953157894737	115	0.565217391304348	81.981981981982	Core	-0.128205128205128	5.03065184543009	5.03065184543009	5.03065184543009	0	298.159742245157	181.893623843309	1956.74602809798	0	0
Chr5	1884021	1891595	7575	LTR/Gypsy	0.0973281166219839	7425	0.206464646464646	91.3553607552259	Core	1.23086828550405	5.03065184543009	5.03065184543009	5.03065184543009	610.466898976161	896.719744496199	181.96975091307	44.8651169908064	0.0101876675603217	0.0111524163568773
Chr1	462160	462636	477	LTR/Gypsy	0.051792828685259	476	0.51890756302521	100	Core	-0.378662244333886	5.03065184543009	5.03065184543009	5.03065184543009	0	341.930821931456	182.01694155439	599.975935163425	0.00155400155400155	0.00236220472440945
Chr6	2268888	2270750	1863	DNA/Tc1-Mariner	0.00375017148981779	1862	0.547261009667025	99.8388829215897	Core	-0.625148514851485	5.03065184543009	5.03065184543009	5.03065184543009	151.101686463175	271.613636463629	182.148741085469	457.065871825305	0.00375086368571711	0.00251814545993186
Chr8	1448848	1456418	7571	LTR/Gypsy	0.0964931460825158	7408	0.199379049676026	91.4525290776305	Core	1.22534545747905	5.03065184543009	5.03065184543009	5.03065184543009	303.846774523548	851.129099663024	182.205217346336	35.4495876158424	0.012012012012012	0.00602409638554217
Chr6	2318282	2323578	5297	LTR/Gypsy	0.103344052762378	5195	0.182675649663138	91.2589441113904	Core	1.16867879381135	5.03065184543009	5.03065184543009	5.03065184543009	221.910346050399	731.800568501995	182.365235486251	27.8855986341709	0.0140845070422535	0
Chr3	1069032	1069183	152	Unspecified	0.2847545	151	0.543046357615894	78.9473684210526	Core	-0.404761904761905	5.03065184543009	5.03065184543009	5.03065184543009	28343.1986432634	160.022641044153	182.756847820871	1489.77311477325	0	0.00258397932816538
Chr4	2986718	2987039	322	LTR/Gypsy	0.112659577039275	320	0.4125	92.4764890282132	Core	1.3969696969697	5.03065184543009	5.03065184543009	5.03065184543009	10.4613183968738	1377.56716993758	182.866677657302	368.391386895805	0.0281329923273657	0.00854700854700855
Chr4	2965249	2966856	1608	LTR/Gypsy	0.11206529562982	1545	0.248543689320388	90.3896103896104	Core	1.31116292626057	5.03065184543009	5.03065184543009	5.03065184543009	8.33778801245234	928.293070223456	183.168265190714	81.3117585409729	0.00851581508515815	0
Chr5	1979233	1986794	7562	LTR/Gypsy	0.10106025865553	7388	0.245668651867894	91.0150426887112	Core	1.33308404132264	5.03065184543009	5.03065184543009	5.03065184543009	1389.52876738159	958.796298609325	183.212438253473	72.4011504860692	0.00719659797186784	0.0132013201320132
Chr3	2476469	2484036	7568	LTR/Gypsy	0.0908543224676724	7393	0.218314621939673	91.9365767719203	Core	1.23391253611123	5.03065184543009	5.03065184543009	5.03065184543009	122.560304348255	1051.42888478741	183.276180655678	43.1754124436181	0.00622710622710623	0.00664451827242525
Chr6	2261855	2267446	5592	LTR/Gypsy	0.0954441624365482	5493	0.181685781904242	91.5192412912639	Core	1.19254986671569	5.03065184543009	5.03065184543009	5.03065184543009	323.98272645202	763.640421451188	183.303835771897	25.2779113708161	0.00593220338983051	0.0106382978723404
Chr2	551482	555240	3759	LTR/Gypsy	0.102752580645161	3711	0.171651845863649	90.7152496626181	Core	1.15272199910754	5.03065184543009	5.03065184543009	5.03065184543009	34.7504002110687	695.512707723928	183.305032301241	24.0877729364606	0.0121317157712305	0
Chr6	1026828	1027014	187	DNA/Mite	0.247998743455497	186	0.231182795698925	80.9782608695652	Core	0.834757834757835	5.03065184543009	5.03065184543009	5.03065184543009	0	442.279976529609	183.326775620728	261.75265710096	0.0760869565217391	0
Chr8	1582194	1582507	314	DNA/Mite	0.220115448916409	313	0.428115015974441	84.0390879478827	Core	0.0147368421052632	5.79845628482033	5.99328082169765	5.44753600029352	0	192.615685984505	183.612957315101	1012.65490449473	0.00248756218905473	0.00261780104712042
Chr2	624036	627984	3949	LTR/Gypsy	0.126127602323739	3770	0.208753315649867	89.143771672446	Core	1.24959742351047	5.03065184543009	5.03065184543009	5.03065184543009	4198.30968853512	962.641217024344	184.721151801951	36.3030465231688	0.00489396411092985	0.0208333333333333
Chr1	3362930	3363184	255	DNA/Mite	0.183593625954198	254	0.47244094488189	87.14859437751	Core	-0.122222222222222	5.31738472381821	5.5649733392555	5.2433495225701	13.2317070632396	0.692518858562159	184.757226817998	652.643183129976	0.00598802395209581	0.00138504155124654
Chr2	588370	595939	7570	LTR/Gypsy	0.0936881869158879	7448	0.208780880773362	91.7215428033866	Core	1.2578357230285	5.03065184543009	5.03065184543009	5.03065184543009	149.510596961664	915.138507387184	185.178212586834	41.3283522859168	0.00422832980972516	0.00625
Chr5	1949790	1957362	7573	LTR/Gypsy	0.0942197854652722	7416	0.224514563106796	91.7094247907102	Core	1.25376007325054	5.03065184543009	5.03065184543009	5.03065184543009	4.4216376793021	933.983655925991	185.290521035989	54.8379782600201	0.00565709312445605	0.0108695652173913
Chr7	1816758	1817014	257	DNA/Mite	0.115001081081081	256	0.3125	90.234375	Core	0.487684729064039	5.1295646765902	5.10919404715617	5.20482771781376	13.1279289686259	0.687087338102848	185.375535685574	297.300872345304	0.0481927710843374	0.0547945205479452
Chr4	3782582	3784444	1863	DNA/Tc1-Mariner	0.00321132904608789	1862	0.547798066595059	99.8925886143931	Core	-0.620148514851485	8.17997675516341	8.01651068470033	7.50262618457588	169.089982470695	153.082763566676	185.831375042096	537.473633690979	0.00294012829650748	0.001674574379012
Chr3	2504355	2504807	453	LTR/Gypsy	0.192405555555556	452	0.300884955752212	86.8235294117647	Core	1.6375	5.03065184543009	5.03065184543009	5.03065184543009	0	1602.89401560565	185.858383955644	165.456679400447	0.0125391849529781	0
Chr3	2419871	2433541	13671	LTR/Gypsy	0.085338684566787	4413	0.181962383865851	92.3984570002269	Core	1.20575817609042	5.03065184543009	5.03065184543009	5.03065184543009	1126.32329053415	991.307333478712	186.141043433372	44.1957904387679	0.00817757009345794	0.0149253731343284
Chr1	2959625	2967196	7572	LTR/Gypsy	0.0987054302590952	7409	0.219597786475908	91.2221471978393	Core	1.25673440262078	5.03065184543009	5.03065184543009	5.03065184543009	2.6533330676351	1043.42063421003	186.243546142014	45.4596632909332	0.0112781954887218	0.00662251655629139
Chr1	3024854	3025188	335	LTR/Gypsy	0.0947982647058823	334	0.344311377245509	92.7927927927928	Core	1.67	5.03065184543009	5.03065184543009	5.03065184543009	10.0529185795784	2646.52424689975	186.281956805173	212.167454298592	0.00571428571428571	0
Chr1	815425	817287	1863	DNA/Tc1-Mariner	0.00321132904608789	1862	0.547798066595059	99.8925886143931	Core	-0.620148514851485	8.19672385403474	8.02223391865224	7.49334745126233	197.871256082729	139.05488424845	186.303507600638	518.064863585472	0.00308071472581639	0.00364864864864865
Chr8	1448469	1458986	10518	LTR/Gypsy	0.0803667628865979	2905	0.226850258175559	92.7511218501899	Core	1.26351966984671	5.03065184543009	5.03065184543009	5.03065184543009	219.333537480291	923.10373352368	186.84022839603	41.5565741832968	0.0194986072423398	0.0142857142857143
Chr8	3082808	3083052	245	Unspecified	0.350487114624506	244	0.618852459016393	78.2805429864253	Core	-0.136363636363636	5.13283576313994	5.03065184543009	5.16928288619553	0	38.2139315821399	187.298288958553	975.149167291219	0.00144196106705119	0.00308641975308642
Chr6	2166905	2167316	412	LTR/Gypsy	0.257404579439252	411	0.184914841849148	81.4356435643564	Core	1.140625	5.03065184543009	5.03065184543009	5.03065184543009	0	188.454650259404	187.300052762009	73.5754170099858	0.0192307692307692	0
Chr1	3779348	3785778	6431	LTR/Gypsy	0.0755546282527881	6430	0.518662519440124	93.5614939834349	Core	-0.345946568401658	5.03065184543009	5.11186440223292	5.30246363345899	277.015841325835	110.97278089788	187.371853472258	486.935470693406	0.0023157720618642	0.00382937469704314
Chr3	2449363	2456941	7579	LTR/Gypsy	0.112955776231263	7445	0.243116185359302	90.0296416060361	Core	1.31171171171171	5.03065184543009	5.03065184543009	5.03065184543009	3.09269542153851	968.345637682712	187.671751120101	68.3098451515647	0.00836707152496626	0.00790513833992095
Chr2	540994	548565	7572	LTR/Gypsy	0.0966714291476203	7401	0.21429536549115	91.3501824570888	Core	1.26093052691305	5.03065184543009	5.03065184543009	5.03065184543009	2261.52421798098	1059.76096888356	187.706009485769	39.6920012817029	0.00591249507292077	0.00335570469798658
Chr7	1975941	1980919	4979	LTR/Gypsy	0.0931424173080924	4781	0.209788747124033	91.6945606694561	Core	1.26969696969697	5.03065184543009	5.03065184543009	5.03065184543009	1031.79665956548	792.42830521946	187.803062077714	43.3047150813033	0.00627943485086342	0.0258620689655172
Chr8	1503063	1510633	7571	LTR/Gypsy	0.0919998687382802	7430	0.20699865410498	91.8092415465445	Core	1.24583628312442	5.03065184543009	5.03065184543009	5.03065184543009	666.959149900307	978.744066794092	188.055843591402	33.8763810648435	0.0069617105917454	0
Chr8	1444095	1448469	4375	LTR/Gypsy	0.0814580891719745	4374	0.191129401005944	92.8113553113553	Core	1.22481684981685	5.03065184543009	5.03065184543009	5.03065184543009	807.624306147861	898.11255238576	188.265367913415	34.6726377535113	0.00798934753661784	0
Chr3	2383635	2384082	448	Unspecified	0.135885961538462	447	0.217002237136465	91.0514541387025	Core	1.05087719298246	5.03065184543009	5.03065184543009	5.10471848180467	0	1427.58570313849	188.73001488918	48.9475352128623	0	0
Chr7	3160861	3161117	257	DNA/Mite	0.110572972972973	256	0.30078125	90.625	Core	0.94	5.03065184543009	5.10919404715617	5.03065184543009	0	177.268533230535	188.821177612815	465.40817189134	0	0
Chr4	2997068	3001864	4797	LTR/Copia	0.099499540546263	4694	0.263740945888368	91.2561313712945	Core	1.32360444177671	5.03065184543009	5.03065184543009	5.03065184543009	587.841007060204	1205.07524602944	189.140950429838	95.6084702405982	0.0114051094890511	0.00895522388059702
Chr6	2254217	2261787	7571	LTR/Gypsy	0.0870860450160772	7425	0.20983164983165	92.2392886014551	Core	1.2583374758354	5.03065184543009	5.03065184543009	5.03065184543009	1074.29958561528	959.230296198864	189.21668213209	42.0046149116713	0.00783410138248848	0.0229007633587786
Chr8	1485116	1488717	3602	LTR/Gypsy	0.100899286335944	3430	0.190962099125364	91.2763466042154	Core	1.2053725615606	5.03065184543009	5.03065184543009	5.03065184543009	5.57936981166603	1086.43108759995	189.688330831171	33.5176899712158	0.00429184549356223	0
Chr1	3047946	3048978	1033	LTR/Copia	0.0465654826254826	1032	0.211240310077519	95.8333333333333	Core	1.09193374497697	5.03065184543009	5.03065184543009	5.03065184543009	12.9878637710945	1060.08046347897	189.704144244413	54.6679358099109	0.0253164556962025	0
Chr2	607216	612105	4890	LTR/Copia	0.0998311684275948	4788	0.299916457811195	91.3479623824451	Core	1.44612573134385	5.03065184543009	5.03065184543009	5.03065184543009	308.874278035357	1205.58947628612	189.928322705067	126.757802783834	0.00868217054263566	0.0169082125603865
Chr2	548565	551482	2918	LTR/Gypsy	0.103310118662352	2765	0.220976491862568	90.9749909387459	Core	1.23448883666275	5.03065184543009	5.03065184543009	5.10471848180467	5.74009239883336	903.91570239263	190.070400056395	84.6653799630288	0.00745341614906832	0
Chr1	6083522	6083737	216	DNA/Mite	0.0759339449541284	215	0.288372093023256	93.953488372093	Core	0.661490683229814	5.87645332969844	5.89890712842989	5.7304576848602	0	85.9661844752512	190.508576089333	335.712721120945	0.00518134715025907	0
Chr5	1960093	1966075	5983	LTR/Gypsy	0.322558382278906	5982	0.261451019725844	74.3415463041631	Core	1.36578929092298	5.03065184543009	5.03065184543009	5.03065184543009	4.47767515398711	1088.73991674005	190.623903364148	93.7052429522897	0.00876168224299065	0.00638977635782748
Chr8	840158	840297	140	Unspecified	0.20003595890411	139	0.553956834532374	85.6115107913669	Core	-0.818181818181818	5.03065184543009	5.03065184543009	5.15012889933759	0	185.364214475138	191.008411184021	1987.47629606208	0	0.0049813200498132
Chr3	2487893	2495465	7573	LTR/Gypsy	0.107274101977667	7400	0.23972972972973	90.5200433369447	Core	1.28907519536304	5.03065184543009	5.03065184543009	5.03065184543009	840.111159067398	973.186022514327	191.719867688497	55.3098155490642	0.00657276995305164	0.00364963503649635
Chr3	2425183	2432555	7373	LTR/Gypsy	0.0950549979353063	7225	0.215778546712803	91.6158536585366	Core	1.26763112365689	5.03065184543009	5.03065184543009	5.03065184543009	1535.51887124484	1007.29324817935	191.772341174755	42.6483041854683	0.00727272727272727	0.004739336492891
Chr4	2887810	2888445	636	Unspecified	0.106600903614458	635	0.318110236220472	93.7007874015748	Core	1.38421768707483	5.03065184543009	5.03065184543009	5.03065184543009	5.28016070504671	1008.13268990031	191.803777438793	140.236723771316	0.00471698113207547	0.0104166666666667
Chr2	665099	667226	2128	LTR/Gypsy	0.103447824351297	1985	0.191435768261965	91.1290322580645	Core	1.27453815261044	5.03065184543009	5.03065184543009	5.03065184543009	3.14922096613322	640.915779985227	191.928414067616	37.3396060975568	0.0103806228373702	0
Chr5	2368049	2368525	477	LTR/Gypsy	0.051792828685259	476	0.51890756302521	100	Core	-0.378662244333886	5.03065184543009	5.11924851457382	5.03065184543009	0	315.004230776121	192.005676151887	671.003726930682	0.00400228702115495	0.00699300699300699
Chr6	2222547	2230015	7469	LTR/Gypsy	0.0883176277222298	7265	0.199036476256022	92.0715760495526	Core	1.21877324802857	5.03065184543009	5.03065184543009	5.03065184543009	1478.11830205407	845.603273080268	192.060274833128	33.7012572821744	0.0100783874580067	0.00571428571428571
Chr8	2015924	2016182	259	DNA/Mite	0.212339299610895	258	0.461240310077519	84.4897959183673	Core	-0.0688311688311689	5.03065184543009	5.10919404715617	5.17425132346575	0	68.855775847622	192.138110736549	1204.65996107892	0.00573613766730402	0.00357142857142857
Chr2	1574888	1575006	119	Unspecified	0.198147826086957	118	0.576271186440678	85.4545454545455	Core	-0.166666666666667	5.03065184543009	5.03065184543009	5.10018468709118	0	0	192.249149581455	1658.92210485066	0.00294985250737463	0.00417536534446764
Chr2	826989	827224	236	Unspecified	0.258257142857143	235	0.472340425531915	82.3529411764706	Core	0.259259259259259	5.27380527814068	5.41115989562132	5.32430477172126	0	0	192.249149581455	927.84293594408	0.00836120401337793	0.00909090909090909
Chr2	603601	606705	3105	LTR/Gypsy	0.109394018475751	3009	0.239946826188102	90.5427905427905	Core	1.32649265395436	5.03065184543009	5.03065184543009	5.03065184543009	357.094052399895	1143.56199289147	192.547312337614	59.8641849817497	0.0122818358112476	0.00558659217877095
Chr8	1406941	1414511	7571	LTR/Gypsy	0.0876948012397251	7386	0.192526401299756	92.2430160021698	Core	1.20066719618745	5.03065184543009	5.03065184543009	5.03065184543009	2.653683620293	580.274260120011	193.279617024496	30.7299679628457	0.0108892921960073	0.0173160173160173
Chr2	204933	205073	141	Unspecified	0.307081931034483	140	0.478571428571429	79.5454545454545	Core	0.155555555555556	5.54813242376205	5.9306713662063	5.35315680208378	0	1.26048396558436	193.42693495153	699.60721683577	0	0.00277008310249307
Chr3	2407008	2419626	12619	LTR/Gypsy	0.0989412941176471	4720	0.202542372881356	91.437049597287	Core	1.24835053290475	5.03065184543009	5.03065184543009	5.03065184543009	728.055358478794	980.741343397478	193.569319707116	45.2382482706576	0.00715990453460621	0
Chr1	2944970	2954602	9633	LTR/Gypsy	0.101788379746835	3168	0.181818181818182	91.65061014772	Core	1.1934591914569	5.03065184543009	5.03065184543009	5.03065184543009	531.462347131389	888.134044312758	193.736592789511	72.5756559620795	0.00410677618069815	0.0208333333333333
Chr1	3049096	3056665	7570	LTR/Gypsy	0.135637185821697	7412	0.288316243928764	88.1016765819362	Core	1.40568227290916	5.03065184543009	5.03065184543009	5.03065184543009	1331.44052323848	1248.14344781718	193.862432211596	106.887286749617	0.00818732601932209	0.0108055009823183
Chr2	513666	520533	6868	LTR/Gypsy	0.0709179866550624	6867	0.519440803844474	94.0676724769298	Core	-0.354709597965994	5.13283576313994	5.03065184543009	5.03065184543009	301.315223735182	132.974816531861	194.257724092016	536.645569324276	0.00305495486218378	0.00351221105938087
Chr1	3057803	3062860	5058	LTR/Gypsy	0.0892597322677323	5010	0.204790419161677	92.0249096022499	Core	1.23636493432324	5.03065184543009	5.03065184543009	5.03065184543009	3.31054379647905	736.799248536274	194.426615504418	38.859850938376	0.00616740088105727	0.00961538461538462
Chr5	592369	593056	688	Unspecified	0.0502705217391304	687	0.59825327510917	96.1876832844575	Core	-0.973333333333333	6.18995338724916	6.53386085452313	6.65082262354096	0	82.7509560846317	194.427628806965	624.888649916022	0.0027359781121751	0.0031331592689295
Chr4	1039798	1040838	1041	Unspecified	0.0563058024691358	1040	0.639423076923077	95.7651588065448	Core	-0.836756525459991	8.0337118257471	6.16057789803113	5.4721272846246	0	31.1966748556322	194.501346518473	908.828402783168	0.00483800029321214	0.00405432799513481
Chr2	643058	650451	7394	LTR/Gypsy	0.0915356613611416	7255	0.211164713990351	91.7942352778927	Core	1.26662131453632	5.03065184543009	5.03065184543009	5.03065184543009	1203.27805110362	885.706887284625	194.531937556999	35.6540704153825	0.0116033755274262	0.0161290322580645
Chr8	1414511	1421885	7375	LTR/Gypsy	0.0895493244739756	7186	0.190231004731422	92.0100222717149	Core	1.24415811242655	5.03065184543009	5.03065184543009	5.03065184543009	390.926684484832	838.704113699375	194.556561461487	26.3249540577142	0.00771704180064309	0
Chr7	1968569	1975941	7373	LTR/Gypsy	0.0869313924225664	7195	0.201528839471855	92.2798720267075	Core	1.20968889547107	5.03065184543009	5.03065184543009	5.03065184543009	1811.19469344112	805.58263855503	194.65703203529	31.716983794496	0.00969305331179321	0.0100502512562814
Chr2	973009	973176	168	Unspecified	0.239812349726776	167	0.562874251497006	85.0299401197605	Core	0.474025974025974	5.03065184543009	5.31552528806589	5.03065184543009	0	0	194.782553284524	822.533038608782	0	0
Chr3	2472748	2476469	3722	LTR/Gypsy	0.118633123241418	3531	0.211271594449165	89.6708286038592	Core	1.25326278659612	5.03065184543009	5.03065184543009	5.03065184543009	965.590936760911	1028.4007438189	195.095580412582	42.0393777015885	0.00837988826815642	0.0967741935483871
Chr4	3028867	3032851	3985	LTR/Copia	0.0948913296227582	3219	0.25753339546443	91.7108133374883	Core	1.31134453781513	5.03065184543009	5.11924851457382	5.10471848180467	1105.22791398556	1226.31893220335	195.096173415837	99.0556095255151	0.0111275964391691	0.00588235294117647
Chr2	654062	661792	7731	LTR/Gypsy	0.0958044585300067	7378	0.214963404716725	91.4068853347791	Core	1.26508958875572	5.03065184543009	5.03065184543009	5.03065184543009	65.4018508134224	755.392922595201	195.508192722174	40.6215202663048	0.0075187969924812	0.004149377593361
Chr6	2795654	2796024	371	Unspecified	0.36737010178117	370	0.578378378378378	76.9679300291545	Core	-1.55681818181818	5.79708732904075	6.16392767927123	6.67017216341218	3810.30133479631	116.804847477484	195.729269476699	841.169241254516	0.00213827512473272	0.00300978179082017
Chr2	631300	639027	7728	LTR/Gypsy	0.111535018812147	7404	0.185980551053485	90.1040962552386	Core	1.16992759580311	5.03065184543009	5.03065184543009	5.03065184543009	2058.57514692405	867.192085336331	195.81155823616	30.0541298858351	0.0111464968152866	0.0172413793103448
Chr3	2401440	2405849	4410	LTR/Gypsy	0.0894299819413093	4409	0.195509185756407	92.0108942351339	Core	1.24838123845794	5.03065184543009	5.03065184543009	5.03065184543009	2.2783270555805	833.267974994775	196.019348722433	29.7149737363021	0.0082135523613963	0.015625
Chr5	1943779	1947845	4067	LTR/Gypsy	0.116145125430398	4066	0.217166748647319	90.0347912524851	Core	1.19681033595278	5.03065184543009	5.03065184543009	5.03065184543009	1073.05075492263	783.713115012212	196.218500392405	41.2054724252856	0.0101371496720334	0.00704225352112676
Chr5	1957700	1970922	13223	LTR/Gypsy	0.0951527449078565	6168	0.217088197146563	91.5582303188029	Core	1.25121396593789	5.03065184543009	5.03065184543009	5.03065184543009	3.79807339119539	956.609702196755	196.35624217138	73.0433697287521	0.00921658986175115	0.00884955752212389
Chr4	2891397	2897924	6528	LTR/Gypsy	0.306957557940582	6427	0.324412634199471	75.8143969489909	Core	1.39163483096519	5.03065184543009	5.03065184543009	5.03065184543009	28.7261455212961	1071.99680238932	196.380998367125	181.369212108547	0.0149380616954093	0.00420489296636086
Chr7	2745700	2745904	205	DNA/Mite	0.16280572815534	204	0.480392156862745	87.0646766169154	Core	0.395604395604396	5.74272028462249	5.91663983992423	5.84935140349167	0	5.17854003594758	196.503431486063	559.207505742218	0	0.00602409638554217
Chr1	3766520	3772481	5962	LTR/Gypsy	0.0693365886287625	5961	0.520550243247777	93.893001345895	Core	-0.371458106436786	5.03065184543009	5.11186440223292	5.30246363345899	359.476175785194	109.592736089613	196.573293821268	511.334204431065	0.00243249817562637	0.00328113348247576
Chr2	619646	624035	4390	LTR/Gypsy	0.0916296914700545	4389	0.183868762816131	91.85303514377	Core	1.18223564194502	5.03065184543009	5.03065184543009	5.03065184543009	20.5984026775273	819.29762946348	196.672498345202	21.2571109872383	0.00940070505287897	0
Chr8	3083262	3084611	1350	Unspecified	0.291929263157895	1349	0.601927353595256	77.4068322981366	Core	-1.09062937062937	6.0000749184655	5.03065184543009	5.37641342672313	0	36.5231774567949	196.976715545349	755.855840431241	0.00307692307692308	0.00270743749004619
Chr5	1957362	1972611	15250	LTR/Gypsy	0.0642184827586207	726	0.254820936639118	94.4444444444444	Core	1.26754385964912	5.03065184543009	5.03065184543009	5.03065184543009	3.73226469563179	970.281505511581	197.10594884325	74.2923476245934	0	0
Chr4	2900877	2901515	639	Unspecified	0.102063042168675	638	0.316614420062696	93.730407523511	Core	1.40232683982684	5.03065184543009	5.03065184543009	5.03065184543009	15.7658801585539	1881.621573611	197.521288249824	137.706943222234	0.00656814449917898	0
Chr6	2330754	2332880	2127	LTR/Gypsy	0.111575968342644	2126	0.163687676387582	90.9133932796971	Core	1.17183098591549	5.03065184543009	5.03065184543009	5.03065184543009	357.604785105371	317.351899722944	198.055497977822	22.4143066061381	0.0218120805369128	0.0232558139534884
Chr3	3886704	3886870	167	Unspecified	0.298019759036145	166	0.542168674698795	79.2207792207792	Core	0.277777777777778	5.03065184543009	5.03065184543009	5.03065184543009	0	0	198.093086798846	981.474940783926	0.00515463917525773	0.00716845878136201
Chr3	2858221	2858428	208	Unspecified	0.1663721875	207	0.555555555555556	90.8212560386473	Core	-0.505681818181818	5.03065184543009	5.18721850054736	5.43934364119169	0	1.7010414681187	198.760014667023	897.887019285124	0.00578034682080925	0
Chr5	1966075	1966554	480	LTR/Gypsy	0.281463571428571	479	0.306889352818372	79.2887029288703	Core	1.25857200484066	5.03065184543009	5.03065184543009	5.03065184543009	0	1141.04651735588	198.888507143328	119.57422980262	0.00642398286937901	0
Chr5	3401305	3414681	13377	LTR/Copia	0.133369929718876	969	0.272445820433437	90.1554404145078	Core	1.45860805860806	5.53042499490293	5.79512086219606	5.61232066034614	600.444479021464	113.350917221234	199.022338662153	640.532452833103	0.0151515151515152	0
Chr8	1511164	1511323	160	LTR/Copia	0.194204261363636	159	0.471698113207547	89.937106918239	Core	1.50769230769231	5.03065184543009	5.03065184543009	5.03065184543009	0	1336.23266971869	199.083956669522	205.996462348078	0	0
Chr1	742192	749021	6830	LTR/Gypsy	0.0646667899796097	6829	0.521599062820325	94.3980055726646	Core	-0.328325566184286	8.56042431239865	8.92345839942959	9.20887236037098	277.98793349865	128.01831811625	199.122072516741	565.268044029407	0.00296745798879701	0.00285438610597411
Chr6	2288438	2295305	6868	LTR/Gypsy	0.070442651581085	6867	0.519003931847969	94.1116156437674	Core	-0.358218789947418	5.03065184543009	5.03065184543009	5.03065184543009	265.722972387823	129.37676450135	199.146159573119	537.165854805685	0.00244565217391304	0.00362232306345036
Chr3	2771545	2778466	6922	LTR/Gypsy	0.072005052540665	6921	0.516543852044502	94.035496072156	Core	-0.331095192613817	5.17489244698057	5.03065184543009	5.2277855635108	315.895533556467	124.240184950581	199.166568121817	514.906207378391	0.00293850136430421	0.00365008407497027
Chr8	919092	919295	204	LTR/Gypsy	0.519299191919192	203	0.487684729064039	63.8297872340426	Core	-0.4325	5.03065184543009	5.25632077427365	5.03065184543009	0	0	199.21609934777	685.76774491655	0.00481540930979133	0.00244498777506112
Chr8	2003322	2003898	577	DNA/Mite	0.159057469635628	487	0.498973305954825	86.652977412731	Core	0.4	5.27532803997757	5.85562520864476	5.3246190855429	0	79.5288657172784	199.25997454717	725.500753862082	0.0134755755193711	0.0172043010752688
Chr2	500822	507702	6881	LTR/Gypsy	0.0713818760856977	6880	0.518895348837209	94.0350877192982	Core	-0.353874139626352	5.13283576313994	5.14536808661724	5.03065184543009	272.033818117864	125.311785780467	199.433995177287	533.381101683474	0.00385528897456198	0.00330538535956143
Chr3	1737172	1737667	496	LTR/Gypsy	0.0618202702702703	495	0.513131313131313	99.1836734693878	Core	-0.277319086935405	5.03065184543009	5.03065184543009	5.03065184543009	0	450.076978083788	199.561257449993	635.554109591639	0.00849707912904939	0.0025062656641604
Chr5	1986794	1988346	1553	LTR/Copia	0.113835681063123	1497	0.295925183700735	89.8463593854376	Core	1.4	5.03065184543009	5.03065184543009	5.03065184543009	802.911245624666	1415.66571430158	199.860561149145	140.495865271792	0.00693842150910668	0.00632911392405063
Chr7	853	7720	6868	LTR/Gypsy	0.0713933217290398	6867	0.519586427843309	94.0237293100923	Core	-0.359096706826248	5.27532803997757	5.03065184543009	5.09975004453444	393.465025168758	123.303456818643	199.990758373519	546.762231462782	0.00322680306203014	0.00267657398529882
Chr4	605609	605820	212	Unspecified	0.160570131004367	211	0.578199052132701	92.7884615384615	Core	0.378787878787879	5.27380527814068	5.45595786260369	5.22822020606754	0	478.899874657685	199.994902148297	782.499453839285	0.00121802679658952	0.00163934426229508
Chr5	1171037	1172899	1863	DNA/Tc1-Mariner	0.00321132904608789	1862	0.547798066595059	99.8925886143931	Core	-0.620148514851485	8.18216015101076	8.02781200602521	7.54723419622108	187.078278478216	144.327107347918	200.278631333478	523.183660096814	0.00275458379960403	0.00273635244219455
Chr6	3220160	3220310	151	LTR/Copia	0.271022098765432	150	0.526666666666667	81.8791946308725	Core	-0.587719298245614	5.03065184543009	5.03065184543009	5.03065184543009	0	0	200.494734960945	903.059626476327	0	0.00204081632653061
Chr6	2944834	2944975	142	LTR/Gypsy	0.421604881889764	141	0.50354609929078	70.3389830508475	Core	-1.27564102564103	5.03065184543009	5.03065184543009	5.03065184543009	0	317.876049206582	200.831700902056	1576.33947947334	0.00307692307692308	0
Chr7	2009648	2012560	2913	LTR/Gypsy	0.0958783818181818	2193	0.181486548107615	91.6590284142988	Core	1.2308323860048	5.03065184543009	5.03065184543009	5.03065184543009	0	817.47343100611	200.961058318473	36.9513306332583	0.0121212121212121	0
Chr2	694216	694456	241	Unspecified	0.290925528455285	240	0.404166666666667	77.9661016949153	Core	-0.0779220779220779	5.90376780867843	5.20046107137664	5.3026420836662	0	68.9099727796037	201.461925904887	1046.27451077292	0	0.00389105058365759
Chr1	4265812	4272641	6830	LTR/Gypsy	0.0645078852315759	6829	0.521745497144531	94.4126704795425	Core	-0.334772630684233	8.86350800441381	9.171159127433	9.46661891757951	273.575426617719	132.431858047297	201.567024938751	548.642513322659	0.00344769874476987	0.00308253903873454
Chr8	1556319	1559820	3502	LTR/Gypsy	0.0811032129655957	3501	0.156241073978863	92.7142857142857	Core	1.10949417904456	5.03065184543009	5.03065184543009	5.03065184543009	9.56463396285605	361.828044671681	201.735443556115	14.9695547690994	0.00898876404494382	0.03125
Chr7	1464813	1465003	191	Unspecified	0.209866666666667	190	0.542105263157895	89.6739130434783	Core	-0.333333333333333	5.37424087113768	6.06124267966322	5.65812217482393	0	0	201.761477295121	606.930601609107	0.00232018561484919	0.0018796992481203
Chr8	1316816	1317066	251	DNA/Mite	0.208455598455598	250	0.448	84	Core	0.189083820662768	5.03065184543009	5.10919404715617	5.13529487615267	0	4.92550561652042	201.839892171645	773.117294041201	0	0.00436681222707424
Chr2	357613	364560	6948	LTR/Gypsy	0.0692045903045903	6947	0.517345616813013	94.1023792357606	Core	-0.275312720508051	8.5435619497059	8.8922094080844	9.08434264479679	297.362900126514	125.187688892331	201.988232436188	559.436643460799	0.00317310288954901	0.00278158510037894
Chr4	3459673	3460007	335	DNA/Mite	0.212869671641791	334	0.431137724550898	84.1121495327103	Core	0.115384615384615	5.55759304217616	6.0145500496526	5.47842728560663	0	0.526147961610289	202.113284578983	564.985243469284	0.0359550561797753	0.00810372771474878
Chr3	2512938	2520113	7176	LTR/Gypsy	0.116422956323801	6998	0.240068591026007	89.7935779816514	Core	1.30963646098539	5.03065184543009	5.03065184543009	5.03065184543009	589.356905949333	972.236724260768	202.157934778587	55.7148665886183	0.00624311421226588	0.00738007380073801
Chr1	2938241	2943174	4934	LTR/Copia	0.0828278031990281	4923	0.235628681698152	92.442096708655	Core	1.30350753099775	5.03065184543009	5.03065184543009	5.10018468709118	3579.7562514266	1108.93555926312	202.307805759659	58.7493125215797	0.00407608695652174	0.00769230769230769
Chr3	2510128	2512938	2811	LTR/Gypsy	0.151698469387755	2810	0.249110320284698	88.4936479128857	Core	1.34163173652695	5.03065184543009	5.03065184543009	5.03065184543009	3092.58768129726	989.618570707243	202.315238742468	66.5536938543327	0.0103626943005181	0
Chr5	2007103	2013970	6868	LTR/Gypsy	0.0706010966057441	6867	0.518858307849134	94.0969679214882	Core	-0.354465721529977	5.03065184543009	5.22281708988933	5.17425132346575	322.768087560988	125.395940978231	202.345397453422	545.143565520621	0.0033544539694372	0.00346627355671541
Chr4	408727	408906	180	Unspecified	0.190754126984127	179	0.497206703910615	87.5706214689266	Core	-0.0909090909090909	5.20137806908234	5.10919404715617	5.3651771001223	0	0.98431051245071	202.383069378125	657.816875174289	0	0
Chr4	3015887	3017960	2074	LTR/Gypsy	0.139384782608696	1973	0.234161175874303	88.8888888888889	Core	1.22938890851289	5.03065184543009	5.03065184543009	5.03065184543009	1820.83487772614	1168.69676422754	202.443103907605	78.1579948018088	0.0109034267912773	0.00625
Chr1	9196679	9197155	477	LTR/Gypsy	0.051792828685259	476	0.51890756302521	100	Core	-0.378662244333886	5.03065184543009	5.03065184543009	5.03065184543009	0	225.37187939603	202.734317015865	730.332823583333	0.00578034682080925	0.00349243306169965
Chr1	3026424	3039826	13403	LTR/Gypsy	0.0960790370578327	3543	0.208015805814282	91.5465083404015	Core	1.22687338501292	5.03065184543009	5.03065184543009	5.03065184543009	314.503093480525	1242.66289883506	202.793035791658	89.7742376575192	0.00519031141868512	0.0192307692307692
Chr2	2674282	2681152	6871	LTR/Gypsy	0.0704314256707759	6870	0.51863173216885	94.1124780316345	Core	-0.358459638265303	5.68575330548616	5.39616592543363	5.836074474642	252.935763481264	121.566145671355	202.819844105046	520.000465182769	0.00320851844016642	0.00380243683048491
Chr5	1931206	1949790	18585	LTR/Gypsy	0.148773011976048	3405	0.272540381791483	87.7513711151737	Core	1.28996010638298	5.03065184543009	5.03065184543009	5.03065184543009	986.110004274654	1139.7005297647	203.094475339788	106.476148301829	0.0146500271296799	0.0103806228373702
Chr5	3569460	3576328	6869	LTR/Gypsy	0.0715643342036554	6868	0.519656377402446	93.9953134153486	Core	-0.362361718549009	6.06613248866272	5.22281708988933	5.2433495225701	401.695126676523	115.886329672943	203.109226562133	537.492238122259	0.00313458027625642	0.00454768928220256
Chr3	149892	156721	6830	LTR/Gypsy	0.0673483076026799	6829	0.520574022550886	94.1487021557413	Core	-0.341798408272651	8.86522877805913	9.17528491875824	9.38869465851558	327.015787731216	128.711141244961	203.265623463515	559.571183857165	0.00299983517389154	0.00326771339762493
Chr1	605805	612633	6829	LTR/Gypsy	0.0646550043693562	6828	0.521675454012888	94.4118509826929	Core	-0.334772630684233	8.86350800441381	9.171159127433	9.46661891757951	261.847090619276	140.022099275777	203.295397247529	565.932240334108	0.00304919830067151	0.00285546317292349
Chr7	3117249	3117358	110	DNA/Mite	0.0913728571428571	109	0.513761467889908	94.4444444444444	Core	0.142857142857143	5.41629755497831	5.26672321719341	5.35302093846935	0	178.451850312823	203.388585982985	1168.70892662792	0.00636942675159236	0
Chr1	6504134	6504351	218	DNA/Mite	0.244336055045872	217	0.244239631336406	82.1256038647343	Core	1.25760649087221	5.03065184543009	5.03065184543009	5.03065184543009	0	0.811144774149196	203.388585982985	198.460006408514	0.0151515151515152	0.0185185185185185
Chr2	572588	580158	7571	LTR/Gypsy	0.100145451843847	7367	0.220849735306095	91.1848728064209	Core	1.27034092264972	5.03065184543009	5.03065184543009	5.03065184543009	194.161184884771	989.970850588499	203.425345870107	45.885191070802	0.00759696121551379	0.00579710144927536
Chr5	2201594	2202070	477	LTR/Gypsy	0.051792828685259	476	0.51890756302521	100	Core	-0.378662244333886	5.03065184543009	5.03065184543009	5.03065184543009	0	308.364797340558	203.474223282346	714.456023070652	0.00178147268408551	0.00204778156996587
Chr4	2948885	2953002	4118	LTR/Gypsy	0.121402317380353	3939	0.230769230769231	89.9488491048593	Core	1.28922935887183	5.03065184543009	5.03065184543009	5.03065184543009	2.43995764358573	992.372962551964	203.606798809929	66.9248029385369	0.0115424973767051	0
Chr1	2264163	2264290	128	Unspecified	0.0860362595419847	127	0.519685039370079	94.488188976378	Core	0.619047619047619	5.61670632865606	5.65259579439315	5.40950345593699	0	0	203.621030081251	806.440660961582	0	0.003003003003003
Chr2	658711	658863	153	LTR/Copia	0.142222545454545	152	0.519736842105263	93.4210526315789	Core	0.952380952380952	5.03065184543009	5.03065184543009	5.03065184543009	0	408.430195153057	203.657974838591	186.631264304696	0	0
Chr6	2271885	2276534	4650	LTR/Gypsy	0.10323509054326	4466	0.21115091804747	91.3722826086957	Core	1.27265576854465	5.03065184543009	5.03065184543009	5.03065184543009	74.183531489019	730.570594544252	203.818467538212	34.8415157550232	0.0101483216237315	0.0065359477124183
Chr6	2310107	2317678	7572	LTR/Gypsy	0.0875000589654248	7424	0.202720905172414	92.2464940668824	Core	1.22384428223844	5.03065184543009	5.03065184543009	5.03065184543009	1450.04652146258	831.297167803593	203.955602194159	35.8643710392137	0.00807319698600646	0
Chr2	650451	663239	12789	LTR/Gypsy	0.0932238949671772	5009	0.218207226991415	91.5701158609668	Core	1.32236709491932	5.03065184543009	5.03065184543009	5.10018468709118	825.713570938984	756.80169008257	203.996445387218	43.984958016871	0.0115606936416185	0
Chr1	2956861	2974263	17403	LTR/Gypsy	0.0998024556755655	9776	0.227189034369885	91.0683191641913	Core	1.26553191489362	5.03065184543009	5.03065184543009	5.03065184543009	192.958149109857	1089.36412202896	204.317200222349	51.2088632132768	0.00945179584120983	0.00245700245700246
Chr7	3071239	3078106	6868	LTR/Gypsy	0.070442651581085	6867	0.519003931847969	94.1116156437674	Core	-0.358218789947418	5.13283576313994	5.03065184543009	5.03065184543009	292.05148708313	142.646176245078	204.341721890732	522.308813836565	0.0029497489201812	0.00346677672307057
Chr4	3001864	3008673	6810	LTR/Gypsy	0.336317457004263	6809	0.235129975033045	73.4047300312361	Core	1.20111577074597	5.03065184543009	5.03065184543009	5.03065184543009	966.22752760785	1048.64434198701	204.353188019445	71.4199494272709	0.0102932002495321	0.00510204081632653
Chr5	1975896	1979233	3338	LTR/Copia	0.0900397714285714	3289	0.296442687747036	92.4551262549437	Core	1.36206578676239	5.13159268805071	5.38143945838056	5.32585612171277	3.01045133722987	1312.11128800809	204.383580504341	130.283997012784	0.0103542234332425	0.0273972602739726
Chr6	552101	558939	6839	LTR/Gypsy	0.0650305964503928	6838	0.521205030710734	94.4021101992966	Core	-0.331865038378192	8.86350800441381	9.17106935608686	9.44721508588075	238.940980087145	131.155596619079	204.385984331798	555.525464771998	0.00408190578158458	0.00363374995008585
Chr2	606705	619584	12880	LTR/Gypsy	0.0953906528189911	7393	0.2007304206682	91.5196743554953	Core	1.21941504997061	5.03065184543009	5.03065184543009	5.03065184543009	730.976296493471	1070.6309825919	204.410740765157	77.053892843809	0.0118203309692671	0
Chr8	1510650	1511171	522	LTR/Gypsy	0.0753688952380952	521	0.170825335892514	93.4740882917466	Core	1.20173646578141	5.03065184543009	5.03065184543009	5.03065184543009	0	1309.67435234129	204.452464740434	32.0589241121446	0	0
Chr1	3728926	3734909	5984	LTR/Gypsy	0.0793429033333333	5983	0.521644659869631	93.1138730265368	Core	-0.380530851998243	5.03065184543009	5.03065184543009	5.03065184543009	366.548367767427	101.955284370392	204.486925147411	525.710006945724	0.00319192369075456	0.00402356660439718
Chr8	1421886	1423475	1590	LTR/Gypsy	0.0899291228070175	1589	0.204531151667716	91.881686595343	Core	1.23386243386243	5.03065184543009	5.03065184543009	5.03065184543009	252.968908337502	1038.44511126393	204.499282341703	38.2422934263258	0.0062111801242236	0
Chr6	2230015	2231801	1787	LTR/Gypsy	0.116635490543735	1683	0.216280451574569	89.9701492537313	Core	1.22047008034537	5.03065184543009	5.03065184543009	5.03065184543009	1.87541842408942	1025.33061911748	204.671130478125	40.0255475109609	0.00972762645914397	0
Chr8	1524574	1530203	5630	LTR/Gypsy	0.0930199821842152	5578	0.199713158838293	92.0640633435307	Core	1.23843167701863	5.03065184543009	5.03065184543009	5.03065184543009	1.18963108990747	986.054567964242	204.703456329894	33.5703493427338	0.00683371298405467	0
Chr2	3654489	3661363	6875	LTR/Gypsy	0.0661983796296296	6874	0.519784695955775	94.3148688046647	Core	-0.314851154718996	5.03065184543009	5.03065184543009	5.03065184543009	311.723848054671	124.019114573977	204.721664554404	563.992557132417	0.00325263228489035	0.00292205119762943
Chr6	3076870	3083737	6868	LTR/Gypsy	0.0702941093704671	6867	0.518858307849134	94.1262633660466	Core	-0.354146624319658	5.03065184543009	5.17098487894368	5.03065184543009	346.171211734595	146.397336872632	204.725630436368	550.115182342972	0.00307604263538164	0.00233823654451152
Chr8	741238	747199	5962	LTR/Gypsy	0.0648618514801806	5961	0.521389028686462	94.2492012779553	Core	-0.378388655481669	5.13283576313994	5.11186440223292	5.85850655038483	310.04820161473	114.35508138106	204.740505818942	519.792063764582	0.00334535181949968	0.00322686246083337
Chr1	3039887	3047449	7563	LTR/Gypsy	0.0936876781857451	7372	0.213917525773196	91.6508281292425	Core	1.20334704230026	5.03065184543009	5.03065184543009	5.03065184543009	591.512080549066	877.704776068907	204.802649094736	38.0068892050693	0.00802407221664995	0.00823045267489712
Chr4	2897924	2900840	2917	LTR/Copia	0.0462710892480675	2823	0.227771873893022	96.2792345854004	Core	1.32219309742246	5.03065184543009	5.03065184543009	5.03065184543009	4.59364924459639	891.303130314038	204.965458038976	67.8100056201991	0.020997375328084	0
Chr4	2993089	2994951	1863	DNA/Tc1-Mariner	0.00321132904608789	1862	0.547798066595059	99.8925886143931	Core	-0.620148514851485	5.03065184543009	5.03065184543009	5.03065184543009	174.486471272952	217.761643376213	205.094383430606	486.498951765525	0.00304962572775159	0.00235066371681416
Chr8	1438080	1444095	6016	LTR/Gypsy	0.0906507178260127	5821	0.204432228139495	91.9058257432549	Core	1.29080746598324	5.03065184543009	5.03065184543009	5.03065184543009	1501.25311427302	922.882596871902	205.181273406627	41.5135829833574	0.00868809730668984	0
Chr6	2276534	2282977	6444	LTR/Gypsy	0.0943714014852267	6297	0.233444497379705	91.5647339158062	Core	1.31735871065022	5.03065184543009	5.03065184543009	5.03065184543009	141.34634480967	873.778951003369	205.679470149226	61.5527930462918	0.0134758364312268	0.0112359550561798
Chr1	3755121	3761516	6396	LTR/Gypsy	0.0643998444548141	6395	0.520562939796716	94.4096461008456	Core	-0.340270748987854	5.03065184543009	5.03065184543009	5.03065184543009	289.526885128368	125.06193084624	205.766902810757	552.671078215516	0.00356371490280778	0.00361520148135085
Chr1	2947383	2952583	5201	LTR/Copia	0.0641537656157049	5058	0.221233689205219	94.5243804956035	Core	1.22379532316126	5.03065184543009	5.03065184543009	5.03065184543009	981.299433696367	875.261251784541	205.81000162407	103.906162231963	0.00672947510094213	0.0127659574468085
Chr1	2952583	2953220	638	Unspecified	0.147405602409639	637	0.222919937205651	89.7798742138365	Core	1.12051549982584	5.03065184543009	5.03065184543009	5.03065184543009	10.5271128522	1115.70667991465	205.844599096742	51.7993098487632	0	0
Chr3	2386880	2388468	1589	LTR/Copia	0.0867060480207657	1533	0.206784083496412	92.2374429223744	Core	1.22855239047143	5.03065184543009	5.03065184543009	5.03065184543009	4.21880515059813	689.568126034373	205.846166023823	47.2702472731055	0.00476190476190476	0
Chr2	73	1490	1418	DNA/Tc1-Mariner	0.00422095003518649	1417	0.551164431898377	99.8588567395907	Core	-0.558441558441558	8.17997675516341	8.01471673898392	7.49165648597592	248.234673824124	141.056701402894	205.884405241488	509.604931709999	0.00168634064080944	0.00234657039711191
Chr2	571432	582124	10693	LTR/Gypsy	0.0899092245989305	2977	0.219012428619416	92.1832884097035	Core	1.29065200314218	5.03065184543009	5.03065184543009	5.03065184543009	138.401353854067	1047.88402664266	205.889594033464	45.108765837872	0.0194319880418535	0.0212765957446809
Chr7	2010175	2010814	640	Unspecified	0.119473328335832	639	0.311424100156495	92.3317683881064	Core	1.40592515592516	5.03065184543009	5.03065184543009	5.03065184543009	0	1400.28507199301	206.025624201247	78.3885918729555	0.00479616306954436	0
Chr4	2325098	2330021	4924	LTR/Gypsy	0.147635405405405	4923	0.517164330692667	89.628681177977	Core	-0.412840199954259	5.1295646765902	5.10919404715617	5.30060340585908	276.814731411793	135.232105516141	206.074869038162	529.979342591124	0.00278360865200329	0.00293624161073825
Chr1	9190696	9196679	5984	LTR/Gypsy	0.0793429033333333	5983	0.521644659869631	93.1138730265368	Core	-0.380530851998243	5.03065184543009	5.03065184543009	5.03065184543009	352.557972051113	106.114333603542	206.102609802361	527.567873939852	0.0032472436187887	0.00315638450502152
Chr6	2184298	2189534	5237	LTR/Gypsy	0.087160512926577	4960	0.184072580645161	92.2980849292256	Core	1.18840620433854	5.03065184543009	5.03065184543009	5.03065184543009	3637.94095800207	927.209597282585	206.240921499418	35.7872485290616	0.00888450148075025	0.0277777777777778
Chr6	3445502	3451485	5984	LTR/Gypsy	0.0793429033333333	5983	0.521644659869631	93.1138730265368	Core	-0.37921332894159	5.1295646765902	5.38143945838056	6.59872320438753	333.531033876926	99.3485563298963	206.308242394809	534.136760811949	0.00339988425925926	0.00397940074906367
Chr3	2953025	2953364	340	LTR/Gypsy	0.503663855421687	339	0.51622418879056	65.1612903225806	Core	-0.768018018018018	5.03065184543009	5.03065184543009	5.03065184543009	0	0	206.402106807253	412.186167156145	0.00275671950379049	0.00380807311500381
Chr2	1565475	1567337	1863	DNA/Tc1-Mariner	0.00321132904608789	1862	0.547798066595059	99.8925886143931	Core	-0.620148514851485	8.35168701587176	8.30661431967447	7.54902188582744	154.699345664679	133.029486420488	206.510781106231	517.211730833581	0.00310366232153942	0.00299931833674165
Chr4	3019810	3028811	9002	LTR/Copia	0.106822315202232	1430	0.216783216783217	90.5898876404494	Core	1.24034831323834	5.03065184543009	5.03065184543009	5.03065184543009	2.23174792466641	1079.8997498785	206.831547966505	72.0630334381139	0.00232018561484919	0.0222222222222222
Chr7	1955689	1961004	5316	LTR/Gypsy	0.399309274040289	5315	0.183443085606773	69.6711798839458	Core	1.20630386952221	5.1295646765902	5.03065184543009	5.03065184543009	2323.3025064461	855.528466977539	206.878571836254	26.7401890456335	0.00814663951120163	0.0158730158730159
Chr5	2289392	2289645	254	DNA/Mite	0.16618888030888	253	0.466403162055336	89.344262295082	Core	-0.393939393939394	5.03065184543009	5.11186440223292	5.03065184543009	0	2.08580084781222	207.107691555245	853.6930434398	0.00127551020408163	0.00313971742543171
Chr6	413154	413261	108	Unspecified	0.257816551724138	107	0.560747663551402	84.6153846153846	Core	0.5	5.49046064441933	5.99010244576926	5.12828776107532	0	0	207.22610647323	1048.4679583846	0.00314465408805031	0.00540540540540541
Chr5	1936600	1943779	7180	LTR/Gypsy	0.16493990108945	6964	0.320218265364733	85.6895306859206	Core	1.41345766737791	5.03065184543009	5.03065184543009	5.03065184543009	1942.44151007988	1268.48306917872	207.284307619879	159.254616454868	0.00853537852548244	0.00615384615384615
Chr1	3092457	3092913	457	Unspecified	0.169362683438155	456	0.368421052631579	88.1318681318681	Core	0.704357418643133	6.00137088606338	5.14160453308651	5.19799905294362	0	1003.87990343011	207.397352662315	192.789720511128	0.0226537216828479	0.0111731843575419
Chr6	433688	439671	5984	LTR/Gypsy	0.0791642833333333	5983	0.521477519638977	93.1306684581794	Core	-0.384302161032037	5.1295646765902	5.38143945838056	6.59506530200061	353.117587879766	102.043151607712	207.453909695592	521.39710142364	0.00313780501310495	0.00261767645519014
Chr4	3983983	3990862	6880	LTR/Gypsy	0.0720027446438911	6879	0.519406890536415	93.9903494662962	Core	-0.349690075832509	5.65212252610921	6.26488382002539	5.70845158752773	398.619122630515	115.6500452634	207.485455459057	536.978877473459	0.00308197380322267	0.00365724173188092
Chr4	3052253	3052590	338	LTR/Copia	0.105316918767507	337	0.270029673590504	94.9554896142433	Core	1.63311688311688	5.03065184543009	5.03065184543009	5.03065184543009	0	1913.20082765576	207.630690776344	87.4169075847028	0	0
Chr8	1502298	1503037	740	LTR/Gypsy	0.155011451398136	739	0.267929634641407	89.0277777777778	Core	1.05280528052805	5.03065184543009	5.03065184543009	5.03065184543009	0	1150.95508246106	207.634942802532	99.4989192021007	0.00826446280991736	0.0166666666666667
Chr4	2941268	2948837	7570	LTR/Gypsy	0.144965580013504	7366	0.302063535161553	87.289287656335	Core	1.40699804755409	5.03065184543009	5.03065184543009	5.03065184543009	607.773846820491	1171.35136026112	207.701455998649	131.012974632259	0.00903954802259887	0.0152979066022544
Chr8	2923449	2930277	6829	LTR/Gypsy	0.067653891639965	6828	0.520064440538957	94.1331768847169	Core	-0.33423755676796	8.87251846960969	9.17701437281572	9.49570872181071	293.229513465032	118.361789197193	208.083057906942	565.350842922629	0.0036406941136441	0.00320525824643973
Chr4	2993011	2996969	3959	LTR/Copia	0.101239312901631	2009	0.266799402687904	92.1331316187594	Core	1.29755775577558	5.03065184543009	5.03065184543009	5.03065184543009	148.04999500251	692.327746458659	208.10214344798	277.854039803682	0.0124333925399645	0.075
Chr6	2218936	2221845	2910	LTR/Gypsy	0.109780725584594	2909	0.188037126160192	90.896407394489	Core	1.26589300411523	5.03065184543009	5.03065184543009	5.03065184543009	242.898286849009	905.920402340846	208.117720312361	29.6188592782996	0.00495867768595041	0
Chr1	7510620	7516603	5984	LTR/Gypsy	0.0791642833333333	5983	0.521477519638977	93.1306684581794	Core	-0.384302161032037	5.1295646765902	5.38143945838056	6.59506530200061	346.961813764587	102.716800427166	208.247063980749	529.425740933981	0.00254046599404805	0.00236049475970163
Chr8	1309552	1310028	477	LTR/Gypsy	0.051792828685259	476	0.51890756302521	100	Core	-0.378662244333886	5.03065184543009	5.03065184543009	5.03065184543009	0	433.776317790068	208.283614014474	546.496186068078	0.00343347639484979	0.00281425891181989
Chr1	325496	325621	126	Unspecified	0.104350775193798	125	0.568	92.8	Core	-0.0375939849624061	5.20137806908234	5.35853261984919	5.10018468709118	0	2.82592372929397	208.322399423604	1341.20552718012	0.0045662100456621	0.0021551724137931
Chr3	2407960	2415514	7555	LTR/Gypsy	0.0899617128632939	7394	0.228022721125237	92.0379146919431	Core	1.2864202979621	5.03065184543009	5.03065184543009	5.03065184543009	448.092907156972	1054.97835133626	208.416401376346	51.2375231691517	0.00991806813281587	0.00393700787401575
Chr1	8187807	8187915	109	Unspecified	0.18205	108	0.555555555555556	87.6190476190476	Core	2.9	5.03065184543009	5.03065184543009	5.03065184543009	0	1.63745113286193	208.574044511598	1739.77089730081	0.00452488687782805	0.0033003300330033
Chr5	2195611	2201594	5984	LTR/Gypsy	0.0793429033333333	5983	0.521644659869631	93.1138730265368	Core	-0.380530851998243	5.03065184543009	5.03065184543009	5.03065184543009	351.438740393808	105.294239388555	208.717081334916	523.254968417768	0.00260923891073463	0.00333127111787941
Chr6	3481516	3488381	6866	LTR/Gypsy	0.070306659895531	6865	0.518863801893664	94.1245421245421	Core	-0.354214904382129	5.03065184543009	5.11186440223292	5.03065184543009	354.07539189419	121.19523947183	208.779094660436	542.17978440741	0.00320045517584723	0.00387403149212697
Chr6	2850710	2850950	241	Unspecified	0.201520241935484	240	0.441666666666667	85.2320675105485	Core	-0.0644444444444445	5.50383599528772	6.35569216465325	5.34340494029961	0	0.733084816804294	208.814550937912	812.108310742791	0.00268817204301075	0.0013531799729364
Chr3	2529505	2537075	7571	LTR/Gypsy	0.0976508716642081	7415	0.222791638570465	91.3372014572932	Core	1.29787628822257	5.03065184543009	5.03065184543009	5.03065184543009	16.3643823251401	667.218177505154	208.858070240525	44.888826921836	0.0126441056154704	0.025
Chr5	1564008	1564245	238	Unspecified	0.259610573770492	237	0.413502109704641	80.3418803418803	Core	-0.562962962962963	5.23050551921081	5.70759294194248	5.42547349454417	0	418.715682059117	209.235146013953	903.16121560485	0	0.00530973451327434
Chr7	671482	671614	133	Unspecified	0.0921137777777778	132	0.477272727272727	93.1818181818182	Core	0.0555555555555556	5.8840502696364	5.77085181768911	6.10259417842972	0	0	209.263566207104	993.814993923553	0.00471698113207547	0
Chr8	1166981	1167238	258	DNA/Mite	0.0892475675675676	257	0.330739299610895	92.2178988326848	Core	0.564102564102564	5.1295646765902	5.03065184543009	5.03065184543009	0	275.814571484919	209.363125696235	510.104235221885	0.00291545189504373	0.00425531914893617
Chr2	3802895	3809786	6892	LTR/Gypsy	0.0668872616984402	6891	0.519082861703671	94.2246144893803	Core	-0.313573772228679	5.03065184543009	5.03065184543009	5.03065184543009	317.7568525541	133.579651044824	209.572543617296	555.572801684677	0.004155446959875	0.00384538353695173
Chr3	2504807	2510128	5322	LTR/Gypsy	0.0890504049726879	5279	0.228452358401212	92.0803334596438	Core	1.28659932659933	5.03065184543009	5.03065184543009	5.03065184543009	1880.20567638249	1106.93450993394	209.618087816521	59.9110470473824	0.00784593437945792	0.0072202166064982
Chr8	1057602	1063585	5984	LTR/Gypsy	0.0791642833333333	5983	0.521477519638977	93.1306684581794	Core	-0.384302161032037	5.03065184543009	5.03065184543009	5.03065184543009	358.154130337639	103.507605563046	209.92150080497	526.373530872198	0.00293212138982554	0.00330475597490301
Chr5	551161	551393	233	Unspecified	0.138607394957983	232	0.439655172413793	89.2241379310345	Core	0.130952380952381	5.34909423761091	5.2811073641916	5.34309862928145	28.983739281382	0	209.960414579422	1084.22739431838	0	0.00381679389312977
Chr5	22406	24268	1863	DNA/Tc1-Mariner	0.00321132904608789	1862	0.547798066595059	99.8925886143931	Core	-0.620148514851485	8.18722290297869	8.01972461422757	7.49718390332454	190.67593767972	137.171947427212	210.09898855115	541.099447886514	0.00357717760686818	0.00252100840336134
Chr4	3062351	3069920	7570	LTR/Gypsy	0.0972216888888889	7383	0.178789110117838	91.3561847988077	Core	1.21335832675612	5.03065184543009	5.03065184543009	5.03065184543009	69.4472299496485	557.547134342016	210.348517595502	24.8075008010643	0.00711743772241993	0.0125
Chr1	662820	663454	635	Unspecified	0.15518896656535	634	0.178233438485804	89.4736842105263	Core	1.22641509433962	5.03065184543009	5.03065184543009	5.03065184543009	5.28850219115263	361.762880694483	210.429108409619	22.5736500180301	0.0102040816326531	0
Chr7	1902323	1902571	249	Unspecified	0.15856442687747	248	0.431451612903226	87.0967741935484	Core	0	5.03065184543009	5.25498779214818	5.19799905294362	13.5531250485814	81.5742355865021	210.588706613897	803.481807321921	0	0.0066006600660066
Chr7	2006294	2008166	1873	LTR/Gypsy	0.215111517467249	1838	0.256256800870511	83.2581736189402	Core	1.38875323714391	5.03065184543009	5.03065184543009	5.03065184543009	1.78921533244234	999.458688236656	210.760579754776	67.2494089059317	0.0159045725646123	0.0128205128205128
Chr4	3991556	3997992	6437	LTR/Gypsy	0.0770297071129707	6436	0.520198881292728	93.5054773082942	Core	-0.366045548654244	5.13283576313994	5.03065184543009	5.2277855635108	336.582962065074	112.884125324394	210.791361593644	535.641552650051	0.00259833994947672	0.00248745363299149
Chr1	4251439	4257422	5984	LTR/Gypsy	0.07897574	5983	0.521310379408324	93.147463889822	Core	-0.384302161032037	5.1295646765902	5.407056250707	6.74496777093104	386.134921770267	101.984573449498	210.89091159794	558.156326950325	0.00264094193595716	0.00257240853658537
Chr3	1767457	1767706	250	DNA/Mite	0.135714110671937	249	0.317269076305221	88.7550200803213	Core	0.643636363636364	5.03065184543009	5.19040660395899	5.16928288619553	13.4984753508049	213.357241561695	211.156717783109	507.353403479831	0	0.0105820105820106
Chr2	641059	643058	2000	LTR/Copia	0.0547943810005053	1957	0.224322943280531	95.7566462167689	Core	1.4127731092437	5.03065184543009	5.03065184543009	5.03065184543009	1.67548642992974	1173.66071969869	211.348225780373	61.1868688426651	0.010989010989011	0
Chr6	1836306	1836552	247	Unspecified	0.2509684375	246	0.463414634146341	80.8943089430894	Core	0.176470588235294	6.31681448812582	5.87329862221745	6.63360725798086	0	77.9493573982395	211.590542021809	798.70027068896	0.00351493848857645	0.00152905198776758
Chr6	3451485	3451961	477	LTR/Gypsy	0.051792828685259	476	0.51890756302521	100	Core	-0.378662244333886	5.03065184543009	5.03065184543009	5.03065184543009	0	202.871577197736	211.61319221364	712.784780911422	0.00427089688834655	0.00287976961843053
Chr6	2305712	2318282	12571	LTR/Gypsy	0.0881740374787053	4105	0.259439707673569	92.0988258317025	Core	1.28181840170279	6.76489607867635	7.56445591407943	6.81483031463454	1193.20121360158	869.191995339054	211.673001646908	87.9167249329786	0.0231729055258467	0.0233333333333333
Chr3	2525425	2539216	13792	LTR/Gypsy	0.0909990556189855	6108	0.183529796987557	91.8812530752829	Core	1.21110829031621	5.03065184543009	5.03065184543009	5.03065184543009	764.927959821305	723.241385548402	211.816277436166	35.8062723672505	0.0115473441108545	0
Chr5	2185970	2186078	109	LTR/Copia	0.16321781512605	108	0.574074074074074	92.5925925925926	Core	0.7	5.03065184543009	5.31141375903306	5.10018468709118	62.572371719619	2634.65887277484	211.858675133828	749.325631673269	0.00709219858156028	0.0033112582781457
Chr2	563552	571170	7619	LTR/Gypsy	0.128509745248686	7412	0.280221262817053	88.7304820095044	Core	1.36540004103942	5.03065184543009	5.03065184543009	5.03065184543009	4.83442835197529	996.774568843895	212.132933381922	97.1846952742233	0.0125075650595118	0.00841750841750842
Chr4	1317144	1317526	383	LTR/Gypsy	0.324171922141119	382	0.515706806282722	82.6589595375723	Core	-0.113131313131313	9.33566614948223	8.37933168435383	7.63389350680353	0	0.459861604242064	213.54840637256	635.488734431463	0.00449438202247191	0.00302480338777979
Chr8	2754058	2760042	5985	LTR/Gypsy	0.0793177303782703	5984	0.521390374331551	93.1306684581794	Core	-0.384302161032037	5.1295646765902	5.38143945838056	6.61302046030395	368.165669671694	98.9219726171507	213.675296014483	524.494337511521	0.00362198322060835	0.00398217502607376
Chr6	3495350	3502246	6897	LTR/Gypsy	0.0711418481561822	6896	0.518126450116009	94.0695296523517	Core	-0.338300653594771	5.13283576313994	5.03065184543009	5.03065184543009	353.94000806711	139.784655396731	213.72774667064	533.467405188601	0.00336342107972681	0.00323049588111775
Chr5	2368525	2374508	5984	LTR/Gypsy	0.0791642833333333	5983	0.521477519638977	93.1306684581794	Core	-0.384302161032037	5.1295646765902	5.38143945838056	6.59506530200061	355.356051194376	100.11007238667	213.79914397685	536.7245041252	0.00323907267896786	0.00359287098756678
Chr1	7767057	7767300	244	Unspecified	0.165416987951807	243	0.432098765432099	86.8312757201646	Core	0.303030303030303	5.27205695342783	5.69648837799282	5.67299273036427	0	186.067226043678	214.213565270013	788.9195296074	0.0022075055187638	0
Chr1	3027193	3036924	9732	LTR/Gypsy	0.0894609712933429	9689	0.270203323356384	92.0791054048457	Core	1.32716013127457	5.03065184543009	5.03065184543009	5.03065184543009	432.128786235511	1332.18749631232	214.413125279605	105.491793745615	0.009000900090009	0.0101818181818182
Chr3	2460939	2472748	11810	LTR/Gypsy	0.0973894400396432	2008	0.217131474103586	91.462805791313	Core	1.27183427348765	5.03065184543009	5.03065184543009	5.03065184543009	411.081617221328	1200.48437373137	214.450940781572	80.5067268544024	0.00797872340425532	0
Chr6	2832466	2832639	174	Unspecified	0.218772240437158	173	0.508670520231214	84.8837209302326	Core	0.666666666666667	5.03065184543009	5.03065184543009	5.03065184543009	0	115.107102601358	214.55130837647	941.531193193882	0.0029806259314456	0
Chr4	1245251	1250086	4836	LINE/I	0.0914517737630876	4835	0.56153050672182	92.1276154961674	Core	-0.609500792004834	8.2301376697362	7.38436604947938	9.59085370893927	0	57.0492852491395	214.66121112915	597.514880692908	0.00289354177550938	0.00318382394012177
Chr3	2462323	2472124	9802	LTR/Gypsy	0.0959257750946485	9738	0.263914561511604	91.513903192585	Core	1.32974221211965	5.03065184543009	5.03065184543009	5.03065184543009	493.603431297392	1263.78077425843	214.782331554002	86.8768803563803	0.0079623597538907	0.00837988826815642
Chr5	593772	597068	3297	Unspecified	0.0124347552870091	3296	0.594053398058252	99.1808252427185	Core	-0.663311688311688	8.79396471504207	9.55754653364146	7.58744960303104	234.689121668258	75.932013140143	214.873158594108	862.382510396695	0.00260040450736781	0.00292986632484893
Chr2	4163471	4163661	191	Unspecified	0.246342266009852	190	0.447368421052632	83.5106382978723	Core	-1.22222222222222	5.33268943692065	5.40255170122955	5.56054459059001	0	53.7673107436038	215.708123191097	882.044472926731	0.0106761565836299	0.00318979266347687
Chr1	2944317	2944785	469	Unspecified	0.175692665289256	468	0.232905982905983	90.3370786516854	Core	1.07460317460317	5.27205695342783	5.03065184543009	5.03065184543009	0	1166.42271137312	215.990838925177	45.8965325313053	0.0075187969924812	0
Chr1	3062869	3072648	9780	LTR/Gypsy	0.0996786684312328	9779	0.262194498414971	91.1689376088516	Core	1.31006747093227	5.03065184543009	5.03065184543009	5.03065184543009	487.182035712871	1276.69442361998	216.092281160823	87.7624327787294	0.0127182582453115	0.00392156862745098
Chr4	3461996	3462232	237	Unspecified	0.169818801652893	236	0.466101694915254	86.8085106382979	Core	-0.329831932773109	5.33280134085501	5.75910058963904	6.11990484863627	0	93.9409198861469	216.107729215351	871.535006866327	0.00695410292072323	0
Chr6	2172920	2183626	10707	LTR/Gypsy	0.108424039610185	3143	0.191854915685651	90.8946195479147	Core	1.15818498452012	5.03065184543009	5.03065184543009	5.03065184543009	383.07676894671	773.023318712152	217.12758471299	29.3286996859663	0.00602409638554217	0
Chr8	1063585	1064061	477	LTR/Gypsy	0.051792828685259	476	0.51890756302521	100	Core	-0.378662244333886	5.03065184543009	5.03065184543009	5.03065184543009	0	440.046893812543	217.162489212249	695.236738239512	0.00293599530240752	0.00417246175243394
Chr4	3532525	3539366	6842	LTR/Gypsy	0.0684062636244732	6841	0.519514690834673	94.099560761347	Core	-0.332703137570394	8.87264713900997	9.17435462179542	9.48754676397899	273.095469728916	122.414553968179	217.296083399253	562.65152694063	0.00355356672808634	0.00403864428254672
Chr4	68838	68978	141	LTR/Copia	0.118448366013072	140	0.564285714285714	96.4285714285714	Core	0.2	5.23174859430004	5.60831351318063	5.41899828375263	0	1.26048396558436	217.447273278845	1130.79370557945	0	0.00273972602739726
Chr4	3020438	3028009	7572	LTR/Gypsy	0.108678122990354	7427	0.253265113774068	90.3734663610624	Core	1.33055118480073	5.03065184543009	5.03065184543009	5.03065184543009	1.32666653381755	1088.99304068622	217.582046365337	75.8709720668746	0.00690675875678342	0.00878734622144113
Chr7	1548713	1548927	215	Unspecified	0.310294932735426	214	0.425233644859813	77.2511848341232	Core	-0.3	5.33268943692065	5.15577052953699	5.03065184543009	15.7165346807494	0	217.803393936032	689.485468273712	0.00306748466257669	0.00317965023847377
Chr6	439671	440147	477	LTR/Gypsy	0.051792828685259	476	0.51890756302521	100	Core	-0.378662244333886	5.03065184543009	5.03065184543009	5.03065184543009	0	186.27299360883	217.902395478731	685.209285284134	0.00248447204968944	0.00195058517555267
Chr8	1466562	1471829	5268	LTR/Gypsy	0.0873252456509272	5246	0.248189096454441	92.1790930053805	Core	1.27253521126761	5.03065184543009	5.03065184543009	5.03065184543009	226.310936530927	1289.79967261075	217.974475219465	81.8562730572148	0.00910125142207053	0.0176470588235294
Chr6	2174321	2181777	7457	LTR/Gypsy	0.0872701058273777	7243	0.187077177964932	92.2693956575854	Core	1.20102948296511	5.03065184543009	5.03065184543009	5.03065184543009	549.629669978206	811.781938977823	217.991968303077	27.4196923676418	0.00630693763139453	0.00740740740740741
Chr8	740785	741239	455	LTR/Gypsy	0.143097654584222	454	0.508810572687225	93.9393939393939	Core	-0.250278706800446	5.03065184543009	5.03065184543009	5.03065184543009	295.595751611445	233.996465973106	218.011013065311	714.105541823131	0.00580130529369108	0.00122624156958921
Chr1	7227696	7234563	6868	LTR/Gypsy	0.0721674467159635	6867	0.519440803844474	93.925644028103	Core	-0.346248679112364	6.00066909630829	6.67597304959657	7.17453976119132	264.260277126972	139.303305209639	218.03446001843	535.200331875918	0.00315621531631521	0.00260459059091649
Chr4	3008673	3010655	1983	LTR/Copia	0.111315464942815	1981	0.237253912165573	91.2690355329949	Core	1.27062706270627	5.03065184543009	5.03065184543009	5.03065184543009	1.68986465774842	1427.21844301678	218.218190909478	74.13447993049	0.0138121546961326	0
Chr1	641211	641476	266	LTR/Gypsy	0.14920597826087	265	0.437735849056604	89.4339622641509	Core	1.08756756756757	5.03065184543009	5.03065184543009	5.03065184543009	12.6803859356046	862.099414052568	218.328402117008	333.773647141592	0.0173913043478261	0.00727272727272727
Chr3	2389855	2399723	9869	LTR/Gypsy	0.0896805331441314	9826	0.247913698351313	91.9433693216541	Core	1.31791106223976	5.03065184543009	5.03065184543009	5.03065184543009	1707.90803477816	1163.82233404823	218.381831043213	73.6154478012732	0.0100727476217124	0.0102790014684288
Chr5	2029505	2030280	776	LTR/Gypsy	0.127518067226891	705	0.190070921985816	89.2198581560284	Core	1.14900763358779	5.03065184543009	5.03065184543009	5.03065184543009	281.131037021932	689.737151674214	218.41096154303	39.486874660092	0.0152671755725191	0
Chr8	737281	739143	1863	DNA/Tc1-Mariner	0.00321132904608789	1862	0.547798066595059	99.8925886143931	Core	-0.620148514851485	8.17997675516341	8.01471673898392	7.49165648597592	158.297004866183	152.047148314995	218.597374604904	507.827270562786	0.00333905743178783	0.00256081946222791
Chr6	2245877	2254217	8341	LTR/Gypsy	0.0930207050669216	8340	0.245803357314149	91.7839528449417	Core	1.33903175502433	5.03065184543009	5.10919404715617	5.03065184543009	1.60576658448237	1374.1132923387	218.611291163591	83.6773453090702	0.00902255639097744	0
Chr5	1899204	1905363	6160	LTR/Gypsy	0.0990314674000971	6159	0.253612599447962	91.1219512195122	Core	1.30529545102345	5.03065184543009	5.03065184543009	5.03065184543009	5.43621612049304	1160.30005317781	218.760773258487	94.556943618477	0.0113803230543319	0.00749063670411985
Chr2	243361	243578	218	Unspecified	0.305528623853211	217	0.428571428571429	79.7979797979798	Core	-0.0565610859728507	6.31506982555014	6.20424399270717	6.04890188887917	0	0	218.846118517692	927.984289224998	0.00255754475703325	0
Chr1	4257422	4257898	477	LTR/Gypsy	0.051792828685259	476	0.51890756302521	100	Core	-0.378662244333886	5.03065184543009	5.03065184543009	5.03065184543009	0	272.216770858053	219.012254878453	646.770715621853	0.00439077936333699	0.00319081046585833
Chr8	1515927	1523497	7571	LTR/Gypsy	0.107341260875385	7432	0.23694833153929	90.4903017241379	Core	1.33474820647335	5.03065184543009	5.03065184543009	5.03065184543009	17.6912241352866	1075.84995961376	219.398484189969	67.0185990725542	0.00559646539027982	0.00649350649350649
Chr4	1389822	1390496	675	Unspecified	0.0484441333333333	674	0.602373887240356	96.1136023916293	Core	-0.937837837837838	6.2522527078377	6.5563687394464	6.71061021749175	4.97417813818665	79.1426604007917	219.855506150951	895.871470236355	0.00195149149707276	0.0017531556802244
Chr5	2038676	2038868	193	LTR/Gypsy	0.0900359585492228	192	0.453125	94.6236559139785	Core	2.9	5.03065184543009	5.03065184543009	5.03065184543009	17.5268161623017	1318.18245412417	219.889682990275	382.373206064572	0.0242718446601942	0
Chr6	2367866	2367982	117	Unspecified	0.299613492063492	116	0.491379310344828	80	Core	2.9	5.03065184543009	5.03065184543009	5.03065184543009	0	0	220.041689683992	1794.76875360743	0	0
Chr4	968122	971419	3298	Unspecified	0.01212516918429	3297	0.59417652411283	99.1810737033667	Core	-0.663311688311688	8.80340960190945	9.56441958304226	7.59131781754009	237.664903385288	85.7431215023583	220.192827407404	878.137358453208	0.00315978805113995	0.00303053261610728
Chr6	2171366	2172919	1554	LTR/Gypsy	0.089030153256705	1553	0.176432710882164	92.3920051579626	Core	1.21381495564005	5.03065184543009	5.03065184543009	5.03065184543009	2603.46624845911	579.358064356748	220.225806039102	28.6437122651464	0.00833333333333333	0
Chr5	1970961	1972223	1263	LTR/Gypsy	0.0952344023083265	1205	0.231535269709544	91.9933277731443	Core	1.36898395721925	5.03065184543009	5.03065184543009	5.03065184543009	5.30947166851644	947.73100473107	220.460969051285	70.5075994218989	0.0214007782101167	0.04
Chr3	2484036	2487893	3858	LTR/Gypsy	0.104050552147239	3727	0.187818620874698	90.7675791733763	Core	1.1683563472101	5.03065184543009	5.03065184543009	5.03065184543009	836.905471749904	893.348070379208	220.571123786361	30.9836420793376	0.0032626427406199	0
Chr1	7124995	7125254	260	Unspecified	0.203607303370787	259	0.355212355212355	85.0980392156863	Core	0.696491228070175	5.31278360448795	5.80323115033171	5.57027198905081	0	419.682533378403	220.681345758654	404.612261127436	0	0.0447761194029851
Chr3	2521117	2525425	4309	LTR/Gypsy	0.103484349744543	4287	0.230230930720784	90.7541442913845	Core	1.2715236419156	5.03065184543009	5.03065184543009	5.03065184543009	4.66350854933775	1132.60293596521	221.097890362134	54.0961336251674	0.00838926174496644	0
Chr2	520533	521184	652	LTR/Copia	0.116318042813456	651	0.158218125960061	89.6923076923077	Core	1.14354838709677	5.03065184543009	5.03065184543009	5.03065184543009	0	384.108248435573	221.146599877918	67.7817252656772	0.0125	0
Chr8	1423475	1426590	3116	LTR/Gypsy	0.0916907326865172	2970	0.208417508417508	91.8855218855219	Core	1.23636675105164	5.03065184543009	5.03065184543009	5.03065184543009	5.37511542549714	1084.77719622635	221.49369710517	38.8762376073198	0.00945945945945946	0.0169491525423729
Chr5	3569325	3569460	136	LTR/Copia	0.0147382352941176	135	0.444444444444444	99.2592592592593	Core	-0.3	5.17314412226773	5.19040660395899	5.69506480926295	0	172.592237317477	221.626774409638	1057.46600429611	0	0.0060790273556231
Chr5	54938	55414	477	LTR/Gypsy	0.051792828685259	476	0.51890756302521	100	Core	-0.378662244333886	5.03065184543009	5.03065184543009	5.03065184543009	7.04762502526235	313.89765853686	221.971879944378	662.647516134534	0.00436953807740325	0.00899031811894882
Chr4	2885786	2904530	18745	LTR/Gypsy	0.101587710989678	4919	0.245578369587314	91.1260709914321	Core	1.33112404836543	5.03065184543009	5.03065184543009	5.03065184543009	11.9666364204756	914.372002416176	221.996552697755	114.461541336821	0.0184599156118143	0.00625
Chr3	2444348	2449363	5016	LTR/Gypsy	0.0960051589682064	4972	0.249396621078037	91.6162837565498	Core	1.28460008375209	5.03065184543009	5.03065184543009	5.03065184543009	1049.55357127311	1180.2903868908	222.410894930971	77.0249645933325	0.00792602377807133	0.0075
Chr4	3053153	3070431	17279	LTR/Gypsy	0.0924583521560575	9688	0.247729149463254	91.8259791257621	Core	1.28280927131446	5.03065184543009	5.03065184543009	5.03065184543009	469.484738797249	855.926613717192	222.840714139043	54.8616652547934	0.0142118863049096	0.0145102781136638
Chr1	662148	662820	673	LTR/Copia	0.110910176730486	672	0.132440476190476	90.6110283159464	Core	0.955760816723384	5.03065184543009	5.03065184543009	5.03065184543009	6241.24438246873	706.834699228502	222.867817115042	13.6053059534898	0	0
Chr7	2100793	2101013	221	DNA/Mite	0.260582197309417	220	0.477272727272727	81.042654028436	Core	-0.815217391304348	5.53703628579548	5.47991025321447	5.09975004453444	0	103.204283045174	223.069914358106	576.349607652124	0.00213219616204691	0.00236127508854782
Chr6	2218154	2218936	783	LTR/Gypsy	0.120994394141145	743	0.191117092866756	89.6366083445491	Core	1.03030303030303	5.03065184543009	5.03065184543009	5.03065184543009	0	1305.64189305818	223.203478083207	36.5918577757056	0	0
Chr5	293527	293736	210	Unspecified	0.222710900473934	209	0.425837320574163	84	Core	-0.263427109974425	5.83331829956589	5.31552528806589	5.2023543974499	0	1.68468530015602	223.883897339732	728.958869692813	0.0102249488752556	0.0163551401869159
Chr3	2436704	2438848	2145	LTR/Copia	0.0859195567867036	2144	0.25419776119403	92.7238805970149	Core	1.23453389830508	5.13159268805071	5.1977907162999	5.38752645406029	4.68635821791827	1421.03480215083	224.764223355562	87.9780709697101	0.0122377622377622	0
Chr6	2203329	2214021	10693	LTR/Gypsy	0.0863444555873925	9739	0.267789300749564	92.2554767047208	Core	1.31811356190224	5.1295646765902	5.03065184543009	5.09975004453444	1408.43730686786	1279.43425908248	224.87430432475	141.934824525255	0.0140949554896142	0.0140969162995595
Chr6	433135	433688	554	LTR/Gypsy	0.083181275862069	553	0.471971066907776	97.4358974358974	Core	-0.120209059233449	5.03065184543009	5.11186440223292	5.09975004453444	6.06453240398481	264.080524731703	225.071577845171	584.594149312037	0.00309214594928881	0.00222882615156018
Chr6	2282977	2299714	16738	LTR/Gypsy	0.0988000303275374	9870	0.297872340425532	91.3331296466035	Core	1.40975580086975	5.17489244698057	5.10919404715617	5.2023543974499	769.69700174322	604.944560661427	225.08816477699	300.820592887858	0.0232077205882353	0.013555787278415
Chr3	2499314	2504076	4763	LTR/Copia	0.082915	4710	0.254564755838641	92.9406761641505	Core	1.31411440128383	5.03065184543009	5.03065184543009	5.03065184543009	4.92193934236448	1212.06189556346	225.482199791919	82.1185071675642	0.00838574423480084	0.012987012987013
Chr5	1881806	1882581	776	Unspecified	0.293430754966887	775	0.20258064516129	79.0664780763791	Core	1.31380027739251	5.03065184543009	5.03065184543009	5.03065184543009	0	604.170809917452	225.676191033027	28.2049104714943	0	0
Chr1	2997565	3007461	9897	LTR/Gypsy	0.0980189501259446	9896	0.258185125303153	91.3842094580881	Core	1.30570349294359	5.03065184543009	5.03065184543009	5.03065184543009	1007.83886825385	1273.5328726585	226.092959692882	91.2173935468341	0.00829875518672199	0.00738916256157635
Chr7	1991868	2001848	9981	LTR/Gypsy	0.0931218005906915	9783	0.242563630788102	91.7033698658199	Core	1.28569919662004	5.03065184543009	5.03065184543009	5.03065184543009	1069.46773982912	974.587154090619	226.109245378755	72.4312399378504	0.0105695830886671	0.0112044817927171
Chr4	2961805	2965224	3420	LTR/Copia	0.0917679358068316	3373	0.270085976875185	92.2047009818506	Core	1.42085162655382	5.03065184543009	5.23698308633982	5.17381668090902	51.9087068493211	1047.80919570827	226.368996982968	96.6171593515998	0.00875547217010632	0.01875
Chr1	4250963	4251439	477	LTR/Gypsy	0.051792828685259	476	0.51890756302521	100	Core	-0.378662244333886	5.03065184543009	5.03065184543009	5.03065184543009	0	241.232748158762	226.781270676506	727.825960344489	0.0025062656641604	0.000639795265515035
Chr3	2388468	2401393	12926	LTR/Gypsy	0.0952946446615022	2954	0.22241029113067	91.6214382632293	Core	1.33102835644116	5.03065184543009	5.03065184543009	5.03065184543009	1303.9251454005	1150.89920225174	226.988460461278	68.3031653129892	0.00455062571103527	0.028169014084507
Chr6	569006	569185	180	Unspecified	0.197031968911917	179	0.402234636871508	87.7094972067039	Core	0.37719298245614	5.03065184543009	5.03065184543009	5.16928288619553	0	239.187454525522	227.063931497409	900.874635831908	0.00701754385964912	0.00904977375565611
Chr5	1894686	1899201	4516	LTR/Copia	0.0941601168276792	4413	0.272830274189893	91.8422841604351	Core	1.36494545454545	5.03065184543009	5.03065184543009	5.03065184543009	66.7447872906436	1135.81975578211	227.114671063307	169.970399817305	0.0105566218809981	0.00383141762452107
Chr4	2987041	2993011	5971	LTR/Gypsy	0.0895697832712496	5876	0.218686181075562	91.9986380660538	Core	1.2695088213801	5.03065184543009	5.03065184543009	5.03065184543009	2.24333850695233	826.782242979971	227.365609450202	48.8752235584715	0.0101867572156197	0.00411522633744856
Chr2	530986	531126	141	LTR/Copia	0.214023529411765	140	0.471428571428571	87.1428571428571	Core	2.61538461538462	5.03065184543009	5.03065184543009	5.03065184543009	0	2263.82920218951	227.561099942977	394.064473156475	0.0131578947368421	0
Chr8	1511425	1515927	4503	LTR/Copia	0.0896559195530726	4450	0.272359550561798	92.0413669064748	Core	1.40549748354626	5.03065184543009	5.03065184543009	5.03065184543009	2.23125209086844	1164.67486220606	227.692550478381	149.208767315355	0.00858369098712446	0.0300751879699248
Chr5	1894012	1906350	12339	LTR/Copia	0.0898788323353293	1656	0.22524154589372	92.2658610271903	Core	1.27362104187947	5.03065184543009	5.03065184543009	5.10018468709118	27.4061611888596	1137.67561664825	227.746681325087	121.16404055029	0.0138888888888889	0
Chr4	3045670	3052253	6584	LTR/Gypsy	0.104226567141089	6435	0.234654234654235	90.6701912610792	Core	1.27436282919755	5.03065184543009	5.03065184543009	5.03065184543009	114.435570430707	990.392241396371	228.00286918727	63.0778385607129	0.00950931913275009	0.00813008130081301
Chr2	367569	367771	203	Unspecified	0.189533179723502	202	0.366336633663366	88.1188118811881	Core	0.638888888888889	5.03065184543009	5.11186440223292	5.19782060273641	0	122.906593241233	228.183779569687	436.414541455539	0.0181268882175227	0
Chr8	1538420	1548285	9866	LTR/Gypsy	0.134328406471183	9865	0.35590471363406	88.1742316303684	Core	1.53518395150924	5.03065184543009	5.03065184543009	5.03065184543009	557.258225715062	1385.12147371376	228.210901002222	229.001601068705	0.0143491039013427	0.0115159128978224
Chr8	1884358	1884613	256	DNA/Mite	0.15998667953668	255	0.313725490196078	86.6666666666667	Core	0.501089324618736	5.03065184543009	5.11924851457382	5.03065184543009	0	204.178552283476	228.307691478223	339.100955831871	0.0267639902676399	0.0432900432900433
Chr1	2943173	2943320	148	LTR/Copia	0.133159375	147	0.54421768707483	94.5578231292517	Core	0.154761904761905	5.23050551921081	5.15577052953699	5.15087785571597	0	1776.07370821928	228.686782705252	494.790700908899	0	0
Chr3	2423298	2425183	1886	LTR/Gypsy	0.143574202271498	1846	0.280065005417118	88.3131201764057	Core	1.1991502920871	5.03065184543009	5.03065184543009	5.03065184543009	191.901891611443	1265.69583930618	228.800500012553	95.2270943701152	0.00949667616334283	0
Chr6	3492065	3493927	1863	DNA/Tc1-Mariner	0.00321132904608789	1862	0.547798066595059	99.8925886143931	Core	-0.620148514851485	8.18216015101076	8.01876471105294	7.49503216872261	154.699345664679	150.729092540128	228.889864381118	479.247323374457	0.00428621413575927	0.00290084388185654
Chr8	1057126	1057602	477	LTR/Gypsy	0.051792828685259	476	0.51890756302521	100	Core	-0.378662244333886	5.03065184543009	5.03065184543009	5.03065184543009	0	345.988253475411	229.00098947595	741.195897618325	0.00544794188861985	0.00368776889981561
Chr1	6923907	6924450	544	Unspecified	0.306358903107861	543	0.513812154696133	75.2767527675277	Core	-0.982142857142857	5.40595038493038	5.48973035532754	5.72575527401005	0	0.646521296000835	229.224189982536	574.142601565591	0.00244648318042813	0.00423011844331641
Chr7	1992731	1992928	198	LTR/Gypsy	0.112252663316583	197	0.446700507614213	90.3553299492386	Core	0.868421052631579	5.03065184543009	5.03065184543009	5.03065184543009	17.0797035051001	1359.64418122388	229.521943888064	234.911844320282	0.00608519269776876	0.00440528634361234
Chr1	3072637	3079341	6705	LTR/Gypsy	0.0943214796698257	6515	0.207060629316961	91.6051660516605	Core	1.24671324075768	5.03065184543009	5.03065184543009	5.03065184543009	464.461935686953	967.809103991048	229.99544204267	33.042125488871	0.00470114170584285	0.015625
Chr8	1123786	1124207	422	Unspecified	0.243433068181818	421	0.204275534441805	83.2116788321168	Core	1.17630597014925	5.03065184543009	5.03065184543009	5.03065184543009	0	566.503510265798	230.538056660485	37.8019059825742	0	0
Chr8	2487652	2487794	143	Unspecified	0.0727499300699301	142	0.549295774647887	93.6619718309859	Core	0.0666666666666667	5.27123217027093	5.34902897245022	5.15012889933759	0	426.213432816778	230.56476300369	1021.85790533746	0.00562587904360056	0.00210526315789474
Chr3	615597	615844	248	DNA/Mite	0.175594140625	247	0.473684210526316	87.3469387755102	Core	-0.0925925925925926	7.68783647481879	5.80883210881288	5.46593004015942	0	98.2870058042245	230.731949054649	898.717264793029	0.0016366612111293	0
Chr8	1313016	1313320	305	Unspecified	0.219372336448598	304	0.371710526315789	84.7682119205298	Core	0.709677419354839	5.17489244698057	5.03065184543009	5.20439307525702	0	573.615884641903	230.823893858551	434.909056948032	0.0458015267175572	0.028169014084507
Chr8	1954813	1955018	206	DNA/Mite	0.211888888888889	205	0.448780487804878	86.5	Core	-0.557894736842105	5.1295646765902	5.43443770194672	5.73895685264796	0	105.639678233313	230.858009125157	544.792174454745	0.00540540540540541	0.00196463654223969
Chr6	2189768	2199630	9863	LTR/Gypsy	0.0957550636492221	9861	0.290132846567285	91.4651493598862	Core	1.34050505372511	5.03065184543009	5.03065184543009	5.03065184543009	193.164674343655	1333.28806734262	231.167246839954	129.328060154255	0.010848928668294	0.00324044069993519
Chr4	1336044	1337906	1863	DNA/Tc1-Mariner	0.0048278563772776	1862	0.547261009667025	99.7314715359828	Core	-0.615951042340415	6.94517524169997	6.26818315132057	6.2992512280255	437.115592982755	92.8287852870495	231.439380197244	526.169624728431	0.00353037023626324	0.00289975144987572
Chr3	2975677	2975807	131	Unspecified	0.190710322580645	130	0.476923076923077	86.4406779661017	Core	0.864285714285714	5.03065184543009	5.33812374981348	5.10471848180467	0	1.35819590090098	231.57918999365	1018.45367629796	0	0.00426439232409382
Chr8	1537656	1548798	11143	LTR/Gypsy	0.0927736429725363	1230	0.194308943089431	91.8633034987795	Core	1.20637898686679	5.03065184543009	5.03065184543009	5.03065184543009	493.985313906056	1330.33917009193	231.595941235237	208.5246239133	0.00480769230769231	0
Chr8	1492853	1502298	9446	LTR/Gypsy	0.0904883127572016	9445	0.272736897829539	91.8097054460691	Core	1.36566921653917	5.03065184543009	5.03065184543009	5.03065184543009	533.832969273763	1320.5663672641	231.810267218137	114.948775418739	0.00765566519224226	0.00503524672708963
Chr6	3383442	3383571	130	LTR/Copia	0.288767552447552	129	0.573643410852713	82.03125	Core	-0.671052631578947	5.13159268805071	5.11186440223292	5.10018468709118	0	1.36880680637677	232.01552946009	1379.9172320592	0	0.00529100529100529
Chr3	599663	599866	204	Unspecified	0.272721146788991	203	0.477832512315271	81.592039800995	Core	-1.28947368421053	5.53359213110056	5.625611689306	5.21966174099868	16.572385579206	0	232.273792689321	1076.79290605808	0	0.00471698113207547
Chr6	3445026	3445502	477	LTR/Gypsy	0.051792828685259	476	0.51890756302521	100	Core	-0.378662244333886	5.03065184543009	5.03065184543009	5.03065184543009	0	285.864495142264	232.330567675115	676.853074487986	0.0032626427406199	0.00233236151603499
Chr1	2946743	2947439	697	Unspecified	0.130268213296399	696	0.248563218390805	92.1167883211679	Core	1.34365079365079	5.03065184543009	5.03065184543009	5.03065184543009	0	1406.95220238527	232.618013275043	84.5239739524033	0.00581395348837209	0
Chr5	1876645	1880674	4030	LTR/Copia	0.0858623119636547	3926	0.260825267447784	92.6388181355069	Core	1.31814982403218	5.03065184543009	5.03065184543009	5.03065184543009	108.041421377843	986.824072016516	232.660384383523	97.1606585495508	0.0130662020905923	0.0121951219512195
Chr5	2030317	2037892	7576	LTR/Gypsy	0.103985833333333	7528	0.240037194473964	90.7168506450326	Core	1.3228004434901	5.03065184543009	5.03065184543009	5.03065184543009	2.20994315223106	682.27663813723	232.849693883206	60.7904957575592	0.020136215575955	0.0113960113960114
Chr5	1891595	1893764	2170	LTR/Copia	0.0878621679962459	2114	0.247398297067171	92.5996204933586	Core	1.34531877957718	5.03065184543009	5.03065184543009	5.03065184543009	3.08821207287787	1339.51131015173	232.871675325256	162.759174997389	0.0158730158730159	0.05
Chr7	1619287	1619921	635	LTR/Gypsy	0.457933220910624	634	0.536277602523659	67.5	Core	-0.616063919259882	5.03065184543009	5.34491744341738	5.17425132346575	0	109.608340286928	233.470818169511	517.939858747023	0.000749344323716748	0.00273758310520141
Chr7	2030853	2038178	7326	LTR/Copia	0.127217272727273	827	0.239419588875453	89.9628252788104	Core	1.19866975130133	5.03065184543009	5.11186440223292	5.17425132346575	3.19952938407937	512.536289706124	233.647831166192	45.0897666116559	0.0119047619047619	0
Chr1	3093583	3093889	307	LTR/Gypsy	0.18824347133758	306	0.19281045751634	85.2459016393443	Core	1.43478260869565	5.03065184543009	5.03065184543009	5.03065184543009	0	197.610823929121	233.919546706411	40.3426898273046	0.027027027027027	0
Chr2	306884	307075	192	Unspecified	0.176927607655502	191	0.565445026178011	91.5343915343915	Core	0.0641711229946524	5.03065184543009	5.42145567790997	5.48043005847243	0	196.416572468717	233.995356774698	883.669291692648	0	0.00226757369614512
Chr3	2456941	2460264	3324	LTR/Copia	0.0521247880299252	3188	0.237452948557089	95.6344221105528	Core	1.20794211747977	5.03065184543009	5.03065184543009	5.03065184543009	46.3547883208857	1017.43632421199	234.074425626173	80.0531031268541	0.0055452865064695	0
Chr5	2014250	2020169	5920	LTR/Gypsy	0.197685656565657	5919	0.355634397702315	83.1691576086957	Core	1.6144448019448	5.03065184543009	5.03065184543009	5.12890085383927	1.69700332223705	779.40294390645	234.491711603683	201.075734779563	0.0319786808794137	0.0238600212089077
Chr5	3477977	3478115	139	LTR/Copia	0.152541408450704	138	0.478260869565217	91.6666666666667	Core	0.15	5.03065184543009	5.10919404715617	5.09975004453444	0	0	234.731212459428	956.084702405982	0.00248756218905473	0
Chr3	2384082	2385998	1917	LTR/Copia	0.0884421120913337	1916	0.188413361169102	92.1671018276762	Core	1.21904024767802	5.03065184543009	5.03065184543009	5.03065184543009	973.694721179523	688.020198196356	234.823646100426	22.3850451092632	0	0
Chr5	2004499	2006902	2404	LTR/Gypsy	0.150987258996002	2238	0.307864164432529	86.9175627240143	Core	1.39176194442341	5.03065184543009	5.03065184543009	5.03065184543009	0	741.676741767939	234.913308762256	118.315873928806	0.0222595548089038	0.0139211136890951
Chr3	2554606	2554814	209	DNA/Mite	0.269629333333333	208	0.283653846153846	81.1224489795918	Core	1.28869565217391	5.03065184543009	5.03065184543009	5.03065184543009	0	415.588261677136	235.152577324328	264.613341878019	0	0.0285714285714286
Chr1	2923093	2936287	13195	LTR/Gypsy	0.0832782958199357	5576	0.200681492109039	92.5314183123878	Core	1.22943722943723	5.03065184543009	5.03065184543009	5.03065184543009	177.112110750074	767.735340635947	235.200515630443	36.4638107734586	0.00857519788918206	0.00636942675159236
Chr4	2976777	2986718	9942	LTR/Gypsy	0.138338941910802	9941	0.37370485866613	87.7010215434409	Core	1.44371446986727	5.03065184543009	5.03065184543009	5.03065184543009	428.05104812641	1507.41708595691	235.305452377321	246.817162899603	0.0191250919475574	0.0117433244792395
Chr6	1886496	1886623	128	Unspecified	0.0617317557251908	127	0.511811023622047	96.8503937007874	Core	0.335526315789474	5.03065184543009	5.03065184543009	5.17425132346575	0	0	235.698315641996	1124.60670298158	0	0.00778210116731518
Chr1	572805	573441	637	Unspecified	0.12039185520362	636	0.283018867924528	92.1383647798742	Core	1.5	5.03065184543009	5.03065184543009	5.03065184543009	0	895.074626496753	235.779579562965	86.2597823129921	0.00950570342205323	0.0204081632653061
Chr4	2312003	2312126	124	Unspecified	0.088821811023622	123	0.51219512195122	94.3089430894309	Core	0.7	5.37341608798077	5.33812374981348	5.32244454412134	0	0	236.224172782336	819.867567458125	0.00301204819277108	0.008
Chr4	2884653	2885602	950	LTR/Gypsy	0.247389486607143	887	0.170236753100338	81.4469078179697	Core	1.09979550102249	5.03065184543009	5.03065184543009	5.03065184543009	3.53124671624432	318.256245816816	236.342685990355	21.3532918287642	0.0181818181818182	0
Chr5	3533122	3533408	287	DNA/Tc1-Mariner	0.331922433460076	286	0.541958041958042	76.6393442622951	Core	-0.646569646569647	6.73991322936612	5.92888837526298	6.79873628520836	0	267.421624487924	236.770005274003	863.475115601957	0.00175746924428822	0.00115874855156431
Chr3	2376066	2383635	7570	LTR/Gypsy	0.101974976462677	7409	0.241328114455392	91.0199106054449	Core	1.32978588344442	5.03065184543009	5.03065184543009	5.03065184543009	607.773846820491	786.696390486071	237.074551788285	51.8177818001089	0.00975312404754648	0.0275482093663912
Chr2	1483444	1483576	133	LTR/Copia	0.256115833333333	132	0.545454545454545	83.3333333333333	Core	-0.1125	5.52020176327337	5.10919404715617	5.03065184543009	0	1.33746008562005	237.43366165806	1508.9020334571	0	0.00237529691211401
Chr7	2031868	2036989	5122	LTR/Copia	0.0564549192100539	4979	0.2088772845953	95.1979103877838	Core	1.28237808177252	5.03065184543009	5.03065184543009	5.03065184543009	3.26916199902306	475.147062663536	238.4680323504	31.7846104013636	0.00986842105263158	0.0078740157480315
Chr5	1990432	1997587	7156	LTR/Gypsy	0.0983447493554855	6945	0.209071274298056	91.2285755437131	Core	1.25797796971452	5.03065184543009	5.03065184543009	5.10018468709118	1.87174832932604	1009.21739338527	238.536771949592	41.5562048644052	0.00964265456608054	0
Chr8	1109777	1110178	402	Unspecified	0.178180791366906	401	0.349127182044888	86.783042394015	Core	1.0530303030303	5.03065184543009	5.03065184543009	5.03065184543009	0	672.795921470309	238.550404727723	189.529306120131	0.00894187779433681	0
Chr6	2323578	2330754	7177	LTR/Gypsy	0.0961901034287334	7026	0.210076857386849	91.4611546685674	Core	1.24446098548859	5.03065184543009	5.03065184543009	5.03065184543009	546.817122169136	625.813511739296	238.793790706713	37.1749475418876	0.015962441314554	0.0175438596491228
Chr2	531228	532108	881	LTR/Copia	0.129258221208666	880	0.197727272727273	88.6337543053961	Core	1.20540034337443	5.03065184543009	5.03065184543009	5.03065184543009	0	718.369744554357	239.101678036407	50.5745636353893	0	0.0666666666666667
Chr1	9187245	9187406	162	LTR/Copia	0.15064899408284	161	0.509316770186335	93.5064935064935	Core	1	5.23050551921081	5.23396475576097	5.13529487615267	0	160.971680429908	239.42904341917	791.359275553951	0	0.00246913580246914
Chr1	7682373	7682801	429	Unspecified	0.357653642384106	428	0.504672897196262	78.4615384615385	Core	-0.235523747560182	5.13283576313994	5.03065184543009	5.7675051656323	0	33.2360397389094	239.516495747944	603.281237279278	0.00226500566251416	0.00431034482758621
Chr1	3079355	3090778	11424	LTR/Gypsy	0.0911220904586863	6240	0.184294871794872	91.7951188182402	Core	1.2137541879739	5.03065184543009	5.03065184543009	5.03065184543009	308.032796641271	796.547292918596	239.59097079139	61.5083542887534	0.00450856627592426	0.0202020202020202
Chr2	586580	588370	1791	LTR/Copia	0.0949467624633431	1689	0.239786856127886	91.9383521043272	Core	1.25854156042835	5.03065184543009	5.03065184543009	5.03065184543009	1.87122520234747	949.880001971034	239.673382574561	58.1291466506772	0.0121654501216545	0
Chr4	2966856	2976777	9922	LTR/Gypsy	0.101243323794383	9403	0.306497926193768	90.9149004153797	Core	1.45725806451613	5.03065184543009	5.11186440223292	5.17381668090902	367.495991425664	1140.31321084004	239.801047703855	181.574901024564	0.019932727046219	0.0100413467217956
Chr2	4218179	4218503	325	DNA/Mite	0.102127975460123	324	0.469135802469136	92.4528301886792	Core	0.29	6.69135104871354	5.96630428239526	6.64972479959335	0	84.0777926889012	239.925487881055	825.790243384035	0.00358851674641148	0.00586166471277843
Chr6	621652	622048	397	Unspecified	0.310648467336683	396	0.606060606060606	76.6404199475066	Core	-1.26666666666667	5.60180163490314	5.30672415651804	6.62218426743959	7508.84301742192	90.0432305237821	240.235389053725	772.737949003279	0.00202429149797571	0.00495399858457183
Chr4	4045104	4045549	446	Unspecified	0.305068752783964	445	0.595505617977528	76.6743648960739	Core	-1.23974358974359	5.52020176327337	5.23020120223024	9.17531201782822	0	50.9048152857955	240.636182161923	650.805786781074	0.00384800384800385	0.00303490136570561
Chr6	2794798	2795047	250	DNA/Mite	0.189776896551724	249	0.441767068273092	86.3453815261044	Core	-0.363768115942029	5.54772978254547	5.78706658034302	5.75692218555625	5925.83067900335	139.176743667728	240.91706055791	801.842445247304	0.00685871056241427	0.00338409475465313
Chr3	2138	3995	1858	DNA/Tc1-Mariner	0.000538213132400431	1857	0.510500807754443	100	Core	-0.400212089077413	5.03065184543009	5.03065184543009	5.03065184543009	140.686695682096	230.90354816535	241.152235680412	370.61550765728	0.00247524752475248	0.00401167031363968
Chr3	2781930	2782037	108	Unspecified	0.299255089285714	107	0.439252336448598	77.5700934579439	Core	0.653846153846154	5.30703755377027	5.27581516969108	5.27430674119526	31.5813385566002	1.65289878505874	242.040092360733	434.36529704505	0.0102040816326531	0.00598802395209581
Chr1	3009077	3012797	3721	LTR/Gypsy	0.0817811494565217	3678	0.214246873300707	92.4543721056933	Core	1.2120686134368	5.03065184543009	5.03065184543009	5.03065184543009	0.900140329927297	937.234055814898	242.257626837654	48.4543387520654	0.00470035252643948	0.0175438596491228
Chr8	1428215	1438080	9866	LTR/Gypsy	0.0923694071305929	9865	0.253826659908768	91.7258883248731	Core	1.30026297617038	5.03065184543009	5.03065184543009	5.03065184543009	1081.93618975616	1252.66804493645	242.302612375583	86.1924845350847	0.00922083909635777	0.0125427594070696
Chr2	629521	631300	1780	LTR/Copia	0.152479644128114	1678	0.222288438617402	87.5983061101028	Core	1.32104686215401	5.03065184543009	5.03065184543009	5.03065184543009	3.76560392238427	971.129166386901	242.737528255635	50.452150110601	0.00662251655629139	0.0208333333333333
Chr1	7510144	7510620	477	LTR/Gypsy	0.051792828685259	476	0.51890756302521	100	Core	-0.378662244333886	5.03065184543009	5.03065184543009	5.03065184543009	7.04762502526235	181.108989825615	243.059208539093	733.675307901792	0.00512032770097286	0.00520532099479468
Chr7	441931	442062	132	Unspecified	0.092834776119403	131	0.480916030534351	93.1297709923664	Core	0.0555555555555556	5.86927535367051	5.66571119146873	5.83879564775574	0	0	243.315329939029	925.128952950459	0	0.00448430493273543
Chr6	1893674	1893854	181	Unspecified	0.131752380952381	180	0.516666666666667	91.6666666666667	Core	0.148148148148148	6.62086688459242	6.6417894428794	6.64011898527298	0	0	243.466363663386	807.144607069265	0.00328407224958949	0.00340136054421769
Chr2	639027	640384	1358	LTR/Copia	0.156833423952976	1357	0.181282240235814	86.5627319970304	Core	1.11038148843027	5.03065184543009	5.03065184543009	5.03065184543009	3039.02842396499	983.150535902851	245.059847422614	31.0276706184403	0	0.0625
Chr2	368260	368420	161	DNA/Mite	0.296104210526316	160	0.475	79.2452830188679	Core	0.336363636363636	5.03065184543009	5.03065184543009	5.17425132346575	0	0	245.355710064304	821.299900734607	0.0066006600660066	0.00464396284829721
Chr1	95054	95417	364	Unspecified	0.434941405405405	363	0.264462809917355	68.2584269662921	Core	1.78888888888889	5.03065184543009	5.03065184543009	5.03065184543009	0	793.756698327655	245.630485012114	110.742876504199	0.0142857142857143	0
Chr6	2200480	2203292	2813	LTR/Copia	0.083167368043088	2760	0.268840579710145	92.9970972423803	Core	1.36380861396386	5.35124425002798	5.48973035532754	5.10471848180467	159.58069472001	1070.12936304212	245.806284935441	105.619412873404	0.00645756457564576	0.027027027027027
Chr8	1056491	1065483	8993	LTR/Copia	0.0756701962708538	2013	0.199205166418281	93.9333664843362	Core	1.30026685230305	5.03065184543009	5.03065184543009	5.03065184543009	238.663733685547	177.721089255031	245.854656872549	449.410046766472	0.0459770114942529	0
Chr3	1681078	1681234	157	LTR/Copia	0.141682395209581	156	0.551282051282051	92.3076923076923	Core	-0.6875	6.28385736360178	6.43187718523925	6.80781326839964	0	148.078403415004	246.018833605019	1152.3484243075	0	0.0152380952380952
Chr5	2195135	2195611	477	LTR/Gypsy	0.051792828685259	476	0.51890756302521	100	Core	-0.378662244333886	5.03065184543009	5.03065184543009	5.03065184543009	14.0952500505247	194.756714109826	246.018833605019	678.524316647216	0.00747663551401869	0.00563204005006258
Chr6	2299714	2300447	734	LTR/Gypsy	0.12864871967655	733	0.252387448840382	89.0859481582537	Core	1.28304347826087	5.03065184543009	5.03065184543009	5.03065184543009	6119.01377705668	692.930396408436	246.066846648267	91.6386368389042	0.021505376344086	0.0204081632653061
Chr8	1047386	1048144	759	Unspecified	0.311596758893281	758	0.175461741424802	77.4509803921569	Core	1.24074074074074	5.03065184543009	5.03065184543009	5.03065184543009	0	251.12270709327	246.761672128831	10.4866581986005	0.0206185567010309	0
Chr4	3602596	3602725	130	Unspecified	0.0686781954887218	129	0.511627906976744	96.1240310077519	Core	0.321637426900585	5.17314412226773	5.14536808661724	5.10018468709118	26.1532959921845	6.84403403188384	247.117131969327	1082.22722244643	0	0.0037037037037037
Chr6	2082763	2082872	110	Unspecified	0.0728479464285714	109	0.504587155963303	95.4128440366973	Core	1.86666666666667	7.67310954692221	7.19643608056281	6.98314142152248	0	150.87292799175	247.32052055531	922.471511269206	0.0239520958083832	0.02
Chr5	1988599	1990432	1834	LTR/Gypsy	0.110050850587577	1786	0.218924972004479	91.2721049629207	Core	1.27179295524619	5.03065184543009	5.03065184543009	5.03065184543009	3.65460904694281	991.852952938583	247.476836673794	77.7807230356514	0.00464037122969838	0
Chr5	1646872	1647130	259	DNA/Mite	0.0888829230769231	258	0.333333333333333	92.2480620155039	Core	0.765714285714286	5.03065184543009	5.29610356305058	5.26699331509975	0	0.681740354926951	247.523117746016	509.663829687235	0.0022883295194508	0.0104712041884817
Chr3	2543868	2544093	226	DNA/Mite	0.229051379310345	225	0.422222222222222	84.331797235023	Core	-0.678571428571429	5.31738472381821	5.5993583166567	5.49551977287838	0	207.276459251339	247.901630800975	800.92788300579	0.0046189376443418	0.0093167701863354
Chr5	2884171	2884430	260	DNA/Mite	0.0842712643678161	259	0.285714285714286	92.6640926640927	Core	0.419950738916256	5.03065184543009	5.03065184543009	5.03065184543009	12.9752786317815	84.2081458558607	247.925956346143	398.45846247911	0.00495049504950495	0
Chr5	1880757	1881393	637	Unspecified	0.111721055806938	636	0.259433962264151	93.217665615142	Core	1.37650686851696	5.03065184543009	5.03065184543009	5.03065184543009	5.27184549133798	1044.34570323373	247.955989775137	109.387405107055	0.0118577075098814	0.0344827586206897
Chr1	8909721	8909884	164	Unspecified	0.270103621621622	163	0.515337423312883	84.6625766871166	Core	0.214285714285714	5.30356198679218	5.55621282828329	5.51647575960701	0	95.174320166839	248.405259680552	774.239037346797	0	0.00142857142857143
Chr1	580023	580790	768	Unspecified	0.308718246073298	767	0.21251629726206	77.7158774373259	Core	1.23249299719888	5.03065184543009	5.03065184543009	5.03065184543009	0	598.815451754674	248.679984733159	35.2357191534699	0	0.0526315789473684
Chr1	3761516	3761972	457	LTR/Gypsy	0.144117796610169	456	0.506578947368421	94.1860465116279	Core	-0.177142857142857	5.03065184543009	5.03065184543009	5.03065184543009	331.083483329632	251.066243588966	249.108552080435	795.5847289871	0.00672645739910314	0.00220994475138122
Chr3	3899450	3899656	207	Unspecified	0.275087058823529	206	0.480582524271845	80.2083333333333	Core	-0.35	5.5843633942872	5.62691881982771	5.66038507663811	16.3298628634128	0.854669615688909	249.447667522858	886.777394488777	0.00380952380952381	0.00248447204968944
Chr1	3081430	3086320	4891	LTR/Copia	0.0845495075913008	4834	0.25424079437319	92.7536231884058	Core	1.35483554955169	5.03065184543009	5.03065184543009	5.03065184543009	714.168465563632	934.522399571596	249.447842856972	103.837327959292	0.0118373648996397	0.00869565217391304
Chr1	3020370	3024823	4454	LTR/Gypsy	0.09291440625	4453	0.267011003817651	92.0234339792699	Core	1.35050081447337	5.03065184543009	5.03065184543009	5.03065184543009	3980.00059476392	1468.63992525767	249.579175472425	100.032402152001	0.0120361083249749	0.00707547169811321
Chr8	3132810	3132981	172	LTR/Copia	0.231466477272727	171	0.555555555555556	85.1851851851852	Core	-0.454545454545455	5.48009788457393	5.69584111251051	5.48540311040818	0	0	250.153603917708	1207.10380368473	0.0078125	0.0011001100110011
Chr3	3973615	3973997	383	DNA/Tc1-Mariner	0.218548727272727	382	0.573298429319372	83.288409703504	Core	-0.653846153846154	5.13283576313994	5.23020120223024	5.46555974745766	0	0.459861604242064	250.446619136717	674.034772421569	0.00253485424588086	0.00423280423280423
Chr1	9214094	9214421	328	DNA/Mite	0.218088945783133	327	0.418960244648318	83.9116719242902	Core	0.151544401544402	6.20007704345595	7.67835243905333	5.51816062281016	0	149.409881589297	250.654596026147	686.695973094492	0.00395256916996047	0.00150829562594268
Chr6	2303892	2305712	1821	LTR/Gypsy	0.0841940011580776	1714	0.191365227537923	92.7570093457944	Core	1.1872332859175	5.03065184543009	5.03065184543009	5.10018468709118	3.68072774821288	872.087209231288	250.694601902546	40.1502376901228	0	0.0149253731343284
Chr1	4811325	4812003	679	DNA/Mite	0.122659507154213	623	0.465489566613162	89.4060995184591	Core	0.72962962962963	6.37252591195866	6.30673427357661	5.22822020606754	0	114.906984372237	252.040818137237	597.432042925484	0.0772138228941685	0.0165137614678899
Chr3	4043326	4043635	310	LTR/Gypsy	0.277647648902821	309	0.469255663430421	81.0169491525424	Core	-0.277432712215321	5.5557768793259	5.68229578571649	6.71759402138116	0	80.7773782880004	252.180715337241	710.074438513581	0.00308641975308642	0.00391389432485323
Chr5	2374508	2374984	477	LTR/Gypsy	0.051792828685259	476	0.51890756302521	100	Core	-0.378662244333886	5.03065184543009	5.03065184543009	5.03065184543009	0	233.855599897026	252.67799000335	713.620401991037	0.0068241469816273	0.00621468926553672
Chr7	3054129	3054235	107	DNA/Mite	0.0676457943925234	106	0.471698113207547	94.3396226415094	Core	0.166666666666667	5.30376646722054	5.5001626454156	5.47103850201073	0	0	252.713223635087	536.787064952553	0.00318471337579618	0.00459770114942529
Chr1	2926720	2934291	7572	LTR/Gypsy	0.0896077165883143	7411	0.21076777762785	91.9918973666442	Core	1.23968123754834	5.03065184543009	5.03065184543009	5.03065184543009	156.546650990471	723.626860577981	252.982944765757	36.9654701500667	0.0089662447257384	0.00564971751412429
Chr1	3734909	3735385	477	LTR/Gypsy	0.051792828685259	476	0.51890756302521	100	Core	-0.378662244333886	5.03065184543009	5.03065184543009	5.03065184543009	0	422.341737984377	253.04794313659	691.058632841438	0.00266808964781217	0.00297619047619048
Chr1	3047455	3047791	337	LTR/Gypsy	0.0762569411764706	336	0.30952380952381	93.75	Core	1.55703211517165	5.03065184543009	5.03065184543009	5.03065184543009	0	1465.98800363905	253.887239797077	113.74424247891	0.0121951219512195	0
Chr1	3086419	3086572	154	LTR/Copia	0.194010658682635	153	0.457516339869281	88.8888888888889	Core	2.25	5.03065184543009	5.03065184543009	5.03065184543009	0	2326.10706127858	254.342779102933	305.52395723416	0	0
Chr1	67298	67935	638	Unspecified	0.179578466165414	637	0.392464678178964	87.5	Core	0.673655913978495	5.13283576313994	5.03065184543009	5.09975004453444	5400.40889317863	1590.63959748819	254.473658749126	204.076799042718	0.00977198697068404	0.0106666666666667
Chr2	3801078	3813298	12221	LTR/Copia	0.0779205123113582	5028	0.175616547334924	92.831541218638	Core	1.14364606602135	5.03065184543009	5.03065184543009	5.03065184543009	181.09322099245	234.011184732696	254.567206437424	326.105246638035	0.0311377245508982	0.0188679245283019
Chr8	1530203	1537581	7379	LTR/Gypsy	0.131609669001511	7250	0.282758620689655	88.4860226958206	Core	1.39020979020979	5.03065184543009	5.03065184543009	5.03065184543009	647.107063963868	895.868004646341	255.266157449929	100.723093939742	0.0117999625398015	0.0098159509202454
Chr1	3090778	3092474	1697	LTR/Gypsy	0.114986375074895	1657	0.1985515992758	90.0786448880823	Core	1.20376175548589	5.13159268805071	5.03065184543009	5.03065184543009	0	545.985136615993	255.349509974362	31.3789272669509	0.0297297297297297	0.142857142857143
Chr5	2020659	2026301	5643	LTR/Gypsy	0.134317263875365	5119	0.296346942762258	88.1292850146915	Core	1.40693312170839	5.03065184543009	5.03065184543009	5.10471848180467	0	642.343835494199	255.66345473148	169.857279017959	0.031750063500127	0.0186513629842181
Chr1	3048978	3049084	107	LTR/Gypsy	0.0676457943925234	106	0.30188679245283	94.3396226415094	Core	1.33333333333333	5.03065184543009	5.03065184543009	5.03065184543009	0	3934.65471931297	256.060418650121	113.405717947723	0.00833333333333333	0
Chr5	3448148	3450010	1863	DNA/Tc1-Mariner	0.00321132904608789	1862	0.547261009667025	99.8925886143931	Core	-0.621095674450685	6.87777875894769	6.08508075142064	6.16371217110353	419.127296975234	146.774925215528	256.556832311674	511.026518382376	0.00285714285714286	0.00357191921967303
Chr1	8155926	8156027	102	Unspecified	0.174867407407407	101	0.465346534653465	89.1089108910891	Core	1.5	5.03065184543009	5.81872012579704	5.09975004453444	0	1.75207271216226	256.562497902376	1143.12963691304	0.00581395348837209	0.00571428571428571
Chr6	2303584	2303779	196	LTR/Gypsy	0.134013819095477	195	0.276923076923077	89.2307692307692	Core	1.4	5.03065184543009	5.03065184543009	5.03065184543009	0	1192.13194848154	257.25091584619	96.1610340329915	0.012987012987013	0
Chr8	1682176	1682417	242	Unspecified	0.220664938271605	241	0.369294605809129	83.982683982684	Core	0.00378787878787867	5.27123217027093	5.14160453308651	5.39839042859983	0	0	257.734016157638	583.80318551838	0.0100334448160535	0.00381679389312977
Chr5	1516897	1517084	188	Unspecified	0.123703886010363	187	0.497326203208556	91.8918918918919	Core	0.306060606060606	5.13159268805071	5.14160453308651	5.03065184543009	0	0	257.922970714939	725.55271160102	0.00505050505050505	0.00202634245187437
Chr7	2026782	2028650	1869	LTR/Copia	0.0623136166756903	1826	0.221248630887185	95.0684931506849	Core	1.3015823766677	5.03065184543009	5.03065184543009	5.03065184543009	5.37914604231326	701.392150546371	258.650147198175	49.1100819286201	0.00549450549450549	0
Chr7	2028687	2029328	642	Unspecified	0.0961708370702541	641	0.258970358814353	94.5397815912636	Core	1.33229036295369	5.03065184543009	5.03065184543009	5.03065184543009	0	903.138730847392	258.923839385639	47.1342515220222	0.00613496932515337	0
Chr1	4282681	4282880	200	Unspecified	0.21975046728972	199	0.407035175879397	85.8585858585859	Core	0.350383631713555	5.03065184543009	5.03065184543009	5.03065184543009	0	0.884885208162759	259.154038285229	509.180218462249	0.00602409638554217	0
Chr8	747199	747652	454	LTR/Gypsy	0.143405555555556	453	0.509933774834437	93.9252336448598	Core	-0.217971014492754	5.03065184543009	5.03065184543009	5.03065184543009	288.843481400409	207.767914539596	259.315047431333	785.058609421292	0.00353857041755131	0.00773053561568194
Chr1	4434836	4435312	477	LTR/Gypsy	0.216989482071713	476	0.367647058823529	84.453781512605	Core	1.36688311688312	5.03065184543009	5.03065184543009	5.03065184543009	7.04762502526235	795.994297441298	259.707099534922	161.274868365656	0.0164609053497942	0.0149253731343284
Chr5	3605641	3606739	1099	LINE/I	0.275535089285714	1068	0.537453183520599	80.6698564593301	Core	-0.388	6.2333385544026	6.62268349129591	5.76674085447127	0	35.9358578155432	259.987346621269	563.358669057533	0.00265957446808511	0.00200445434298441
Chr6	1068615	1068878	264	DNA/Mite	0.122405190839695	263	0.304182509505703	89.5752895752896	Core	0.715651135005974	5.27247524536016	5.71837058347095	5.2023543974499	0	106.328076806794	260.238024642168	507.512230128644	0.0131578947368421	0.0106382978723404
Chr7	1989061	1989208	148	LTR/Copia	0.188322125	147	0.442176870748299	89.7260273972603	Core	2.29166666666667	5.03065184543009	5.03065184543009	5.03065184543009	0	919.238148983763	261.184378142314	146.806032137805	0	0
Chr4	2885602	2885786	185	LTR/Gypsy	0.196175531914894	184	0.21195652173913	85.5555555555556	Core	1.48148148148148	5.03065184543009	5.03065184543009	5.03065184543009	0	801.35784703815	261.190955271526	91.0963963842361	0	0
Chr8	2914861	2915628	768	Unspecified	0.312158144192256	767	0.143415906127771	77.524893314367	Core	1.14912280701754	5.03065184543009	5.03065184543009	5.03065184543009	2058.39413678436	253.432971942009	261.526921213839	9.32710212885969	0.0869565217391304	0
Chr4	1233088	1234818	1731	DNA/hAT	0.289038506437768	1645	0.498480243161094	78.2764811490126	Core	-0.309386973180077	9.93107841484786	9.80532219140297	11.5847395874164	0	58.4699800415053	261.609715648731	441.226295335066	0.00257614790119715	0.00234907211651398
Chr4	3018093	3018252	160	LTR/Gypsy	0.122885766871166	159	0.257861635220126	90.5660377358491	Core	1.19130434782609	5.03065184543009	5.03065184543009	5.03065184543009	0	2176.78400884463	262.4794065587	183.387094529387	0	0
Chr8	1072778	1072971	194	Unspecified	0.231627575757576	193	0.512953367875648	85.6353591160221	Core	0.523026315789474	5.13159268805071	5.11186440223292	5.03065184543009	0	949.951923625477	262.676358797025	824.849401635388	0.00380952380952381	0
Chr1	2974931	2975113	183	LTR/Gypsy	0.139478125	182	0.406593406593407	92.2222222222222	Core	2.03921568627451	5.03065184543009	5.03065184543009	5.03065184543009	0	2322.22234059518	263.106171692818	186.398901046671	0	0
Chr5	1708375	1708562	188	Unspecified	0.246842871287129	187	0.540106951871658	85.6353591160221	Core	0.0611111111111111	5.54772978254547	5.45442699570274	5.48084779353539	0	0	263.591607433948	885.601103865951	0	0.00742115027829314
Chr1	3754293	3766068	11776	LTR/Copia	0.0798409105824446	4840	0.198140495867769	93.1141439205955	Core	1.17866313905533	5.03065184543009	5.03065184543009	5.03065184543009	170.593947018836	210.281463356251	263.78563330432	340.284576981068	0.0488888888888889	0.0540540540540541
Chr8	515923	516079	157	LTR/Copia	0.149542545454545	156	0.532051282051282	92.156862745098	Core	0.448717948717949	5.31278360448795	5.85318946523905	5.74999561750996	0	163.90357629905	265.292198449651	857.85938254003	0.0131578947368421	0.00325732899022801
Chr3	2385998	2386638	641	LTR/Gypsy	0.121873993174061	578	0.217993079584775	89.7923875432526	Core	1.24365045200172	5.03065184543009	5.03065184543009	5.03065184543009	0	1297.74024204444	265.379135288221	63.3581241116384	0.00961538461538462	0
Chr8	1302290	1302579	290	LTR/Copia	0.19342468852459	289	0.42560553633218	86.5051903114187	Core	0.739130434782609	5.03065184543009	5.10919404715617	5.2433495225701	0	417.333986299761	265.422104707795	519.579322333402	0.0202020202020202	0.00760456273764259
Chr4	2888445	2890628	2184	LTR/Copia	0.0736643156424581	2133	0.223159868729489	93.5771214252227	Core	1.21766707920792	5.03065184543009	5.03065184543009	5.03065184543009	1.53419884830413	449.099114533618	265.604986653578	51.1157303398649	0.00963391136801541	0.0204081632653061
Chr2	3652746	3661600	8855	LTR/Copia	0.0442151974012994	1980	0.211111111111111	96.7155128852956	Core	1.3641975308642	5.03065184543009	5.11186440223292	5.03065184543009	242.384008761635	180.629929333615	265.82467764264	451.035279446437	0.05	0.0476190476190476
Chr1	2920633	2923093	2461	LTR/Copia	0.0856533975903614	2460	0.232520325203252	93.1132844335778	Core	1.26503896103896	5.03065184543009	5.03065184543009	5.03065184543009	175.617414974766	588.964336670731	265.842694768683	44.5505992425783	0.0210803689064559	0.0235294117647059
Chr5	1959614	1960093	480	LTR/Gypsy	0.273454336633663	479	0.298538622129436	80.2521008403361	Core	1.30132309005548	5.03065184543009	5.03065184543009	5.03065184543009	0	1325.05080637376	266.90028869881	152.789293636681	0.0091324200913242	0
Chr7	3055599	3060052	4454	LTR/Copia	0.0808719750807568	4314	0.158089939731108	93.1066604564509	Core	1.14230769230769	5.03065184543009	5.03065184543009	5.03065184543009	1.50387326460001	404.527300276638	267.222998252146	14.7998028139323	0.0327380952380952	0.0416666666666667
Chr6	2333391	2333532	142	LTR/Gypsy	0.26134475862069	141	0.219858156028369	79.4326241134752	Core	1.14285714285714	5.03065184543009	5.03065184543009	5.03065184543009	0	215.254647494221	267.357201825862	178.614005767663	0	0
Chr8	1523887	1524574	688	LTR/Gypsy	0.0971284470246734	687	0.222707423580786	91.1208151382824	Core	1.32380952380952	5.03065184543009	5.03065184543009	5.03065184543009	0	852.028362649171	267.434050691003	74.0608770270841	0.0109289617486339	0
Chr8	1098332	1101884	3553	LTR/Copia	0.0797186063427408	3415	0.165739385065886	92.9721815519766	Core	1.08388319407356	5.03065184543009	5.03065184543009	5.03065184543009	916.330181403443	548.219653754855	268.119652506737	18.6667536300884	0.0347222222222222	0
Chr1	3766069	3766520	452	LTR/Gypsy	0.148268902953586	451	0.509977827050998	93.5334872979215	Core	-0.218823529411765	5.03065184543009	5.03065184543009	5.03065184543009	282.688070457745	228.937501055869	268.277680454996	684.466510991143	0.00290909090909091	0.00170164492342598
Chr2	2140940	2141068	129	Unspecified	0.33980358778626	128	0.5390625	74.0157480314961	Core	-1.37142857142857	5.03065184543009	5.03065184543009	5.13529487615267	0	0	268.434497859244	706.330101548413	0.0048661800486618	0.0101010101010101
Chr1	7105712	7106896	1185	Unspecified	0.235700953947368	1184	0.214527027027027	82.6424870466321	Core	1.16452221650369	5.03065184543009	5.03065184543009	5.03065184543009	1635.60900311562	704.976002526828	269.013469181674	26.5060701712132	0.0116731517509728	0
Chr5	2038868	2039857	990	LTR/Copia	0.108512902584493	989	0.26592517694641	91.4807302231237	Core	1.41996233521657	5.03065184543009	5.03065184543009	5.03065184543009	4824.91251729499	533.069896028316	269.283194099189	98.8282623005963	0.010752688172043	0
Chr1	7155434	7155555	122	Unspecified	0.282563548387097	121	0.206611570247934	79.4871794871795	Core	1.55555555555556	5.03065184543009	5.03065184543009	5.03065184543009	0	2479.1828877096	269.449198710258	99.2300032042572	0	0
Chr3	2539414	2541266	1853	LTR/Gypsy	0.130453030821918	1749	0.20926243567753	89.9824253075571	Core	1.18574795647159	5.03065184543009	5.03065184543009	5.03065184543009	269.473614890839	314.256153667137	269.904894628026	44.6025730231993	0.0281456953642384	0
Chr5	521915	522391	477	LTR/Gypsy	0.051792828685259	476	0.51890756302521	100	Core	-0.378662244333886	5.03065184543009	5.11186440223292	5.09975004453444	0	261.151048465449	270.805693532141	701.086085796815	0.0189959294436906	0.0153172866520788
Chr8	1548798	1556312	7515	LTR/Copia	0.0976263069705094	7440	0.260215053763441	91.3283884018881	Core	1.33306069271529	5.03065184543009	5.03065184543009	5.03065184543009	41.8842615969605	964.701076587466	270.994486332998	88.0694344956724	0.0156718906302101	0.0068649885583524
Chr5	1868738	1876322	7585	LTR/Gypsy	0.0891707415368082	7414	0.202994335041813	92.0313344138304	Core	1.20566801619433	5.03065184543009	5.03065184543009	5.03065184543009	8.38781693960078	548.218768844442	271.042018598396	36.378663973076	0.00964436407474382	0.00757575757575758
Chr6	2796058	2796184	127	Unspecified	0.0965702325581395	126	0.420634920634921	92.8571428571429	Core	1.92105263157895	5.6314777414579	5.56029521370857	5.68085474013249	0	576.081507758952	271.323627918678	1127.25283640036	0	0
Chr7	3112017	3115209	3193	Unspecified	0.244522433764633	3192	0.201754385964912	81.6484224082421	Core	1.24380952380952	5.03065184543009	5.03065184543009	5.03065184543009	1069.01494918603	340.750963700376	271.824542837975	27.6139902367222	0.0160427807486631	0.0191082802547771
Chr7	1945126	1945761	636	Unspecified	0.0989714501510574	635	0.302362204724409	94.1732283464567	Core	1.49076086956522	5.03065184543009	5.10919404715617	5.03065184543009	0	734.820400889504	271.90680009748	125.211360510104	0.0285171102661597	0
Chr6	3380927	3381043	117	Unspecified	0.249857952755905	116	0.508620689655172	85.8407079646018	Core	-0.458333333333333	5.17489244698057	5.66561710721576	5.3529707897117	0	1.52354148883675	271.995977526045	593.654280039382	0	0
Chr6	2214017	2217906	3890	LTR/Copia	0.0761885019646365	2022	0.237883283877349	93.4621099554235	Core	1.28971962616822	5.03065184543009	5.10919404715617	5.03065184543009	68.8811087860003	689.473058026817	272.133928045234	212.650305220646	0.0146892655367232	0
Chr6	1309413	1309601	189	Unspecified	0.278006403940887	188	0.521276595744681	82.5136612021858	Core	0.5	5.34387034591997	5.39053141087823	6.82895210146129	0	92.7567906438845	272.518952427255	834.168796989798	0.00318979266347687	0.00124688279301746
Chr4	961039	962471	1433	Unspecified	0.0265375069252078	1432	0.570530726256983	98.1843575418994	Core	-0.578544061302682	5.13283576313994	5.81722019194062	5.2277855635108	4.67871682320002	51.3010808103416	272.617455627005	700.365501301885	0.00416440340394713	0.00202685583987839
Chr4	2930332	2930997	666	LTR/Gypsy	0.0988402548725637	665	0.222556390977444	90.9774436090226	Core	1.19397759103641	5.03065184543009	5.03065184543009	5.03065184543009	5.04159922740906	1682.9397226161	273.648315348095	75.3191590586531	0.00675675675675676	0
Chr6	431141	432998	1858	DNA/Tc1-Mariner	0.000538213132400431	1857	0.510500807754443	100	Core	-0.400212089077413	5.03065184543009	5.03065184543009	5.03065184543009	140.686695682096	261.961302599692	274.101186609655	346.449580152795	0.00269794721407625	0.00204956213899758
Chr5	1997587	2004499	6913	LTR/Gypsy	0.0846455406380829	6912	0.276331018518519	92.2920892494929	Core	1.41259585345072	5.03065184543009	5.03065184543009	5.03065184543009	3.39073263044383	1048.12533843039	274.538039402338	129.913625957476	0.0119953188999415	0.00454545454545455
Chr1	570524	571384	861	Unspecified	0.240928728323699	860	0.148837209302326	81.9830713422007	Core	1.03339755940912	5.03065184543009	5.03065184543009	5.03065184543009	1835.54122092761	596.398208424035	274.945378650545	25.8760427447656	0.0136986301369863	0
Chr4	2974279	2974755	477	LTR/Gypsy	0.051792828685259	476	0.51890756302521	100	Core	-0.378662244333886	5.03065184543009	5.03065184543009	5.03065184543009	0	732.919679803456	275.245131131028	649.277578860698	0.00186799501867995	0.00441826215022091
Chr1	4416590	4416785	196	Unspecified	0.219433571428571	195	0.348717948717949	85.6410256410256	Core	-0.0838509316770186	5.03065184543009	5.20046107137664	5.27392591691811	0	561.747024208726	275.367177525499	419.425786739644	0	0.0161290322580645
Chr1	53543	59523	5981	LTR/Gypsy	0.332347536256324	5980	0.2438127090301	73.7643235847443	Core	1.29338503457033	5.03065184543009	5.03065184543009	5.03065184543009	0.559896619334273	855.523713523621	275.480195849741	63.0664010998791	0.0262159365298379	0.0151057401812689
Chr2	521185	530985	9801	LTR/Gypsy	0.0923438446680899	9799	0.242167568119196	91.71434409481	Core	1.25698664469393	5.03065184543009	5.03065184543009	5.03065184543009	360.41852135775	754.487317431483	276.064170142409	68.0098685090102	0.01419185282523	0.010989010989011
Chr7	3102944	3103719	776	Unspecified	0.261533778371162	775	0.230967741935484	82.0402298850575	Core	1.2969696969697	5.03065184543009	5.03065184543009	5.03065184543009	0	448.65737926429	276.07872061988	43.5894070923094	0.0144927536231884	0.0666666666666667
Chr5	2136717	2137356	640	Unspecified	0.131256986506747	639	0.336463223787167	91.2363067292645	Core	1.29945205479452	5.1295646765902	5.1977907162999	5.3026420836662	10.4941124984314	282.034275139599	276.261632451672	200.326401453109	0.0551724137931035	0.0207253886010363
Chr3	156721	158006	1286	Unspecified	0.252327953125	1285	0.190661478599222	81.8031430934657	Core	1.25140901771337	5.03065184543009	5.03065184543009	5.09975004453444	33.8933680147936	236.065871654261	276.319551095089	150.545207353499	0.0619469026548673	0
Chr4	1209077	1210197	1121	LINE/I	0.174982396475771	1120	0.541964285714286	85.6373429084381	Core	-0.438107489994282	5.34387034591997	5.27104724132673	6.15047663341787	0	272.596835734987	276.86148579449	485.597406207786	0.00305220883534137	0.00366636113657195
Chr1	2919808	2919967	160	LTR/Gypsy	0.142308036809816	159	0.289308176100629	89.8089171974522	Core	1.27894736842105	5.03065184543009	5.03065184543009	5.03065184543009	0	1194.29260189795	276.938017936933	226.093678186915	0	0
Chr7	1201683	1201793	111	Unspecified	0.296425	110	0.463636363636364	80.188679245283	Core	-0.452380952380952	6.37757189096007	6.83214905541752	5.64124242211213	0	1.60740615794703	277.295146658343	717.369197476648	0	0.009375
Chr3	2765378	2771359	5982	LTR/Gypsy	0.306969956390473	5981	0.261829125564287	75.390625	Core	1.41052721233285	5.03065184543009	5.03065184543009	5.03065184543009	2198.90614918637	466.232994458831	277.432370767437	67.8348249329437	0.0471649484536082	0.023121387283237
Chr1	701259	701458	200	Unspecified	0.166843	199	0.57286432160804	92.9292929292929	Core	0.378787878787879	5.03065184543009	5.19040660395899	5.10018468709118	0	215.02710558355	277.791828709851	851.974774986047	0.00148588410104012	0.0046029919447641
Chr2	3913310	3913452	143	DNA/Mite	0.285502083333333	142	0.352112676056338	77.3049645390071	Core	0.53475935828877	5.03065184543009	5.11924851457382	5.03065184543009	0	2.48520952079754	277.924011620664	396.920012817029	0	0.00543478260869565
Chr7	779063	779254	192	Unspecified	0.214923671497585	191	0.56020942408377	86.8421052631579	Core	0.267676767676768	5.27380527814068	5.35964391047046	5.52174622677193	0	246.212323235434	278.389732763574	729.079391963911	0	0.00308959835221421
Chr1	2902100	2902253	154	LTR/Copia	0.120735568862275	153	0.568627450980392	96.078431372549	Core	0.6	5.57850027668128	5.98170515451112	5.72707974714906	44.0476564078897	1.15267941589623	278.620953471849	1316.10320039331	0	0
Chr6	3229447	3229593	147	LTR/Copia	0.121736075949367	146	0.561643835616438	95.2054794520548	Core	-0.242857142857143	6.71622908228566	6.22993336989749	7.91172662606853	0	1.20832600838777	278.740550389922	1289.30569680566	0	0
Chr4	2888858	2889625	768	Unspecified	0.287563174603175	767	0.251629726205997	79.8295454545455	Core	1.32522522522523	5.03065184543009	5.03065184543009	5.03065184543009	0	434.358496135266	278.962049294762	57.5171297946347	0	0.0454545454545455
Chr7	1990625	1991276	652	Unspecified	0.112584579025111	651	0.273425499231951	93.0555555555556	Core	1.44413549039434	5.1295646765902	5.03065184543009	5.10018468709118	14616.2321773922	1628.61897336683	279.001578330087	112.969542109462	0.0045662100456621	0
Chr1	558076	561558	3483	Unspecified	0.22100866061294	3482	0.168868466398621	83.4221432800474	Core	1.16624177760992	5.03065184543009	5.03065184543009	5.03065184543009	1695.44883274356	673.548894977173	279.114813272489	49.7147732227017	0.013550135501355	0.0384615384615385
Chr2	667901	670870	2970	LTR/Copia	0.0586834071550256	2919	0.195614936622131	94.9245541838134	Core	1.22927784577723	5.03065184543009	5.03065184543009	5.03065184543009	3360.02884143257	362.516122823061	279.222376607929	27.0140979073584	0.0171990171990172	0
Chr8	1310028	1311343	1316	LTR/Gypsy	0.210793963515755	1315	0.20532319391635	83.704974271012	Core	1.30010893246187	5.03065184543009	5.03065184543009	5.03065184543009	0	416.283942722267	279.63980271151	64.6429853446303	0.0696969696969697	0
Chr3	3736830	3737088	259	DNA/Mite	0.100973793103448	258	0.310077519379845	91.4728682170543	Core	0.604838709677419	5.03065184543009	5.03065184543009	5.09975004453444	0	0	279.66009712188	688.818388001536	0.00609756097560976	0.0050125313283208
Chr3	2760159	2764905	4747	LTR/Gypsy	0.334146124473097	4027	0.197665756146014	73.6299648064354	Core	1.22645457997553	5.03065184543009	5.03065184543009	5.03065184543009	62.0844522773375	235.615932061273	280.016318062253	39.4828758797972	0.0463458110516934	0
Chr7	1982593	1983696	1104	LTR/Gypsy	0.100170471111111	1103	0.311876699909338	92.2867513611615	Core	1.5033422459893	5.03065184543009	5.03065184543009	5.03065184543009	710.838041341116	2142.2348206601	280.335175964235	162.802037924952	0.0132450331125828	0
Chr1	4272641	4274462	1822	LTR/Gypsy	0.205859319429199	1821	0.332784184514003	82.466814159292	Core	1.64511250347233	5.03065184543009	5.03065184543009	5.03065184543009	0	193.016801532161	280.391951644024	170.544752759844	0.0492512479201331	0.0278481012658228
Chr6	2169589	2171358	1770	LTR/Copia	0.161545444382337	1769	0.210288298473714	86.5909090909091	Core	1.28798321845969	5.03065184543009	5.03065184543009	5.03065184543009	4406.06116009508	538.009205561591	280.886079414909	70.4937126835673	0.0103092783505155	0.0212765957446809
Chr4	2321894	2325098	3205	Unspecified	0.233860497667185	3204	0.241573033707865	82.4829379265518	Core	1.31891898262735	5.03065184543009	5.03065184543009	5.03065184543009	1.04515200967831	310.482819676335	281.175353959618	57.9951813919355	0.0563271604938272	0.0608695652173913
Chr2	3788253	3788567	315	Unspecified	0.0990955792682927	314	0.286624203821656	95.1768488745981	Core	1.31707317073171	5.03065184543009	5.03065184543009	5.03065184543009	0	477.481796637192	281.276667357632	131.883965920035	0.0493827160493827	0
Chr3	1743294	1745151	1858	DNA/Tc1-Mariner	0.00107792249730893	1857	0.511039310716209	99.9461497038234	Core	-0.394765723934149	5.03065184543009	5.03065184543009	5.03065184543009	129.864642168089	277.914981929187	281.580977194168	340.461562718055	0.00189035916824197	0.00288086764955092
Chr5	566023	569342	3320	Unspecified	0.0237985641639246	3319	0.527267249171437	98.431845597105	Core	-0.767019733661495	6.65240119544355	5.67461450410734	6.26956078685044	1.00892763321266	34.2176949210713	281.969402848773	292.366639941175	0.00267965895249695	0.0046138902379796
Chr1	4261790	4265812	4023	LTR/Gypsy	0.178345436893204	4022	0.379164594728991	84.7662141779789	Core	1.49436205417331	5.17029132765031	5.03065184543009	5.03065184543009	1.66506932951983	343.486426012811	282.230722176646	216.277480249219	0.0593302465812426	0.0293303818483675
Chr1	2898889	2899138	250	DNA/Mite	0.126413928571429	249	0.289156626506024	89.8785425101215	Core	0.481481481481482	5.03065184543009	5.03065184543009	5.03065184543009	0	0	282.723256360606	401.721464584977	0.00840336134453782	0
Chr1	8755699	8755915	217	DNA/Mite	0.190507792207792	216	0.435185185185185	88.7323943661972	Core	-0.290060851926978	5.13159268805071	5.34902897245022	5.58795219910259	0	2.44475262162176	282.799057898128	862.147190630477	0.0015220700152207	0.00361881785283474
Chr1	554671	556528	1858	DNA/Tc1-Mariner	0.000538213132400431	1857	0.510500807754443	100	Core	-0.400212089077413	5.03065184543009	5.03065184543009	5.03065184543009	165.938153881446	279.330988970266	282.906509702815	359.067188318853	0.00482614895250631	0.00428669410150892
Chr2	595939	596986	1048	LTR/Gypsy	0.0981460869565217	1004	0.207171314741036	91.4342629482072	Core	1.18261589403974	5.03065184543009	5.03065184543009	5.03065184543009	9.60121000095492	1129.96964782473	283.24757816038	63.7500594199434	0.0141843971631206	0
Chr2	663240	665097	1858	DNA/Tc1-Mariner	0.000538213132400431	1857	0.510500807754443	100	Core	-0.400212089077413	5.03065184543009	5.03065184543009	5.03065184543009	158.723451538775	344.939315206946	283.569275957139	366.766067877804	0.0035953978906999	0.00385133834007318
Chr7	2031194	2031831	638	Unspecified	0.0841206325301205	637	0.276295133437991	95.6043956043956	Core	1.3930799773114	5.03065184543009	5.03065184543009	5.03065184543009	5.26355642610002	1150.96852066257	283.761615130676	91.1168582881859	0.00476190476190476	0
Chr6	2189534	2189731	198	LTR/Gypsy	0.143847609756098	197	0.218274111675127	89.8477157360406	Core	1.4	5.03065184543009	5.03065184543009	5.03065184543009	0	1348.91720543513	284.212719580142	91.1295947794199	0	0
Chr1	551183	558085	6903	LTR/Copia	0.0774856443455391	4902	0.165238678090575	93.4245456401879	Core	1.17262882905659	5.03065184543009	5.03065184543009	5.03065184543009	267.770943576842	422.74688784544	284.663148288085	111.926727277487	0.0195439739413681	0
Chr5	2153665	2155327	1663	Unspecified	0.0763803915662651	1662	0.240673886883273	92.9909365558912	Core	1.25588049856928	5.03065184543009	5.03065184543009	5.03065184543009	4.03085115833789	608.53145553667	284.909572072897	55.6787254583791	0.024045261669024	0.0303030303030303
Chr8	1101884	1108730	6847	LTR/Gypsy	0.340684807467911	6846	0.235173824130879	73.0406599882145	Core	1.26111997606463	5.03065184543009	5.03065184543009	5.03065184543009	824.06762302328	753.071311388253	286.119158982357	57.2330244923897	0.0227670753064799	0.0235849056603774
Chr4	574905	575062	158	Unspecified	0.249186511627907	157	0.592356687898089	84.6153846153846	Core	-1.04285714285714	5.03065184543009	5.11186440223292	5.03065184543009	0	0	286.120804650525	1020.28798166429	0	0.00230149597238205
Chr4	3991080	3991556	477	LTR/Gypsy	0.051792828685259	476	0.51890756302521	100	Core	-0.378662244333886	5.13159268805071	5.03065184543009	5.03065184543009	7.04762502526235	236.806459201721	286.343725128247	673.510590169527	0.00484554815263477	0.0020979020979021
Chr5	2039859	2041158	1300	LTR/Copia	0.0506408993902439	1299	0.217090069284065	95.9969207082371	Core	1.40005222613918	5.03065184543009	5.03065184543009	5.03065184543009	1519.06725072633	737.544321976472	286.471413112601	64.5224365981457	0.0483870967741935	0
Chr6	3094509	3094717	209	Unspecified	0.228816470588235	208	0.485576923076923	86.9346733668342	Core	1.125	5.13283576313994	5.03065184543009	5.03065184543009	3153.5568500721	393.581551282827	286.937079911995	575.246395386998	0.01171875	0.00477326968973747
Chr7	436800	437022	223	DNA/Mite	0.212438095238095	222	0.477477477477477	84.5454545454545	Core	-0.6125	5.17029132765031	5.8719353403142	5.29325941886238	0	123.675720858513	287.04847747709	653.750609345694	0.0065359477124183	0.00325732899022801
Chr3	134929	135574	646	Unspecified	0.112961661721068	645	0.305426356589147	93.167701863354	Core	1.45794871794872	5.03065184543009	5.03065184543009	5.03065184543009	5.19817063198698	962.551747768647	287.0583550937	111.556711676836	0.0163934426229508	0.0166666666666667
Chr1	3007461	3009089	1629	LTR/Gypsy	0.0912694716242661	1521	0.242603550295858	92.0447074293228	Core	1.31785714285714	5.03065184543009	5.03065184543009	5.03065184543009	2890.8474193205	1179.92997585507	287.731219915607	85.8732910335551	0.00381679389312977	0
Chr1	630087	630759	673	LTR/Copia	0.0944329896907217	672	0.141369047619048	91.9642857142857	Core	1.07382920110193	5.03065184543009	5.03065184543009	5.03065184543009	4.98900430253296	335.792177025435	287.816370163844	6.50688545601687	0.0133333333333333	0
Chr1	632236	641655	9420	LTR/Copia	0.0747301265060241	1641	0.193174893357709	94.0745265729994	Core	1.31563031563032	5.34387034591997	5.54375994608055	5.50388265414672	101.658511327446	920.703234207078	287.829272759686	90.2742267417791	0.062992125984252	0.0227272727272727
Chr8	1053906	1054543	638	Unspecified	0.120223303167421	637	0.23861852433281	92.2834645669291	Core	1.33333333333333	5.03065184543009	5.03065184543009	5.03065184543009	73.6897899654004	341.874565376316	287.906137260141	40.5657245803567	0.0180722891566265	0.0909090909090909
Chr1	5593493	5600321	6829	LTR/Gypsy	0.31219827747695	6826	0.260181658365075	74.9076400177331	Core	1.3271953010279	5.03065184543009	5.03065184543009	5.03065184543009	742.390440444913	395.942255796681	288.006102785845	66.5700036143984	0.0484185864896525	0.0240384615384615
Chr8	1306469	1309552	3084	LTR/Gypsy	0.380835618235487	3083	0.167045085955238	70.4966887417219	Core	1.16653352505725	5.03065184543009	5.03065184543009	5.03065184543009	21.7236981635277	333.814762031694	288.451209605958	27.5603123760039	0.0252365930599369	0.037037037037037
Chr1	550543	551183	641	Unspecified	0.144373755656109	640	0.2046875	89.937106918239	Core	1.13	5.03065184543009	5.03065184543009	5.03065184543009	1812.64033317976	762.521785997379	288.479495251134	45.3445398053883	0	0
Chr1	4189651	4189887	237	Unspecified	0.308333021276596	236	0.419491525423729	77.4774774774775	Core	-0.0909090909090908	5.23174859430004	5.76278432869632	5.64005231075834	0	317.609776757925	288.642157360295	630.004956513837	0.00454545454545455	0.00204918032786885
Chr2	3789229	3794358	5130	LTR/Copia	0.0543009071189115	5035	0.192452830188679	95.4112038140644	Core	1.24355021071025	5.03065184543009	5.03065184543009	5.03065184543009	426.286484440474	524.323475835454	288.813061291383	23.7625670699742	0.035230352303523	0.0166666666666667
Chr1	7133173	7136584	3412	Unspecified	0.220251012987013	3411	0.19613016710642	83.6654589371981	Core	1.20100765376356	5.03065184543009	5.03065184543009	5.03065184543009	0	704.117432477175	288.997406547328	26.538933408294	0.0212418300653595	0
Chr3	2778806	2781514	2709	LTR/Gypsy	0.09201594336153	2708	0.201624815361891	92.0593692022263	Core	1.15634438403866	5.03065184543009	5.03065184543009	5.03065184543009	1.23665381861825	203.232667757278	289.006239698544	36.0703077772402	0.0465631929046563	0.0123456790123457
Chr1	8352767	8352889	123	Unspecified	0.105288503937008	122	0.434426229508197	93.4426229508197	Core	2.9	5.65968108762095	5.45595786260369	5.27392591691811	0	432.950199121088	289.006776194797	911.931930273835	0	0.0217391304347826
Chr1	7682805	7682984	180	Unspecified	0.251142797927461	179	0.575418994413408	84.0909090909091	Core	-0.369318181818182	5.03065184543009	5.03065184543009	5.44610000351058	0	79.7291515085075	289.259704038003	929.863176093826	0.00384122919334187	0.00366748166259169
Chr4	3630183	3630981	799	LTR/Gypsy	0.341829156626506	563	0.513321492007105	75.6457564575646	Core	-0.471814671814672	6.59819563621239	7.98431665572569	6.33030298417604	0	29.8973511736597	289.278284360803	706.686948792175	0.00328048113723346	0.00374276964954066
Chr1	7516603	7517079	477	LTR/Gypsy	0.051792828685259	476	0.51890756302521	100	Core	-0.378662244333886	5.03065184543009	5.03065184543009	5.03065184543009	0	299.512219426475	289.673303327413	710.277917672578	0.00315656565656566	0.00499286733238231
Chr4	957264	961042	3779	Unspecified	0.0357778633605909	3778	0.543673901535204	96.8237162519852	Core	-0.641926824418373	6.62663913194985	8.08615663969588	7.3482083067201	249.941586479717	71.9940918526829	289.855390400406	634.210293182623	0.00299890948745911	0.00296817836681162
Chr3	2405849	2407008	1160	LTR/Copia	0.0991124955595027	1113	0.234501347708895	91.644204851752	Core	1.28269537480064	5.03065184543009	5.03065184543009	5.03065184543009	0	1044.73765781351	289.996293498144	56.2131969792683	0.00420168067226891	0
Chr5	586696	588136	1441	Unspecified	0.0264270158511371	1440	0.570138888888889	98.125	Core	-0.592662572823178	5.13283576313994	5.88017053567653	5.24744857759222	2.32635294440557	51.5029018238108	290.396498715742	717.43499189513	0.00279183388588379	0.00395843641761504
Chr5	2026301	2029269	2969	LTR/Gypsy	0.101634352783367	2968	0.268867924528302	91.5703602991162	Core	1.32201043793964	5.03065184543009	5.03065184543009	5.03065184543009	0	1064.64843031929	290.451239828353	108.494145734618	0.0171130952380952	0.029673590504451
Chr6	2214494	2216351	1858	DNA/Tc1-Mariner	0.000538213132400431	1857	0.510500807754443	100	Core	-0.400212089077413	5.03065184543009	5.03065184543009	5.03065184543009	144.294046853432	316.902375793573	290.954385648177	359.28104608438	0.00518935629899525	0.00582421461348394
Chr1	630759	631393	635	Unspecified	0.178260454545455	634	0.159305993690852	87.3015873015873	Core	1.19266055045872	5.03065184543009	5.03065184543009	5.03065184543009	0	624.712181887872	291.213898049723	8.77864167367836	0.0111111111111111	0
Chr1	5600651	5607526	6876	LTR/Gypsy	0.320032540983607	6724	0.259071980963712	74.6180608077447	Core	1.29728916203928	5.13159268805071	5.03065184543009	5.03065184543009	1277.39485155659	311.876079517275	291.967776986046	59.1280321682627	0.053382321158418	0.039237668161435
Chr4	877762	878238	477	LTR/Gypsy	0.051792828685259	476	0.51890756302521	100	Core	-0.378662244333886	5.03065184543009	5.03065184543009	5.03065184543009	0	263.733050357056	293.002881526578	618.35959891495	0.00348918353105373	0.00296076980014804
Chr3	158007	159864	1858	DNA/Tc1-Mariner	0.000538213132400431	1857	0.510500807754443	100	Core	-0.400212089077413	5.03065184543009	5.03065184543009	5.03065184543009	128.060966582421	327.19202695875	293.226727091573	344.738718028583	0.00291349170775437	0.00294934073560028
Chr8	753501	754140	640	Unspecified	0.105505858433735	639	0.273865414710485	93.2707355242567	Core	1.42296918767507	5.03065184543009	5.03065184543009	5.03065184543009	0	700.005226222823	293.338622692952	105.140254178805	0.0286885245901639	0
Chr3	1723517	1730345	6829	LTR/Gypsy	0.376826280299692	6828	0.200937316930287	70.8067151983361	Core	1.21212179802343	5.03065184543009	5.03065184543009	5.03065184543009	13.7298099950182	285.125645702691	293.514486555277	41.1629367327459	0.0367159612442631	0.0226415094339623
Chr2	3813919	3819015	5097	LTR/Copia	0.06114796375682	5096	0.162284144427002	94.7595682041217	Core	1.23068451685144	5.03065184543009	5.03065184543009	5.03065184543009	120.895471483401	375.07079630135	293.925767556704	19.2422459599227	0.0420560747663551	0.027027027027027
Chr7	3041149	3041315	167	Unspecified	0.341612369942197	166	0.469879518072289	75.7763975155279	Core	0.196172248803828	5.03065184543009	5.10919404715617	5.03065184543009	0	148.660714971344	293.944580411191	690.400264718105	0	0.00245700245700246
Chr4	1384056	1385498	1443	Unspecified	0.0257164738292011	1442	0.570735090152566	98.127600554785	Core	-0.592662572823178	5.13283576313994	5.88017053567653	5.24744857759222	0	48.6349122043654	294.017749490284	712.858426905254	0.0031624500665779	0.00376647834274953
Chr1	463343	468447	5105	LTR/Copia	0.0556470485629336	5011	0.188185990820196	95.2875399361022	Core	1.25714285714286	5.03065184543009	5.03065184543009	5.03065184543009	0.65601055986667	403.083159725357	294.360318811861	34.8462013995745	0.0303571428571429	0.0111111111111111
Chr4	3070431	3070931	501	Unspecified	0.107547709923664	500	0.292	93.8	Core	1.34343434343434	5.03065184543009	5.03065184543009	5.09975004453444	0	953.984280349673	294.405589598906	143.177559733598	0.024	0
Chr7	2036989	2037624	636	Unspecified	0.115537084592145	635	0.261417322834646	92.5984251968504	Core	1.36860465116279	5.03065184543009	5.03065184543009	5.03065184543009	0	329.688130222331	294.634993377799	68.8662482805571	0.00763358778625954	0.0434782608695652
Chr8	1023521	1025378	1858	DNA/Tc1-Mariner	0.000538213132400431	1857	0.510500807754443	100	Core	-0.400212089077413	5.03065184543009	5.03065184543009	5.03065184543009	156.919775953107	319.639989406327	295.025664067595	348.374300042532	0.00340136054421769	0.00437981779957954
Chr7	1945826	1955669	9844	LTR/Gypsy	0.101515169654614	9843	0.281316671746419	91.1011327686499	Core	1.34012974145407	5.03065184543009	5.03065184543009	5.03065184543009	3.0612270862626	681.335896287201	295.212601592691	105.581852627005	0.016654492330168	0.0104808877928483
Chr8	2753582	2754058	477	LTR/Gypsy	0.051792828685259	476	0.51890756302521	100	Core	-0.378662244333886	5.03065184543009	5.03065184543009	5.03065184543009	0	179.633560173268	295.222600326022	750.387729494088	0.00402067777139575	0.00181598062953995
Chr8	1405932	1406180	249	LTR/Gypsy	0.127153991596639	233	0.261802575107296	91.2663755458515	Core	1.37740384615385	5.13159268805071	5.03065184543009	5.03065184543009	0	686.642261284644	295.251058259348	249.079360269795	0.008	0
Chr3	1932399	1932680	282	LTR/Copia	0.202518881118881	281	0.451957295373665	83.5714285714286	Core	-0.262228260869565	6.32719908722656	5.78315614629556	5.91795839946015	0	0.625740254343665	295.599159765214	433.776871150039	0.0131578947368421	0.00795755968169761
Chr4	3037108	3038495	1388	LTR/Gypsy	0.134788330914369	1367	0.267739575713241	89.5755770662695	Core	1.34746098915631	5.03065184543009	5.03065184543009	5.03065184543009	16.9071812474728	1282.95713966341	295.92246837462	89.0635815195498	0.0198329853862213	0.00952380952380952
Chr6	3110834	3112691	1858	DNA/Tc1-Mariner	0.000538213132400431	1857	0.510500807754443	100	Core	-0.400212089077413	5.03065184543009	5.03065184543009	5.03065184543009	156.919775953107	282.729405868857	295.972473002343	386.654840071761	0.00264019431830183	0.00342524404863847
Chr1	633698	640273	6576	LTR/Gypsy	0.332878255584258	6575	0.24	73.5533384497314	Core	1.33795050891186	5.03065184543009	5.03065184543009	5.03065184543009	144.61889502706	930.672027817253	296.390198076019	56.9961198812405	0.0263399693721286	0.00261096605744125
Chr8	1095403	1095985	583	Unspecified	0.141629794520548	582	0.15979381443299	87.5862068965517	Core	1.18910256410256	5.03065184543009	5.03065184543009	5.03065184543009	0	722.54151778671	297.013148020812	25.2771780967815	0.0303030303030303	0
Chr5	2020815	2021291	477	LTR/Gypsy	0.051792828685259	476	0.51890756302521	100	Core	-0.378662244333886	5.03065184543009	5.03065184543009	5.03065184543009	0	215.0438718296	297.442319125466	639.25012590532	0.00609343263371699	0.00388500388500388
Chr3	1932130	1932392	263	Unspecified	0.320184714828897	262	0.465648854961832	74.8062015503876	Core	0.606112054329372	5.13283576313994	5.18367646598988	5.16928288619553	0	93.309619536611	298.939140997888	518.581319427612	0.00441501103752759	0.00522193211488251
Chr2	1138715	1138973	259	LTR/Copia	0.323692377358491	258	0.476744186046512	75.0972762645914	Core	-0.551192145862553	5.76189135548508	6.05099232105593	5.34801157379668	0	0.681740354926951	299.489297162307	676.46290122124	0	0.00246305418719212
Chr1	7044817	7044967	151	Unspecified	0.390191346153846	150	0.526666666666667	72.4137931034483	Core	0.0840336134453781	5.37424087113768	5.03065184543009	5.17381668090902	0	1.1758877262834	299.56272164753	905.723519179797	0.0072289156626506	0.00228310502283105
Chr1	9190202	9190696	495	LTR/Gypsy	0.0613167816091954	494	0.506072874493927	99.5934959349593	Core	-0.302941176470588	5.03065184543009	5.03065184543009	5.10018468709118	6.79030808722032	197.952231374114	299.770847669981	659.386390460744	0.00286861732644865	0.00397614314115308
Chr3	2460301	2460939	639	Unspecified	0.106704060150376	638	0.332288401253919	93.4169278996865	Core	1.32997936016512	5.1295646765902	5.03065184543009	5.10018468709118	0	1618.67314145603	299.868212747987	140.199376583723	0.0067476383265857	0
Chr6	1588521	1588765	245	Unspecified	0.163875180722892	244	0.39344262295082	87.551867219917	Core	-0.04	5.03065184543009	5.43413198475139	6.08036486436853	0	1.44203515404301	300.111157983782	681.134342982309	0.00409836065573771	0.00267379679144385
Chr1	664296	669385	5090	LTR/Copia	0.0621466198877306	4956	0.184221146085553	94.6306015341139	Core	1.19205052693968	5.03065184543009	5.03065184543009	5.03065184543009	5.26355642610002	481.888866627333	300.201552910886	27.8499301445911	0.0227272727272727	0.0102040816326531
Chr2	670870	671506	637	Unspecified	0.0967985692771084	636	0.226415094339623	94.6456692913386	Core	1.24489795918367	5.03065184543009	5.03065184543009	5.03065184543009	506.097167168446	564.250188405012	300.25920636833	81.2592152223839	0	0
Chr5	2043085	2043399	315	LTR/Gypsy	0.155078885448916	314	0.229299363057325	88.4615384615385	Core	1.16170212765957	5.03065184543009	5.03065184543009	5.03065184543009	0	663.884420646787	300.926733939502	93.8405142123327	0.130434782608696	0
Chr1	7212263	7214120	1858	DNA/Tc1-Mariner	0.000538213132400431	1857	0.510500807754443	100	Core	-0.400212089077413	5.03065184543009	5.03065184543009	5.03065184543009	180.36755856679	359.854589372982	301.274603036934	338.750700593844	0.00206096105868315	0.00290996234166381
Chr6	2167332	2169105	1774	LTR/Copia	0.119902816901408	1760	0.207386363636364	90	Core	1.28512666743551	5.03065184543009	5.03065184543009	5.03065184543009	0	496.156933952045	301.375054549198	92.2861429348848	0.0106382978723404	0
Chr1	644580	651804	7225	LTR/Copia	0.0976954640322805	7157	0.233337990778259	91.1949685534591	Core	1.28601733164831	5.03065184543009	5.03065184543009	5.03065184543009	35.2234893274222	959.576968301633	301.921809797896	49.0723482549642	0.0131944444444444	0.013262599469496
Chr8	1117344	1119201	1858	DNA/Tc1-Mariner	0.000538213132400431	1857	0.510500807754443	100	Core	-0.400212089077413	5.03065184543009	5.03065184543009	5.03065184543009	189.385936495129	323.038406304917	302.505454652107	341.316993780161	0.00308359981726816	0.00473243538405533
Chr6	2810962	2812819	1858	DNA/Tc1-Mariner	0.000538213132400431	1857	0.510500807754443	100	Core	-0.400212089077413	5.03065184543009	5.03065184543009	5.03065184543009	144.294046853432	262.810906824339	303.452263586855	373.609516374649	0.00362898921976732	0.00277008310249307
Chr3	638709	638909	201	Unspecified	0.193977260273973	200	0.57	89.8989898989899	Core	-0.6625	5.67251711852105	5.89032499829665	5.84863926345113	16.8222205376865	203.381304778635	303.770562670949	726.024546057279	0.00341296928327645	0.0048780487804878
Chr4	2890698	2891399	702	LTR/Gypsy	0.181292304347826	701	0.336661911554922	87.2146118721461	Core	1.91233651466949	5.03065184543009	5.03065184543009	5.03065184543009	9.56463396285605	1370.8717492161	304.511066492742	264.235322818193	0.0131406044678055	0.0106382978723404
Chr1	2920249	2920632	384	Unspecified	0.1161509	383	0.31331592689295	92.6892950391645	Core	1.65178571428571	5.03065184543009	5.03065184543009	5.03065184543009	0	596.255111468833	304.993430591113	160.014874277022	0.0109090909090909	0
Chr3	2374572	2375331	760	LTR/Gypsy	0.178786843467012	759	0.177865612648221	86.0186418109188	Core	1.18531976744186	5.03065184543009	5.03065184543009	5.10018468709118	8.83277542743962	364.052047711816	305.784811086524	29.847547137956	0.03125	0.0454545454545455
Chr2	907953	908137	185	Unspecified	0.244245882352941	184	0.5	85.792349726776	Core	0.858585858585859	5.1295646765902	5.03065184543009	5.10471848180467	0	0.95741678260233	306.323215925062	715.757400161855	0.00280112044817927	0.00580270793036751
Chr8	422038	423895	1858	DNA/Tc1-Mariner	0.000538213132400431	1857	0.510500807754443	100	Core	-0.400212089077413	5.03065184543009	5.11924851457382	5.03065184543009	176.760207395454	256.297274435374	306.576733071525	367.62149893991	0.00181643337963458	0.00278551532033426
Chr5	2041920	2043085	1166	LTR/Copia	0.143153349282297	1015	0.240394088669951	89.8507462686567	Core	1.29251012145749	5.03065184543009	5.03065184543009	5.03065184543009	0	422.514441841879	306.617728922308	63.4253628728242	0.0258064516129032	0
Chr1	4257898	4258863	966	Unspecified	0.116961001031992	965	0.270466321243523	89.8022892819979	Core	1.47517039922103	5.03065184543009	5.03065184543009	5.03065184543009	0	217.009835925492	306.794381266484	107.05311549007	0.0652631578947368	0.0256410256410256
Chr4	3867025	3867156	132	Unspecified	0.0754893333333333	131	0.511450381679389	95.4198473282443	Core	0.105263157894737	5.13283576313994	5.19040660395899	5.10018468709118	0	103.776614489611	306.847666089776	1047.25818766339	0	0
Chr8	180302	180552	251	DNA/Mite	0.235478666666667	250	0.436	83.9285714285714	Core	0.293939393939394	5.13159268805071	5.03065184543009	5.03065184543009	0	0	306.994241589739	1294.37369641537	0.0111731843575419	0.0141592920353982
Chr5	3620142	3621999	1858	DNA/Tc1-Mariner	0.000538213132400431	1857	0.510500807754443	100	Core	-0.400212089077413	5.43374218347563	5.33651743138835	5.30246363345899	160.527127124443	261.111698375044	307.050137538899	384.730120182023	0.00229458041958042	0.00194897236002835
Chr6	415717	415833	117	Unspecified	0.222744409448819	116	0.525862068965517	87.719298245614	Core	-0.725	5.03065184543009	5.03065184543009	5.03065184543009	0	0	307.141525183905	804.194460751024	0	0
Chr1	7147221	7149078	1858	DNA/Tc1-Mariner	0.000538213132400431	1857	0.510500807754443	100	Core	-0.400212089077413	5.03065184543009	5.03065184543009	5.03065184543009	146.0977224391	373.920259314371	307.239499325849	365.910636815698	0.00335382895472331	0.00396753832281335
Chr6	415838	415959	122	Unspecified	0.270981538461538	121	0.528925619834711	81.6666666666667	Core	0.133333333333333	5.03065184543009	5.03065184543009	5.03065184543009	0	0	307.523542006273	856.685694330087	0	0
Chr1	4275033	4275501	469	LTR/Gypsy	0.214071680497925	468	0.358974358974359	85.5875831485587	Core	0.893847194050034	5.03065184543009	5.03065184543009	5.03065184543009	0	640.425721554814	307.805760001384	224.383047930826	0.0466507177033493	0.0202702702702703
Chr3	336600	336830	231	Unspecified	0.274787772925764	230	0.578260869565217	79.0909090909091	Core	-0.875555555555556	5.03065184543009	5.03065184543009	5.10018468709118	0	182.85824375842	308.48275455152	773.040723652379	0.00218818380743982	0.00259965337954939
Chr2	499758	499908	151	LTR/Gypsy	0.216507483870968	150	0.226666666666667	84.9315068493151	Core	1.08095238095238	5.03065184543009	5.03065184543009	5.03065184543009	0	169.327832584809	308.997767998633	253.069806829649	0.121951219512195	0.32
Chr5	2142674	2144531	1858	DNA/Tc1-Mariner	0.000538213132400431	1857	0.510500807754443	100	Core	-0.400212089077413	5.03065184543009	5.03065184543009	5.03065184543009	164.134478295779	289.998242013064	309.038436301871	355.859321835957	0.00272201429057503	0.00288340241484952
Chr8	1304610	1306467	1858	DNA/Tc1-Mariner	0.000538213132400431	1857	0.510500807754443	100	Core	-0.400212089077413	5.03065184543009	5.03065184543009	5.03065184543009	165.938153881446	279.802991317292	309.133117195345	349.871304401217	0.00429231785163989	0.00370305060835831
Chr1	577829	579686	1858	DNA/Tc1-Mariner	0.000538213132400431	1857	0.510500807754443	100	Core	-0.400212089077413	5.03065184543009	5.03065184543009	5.03065184543009	140.686695682096	330.590443857341	309.22779808882	349.015873339112	0.00330539487663794	0.00405604719764012
Chr1	4274474	4275033	560	LTR/Gypsy	0.201799627659574	559	0.384615384615385	84.7145488029466	Core	1.52597840755736	5.03065184543009	5.03065184543009	5.03065184543009	5.99932237813551	172.695339012409	309.255625448193	178.542873148879	0.0688114387846291	0.0219435736677116
Chr8	1888923	1889050	128	Unspecified	0.328864732824427	127	0.393700787401575	79.3103448275862	Core	1.31666666666667	5.03065184543009	5.03065184543009	5.03065184543009	0	1248.69944089025	309.61553889067	529.226683756038	0	0.0112359550561798
Chr6	2183823	2184298	476	LTR/Gypsy	0.0947128099173554	475	0.326315789473684	92.6315789473684	Core	1.16347905282331	5.03065184543009	5.03065184543009	5.03065184543009	0	2078.46094103131	309.933310569312	153.241270771131	0.00636942675159236	0
Chr3	1800614	1800717	104	Unspecified	0.302590642201835	103	0.553398058252427	80.6122448979592	Core	-0.431818181818182	5.13159268805071	5.11924851457382	5.30060340585908	0	211.279356466626	310.107773451704	949.494932621128	0	0.00212314225053079
Chr8	1046976	1056391	9416	LTR/Copia	0.070412978868439	2921	0.169120164327285	93.9217032967033	Core	1.20309058943278	5.03065184543009	5.03065184543009	5.03065184543009	70.7644737107418	409.282249980458	310.276871239083	26.436036545175	0.0214067278287462	0
Chr2	1069539	1071396	1858	DNA/Tc1-Mariner	0.000538213132400431	1857	0.510500807754443	100	Core	-0.400212089077413	5.03065184543009	5.11924851457382	5.03065184543009	180.36755856679	297.550279565488	310.458649703993	379.383676043863	0.00277659120034173	0.00353544281421248
Chr1	545997	550063	4067	LTR/Copia	0.101130958333333	4066	0.154943433349729	90.8688161457051	Core	1.10854608002897	5.03065184543009	5.03065184543009	5.09975004453444	109.528588184735	472.08985033981	311.035935299263	82.7038747493292	0.00285714285714286	0.25
Chr8	1079149	1085273	6125	LTR/Copia	0.054486773418735	4984	0.190409309791332	95.421540943929	Core	1.25994856288882	5.03065184543009	5.03065184543009	5.03065184543009	780.182334272163	713.133368161162	311.247316960223	75.5852906981309	0.0229276895943563	0.0151515151515152
Chr5	2172691	2178531	5841	LTR/Gypsy	0.254460985650837	5840	0.300342465753425	78.9274012760821	Core	1.46499238964992	5.03065184543009	5.03065184543009	5.03065184543009	2.29328438910746	908.563275416358	311.338149101353	132.555921389486	0.0293901542983101	0.0283870967741935
Chr3	133024	134937	1914	Unspecified	0.240815987748851	1913	0.205436487192891	82.7120475418693	Core	1.27798201870928	5.03065184543009	5.03065184543009	5.03065184543009	3.50169653451843	420.515778039363	311.935117026088	327.791161212389	0.0255754475703325	0.0161290322580645
Chr5	3475341	3475503	163	LTR/Copia	0.251965838509317	162	0.462962962962963	82.6666666666667	Core	0.08	5.03065184543009	5.03065184543009	5.17425132346575	0	1.08824392059768	312.162317706456	1274.58165606462	0	0.00483091787439614
Chr3	215700	217557	1858	DNA/Tc1-Mariner	0.000538213132400431	1857	0.510500807754443	100	Core	-0.400212089077413	5.03065184543009	5.03065184543009	5.03065184543009	146.0977224391	277.25417864335	312.446948466965	356.073179601483	0.002925877763329	0.00308536167295166
Chr7	3065801	3066236	436	LTR/Copia	0.125538801843318	435	0.209195402298851	89.4859813084112	Core	1.45454545454545	5.03065184543009	5.03065184543009	5.03065184543009	15.4268289723485	746.851271313407	312.584824791103	65.8484813890002	0.08	0
Chr1	3728450	3728926	477	LTR/Gypsy	0.051792828685259	476	0.51890756302521	100	Core	-0.378662244333886	5.03065184543009	5.03065184543009	5.03065184543009	7.04762502526235	202.133862371562	312.980350721572	712.784780911422	0.00197628458498024	0.0012970168612192
Chr1	7143704	7144336	633	Unspecified	0.132714060606061	632	0.219936708860759	91.1392405063291	Core	1.33393829401089	5.03065184543009	5.03065184543009	5.03065184543009	3077.05339850995	946.563530231562	313.023736667468	47.8065308622729	0.0151515151515152	0
Chr1	663569	664217	649	Unspecified	0.1461646884273	648	0.192901234567901	90.2021772939347	Core	1.22321428571429	5.03065184543009	5.03065184543009	5.03065184543009	72.4369496414136	900.949909329807	313.159323411996	41.1029997816707	0.0136986301369863	0
Chr7	3095576	3098551	2976	LTR/Copia	0.0774442842605156	2934	0.158145875937287	93.2991452991453	Core	1.12371914817785	5.03065184543009	5.03065184543009	5.03065184543009	0	588.246335942845	313.757326938863	15.74867569348	0.018348623853211	0.0571428571428571
Chr1	462707	463343	637	Unspecified	0.137490554722639	636	0.243710691823899	91.0377358490566	Core	1.32199881726789	5.03065184543009	5.03065184543009	5.10471848180467	0	456.366656049824	313.819299559157	99.3862709258387	0.0179856115107914	0.03125
Chr1	2944193	2944317	125	LTR/Copia	0.0894885039370079	124	0.338709677419355	93.5483870967742	Core	0.982954545454545	5.03065184543009	5.03065184543009	5.03065184543009	0	2356.03924058243	314.309775801998	296.883261619241	0.0147058823529412	0
Chr1	7161163	7168492	7330	LTR/Copia	0.0844601723095526	6573	0.194736041381409	92.5875190258752	Core	1.20730264679642	5.03065184543009	5.03065184543009	5.03065184543009	918.220523044381	793.429761914638	314.333951077529	69.3310066055946	0.014792899408284	0.0252100840336134
Chr3	132388	132963	576	Unspecified	0.106545336787565	575	0.196521739130435	90.6086956521739	Core	1.31632653061224	5.03065184543009	5.03065184543009	5.03065184543009	17.4962816393708	561.029554870077	314.411824430505	38.7239036894662	0.0309278350515464	0
Chr8	739143	739681	539	Unspecified	0.242183714285714	538	0.195167286245353	83.206106870229	Core	1.1594982078853	5.03065184543009	5.03065184543009	5.03065184543009	0	323.007818443322	314.804626134647	57.6531862192332	0.0526315789473684	0
Chr8	1289390	1298779	9390	LTR/Copia	0.0639790785907859	1832	0.190502183406114	95.1072017592084	Core	1.32530864197531	5.03065184543009	5.03065184543009	5.03065184543009	882.191792547619	387.59103202158	314.954721394945	36.6140531635649	0.0303030303030303	0
Chr4	1380280	1384059	3780	Unspecified	0.0355126747560011	3779	0.543794654670548	96.8245567610479	Core	-0.641926824418373	6.62663913194985	8.10138245239409	7.3482083067201	276.457921848565	82.8269418719376	315.221514660291	618.388352419543	0.00294071312293231	0.00256739409499358
Chr1	1914650	1914780	131	Unspecified	0.085318045112782	130	0.523076923076923	93.8461538461538	Core	0	5.23174859430004	6.71261267546328	5.10471848180467	0	2.71639180180196	316.037482814863	799.993824282384	0.00291545189504373	0
Chr5	582920	586699	3780	Unspecified	0.0355126747560011	3779	0.543794654670548	96.8245567610479	Core	-0.641926824418373	6.62663913194985	8.10138245239409	7.3482083067201	259.622343274454	83.1979472106697	316.10526982903	655.054600294911	0.00219439092271462	0.00385887541345094
Chr6	423288	423923	636	Unspecified	0.107201510574018	635	0.330708661417323	93.3858267716535	Core	1.30392156862745	5.03065184543009	5.03065184543009	5.03065184543009	5.28016070504671	263.639963312744	316.254494302981	160.896598255483	0.0344370860927152	0.046875
Chr7	1980919	1982593	1675	LTR/Copia	0.0952010259433962	1674	0.272401433691756	92.1146953405018	Core	1.43142487465632	5.03065184543009	5.20046107137664	5.10471848180467	7873.81477904572	1260.06807368418	316.372951421021	94.1884310151587	0.00308641975308642	0
Chr5	2383850	2390674	6825	LTR/Gypsy	0.372816332726169	6669	0.254011096116359	71.4706794911573	Core	1.32131183213882	5.03065184543009	5.03065184543009	5.03065184543009	1.47191347808865	370.957678439045	316.634444456785	73.7062371741427	0.0407398150462384	0.0114068441064639
Chr1	622051	622570	520	Unspecified	0.282748754863813	519	0.183044315992293	80.1670146137787	Core	1.08097165991903	5.03065184543009	5.03065184543009	5.03065184543009	0	818.874138251899	316.852717301554	24.52015523194	0.0142857142857143	0
Chr1	6312152	6312407	256	DNA/Mite	0.187439622641509	255	0.458823529411765	86.2204724409449	Core	-0.310344827586207	5.03065184543009	5.03065184543009	5.03065184543009	0	91.7423900462917	316.8634021122	870.411209208996	0.00578034682080925	0.0040650406504065
Chr8	1048858	1053906	5049	LTR/Copia	0.0673808084074373	4909	0.180688531269098	94.2542787286064	Core	1.20037985407045	5.03065184543009	5.03065184543009	5.03065184543009	122.045259997608	488.754343462106	317.890677745453	25.4022516623539	0.0130293159609121	0.0175438596491228
Chr5	2148410	2152521	4112	LTR/Copia	0.0850936233316856	4010	0.258354114713217	92.6932668329177	Core	1.12715392142229	7.9652636372066	7.05480791550331	9.87535579619108	0	578.269254026304	317.891906126749	107.197375724307	0.0238663484486873	0.00171526586620926
Chr5	2351940	2355603	3664	LTR/Gypsy	0.0896838274737224	3663	0.214032214032214	92.0495988329686	Core	1.25485988023952	5.03065184543009	5.03065184543009	5.03065184543009	1309.06459371476	463.136642646934	318.488530591501	47.5827104387427	0.044205495818399	0.0483870967741935
Chr8	1131527	1136628	5102	LTR/Copia	0.055669668847908	5008	0.204672523961661	95.2856572113464	Core	1.24878364389234	5.03065184543009	5.03065184543009	5.03065184543009	1.96918934529389	512.051838721148	318.515139754172	43.9725112238473	0.0370898716119829	0.0159574468085106
Chr1	4250407	4250963	557	Unspecified	0.1458473183391	556	0.338129496402878	89.7297297297297	Core	0.756671899529042	5.13159268805071	5.03065184543009	5.12890085383927	0	123.434311793774	318.526314809072	275.340909791993	0.0276923076923077	0.0401146131805158
Chr1	642050	644579	2530	LTR/Copia	0.112189176470588	2526	0.22209026128266	91.7741935483871	Core	1.31693724689102	5.03065184543009	5.03065184543009	5.03065184543009	3.97265255577486	846.234486372675	318.576038204057	37.3682607003374	0.0175097276264591	0
Chr1	53070	53543	474	LTR/Gypsy	0.339610480961924	473	0.308668076109937	75.0528541226216	Core	1.55817672930828	5.03065184543009	5.03065184543009	5.03065184543009	0	955.844752927506	318.692677914491	151.367801498019	0.0220994475138122	0.0161290322580645
Chr8	1302580	1304608	2029	LTR/Gypsy	0.0955194615761136	2028	0.198224852071006	91.66255550074	Core	1.19118844118844	5.03065184543009	5.03065184543009	5.03065184543009	1047.06081714739	292.156179926416	318.772024513938	45.6252407431513	0.0553435114503817	0.0204081632653061
Chr1	704463	704633	171	Unspecified	0.252988387096774	170	0.570588235294118	87.037037037037	Core	-0.333333333333333	5.03065184543009	5.14536808661724	5.15087785571597	0	127.517718104117	319.221394407188	836.115529957765	0.00226757369614512	0.00204081632653061
Chr3	1723134	1738329	15196	LTR/Gypsy	0.107133753814852	982	0.294297352342159	90.5737704918033	Core	1.3767533356141	5.03065184543009	5.03065184543009	5.03065184543009	106.417096973859	401.613718699403	320.054870454111	85.3976255034136	0.0423484119345525	0.0375586854460094
Chr1	563014	570515	7502	LTR/Copia	0.0871048076204707	5308	0.229653353428787	92.5004710759374	Core	1.30088524166451	5.03065184543009	5.03065184543009	5.03065184543009	202.64271155971	796.305367193001	320.410242814155	48.7947002423067	0.0227576974564926	0.00819672131147541
Chr8	1290945	1298459	7515	LTR/Copia	0.0846546350510001	7503	0.215513794482207	92.5086643561717	Core	1.25527939078543	5.03065184543009	5.03065184543009	5.03065184543009	576.131385583722	402.559286002196	320.557520731378	36.3477930012133	0.027364185110664	0.0426229508196721
Chr4	2319097	2319733	637	Unspecified	0.101968250377074	636	0.275157232704403	94.0157480314961	Core	1.39325842696629	5.03065184543009	5.03065184543009	5.03065184543009	0	212.731978122379	321.56792423963	81.2592152223839	0.0359712230215827	0
Chr1	574282	581203	6922	LTR/Copia	0.054105	4868	0.198027937551356	95.4162384378212	Core	1.27998308880662	5.03065184543009	5.03065184543009	5.03065184543009	683.553428660471	561.650707715253	321.99822565149	120.68203857905	0.00959692898272553	0.0120481927710843
Chr3	2763619	2764255	637	Unspecified	0.110348235294118	636	0.30503144654088	93.0817610062893	Core	1.29012345679012	5.03065184543009	5.03065184543009	5.03065184543009	0	221.285403961281	322.398134026824	98.7612000395127	0.05	0.0531914893617021
Chr1	622570	630080	7511	LTR/Copia	0.0823274451972898	7483	0.204463450487772	92.7883328873428	Core	1.25872307024771	5.03065184543009	5.03065184543009	5.03065184543009	81.1382585476002	693.525865276321	322.530255573727	39.2744133071051	0.0160990712074303	0.0162162162162162
Chr6	2183626	2183823	198	LTR/Gypsy	0.0895333165829146	197	0.304568527918782	92.3857868020305	Core	1.65217391304348	5.03065184543009	5.03065184543009	5.03065184543009	0	2205.28743923689	322.76523359259	123.531228478769	0	0
Chr3	2972704	2972891	188	DNA/Mite	0.291805	187	0.438502673796791	79.5698924731183	Core	-0.657971014492754	5.37341608798077	6.04884671762384	5.16928288619553	0	308.967661069474	323.11229298355	599.647976352608	0	0
Chr1	7109300	7115709	6410	LTR/Gypsy	0.376145409836066	6409	0.204244031830239	70.8155860545828	Core	1.25473601508485	5.03065184543009	5.03065184543009	5.03065184543009	537.040465018041	690.411798608135	324.525913688446	39.5805068960801	0.0236220472440945	0.0124223602484472
Chr3	1749070	1754122	5053	LTR/Copia	0.0526664383012821	4959	0.190764266989312	95.5223880597015	Core	1.27840986049032	5.03065184543009	5.03065184543009	5.03065184543009	947.752781312503	406.781957939554	324.771022952011	29.7827528920321	0.0544871794871795	0.0508474576271187
Chr1	4429884	4430360	477	LTR/Gypsy	0.225057884231537	476	0.34453781512605	83.7894736842105	Core	1.27261998426436	5.03065184543009	5.03065184543009	5.10471848180467	0	995.915015334339	324.818850985273	160.439247286041	0.0303951367781155	0.0228310502283105
Chr1	7630445	7630611	167	Unspecified	0.274620655737705	166	0.518072289156627	83.9506172839506	Core	-0.25	6.68476227005986	6.18178815010917	5.60810417179207	0	270.774873697804	324.83006168628	779.406570622529	0.00177619893428064	0.0012987012987013
Chr7	3099051	3099572	522	LTR/Gypsy	0.283909513108614	521	0.211132437619962	78.515625	Core	1.15322580645161	5.03065184543009	5.03065184543009	5.03065184543009	7133.00971306841	607.497519236262	325.096315835203	82.4372334312291	0.0386740331491713	0.0535714285714286
Chr1	7242069	7248998	6930	LTR/Gypsy	0.380026022908511	6929	0.19945158031462	70.6547269524369	Core	1.21306432033935	5.03065184543009	5.03065184543009	5.03065184543009	0.966403547055316	650.628964575614	325.583321114527	36.6669757798641	0.022362664073894	0.0144404332129964
Chr6	1002175	1002388	214	LTR/Copia	0.0318181818181818	213	0.455399061032864	100	Core	-0.63395225464191	5.03065184543009	5.11924851457382	5.03065184543009	0	141.322846122522	325.759439375917	1132.71984789765	0.00613496932515337	0.00272479564032698
Chr2	640384	641022	639	Unspecified	0.103286	638	0.269592476489028	93.8775510204082	Core	1.16418875242405	5.03065184543009	5.03065184543009	5.03065184543009	0	1713.56561958727	325.799778523802	68.5419174409312	0.00467289719626168	0
Chr7	3060056	3060694	639	Unspecified	0.194800932330827	638	0.415360501567398	85.9621451104101	Core	0.501978518937253	5.49535134008363	5.45648234781686	5.25632328005168	10.5105867723693	703.029490154905	326.351513965841	155.777085093025	0.0188253012048193	0.00625978090766823
Chr8	1019316	1026295	6980	LTR/Copia	0.0680771868131868	4966	0.175795408779702	94.1982272360999	Core	1.23460472770988	5.03065184543009	5.11186440223292	5.03065184543009	42.2170716617894	451.300586534889	326.473831926408	115.071537106456	0.024390243902439	0.0625
Chr4	3388998	3389191	194	Unspecified	0.206169764150943	193	0.549222797927461	89.0052356020942	Core	-0.320855614973262	5.23377660576055	5.16639112300446	5.58950071763463	0	1.82507574183569	326.743763381665	1215.56753925215	0	0.00838574423480084
Chr1	7234744	7235381	638	Unspecified	0.103514682779456	637	0.271585557299843	94.1455696202532	Core	1.32558139534884	5.03065184543009	5.03065184543009	5.03065184543009	5.26355642610002	579.891990424774	327.417248227703	86.7482417949167	0.0648854961832061	0.0689655172413793
Chr2	2348548	2348732	185	Unspecified	0.252022335025381	184	0.380434782608696	83.8888888888889	Core	0.459595959595959	7.03545147791327	5.70131612411746	5.48354145000942	0	0.95741678260233	327.448954954377	652.857507420359	0	0
Chr8	1048182	1048821	640	Unspecified	0.127875172413793	639	0.250391236306729	91.5492957746479	Core	1.25136778115502	5.03065184543009	5.03065184543009	5.03065184543009	0	423.737961577801	327.768038501984	55.9918513378254	0.0431654676258993	0
Chr3	604572	604692	121	Unspecified	0.291058360655738	120	0.541666666666667	80.3571428571429	Core	-1.29761904761905	5.03065184543009	5.11186440223292	5.35315680208378	0	0	327.828217648944	850.542884607919	0	0
Chr3	1730691	1737172	6482	LTR/Gypsy	0.287167712569316	6481	0.281900941212776	76.5894605938132	Core	1.3886898350662	5.03065184543009	5.03065184543009	5.03065184543009	235.056783732226	536.383000985725	328.59459951411	88.7557250882523	0.0405458089668616	0.0177580466148724
Chr5	3482358	3482584	227	DNA/Tc1-Mariner	0.328495868544601	226	0.52212389380531	77.8350515463918	Core	-0.833333333333333	5.78295418674681	5.82723640754384	5.51527271587392	0	68.5255105201241	328.806123643533	714.456023070652	0.000983284169124877	0
Chr8	800091	800567	477	LTR/Gypsy	0.051792828685259	476	0.51890756302521	100	Core	-0.378662244333886	5.03065184543009	5.03065184543009	5.03065184543009	7.04762502526235	290.659641512392	328.888335450919	537.304354192315	0.000759301442672741	0.0056406124093473
Chr7	3102531	3107683	5153	LTR/Copia	0.0547140897359539	5003	0.202678392964221	95.3228063162103	Core	1.30991326680982	5.03065184543009	5.03065184543009	5.03065184543009	442.580179585855	488.852436792779	329.10997695144	39.9154662471794	0.0463917525773196	0.0393700787401575
Chr8	1311883	1312522	640	Unspecified	0.124877027027027	639	0.256651017214397	91.7057902973396	Core	1.3026113671275	5.03065184543009	5.03065184543009	5.03065184543009	0	143.900642817089	329.145215134345	85.8541720513322	0.0552486187845304	0
Chr1	617439	622306	4868	LTR/Copia	0.066072885335998	3970	0.192695214105793	94.4780635400908	Core	1.23121630506246	5.03065184543009	5.03065184543009	5.03065184543009	315.086482582372	790.089016090763	329.642991184694	42.0085915743465	0.0273972602739726	0.0204081632653061
Chr4	2330021	2330331	311	Unspecified	0.248940911949686	310	0.248387096774194	80.7817589576547	Core	1.38636363636364	5.03065184543009	5.11186440223292	5.09975004453444	0	522.219730712442	329.844945656289	68.0801316482282	0.00862068965517241	0.0294117647058824
Chr4	775655	775811	157	Unspecified	0.112521707317073	156	0.493589743589744	93.5897435897436	Core	-0.315789473684211	5.30376646722054	5.11186440223292	5.22419553571217	0	0	329.914657046361	798.961574186535	0.00260416666666667	0.00251889168765743
Chr2	499907	500218	312	Unspecified	0.159260923076923	311	0.305466237942122	89.0322580645161	Core	0.952503209242619	5.03065184543009	5.03065184543009	5.03065184543009	4330.31089253821	166.729500028344	329.914657046361	147.244520883736	0.0521327014218009	0.0784313725490196
Chr5	1223360	1223787	428	LTR/Gypsy	0.54991106888361	427	0.585480093676815	61.5571776155718	Core	-0.479876160990712	5.13283576313994	5.26672321719341	5.27206568931819	7.85826734037469	28.3786425209381	330.417648755231	674.577674365091	0.00175054704595186	0.00111049416990561
Chr5	2137352	2144650	7299	LTR/Copia	0.0685692349200231	5156	0.231380915438324	94.0605590062112	Core	1.30519159508347	5.03065184543009	5.03065184543009	5.12890085383927	1146.91718754269	325.875439899496	330.552135913241	147.791102483742	0.0500481231953802	0.0344827586206897
Chr2	4159068	4159281	214	Unspecified	0.193087	213	0.605633802816901	90.3381642512077	Core	-0.222222222222222	5.1295646765902	5.23396475576097	5.10471848180467	0	214.876842057636	330.732865931275	919.28172779793	0.00303951367781155	0.00348432055749129
Chr2	4093594	4093851	258	DNA/Mite	0.146127384615385	257	0.307392996108949	87.5486381322957	Core	0.422413793103448	5.03065184543009	5.03065184543009	5.29731840517189	0	0.684403403188384	330.862382247821	652.747364828004	0.0194552529182879	0
Chr8	1108730	1109800	1071	LTR/Copia	0.0914906273062731	1070	0.189719626168224	92.6029962546816	Core	1.33464384828862	5.03065184543009	5.03065184543009	5.03065184543009	0	783.433822650666	331.071716477688	63.4923500390196	0.0379746835443038	0
Chr5	2375025	2381417	6393	LTR/Gypsy	0.313439574001566	6392	0.253911138923655	74.7316919191919	Core	1.27299578059072	5.03065184543009	5.03065184543009	5.03065184543009	1931.25988067088	440.937842316036	331.245824310935	70.4283045743249	0.0426701570680628	0.0221870047543582
Chr1	1857720	1858571	852	LTR/Gypsy	0.46757443236715	851	0.531139835487662	65.8838071693449	Core	0.165007466401195	6.16808101293451	6.77857011372611	5.312094263902	0	25.7657751788568	331.401840562054	513.19422833637	0.00216497077289457	0.0040650406504065
Chr1	581921	587922	6002	LTR/Copia	0.0810963020572002	5944	0.19936069986541	92.8150765606596	Core	1.2148546571437	5.03065184543009	5.03065184543009	5.03065184543009	1903.68097974045	791.849262261735	331.539666239144	31.2905276770758	0.0155945419103314	0.0446428571428571
Chr6	1308341	1308554	214	Unspecified	0.169925641025641	213	0.563380281690141	92.8571428571429	Core	-0.315789473684211	5.23050551921081	5.19040660395899	6.14864373180912	0	206.612348132342	331.561770357168	692.737758218399	0.0033003300330033	0.00134228187919463
Chr5	3348512	3348638	127	Unspecified	0.0784553846153846	126	0.515873015873016	95.2380952380952	Core	0.488095238095238	5.03065184543009	5.03065184543009	5.03065184543009	0	1.40165816972981	331.773969890196	1038.34275352935	0.00344827586206897	0.00334448160535117
Chr1	7201199	7208694	7496	LTR/Copia	0.0870260817626759	7485	0.201736806947228	92.4280936454849	Core	1.22236919140447	5.03065184543009	5.03065184543009	5.03065184543009	956.399581006963	743.356710477704	331.852008576215	36.0691925178005	0.0164948453608247	0.0155440414507772
Chr8	1097694	1098332	639	Unspecified	0.150234298642534	638	0.188087774294671	90.0158478605388	Core	1.16859716859717	5.03065184543009	5.03065184543009	5.03065184543009	0	516.82019248868	331.868868386227	41.1251504645587	0	0
Chr6	3272844	3273007	164	Unspecified	0.267196741573034	163	0.52760736196319	83.2298136645963	Core	-0.457142857142857	5.41629755497831	5.11186440223292	5.87784422466853	0	91.9297410702422	331.930172324231	681.134342982309	0.00220264317180617	0.00404858299595142
Chr2	3635004	3640178	5175	LTR/Copia	0.0736078076202374	4766	0.173730591691146	93.6621196222455	Core	1.19533020308715	5.03065184543009	5.03065184543009	5.03065184543009	879.45450307993	448.19598298943	332.024533933812	19.8728558514615	0.0313390313390313	0.0444444444444444
Chr1	481433	483682	2250	LTR/Copia	0.101619967845659	2160	0.202777777777778	91.1533117183881	Core	1.22582582582583	5.03065184543009	5.11924851457382	5.03065184543009	1.4891556436831	349.868968189342	332.147313163359	50.6743966541313	0.0216450216450216	0.0625
Chr6	1224196	1224398	203	Unspecified	0.360908163265306	202	0.485148514851485	75	Core	0.1	5.47529361769265	5.10919404715617	5.38741343639704	0	229.251305123719	332.221594775789	610.190467464985	0.00139275766016713	0
Chr2	3649716	3652110	2395	LTR/Copia	0.0863713341645885	2394	0.132414369256475	92.4236082042696	Core	1.06669334400427	5.03065184543009	5.03065184543009	5.03065184543009	0	119.782321650542	332.803221866737	10.4496284193367	0.025	0.0909090909090909
Chr1	4451867	4457851	5985	LTR/Gypsy	0.227251862368465	5984	0.33673128342246	80.9066397034041	Core	1.5407138473539	5.03065184543009	5.03065184543009	5.03065184543009	387.189427679046	698.808476188001	332.892894161945	144.026967712815	0.0357865587389498	0.0210191082802548
Chr1	1831768	1831913	146	Unspecified	0.25472	145	0.579310344827586	81.6176470588235	Core	-0.605769230769231	5.43253938454559	5.19040660395899	7.67687903160435	0	180.074139861121	333.150503840129	865.506139059354	0.00699300699300699	0
Chr1	7211136	7218854	7719	LTR/Copia	0.108637413651316	4829	0.217229240008283	90.5453037528509	Core	1.2782322701896	5.23050551921081	5.03065184543009	5.10018468709118	850.678569444894	674.560481418336	333.30658356103	172.048392234413	0.0122549019607843	0
Chr8	1085273	1085906	634	Unspecified	0.112219894099849	633	0.252764612954186	93.0489731437599	Core	1.17845716317099	5.03065184543009	5.03065184543009	5.03065184543009	1742.67025446657	937.857909057743	333.93831279343	74.1084834057111	0.0228758169934641	0.0833333333333333
Chr6	3439030	3439663	634	Unspecified	0.113560951661631	633	0.244865718799368	93.0489731437599	Core	1.3170653907496	5.03065184543009	5.11924851457382	5.03065184543009	5.29687007436648	596.591847559049	333.93831279343	62.1757615014017	0.0282485875706215	0
Chr8	1027019	1033847	6829	LTR/Gypsy	0.369124337597412	6828	0.207674282366725	71.3031835763166	Core	1.19486884942605	5.03065184543009	5.03065184543009	5.03065184543009	1821.16122576777	533.551950869393	334.415523048861	44.0699237901432	0.0277237354085603	0.0123076923076923
Chr2	263126	263334	209	LTR/Copia	0.370769326923077	208	0.4375	72.7272727272727	Core	-0.731060606060606	5.03065184543009	5.14160453308651	5.03065184543009	0	0	334.476951140018	544.566587633025	0	0.0153508771929825
Chr5	2360510	2367380	6871	LTR/Gypsy	0.238533206395349	6870	0.329403202328967	80.3745207903273	Core	1.47943471360674	5.03065184543009	5.03065184543009	5.03065184543009	0.974704290871922	644.943347314352	334.494129878088	166.591992568277	0.0400611620795107	0.0293532338308458
Chr1	4430360	4434836	4477	LTR/Gypsy	0.251938680974737	4476	0.306076854334227	79.3830800635065	Core	1.43920618180343	5.03065184543009	5.03065184543009	5.03065184543009	1.49614386011156	690.179614971986	335.041131415486	112.645456151425	0.0389036251105217	0.0206794682422452
Chr5	2186553	2192535	5983	LTR/Gypsy	0.356390876097232	5982	0.21815446339017	72.2612720726899	Core	1.25773195876289	5.03065184543009	5.03065184543009	5.03065184543009	522.208864833747	430.855800877488	335.266547670823	43.600810637149	0.0231182795698925	0.0130718954248366
Chr3	1738329	1747690	9362	LTR/Copia	0.0849709703969202	7490	0.211615487316422	92.5040085515767	Core	1.24035598801215	5.03065184543009	5.03065184543009	5.03065184543009	62.2314325147365	419.598952092193	335.365874899759	94.5229389496963	0.0293421675343114	0.0249221183800623
Chr8	2914448	2919583	5136	LTR/Copia	0.0678318236959159	4908	0.165647921760391	94.230377166157	Core	1.20932924203273	5.03065184543009	5.03065184543009	5.03065184543009	573.151468381898	408.020672898559	335.539349133229	19.8691942528197	0.0288461538461538	0.037037037037037
Chr1	679124	680123	1000	Unspecified	0.226206829745597	999	0.202202202202202	83.0439223697651	Core	1.16655435759209	5.03065184543009	5.03065184543009	5.03065184543009	0	359.71913699604	335.784365648991	47.3281378008281	0.0495049504950495	0
Chr3	260206	265190	4985	LTR/Copia	0.0866021477079796	4698	0.188165176670924	92.4508126603935	Core	1.22707805015497	5.03065184543009	5.03065184543009	5.03065184543009	0.671808526389648	520.031214386512	336.220802097166	29.5519415523014	0.0201550387596899	0.0612244897959184
Chr5	3970241	3970397	157	Unspecified	0.337195	156	0.551282051282051	77.7777777777778	Core	0.141176470588235	5.33482935231552	5.6002851211466	5.22419553571217	0	1.13036949171759	336.717021109173	888.588673854897	0	0.0103270223752151
Chr1	1751519	1751643	125	Unspecified	0.0809256692913386	124	0.475806451612903	94.3548387096774	Core	1.125	5.27247524536016	5.87756583550905	5.2023543974499	0	0	337.168668587598	1232.71093411467	0.00334448160535117	0
Chr7	596440	596808	369	DNA/Mite	0.250103272727273	276	0.438405797101449	81.9230769230769	Core	-0.274247491638796	5.03065184543009	5.24952708066976	5.03065184543009	0	1.43221202629068	337.569633498517	626.203507959291	0	0.00335570469798658
Chr6	2607249	2607453	205	LTR/Copia	0.369120196078431	204	0.450980392156863	72.4489795918367	Core	-0.770334928229665	5.03065184543009	5.03065184543009	5.03065184543009	0	2.58927001797379	337.605014447422	606.134009720586	0.00220264317180617	0.00284090909090909
Chr7	2001848	2002167	320	LTR/Gypsy	0.101797049689441	319	0.304075235109718	91.2225705329154	Core	1.57142857142857	5.03065184543009	5.03065184543009	5.03065184543009	0	975.761249446342	337.640402813716	175.992835871701	0.0104166666666667	0
Chr1	7208762	7210847	2086	LTR/Copia	0.141509723479135	1961	0.235084140744518	88.6947584789311	Core	1.35148215366001	5.03065184543009	5.03065184543009	5.03065184543009	1395.91334923353	910.253898972209	337.71093658764	82.2790045762747	0.0186567164179104	0
Chr1	7155555	7161132	5578	LTR/Copia	0.0881419691535151	5555	0.177497749774978	92.0057616132517	Core	1.18014443014443	5.03065184543009	5.03065184543009	5.03065184543009	1771.67004815923	862.022288117997	338.093109104663	28.6870095346597	0.0111524163568773	0
Chr1	7190591	7193659	3069	LTR/Copia	0.171657872062663	3041	0.228872081552121	86.403215003349	Core	1.21468856676396	5.03065184543009	5.03065184543009	5.03065184543009	2894.65055243658	1134.76271126153	338.105439727797	179.371091543659	0.0142857142857143	0
Chr5	3815150	3815327	178	Unspecified	0.248156813186813	177	0.559322033898305	84.3373493975904	Core	-0.5375	5.03065184543009	5.03065184543009	5.03065184543009	0	202.08565941417	338.475586818593	640.484566136569	0.00572519083969466	0.00525624178712221
Chr8	764459	766316	1858	DNA/Tc1-Mariner	0.000538213132400431	1857	0.510500807754443	100	Core	-0.400212089077413	5.03065184543009	5.03065184543009	5.03065184543009	167.741829467114	316.147172038331	338.673555959495	341.530851545687	0.00285225328009127	0.00401899890390939
Chr6	1231584	1231792	209	Unspecified	0.26662224137931	208	0.524038461538462	84.4660194174757	Core	0.321969696969697	5.27583328960119	5.58488560778301	5.25693637281563	0	0	338.721582499663	876.292008972861	0	0.00110741971207087
Chr1	4419646	4420122	477	LTR/Gypsy	0.222516966067864	476	0.352941176470588	84	Core	1.14417822614544	5.03065184543009	5.03065184543009	5.03065184543009	0	571.360132871441	339.616976314898	177.151668878337	0.0300157977883096	0.00581395348837209
Chr1	4461626	4462505	880	Unspecified	0.167512430939227	879	0.249146757679181	87.3142857142857	Core	0.943417366946779	5.03065184543009	5.03065184543009	5.13529487615267	0	369.372048999129	339.646892798337	132.005289000652	0.018018018018018	0.00546448087431694
Chr1	7153080	7154199	1120	Unspecified	0.237854289405685	1119	0.204647006255585	82.9535095715588	Core	1.25942768411713	5.03065184543009	5.03065184543009	5.03065184543009	2.99429506887264	1040.43029839403	339.666943151319	37.6328455801476	0.0431654676258993	0.111111111111111
Chr5	1547745	1548275	531	LTR/Gypsy	0.0676998220640569	530	0.488679245283019	98.8679245283019	Core	-0.0999194198227236	5.03065184543009	5.03065184543009	5.03065184543009	6.32820772589719	238.798568141586	339.828877636962	564.241681736117	0.00801373783629079	0.00810263335584065
Chr1	4439168	4445993	6826	LTR/Gypsy	0.290801644015783	6825	0.271794871794872	76.2929129217622	Core	1.30987520168593	5.03065184543009	5.03065184543009	5.03065184543009	711.81116032187	786.378707914798	339.841582972432	75.149568663482	0.0425151839942837	0.0192307692307692
Chr3	1932680	1933320	641	Unspecified	0.0986136448598131	640	0.3171875	91.5094339622642	Core	1.53675754625122	5.03065184543009	5.03065184543009	5.03065184543009	5.23884489358312	227.577519733127	339.905296597142	267.719132275649	0.0430622009569378	0.0517241379310345
Chr7	3079850	3080439	590	Unspecified	0.102766632825719	589	0.232597623089983	90.6621392190153	Core	1.47727272727273	5.03065184543009	5.03065184543009	5.03065184543009	0	740.16132942365	340.098922063303	45.2272803720084	0.0224719101123596	0
Chr1	592333	605805	13473	LTR/Copia	0.0890713681102362	4036	0.19400396432111	92.3286991062562	Core	1.17021257982679	5.03065184543009	5.03065184543009	5.03065184543009	727.376532050173	643.15934686678	340.262959359964	61.3456659999298	0.0255255255255255	0.0434782608695652
Chr7	1991252	1991868	617	Unspecified	0.232519537480064	616	0.256493506493506	85.8143607705779	Core	1.25	5.03065184543009	5.03065184543009	5.03065184543009	5.44328762113759	817.918822214286	340.311766345618	137.469858097605	0.0144927536231884	0
Chr4	2335529	2336424	896	Unspecified	0.257998944444444	895	0.260335195530726	82.8709288299156	Core	1.28533171028606	5.03065184543009	5.03065184543009	5.03065184543009	0	460.556026127664	340.841049433607	91.4603161524697	0.0445859872611465	0
Chr7	3098551	3099051	501	Unspecified	0.126057142857143	500	0.21	92.2	Core	1.23529411764706	5.03065184543009	5.03065184543009	5.03065184543009	0	900.614530400041	340.89068269347	59.6573165556657	0.024390243902439	0
Chr1	7248995	7254186	5192	LTR/Copia	0.0626464128563229	5191	0.178385667501445	94.6414803392444	Core	1.23954957919453	5.03065184543009	5.03065184543009	5.03065184543009	0	372.121339232459	341.026932572219	37.0152767251333	0.0256410256410256	0.0298507462686567
Chr4	908673	908826	154	LTR/Copia	0.128268674698795	153	0.581699346405229	94.7712418300653	Core	0.0615384615384615	5.44756358762432	5.6723164501812	5.39839042859983	0	10.374114743066	341.050544706205	1749.58163544348	0.00598802395209581	0.00569259962049336
Chr1	653407	662141	8735	LTR/Copia	0.0861350313793564	7505	0.208127914723518	92.4794833849052	Core	1.22715157553867	5.03065184543009	5.03065184543009	5.03065184543009	514.045683094754	850.075264937905	341.575444573554	67.0850725887936	0.0163078930202218	0.0106951871657754
Chr1	68221	75736	7516	LTR/Copia	0.0911065209905973	7505	0.231312458361093	91.9488136496934	Core	1.3061617515639	5.03065184543009	5.03065184543009	5.03065184543009	1090.62794508585	1046.11378970519	341.679831834796	61.1174414199231	0.0255474452554745	0.0344827586206897
Chr8	1075116	1078420	3305	LTR/Copia	0.0947494787297783	3304	0.214891041162228	91.9745608721987	Core	1.28048142333857	5.03065184543009	5.03065184543009	5.03065184543009	112.499554785637	515.808509024095	341.932235539002	41.8190022586515	0.0160692212608158	0
Chr1	4437516	4448657	11142	LTR/Gypsy	0.0856482054309327	4247	0.280668707322816	92.138290314942	Core	1.51415428167021	5.03065184543009	5.03065184543009	5.03065184543009	436.633267667006	809.020361229036	342.590217250179	91.6407785426749	0.0315789473684211	0.0320284697508897
Chr8	735874	737281	1408	Unspecified	0.241082232267038	1407	0.1727078891258	81.9636363636364	Core	1.16894586894587	5.03065184543009	5.03065184543009	5.03065184543009	28.5714528051176	513.160414557909	342.706584914124	36.1349656049642	0.0405405405405405	0
Chr1	76508	88067	11560	LTR/Copia	0.0989251337507114	1729	0.240023134759977	92.5494761350407	Core	1.32384028185555	5.03065184543009	5.03065184543009	5.03065184543009	27.5154939665135	997.277726144065	342.728385232512	153.197800413287	0.0238095238095238	0.0222222222222222
Chr8	1886140	1888787	2648	Unspecified	0.11802489626556	2647	0.347941065357008	89.3939393939394	Core	1.4462700334371	5.03065184543009	5.10919404715617	5.03065184543009	2.53032644520001	487.150375789031	342.755426043489	242.862245181697	0.0492694529391777	0.0228136882129278
Chr5	2041195	2041827	633	Unspecified	0.133535683890578	632	0.280063291139241	90.8227848101266	Core	1.43647316538883	5.03065184543009	5.03065184543009	5.03065184543009	0	951.561518950884	342.82225964204	120.145360456502	0.0286624203821656	0
Chr1	3744300	3751806	7507	LTR/Copia	0.0838789871403951	7495	0.189859906604403	92.6682692307692	Core	1.17001164865934	5.03065184543009	5.03065184543009	5.03065184543009	1288.19880208593	504.517566722701	343.166653213586	23.9579967762977	0.0294365012615643	0.0238095238095238
Chr1	3094078	3094336	259	LTR/Copia	0.215485555555556	258	0.372093023255814	83.6653386454183	Core	0.1875	5.03065184543009	5.03065184543009	5.03065184543009	0	614.929800144109	343.250290354973	134.365918735726	0.0204081632653061	0.0217391304347826
Chr4	2336260	2339245	2986	LTR/Copia	0.0458807409948542	2892	0.209889349930844	96.2988585264614	Core	1.33791666666667	5.03065184543009	5.11186440223292	5.03065184543009	1284.52649484402	380.300769325569	343.269767589921	46.6886476202336	0.0887573964497041	0.0760869565217391
Chr4	3265095	3265277	183	Unspecified	0.185149	182	0.543956043956044	91.1111111111111	Core	-0.00526315789473686	5.91150618855731	5.40062830036707	5.48216903851909	18.4951485469592	567.245640512202	343.688504720507	833.312734091	0.00239808153477218	0.00290275761973875
Chr1	6503785	6503922	138	DNA/Mite	0.300073214285714	137	0.262773722627737	77.037037037037	Core	1.02941176470588	5.03065184543009	5.03065184543009	5.03065184543009	0	0	343.702782242305	221.808242456575	0.0227272727272727	0.0121951219512195
Chr2	669683	670458	776	Unspecified	0.286855215686275	775	0.20258064516129	79.9157303370787	Core	1.27364257461345	5.03065184543009	5.03065184543009	5.03065184543009	0	261.226344939955	343.736170245476	19.4870290530324	0.0102040816326531	0
Chr2	3913765	3914209	445	Unspecified	0.15482535637149	444	0.191441441441441	89.3665158371041	Core	1.15384615384615	5.03065184543009	5.03065184543009	5.03065184543009	0	136.052598867679	343.918620986055	17.0236574345904	0.0123456790123457	0
Chr1	7128003	7129306	1304	Unspecified	0.255975082912761	1303	0.19800460475825	84.0222575516693	Core	1.15329768270945	5.03065184543009	5.03065184543009	5.03065184543009	0	770.266067927557	344.032261827514	31.7048243724816	0.0253521126760563	0
Chr2	2668284	2668925	642	Unspecified	0.106079041916168	641	0.252730109204368	93.59375	Core	1.33406593406593	5.03065184543009	5.03065184543009	5.03065184543009	0	357.806099186887	344.041962619518	130.859566725614	0.03515625	0.027027027027027
Chr5	2178544	2179106	563	LTR/Gypsy	0.192485633802817	562	0.346975088967972	85.8455882352941	Core	1.66936208445642	5.03065184543009	5.03065184543009	5.03065184543009	0	885.093416447033	344.564192724116	220.746958999845	0.0305403288958496	0.0324909747292419
Chr1	4435581	4437265	1685	Unspecified	0.0908487603305785	1684	0.25	91.9239904988123	Core	1.42857142857143	5.03065184543009	5.03065184543009	5.03065184543009	2872.23173192362	967.543897019375	344.66860611585	72.8747973621283	0.0393258426966292	0.0238095238095238
Chr3	249939	257443	7505	LTR/Copia	0.0889302765531062	7436	0.174018289402905	92.1711057304278	Core	1.18970189701897	5.03065184543009	5.03065184543009	5.03065184543009	54.8790473278626	608.426689529359	344.850755507349	21.9012242178129	0.0180851063829787	0
Chr1	77329	87099	9771	LTR/Gypsy	0.109092871125612	9770	0.317400204708291	90.4355866036573	Core	1.42619255211966	5.03065184543009	5.03065184543009	5.03065184543009	32.211736859245	1020.64647255328	345.267500125377	168.69811579653	0.0278703703703704	0.0249728555917481
Chr1	7175443	7180491	5049	LTR/Copia	0.0885617886822319	5038	0.202461294164351	92.246362367949	Core	1.25325781362228	5.03065184543009	5.03065184543009	5.03065184543009	7.95947347810489	905.405357755181	345.362281769676	47.1868451932271	0.0218228498074454	0.0531914893617021
Chr4	284974	285093	120	LTR/Copia	0.331310151515152	119	0.53781512605042	78.1512605042017	Core	-0.866666666666667	5.27380527814068	5.31250695748704	5.16928288619553	0	151.450353085213	345.498604094215	1005.75494773128	0.00757575757575758	0
Chr8	663861	664044	184	Unspecified	0.309764021164021	183	0.53551912568306	80	Core	-0.511764705882353	5.27247524536016	5.60997521639922	5.3246190855429	0	0.96267731437487	345.662254437192	1184.21740087718	0	0.00432900432900433
Chr6	3480568	3481514	947	Unspecified	0.276231442105263	946	0.306553911205074	79.6892341842397	Core	1.48648648648649	5.03065184543009	5.03065184543009	5.03065184543009	3.54245702328002	104.753553690125	345.876818220207	133.146713294178	0.045016077170418	0.0271084337349398
Chr8	2760042	2760541	500	LTR/Gypsy	0.0604933459357278	499	0.507014028056112	99.7991967871486	Core	-0.280504908835905	5.03065184543009	5.03065184543009	5.03065184543009	0	230.443298487205	346.162472413258	679.067973735158	0.00402010050251256	0.0042501517911354
Chr7	3078106	3079788	1683	Unspecified	0.262256957026713	1682	0.247324613555291	80.958230958231	Core	1.36981566820276	5.03065184543009	5.03065184543009	5.03065184543009	0	507.381913313855	346.54220846462	95.1569096759444	0.0338345864661654	0.0225563909774436
Chr3	148165	149892	1728	Unspecified	0.195113921457029	1727	0.19976838448176	85.8164481525626	Core	1.24679897567222	5.03065184543009	5.03065184543009	5.03065184543009	0	300.572844768972	346.670306416607	43.0035008092609	0.0232067510548523	0.0140845070422535
Chr1	480965	481433	469	LTR/Gypsy	0.320130689655172	468	0.282051282051282	77.3420479302832	Core	1.31982942430704	5.03065184543009	5.03065184543009	5.03065184543009	0	521.494875782772	346.939988656817	96.0427440006943	0.0323383084577114	0.0380952380952381
Chr4	1206925	1208998	2074	LINE/I	0.302471010248902	2073	0.56825856246985	77.8236204228984	Core	-0.533250048049202	5.03065184543009	5.1977907162999	5.66190704971427	3.23129525772164	73.7358786199563	347.045320984465	580.821177056579	0.00326236263736264	0.00226946966077401
Chr8	729000	735709	6710	LTR/Gypsy	0.367008194682009	6515	0.214888718342287	71.7274167987322	Core	1.26714173493435	5.03065184543009	5.03065184543009	5.03065184543009	340.351539495191	401.216292956537	347.08062084003	43.0174193974329	0.0446387482742752	0.014218009478673
Chr8	793081	793848	768	Unspecified	0.282498331108144	767	0.241199478487614	80.431654676259	Core	1.43617021276596	5.03065184543009	5.03065184543009	5.03065184543009	0	392.729614462481	347.096694558367	40.417442558392	0.0294117647058824	0
Chr1	7168492	7175433	6942	LTR/Copia	0.0884953272101033	6941	0.218700475435816	92.0271049596309	Core	1.24079762453284	5.03065184543009	5.03065184543009	5.03065184543009	255.171754787147	918.626365669283	347.125585620749	64.11344875618	0.0148001973359645	0.0263157894736842
Chr1	4879515	4887037	7523	LTR/Copia	0.0830956532097948	7511	0.215949940087871	92.6725286437517	Core	1.15526286164584	5.03065184543009	5.03065184543009	5.03065184543009	46.290742753352	242.671738367163	347.132962074739	69.1351172437585	0.0421189752496743	0.0285171102661597
Chr1	7193672	7198068	4397	LTR/Copia	0.125205605978261	3671	0.208390084445655	89.1417603509734	Core	1.24814570022766	5.03065184543009	5.03065184543009	5.03065184543009	128.725392241851	846.057774066433	347.137252292991	60.6894763624672	0.0186440677966102	0
Chr8	1312656	1313024	369	Unspecified	0.175840626631854	368	0.266304347826087	87.431693989071	Core	1.13166666666667	5.03065184543009	5.03065184543009	5.21997605482032	0	291.216445345771	347.146077002021	93.0112291614836	0.0569105691056911	0
Chr2	3620789	3627343	6555	LTR/Copia	0.0799396700623385	6554	0.166768385718645	92.7208911948726	Core	1.15990338164251	5.03065184543009	5.03065184543009	5.09975004453444	52.61789323378	379.21024380585	347.164855774953	18.6557857389966	0.0332512315270936	0.0106382978723404
Chr6	2169437	2169588	152	LTR/Copia	0.151435582822086	151	0.490066225165563	92.0529801324503	Core	0.811965811965812	5.03065184543009	5.03065184543009	5.03065184543009	0	974.152427962218	347.940921812812	436.612014098732	0	0.0119760479041916
Chr2	3692098	3692617	520	Unspecified	0.150938018348624	519	0.233140655105973	90.6614785992218	Core	1.05227743271222	5.03065184543009	5.03065184543009	5.03065184543009	25.8503620617731	304.075939813489	348.063049198496	147.887186242638	0.0252525252525253	0
Chr8	3188017	3188122	106	DNA/Mite	0.346373805309735	105	0.485714285714286	75.9615384615385	Core	-1.825	5.23377660576055	5.03065184543009	5.03065184543009	0	1.68468530015602	348.076096996111	1167.86080694241	0.0132450331125828	0.0101180438448567
Chr1	7126091	7126724	634	Unspecified	0.156023783783784	633	0.202211690363349	89.7151898734177	Core	1.0978835978836	5.03065184543009	5.03065184543009	5.03065184543009	10.593740148733	320.751286071478	348.118873952852	41.4505076676011	0.0117647058823529	0.0714285714285714
Chr1	7225223	7225860	638	Unspecified	0.096908734939759	637	0.281004709576138	94.4968553459119	Core	1.35489510489511	5.03065184543009	5.03065184543009	5.03065184543009	5.26355642610002	1026.17466239063	348.416160350324	86.1241537244496	0.0135746606334842	0
Chr3	136915	140108	3194	Unspecified	0.234652588344699	3193	0.177262762292515	82.8711256117455	Core	1.21907063197026	5.03065184543009	5.03065184543009	5.03065184543009	1.04875372399737	447.294502863731	348.427586351182	50.7341369766127	0.0411255411255411	0.0425531914893617
Chr2	3796699	3801068	4370	LTR/Copia	0.102179456992927	4359	0.16815783436568	91.4510166358595	Core	1.12574682598954	5.03065184543009	5.03065184543009	5.03065184543009	3.06558780860771	395.820822427134	348.558865507895	20.3548724521553	0.0185614849187935	0.125
Chr2	349035	349836	802	Unspecified	0.148302324455206	801	0.350811485642946	88.7640449438202	Core	0.593950064020487	5.13283576313994	5.42091822520011	5.64192964537463	4075.72964742203	321.286333592755	348.599900831397	222.275207177536	0.0479041916167665	0.0111111111111111
Chr1	7235419	7240515	5097	LTR/Copia	0.055086141238365	4904	0.19637030995106	95.3905771976341	Core	1.26185128671113	5.03065184543009	5.03065184543009	5.03065184543009	3.9422436353283	500.793619376232	348.937689553059	32.5638008552538	0.0233644859813084	0.0227272727272727
Chr8	1553498	1555154	1657	Unspecified	0.0537414121907061	1656	0.246376811594203	94.8671497584541	Core	1.32870588235294	5.03065184543009	5.03065184543009	5.03065184543009	182.045903220523	836.866150431582	349.225698630516	66.4331380968683	0.0191780821917808	0
Chr1	4258065	4260672	2608	Unspecified	0.0689098695318496	2607	0.279248177982355	93.5793925413303	Core	1.50038505968425	5.03065184543009	5.03065184543009	5.03065184543009	5.13832983422811	339.321219427588	349.43251719691	114.080233921702	0.0484171322160149	0.0260869565217391
Chr7	3086211	3093722	7512	LTR/Copia	0.0807820265076209	7501	0.206905745900547	92.8276229836022	Core	1.23470860876833	5.03065184543009	5.03065184543009	5.03065184543009	503.25767116146	729.688125410108	349.466547450157	42.3874634193418	0.0231284236153378	0.0217391304347826
Chr1	595362	598550	3189	Unspecified	0.243992875816993	3188	0.199498117942284	81.913157035586	Core	1.21644535240041	5.03065184543009	5.03065184543009	5.03065184543009	2.1007981719483	568.502789973956	349.470475455782	29.2677135274558	0.00641025641025641	0
Chr1	4448657	4451819	3163	LTR/Gypsy	0.225559630541872	3162	0.291271347248577	82.842509603073	Core	1.52181020733652	5.03065184543009	5.03065184543009	5.03065184543009	3.17711662796547	579.553061637729	349.509740786087	100.077586274967	0.0361851332398317	0.0200400801603206
Chr2	3174783	3175794	1012	DNA/Tc1-Mariner	0.288600199600798	1011	0.508407517309594	77.1428571428572	Core	-0.406837606837607	7.8734296835929	8.23539928250751	9.08193059121854	0	44.4089717142118	349.715597981674	452.724608678433	0.00276446737928492	0.00391319815012451
Chr1	627288	628944	1657	Unspecified	0.0746575633293124	1656	0.202898550724638	92.9951690821256	Core	1.27589268100217	5.03065184543009	5.03065184543009	5.03065184543009	192.159564510552	507.201230451323	350.075137848833	27.100883050347	0.0242718446601942	0
Chr7	3062881	3063332	452	LTR/Gypsy	0.213666124197002	451	0.470066518847007	87.7358490566038	Core	0.015625	5.03065184543009	5.03065184543009	5.03065184543009	0	583.245538404238	350.283958323336	400.448190708736	0.0230366492146597	0.0177095631641086
Chr3	2554972	2555167	196	DNA/Mite	0.216908426395939	195	0.230769230769231	84.0425531914894	Core	1.09150326797386	5.03065184543009	5.03065184543009	5.09975004453444	0	0	350.549663494632	184.138150275941	0	0
Chr1	474981	480965	5985	LTR/Gypsy	0.391258267984998	5984	0.240474598930481	70.5789473684211	Core	1.31571330377919	5.03065184543009	5.03065184543009	5.03065184543009	0.559522294333882	438.530651255723	350.603712512011	68.5969067780056	0.0264390896921017	0.0250783699059561
Chr4	2319733	2321887	2155	LTR/Copia	0.0665337332718043	2154	0.199628597957289	94.150417827298	Core	1.2917569117085	5.03065184543009	5.03065184543009	5.03065184543009	0	377.594862258844	350.639277143905	28.3909344978274	0.0240963855421687	0.0588235294117647
Chr5	2351499	2360510	9012	LTR/Gypsy	0.0727528965517241	1300	0.307692307692308	93.4565050038491	Core	1.65087719298246	5.03065184543009	5.03065184543009	5.03065184543009	533.538849026798	516.871173021897	351.221432975993	59.4278687336484	0.0444444444444444	0.0172413793103448
Chr5	2152521	2159901	7381	LTR/Copia	0.0936875543097407	5666	0.243558065654783	91.8890263297402	Core	1.28329867906067	5.03065184543009	5.03065184543009	5.03065184543009	701.371925369482	684.968066139815	351.479291152157	60.030184890067	0.0252100840336134	0.0165562913907285
Chr3	249151	259485	10335	LTR/Copia	0.0829654989384289	2817	0.178558750443734	92.7629233511586	Core	1.1859943977591	5.03065184543009	5.03065184543009	5.03065184543009	39.8487846802432	581.576908491759	351.914650964915	28.1950342986257	0.021875	0
Chr1	590846	591567	722	Unspecified	0.272316807065217	721	0.248266296809986	81.5905743740795	Core	1.22814455885322	5.03065184543009	5.03065184543009	5.03065184543009	4.64947484305502	1380.48729112452	351.943609184957	85.9993361103563	0.0683760683760684	0.0952380952380952
Chr7	3085963	3095476	9514	LTR/Copia	0.0716677508650519	2002	0.199300699300699	94.0559440559441	Core	1.32879767291532	5.03065184543009	5.03065184543009	5.03065184543009	397.336533896401	698.710830429469	352.102077802328	41.1024193255649	0.0393700787401575	0.09375
Chr8	3054850	3055027	178	Unspecified	0.327373402061856	177	0.587570621468927	78.735632183908	Core	-0.625	5.03065184543009	5.03065184543009	5.03065184543009	0	104.527065214226	352.45392963706	789.329570942955	0.00129366106080207	0.00253485424588086
Chr4	971454	971817	364	Unspecified	0.107744383561644	363	0.512396694214876	90.6077348066298	Core	-0.853682170542636	6.35493506629	6.21892810749622	5.41966625470559	0	127.291470524496	352.91178380199	616.212837577818	0.00702247191011236	0.00884955752212389
Chr8	1041766	1043531	1766	DNA/hAT	0.29551794661191	993	0.51460221550856	77.7063236870311	Core	-0.991563275434243	5.67651561014307	6.03530492931237	8.01145499779609	2294.37350418511	172.823498818727	353.049378966709	450.247701613874	0.00211964201601507	0.00160771704180064
Chr1	3786672	3786879	208	Unspecified	0.217726486486486	207	0.492753623188406	85.5072463768116	Core	1.94298245614035	5.37341608798077	5.28564657311357	5.10471848180467	0	156.495815066921	353.161571125096	608.867592476607	0.02	0
Chr1	730423	730630	208	Unspecified	0.191268235294118	207	0.400966183574879	87.8640776699029	Core	0	5.71849801644341	5.69312219615607	5.37499794034605	0	490.750463552246	353.161571125096	497.113414110648	0.0193548387096774	0.0113960113960114
Chr1	2919564	2919752	189	LTR/Gypsy	0.223876576086957	188	0.537234042553192	86.8263473053892	Core	1.2536231884058	5.03065184543009	5.45595786260369	5.03065184543009	0	657.729970020272	353.33491762982	859.639599951319	0.0100671140939597	0.00864553314121038
Chr1	567253	569379	2127	Unspecified	0.0783742467310972	2126	0.24412041392286	92.6052332195677	Core	1.35360169491525	5.03065184543009	5.03065184543009	5.03065184543009	0	692.501586327099	353.357470922435	48.5643309799659	0.0260960334029228	0.0163934426229508
Chr8	365136	365318	183	Unspecified	0.239519849246231	182	0.538461538461538	86.0335195530726	Core	-0.3	5.13283576313994	5.11924851457382	5.52748735342767	0	1.93599194714062	353.397219543121	962.695500699865	0.0029585798816568	0.00375234521575985
Chr1	589489	590789	1301	Unspecified	0.233715125628141	1300	0.175384615384615	85.7932123125493	Core	1.20975609756098	5.03065184543009	5.03065184543009	5.03065184543009	0	640.942996781761	353.75522373096	17.7223716269343	0.00738007380073801	0
Chr2	3820140	3820273	134	Unspecified	0.238481205673759	133	0.24812030075188	83.969465648855	Core	1.19323671497585	5.03065184543009	5.03065184543009	5.03065184543009	0	845.507816399517	354.11801806783	246.571523113609	0.0357142857142857	0
Chr8	1125993	1128556	2564	Unspecified	0.232168748573602	2563	0.215372610222396	83.5754640839387	Core	1.26983040698047	5.03065184543009	5.03065184543009	5.03065184543009	2.61328796799346	560.499139300621	354.336259173504	48.9565667643174	0.0103626943005181	0.0103092783505155
Chr7	3117076	3117253	178	Unspecified	0.217151491712707	177	0.412429378531073	82.4858757062147	Core	1.78095238095238	5.03065184543009	5.10919404715617	5.10018468709118	0	216.022601442734	354.450835753984	624.69797471771	0.03	0.020746887966805
Chr1	7723081	7723480	400	LTR/Copia	0.234941411192214	398	0.399497487437186	83.2474226804124	Core	0.988461538461539	5.03065184543009	5.03065184543009	5.03065184543009	0	232.435776889868	354.987692423609	457.754487143257	0.0324254215304799	0.0199501246882793
Chr1	472319	472467	149	LTR/Copia	0.165870869565217	148	0.506756756756757	91.8367346938776	Core	0.5	5.13283576313994	5.34793577399623	5.16928288619553	0	241.952898346217	355.041756951849	510.325730764751	0	0
Chr2	2140530	2140669	140	Unspecified	0.310666524822695	139	0.561151079136691	75.9124087591241	Core	-0.631944444444444	5.03065184543009	5.03065184543009	5.2329307917979	24.2581296159392	156.163002605767	355.275644802278	782.335097726318	0.00417246175243394	0.00151057401812689
Chr1	631524	632156	633	Unspecified	0.154730243161094	632	0.189873417721519	89.76	Core	1.09266055045872	5.03065184543009	5.03065184543009	5.03065184543009	5.30526448018957	789.126885572924	355.354348743495	32.7097316426078	0.0285714285714286	0
Chr8	792667	797759	5093	LTR/Copia	0.0520753901705115	4949	0.211759951505355	95.6152758132956	Core	1.28588556441685	5.03065184543009	5.03065184543009	5.03065184543009	172.937449672147	442.337273019477	355.390452450721	43.5824567206284	0.0278514588859416	0.0241545893719807
Chr1	738465	742192	3728	LTR/Gypsy	0.285556120410367	3727	0.27019050174403	76.6113679630133	Core	1.35147190008921	5.03065184543009	5.03065184543009	5.03065184543009	1.79689849006957	418.738795002817	355.464295084929	92.9981672542314	0.0446824224519941	0.0355029585798817
Chr2	3634368	3635004	637	Unspecified	0.134508962406015	636	0.227987421383648	91.3249211356467	Core	1.3	5.03065184543009	5.03065184543009	5.03065184543009	0	569.492610693372	355.606525514566	52.5059544513865	0.0229885057471264	0
Chr1	7143612	7150336	6725	LTR/Copia	0.0884835614035088	3979	0.185222417692888	92.2494319616258	Core	1.22972605741837	5.03065184543009	5.03065184543009	5.03065184543009	453.619446535275	551.578446421453	356.081954293488	127.347384745847	0.00803212851405622	0.0416666666666667
Chr3	2372013	2372412	400	Unspecified	0.181800252525253	399	0.318295739348371	86.8073878627968	Core	0.840692640692641	5.03065184543009	5.03065184543009	5.03065184543009	8.41111026884326	427.01269618025	356.312273365488	184.497995907413	0.083969465648855	0.0333333333333333
Chr6	411186	411321	136	LTR/Gypsy	0.556920357142857	135	0.525925925925926	61.4814814814815	Core	-0.9	5.03065184543009	5.45656207154244	5.17425132346575	0	141.211830532481	356.701080706637	734.598232676292	0.00573613766730402	0.0017921146953405
Chr1	88037	93751	5715	LTR/Copia	0.0814366153846154	5704	0.219670406732118	92.5140252454418	Core	1.28499600467146	5.13283576313994	5.03065184543009	5.03065184543009	4.68772538000996	588.092881645783	356.715312610012	49.6757936573036	0.0230508474576271	0.00833333333333333
Chr2	364560	366727	2168	LTR/Gypsy	0.0729755832180728	2167	0.353945546838948	93.1241347485002	Core	1.82625600698995	5.03065184543009	5.03065184543009	5.03065184543009	0	201.577340660589	356.810061401818	284.770867921359	0.0879961740793878	0.038
Chr1	4420122	4423425	3304	LTR/Gypsy	0.248080616873299	3303	0.303360581289737	79.0415529269033	Core	1.42009389671361	5.03065184543009	5.03065184543009	5.03065184543009	3.04144932192576	608.821390046935	356.883771341017	126.697060420699	0.0365009439899308	0.0393013100436681
Chr1	4423901	4429884	5984	LTR/Gypsy	0.242830710947931	5983	0.323082065853251	79.7944051230199	Core	1.54870792591607	5.03065184543009	5.03065184543009	5.03065184543009	2.7980791432628	699.188896434931	357.125060913241	136.818633639036	0.0336625399916539	0.0287511230907457
Chr1	4458327	4460315	1989	LTR/Gypsy	0.203632242242242	1988	0.348088531187123	83.1637843336724	Core	1.63998398037596	5.03065184543009	5.03065184543009	5.03065184543009	3.36952379164531	579.674182675124	357.203993432551	148.420518129367	0.0404509283819629	0.0241935483870968
Chr1	468440	469079	640	Unspecified	0.0995878260869565	639	0.242566510172144	94.3573667711599	Core	1.32638888888889	5.03065184543009	5.03065184543009	5.03065184543009	0	539.078171469361	357.239618434515	70.9230116945788	0.0121457489878543	0
Chr8	478320	478533	214	Unspecified	0.163945454545455	213	0.572769953051643	92.3809523809524	Core	0.254545454545455	5.23174859430004	5.37853761815125	5.2433495225701	31.5813385566002	187.604012104167	357.257807559848	855.624744610293	0.00333333333333333	0.00209863588667366
Chr1	7196349	7196987	639	Unspecified	0.102123836858006	638	0.286833855799373	94.006309148265	Core	1.4592004381161	5.03065184543009	5.03065184543009	5.03065184543009	0	834.503706232387	357.524566441023	97.2049010980479	0.016	0
Chr8	1559820	1560445	626	LTR/Gypsy	0.183124018838305	625	0.2176	87.8333333333333	Core	1.28341013824885	5.03065184543009	5.03065184543009	5.03065184543009	0	675.278024479206	357.651005813156	25.4435905651942	0.0168067226890756	0
Chr5	241119	241907	789	DNA/Mite	0.111004500632111	788	0.33502538071066	89.9746192893401	Core	1.67272727272727	5.03065184543009	5.11186440223292	5.03065184543009	0	120.886338335973	358.823984029102	418.102529384138	0.0261569416498994	0.0331858407079646
Chr2	571170	571432	263	LTR/Copia	0.0457388721804511	262	0.16793893129771	96.9465648854962	Core	1.33333333333333	5.03065184543009	5.03065184543009	5.03065184543009	12.8261374980828	1141.86807792644	358.861626468185	71.4760176337178	0	0
Chr1	8809894	8810095	202	Unspecified	0.192153846153846	201	0.582089552238806	90	Core	0.229249011857708	5.40450282941279	5.50835534772474	5.09975004453444	0	42.9257814479754	359.363224801616	962.531031081295	0.0078125	0
Chr5	597103	597466	364	Unspecified	0.107744383561644	363	0.512396694214876	90.6077348066298	Core	-0.853682170542636	6.35493506629	6.21892810749622	5.41966625470559	9.2475742734796	123.419486630215	359.707884177819	661.16786665378	0.00884303610906411	0.011070110701107
Chr1	3745447	3747081	1635	Unspecified	0.0912684178375076	1634	0.192778457772338	91.5544675642595	Core	1.16039988891974	5.03065184543009	5.03065184543009	5.03065184543009	2.04998278444557	487.747859736047	359.741475260947	21.1463815769023	0.0271739130434783	0.0232558139534884
Chr5	2184433	2184633	201	LTR/Copia	0.108049019607843	200	0.315	91.5	Core	1.3030303030303	5.03065184543009	5.03065184543009	5.03065184543009	11439.1099656268	738.687942464391	360.286016191125	149.592969654659	0	0
Chr8	1138148	1138515	368	LTR/Copia	0.106640659630607	367	0.196185286103542	92.6430517711172	Core	1.4	5.03065184543009	5.03065184543009	5.03065184543009	0	125.900306912206	360.577954795802	43.3792363734458	0	0
Chr3	3067410	3068147	738	DNA/Mite	0.0855078629032258	737	0.373134328358209	92.9251700680272	Core	1.64888010540184	5.99938165264722	5.95346084733176	5.46926348134598	0	39.9929640819647	360.767136623819	327.890445370589	0.057286432160804	0.0170357751277683
Chr2	3661694	3664681	2988	LTR/Copia	0.0636615320427236	2987	0.166052895882156	94.3307614894331	Core	1.19332890806505	5.03065184543009	5.03065184543009	5.03065184543009	2.24221157870035	188.350750369754	360.989265461005	21.2683195079453	0.0663716814159292	0
Chr6	879237	879367	131	Unspecified	0.0603328358208955	130	0.515384615384615	96.9230769230769	Core	0.105263157894737	5.03065184543009	5.03065184543009	5.20482771781376	0	1.35819590090098	360.991090284219	901.531501979763	0.00383141762452107	0
Chr4	284765	284893	129	Unspecified	0.0692072727272727	128	0.5078125	96.09375	Core	0.375	5.27205695342783	5.22281708988933	5.34688750021642	0	187.623534530762	361.141257429189	1165.75720299805	0	0
Chr2	3664681	3665329	649	Unspecified	0.148771339285714	648	0.183641975308642	89.7356143079316	Core	1.19090909090909	5.03065184543009	5.03065184543009	5.03065184543009	0	132.150152014712	361.233217812624	33.7412684774909	0.0405405405405405	0
Chr8	1896277	1896484	208	Unspecified	0.186792954545455	207	0.400966183574879	88.2926829268293	Core	-0.0473684210526317	5.03065184543009	5.11186440223292	5.03065184543009	0	331.703086283147	361.692043857586	570.331668902139	0.00380228136882129	0.003584229390681
Chr1	602424	603714	1291	Unspecified	0.24235879049676	1290	0.202325581395349	84.5247446975648	Core	1.16130705394191	5.03065184543009	5.03065184543009	5.03065184543009	6723.81153253841	758.597192131698	362.361775308733	329.17571272413	0.0126903553299492	0
Chr4	1327135	1327335	201	LTR/Gypsy	0.395982884615385	200	0.485	73.6559139784946	Core	-0.0666666666666667	5.86565848798579	5.95711410649132	6.67180032307746	0	0	362.935178074884	556.485847115332	0.00174520069808028	0
Chr1	7648945	7649460	516	Unspecified	0.294201882352941	515	0.578640776699029	77.4390243902439	Core	-0.476430976430976	7.0864069503769	5.14536808661724	5.10018468709118	0	113.509769095337	363.0794903954	763.723526607085	0.00296823983377857	0.00322432058959005
Chr6	3462834	3464014	1181	LTR/Copia	0.0724880811496196	1180	0.190677966101695	93.3050847457627	Core	1.21028037383178	5.03065184543009	5.03065184543009	5.03065184543009	0	736.643293824287	363.379326504929	35.0124523604504	0.0204081632653061	0
Chr1	587922	588789	868	Unspecified	0.214996145374449	867	0.171856978085352	84.8484848484848	Core	1.1422619047619	5.03065184543009	5.03065184543009	5.03065184543009	3.86561418822127	1006.53137910015	364.239365160845	19.2501622844286	0.0277777777777778	0
Chr6	3468571	3469346	776	Unspecified	0.294025509138381	775	0.20258064516129	79.2717086834734	Core	1.31551724137931	5.03065184543009	5.03065184543009	5.03065184543009	0	302.877685900918	364.396666607655	30.7689932416301	0.0892857142857143	0
Chr1	7152429	7153011	583	Unspecified	0.125953595890411	582	0.187285223367698	88.659793814433	Core	1.05987445678416	5.03065184543009	5.03065184543009	5.03065184543009	63.3801045731425	944.189270530129	364.763601337168	23.2276771700155	0	0
Chr3	163592	164182	591	Unspecified	0.108306644067797	590	0.193220338983051	90.4436860068259	Core	1.25	5.03065184543009	5.03065184543009	5.03065184543009	5.68356856875996	257.010326537894	364.881195123621	21.5644149578012	0	0
Chr4	2330933	2335514	4582	Unspecified	0.214255335968379	4581	0.239685658153242	84.2356687898089	Core	1.3672263868066	5.03065184543009	5.03065184543009	5.03065184543009	559.886105991639	359.251415718686	364.999557717489	51.30494488814	0.0435393258426966	0.0590062111801242
Chr5	607802	612543	4742	Unspecified	0.0376468511892233	4741	0.546298249314491	96.5604557923613	Core	-0.664647610869165	7.78673059940918	6.71780577591166	6.69721861348643	577.711962777571	83.6854983193115	365.135547344157	720.485187822303	0.00286532951289398	0.0035740878629933
Chr5	4116519	4117258	740	DNA/Mite	0.118521197846568	739	0.315290933694181	89.4451962110961	Core	1.4051724137931	5.27247524536016	5.1977907162999	5.03065184543009	0	141.25789481525	365.266057636564	258.159357929775	0.047244094488189	0.0196850393700787
Chr7	2547866	2547993	128	Unspecified	0.0957990769230769	127	0.551181102362205	92.9133858267717	Core	-0.144736842105263	5.41629755497831	5.43184284062494	5.10018468709118	0	0	365.402122474574	664.683513526929	0	0.00446428571428571
Chr3	1933320	1933430	111	Unspecified	0.0734758928571428	110	0.4	94.5454545454545	Core	2	5.03065184543009	5.03065184543009	5.03065184543009	0	1.60740615794703	365.965106345604	553.503137139343	0.0344827586206897	0
Chr6	3438727	3438993	267	LTR/Copia	0.150769925373134	266	0.176691729323308	88.8030888030888	Core	1.27906976744186	5.03065184543009	5.03065184543009	5.03065184543009	0	15.2066688225404	366.707318015028	22.467170536813	0	0.142857142857143
Chr5	2356324	2359118	2795	LTR/Gypsy	0.360628676258993	2794	0.205798138869005	72.1143275925247	Core	1.2755809021068	5.03065184543009	5.03065184543009	5.03065184543009	3.59572705370528	526.562776437166	367.184776461278	33.1121958418789	0.0304471931493815	0.0103092783505155
Chr1	7137057	7143038	5982	LTR/Gypsy	0.220428395185557	5981	0.348938304631333	81.4927389395475	Core	1.64513653569242	5.03065184543009	5.03065184543009	5.03065184543009	1.67940897341118	1155.10813841132	367.323867661578	188.76931713238	0.0214639515685195	0.0172413793103448
Chr8	1889050	1895391	6342	LTR/Gypsy	0.0727862251655629	6341	0.358776218262104	93.0768017662829	Core	1.75072808320951	5.03065184543009	5.03065184543009	5.03065184543009	2.11206428201869	513.075425457485	367.503798419214	256.245049283927	0.0691087053240397	0.0280599903241413
Chr8	1089552	1094614	5063	LTR/Copia	0.0572484784805011	4916	0.199552481692433	95.0772986167616	Core	1.22739655320735	5.03065184543009	5.03065184543009	5.03065184543009	0.661454630902908	622.936107145777	367.56645673395	40.7821392343124	0.0319148936170213	0.01875
Chr1	599150	602362	3213	Unspecified	0.197772423228945	3212	0.187110834371108	85.2931854199683	Core	1.20604895052361	5.03065184543009	5.03065184543009	5.03065184543009	6.25528848396067	763.578496854522	367.65460785659	25.340580077076	0.0229276895943563	0
Chr1	7126724	7127243	520	LTR/Copia	0.117177958015267	519	0.146435452793834	90.4854368932039	Core	1.25287356321839	5.03065184543009	5.03065184543009	5.03065184543009	0	535.768952908306	367.739128003089	10.7275679139738	0	0
Chr1	591671	592305	635	Unspecified	0.119737435897436	634	0.225552050473186	92.7215189873418	Core	1.33508663366337	5.03065184543009	5.03065184543009	5.03065184543009	0	1052.62757098785	367.834523275389	64.5857208849194	0.0158730158730159	0
Chr5	2204100	2207313	3214	LTR/Copia	0.0800612625653398	2453	0.284141867101508	93.5970636215334	Core	1.27548898814107	5.13283576313994	5.48126893773481	5.25693637281563	2.08444700311309	266.356508514581	367.923113323641	138.155845058978	0.0456960680127524	0.0158730158730159
Chr8	1087593	1088885	1293	Unspecified	0.266461687183201	1292	0.210526315789474	83.9126919967664	Core	1.34959634959635	5.03065184543009	5.03065184543009	5.03065184543009	5.18609122695525	792.029151679239	367.925698370236	57.1859971990452	0.00664451827242525	0
Chr8	1885346	1887949	2604	Unspecified	0.0724863248847926	2603	0.310026892047637	93.1233192470227	Core	1.47938427707532	5.03065184543009	5.03065184543009	5.03065184543009	0	507.508533111721	368.069244303105	164.44264942996	0.0551181102362205	0.0378071833648393
Chr3	1933730	1934231	502	Unspecified	0.132664831683168	501	0.383233532934132	88.4231536926148	Core	1.05146198830409	5.17489244698057	5.11186440223292	5.09975004453444	9353.25555227693	137.362500633521	368.325339454371	373.898652073641	0.0126582278481013	0.0107991360691145
Chr5	1558600	1558779	180	Unspecified	0.178686787564767	179	0.396648044692737	89.3854748603352	Core	-0.478571428571429	5.1295646765902	5.03065184543009	5.15868736440645	0	153.552439942311	369.225697304482	434.828103928768	0	0.0177777777777778
Chr6	3083833	3085265	1433	LINE/I	0.149246406685237	1432	0.432960893854749	86.6620111731844	Core	1.08935381933094	5.68575330548616	5.59123898496908	5.76961367484014	2.33935841160001	197.6132325248	369.261571653335	458.496702436442	0.0337873695382982	0.0173217854763491
Chr5	2193503	2194419	917	LTR/Copia	0.0916581976112921	916	0.210698689956332	91.8122270742358	Core	1.32005965697241	5.03065184543009	5.03065184543009	5.03065184543009	3.65860315519084	568.705568865784	369.892485186	229.476160415528	0.0078125	0
Chr1	651804	653407	1604	LTR/Copia	0.0832231382316314	1603	0.201497192763568	92.3797626483448	Core	1.1784212423405	5.03065184543009	5.03065184543009	5.03065184543009	2.08965161485619	959.046542631142	370.103239068723	36.1737340020513	0.0123456790123457	0
Chr2	3819015	3819650	636	Unspecified	0.122270770392749	635	0.195275590551181	91.9685039370079	Core	1.1537037037037	5.03065184543009	5.03065184543009	5.03065184543009	15.8404821151401	126.845642725943	370.303246615936	31.3028401275259	0	0
Chr4	3487843	3487993	151	LTR/Copia	0.287149342105263	150	0.62	81.7518248175183	Core	1.76190476190476	5.23377660576055	5.10919404715617	5.17425132346575	0	1.1758877262834	370.325569280804	1371.90474228705	0.00395256916996047	0.00212765957446809
Chr5	2206137	2206769	633	Unspecified	0.121155569044006	632	0.330696202531646	92.0886075949367	Core	1.23723723723724	5.03065184543009	5.03065184543009	5.03065184543009	5.30526448018957	307.376306238292	370.392855665242	149.709925595012	0.036468330134357	0
Chr3	2778465	2778806	342	LTR/Gypsy	0.209881267605634	341	0.255131964809384	85.3731343283582	Core	1.14658925979681	5.03065184543009	5.03065184543009	5.03065184543009	9.84594672646946	48.4396573362508	371.095635563872	198.460006408514	0.106666666666667	0.04
Chr1	59523	59996	474	LTR/Gypsy	0.343655102040816	473	0.264270613107822	75.2173913043478	Core	1.45242502776749	5.03065184543009	5.03065184543009	5.03065184543009	0	1095.41664694721	371.187616683117	132.026360195495	0.0222222222222222	0
Chr7	3084233	3085289	1057	LTR/Copia	0.0605950561797753	1056	0.204545454545455	95.1704545454545	Core	1.35598290598291	5.03065184543009	5.03065184543009	5.03065184543009	0	782.537120351525	371.61003234448	43.6423900348581	0.0833333333333333	0
Chr6	2218005	2218160	156	LTR/Copia	0.189495882352941	155	0.458064516129032	89.6774193548387	Core	1.80808080808081	5.03065184543009	5.03065184543009	5.03065184543009	0	2115.00205968159	371.995082352672	131.447536712133	0	0
Chr5	3711544	3711774	231	LTR/Copia	0.0983311965811966	230	0.195652173913043	92.1739130434783	Core	1.03716216216216	5.03065184543009	5.03065184543009	5.03065184543009	0	924.237483096949	372.174467555939	69.3310066055946	0.0133333333333333	0
Chr5	2020169	2020659	491	LTR/Gypsy	0.214937087378641	490	0.363265306122449	84.8049281314168	Core	1.53133903133903	5.03065184543009	5.03065184543009	5.03065184543009	6.84585252965157	865.287443736578	372.298439402278	278.412197129327	0.0499325236167341	0.0214285714285714
Chr7	794693	794914	222	Unspecified	0.165491818181818	221	0.583710407239819	91.0798122065728	Core	0.916666666666667	5.03065184543009	5.03065184543009	5.03065184543009	15.2164631227255	0.796396687346483	373.022062641375	640.484566136569	0.00268456375838926	0.00665188470066519
Chr1	7154803	7155385	583	Unspecified	0.143322866894198	582	0.18213058419244	88.1944444444444	Core	1.26943881000676	5.03065184543009	5.03065184543009	5.03065184543009	0	1142.01365937323	373.534865382589	25.2771780967815	0	0
Chr1	7130005	7132571	2567	Unspecified	0.229345501138952	2566	0.182774746687451	83.6480514262756	Core	1.14933694996986	5.03065184543009	5.03065184543009	5.03065184543009	3.91534723625686	619.543840129112	373.652664573036	27.5445466984137	0.0342741935483871	0.046875
Chr5	2029262	2029505	244	LTR/Gypsy	0.137996693548387	243	0.255144032921811	88.8888888888889	Core	1.47058823529412	5.03065184543009	5.03065184543009	5.03065184543009	0	809.428633139426	373.966054623921	173.857526275228	0.0481927710843374	0
Chr6	440147	443023	2877	LTR/Copia	0.0903080955654864	2875	0.241391304347826	92.4521739130435	Core	1.21350780639476	5.03065184543009	5.03065184543009	5.10471848180467	1.16439022156508	239.927313662011	374.070872462786	83.2496583404064	0.0328746177370031	0.0188679245283019
Chr5	1546620	1553930	7311	LTR/Gypsy	0.207775605725247	6761	0.346102647537347	82.4002382370459	Core	1.59252705025786	5.03065184543009	5.03065184543009	5.03065184543009	1.83205466520707	466.004836837247	374.079611443864	220.263725815552	0.0526456678861426	0.031166518254675
Chr8	1124206	1125390	1185	Unspecified	0.25140549132948	1184	0.219594594594595	81.2987012987013	Core	1.27898550724638	5.03065184543009	5.03065184543009	5.03065184543009	0	613.299501357898	375.371085931579	55.3607794715213	0.0166204986149584	0
Chr1	8997285	8997499	215	LTR/Gypsy	0.30834140969163	214	0.453271028037383	78.5714285714286	Core	0.258333333333333	7.36326504942674	7.17295387659736	6.26244342248469	0	0	375.380849397329	1097.58632652221	0.00130378096479791	0
Chr1	616755	617402	648	Unspecified	0.126119911111111	647	0.273570324574961	91.7956656346749	Core	1.28879310344828	5.03065184543009	5.03065184543009	5.03065184543009	0	973.132645702508	375.393620494168	113.669043918189	0.0118110236220472	0
Chr1	461447	462151	705	LTR/Gypsy	0.179252965686275	704	0.232954545454545	84.863523573201	Core	1.26246105919003	5.03065184543009	5.03065184543009	5.03065184543009	0	180.44105883435	375.452436572585	119.697073566444	0.0222222222222222	0
Chr7	442134	442310	177	Unspecified	0.193865052083333	176	0.556818181818182	90.1734104046243	Core	0.3	5.03065184543009	5.03065184543009	5.03065184543009	0	120.142128833984	375.555280686845	841.470427172101	0.00152671755725191	0
Chr1	7183195	7185456	2262	LTR/Copia	0.136328376709307	2253	0.225477141588992	89.7319400272603	Core	1.23849878934625	5.03065184543009	5.03065184543009	5.03065184543009	2.9624972451324	913.868722609237	375.870746411713	49.7028157642563	0.0062111801242236	0
Chr3	159866	160363	498	Unspecified	0.21830476861167	497	0.187122736418511	83.2985386221294	Core	1.24358974358974	5.03065184543009	5.03065184543009	5.03065184543009	0	386.091829514789	375.901472429327	27.2082266850383	0	0
Chr1	990878	991001	124	Unspecified	0.164540303030303	123	0.544715447154472	90.983606557377	Core	-0.551282051282051	5.62787385276835	5.15577052953699	5.61031645922789	0	1.43612517390349	375.942128635303	689.729858337788	0.00746268656716418	0.00531914893617021
Chr1	669708	677202	7495	LTR/Copia	0.088005044200375	7426	0.229060059251279	92.2340568963193	Core	1.27437094933873	5.03065184543009	5.03065184543009	5.03065184543009	1605.67904202277	803.222337321312	376.033438640147	44.3906273509502	0.0193955796120884	0.0167364016736402
Chr1	7115709	7118481	2773	LTR/Copia	0.0856048775216138	2762	0.212889210716872	92.3244026068067	Core	1.19237979429498	5.13283576313994	5.03065184543009	5.03065184543009	1.20809162287969	663.081433866678	376.441665277979	51.4234155905137	0.0103857566765579	0.0148148148148148
Chr1	544436	545987	1552	LTR/Copia	0.12852846692112	1538	0.182704811443433	90.4918032786885	Core	1.08221436984688	5.03065184543009	5.03065184543009	5.03065184543009	2.15975605612878	454.408535670471	376.624223611001	36.3629947225923	0.00529100529100529	0
Chr1	595036	595353	318	Unspecified	0.103752388535032	317	0.261829652996845	91.5857605177994	Core	0.780564263322884	5.03065184543009	5.03065184543009	5.03065184543009	0	1259.71810190907	377.036096709319	61.547723506438	0.0114942528735632	0
Chr2	1708399	1708516	118	Unspecified	0.076792	117	0.47008547008547	94.8717948717949	Core	1.1	5.6919090168282	5.92424668582959	5.70519198501876	0	382.133100152632	377.208679603754	906.756925832006	0	0.0169971671388102
Chr8	761704	762092	389	LTR/Gypsy	0.344686315789474	388	0.154639175257732	74.7222222222222	Core	1.21917808219178	5.03065184543009	5.03065184543009	5.03065184543009	0	549.61660789793	377.337856636712	30.7689932416301	0.0303030303030303	0
Chr8	740283	740778	496	Unspecified	0.240580534653465	495	0.24040404040404	81.9875776397515	Core	1.29519450800915	5.03065184543009	5.03065184543009	5.03065184543009	0	268.840306845951	377.779064905335	100.43522591524	0.00699300699300699	0
Chr1	7151080	7152367	1288	Unspecified	0.246775	1287	0.201243201243201	84.1307814992026	Core	1.28991596638655	5.03065184543009	5.03065184543009	5.03065184543009	5.20625487869303	785.571637506035	377.964948762209	50.0008103237626	0.0111358574610245	0.037037037037037
Chr5	3710909	3711544	636	Unspecified	0.105253393665158	635	0.261417322834646	93.7007874015748	Core	1.32487961476726	5.03065184543009	5.03065184543009	5.03065184543009	0	400.434283899546	378.064093101899	83.8916115417695	0.0173611111111111	0
Chr8	2922921	2923449	529	Unspecified	0.133631247739602	528	0.301136363636364	91.2878787878788	Core	1.37693498452012	5.03065184543009	5.03065184543009	5.03065184543009	0	248.016364947447	378.13141407982	213.899968956425	0.0211640211640212	0
Chr8	2919583	2920228	646	Unspecified	0.104228614008942	645	0.257364341085271	93.4883720930233	Core	1.30384068278805	5.03065184543009	5.03065184543009	5.03065184543009	57.1798769518568	947.04427190013	378.196654144361	70.8785737173266	0.0253623188405797	0.0285714285714286
Chr5	2347036	2348552	1517	Unspecified	0.126616152849741	1516	0.260554089709763	89.8282694848085	Core	1.1728876750336	5.03065184543009	5.03065184543009	5.09975004453444	0	326.359682753921	378.365598877685	116.325073063208	0.0464788732394366	0.0153452685421995
Chr2	231292	231469	178	Unspecified	0.15324972972973	177	0.451977401129944	89.7727272727273	Core	0.0314285714285714	5.03065184543009	5.03065184543009	5.03065184543009	0	0.995495859183104	378.41370915707	1021.61798753474	0.00232558139534884	0.00269541778975741
Chr7	2002169	2002502	334	LTR/Copia	0.154055015384615	323	0.229102167182663	88.5350318471338	Core	1.19852941176471	5.03065184543009	5.03065184543009	5.03065184543009	0	911.394449971153	378.449797821833	118.358678520741	0.157894736842105	0.2
Chr3	259485	260123	639	Unspecified	0.121927643504532	638	0.264890282131661	92.259083728278	Core	1.48888888888889	5.03065184543009	5.03065184543009	5.03065184543009	5.25529338618464	969.003479583619	378.49051323849	88.4813843328384	0.0186335403726708	0
Chr6	3464684	3469696	5013	LTR/Copia	0.0671096598639456	4827	0.206960845245494	94.167704441677	Core	1.27678894927536	5.03065184543009	5.03065184543009	5.03065184543009	30.0624595719383	602.438891050804	378.563347601872	43.4069381408365	0.037109375	0
Chr8	758934	761500	2567	Unspecified	0.244653438556934	2566	0.203039750584567	82.2619047619048	Core	1.27539503386005	5.03065184543009	5.03065184543009	5.03065184543009	3.91534723625686	724.39497514545	379.54451076909	41.3168200476205	0.0211480362537764	0.0465116279069767
Chr1	7219489	7227696	8208	LTR/Copia	0.0835241380232714	7431	0.201453371013323	92.6609210880689	Core	1.2210615471485	5.13283576313994	5.10919404715617	5.03065184543009	90.1565241319663	564.395443252465	380.022476685584	43.2423216498201	0.0215488215488215	0.00735294117647059
Chr1	7412147	7412342	196	Unspecified	0.34935690821256	195	0.502564102564103	75.1295336787565	Core	0.245714285714286	5.03065184543009	5.03065184543009	5.03065184543009	0	125.535106696162	380.441495265493	636.299608175752	0.0072202166064982	0.00535475234270415
Chr1	4457851	4458327	477	LTR/Gypsy	0.226601593625498	476	0.340336134453782	83.7894736842105	Core	1.40555555555556	5.03065184543009	5.03065184543009	5.03065184543009	7.04762502526235	724.43595930246	381.051727237848	206.398406664855	0.0581196581196581	0.0116279069767442
Chr2	3914293	3914935	643	Unspecified	0.143843725782414	642	0.213395638629283	90.1869158878505	Core	1.22935779816514	5.03065184543009	5.03065184543009	5.03065184543009	5.22249904368115	94.3003253815883	381.337416474906	40.8685192604117	0.0684931506849315	0
Chr5	2184633	2185411	779	LTR/Copia	0.0987222733077906	778	0.218508997429306	91.2596401028278	Core	1.23996062992126	5.03065184543009	5.03065184543009	5.03065184543009	2934.01609401125	779.300295139354	381.761161174178	62.3220612145142	0.0078125	0.0476190476190476
Chr1	7129355	7129942	588	Unspecified	0.110949134125637	587	0.146507666098807	89.9488926746167	Core	1.15254237288136	5.03065184543009	5.03065184543009	5.03065184543009	0	298.988517433833	382.04289860165	13.5467581166221	0	0.111111111111111
Chr2	349836	352419	2584	Unspecified	0.0615603636363636	2583	0.311265969802555	94.1905499612703	Core	1.55858417491911	5.03065184543009	5.03065184543009	5.03065184543009	1264.10973657034	279.571633389176	382.081922058917	184.009781309831	0.0644521566683193	0.0456140350877193
Chr4	3070931	3071191	261	LTR/Gypsy	0.125908951310861	260	0.226923076923077	90.7335907335907	Core	1.23923444976077	5.03065184543009	5.03065184543009	5.03065184543009	0	286.825803072123	382.665808475539	67.430426887835	0	0
Chr7	3108311	3111415	3105	Unspecified	0.201496838444515	3104	0.196842783505155	85.4063018242123	Core	1.26058377896613	5.03065184543009	5.03065184543009	5.03065184543009	1261.15694034887	610.091706571487	382.999256864495	34.9207745726874	0.0223325062034739	0.0133333333333333
Chr1	7101895	7102484	590	Unspecified	0.108586869712352	589	0.213921901528014	90.1528013582343	Core	1.35051546391753	5.03065184543009	5.03065184543009	5.03065184543009	0	401.069705879321	383.134286542315	46.5773484428146	0.00719424460431655	0
Chr6	3439663	3444795	5133	LTR/Copia	0.0522344037804142	4940	0.2	95.5659040291557	Core	1.2654489146331	5.03065184543009	5.03065184543009	5.03065184543009	642.644232838554	427.688768657812	384.094052799549	39.9163372858287	0.0587084148727984	0.0506329113924051
Chr6	3444832	3445026	195	Unspecified	0.111422660098522	194	0.329896907216495	93.298969072165	Core	1.80952380952381	5.03065184543009	5.03065184543009	5.03065184543009	0	733.510233900056	384.23370755484	322.883119234578	0.020979020979021	0.0714285714285714
Chr6	3440086	3440861	776	Unspecified	0.26923311827957	775	0.212903225806452	81.3583815028902	Core	1.32692307692308	5.03065184543009	5.03065184543009	5.03065184543009	0	259.868149039054	385.057162969833	26.6664608094128	0.074468085106383	0
Chr3	2499067	2499202	136	LTR/Copia	0.212426092715232	135	0.42962962962963	89.5522388059701	Core	2.06666666666667	5.03065184543009	5.03065184543009	5.03065184543009	0	1674.92921214915	385.55190341085	207.346275352179	0.0476190476190476	0
Chr4	4044768	4045061	294	Unspecified	0.304176797153025	293	0.627986348122867	83.0578512396694	Core	-0.598014888337469	5.31738472381821	5.19040660395899	8.85181176471196	0	82.2034114952843	385.758493984386	834.61947900567	0.00520532099479468	0.0006635700066357
Chr3	168502	168886	385	LTR/Copia	0.156386684073107	374	0.262032085561497	88.1401617250674	Core	0.915771622385529	5.03065184543009	5.03065184543009	5.03065184543009	0	265.326938134233	385.866913580419	136.797497889942	0.0512820512820513	0.0714285714285714
Chr8	1884646	1886142	1497	Unspecified	0.115814402102497	1496	0.336229946524064	90.7568653717348	Core	0.981086630340362	5.03065184543009	5.03065184543009	5.03065184543009	0	495.502570369368	386.483480598806	202.309732285335	0.0356394129979036	0.055205047318612
Chr5	1707512	1707613	102	Unspecified	0.315185185185185	101	0.534653465346535	78	Core	-1.3	5.23377660576055	5.03065184543009	5.61197650200242	0	0	386.601024236458	555.68801794384	0.00427350427350427	0.0100502512562814
Chr1	8352301	8352422	122	Unspecified	0.113184330708661	121	0.454545454545455	93.3884297520661	Core	0.571428571428571	5.7031754167336	6.19678899628324	5.54418350995353	0	0	386.601024236458	1031.99203332427	0	0.00209643605870021
Chr4	1236437	1236617	181	LTR/Gypsy	0.236057074468085	180	0.422222222222222	86.3905325443787	Core	-0.416666666666667	5.13283576313994	5.71403983511473	5.03065184543009	0	0	386.797368078122	494.486943341885	0.0197530864197531	0.029045643153527
Chr2	2331434	2331616	183	LTR/Gypsy	0.24865445026178	182	0.461538461538462	84	Core	0.0140350877192983	5.60445677733004	5.73987641232704	5.95685749492198	0	143.263404088406	387.377721422267	684.193613253663	0	0.00600600600600601
Chr3	1748436	1749070	635	Unspecified	0.0877305900151286	634	0.274447949526814	95.2681388012618	Core	1.36324786324786	5.03065184543009	5.03065184543009	5.03065184543009	0	447.567389504957	387.822512464693	92.802783407457	0.0273037542662116	0
Chr8	729299	729454	156	LTR/Gypsy	0.252510191082803	155	0.251612903225806	84.5070422535211	Core	1.13793103448276	5.03065184543009	5.03065184543009	5.03065184543009	0	1171.84083995268	387.970331288063	126.292731350873	0.0201005025125628	0
Chr5	2123378	2123556	179	Unspecified	0.109074759358289	178	0.50561797752809	94.3502824858757	Core	0.693602693602694	5.1295646765902	5.10919404715617	5.20439307525702	0	373.181588974674	388.189523565626	932.874154417424	0.00119047619047619	0
Chr7	3115213	3115534	322	Unspecified	0.128325318471338	321	0.277258566978193	89.9022801302931	Core	1.2669220945083	5.03065184543009	5.03065184543009	5.03065184543009	0	810.881152097597	388.24847178292	88.0666278437783	0.0588235294117647	0.0158730158730159
Chr1	603753	604460	708	Unspecified	0.263354465753425	707	0.247524752475248	82.1005917159763	Core	1.2846687211094	5.03065184543009	5.03065184543009	5.03065184543009	0	806.7972219886	388.542492166566	64.0919000866024	0.0253164556962025	0
Chr8	1129269	1130559	1291	Unspecified	0.259479934829833	1290	0.244961240310078	84.4229217110573	Core	1.3786580616446	5.03065184543009	5.03065184543009	5.03065184543009	0	601.875715240846	388.80954972931	67.7443000928986	0.026685393258427	0
Chr2	366727	367358	632	Unspecified	0.27426346749226	631	0.385103011093502	82.0338983050847	Core	0.969953051643193	5.03065184543009	5.03065184543009	5.03065184543009	0	283.94702208217	388.832487579814	284.774358402059	0.0479192938209332	0.0300546448087432
Chr5	2381417	2383328	1912	LTR/Gypsy	0.0965151436031332	1911	0.282574568288854	91.151832460733	Core	1.63974808673469	5.03065184543009	5.03065184543009	5.03065184543009	0	774.214329353377	388.901125522967	139.441533298548	0.0233812949640288	0.0121951219512195
Chr5	3467119	3467986	868	LINE/I	0.378253844311377	867	0.557093425605536	72.5888324873096	Core	-0.286178107606679	5.03065184543009	5.11924851457382	5.27206568931819	3.86561418822127	26.5036403340943	388.995466859799	656.797203656816	0.00432172869147659	0.001499700059988
Chr6	1468168	1468906	739	DNA/Mite	0.139839771505376	738	0.319783197831978	87.9240162822252	Core	1.48040752351097	5.13283576313994	5.03065184543009	5.03065184543009	0	100.084479215782	389.366888231242	302.671705838766	0.0267857142857143	0.0213903743315508
Chr1	7102546	7105109	2564	Unspecified	0.243358207440812	2563	0.210300429184549	82.4394119984108	Core	1.18596837944664	5.03065184543009	5.03065184543009	5.03065184543009	0	581.630695430915	389.385780744867	43.069384685064	0.0224867724867725	0.010752688172043
Chr1	678914	679123	210	LTR/Copia	0.123342663551402	209	0.301435406698565	90.4306220095694	Core	1.53272727272727	5.03065184543009	5.03065184543009	5.03065184543009	0	1196.96890576085	389.473496881571	112.587888250984	0.0272727272727273	0
Chr7	3116112	3116748	637	Unspecified	0.150428330827068	636	0.356918238993711	89.622641509434	Core	1.17087912087912	5.1295646765902	5.03065184543009	5.10018468709118	416.4757938157	302.404990949581	389.645126789501	176.895060830266	0.0179775280898876	0.00881057268722467
Chr1	6924543	6924682	140	Unspecified	0.357922916666667	139	0.60431654676259	78.8617886178862	Core	-1.04444444444444	5.13283576313994	5.2811073641916	5.25416725658962	0	0	389.657158815402	949.156552388547	0.00449438202247191	0.00410958904109589
Chr1	749929	754086	4158	Unspecified	0.0861334925943622	4157	0.296127014674044	92.5337186897881	Core	1.49242745385179	5.31278360448795	5.33812374981348	5.19782060273641	1.61098262127027	468.413857190445	389.763785262454	147.2691674119	0.0667793744716822	0.0343878954607978
Chr2	233099	233288	190	Unspecified	0.282222475728155	189	0.571428571428571	83.0601092896175	Core	-0.206349206349206	5.1295646765902	5.11186440223292	5.03065184543009	0	185.458760489516	389.77907907786	836.065558912465	0.00297176820208024	0.00346420323325635
Chr2	3633903	3634434	532	LTR/Copia	0.253580684931507	531	0.199623352165725	87.3517786561265	Core	1.30337078651685	5.03065184543009	5.03065184543009	5.03065184543009	0	745.126772304479	389.916641940029	41.9387183353842	0.0303030303030303	0.0434782608695652
Chr8	748367	753497	5131	LTR/Copia	0.0533015305719921	5037	0.193170538018662	95.4527402700556	Core	1.26192454079998	5.03065184543009	5.03065184543009	5.03065184543009	31.9815699869334	378.289202856013	389.96551320117	35.5208200200851	0.0206540447504303	0.032258064516129
Chr2	231696	231896	201	Unspecified	0.198866359447005	200	0.515	88	Core	0.257692307692308	5.03065184543009	5.03065184543009	5.03065184543009	0	0.880438548825258	390.309850873719	757.937712916939	0.00647948164146868	0.0110236220472441
Chr5	2194404	2195055	652	Unspecified	0.0960577794117647	651	0.2642089093702	94.6236559139785	Core	1.24761904761905	5.03065184543009	5.03065184543009	5.03065184543009	0	266.584601896689	390.656279735441	109.305665068074	0.0176211453744493	0.107142857142857
Chr8	1074484	1075121	638	Unspecified	0.0937811596385542	637	0.291993720565149	94.6624803767661	Core	1.37601569066966	5.03065184543009	5.03065184543009	5.03065184543009	0	792.014001173979	390.96658754616	134.178935150411	0.0276497695852535	0
Chr1	4435312	4435677	366	Unspecified	0.079891689373297	365	0.287671232876712	92.8767123287671	Core	1.46	5.03065184543009	5.03065184543009	5.03065184543009	12949.042903559	1920.05990352068	391.042494544869	112.315278352071	0.0632911392405063	0
Chr1	7199153	7201199	2047	LTR/Gypsy	0.173761314009662	2046	0.256109481915934	85.7283464566929	Core	1.31533561979422	5.03065184543009	5.03065184543009	5.03065184543009	31.1025994391162	1069.23557201883	391.327198126879	93.358692501218	0.0179856115107914	0
Chr1	60564	62834	2271	Unspecified	0.289719920318725	2270	0.28942731277533	76.0532150776053	Core	1.4518060816387	5.03065184543009	5.03065184543009	5.03065184543009	1367.67099570236	2017.23876300251	391.573135650373	115.454917787236	0.0316229116945107	0.0259365994236311
Chr1	7143038	7143520	483	LTR/Gypsy	0.274294793713163	482	0.350622406639004	80.04158004158	Core	1.2090395480226	5.03065184543009	5.03065184543009	5.03065184543009	0	676.059657749098	391.642693235194	250.860049680617	0.0201793721973094	0.00465116279069767
Chr8	784950	798927	13978	LTR/Copia	0.0900560594795539	7485	0.230460921843687	92.1214553237025	Core	1.30853609892302	5.03065184543009	5.03065184543009	5.03065184543009	1606.26448012446	546.331774442125	391.653070976916	53.846618796586	0.0333333333333333	0.0230263157894737
Chr8	1548889	1549079	191	Unspecified	0.293375454545455	190	0.3	82.7586206896552	Core	1.62987012987013	5.03065184543009	5.03065184543009	5.03065184543009	17.7122851164001	2539.11489873674	392.365637873461	201.610165240396	0	0
Chr6	551276	552100	825	Unspecified	0.0761523486682809	824	0.234223300970874	92.9611650485437	Core	1.44078947368421	5.03065184543009	5.03065184543009	5.03065184543009	0	196.070348469191	392.451498147912	143.238449339803	0.0725388601036269	0.140350877192982
Chr3	624078	624203	126	Unspecified	0.231351851851852	125	0.464	84.8	Core	0.982456140350877	6.00902303012691	5.32182061257464	5.45848724298488	0	0	392.553092791418	976.295192816079	0	0.00327868852459016
Chr5	2038057	2038670	614	LTR/Gypsy	0.17574656	613	0.262642740619902	86.1842105263158	Core	1.28405352050888	5.03065184543009	5.03065184543009	5.03065184543009	10.9399408071883	1170.33876590185	392.803179705492	145.926475300378	0.0217391304347826	0
Chr7	3065081	3065551	471	LTR/Gypsy	0.236709512711864	470	0.429787234042553	82.6280623608018	Core	0.908730158730159	5.03065184543009	5.03065184543009	5.03065184543009	0	172.218661046227	393.045623593762	293.670030804923	0.0181956027293404	0.00715990453460621
Chr1	731499	737840	6342	LTR/Gypsy	0.0636727321797111	6295	0.304209690230342	93.9774352455109	Core	1.6480614973262	5.03065184543009	5.03065184543009	5.03065184543009	814.728796788708	625.633661366585	393.086874514012	145.683417953506	0.0580539656582175	0.0326530612244898
Chr5	3296781	3296911	131	Unspecified	0.0454676691729323	130	0.515384615384615	97.6923076923077	Core	0.230263157894737	5.27123217027093	5.19040660395899	5.10018468709118	0	0	393.684622989205	910.762199952252	0	0
Chr1	562159	563040	882	Unspecified	0.256874698133919	881	0.199772985244041	81.6802800466745	Core	1.12335159261513	5.03065184543009	5.03065184543009	5.03065184543009	0	986.138198106783	393.789886257384	51.4191834785696	0.00598802395209581	0
Chr7	3066558	3069751	3194	Unspecified	0.260525179407176	3193	0.25963044159098	80.6948541461816	Core	1.35572019757042	5.03065184543009	5.03065184543009	5.03065184543009	2.09750744799475	510.307644266058	394.066149960777	66.4020322193902	0.0464	0.0391061452513966
Chr1	4275516	4281854	6339	LTR/Gypsy	0.065717024452207	6292	0.304354736172918	93.830497694387	Core	1.63187884769021	5.03065184543009	5.03065184543009	5.03065184543009	460.119719674399	460.399476138962	394.160339599826	144.061232362185	0.071664167916042	0.0354609929078014
Chr6	2332882	2333389	508	LTR/Copia	0.130813825757576	506	0.274703557312253	92.3847695390782	Core	1.50336134453782	5.03065184543009	5.03065184543009	5.03065184543009	0	439.749475186971	394.171903079752	105.897631878061	0.0491803278688525	0.333333333333333
Chr6	1118852	1119674	823	DNA/Mite	0.0877351089588378	822	0.360097323600973	92.3170731707317	Core	1.3426724137931	5.9659378983135	6.74506927210126	5.98919710795581	0	237.308752244146	394.263695406685	263.968729595734	0.0565302144249513	0.00811359026369168
Chr6	1090095	1090371	277	Unspecified	0.351148387096774	276	0.536231884057971	73.3333333333333	Core	-1.15402298850575	5.03065184543009	5.10919404715617	5.87420815949683	0	0.637117349877187	394.269143725445	770.746497615612	0.00602409638554217	0.00326086956521739
Chr1	87383	89131	1749	Unspecified	0.0736898514285714	1748	0.231121281464531	93.0778032036613	Core	1.29609502741175	5.03065184543009	5.03065184543009	5.03065184543009	0	763.711144998033	394.406675347648	64.5250621866263	0.0309278350515464	0
Chr1	612637	616059	3423	LTR/Copia	0.0823453457834841	3412	0.189624853458382	92.6371369903197	Core	1.24647556390977	5.03065184543009	5.03065184543009	5.03065184543009	1113.59067740589	658.935034045007	394.706793631971	33.4150726954997	0.0275590551181102	0
Chr5	406650	406895	246	DNA/Mite	0.283138486055777	245	0.469387755102041	80.6034482758621	Core	-0.874680306905371	5.23050551921081	5.19040660395899	5.44774206346151	0	0.718062586951747	395.387411150923	738.531499257914	0.005	0.00256081946222791
Chr6	2303779	2303892	114	LTR/Gypsy	0.0702925	113	0.336283185840708	95.5752212389381	Core	1.54166666666667	5.03065184543009	5.03065184543009	5.03065184543009	0	880.729407988709	395.387411150923	131.125361377054	0	0
Chr8	1110578	1112485	1908	Unspecified	0.214837414330218	1907	0.24069218668065	83.829096809086	Core	1.1752052545156	5.13283576313994	5.03065184543009	5.03065184543009	0	841.932527318687	395.617903987084	86.4227729900666	0.012012012012012	0.0159574468085106
Chr6	3437404	3438041	638	Unspecified	0.116843629518072	637	0.252747252747253	92.4646781789639	Core	1.36677367576244	5.03065184543009	5.03065184543009	5.03065184543009	10.5271128522	425.621437152625	395.940014101518	104.222707767993	0.0393700787401575	0
Chr2	353554	357613	4060	LTR/Gypsy	0.068869276299428	4018	0.328521652563464	93.5258964143426	Core	1.53252794214333	5.03065184543009	5.11924851457382	5.03065184543009	0.824943786840714	393.11537812315	396.058623556907	239.540934299878	0.0580762250453721	0.0362239297475302
Chr8	1115249	1117342	2094	Unspecified	0.270517320261438	2093	0.25752508361204	80.5955334987593	Core	1.37735849056604	5.03065184543009	5.03065184543009	5.03065184543009	0	769.588726197851	397.067408648908	87.46659938272	0.0292573143285821	0.035
Chr5	2037892	2038057	166	LTR/Gypsy	0.100937724550898	165	0.290909090909091	91.5151515151515	Core	1.65	5.03065184543009	5.03065184543009	5.03065184543009	40.8246571585319	901.676444551799	397.530432349573	157.315858738457	0.0175438596491228	0
Chr6	3474429	3476055	1627	Unspecified	0.0740689066339066	1626	0.197416974169742	93.0504305043051	Core	1.25602177901403	5.03065184543009	5.03065184543009	5.03065184543009	243.088850871357	744.496127844949	397.847599486973	40.0583889858417	0.011070110701107	0
Chr1	571384	572807	1424	LTR/Copia	0.0890568701754386	1412	0.195467422096317	92.3512747875354	Core	1.1587044534413	5.03065184543009	5.03065184543009	5.03065184543009	4.70832895499243	624.684152648571	398.044335464017	30.7040797537786	0.0196078431372549	0
Chr8	470206	470413	208	Unspecified	0.164491466666667	207	0.565217391304348	91.747572815534	Core	-0.416666666666667	5.34449311828065	5.47965457634083	5.10471848180467	0	0.850520734059351	398.373076607294	747.596917344695	0.003690036900369	0.00258064516129032
Chr8	3300860	3301051	192	Unspecified	0.166546394230769	191	0.570680628272251	93.048128342246	Core	0.0888888888888888	5.70810511310171	5.03065184543009	5.10018468709118	0	0.922143532716981	398.624501066778	937.98466186761	0.00324149108589951	0.00388098318240621
Chr5	1539686	1543810	4125	Unspecified	0.0899419634263715	4124	0.265518913676043	92.2330097087379	Core	1.27322811839454	5.03065184543009	5.19040660395899	5.09975004453444	1.62387673393142	491.965699459193	399.617578025823	104.45263495185	0.0649436713055003	0.0376984126984127
Chr2	3813285	3813922	638	Unspecified	0.111369323308271	637	0.23861852433281	93.2389937106918	Core	1.28160200250313	5.03065184543009	5.03065184543009	5.03065184543009	5.26355642610002	545.732082200227	400.36083770628	41.1898126508237	0.0410958904109589	0
Chr3	140203	147686	7484	LTR/Copia	0.0880809973404255	7473	0.237120299745751	92.2232632847008	Core	1.30138118600683	5.03065184543009	5.03065184543009	5.03065184543009	64.4289697578114	680.737152399853	400.589722569137	51.1932387554708	0.0314799672935405	0.0221518987341772
Chr3	227478	234954	7477	LTR/Copia	0.0816471158455393	7466	0.210286632735066	92.8523534933619	Core	1.24196950903888	5.03065184543009	5.03065184543009	5.09975004453444	647.580100147351	564.038498267193	400.635734572071	45.5595145146503	0.0283964365256125	0.0316742081447964
Chr1	995320	995428	109	Unspecified	0.220499576271186	108	0.537037037037037	88.5714285714286	Core	-1.13095238095238	5.03065184543009	5.03065184543009	5.03065184543009	0	1.63745113286193	400.724935912046	745.616098843204	0.00512820512820513	0
Chr2	3787150	3787800	651	Unspecified	0.160949852941176	650	0.190769230769231	89.3023255813954	Core	1.14332514332514	5.03065184543009	5.03065184543009	5.03065184543009	15.474369277348	291.832142041203	400.735058040312	35.4720504520611	0	0
Chr1	3093335	3093503	169	Unspecified	0.186940173410405	168	0.273809523809524	89.3081761006289	Core	1.47619047619048	5.03065184543009	5.03065184543009	5.03065184543009	0	424.903861332764	400.911786157023	90.3171286649527	0	0
Chr5	3421242	3421877	636	Unspecified	0.145891478129713	635	0.21259842519685	89.9212598425197	Core	1.24929709465792	5.03065184543009	5.03065184543009	5.03065184543009	5.28016070504671	585.866585139432	401.346632559787	45.7021465861879	0.0520833333333333	0.05
Chr8	2920605	2922933	2329	LTR/Copia	0.0519961867364747	2278	0.172519754170325	95.5223880597015	Core	1.18410852713178	5.03065184543009	5.03065184543009	5.03065184543009	1.43859986549188	242.971149211329	401.372122478566	20.6391583802581	0.0273972602739726	0
Chr1	9187505	9190202	2698	LTR/Copia	0.0928035908921239	2697	0.217649239896181	91.8766453553968	Core	1.30995475113122	5.03065184543009	5.03065184543009	5.03065184543009	0	211.470497232048	401.970683245588	123.374989147133	0.0538922155688623	0
Chr6	3457618	3458091	474	LTR/Gypsy	0.365673217922607	473	0.25369978858351	73.8562091503268	Core	1.32235294117647	5.03065184543009	5.03065184543009	5.03065184543009	0	633.270348929835	402.088892695854	96.7072065126236	0.0409090909090909	0
Chr1	474513	474981	469	LTR/Gypsy	0.355373037974684	468	0.267094017094017	75.1141552511416	Core	1.23596995139196	5.03065184543009	5.03065184543009	5.03065184543009	0	571.76848251291	402.254715698631	118.991010266347	0.0258620689655172	0.0099009900990099
Chr4	2339249	2339894	646	Unspecified	0.111190830860534	645	0.29922480620155	93.4681181959564	Core	1.38722331185206	5.1295646765902	5.03065184543009	5.10018468709118	10.396341263974	313.686310112281	402.754878439449	105.393357440546	0.0417362270450751	0.0297029702970297
Chr4	3053012	3053153	142	Unspecified	0.0828381632653061	141	0.283687943262411	95.7446808510638	Core	1.25714285714286	5.03065184543009	5.03065184543009	5.03065184543009	0	2688.18013266039	402.91859993475	172.943719870277	0.0185185185185185	0
Chr3	1764268	1764570	303	LTR/Gypsy	0.286158139534884	247	0.510121457489879	80	Core	-0.385185185185185	6.42852875536457	6.16714094898694	6.10075934452482	11.1216673986698	33.1787855791525	403.414841056165	561.753905182905	0.0184804928131417	0.00680272108843537
Chr3	2771359	2771545	187	LTR/Gypsy	0.326844836956522	186	0.311827956989247	78.7878787878788	Core	1.64166666666667	5.03065184543009	5.03065184543009	5.21966174099868	0	322.949618836396	403.698858232173	229.569953359038	0.0628930817610063	0.102564102564103
Chr8	1120277	1123471	3195	Unspecified	0.26564215980025	3194	0.283656856606136	80.466951660638	Core	1.42670722135008	5.03065184543009	5.03065184543009	5.03065184543009	2.09685053993086	717.071287270168	403.73901913257	99.571854139192	0.0224249334853668	0.0248565965583174
Chr6	3179710	3179979	270	LTR/Copia	0.181599855072464	269	0.442379182156134	85.8208955223881	Core	0.0284090909090908	5.83382906357091	5.52839586839671	5.714215655676	0	240.583118684967	403.911517858986	484.301657429733	0.0103626943005181	0.0156657963446475
Chr2	3627353	3633889	6537	LTR/Copia	0.0918800266889074	5989	0.185339789614293	92.0733759676876	Core	1.19665365586853	5.13283576313994	5.03065184543009	5.03065184543009	804.761129988737	525.836298448944	404.106572457779	29.9436214718891	0.0157894736842105	0.0344827586206897
Chr7	3100336	3101635	1300	Unspecified	0.265791127063891	1299	0.247113163972286	83.1487341772152	Core	1.38057784911717	5.03065184543009	5.03065184543009	5.03065184543009	0	1059.47755914958	404.119644679166	76.4483845949593	0.0377867746288799	0.0288461538461538
Chr1	618772	619416	645	Unspecified	0.102175833333333	644	0.301242236024845	93.944099378882	Core	1.30194805194805	5.03065184543009	5.03065184543009	5.03065184543009	2358.43346004794	910.641835777027	404.47442094582	85.1865657367807	0.0151228733459357	0.0408163265306122
Chr6	3144166	3144374	209	Unspecified	0.1684416	208	0.576923076923077	92.156862745098	Core	-0.291666666666667	5.03065184543009	5.11924851457382	5.87053922861506	0	0	404.937831710124	1014.35114386574	0	0.00256739409499358
Chr1	8194091	8194814	724	Unspecified	0.111338888888889	723	0.307053941908714	93.4812760055479	Core	1.30557834290402	5.1295646765902	5.03065184543009	5.10018468709118	0	84.2062646981032	405.244715030032	164.375462371595	0.0357894736842105	0
Chr5	3260228	3260970	743	DNA/Mite	0.0917838791946309	742	0.338274932614555	92.0162381596752	Core	1.47612732095491	5.13159268805071	5.34902897245022	5.22494449209055	1246.88750446949	166.222282948728	405.288400453997	286.575177944818	0.0419790104947526	0.00229357798165138
Chr4	3349257	3349928	672	LTR/Copia	0.243895049833887	634	0.49211356466877	85.451197053407	Core	0.19249530956848	6.18489573643055	5.90958981387863	6.81571148329804	0	415.267383121444	405.485199097397	411.138043126892	0.0250681198910082	0.00998003992015968
Chr1	7239335	7240102	768	Unspecified	0.295207303070761	767	0.213820078226858	78.8051209103841	Core	1.34	5.03065184543009	5.03065184543009	5.03065184543009	8.74052712010344	298.492805401012	405.596137461463	22.799582981657	0	0
Chr8	1406783	1406941	159	LTR/Gypsy	0.098560625	158	0.348101265822785	91.7721518987342	Core	0.763888888888889	5.03065184543009	5.03065184543009	5.03065184543009	0	836.977410268597	406.300439484175	154.217329820629	0.00675675675675676	0.0638297872340426
Chr1	3741307	3742082	776	Unspecified	0.289506432432432	775	0.224516129032258	79.3650793650794	Core	1.37755102040816	5.03065184543009	5.03065184543009	5.03065184543009	0	359.242815788309	406.625813018262	29.7433601335758	0.0729166666666667	0
Chr2	3640216	3640852	637	Unspecified	0.148481536144578	636	0.212264150943396	90.0473933649289	Core	1.27166350411132	5.03065184543009	5.03065184543009	5.03065184543009	0	592.117801622081	406.802795724834	38.1293240658878	0.0659340659340659	0.107142857142857
Chr1	76190	76498	309	Unspecified	0.372278058252427	308	0.155844155844156	70.7792207792208	Core	1.01864406779661	5.03065184543009	5.03065184543009	5.03065184543009	0	1290.3701635827	406.978573041341	40.0798710010681	0.0425531914893617	0
Chr6	2810641	2817394	6754	LTR/Copia	0.0900203167420815	4823	0.246734397677794	92.258198422582	Core	1.22957677165354	5.23144263567564	5.31250695748704	5.13529487615267	80.8149241085512	275.759429978501	407.151175621711	174.181575529748	0.0223761321257326	0.0129589632829374
Chr6	1026121	1026317	197	DNA/Mite	0.220946666666667	196	0.275510204081633	85.1648351648352	Core	1.33399209486166	5.03065184543009	5.03065184543009	5.03065184543009	0	26.0564659757465	407.327885675708	1152.08578079199	0	0.0540540540540541
Chr8	798927	801781	2855	LTR/Copia	0.0896169435215947	2377	0.195624737063525	92.7908937605396	Core	1.15202963420281	5.03065184543009	5.03065184543009	5.10018468709118	147.844499741308	394.93794643938	408.491538848451	121.872390896501	0.0386643233743409	0.0294117647058824
Chr5	52142	56511	4370	LTR/Copia	0.0971916803911477	3847	0.274759552898362	91.7772573510278	Core	1.19373776908023	5.5669421141478	5.41982502674612	5.81552087297006	1033.86948845295	185.917056338647	408.542853097031	223.630987074796	0.0420307948397836	0.0185873605947955
Chr4	982031	986774	4744	Unspecified	0.0378893411913281	4743	0.5460678895214	96.4986289812276	Core	-0.671729242155578	7.79341293275058	6.71214671364312	6.69803217087629	544.288586013645	86.8277282492897	408.783779221691	745.710753729842	0.00384451089278086	0.00340136054421769
Chr6	2607970	2608115	146	Unspecified	0.330901455696203	145	0.544827586206897	78.7234042553192	Core	-0.904761904761905	5.03065184543009	5.19040660395899	5.10018468709118	0	278.628229920249	408.8110578258	758.006968921409	0.00233644859813084	0.00651890482398957
Chr7	937776	937974	199	Unspecified	0.2128533640553	198	0.55050505050505	87.8172588832487	Core	-0.0277777777777779	5.03065184543009	5.03065184543009	5.03065184543009	0	183.211664317475	409.436710024306	560.12062722403	0.00148148148148148	0.00127551020408163
Chr5	2850348	2850539	192	Unspecified	0.299086896551724	191	0.528795811518325	80.4347826086957	Core	-0.25	5.68752763874456	6.20765755978884	5.85642048681495	0	130.944381645811	409.723095063997	428.255803302584	0	0.0032258064516129
Chr6	750882	751144	263	LTR/Copia	0.309663146067416	262	0.480916030534351	76.0617760617761	Core	-0.8	6.3946902815227	7.25119136529967	5.96027805896188	0	19.4674745795807	410.031389341697	535.309749086568	0.00806451612903226	0.00599700149925038
Chr6	423920	429059	5140	LTR/Copia	0.0498216062992126	5046	0.20332936979786	95.8168120539255	Core	1.33903359649628	5.03065184543009	5.03065184543009	5.03065184543009	337.49866435691	323.714018228034	411.445054811262	42.8747775619796	0.0411392405063291	0.0862068965517241
Chr2	671589	671998	410	LTR/Copia	0.1952	409	0.322738386308068	86	Core	1.44838455476753	5.03065184543009	5.03065184543009	5.03065184543009	0	605.495716703135	411.754210305318	163.437652336424	0	0.0232558139534884
Chr2	3787973	3788259	287	Unspecified	0.135269466666667	286	0.230769230769231	91.2587412587413	Core	1.34782608695652	5.03065184543009	5.03065184543009	5.03065184543009	0	209.019200749182	411.881155007901	45.9591593788139	0.037037037037037	0
Chr3	2953772	2953959	188	Unspecified	0.197235365853659	187	0.572192513368984	89.7297297297297	Core	1.13636363636364	5.03065184543009	5.03065184543009	5.03065184543009	17.9979671344065	0	411.920934914701	657.265397567983	0.00661157024793388	0.00391134289439374
Chr2	1481008	1481232	225	Unspecified	0.215844549356223	224	0.459821428571429	84.2342342342342	Core	0.0416666666666667	5.03065184543009	5.03065184543009	5.03065184543009	0	478.480843814717	412.132767378042	925.553393115942	0.0345911949685535	0.0149253731343284
Chr8	1009033	1018887	9855	LTR/Gypsy	0.0948885626137973	9854	0.266693728435153	91.5183565544595	Core	1.35908174898718	5.03065184543009	5.03065184543009	5.03065184543009	1627.09440950382	717.811013618736	412.611511755093	96.8028814370568	0.0203452527743527	0.018539976825029
Chr6	3093572	3093980	409	Unspecified	0.131867089201878	408	0.21078431372549	91.4004914004914	Core	1.25373134328358	5.13159268805071	5.25632077427365	5.12890085383927	0	473.963650145123	414.06118186594	79.9691426314407	0	0
Chr8	1078474	1079112	639	Unspecified	0.110348235294118	638	0.230407523510972	93.0817610062893	Core	1.19897959183673	5.03065184543009	5.03065184543009	5.03065184543009	5.25529338618464	649.669661872412	414.353316971	41.7482588049308	0	0
Chr4	3019563	3019711	149	LTR/Copia	0.197073374233129	148	0.405405405405405	89.7959183673469	Core	2.9	5.03065184543009	5.03065184543009	5.03065184543009	0	3203.79010223957	414.813096506032	191.709666054483	0	0.125
Chr6	3503232	3504534	1303	Unspecified	0.304956501182033	1302	0.313364055299539	80.9734513274336	Core	1.46546345811052	5.03065184543009	5.03065184543009	5.03065184543009	2.57311444043014	763.4512071674	415.344193112678	133.018543880265	0.0357388316151203	0.0223048327137546
Chr2	3641423	3642083	661	Unspecified	0.132244525547445	660	0.213636363636364	91.2977099236641	Core	1.30392156862745	5.03065184543009	5.03065184543009	5.03065184543009	5.07985111836057	526.68528722207	415.453438929784	43.9683777475616	0.03125	0
Chr1	3737416	3742495	5080	LTR/Copia	0.0559797158514309	4894	0.207805476093175	95.2176578786021	Core	1.31560134566863	5.03065184543009	5.03065184543009	5.03065184543009	191.83890687611	392.370438808768	415.752864869562	30.8750305361809	0.0526315789473684	0.0138888888888889
Chr6	2185067	2185278	212	LTR/Gypsy	0.12617801843318	211	0.322274881516588	90.521327014218	Core	1.52	5.03065184543009	5.03065184543009	5.03065184543009	0	1718.69989859727	415.888980618008	119.076003845109	0.00826446280991736	0
Chr8	2913813	2914448	636	Unspecified	0.126801266968326	635	0.222047244094488	91.7981072555205	Core	1.18347338935574	5.03065184543009	5.03065184543009	5.03065184543009	21.1206428201869	629.253874699286	416.036806265359	50.0845442040415	0.0261437908496732	0
Chr6	3458252	3462834	4583	LTR/Copia	0.082339982555604	4572	0.200787401574803	92.4540682414698	Core	1.225097483162	5.03065184543009	5.03065184543009	5.03065184543009	2.19228676293361	661.970628729632	416.245729792007	93.8363619036984	0.0200845665961945	0.00862068965517241
Chr7	3054240	3054879	640	Unspecified	0.166401588502269	639	0.264475743348983	87.8740157480315	Core	0.937569676700111	5.03065184543009	5.336200348951	5.09975004453444	5.2470562492157	346.569868769401	416.45821362605	141.846023389158	0.0506329113924051	0.075
Chr5	1574245	1581789	7545	LTR/Copia	0.0779075102635413	7534	0.210114149190337	93.2470305618577	Core	1.21831370599844	5.03065184543009	5.19250503960066	5.16928288619553	38.6110439041451	309.115519732936	416.476836457351	41.7284330059531	0.0310288513881328	0.0183823529411765
Chr4	3425872	3426054	183	Unspecified	0.151465925925926	182	0.494505494505495	89.010989010989	Core	-0.348214285714286	5.03065184543009	5.11186440223292	5.03065184543009	0	0.967995973570311	416.503865890106	1085.49948256591	0.00201207243460765	0.00657894736842105
Chr3	130366	130999	634	Unspecified	0.110874772727273	633	0.309636650868878	93.0489731437599	Core	1.29654403567447	5.03065184543009	5.03065184543009	5.03065184543009	5.29687007436648	457.14681999297	416.797277999461	109.906649118639	0.0344827586206897	0.00757575757575758
Chr5	3906665	3906835	171	Unspecified	0.211738609625668	170	0.535294117647059	88.6904761904762	Core	-0.807692307692308	5.1295646765902	5.31141375903306	5.2740004301771	0	85.0118120694116	416.963450023721	892.482869056041	0.00195694716242661	0.00628930817610063
Chr5	2013970	2014250	281	LTR/Gypsy	0.203967567567568	280	0.339285714285714	85.7142857142857	Core	1.25882352941176	5.03065184543009	5.03065184543009	5.03065184543009	0	405.677050916424	417.58957163371	359.931051049134	0.0424028268551237	0.0512820512820513
Chr3	135657	136321	665	Unspecified	0.233047101449275	664	0.161144578313253	83.5384615384615	Core	1.04643765903308	5.03065184543009	5.03065184543009	5.03065184543009	5.04920344947152	515.051239216327	417.717821333235	27.5389450823278	0.019047619047619	0
Chr3	239945	247460	7516	LTR/Copia	0.0811912567871805	7504	0.203891257995736	92.879050540072	Core	1.2281741846707	5.03065184543009	5.03065184543009	5.03065184543009	538.18568532014	614.764400534443	417.873732732658	132.324278960162	0.0242047026279391	0.0297029702970297
Chr7	3081830	3082537	708	Unspecified	0.28469262295082	707	0.302687411598303	81.044776119403	Core	1.25723595936362	5.03065184543009	5.03065184543009	5.03065184543009	0	771.060894715036	417.913417263078	127.05938087344	0.0353200883002207	0.0114942528735632
Chr7	3042381	3042580	200	Unspecified	0.304164516129032	199	0.562814070351759	80.5128205128205	Core	-0.383838383838384	5.44838837078123	5.85346085504553	5.85080983169971	16.9071812474728	122.999043934624	418.019013809393	813.886490927847	0.00154320987654321	0.0024390243902439
Chr5	2186080	2186553	474	LTR/Gypsy	0.352050521042084	473	0.264270613107822	75.1619870410367	Core	1.29279279279279	5.03065184543009	5.03065184543009	5.03065184543009	14.1848385042357	783.607096477656	418.097987497633	123.617037890049	0.022140221402214	0
Chr7	480571	480748	178	Unspecified	0.154856516853933	177	0.502824858757062	88.8888888888889	Core	-0.360576923076923	5.03065184543009	5.03065184543009	5.10471848180467	0	248.873964795776	418.351831495547	1120.847990739	0.00336700336700337	0.0032051282051282
Chr1	588851	589440	590	Unspecified	0.128329830795262	589	0.168081494057725	88.4550084889644	Core	1.16666666666667	5.03065184543009	5.03065184543009	5.03065184543009	0	643.618547324913	418.399376879283	22.9511572037058	0.0169491525423729	0
Chr5	3742141	3742381	241	Unspecified	0.397348888888889	240	0.579166666666667	75.7763975155279	Core	-0.403162055335968	5.03065184543009	5.03065184543009	5.03065184543009	0	466.241943487531	419.099626882428	586.245876671176	0.00672834314550042	0.00493218249075216
Chr4	3497201	3497363	163	Unspecified	0.229439608938547	162	0.537037037037037	86.9565217391304	Core	0.5	5.03065184543009	5.10919404715617	5.03065184543009	0	136.03049007471	420.218504604845	712.483749715039	0.00496277915632754	0.00247831474597274
Chr7	2100185	2100301	117	DNA/Mite	0.139539032258065	116	0.422413793103448	93.859649122807	Core	0.173611111111111	5.98556777006365	6.07109543012996	5.22494449209055	0	223.960598859002	420.218504604845	597.105758411704	0	0.00478468899521531
Chr1	4460316	4461789	1474	Unspecified	0.0866253731343284	1473	0.224032586558045	92.0408163265306	Core	1.37560252131999	5.03065184543009	5.03065184543009	5.03065184543009	0	465.989447562178	420.218504604845	59.8615780199595	0.0388349514563107	0
Chr8	1067733	1068140	408	Unspecified	0.220365492957746	407	0.181818181818182	86.0050890585242	Core	1.2318407960199	5.03065184543009	5.03065184543009	5.03065184543009	0	737.510410119534	420.27496029288	61.5910364716079	0.0689655172413793	0
Chr3	1754835	1755201	367	Unspecified	0.1065978125	366	0.26775956284153	93.9890710382514	Core	1.45652173913043	5.03065184543009	5.03065184543009	5.03065184543009	0	757.471435559466	420.302234319337	114.182469440515	0.0625	0
Chr8	2703089	2703291	203	Unspecified	0.208234	202	0.584158415841584	88.8888888888889	Core	0.536231884057971	5.430575047278	5.98170515451112	5.03065184543009	0	0	420.522597597775	1001.18630098624	0	0.00223463687150838
Chr5	3789205	3790028	824	DNA/Mite	0.099348703030303	823	0.3681652490887	90.8869987849332	Core	1.56367243867244	5.13159268805071	5.10919404715617	5.43310897069804	0	168.81284525943	420.934205220961	380.502396715108	0.0446533490011751	0.0289855072463768
Chr5	2144650	2145284	635	Unspecified	0.105113303167421	634	0.318611987381703	93.8485804416404	Core	1.28205128205128	5.03065184543009	5.03065184543009	5.03065184543009	0	355.67352845632	421.1358277802	158.015550126211	0.0387722132471729	0.0808823529411765
Chr8	1136628	1137263	636	Unspecified	0.103901812688822	635	0.267716535433071	93.7007874015748	Core	1.28333333333333	5.03065184543009	5.03065184543009	5.03065184543009	5.28016070504671	453.493899157456	421.303094952262	79.5092139239159	0.0330578512396694	0
Chr8	1138484	1139081	598	Unspecified	0.159089554140127	597	0.254606365159129	89.4295302013423	Core	1.3742816091954	5.03065184543009	5.03065184543009	5.03065184543009	0	366.87697060042	421.333788616457	101.893895907727	0.0169491525423729	0
Chr1	4258866	4261472	2607	Unspecified	0.0854397092578424	2606	0.296623177283193	92.2072936660269	Core	1.59661867652886	5.03065184543009	5.03065184543009	5.03065184543009	5.14030232168847	474.16939043163	421.3418247044	146.730891494357	0.0519584332533973	0.0150943396226415
Chr2	3641170	3645759	4590	LTR/Copia	0.0969606645978795	3833	0.23949908687712	92.1239170385928	Core	1.27961282903143	5.27532803997757	5.34343122451878	5.39477931325187	1.45929463251945	467.728565356656	421.432498778805	76.9962535761019	0.0297142857142857	0.0108695652173913
Chr1	7198031	7199153	1123	Unspecified	0.256070008764242	1122	0.186274509803922	81.5985130111524	Core	1.1734693877551	5.03065184543009	5.03065184543009	5.03065184543009	0	914.328757015989	421.683867973429	33.2832124931318	0.0267857142857143	0
Chr5	2355686	2356327	642	Unspecified	0.121129505988024	641	0.338533541341654	92.0436817472699	Core	1.17753047164812	5.03065184543009	5.03065184543009	5.03065184543009	5.2306591984369	776.113459215628	422.021146485394	120.316378885162	0.0256	0.0121212121212121
Chr1	550070	550459	390	LTR/Copia	0.104193170731707	388	0.265463917525773	94.8453608247423	Core	1.47138047138047	5.03065184543009	5.03065184543009	5.03065184543009	0	1787.29479245831	422.108897127904	78.7702087291526	0	0
Chr3	160965	163527	2563	Unspecified	0.244538275340393	2562	0.190085870413739	82.2683706070288	Core	1.1873353428429	5.03065184543009	5.03065184543009	5.03065184543009	1959.42413456167	309.366372682458	422.268059911107	28.8274589550829	0.0277324632952692	0.0144927536231884
Chr1	7106895	7108902	2008	Unspecified	0.23275377898372	2007	0.216741405082212	82.8586224754013	Core	1.25356502766306	5.03065184543009	5.03065184543009	5.03065184543009	3.33760905982016	700.74174325413	422.324738929566	289.082820900139	0.0291005291005291	0.00709219858156028
Chr4	840303	843199	2897	LTR/Copia	0.0994804550155119	2886	0.206167706167706	91.0949410949411	Core	1.13315523059618	5.03065184543009	5.03065184543009	5.03065184543009	1.15634607495669	233.125529784077	422.59637788259	45.5189790173587	0.0208092485549133	0.00980392156862745
Chr1	7181654	7183195	1542	LTR/Copia	0.114239973333333	1485	0.204713804713805	90.2291105121294	Core	1.23755274261603	5.03065184543009	5.03065184543009	5.03065184543009	2.17378044610365	998.226362111149	422.887661103988	28.3514294869306	0.0333333333333333	0.0166666666666667
Chr2	3794985	3796699	1715	LTR/Copia	0.127897081005587	731	0.162790697674419	89.6159317211949	Core	1.26666666666667	5.03065184543009	5.03065184543009	5.03065184543009	3.9084902358431	572.568770734638	422.957072368231	141.343378761464	0	0
Chr3	147693	147927	235	Unspecified	0.13045649122807	234	0.260683760683761	89.6860986547085	Core	1.19918699186992	5.03065184543009	5.03065184543009	5.03065184543009	0	1036.95633908659	423.104125237325	107.321720203746	0	0
Chr8	1139166	1139792	627	Unspecified	0.116227400611621	626	0.277955271565495	93.2475884244373	Core	1.31829644158027	5.03065184543009	5.03065184543009	5.03065184543009	0	617.8509212169	423.152393800632	139.080772491087	0.0204081632653061	0
Chr5	2202075	2203379	1305	LTR/Copia	0.044576783625731	1014	0.199211045364892	96.7455621301775	Core	1.32683229813665	5.03065184543009	5.03065184543009	5.03065184543009	0	438.757732907557	423.877422443029	106.617041048319	0.0176991150442478	0
Chr6	420251	433135	12885	LTR/Copia	0.104086996466431	4522	0.243918620079611	90.5585106382979	Core	1.24641943880652	5.17029132765031	5.24760367980728	5.35457228846086	155.908804797001	325.975555676607	425.085712648274	101.610044420598	0.0263488080301129	0.00932835820895522
Chr5	3481472	3482160	689	DNA/Tc1-Mariner	0.281717611510791	688	0.526162790697674	77.8434268833087	Core	-0.0518579011841569	7.21615195990592	6.46546448987092	6.01436054371685	4.87281206259042	102.778064483463	425.123000053588	497.449972395141	0.0019672131147541	0.00201045436268597
Chr1	669385	669708	324	Unspecified	0.151192529761905	323	0.210526315789474	89.1640866873065	Core	1.12820512820513	5.03065184543009	5.03065184543009	5.03065184543009	10.396341263974	1762.95515136824	425.130149463863	39.4454671122513	0.0138888888888889	0
Chr3	960110	960254	145	Unspecified	0.287643133333333	144	0.527777777777778	82.7067669172932	Core	-0.0888888888888888	5.70430387611318	5.47485157028449	5.17425132346575	0	199.711784673041	425.18739474194	852.12897856523	0.00240963855421687	0.00726392251815981
Chr8	1950351	1950616	266	LTR/Copia	0.305525333333333	265	0.456603773584906	76.3358778625954	Core	-0.425	6.02487856997219	6.33319838623024	5.61971745975572	12.6803859356046	1.32732781224414	425.34100290478	324.752737759387	0.0201612903225806	0.0211640211640212
Chr8	1895396	1895884	489	Unspecified	0.223053839835729	488	0.383196721311475	85.2097130242826	Core	1.26146572104019	5.03065184543009	5.03065184543009	5.03065184543009	0	584.983620118242	425.427111792779	261.62489551184	0.0710382513661202	0.02
Chr3	2764905	2765378	474	LTR/Gypsy	0.354282909090909	473	0.295983086680761	74.1452991452991	Core	1.43240093240093	5.03065184543009	5.03065184543009	5.03065184543009	7.09241925211783	716.79076423418	425.544078103112	104.275596587525	0.0488721804511278	0.0136986301369863
Chr3	214383	214625	243	LTR/Copia	0.315080775510204	242	0.392561983471074	77.9735682819383	Core	0.107142857142857	5.37341608798077	5.11186440223292	5.3676745878781	0	687.743064608092	425.829872037139	380.450302741633	0.00589970501474926	0.00236406619385343
Chr1	7180491	7181654	1164	LTR/Copia	0.0840868610634648	1153	0.210754553339115	92.9748482220295	Core	1.33862433862434	5.03065184543009	5.03065184543009	5.03065184543009	0	1033.30071398003	425.859992274239	37.9157671451723	0.03125	0.0952380952380952
Chr2	3649080	3649716	637	Unspecified	0.16375457957958	636	0.176100628930818	88.6614173228347	Core	1.03429203539823	5.03065184543009	5.03065184543009	5.03065184543009	0	333.583607717193	426.174357426016	35.0039696342577	0	0
Chr8	3346338	3346557	220	Unspecified	0.18882485106383	219	0.575342465753425	90.5660377358491	Core	-0.160869565217391	5.76112996540271	5.2811073641916	6.23045849947283	0	3.21481231589406	426.421897041464	897.621863847684	0.00404040404040404	0
Chr6	1754639	1754771	133	Unspecified	0.0680702222222222	132	0.492424242424242	95.4545454545455	Core	0.275	5.17029132765031	5.45267021816784	5.10018468709118	0	1.33746008562005	426.575731114481	736.271474156779	0.00550964187327824	0.00359712230215827
Chr2	599336	599533	198	LTR/Gypsy	0.0729417587939699	197	0.299492385786802	93.9086294416244	Core	1.53177257525084	5.03065184543009	5.03065184543009	5.03065184543009	0	976.154796776118	426.767364416869	74.9287779297452	0.0078740157480315	0
Chr5	1906350	1906571	222	Unspecified	0.169190226244344	221	0.199095022624434	87.7358490566038	Core	1.09121621621622	5.03065184543009	5.03065184543009	5.03065184543009	0	1298.92299706211	427.337909021704	160.572187003253	0	0
Chr4	3368584	3373684	5101	LTR/Copia	0.0500620758086922	5007	0.199920111843419	95.7451058729525	Core	1.25963020030817	5.03065184543009	5.03065184543009	5.03065184543009	2.6261007154341	295.264969908028	427.584634037131	35.1070652638713	0.0587349397590361	0.0427350427350427
Chr8	2908339	2908978	640	Unspecified	0.112703603603604	639	0.2660406885759	93.2389937106918	Core	1.31578947368421	5.03065184543009	5.03065184543009	5.03065184543009	0	613.500068804153	428.026497337885	90.209093822052	0.0161290322580645	0
Chr4	3264955	3265112	158	Unspecified	0.229503448275862	157	0.643312101910828	87.1794871794872	Core	-1.125	5.03065184543009	5.03065184543009	5.03065184543009	21.4591146602539	2.2462470668747	428.054747114959	740.40848544715	0.00537634408602151	0.00141643059490085
Chr8	1523497	1523885	389	LTR/Copia	0.113605896805897	388	0.404639175257732	93.298969072165	Core	1.73010752688172	5.20485363606043	5.37272236391418	5.37945506878573	0	1580.03456471481	429.102616752939	265.638974986074	0.0230414746543779	0.0136986301369863
Chr5	2367652	2368049	398	LTR/Gypsy	0.170173406326034	397	0.314861460957179	87.1536523929471	Core	1.54117647058824	5.03065184543009	5.03065184543009	5.19799905294362	0	604.819039779246	429.112936681192	304.706272465598	0.0534223706176962	0.0115606936416185
Chr7	3101896	3102531	636	Unspecified	0.0985724886877828	635	0.267716535433071	94.4794952681388	Core	1.29254529254529	5.03065184543009	5.03065184543009	5.03065184543009	10.5603214100934	1278.95780944589	429.895460704578	103.299372420836	0.0150375939849624	0.0178571428571429
Chr5	2383328	2383746	419	Unspecified	0.284393187066975	418	0.284688995215311	81.2658227848101	Core	1.38551724137931	5.03065184543009	5.03065184543009	5.03065184543009	8.02787023261299	784.441187915335	430.680452114301	124.691898510865	0.0819672131147541	0.04
Chr3	1747697	1748073	377	LTR/Gypsy	0.107179047619048	376	0.265957446808511	90.4255319148936	Core	1.49023569023569	5.03065184543009	5.03065184543009	5.03065184543009	0	1009.66110159537	431.118717936413	133.365124306522	0.0235294117647059	0
Chr1	7100543	7101845	1303	Unspecified	0.268069631236443	1302	0.235023041474654	83.4538152610442	Core	1.36302218218669	5.03065184543009	5.03065184543009	5.03065184543009	0	529.123265648388	431.28260442562	58.8820618552549	0.0104947526236882	0
Chr1	3752335	3752969	635	Unspecified	0.11873009009009	634	0.294952681388013	93.1962025316456	Core	1.37979094076655	5.03065184543009	5.03065184543009	5.03065184543009	0	964.608752272589	431.407433335814	70.2291333894269	0.0404494382022472	0.0365853658536585
Chr4	843199	850026	6828	LTR/Gypsy	0.392615883392226	6827	0.188076754064743	69.886702444842	Core	1.20024520684043	5.03065184543009	5.03065184543009	5.03065184543009	37.7625088337197	424.337328998924	432.111058773203	30.9348735450717	0.0381263616557734	0.028
Chr2	352419	353243	825	Unspecified	0.0812569230769231	824	0.344660194174757	93.30900243309	Core	1.97530864197531	5.03065184543009	5.03065184543009	5.03065184543009	0	617.376775853045	432.166394043185	258.022122548129	0.0748847926267281	0.0476190476190476
Chr6	3513035	3518141	5107	LTR/Copia	0.0699372422680412	5010	0.178642714570858	93.986013986014	Core	1.22167583192329	5.03065184543009	5.03065184543009	5.03065184543009	0.655753552791306	518.071255437598	432.452022747985	26.3576658854011	0.0283687943262411	0.03125
Chr3	247978	248615	638	Unspecified	0.132479019607843	637	0.240188383045526	90.894819466248	Core	1.24420677361854	5.03065184543009	5.03065184543009	5.03065184543009	494.774304053402	968.047721782735	432.688110316104	61.1606309057686	0.0138888888888889	0
Chr8	1008778	1009033	256	Unspecified	0.120829773584906	255	0.258823529411765	92.4901185770751	Core	1.36111111111111	5.03065184543009	5.03065184543009	5.03065184543009	0	1060.21092858008	433.092772319296	150.017012718247	0.0424242424242424	0
Chr5	3726090	3730972	4883	LTR/Copia	0.0527390314465409	4738	0.187842971718024	95.5245936246569	Core	1.29573934837093	5.03065184543009	5.03065184543009	5.03065184543009	294.914446099126	499.274315784981	433.972988596437	33.7475528209521	0.0279441117764471	0.0256410256410256
Chr5	2347757	2350360	2604	Unspecified	0.0822725652841782	2603	0.240491740299654	92.2397233960814	Core	1.39659101266977	5.03065184543009	5.03065184543009	5.03065184543009	680.588769493773	468.790554268781	434.119101354194	70.6279653859663	0.0438957475994513	0.0454545454545455
Chr3	214637	218432	3796	LTR/Copia	0.093096829015544	1924	0.179313929313929	92.0460491889063	Core	1.13267813267813	5.03065184543009	5.03065184543009	5.03065184543009	142.057755352382	319.981861427842	434.40971465876	196.05379652586	0.00754716981132076	0.0185185185185185
Chr3	2419626	2419823	198	LTR/Gypsy	0.0951463316582914	197	0.33502538071066	91.8781725888325	Core	1.33333333333333	5.03065184543009	5.03065184543009	5.03065184543009	0	1447.24781683199	434.836495256684	222.761231683026	0.00632911392405063	0
Chr3	128615	129558	944	LTR/Copia	0.0756191428571429	933	0.2497320471597	93.8906752411576	Core	1.39239028944911	5.03065184543009	5.03065184543009	5.03065184543009	0	292.38410865383	434.842205894221	78.7941002089006	0.0267857142857143	0
Chr6	3505294	3507739	2446	LTR/Copia	0.100494736411933	2422	0.193228736581338	91.4120561519405	Core	1.15768511093291	5.03065184543009	5.03065184543009	5.03065184543009	1349.18476215001	622.329918751252	434.861440742095	255.464476334364	0.0181818181818182	0.04
Chr1	7726874	7731761	4888	LTR/Copia	0.0884352531256405	4841	0.278661433588102	92.3140495867769	Core	1.35577073246916	5.76189135548508	6.13999803381427	6.56019304249142	0	287.840516998086	435.363133850177	113.568190323006	0.0479859894921191	0.0250569476082005
Chr2	4110804	4111022	219	Unspecified	0.174109471365639	218	0.435779816513761	87.5576036866359	Core	0.92156862745098	5.03065184543009	5.03065184543009	5.03065184543009	0	179.244305115218	435.67522211817	748.111913558363	0.0174672489082969	0.00778210116731518
Chr3	3909812	3910043	232	DNA/Mite	0.23967194214876	231	0.476190476190476	83.2599118942731	Core	-0.697722567287785	5.40683693656421	5.20046107137664	5.03065184543009	35746.7798020481	325.276107866646	436.263211144303	1135.53638449393	0.00315457413249211	0.00215749730312837
Chr2	1381663	1381813	151	DNA/Mite	0.284961351351351	150	0.46	82.5757575757576	Core	-0.277777777777778	5.03065184543009	5.03065184543009	5.10018468709118	0	0	436.370893738528	799.167811040998	0.00829875518672199	0.00301204819277108
Chr3	168893	169537	645	LTR/Copia	0.141963856502242	643	0.237947122861586	90.7378335949765	Core	1.42310577644411	5.03065184543009	5.03065184543009	5.03065184543009	6434.93103006458	266.21695797551	436.449763682753	88.2730355098524	0.0454545454545455	0
Chr1	749021	749764	744	LTR/Gypsy	0.235129477806789	743	0.313593539703903	81.9783197831978	Core	1.42555348994423	5.03065184543009	5.03065184543009	5.21966174099868	0	273.436684728289	436.477387691614	193.110680090226	0.0520393811533052	0
[truncated: 674 more rows]
