# Supplementary material for: A unique chromatin profile defines adaptive genomic regions in a fungal plant pathogen
Source: eLife journal article supplement (doi:10.7554/elife.62208), 2020-12-18
Supplement: supp [file elife-62208-supp-v1.zip › elife_poa_e62208_Figure_4_source_data_1.txt]

seqnames	start	end	width	strand	TPM.M	TPM.K9	TPM.K27	TPM.atac	TPM.rna	mCG_lvl	TEden	pct_GC	LS.type	class	Is.LS	lg.k9	lg.rna	lg.mC
Chr1	50000	60000	10001	*	2.70732920426954	4908.62717004369	896.1476538659	38.0341765267016	0	0.0256	3	0.2552	0	Core	0	12.2613977571956	0	-2.99309163065782
Chr1	60000	70000	10001	*	758.438938510366	4918.59949136984	726.863687008288	41.7301103884932	0.0273388607224201	0.023	3	0.2532	0	Core	0	12.2643251540205	0.0389121232814827	-3.02326977932285
Chr1	70000	80000	10001	*	947.178460179442	2952.69470135064	694.130567875647	43.6535045410582	0	0.0259	5	0.2579	0	Core	0	11.528304999184	0	-2.98964981183043
Chr1	80000	90000	10001	*	35.9688022852953	2675.45372626229	669.912247323352	62.7177348179522	0.0273388607224201	0.0289	4	0.2885	0	Core	0	11.3861069944908	0.0389121232814827	-2.9556758311878
Chr1	90000	100000	10001	*	5.41465840853907	2100.97492232684	553.357217575996	98.6022355270813	35.3764857748116	0.0047	6	0.3463	0	Core	0	11.0375297419496	5.1849342700884	-3.25566665261864
Chr1	100000	110000	10001	*	1.93380657447824	478.305945910442	192.490282660604	228.638765684808	434.004413968419	0.0033	0	0.5223	0	Core	0	8.90480302683634	8.76488622976607	-3.27508784068439
Chr1	110000	120000	10001	*	0.386761314895648	272.541975510589	166.562023049141	256.886260199929	108.398582764396	0.0036	0	0.5304	0	Core	0	8.095618423942	6.77345023821578	-3.2709040918629
Chr1	120000	130000	10001	*	1.93380657447824	173.967406590284	184.847901967588	243.648782796982	1303.29816835921	0.0027	0	0.5367	0	Core	0	7.4509423876608	10.3490579984339	-3.28349191323125
Chr1	130000	140000	10001	*	0	180.963694850518	189.244888119734	272.518551890874	190.743231260325	0.0033	0	0.5379	0	Core	0	7.50750682435315	7.58303183973489	-3.27508784068439
Chr1	140000	150000	10001	*	6.96170366812166	99.7754243679571	175.530478930899	317.341178367805	99.7048250546661	0.0033	0	0.5359	0	Core	0	6.65500004820319	6.6539889983992	-3.27508784068439
Chr1	150000	160000	10001	*	652.466338228958	234.688923356341	158.884745640633	303.368285553583	26.9014389508614	0.0032	0	0.5407	0	Core	0	7.88074014779267	4.8022676224522	-3.2764851241262
Chr1	160000	170000	10001	*	895.739205298321	116.482978422246	101.444751938792	291.243359670256	177.620578113563	0.0029	0	0.5479	0	Core	0	6.87630793614202	7.48075448653964	-3.28068511265548
Chr1	170000	180000	10001	*	3.48085183406083	147.966275593297	154.592449634966	250.418375941794	99.8688582190006	0.0031	0	0.5358	0	Core	0	7.21884194635965	6.65633702202134	-3.27788376218134
Chr1	180000	190000	10001	*	0.386761314895648	152.143164106869	169.737624159024	260.978186975484	714.17305865178	0.0029	0	0.5372	0	Core	0	7.25873716017731	9.48214857942576	-3.28068511265548
Chr1	190000	200000	10001	*	1.54704525958259	169.790518076712	184.568728243643	295.882133802913	22.1171383244379	0.0033	0	0.5403	0	Core	0	7.41608407162173	4.53089091224727	-3.27508784068439
Chr1	200000	210000	10001	*	2.32056788937389	169.894940289551	129.431917764354	355.186786840333	34.556319953139	0.0027	0	0.5531	0	Core	0	7.41696587334681	5.15203410915361	-3.28349191323125
Chr1	210000	220000	10001	*	1.93380657447824	123.949166640257	144.193228417987	263.938705426	44.8083927240465	0.0033	1	0.5445	0	Core	0	6.96519746904665	5.51754003888873	-3.27508784068439
Chr1	220000	230000	10001	*	0.773522629791296	126.559721961239	178.601389894302	264.259271118095	360.052795714273	0.0031	1	0.5348	0	Core	0	6.99502904787438	8.4960660034688	-3.27788376218134
Chr1	230000	240000	10001	*	0.773522629791296	116.117500677309	153.789825178622	320.150842374983	774.455246544716	0.0029	0	0.5526	0	Core	0	6.87181286129171	9.59889971191155	-3.28068511265548
Chr1	240000	250000	10001	*	82.7669213876687	104.631057264985	118.579039245963	332.143770620388	219.257662993809	0.0031	0	0.5892	0	Core	0	6.72289026286747	7.78304840265867	-3.27788376218134
Chr1	250000	260000	10001	*	1092.9874758951	165.926896201658	162.723384344887	289.131397463518	662.99471137941	0.0033	0	0.5468	0	Core	0	7.38307261835482	9.37502794053806	-3.27508784068439
Chr1	260000	270000	10001	*	194.927702707407	73.0955489875144	131.665307555921	281.871527377856	111.26916314025	0.003	0	0.5878	0	Core	0	6.21131497552227	6.81081790830717	-3.27928375747887
Chr1	270000	280000	10001	*	0.386761314895648	166.814485010792	169.563140581558	271.160861900828	404.53312210965	0.0034	0	0.547	0	Core	0	7.39072343803948	8.66367594182972	-3.27369190923451
Chr1	280000	290000	10001	*	7.34846498301731	134.182543498509	131.839791133387	317.850312114072	190.524520374546	0.003	0	0.5672	0	Core	0	7.07876505416014	7.58138529815551	-3.27928375747887
Chr1	290000	300000	10001	*	8.8955102425999	89.2809919776069	134.003387493966	298.786081837178	234.020647783916	0.0034	0	0.5767	0	Core	0	6.49635036535898	7.87664370038154	-3.27369190923451
Chr1	300000	310000	10001	*	720.923090965488	77.8467596717028	102.037996102176	340.252196949829	97.7637659433743	0.0034	0	0.5904	0	Core	0	6.30097956136005	6.6259099435617	-3.27369190923451
Chr1	310000	320000	10001	*	838.111769378869	109.173423523495	151.451745240577	336.197983785108	97.4903773361501	0.0032	0	0.5877	0	Core	0	6.78363244294911	6.62191087278055	-3.2764851241262
Chr1	320000	330000	10001	*	1.54704525958259	146.138886868609	364.042536025275	323.431926517594	337.306863593219	0.0034	2	0.5572	0	Core	0	7.20103477204625	8.40218863670105	-3.27369190923451
Chr1	330000	340000	10001	*	0.386761314895648	59.4684502119849	206.588555719865	311.193859801764	93.908986581513	0.0029	0	0.5584	0	Core	0	5.9181106985149	6.56847279206805	-3.28068511265548
Chr1	340000	350000	10001	*	1.16028394468694	145.303509165895	176.542483680202	261.807886413845	38.137710707776	0.0029	0	0.5656	0	Core	0	7.19282056345836	5.29048746538629	-3.28068511265548
Chr1	350000	360000	10001	*	74.64493377486	186.132594386063	129.082950609422	326.147306497686	231.068050825895	0.0038	0	0.5787	0	Core	0	7.54791705601587	7.85840410802912	-3.26812165119157
Chr1	360000	370000	10001	*	439.747615036352	209.26211452997	435.511009355391	296.655262825022	33.0526826134059	0.0028	0	0.5354	0	Core	0	7.71604511543376	5.08969655070502	-3.28208783035557
Chr1	370000	380000	10001	*	385.987792265857	184.879527831992	621.754779942708	258.036525330384	13.3687028932634	0.0028	0	0.5163	0	Core	0	7.5382240750313	3.84485792606889	-3.28208783035557
Chr1	380000	390000	10001	*	1280.56671361949	95.9118024929028	165.550018299838	352.546834081911	123.954394515453	0.0032	0	0.6031	0	Core	0	6.59860047116848	6.96525783016825	-3.2764851241262
Chr1	390000	400000	10001	*	148.903106234824	135.383398946161	387.842095991652	333.614601442938	138.826734748449	0.0029	1	0.5471	0	Core	0	7.09152423504852	7.12749641888213	-3.28068511265548
Chr1	400000	410000	10001	*	1.16028394468694	126.664144174079	149.148562018024	370.17794714709	85.1058734288938	0.0034	0	0.5783	0	Core	0	6.9962095755367	6.42803974456213	-3.27369190923451
Chr1	410000	420000	10001	*	1.93380657447824	195.73943796728	542.678822635071	254.64230035527	55.8532924559043	0.0026	0	0.5375	0	Core	0	7.62014237594589	5.82917199496817	-3.2848973639424
Chr1	420000	430000	10001	*	103.265271077138	120.503233616559	241.694651506045	281.381250437006	147.793881065403	0.0033	0	0.5685	0	Core	0	6.92485089916542	7.2171713886796	-3.27508784068439
Chr1	430000	440000	10001	*	0.386761314895648	185.610483321867	133.584626908048	342.55272721074	112.663445037093	0.0033	0	0.5702	0	Core	0	7.5438862253301	6.82862453773225	-3.27508784068439
Chr1	440000	450000	10001	*	172.495546443459	154.701508321432	141.261904316556	322.658797495484	51.8891576511533	0.0033	0	0.571	0	Core	0	7.2826391100254	5.72490009310304	-3.27508784068439
Chr1	450000	460000	10001	*	0.386761314895648	117.057300592862	121.615053493873	312.721261040565	344.223595355991	0.0031	0	0.5885	0	Core	0	6.88334344949841	8.43138726303938	-3.27788376218134
Chr1	460000	470000	10001	*	66.1361848471558	1063.69687108759	517.483394048965	66.9416592314283	8.06496391311393	0.0059	5	0.2689	0	Core	0	10.0562270251342	3.18030127672893	-3.23922550555711
Chr1	470000	480000	10001	*	1.16028394468694	1233.64402248356	609.610722951067	89.3435440671851	2.18710885779361	0.0119	4	0.3256	0	Core	0	10.2698794228062	1.67224829615277	-3.15971805857306
Chr1	480000	490000	10001	*	399.9111996021	557.771249881155	432.335408245508	149.647607791722	51.479074740317	0.004	4	0.4341	0	Core	0	9.12611398231715	5.71367037888064	-3.26534456652099
Chr1	490000	500000	10001	*	1.93380657447824	237.351689783743	154.732036496939	281.343536826172	4240.36665349025	0.0029	0	0.5678	0	Core	0	7.89694804314113	12.0503134896685	-3.28068511265548
Chr1	500000	510000	10001	*	0.773522629791296	186.132594386063	127.442804981241	266.823796654848	44.9997647491035	0.003	0	0.5782	0	Core	0	7.54791705601587	5.52355457787941	-3.27928375747887
Chr1	510000	520000	10001	*	343.830808942231	208.896636785032	231.644397443997	292.619906465719	26.9561166723062	0.0032	0	0.5648	0	Core	0	7.71353524000447	4.80509206766434	-3.2764851241262
Chr1	520000	530000	10001	*	0	113.820211994844	155.744041246243	289.319965517691	144.431201196545	0.003	0	0.573	0	Core	0	6.84323281417559	7.18419301186916	-3.27928375747887
Chr1	530000	540000	10001	*	503.563231994134	364.799000554116	279.627381247175	305.517961371155	3.44469645102493	0.0031	1	0.5519	0	Core	0	8.51490732309648	2.15208489407085	-3.27788376218134
Chr1	540000	550000	10001	*	52.5995388258081	1093.82267949173	601.130821086215	105.239831033972	0.218710885779361	0.0045	5	0.3024	0	Core	0	10.0964815105311	0.285355916669275	-3.2584251525812
Chr1	550000	560000	10001	*	347.698422091187	1643.86668562278	547.843536528067	41.843251220997	0	0.0052	7	0.2409	0	Core	0	10.6837549447413	0	-3.24879339025715
Chr1	560000	570000	10001	*	857.063073808756	2160.96548360302	606.923675858089	24.2875653774872	0	0.0225	4	0.2088	0	Core	0	11.0781277748798	0	-3.02914634565952
Chr1	570000	580000	10001	*	729.818601208088	1787.02953942547	649.602358906298	46.3877413265672	0	0.0051	8	0.2594	0	Core	0	10.8041548556523	0	-3.25016542558727
Chr1	580000	590000	10001	*	1320.40312905374	2153.1860287465	656.23273485001	14.0860336467259	0	0.0145	7	0.1956	0	Core	0	11.0729271265411	0	-3.12658049656514
Chr1	590000	600000	10001	*	129.951801804938	2063.06965906617	632.468071599127	15.8962869667871	0	0.013	7	0.2	0	Core	0	11.0112759449065	0	-3.1456053222469
Chr1	600000	610000	10001	*	1110.00497375051	1362.60545534011	607.656506883447	136.051851085846	22.9919818675553	0.0049	5	0.3302	0	Core	0	10.4132105610158	4.58448043185996	-3.25291341697218
Chr1	610000	620000	10001	*	727.111272003818	1692.57964791232	616.973929920137	114.34766805053	0	0.0044	5	0.3012	0	Core	0	10.7258601220676	0	-3.25980638297956
Chr1	620000	630000	10001	*	71.1640819407992	2092.98662304464	623.988169734274	16.8391272376522	0	0.0179	4	0.1965	0	Core	0	11.0320365106324	0	-3.08436437656969
Chr1	630000	640000	10001	*	111.387258689947	2425.93684868276	603.015243722849	20.6670587373649	0	0.026	7	0.2172	0	Core	0	11.2449208532758	0	-2.98850436116217
Chr1	640000	650000	10001	*	30.1673825618605	2694.51078010546	547.459672657642	40.0518547063531	0.1366943036121	0.0185	6	0.2602	0	Core	0	11.3963429639857	0.184844315829825	-3.07704103576383
Chr1	650000	660000	10001	*	35.9688022852953	2578.81096827951	712.835207380013	28.9263395101439	0	0.0155	3	0.2269	0	Core	0	11.333049642901	0	-3.11403524324603
Chr1	660000	670000	10001	*	493.894199121742	1947.10879170812	548.820644561877	16.4619911293062	0	0.0176	8	0.1927	0	Core	0	10.9278585313201	0	-3.08804003471308
Chr1	670000	680000	10001	*	1389.63340442006	2136.89616354356	751.361181284528	22.0247487274108	0	0.0197	5	0.2262	0	Core	0	11.0619760685069	0	-3.06250494260595
Chr1	680000	690000	10001	*	3.48085183406083	501.069988309411	234.505928114441	202.182667684331	72.6666918001926	0.0036	2	0.5043	0	Core	0	8.97174467894853	6.20294055088757	-3.2709040918629
Chr1	690000	700000	10001	*	357.754216278474	172.609917823373	124.860448034743	346.022379407524	213.817229710048	0.0026	0	0.5716	0	Core	0	7.43970555683068	7.74696590106994	-3.2848973639424
Chr1	700000	710000	10001	*	1.54704525958259	275.152530831572	260.294600863931	247.382430269608	131.335886910506	0.003	2	0.546	0	Core	0	8.10932153898862	7.04806053519444	-3.27928375747887
Chr1	710000	720000	10001	*	0.386761314895648	154.753719427852	113.728395792405	308.742475097514	71.327087624794	0.0028	0	0.5941	0	Core	0	7.28312280526186	6.1764641551089	-3.28208783035557
Chr1	720000	730000	10001	*	1685.89257163013	201.848137418379	100.572334051461	234.239236893747	314.260204004219	0.0036	0	0.5669	0	Core	0	7.66425624534033	8.30039925668997	-3.2709040918629
Chr1	730000	740000	10001	*	2571.57598274116	1680.5710934358	730.946602720995	79.6888596935256	0.847504682395023	0.047	6	0.316	0	Core	0	10.7155940590538	0.885578020804183	-2.76611193982572
Chr1	740000	750000	10001	*	219.680426860728	580.587503386543	498.953238122065	198.505590627956	17.9889703553524	0.0059	4	0.4449	0	Core	0	9.18385246007083	4.24708977480871	-3.23922550555711
Chr1	750000	760000	10001	*	1.16028394468694	714.665624672212	382.782072245135	203.106651149779	652.906671772837	0.0074	1	0.456	0	Core	0	9.48314187460479	9.35294093287036	-3.21893410156404
Chr1	760000	770000	10001	*	8.12198761280861	136.270987755295	132.049171426346	260.148487537122	33.2713934991853	0.0031	0	0.5909	0	Core	0	7.10088293365473	5.09893294894146	-3.27788376218134
Chr1	770000	780000	10001	*	453.284261057699	120.712078042238	97.5014230880578	326.46787218978	17.1961433944022	0.0032	0	0.6027	0	Core	0	6.92732853011095	4.18556080380839	-3.2764851241262
Chr1	780000	790000	10001	*	175.202875647729	67.7700161327098	115.717508575519	295.071291169969	58.6965339710359	0.0028	0	0.6103	0	Core	0	6.10370777892125	5.89957526477008	-3.28208783035557
Chr1	790000	800000	10001	*	1.16028394468694	141.909787248617	132.74710573621	292.205056746539	344.907066874052	0.0035	0	0.5633	0	Core	0	7.158960913287	8.43424067801579	-3.27229732716276
Chr1	800000	810000	10001	*	443.615228185308	78.3166596294797	121.929123933312	246.137881112066	264.066055717856	0.003	0	0.5646	0	Core	0	6.3095520155522	8.05020812070036	-3.27928375747887
Chr1	810000	820000	10001	*	43.3172672683126	154.388241682914	184.53383152815	265.296395416046	126.278197676858	0.0033	1	0.5444	0	Core	0	7.27973352809205	6.99184150141531	-3.27508784068439
Chr1	820000	830000	10001	*	978.506126685989	134.286965711348	133.514833477061	258.564515882069	234.704119301977	0.0032	0	0.5667	0	Core	0	7.07987903862772	7.88083316195891	-3.2764851241262
Chr1	830000	840000	10001	*	401.458244861683	82.0236481852751	142.762463082765	298.597513783005	207.228564275944	0.0033	0	0.5563	0	Core	0	6.37545042243435	7.70202417730068	-3.27508784068439
Chr1	840000	850000	10001	*	39.8364154342517	153.813919512298	150.020979905355	253.831457722326	414.949228044892	0.003	0	0.5448	0	Core	0	7.27439138159655	8.7002636293956	-3.27928375747887
Chr1	850000	860000	10001	*	0.386761314895648	166.971118330051	148.764698147599	245.402465700791	537.94676243506	0.003	0	0.5287	0	Core	0	7.39206938096899	9.07399895929377	-3.27928375747887
Chr1	860000	870000	10001	*	233.603834196971	105.466434967699	131.525720693948	347.342355786735	198.124723655378	0.0034	0	0.5706	0	Core	0	6.73425486212224	7.63752854935938	-3.27369190923451
Chr1	870000	880000	10001	*	1.16028394468694	58.2675947643329	74.5044875780256	348.454907306356	38.1923884292209	0.0035	0	0.6254	0	Core	0	5.88917160520241	5.2925015900014	-3.27229732716276
Chr1	880000	890000	10001	*	885.296649796138	158.251863557969	130.094955358726	277.213896439782	83.0827977354347	0.0033	0	0.5795	0	Core	0	7.31516644470596	6.39373876861045	-3.27508784068439
Chr1	890000	900000	10001	*	454.057783687491	121.808511277051	102.840620558521	275.856206449736	41.8557957660252	0.003	0	0.5735	0	Core	0	6.94026674031732	5.42141842075317	-3.27928375747887
Chr1	900000	910000	10001	*	435.4932405725	93.4056693847595	81.7979011161086	288.791974966007	80.7316557133065	0.0031	0	0.6259	0	Core	0	6.56080159586937	6.35282305569728	-3.27788376218134
Chr1	910000	920000	10001	*	1196.25274697224	92.726925001304	137.423265612302	256.999401032433	23.4567424998364	0.003	0	0.5632	0	Core	0	6.55039164635635	4.6121603527062	-3.27928375747887
Chr1	920000	930000	10001	*	0.773522629791296	65.8382051951826	66.6876233075442	323.149074436334	54.8144157484523	0.0034	0	0.6127	0	Core	0	6.06260108814919	5.80256588437513	-3.27369190923451
Chr1	930000	940000	10001	*	594.838902309506	52.7332174838497	138.679547370058	288.810831771424	152.824231438328	0.0028	0	0.5588	0	Core	0	5.74774232245439	7.26513897410378	-3.28208783035557
Chr1	940000	950000	10001	*	382.506940431796	96.486124663519	128.454809730544	243.158505856132	774.810651734108	0.003	0	0.5446	0	Core	0	6.60712498755832	9.59956077371118	-3.27928375747887
Chr1	950000	960000	10001	*	0.773522629791296	72.9389156682554	129.082950609422	315.436641020657	155.831506117795	0.0031	0	0.5849	0	Core	0	6.20826198110252	7.29307160352607	-3.27788376218134
Chr1	960000	970000	10001	*	0.386761314895648	95.4419025351259	106.400085538829	307.384785107468	330.253437526835	0.003	0	0.5596	0	Core	0	6.59158820653827	8.37179161574075	-3.27928375747887
Chr1	970000	980000	10001	*	974.251752222137	90.9517473830358	135.259669251722	234.786084250849	103.668959859417	0.0033	0	0.5665	0	Core	0	6.52280508569518	6.70968985652939	-3.27508784068439
Chr1	980000	990000	10001	*	0.386761314895648	87.8190809978566	144.646885719399	281.701816129101	96.0960954393066	0.0032	0	0.569	0	Core	0	6.47279773884839	6.60134137607652	-3.2764851241262
Chr1	990000	1000000	10001	*	0.773522629791296	121.86072238347	556.602612116865	241.253968508984	122.970195529446	0.003	2	0.5254	0	Core	0	6.94087996081972	6.95384950449772	-3.27928375747887
Chr1	1000000	1010000	10001	*	855.516028549173	73.3566045196127	103.189587713453	247.401287075025	389.852153901711	0.0028	0	0.5708	0	Core	0	6.2163889862507	8.61047917794877	-3.28208783035557
Chr1	1010000	1020000	10001	*	1.54704525958259	84.1643035484809	138.505063792592	327.109003573968	152.38680966677	0.0034	0	0.5808	0	Core	0	6.41217694922406	7.26103061494587	-3.27369190923451
Chr1	1020000	1030000	10001	*	1.93380657447824	41.9255184549815	114.251846524804	280.58926460948	1181.20281637288	0.0027	0	0.5849	0	Core	0	5.42376365410985	10.2072618473136	-3.28349191323125
Chr1	1030000	1040000	10001	*	1.54704525958259	133.242743582955	93.73257781479	321.979952500461	134.917277665143	0.0033	0	0.6155	0	Core	0	7.0687002960128	7.08658505145357	-3.27508784068439
Chr1	1040000	1050000	10001	*	0.773522629791296	85.2085256768739	120.742635606543	324.242769150538	28.7331426192635	0.0031	0	0.5606	0	Core	0	6.42975864800125	4.89400005061924	-3.27788376218134
Chr1	1050000	1060000	10001	*	0.773522629791296	120.3466002973	123.63906299248	416.923967776586	63.7542232046837	0.0031	0	0.5886	0	Core	0	6.9229898796158	6.01690238186055	-3.27788376218134
Chr1	1060000	1070000	10001	*	111.387258689947	129.901232772097	102.805723843027	345.588672882926	290.721444922215	0.0039	0	0.5871	0	Core	0	7.03233487380972	8.18844763478947	-3.26673244064524
Chr1	1070000	1080000	10001	*	1.54704525958259	77.220226394667	104.759939910648	309.138468011278	252.228329025048	0.0025	0	0.6153	0	Core	0	6.28946980659093	7.98429499998238	-3.28630418515664
Chr1	1080000	1090000	10001	*	473.009088117377	73.1477600939341	95.0586530035324	296.655262825022	754.661911381684	0.0029	0	0.5955	0	Core	0	6.21233120631059	9.56159709635049	-3.28068511265548
Chr1	1090000	1100000	10001	*	747.996383008183	117.683833869898	120.533255313583	278.797868094836	103.860331884474	0.0023	0	0.5687	0	Core	0	6.89097962615239	6.71232520689962	-3.28912194980412
Chr1	1100000	1110000	10001	*	0.386761314895648	147.653008954779	124.092720293892	282.776654037887	40.2428029834024	0.0034	0	0.5598	0	Core	0	7.21580485557799	5.36607048076591	-3.27369190923451
Chr1	1110000	1120000	10001	*	1.93380657447824	91.9437584050092	81.8676945470951	304.348839435282	288.835063532368	0.003	0	0.5907	0	Core	0	6.53828607976867	8.17908832892166	-3.27928375747887
Chr1	1120000	1130000	10001	*	0.386761314895648	189.735160729019	206.030208271973	251.172648158486	474.137861508932	0.007	0	0.5282	0	Core	0	7.57542700895548	8.89220236270915	-3.22431729826094
Chr1	1130000	1140000	10001	*	1.54704525958259	77.9511818845421	136.690434586944	296.014131440834	81.1964163455877	0.0028	0	0.5857	0	Core	0	6.30288895801157	6.36100359058079	-3.28208783035557
Chr1	1140000	1150000	10001	*	0.386761314895648	85.6784256346508	112.088250164224	348.209768835931	84.2583687464987	0.003	0	0.6087	0	Core	0	6.43760104446905	6.41376954728222	-3.27928375747887
Chr1	1150000	1160000	10001	*	411.900800363865	90.3774252124196	122.592161527683	300.596335157239	68.1831186417157	0.0031	0	0.583	0	Core	0	6.51376588646406	6.11234814397732	-3.27788376218134
Chr1	1160000	1170000	10001	*	432.399150053334	79.3086706514531	137.667542620755	352.169697973565	100.497652015616	0.0032	0	0.5855	0	Core	0	6.32748385386963	6.66530254314963	-3.2764851241262
Chr1	1170000	1180000	10001	*	800.982683148887	115.647600719532	149.42773574197	306.687083307028	105.227274920595	0.0024	0	0.5458	0	Core	0	6.86601282315229	6.7310104299335	-3.28771237954945
Chr1	1180000	1190000	10001	*	1092.9874758951	101.655024199065	127.268321403775	218.531517981133	150.527767137645	0.0032	0	0.5542	0	Core	0	6.68166042812913	7.24343837846402	-3.2764851241262
Chr1	1190000	1200000	10001	*	433.946195312917	77.7945485652832	104.969320203607	370.762508115026	432.036015996405	0.0027	0	0.5778	0	Core	0	6.30002391454504	8.7583432099659	-3.28349191323125
Chr1	1200000	1210000	10001	*	0	30.9089750004347	120.463461882597	234.786084250849	1809.58653007771	0.0034	0	0.5529	0	Core	0	4.99589036111849	10.8222414112309	-3.27369190923451
Chr1	1210000	1220000	10001	*	368.970294410448	77.220226394667	139.656655403868	278.13787990523	891.957669929678	0.003	0	0.5658	0	Core	0	6.28946980659093	9.80244797673378	-3.27928375747887
Chr1	1220000	1230000	10001	*	0.773522629791296	115.90865625163	192.385592514124	209.46139457541	104.762514288314	0.0035	0	0.5293	0	Core	0	6.86923794487057	6.72468456927613	-3.27229732716276
Chr1	1230000	1240000	10001	*	1492.51191418231	150.994519765637	131.735100986907	266.39009013025	277.981535825568	0.003	0	0.5641	0	Core	0	7.24787549732865	8.12402583134753	-3.27928375747887
Chr1	1240000	1250000	10001	*	0.773522629791296	75.9149487341757	150.50953392226	274.668227708446	379.518064548636	0.0034	0	0.5742	0	Core	0	6.26519211399464	8.57182113500448	-3.27369190923451
Chr1	1250000	1260000	10001	*	3.09409051916518	107.398245905227	149.008975156051	282.060095432029	172.125467108357	0.0029	0	0.5541	0	Core	0	6.76019760103933	7.43567415346508	-3.28068511265548
Chr1	1260000	1270000	10001	*	0	122.957155618283	154.801829927926	223.58514183297	70.2061943351748	0.0036	0	0.5272	0	Core	0	6.95369774540299	6.15393084377462	-3.2709040918629
Chr1	1270000	1280000	10001	*	441.294660295934	109.173423523495	147.194345950404	338.517370851437	217.699347932631	0.003	0	0.552	0	Core	0	6.78363244294911	7.77280510867119	-3.27928375747887
Chr1	1280000	1290000	10001	*	1.54704525958259	147.757431167618	147.682899967309	269.218610942845	122.259385150663	0.0041	0	0.5529	0	Core	0	7.21681792973067	6.94555368947999	-3.26395802625003
Chr1	1290000	1300000	10001	*	1.16028394468694	111.731767738058	132.084068141839	289.88566968021	44.4529875346551	0.0033	0	0.5668	0	Core	0	6.81675031309279	5.50630321790479	-3.27508784068439
Chr1	1300000	1310000	10001	*	0.386761314895648	129.170277282222	118.788419538922	299.955203773051	170.512474325734	0.0037	0	0.569	0	Core	0	7.02425625492335	7.42216969907893	-3.26951220073622
Chr1	1310000	1320000	10001	*	449.416647908743	70.6938380922103	128.594396592517	308.874472735435	56.4274085310751	0.0032	0	0.5666	0	Core	0	6.16377722307778	5.84366755503162	-3.2764851241262
Chr1	1320000	1330000	10001	*	378.639327282839	60.2516168082797	138.784237516538	235.464929245872	88.8239584871429	0.0034	0	0.5505	0	Core	0	5.93667602113321	6.4890283970976	-3.27369190923451
Chr1	1330000	1340000	10001	*	0.773522629791296	96.7471801956173	139.13320467147	288.848545382259	292.389115426283	0.0029	0	0.56	0	Core	0	6.61098317913367	8.19667153859172	-3.28068511265548
Chr1	1340000	1350000	10001	*	509.364651717568	177.361128507562	121.719743640353	297.767814344643	298.67705339244	0.0031	0	0.5676	0	Core	0	7.47865742263467	8.22726480908053	-3.27788376218134
Chr1	1350000	1360000	10001	*	990.108966132859	88.2889809556335	143.704674401082	258.225093384557	29.0338700872101	0.003	0	0.5524	0	Core	0	6.4804102399814	4.90851848373121	-3.27928375747887
Chr1	1360000	1370000	10001	*	472.235565487586	54.2995506764393	123.74375313896	316.379481291522	60.0634770071569	0.003	0	0.5709	0	Core	0	5.78919585311396	5.93223783507347	-3.27928375747887
Chr1	1370000	1380000	10001	*	0.773522629791296	68.5531827290046	151.940299257482	297.57924629047	1829.46188182291	0.0032	0	0.5692	0	Core	0	6.12004462837942	10.8379920154323	-3.2764851241262
Chr1	1380000	1390000	10001	*	372.837907559405	24.4347978043977	134.317457933405	235.672354105462	306.93338933061	0.003	0	0.5425	0	Core	0	4.66873172033413	8.26647449759272	-3.27928375747887
Chr1	1390000	1400000	10001	*	0	112.462723227933	169.074586564653	204.91690446984	40.8989356407405	0.0033	0	0.537	0	Core	0	6.82607458555128	5.38884169047478	-3.27508784068439
Chr1	1400000	1410000	10001	*	1.16028394468694	104.735479477824	163.595802232217	243.139649050714	3829.60027113588	0.0028	0	0.537	0	Core	0	6.7243157432032	11.9033547708943	-3.28208783035557
Chr1	1410000	1420000	10001	*	1.54704525958259	89.0199364455086	188.965714395788	259.865635455863	299.770607821336	0.0024	0	0.534	0	Core	0	6.49217264106182	8.23251977932269	-3.28771237954945
Chr1	1420000	1430000	10001	*	0.386761314895648	140.761142907385	152.289266412414	312.589263402644	131.499920074841	0.0026	0	0.5668	0	Core	0	7.14731833013025	7.04984767920403	-3.2848973639424
Chr1	1430000	1440000	10001	*	4.64113577874777	122.121777915569	121.231189623448	245.798458614554	72.4753197751357	0.0033	0	0.5747	0	Core	0	6.94394215965497	6.19918782759348	-3.27508784068439
Chr1	1440000	1450000	10001	*	351.179273925248	86.3571700181063	118.683729392443	315.323500188153	232.298299558404	0.0031	0	0.5895	0	Core	0	6.44885421503048	7.86603198176208	-3.27788376218134
Chr1	1450000	1460000	10001	*	583.622824177533	123.949166640257	132.921589313677	320.791973759171	1363.88108372009	0.0027	0	0.5633	0	Core	0	6.96519746904665	10.4145595454038	-3.28349191323125
Chr1	1460000	1470000	10001	*	2.32056788937389	94.2932581938936	126.116729792499	252.775476618957	69.3313507920574	0.0027	0	0.5632	0	Core	0	6.57430224486425	6.13609602102708	-3.28349191323125
Chr1	1470000	1480000	10001	*	2.32056788937389	40.2025519431329	135.189875820736	276.685905888098	156.843043964524	0.0034	0	0.5574	0	Core	0	5.36466179058918	7.30234687323836	-3.27369190923451
Chr1	1480000	1490000	10001	*	0.773522629791296	43.64848496683	161.850966457556	260.638764477972	16.6493661799538	0.0027	0	0.5602	0	Core	0	5.48053931686489	4.1415444695761	-3.28349191323125
Chr1	1490000	1500000	10001	*	501.629425419655	99.3055244101803	131.909584564373	328.900400088612	43.1953999414237	0.003	0	0.567	0	Core	0	6.64825725554225	5.46582431004567	-3.27928375747887
Chr1	1500000	1510000	10001	*	261.063887554562	86.6704366566242	123.988030147412	265.371822637716	236.481145248934	0.0029	0	0.5573	0	Core	0	6.45401852844421	7.89166916538393	-3.28068511265548
Chr1	1510000	1520000	10001	*	1681.25143585138	115.125489655335	150.998087939165	298.522086561336	171.82473964041	0.0029	0	0.555	0	Core	0	6.85954086967079	7.43316594200873	-3.28068511265548
Chr1	1520000	1530000	10001	*	0.386761314895648	70.0673048151745	129.641298057314	308.780188708349	112.034651240478	0.0032	0	0.565	0	Core	0	6.15111408188172	6.82062129435779	-3.2764851241262
Chr1	1530000	1540000	10001	*	116.41515578359	124.784544342971	135.678429837641	235.785494937966	1477.4193723003	0.0031	0	0.5501	0	Core	0	6.97481085309206	10.5298398508431	-3.27788376218134
Chr1	1540000	1550000	10001	*	18.9513044298867	144.781398101698	142.553082789805	350.340587848086	212.614319838261	0.003	0	0.5925	0	Core	0	7.18766283139727	7.7388645524705	-3.27928375747887
Chr1	1550000	1560000	10001	*	1.54704525958259	84.1643035484809	120.707738891049	281.211539188251	40.6255470335163	0.0039	0	0.585	0	Core	0	6.41217694922406	5.37939732676749	-3.26673244064524
Chr1	1560000	1570000	10001	*	0.773522629791296	102.908090753136	94.9539628570527	310.684726055496	117.174357056293	0.0029	0	0.5719	0	Core	0	6.6991641831408	6.8847732053135	-3.28068511265548
Chr1	1570000	1580000	10001	*	1.54704525958259	66.4125273657988	94.5700989866273	303.745421661929	122.040674264883	0.0033	0	0.6	0	Core	0	6.07494480927859	6.9429915042009	-3.27508784068439
Chr1	1580000	1590000	10001	*	727.498033318714	46.6767291391699	127.826668851666	224.056561968403	108.070516435727	0.0032	0	0.5375	0	Core	0	5.57521335802461	6.7691173598092	-3.2764851241262
Chr1	1590000	1600000	10001	*	1.93380657447824	49.2872844601526	142.239012350366	308.817902319183	1356.11684727493	0.0027	0	0.5693	0	Core	0	5.65212174411539	10.4063292262934	-3.28349191323125
Chr1	1600000	1610000	10001	*	761.533029029531	102.438190795359	156.372182125121	257.22568269744	1347.94252791892	0.0031	0	0.5493	0	Core	0	6.69262513653409	10.397613167824	-3.27788376218134
Chr1	1610000	1620000	10001	*	1.16028394468694	78.6299262679976	136.411260862999	291.186789254004	184.81069848356	0.0027	0	0.5794	0	Core	0	6.31523881666844	7.53768976041254	-3.28349191323125
Chr1	1620000	1630000	10001	*	663.295655046036	78.6299262679976	214.23093641288	269.426035802436	21796.9729265176	0.0036	0	0.55	0	Core	0	6.31523881666844	14.411906359284	-3.2709040918629
Chr1	1630000	1640000	10001	*	919.718406821851	55.4481950176716	72.6549616568849	365.011182462749	161.900733198172	0.0034	0	0.615	0	Core	0	5.81885554513831	7.34784928706348	-3.27369190923451
Chr1	1640000	1650000	10001	*	613.403445424498	76.5414820112115	150.858501077192	299.502640443035	266.93663609371	0.003	0	0.5498	0	Core	0	6.27689640374217	8.06574805015257	-3.27928375747887
Chr1	1650000	1660000	10001	*	265.318262018414	40.4113963688115	111.564799431826	373.100751986772	83.5748972284382	0.0024	0	0.5741	0	Core	0	5.37195594527433	6.40215761381041	-3.28771237954945
Chr1	1660000	1670000	10001	*	462.566532615195	122.591677873346	120.60304874457	339.252786262712	34.22825362447	0.0031	0	0.5876	0	Core	0	6.94943779147113	5.13866105255404	-3.27788376218134
Chr1	1670000	1680000	10001	*	1.16028394468694	91.1605918087144	135.154979105243	343.080717762424	509.377652980131	0.0031	0	0.5912	0	Core	0	6.52607807595531	8.99542135147831	-3.27788376218134
Chr1	1680000	1690000	10001	*	423.503639810735	84.5297812934184	180.625399392909	306.53622886369	362.677326343625	0.0031	0	0.5706	0	Core	0	6.41835494580097	8.5065151727822	-3.27788376218134
Chr1	1690000	1700000	10001	*	730.978885152775	189.369682984082	782.733328512934	236.59633757091	7.27213695216375	0.0027	0	0.5179	0	Core	0	7.57265993264819	3.04826007087672	-3.28349191323125
Chr1	1700000	1710000	10001	*	254.102183886441	78.4732929487387	171.622046795658	291.922204665279	34.5289810924166	0.0044	0	0.587	0	Core	0	6.31239821813059	5.1509244102383	-3.25980638297956
Chr1	1710000	1720000	10001	*	1.54704525958259	78.6299262679976	157.733154029356	320.207412791235	136.612287029933	0.0027	0	0.5663	0	Core	0	6.31523881666844	7.1044654799147	-3.28349191323125
Chr1	1720000	1730000	10001	*	0.773522629791296	120.764289148658	241.938928514497	280.853259885322	91.2844559521607	0.0035	1	0.543	0	Core	0	6.92794727357534	6.52801576107644	-3.27229732716276
Chr1	1730000	1740000	10001	*	247.527241533215	56.1269394011271	149.253252164504	334.425444075882	185.767558608845	0.0029	0	0.5857	0	Core	0	5.8360993339096	7.54510007148862	-3.28068511265548
Chr1	1740000	1750000	10001	*	1.16028394468694	62.3400610650658	112.437217319156	319.076004466197	88.3318589941393	0.0031	0	0.5866	0	Core	0	5.98504635313167	6.48110287959412	-3.27788376218134
Chr1	1750000	1760000	10001	*	340.34995710817	76.3848486919525	194.898156029636	297.08896934962	80.3762505239151	0.0034	4	0.5667	0	Core	0	6.27397922124774	6.34653590349791	-3.27369190923451
Chr1	1760000	1770000	10001	*	0.773522629791296	119.981122552363	544.249174832265	267.257503179446	9.43190694923493	0.0029	3	0.5482	0	Core	0	6.91863814202866	3.38293100104176	-3.28068511265548
Chr1	1770000	1780000	10001	*	1094.14775983979	44.3794404567052	207.635457184661	298.597513783005	70.2061943351748	0.0032	0	0.5681	0	Core	0	5.5039669151071	6.15393084377462	-3.2764851241262
Chr1	1780000	1790000	10001	*	2.70732920426954	140.813354013805	290.201086041621	283.097219729981	12.2478096036442	0.0022	0	0.5762	0	Core	0	7.14784958174829	3.72768193869985	-3.29053289861183
Chr1	1790000	1800000	10001	*	754.571325361409	96.5383357699387	646.042893925989	253.718316889822	15.0637122580535	0.0034	0	0.5322	0	Core	0	6.60789745175018	4.00573342718228	-3.27369190923451
Chr1	1800000	1810000	10001	*	1.16028394468694	69.7018270702369	550.181616466113	273.668817021329	2.18710885779361	0.0033	0	0.5461	0	Core	0	6.14367559239886	1.67224829615277	-3.27508784068439
Chr1	1810000	1820000	10001	*	0.386761314895648	121.025344680756	285.350442588063	292.223913551956	24.8510243966799	0.0029	0	0.5709	0	Core	0	6.93103701664269	4.69214954613269	-3.28068511265548
Chr1	1820000	1830000	10001	*	897.286250557903	113.768000888424	187.46515562958	292.091915914035	91.3938113950504	0.0028	0	0.5573	0	Core	0	6.84257664193866	6.52972431699758	-3.28208783035557
Chr1	1830000	1840000	10001	*	1.54704525958259	91.3172251279733	167.259957359005	292.846188130727	155.202712321179	0.0029	2	0.5807	0	Core	0	6.52852795498128	7.28727569458842	-3.28068511265548
Chr1	1840000	1850000	10001	*	410.353755104282	130.684399368392	198.213344001492	289.621674404368	39.3952983010074	0.0028	0	0.5667	0	Core	0	7.04094062962123	5.33611547913779	-3.28208783035557
Chr1	1850000	1860000	10001	*	879.495230072703	38.0618965799271	258.794042097723	252.832047035209	122.751484643666	0.0027	1	0.5489	0	Core	0	5.28769009326796	6.95130202304945	-3.28349191323125
Chr1	1860000	1870000	10001	*	1889.32902326524	65.2638830245664	262.109230069578	294.863866310379	445.377380028946	0.0033	0	0.5597	0	Core	0	6.05015084186417	8.80212011087798	-3.27508784068439
Chr1	1870000	1880000	10001	*	1.93380657447824	144.363709250341	153.231477730731	314.531514360626	168.407382050108	0.0032	0	0.573	0	Core	0	7.18352332822382	7.4043529323022	-3.2764851241262
Chr1	1880000	1890000	10001	*	0.773522629791296	59.2596057863063	148.590214570133	284.700048190452	61.3210646003883	0.0028	0	0.5663	0	Core	0	5.91311932985092	5.96164797335405	-3.28208783035557
Chr1	1890000	1900000	10001	*	898.059773187694	78.2122374166404	131.700204271414	295.316429640394	68.3198129453278	0.003	0	0.577	0	Core	0	6.3076514228752	6.11519585637892	-3.27928375747887
Chr1	1900000	1910000	10001	*	1.16028394468694	102.490401901779	121.161396192461	357.242178630819	97.6544105004846	0.0031	0	0.5651	0	Core	0	6.69335316261234	6.62431164522738	-3.27788376218134
Chr1	1910000	1920000	10001	*	326.813311086823	76.019370947015	111.076245414921	304.593977905707	44.1795989274309	0.0029	1	0.5852	0	Core	0	6.26714943490972	5.4975995584476	-3.28068511265548
Chr1	1920000	1930000	10001	*	1.16028394468694	118.049311614836	141.855148479941	276.968757969357	2973.62054191691	0.0032	1	0.5745	0	Core	0	6.89541546823485	11.5384899271296	-3.2764851241262
Chr1	1930000	1940000	10001	*	0.773522629791296	96.9560246212959	123.359889268534	295.448427278315	432.063354857127	0.0031	0	0.5748	0	Core	0	6.61406232065207	8.75843428874999	-3.27788376218134
Chr1	1940000	1950000	10001	*	0.386761314895648	75.9149487341757	115.228954558614	332.803758809994	312.619872360874	0.003	0	0.5781	0	Core	0	6.26519211399464	8.29287316774871	-3.27928375747887
Chr1	1950000	1960000	10001	*	1.93380657447824	75.3406265635595	116.834203471302	266.258092492329	105.500663527819	0.0034	0	0.5858	0	Core	0	6.25437912236866	6.73471860863252	-3.27369190923451
Chr1	1960000	1970000	10001	*	7.34846498301731	59.4162391055653	140.98273059261	374.647010030991	777.216471477681	0.0033	0	0.5825	0	Core	0	5.91686447437485	9.60402770602443	-3.27508784068439
Chr1	1970000	1980000	10001	*	1181.5558170062	74.1397711159075	100.851507775407	292.789617714475	43.9062103202067	0.0029	0	0.6191	0	Core	0	6.23150481626433	5.48884307167117	-3.28068511265548
Chr1	1980000	1990000	10001	*	0.386761314895648	90.3252141059999	137.981613060193	315.078361717728	139.264156520008	0.0035	0	0.5771	0	Core	0	6.51294132578292	7.13200257565712	-3.27229732716276
Chr1	1990000	2000000	10001	*	0.773522629791296	82.7546036751502	121.370776485421	273.574532994243	65.339877126584	0.0031	0	0.5685	0	Core	0	6.38809658703792	6.05180443488439	-3.27788376218134
Chr1	2000000	2010000	10001	*	473.782610747169	112.253878802254	118.020691798071	320.131985569566	127.727157295147	0.0035	0	0.5779	0	Core	0	6.8234166513747	7.0081726377538	-3.27229732716276
Chr1	2010000	2020000	10001	*	1.54704525958259	68.5009716225849	111.215832276893	293.015899379483	437.039027508608	0.0032	0	0.5882	0	Core	0	6.11896124172044	8.77491560363037	-3.2764851241262
Chr1	2020000	2030000	10001	*	1.54704525958259	119.511222594586	109.22671949378	306.819080944949	57.0562023276907	0.0029	0	0.569	0	Core	0	6.91302369330589	5.85937829788534	-3.28068511265548
Chr1	2030000	2040000	10001	*	454.444545002386	85.051892357615	136.062293708066	303.651137634842	178.440743935236	0.003	0	0.5602	0	Core	0	6.42713501364823	7.48736369652784	-3.27928375747887
Chr1	2040000	2050000	10001	*	324.492743197449	89.6986808289641	96.2451413303019	259.695924207107	175.32411381288	0.0029	0	0.5811	0	Core	0	6.50300966245095	7.46208597866602	-3.28068511265548
Chr1	2050000	2060000	10001	*	0.386761314895648	56.440206039645	105.771944659951	303.764278467346	231.232083990229	0.0032	0	0.5775	0	Core	0	5.84398901904556	7.85942349107395	-3.2764851241262
Chr1	2060000	2070000	10001	*	1.16028394468694	137.00194324517	131.7699977024	266.955794292769	471.103247968743	0.003	0	0.5546	0	Core	0	7.10854477192622	8.88295859818217	-3.27928375747887
Chr1	2070000	2080000	10001	*	1.54704525958259	100.401957644993	129.466814479848	282.022381821195	543.523890022434	0.0029	0	0.5611	0	Core	0	6.66394169475366	9.08885153579829	-3.28068511265548
Chr1	2080000	2090000	10001	*	450.57693185343	88.4456142748924	162.444210620941	279.32585864652	531.95955193685	0.0029	0	0.5635	0	Core	0	6.48293884022792	9.05788223601544	-3.28068511265548
Chr1	2090000	2100000	10001	*	407.646425900013	64.0108164704947	154.452862772994	284.134344027933	368.637197981113	0.0031	0	0.5517	0	Core	0	6.02260786795315	8.52996613766105	-3.27788376218134
Chr1	2100000	2110000	10001	*	1.54704525958259	133.503799115053	530.813939367376	248.287556929638	50.1668094256409	0.0032	1	0.5589	0	Core	0	7.07150311264614	5.67713636987463	-3.2764851241262
Chr1	2110000	2120000	10001	*	1.93380657447824	174.228462122383	786.606863932681	226.31937861848	32.5332442596799	0.0029	0	0.519	0	Core	0	7.45309331875375	5.06752016200152	-3.28068511265548
Chr1	2120000	2130000	10001	*	2.70732920426954	123.740322214578	926.786970068948	213.270469269705	1.55831506117795	0.0032	1	0.5118	0	Core	0	6.96278408041033	1.35519394569309	-3.2764851241262
Chr1	2130000	2140000	10001	*	4.25437446385213	62.3922721714855	233.84289052007	251.832636348091	393.761610985017	0.0035	0	0.5689	0	Core	0	5.98623507437823	8.62483788996829	-3.27229732716276
Chr1	2140000	2150000	10001	*	0.773522629791296	98.1568800689479	144.018744840521	260.940473364649	205.396860607542	0.0028	0	0.5696	0	Core	0	6.63164097321126	7.68927721663872	-3.28208783035557
Chr1	2150000	2160000	10001	*	1.16028394468694	67.3523272813525	190.047512576078	245.063043203279	103.750976441584	0.0028	0	0.5471	0	Core	0	6.09491855488557	6.71081988191764	-3.28208783035557
Chr1	2160000	2170000	10001	*	613.790206739393	101.237335347707	127.6521852742	314.569227971461	970.611572228081	0.0033	0	0.5807	0	Core	0	6.6757783301282	9.92423586284509	-3.27508784068439
Chr1	2170000	2180000	10001	*	1040.0011757544	94.7631581516704	302.519626610728	255.867992707394	58.0677401744203	0.0033	0	0.5542	0	Core	0	6.58139882626885	5.8842985129844	-3.27508784068439
Chr1	2180000	2190000	10001	*	1.16028394468694	93.1968249590808	116.031579014958	313.796098949352	68.1831186417157	0.0034	0	0.5763	0	Core	0	6.55760652741134	6.11234814397732	-3.27369190923451
Chr1	2190000	2200000	10001	*	1.16028394468694	103.79567956227	168.167271961829	252.982901478547	134.452517032862	0.0034	0	0.5505	0	Core	0	6.71143542952631	7.08164339230017	-3.27369190923451
Chr1	2200000	2210000	10001	*	1.93380657447824	87.610236572178	145.065646305317	343.231572205763	40.871596780018	0.004	0	0.5769	0	Core	0	6.46940146859817	5.38790003142002	-3.26534456652099
Chr1	2210000	2220000	10001	*	182.551340630746	49.6527622050901	122.347884519231	285.077184298798	42.5939450055305	0.0031	0	0.5805	0	Core	0	5.66256903935164	5.4460558602307	-3.27788376218134
Chr1	2220000	2230000	10001	*	190.286566928659	85.4695812089722	123.499476130507	270.632871349143	105.883407577933	0.004	0	0.5655	0	Core	0	6.43412079691843	6.73989409837129	-3.26534456652099
Chr1	2230000	2240000	10001	*	1.16028394468694	70.3805714536924	153.964308756088	301.954025147285	1295.09651014248	0.0036	0	0.5525	0	Core	0	6.15745954614973	10.3399574330698	-3.2709040918629
Chr1	2240000	2250000	10001	*	1.16028394468694	114.237900846201	147.717796682802	276.271056168917	571.874288591584	0.0036	0	0.5678	0	Core	0	6.84847147573955	9.16207477880367	-3.2709040918629
Chr1	2250000	2260000	10001	*	33.6482343959214	65.0028274924682	171.656943511151	327.712421347322	383.591554796276	0.0032	0	0.5616	0	Core	0	6.04445592423703	8.58718327281836	-3.2764851241262
Chr1	2260000	2270000	10001	*	504.336754623925	136.375409968134	239.426364998985	213.289326075123	29.416614137324	0.0026	1	0.5178	0	Core	0	7.10197997637679	4.92678766152115	-3.2848973639424
Chr1	2270000	2280000	10001	*	0.773522629791296	133.242743582955	106.295395392349	231.56157052449	48.0343782892921	0.0031	0	0.5684	0	Core	0	7.0687002960128	5.61572168078668	-3.27788376218134
Chr1	2280000	2290000	10001	*	964.969480664642	67.0390606428346	87.2766854485442	293.110183406569	77.0955872372247	0.0027	0	0.6173	0	Core	0	6.08829131796863	6.28716912659865	-3.28349191323125
Chr1	2290000	2300000	10001	*	1.93380657447824	51.480150929778	98.5134278373612	361.560387071382	130.297010203054	0.0028	0	0.5897	0	Core	0	5.71369996395405	7.03669025441118	-3.28208783035557
Chr1	2300000	2310000	10001	*	0.773522629791296	76.8547486497294	126.744870671377	304.216841797361	168.54407635372	0.0037	0	0.5787	0	Core	0	6.28271313219401	7.4055165691578	-3.26951220073622
Chr1	2310000	2320000	10001	*	708.546728888827	91.7349139793306	166.841196773087	267.219789568611	172.480872297748	0.0033	0	0.5454	0	Core	0	6.53504069955961	7.43863279227602	-3.27508784068439
Chr1	2320000	2330000	10001	*	489.253063342995	88.2367698492138	138.92382437851	256.018847150733	100.524990876339	0.0038	0	0.5704	0	Core	0	6.47956638741538	6.6656910873875	-3.26812165119157
Chr1	2330000	2340000	10001	*	1.93380657447824	88.0801365299548	145.554200322222	294.788439088709	30.9475903377795	0.0034	0	0.5463	0	Core	0	6.4770318641821	4.99763521420244	-3.27369190923451
Chr1	2340000	2350000	10001	*	894.965682668529	71.3725824756658	107.412090288132	251.28578899099	150.609783719812	0.0031	0	0.5675	0	Core	0	6.17737134719656	7.24421904663868	-3.27788376218134
Chr1	2350000	2360000	10001	*	0	83.8510369099629	141.541078040502	255.434286182796	392.804750859732	0.0033	0	0.5611	0	Core	0	6.40686038501147	8.62133670578928	-3.27508784068439
Chr1	2360000	2370000	10001	*	1.54704525958259	57.0667393166809	171.796530373124	226.432519450983	208.622846172788	0.0025	0	0.5373	0	Core	0	5.85964011801474	7.71165215027609	-3.28630418515664
Chr1	2370000	2380000	10001	*	0.773522629791296	89.3854141904462	146.147444485607	345.814954547933	412.926152351433	0.0033	0	0.5608	0	Core	0	6.49801807357981	8.69322959242794	-3.27508784068439
Chr1	2380000	2390000	10001	*	1.54704525958259	61.1914167238335	120.149391443158	219.191506170739	215.566916796282	0.0033	0	0.5518	0	Core	0	5.95864357710117	7.75866906051717	-3.27508784068439
Chr1	2390000	2400000	10001	*	1.54704525958259	62.5489054907445	135.503946260175	218.229809094456	239.871163978514	0.003	0	0.5677	0	Core	0	5.98979537264831	7.9121178806725	-3.27928375747887
Chr1	2400000	2410000	10001	*	222.387756064998	49.7049733115098	134.840908665804	315.361213798988	57.5483018206943	0.0027	0	0.5645	0	Core	0	5.66405535335795	5.87155542120066	-3.28349191323125
Chr1	2410000	2420000	10001	*	1.16028394468694	85.5740034218115	116.171165876931	365.803168290275	15.9932335226158	0.0041	0	0.5809	0	Core	0	6.43586197012898	4.08688849380034	-3.26395802625003
Chr1	2420000	2430000	10001	*	1.54704525958259	87.453603252919	162.548900767421	276.044774503909	125.758759323132	0.003	1	0.5534	0	Core	0	6.46684900873848	6.98594163400855	-3.27928375747887
Chr1	2430000	2440000	10001	*	919.331645506955	67.0912717492543	136.132087139053	250.041239833448	245.038208655051	0.0029	0	0.5588	0	Core	0	6.08939797372537	7.94273856695195	-3.28068511265548
Chr1	2440000	2450000	10001	*	1.16028394468694	106.615079308932	119.660837426253	207.274005147003	723.112866108012	0.0032	0	0.5374	0	Core	0	6.74973643607048	9.50007077476766	-3.2764851241262
Chr1	2450000	2460000	10001	*	2.32056788937389	89.0199364455086	125.174518474182	289.244538296022	69.2493342098901	0.0025	0	0.5645	0	Core	0	6.49217264106182	6.13441264710147	-3.28630418515664
Chr1	2460000	2470000	10001	*	0.773522629791296	95.5463247479652	150.195463482821	202.446662960173	94.1823751887372	0.0031	0	0.5538	0	Core	0	6.59314943569141	6.57262255096443	-3.27788376218134
Chr1	2470000	2480000	10001	*	1.16028394468694	69.1797160060404	117.950898367085	306.366517614934	576.139150864281	0.0032	0	0.5851	0	Core	0	6.13298220453246	9.17277539089635	-3.2764851241262
Chr1	2480000	2490000	10001	*	0.773522629791296	91.8393361921699	116.345649454397	290.696512313154	592.979889069292	0.0028	0	0.5689	0	Core	0	6.5366643022349	9.21427027495704	-3.28208783035557
Chr1	2490000	2500000	10001	*	1.16028394468694	52.1588953132335	120.254081589638	302.010595563537	97.7364270826518	0.003	0	0.5869	0	Core	0	5.73223921939086	6.62551053494913	-3.27928375747887
Chr1	2500000	2510000	10001	*	488.479540713203	122.226200128408	160.908755139239	242.32880641777	570.534684416185	0.0038	0	0.5436	0	Core	0	6.94516522159232	9.15869724292463	-3.26812165119157
Chr1	2510000	2520000	10001	*	34.034995710817	78.0033929909618	201.703015550814	237.690032285114	120.810425532374	0.0032	0	0.5521	0	Core	0	6.30384270952037	6.92849380594325	-3.2764851241262
Chr1	2520000	2530000	10001	*	1.54704525958259	134.286965711348	153.824721894116	271.896277312103	642.845971026986	0.0031	0	0.5556	0	Core	0	7.07987903862772	9.33057177964542	-3.27788376218134
Chr1	2530000	2540000	10001	*	433.946195312917	61.4002611495121	133.340349899595	263.995275842252	26.9287778115838	0.0029	0	0.5727	0	Core	0	5.96348016176844	4.80368053625506	-3.28068511265548
Chr1	2540000	2550000	10001	*	342.283763682648	149.689242105146	107.586573865599	367.72656244284	85.5159563397301	0.0033	0	0.5876	0	Core	0	7.2354326145701	6.43489433178979	-3.27508784068439
Chr1	2550000	2560000	10001	*	0.773522629791296	89.0199364455086	107.691264012078	272.688263139629	161.408633705168	0.0038	0	0.581	0	Core	0	6.49217264106182	7.34348451855734	-3.26812165119157
Chr1	2560000	2570000	10001	*	515.939594070794	90.2730029995803	96.9081789246731	256.527980897	403.330212237864	0.0033	0	0.5755	0	Core	0	6.51211629356127	8.65939019802754	-3.27508784068439
Chr1	2570000	2580000	10001	*	935.575620732572	32.8929970443815	105.283390643046	314.097807836028	119.252110471196	0.0031	0	0.6091	0	Core	0	5.08291531004773	6.90991840384996	-3.27788376218134
Chr1	2580000	2590000	10001	*	1.93380657447824	71.6858491141838	128.175636006599	529.404812090803	43.6601605737049	0.0034	1	0.5763	0	Core	0	6.18360261446613	5.48091653320564	-3.27369190923451
Chr1	2590000	2600000	10001	*	228.962698418224	79.1520373321942	112.402320603663	359.561565697148	82.2079541923172	0.0032	0	0.5963	0	Core	0	6.32466728665455	6.37864954302896	-3.2764851241262
Chr1	2600000	2610000	10001	*	0.773522629791296	84.7908368255167	90.2778029809612	274.159093962179	165.017363320528	0.0039	1	0.5952	0	Core	0	6.42275165901841	7.37519032692775	-3.26673244064524
Chr1	2610000	2620000	10001	*	2.32056788937389	78.1078152038011	110.134034096604	267.219789568611	1011.29179698304	0.0026	0	0.5696	0	Core	0	6.30574832307231	9.98340949700741	-3.2848973639424
Chr1	2620000	2630000	10001	*	211.945200562815	78.8909818000959	103.957315454304	375.948129604785	35.7045521034806	0.0037	0	0.5766	0	Core	0	6.31996075390327	5.19788709228451	-3.26951220073622
Chr1	2630000	2640000	10001	*	1.16028394468694	119.615644807425	100.677024197941	333.18089491834	127.645140712979	0.0034	0	0.5961	0	Core	0	6.91427323815888	7.00725315324607	-3.27369190923451
Chr1	2640000	2650000	10001	*	3.86761314895648	82.493548143052	94.3956154091612	249.701817335936	2420.52805064163	0.003	1	0.5854	0	Core	0	6.38359281437048	11.2417019996756	-3.27928375747887
Chr1	2650000	2660000	10001	*	563.511235802959	109.121212417075	138.400373646112	283.436642227493	8.93980745623137	0.0032	0	0.5596	0	Core	0	6.78294858875176	3.31321790564766	-3.2764851241262
Chr1	2660000	2670000	10001	*	7.34846498301731	88.4456142748924	140.075415989787	315.172645744815	42.4572507019184	0.0029	1	0.5639	0	Core	0	6.48293884022792	5.44152500101789	-3.28068511265548
Chr1	2670000	2680000	10001	*	1.16028394468694	33.415108108578	96.9430756401663	267.408357622784	175.761535584439	0.003	0	0.608	0	Core	0	5.10497013680175	7.46566055919359	-3.27928375747887
Chr1	2680000	2690000	10001	*	0.773522629791296	85.4695812089722	116.206062592424	313.928096587273	36.770767671655	0.0033	0	0.5904	0	Core	0	6.43412079691843	5.23919820100685	-3.27508784068439
Chr1	2690000	2700000	10001	*	318.691323474014	101.498390879806	143.669777685588	278.590443235246	49.0732549967441	0.0028	0	0.5774	0	Core	0	6.67945745084255	5.64596833531058	-3.28208783035557
Chr1	2700000	2710000	10001	*	363.555636001909	49.1306511408936	107.761057443065	248.532695400063	517.989394107694	0.0033	0	0.5808	0	Core	0	5.64762106811868	9.0195612462296	-3.27508784068439
Chr1	2710000	2720000	10001	*	0.773522629791296	150.106930956503	107.691264012078	292.186199941122	126.442230841193	0.0033	0	0.5957	0	Core	0	7.23942602517654	6.99369961595144	-3.27508784068439
Chr1	2720000	2730000	10001	*	916.23755498779	142.066420567876	109.156926062793	254.246307441506	28.6784648978187	0.0033	0	0.5802	0	Core	0	7.16054128346713	4.8913445661729	-3.27508784068439
Chr1	2730000	2740000	10001	*	259.51684229498	53.4119618673052	100.01398660357	316.096629210263	206.873159086553	0.0036	0	0.585	0	Core	0	5.76585194175978	7.69955967691464	-3.2709040918629
Chr1	2740000	2750000	10001	*	1.54704525958259	114.34232305904	120.986912614995	295.090147975386	98.009815689876	0.003	0	0.5728	0	Core	0	6.84977817426182	6.62949965386881	-3.27928375747887
Chr1	2750000	2760000	10001	*	420.409549291569	61.4002611495121	139.063411240483	341.36474846945	145.880160814834	0.0031	0	0.5734	0	Core	0	5.96348016176844	7.19849573320496	-3.27788376218134
Chr1	2760000	2770000	10001	*	0.386761314895648	107.607090330905	107.761057443065	304.254555408196	1522.61050907446	0.0028	0	0.5822	0	Core	0	6.76297448123491	10.5732784286719	-3.28208783035557
Chr1	2770000	2780000	10001	*	713.961387297366	53.9340729315017	119.660837426253	289.451963155612	307.370811102169	0.0029	0	0.5732	0	Core	0	5.77962935525359	8.2685224029165	-3.28068511265548
Chr1	2780000	2790000	10001	*	951.81959595819	123.635900001739	120.428565167104	264.01413264767	994.505736499476	0.0029	0	0.5502	0	Core	0	6.9615758704528	9.95928581912633	-3.28068511265548
Chr1	2790000	2800000	10001	*	0.773522629791296	67.0390606428346	104.759939910648	349.454317993473	58.0677401744203	0.0033	0	0.5937	0	Core	0	6.08829131796863	5.8842985129844	-3.27508784068439
Chr1	2800000	2810000	10001	*	151.610435439094	35.9212412167214	103.643245014865	285.077184298798	32.8339717276265	0.0035	0	0.5751	0	Core	0	5.20637914914701	5.08040063812683	-3.27229732716276
Chr1	2810000	2820000	10001	*	1.16028394468694	122.330622341247	105.562564366992	264.202700701843	299.661252378447	0.0032	0	0.5643	0	Core	0	6.94638724754253	8.23199514280996	-3.2764851241262
Chr1	2820000	2830000	10001	*	0.386761314895648	99.2533133037606	112.15804359521	250.342948720124	1710.72920970544	0.0034	0	0.547	0	Core	0	6.64750610733187	10.7412387745351	-3.27369190923451
Chr1	2830000	2840000	10001	*	1.54704525958259	129.43133281432	114.810193972695	270.708298570813	182.623589625766	0.003	0	0.5576	0	Core	0	7.02714667181214	7.52060759956117	-3.27928375747887
Chr1	2840000	2850000	10001	*	564.671519747646	155.01477495995	134.282561217912	339.743063203562	80.239556220303	0.0034	0	0.5594	0	Core	0	7.28553885188848	6.34411045366819	-3.27369190923451
Chr1	2850000	2860000	10001	*	0	171.409062375721	101.723925662737	376.796685848563	93.4715648099543	0.0033	0	0.5758	0	Core	0	7.42969179889369	6.56180824982011	-3.27508784068439
Chr1	2860000	2870000	10001	*	5.41465840853907	83.1722925265074	137.667542620755	369.103109238303	49.0185772752992	0.003	0	0.5577	0	Core	0	6.39527350617163	5.64439211707915	-3.27928375747887
Chr1	2870000	2880000	10001	*	1.16028394468694	151.046730872057	155.953421539202	239.179719913081	226.529799945973	0.0031	0	0.5361	0	Core	0	7.24837098736425	7.82991169956417	-3.27788376218134
Chr1	2880000	2890000	10001	*	420.409549291569	178.927461700151	120.986912614995	232.014133854505	362.704665204347	0.0031	0	0.5386	0	Core	0	7.49127158667554	8.50662362099584	-3.27788376218134
Chr1	2890000	2900000	10001	*	0.773522629791296	270.192475721705	184.673418390122	243.780780434903	135.21800513309	0.0034	1	0.5187	0	Core	0	8.0831733410013	7.08977359943463	-3.27369190923451
Chr1	2900000	2910000	10001	*	622.298955667098	279.068363813046	139.621758688375	223.792566692561	457.652528493312	0.003	1	0.5275	0	Core	0	8.12963521728664	8.8412577829338	-3.27928375747887
Chr1	2910000	2920000	10001	*	295.098883265379	424.841772936718	163.874975956163	224.471411687584	182.295523297097	0.0032	3	0.5165	0	Core	0	8.73417366763603	7.51802774054098	-3.2764851241262
Chr1	2920000	2930000	10001	*	61.495049068408	1883.30681966331	472.047870476792	20.1390681856804	0	0.0111	5	0.2152	0	Core	0	10.87981818123	0	-3.17006927816036
Chr1	2930000	2940000	10001	*	2679.86915091194	2886.02111845275	432.57968525396	22.967588998276	0	0.008	4	0.2178	0	Core	0	11.4953659455355	0	-3.21089678249862
Chr1	2940000	2950000	10001	*	592.131573105237	3121.44099729896	363.135221422452	35.5639350170349	0.328066328669041	0.0071	9	0.2413	0	Core	0	11.6084585950995	0.409327202145864	-3.22296961479919
Chr1	2950000	2960000	10001	*	385.987792265857	2976.08527702665	390.843213524069	34.5645243299178	0	0.0089	7	0.214	0	Core	0	11.5396848320632	0	-3.19892414083254
Chr1	2960000	2970000	10001	*	2.70732920426954	3099.77338813481	370.952085692933	20.1390681856804	0	0.0096	2	0.2127	0	Core	0	11.5984123788937	0	-3.18968029658892
Chr1	2970000	2980000	10001	*	8.50874892770426	3107.91832073627	366.659789687267	25.2115488429351	0	0.0067	4	0.2183	0	Core	0	11.6021969985374	0	-3.22836791872502
Chr1	2980000	2990000	10001	*	2354.9896463996	2557.61325907313	330.890656306716	14.3688857279855	0	0.0087	3	0.1995	0	Core	0	11.3211463814795	0	-3.20157615452214
Chr1	2990000	3000000	10001	*	1821.25903184361	2928.6775923976	347.08273229557	25.079551205014	0	0.0077	4	0.2184	0	Core	0	11.5165261911383	0	-3.21490984500524
Chr1	3000000	3010000	10001	*	1084.86548828229	3497.93528569108	466.70867300633	38.67530791089	0	0.0067	3	0.2474	0	Core	0	11.772700266223	0	-3.22836791872502
Chr1	3010000	3020000	10001	*	268.025591222684	2753.30048593399	356.679329056206	20.9310540132072	0	0.0083	2	0.2148	0	Core	0	11.4274702464293	0	-3.20689485194112
Chr1	3020000	3030000	10001	*	2049.44820763204	4221.1113207097	424.204473535587	46.8403046565825	0	0.0083	6	0.2658	0	Core	0	12.0437489021247	0	-3.20689485194112
Chr1	3030000	3040000	10001	*	485.772211508934	3414.13645988754	401.137744594569	38.4490262458823	0	0.0101	3	0.2432	0	Core	0	11.7377275106357	0	-3.18311362598508
Chr1	3040000	3050000	10001	*	998.617715060563	2827.59689036916	394.856335805789	21.7041830353166	0	0.0084	5	0.2236	0	Core	0	11.4658708743678	0	-3.20556333819558
Chr1	3050000	3060000	10001	*	685.341049995088	3109.3280206096	350.363023551933	38.1661741646228	0	0.0081	3	0.2466	0	Core	0	11.6028510221729	0	-3.2095615718148
Chr1	3060000	3070000	10001	*	549.587828466716	3201.48062344029	423.47164251023	35.4319373791137	0	0.0124	2	0.2461	0	Core	0	11.6449741262513	0	-3.15328605932852
Chr1	3070000	3080000	10001	*	361.235068112535	3253.79615207278	456.379245220336	23.2127274687009	0	0.0081	3	0.226	0	Core	0	11.6683514748724	0	-3.2095615718148
Chr1	3080000	3090000	10001	*	406.09938064043	2467.02698943503	478.748039851491	31.3022969927242	0	0.0099	3	0.2183	0	Core	0	11.2691424560178	0	-3.18573670860022
Chr1	3090000	3100000	10001	*	450.963693168325	794.496406387862	322.27116757989	133.902175268274	2835.14921235785	0.004	9	0.3909	0	Core	0	9.63571160304868	11.4697177207183	-3.26534456652099
Chr1	3100000	3110000	10001	*	1.16028394468694	155.275830492048	160.280614260361	280.683548636566	346.000621302949	0.0033	0	0.5285	0	Core	0	7.28795085918365	8.43879443571913	-3.27508784068439
Chr1	3110000	3120000	10001	*	1.16028394468694	163.472974199934	170.051694598463	222.698871978357	267.128008118767	0.003	0	0.5107	0	Core	0	7.36170673306092	8.06677811802302	-3.27928375747887
Chr1	3120000	3130000	10001	*	1.16028394468694	127.864999621731	128.001152429132	241.744245449834	1546.17660701719	0.0034	0	0.5343	0	Core	0	7.00971666349083	10.5954221715107	-3.27369190923451
Chr1	3130000	3140000	10001	*	489.63982465789	152.769697383905	182.928582615461	213.213898853453	218.0274142613	0.0034	1	0.5084	0	Core	0	7.26462741647323	7.77496764381847	-3.27369190923451
Chr1	3140000	3150000	10001	*	885.683411111034	68.8664493675225	179.857671652058	204.502054750659	130.433704506666	0.0035	0	0.5226	0	Core	0	6.12652791885519	7.03819147372581	-3.27229732716276
Chr1	3150000	3160000	10001	*	0.773522629791296	115.177700761755	122.696851674163	270.180308019128	205.506216050432	0.0031	0	0.5405	0	Core	0	6.86018937308087	7.69004139868414	-3.27788376218134
Chr1	3160000	3170000	10001	*	810.651716021278	114.133478633362	133.898697347487	271.368286760418	229.427719182549	0.0036	0	0.5552	0	Core	0	6.84716359262247	7.84817046524331	-3.2709040918629
Chr1	3170000	3180000	10001	*	1.54704525958259	104.892112797083	120.812429037529	304.688261932794	53.1467452443847	0.0029	0	0.5803	0	Core	0	6.72645132629769	5.75880271506798	-3.28068511265548
Chr1	3180000	3190000	10001	*	306.701722712249	53.2031174416266	97.9899771049629	287.641709835551	349.007895982415	0.0028	0	0.5737	0	Core	0	5.76030392410926	8.45124365859284	-3.28208783035557
Chr1	3190000	3200000	10001	*	458.312158151343	127.864999621731	106.504775685309	328.994684115698	33.8455095743561	0.0028	0	0.6034	0	Core	0	7.00971666349083	5.1229008476178	-3.28208783035557
Chr1	3200000	3210000	10001	*	1.16028394468694	119.459011488166	154.452862772994	311.7784207697	34.7203531174735	0.0036	0	0.5613	0	Core	0	6.9123985147997	5.15867443733725	-3.2709040918629
Chr1	3210000	3220000	10001	*	0.386761314895648	71.2159491564069	123.324992553041	255.434286182796	109.35544288968	0.003	0	0.5616	0	Core	0	6.17424559166424	6.78601397694821	-3.27928375747887
Chr1	3220000	3230000	10001	*	1.93380657447824	111.41850109954	74.6789711554917	332.313481869144	99.6228084724988	0.0032	0	0.5924	0	Core	0	6.81273567415994	6.65281355198048	-3.2764851241262
Chr1	3230000	3240000	10001	*	1.16028394468694	62.8099610228427	90.0684226880019	290.036524123549	168.516737492997	0.0031	0	0.592	0	Core	0	5.99570974766328	7.40528391685909	-3.27788376218134
Chr1	3240000	3250000	10001	*	0.386761314895648	85.8872700603294	137.353472181316	274.253377989266	436.929672065718	0.003	0	0.5587	0	Core	0	6.4410729167356	8.77455539314329	-3.27928375747887
Chr1	3250000	3260000	10001	*	1.93380657447824	98.3135133882069	111.39031585436	301.124325708923	122.560112618609	0.0039	0	0.5959	0	Core	0	6.63391813058383	6.94906928079493	-3.26673244064524
Chr1	3260000	3270000	10001	*	10.8293168170781	70.902682517889	111.948663302251	303.519139996921	148.422674862019	0.0035	0	0.5881	0	Core	0	6.16797369007298	7.22325528320825	-3.27229732716276
Chr1	3270000	3280000	10001	*	0	54.2995506764393	106.818846124748	342.741295264913	57.8490292886409	0.003	0	0.5601	0	Core	0	5.78919585311396	5.87894671317548	-3.27928375747887
Chr1	3280000	3290000	10001	*	694.236560237688	50.9580398655815	122.068710795285	244.176773348666	1532.47983779526	0.0029	0	0.5648	0	Core	0	5.69927510054718	10.5825934828262	-3.28068511265548
Chr1	3290000	3300000	10001	*	921.652213396329	101.759446411904	96.1404511838222	263.203290014726	195.445515304581	0.0029	0	0.5752	0	Core	0	6.68312721302652	7.61798542236291	-3.28068511265548
Chr1	3300000	3310000	10001	*	0.386761314895648	72.1557490719606	116.101372445944	296.919258100865	272.103680770247	0.0026	0	0.5752	0	Core	0	6.19289934040893	8.09330494801266	-3.2848973639424
Chr1	3310000	3320000	10001	*	0.386761314895648	132.616210305919	100.607230766954	255.792565485725	63.7268843439613	0.0029	1	0.5688	0	Core	0	7.06195123582979	6.01629315569435	-3.28068511265548
Chr1	3320000	3330000	10001	*	1.93380657447824	94.084413768215	126.186523223485	331.898632149963	60.0087992857121	0.003	0	0.5734	0	Core	0	6.57113696886312	5.93094543215863	-3.27928375747887
Chr1	3330000	3340000	10001	*	1.16028394468694	96.9560246212959	85.9855069752951	296.296983522094	43.1953999414237	0.0033	0	0.6053	0	Core	0	6.61406232065207	5.46582431004567	-3.27508784068439
Chr1	3340000	3350000	10001	*	1.93380657447824	86.5138033373652	126.849560817856	288.659977328086	186.39635240546	0.0032	0	0.577	0	Core	0	6.45143868252705	7.54994906156708	-3.2764851241262
Chr1	3350000	3360000	10001	*	460.632726040717	64.5851386411109	107.970437736024	274.762511735533	160.506451301328	0.0033	0	0.6004	0	Core	0	6.03529703720409	7.33544798363847	-3.27508784068439
Chr1	3360000	3370000	10001	*	123.376859451712	92.1003917242681	95.8263807443832	323.469640128428	281.535587719482	0.0027	1	0.6266	0	Core	0	6.5407153328913	8.14228878825047	-3.28349191323125
Chr1	3370000	3380000	10001	*	283.882805133406	32.9452081508011	103.852625307824	326.637583438535	50.7956032222565	0.0028	1	0.6228	0	Core	0	5.08513602679479	5.69475773182106	-3.28208783035557
Chr1	3380000	3390000	10001	*	179.457250111581	80.7705816312034	90.8012537133595	362.748365812672	118.541300092414	0.0028	0	0.613	0	Core	0	6.35350999712004	6.90136532801961	-3.28208783035557
Chr1	3390000	3400000	10001	*	0.773522629791296	41.5078296036242	84.4500514935934	292.167343135704	341.872453333863	0.0034	0	0.6056	0	Core	0	5.40965669354865	8.42152819135065	-3.27369190923451
Chr1	3400000	3410000	10001	*	0.773522629791296	81.0838482697213	105.806841375444	330.672939797838	131.773308682065	0.003	0	0.6066	0	Core	0	6.35902646410595	7.05282134171317	-3.27928375747887
Chr1	3410000	3420000	10001	*	0.773522629791296	78.3688707358994	100.01398660357	340.139056117325	50.0301151220288	0.0034	0	0.605	0	Core	0	6.31050137378109	5.67327699127947	-3.27369190923451
Chr1	3420000	3430000	10001	*	287.363656967466	144.154864824662	279.487794385202	386.375943000554	1228.03428479039	0.0038	0	0.579	0	Core	0	7.18144911407001	10.263309445944	-3.26812165119157
Chr1	3430000	3440000	10001	*	184.098385890328	76.1760042662739	93.9419581077493	380.568046932024	30.5375074269432	0.0032	0	0.6002	0	Core	0	6.27008044617184	4.97899673583727	-3.2764851241262
Chr1	3440000	3450000	10001	*	0.386761314895648	122.173989021988	99.5254325866646	313.909239781855	99.1580478402177	0.0033	0	0.596	0	Core	0	6.94455382023181	6.64613453816145	-3.27508784068439
Chr1	3450000	3460000	10001	*	0.386761314895648	68.8664493675225	103.189587713453	295.90099060833	72.3933031929684	0.0035	0	0.6154	0	Core	0	6.12652791885519	6.19757652456263	-3.27229732716276
Chr1	3460000	3470000	10001	*	1.54704525958259	82.9112369944092	102.701033696548	317.51088961656	140.330372088182	0.003	0	0.5885	0	Core	0	6.39079211735905	7.14292772588131	-3.27928375747887
Chr1	3470000	3480000	10001	*	0.773522629791296	67.9788605583884	110.657484829002	290.055380928966	34.5836588138614	0.0033	0	0.6036	0	Core	0	6.10808239242577	5.15314295516152	-3.27508784068439
Chr1	3480000	3490000	10001	*	1.16028394468694	101.237335347707	113.274738490993	304.461980267786	47.5969565177334	0.0035	0	0.5976	0	Core	0	6.6757783301282	5.60279405986529	-3.27229732716276
Chr1	3490000	3500000	10001	*	1.93380657447824	103.79567956227	113.2398417755	311.646423131779	190.825247842492	0.0039	0	0.5697	0	Core	0	6.71143542952631	7.58364880867063	-3.26673244064524
Chr1	3500000	3510000	10001	*	2.70732920426954	114.34232305904	143.599984254602	313.701814922265	171.305301286684	0.0035	0	0.5727	0	Core	0	6.84977817426182	7.4288232791632	-3.27229732716276
Chr1	3510000	3520000	10001	*	2.32056788937389	80.3528927798462	149.253252164504	297.730100733809	270.162621658955	0.0028	0	0.5619	0	Core	0	6.34612174164488	8.08301451403155	-3.28208783035557
Chr1	3520000	3530000	10001	*	0.773522629791296	58.8941280413687	106.469878969815	286.887437618859	45.2731533563277	0.0026	0	0.5916	0	Core	0	5.90434266449825	5.5321035118481	-3.2848973639424
Chr1	3530000	3540000	10001	*	1.54704525958259	105.466434967699	104.096902316276	286.057738180498	52.7093234728259	0.0036	0	0.5989	0	Core	0	6.73425486212224	5.74710064418669	-3.2709040918629
Chr1	3540000	3550000	10001	*	653.239860858749	105.623068286958	127.512598412227	265.69238832981	265.92509824698	0.0029	0	0.5562	0	Core	0	6.73637579393896	8.06029115435568	-3.28068511265548
Chr1	3550000	3560000	10001	*	0.773522629791296	62.3400610650658	157.55867045189	259.88449226128	1064.30184792381	0.0032	0	0.5621	0	Core	0	5.98504635313167	10.0570465534251	-3.2764851241262
Chr1	3560000	3570000	10001	*	469.141474968421	120.659866935818	110.448104536043	248.890974702992	6.58866543410324	0.0029	3	0.5709	0	Core	0	6.92670952116583	2.92384619118858	-3.28068511265548
Chr1	3570000	3580000	10001	*	0.773522629791296	78.3166596294797	105.353184074032	306.724796917863	75.5099333153243	0.0032	0	0.598	0	Core	0	6.3095520155522	6.2575751605284	-3.2764851241262
Chr1	3580000	3590000	10001	*	650.145770339584	51.2190953976797	146.670895218005	341.477889301953	17.5515485837937	0.003	0	0.5581	0	Core	0	5.7065055606464	4.21346771520569	-3.27928375747887
Chr1	3590000	3600000	10001	*	95.1432834643294	78.0556040973814	135.643533122148	291.281073281091	247.908789030905	0.003	0	0.6006	0	Core	0	6.30479583092995	7.95947336291181	-3.27928375747887
Chr1	3600000	3610000	10001	*	730.978885152775	90.4296363188392	151.765815680016	223.17029211379	31.5217064129504	0.0031	0	0.5383	0	Core	0	6.5145899761434	5.02333105245141	-3.27788376218134
Chr1	3610000	3620000	10001	*	388.695121470126	126.194244216302	188.861024249309	227.677068608525	60.4735599179932	0.003	0	0.5559	0	Core	0	6.99088957715424	5.94189412847441	-3.27928375747887
Chr1	3620000	3630000	10001	*	0.386761314895648	122.435044554087	130.618406091124	280.928687106991	216.633132364457	0.0028	0	0.5817	0	Core	0	6.94760823925916	7.76575439828942	-3.28208783035557
Chr1	3630000	3640000	10001	*	377.479043338152	73.0955489875144	114.879987403682	253.944598554829	365.083146087198	0.0026	0	0.5671	0	Core	0	6.21131497552227	8.51602754545454	-3.2848973639424
Chr1	3640000	3650000	10001	*	989.722204817963	135.43561005258	129.117847324915	266.729512627761	97.1076332860362	0.0027	0	0.5771	0	Core	0	7.09207643048027	6.6162934849046	-3.28349191323125
Chr1	3650000	3660000	10001	*	806.397341557426	89.9075252546427	148.276144130693	268.520909142405	199.16360036283	0.0041	0	0.5576	0	Core	0	6.50632781942984	7.64503583452542	-3.26395802625003
Chr1	3660000	3670000	10001	*	755.731609306096	81.3971149082392	127.931358998146	310.609298833827	139.674239430844	0.003	0	0.5614	0	Core	0	6.36452191797006	7.13621435311819	-3.27928375747887
Chr1	3670000	3680000	10001	*	1.16028394468694	43.3352183283121	144.960956158838	248.419554567559	191.836785689222	0.0031	0	0.5464	0	Core	0	5.47038127497016	7.59123647717874	-3.27788376218134
Chr1	3680000	3690000	10001	*	15.8572139107216	92.3614472563664	130.234542220699	265.579247497306	1073.24165538005	0.0033	0	0.5708	0	Core	0	6.54475502025781	10.0691028550822	-3.27508784068439
Chr1	3690000	3700000	10001	*	0.773522629791296	113.663578675585	162.095243466009	264.202700701843	182.240845575652	0.0028	0	0.5538	0	Core	0	6.84126340145703	7.51759731515971	-3.28208783035557
Chr1	3700000	3710000	10001	*	19.724827059678	79.8307817156496	274.497564069672	267.747780120296	385.423258464678	0.0028	0	0.5705	0	Core	0	6.33683289493955	8.5940381210649	-3.28208783035557
Chr1	3710000	3720000	10001	*	2.32056788937389	162.5853853908	653.510791041539	233.52267828789	5.63180530881854	0.0031	1	0.5356	0	Core	0	7.35390005439899	2.72940165398009	-3.27788376218134
Chr1	3720000	3730000	10001	*	68.4567527365297	287.004451988833	902.778029809612	238.953438248073	47.4876010748437	0.0043	2	0.5199	0	Core	0	8.16994730287484	5.59954397301757	-3.26118893702968
Chr1	3730000	3740000	10001	*	186.032192464807	758.940642916078	636.585884027327	145.065404075318	0	0.0041	5	0.3857	0	Core	0	9.56974292739033	0	-3.26395802625003
Chr1	3740000	3750000	10001	*	1752.80227910708	1429.38346045084	742.078654963332	18.3853852818711	0	0.0273	5	0.2122	0	Core	0	10.4821862444842	0	-2.97369567564809
Chr1	3750000	3760000	10001	*	152.383958068885	1038.63554000616	543.621033953387	133.864461657439	22.1991549066051	0.0053	4	0.3603	0	Core	0	10.0218621430483	4.53600034703951	-3.24742265852373
Chr1	3760000	3770000	10001	*	216.586336341563	589.515602584304	522.19445064055	168.579840430695	0.0273388607224201	0.0043	5	0.3869	0	Core	0	9.20583136874283	0.0389121232814827	-3.26118893702968
Chr1	3770000	3780000	10001	*	388.695121470126	257.505176861729	313.337608413626	198.637588265878	0	0.0026	3	0.5178	0	Core	0	8.01404936222194	0	-3.2848973639424
Chr1	3780000	3790000	10001	*	159.345661737007	290.45038501253	436.906877975119	208.895690412891	1.2302487325089	0.0031	3	0.4988	0	Core	0	8.18710649725308	1.15720461828277	-3.27788376218134
Chr1	3790000	3800000	10001	*	1218.68490323619	135.696665584679	118.299865522017	445.303459929628	0.956860125284703	0.0035	0	0.5752	0	Core	0	7.09483424176684	0.968540637022429	-3.27229732716276
Chr1	3800000	3810000	10001	*	888.777501630199	78.5255040551583	114.914884119175	309.591031341293	77.1229260979471	0.0031	0	0.581	0	Core	0	6.31334570589073	6.28767408133607	-3.27788376218134
Chr1	3810000	3820000	10001	*	536.437943760264	81.7625926531768	126.291213369965	278.13787990523	215.047478442556	0.0028	0	0.5817	0	Core	0	6.37090693521933	7.75520458265725	-3.28208783035557
Chr1	3820000	3830000	10001	*	713.961387297366	106.87613484103	92.9648500739392	276.893330747688	16.594688458509	0.0039	0	0.5715	0	Core	0	6.75323192619786	4.13706806402789	-3.26673244064524
Chr1	3830000	3840000	10001	*	482.678120989769	100.663013177091	114.810193972695	425.126678133113	32.9433271705162	0.003	0	0.5764	0	Core	0	6.66765108616186	5.08505608160472	-3.27928375747887
Chr1	3840000	3850000	10001	*	0	92.3614472563664	92.5460894880205	272.216843004197	50.9322975258686	0.0037	0	0.5957	0	Core	0	6.54475502025781	5.69856014769329	-3.26951220073622
Chr1	3850000	3860000	10001	*	0.773522629791296	121.234189106435	106.993329702214	285.190325131302	126.770297169862	0.0032	0	0.5695	0	Core	0	6.93350405558273	6.99740868094005	-3.2764851241262
Chr1	3860000	3870000	10001	*	840.432337268243	95.7029580672242	124.197410440371	265.862099578565	257.149323955083	0.003	0	0.5536	0	Core	0	6.595488116168	8.0120620097298	-3.27928375747887
Chr1	3870000	3880000	10001	*	1506.82208283344	102.699246327458	152.742923713826	260.16734434254	240.253908028628	0.0029	0	0.5564	0	Core	0	6.69626159864534	7.91440850230199	-3.28068511265548
Chr1	3880000	3890000	10001	*	69.6170366812166	54.5606062085375	103.643245014865	392.315836707004	5610.15293112638	0.0029	0	0.5891	0	Core	0	5.79599043519442	12.4540815184416	-3.28068511265548
Chr1	3890000	3900000	10001	*	1.16028394468694	83.9032480163826	110.622588113509	279.32585864652	73.6508907861997	0.003	0	0.5973	0	Core	0	6.40774784074455	6.22208757058764	-3.27928375747887
Chr1	3900000	3910000	10001	*	0.386761314895648	38.7928520698023	126.395903516444	234.22038008833	274.50950051382	0.0033	0	0.5564	0	Core	0	5.31443739978736	8.10595825850891	-3.27508784068439
Chr1	3910000	3920000	10001	*	452.123977113012	182.216761404589	140.040519274293	276.025917698492	267.0459915366	0.0031	0	0.5506	0	Core	0	7.51740768277907	8.06633675041712	-3.27788376218134
Chr1	3920000	3930000	10001	*	485.772211508934	120.294389190881	117.950898367085	263.335287652647	161.326617123001	0.0025	0	0.573	0	Core	0	6.92236900590743	7.34275577156374	-3.28630418515664
Chr1	3930000	3940000	10001	*	1.16028394468694	38.7406409633826	142.134322203887	306.969935388288	214.391345785218	0.003	0	0.589	0	Core	0	5.31254323640389	7.75081647473776	-3.27928375747887
Chr1	3940000	3950000	10001	*	45.2510738427908	58.2153836579133	134.945598812283	248.174416097135	68.7025569954417	0.0034	0	0.5702	0	Core	0	5.88790011945501	6.12313967633226	-3.27369190923451
Chr1	3950000	3960000	10001	*	327.973595031509	100.245324325734	117.916001651592	285.812599710073	91.0930839271038	0.0036	0	0.5731	0	Core	0	6.66171147329955	6.52502091071842	-3.2709040918629
Chr1	3960000	3970000	10001	*	1.54704525958259	68.187704984067	97.2920427950985	303.330571942748	129.640877545716	0.0036	0	0.5931	0	Core	0	6.11244378109496	7.0294625767438	-3.2709040918629
Chr1	3970000	3980000	10001	*	0.386761314895648	76.5936931176311	126.57038709391	344.061271644124	24.5229580680108	0.0028	0	0.5644	0	Core	0	6.27786748856664	4.67372363961464	-3.28208783035557
Chr1	3980000	3990000	10001	*	775.84319768067	48.5563289702774	143.216120384177	258.960508795832	645.771229124285	0.003	0	0.5702	0	Core	0	5.63099741447775	9.33711169338081	-3.27928375747887
Chr1	3990000	4000000	10001	*	323.719220567657	70.589415879371	115.647715144532	253.718316889822	43.277416523591	0.0032	0	0.5798	0	Core	0	6.16167440322805	5.46849914181855	-3.2764851241262
Chr1	4000000	4010000	10001	*	201.502645060633	79.0476151193549	114.496123533256	340.044772090238	180.108414439304	0.0029	0	0.5562	0	Core	0	6.32278651565846	7.50070976636566	-3.28068511265548
Chr1	4010000	4020000	10001	*	420.796310606465	52.9942730159479	111.878869871265	367.424853556163	65.5585880123634	0.0039	0	0.6059	0	Core	0	5.7547344886514	6.05655292306035	-3.26673244064524
Chr1	4020000	4030000	10001	*	1.54704525958259	133.451588008633	112.576804181129	290.86622356191	60.4462210572708	0.0034	0	0.5839	0	Core	0	7.07094298476722	5.94125238246534	-3.27369190923451
Chr1	4030000	4040000	10001	*	0.386761314895648	71.5814269013445	121.440569916407	278.062452683561	3561.95282466339	0.0027	0	0.56	0	Core	0	6.18152851438384	11.7988576662319	-3.28349191323125
Chr1	4040000	4050000	10001	*	1.16028394468694	90.7429029573572	128.419913015051	342.835579291999	1110.55920026615	0.0032	0	0.5829	0	Core	0	6.51952465323292	10.118369071224	-3.2764851241262
Chr1	4050000	4060000	10001	*	0.386761314895648	47.5121068418844	117.148273910741	324.99704136723	175.597502420104	0.0039	0	0.589	0	Core	0	5.60027293086898	7.46432112918461	-3.26673244064524
Chr1	4060000	4070000	10001	*	0.386761314895648	117.37056723138	105.318287358539	268.539765947823	218.792902361528	0.0029	0	0.5933	0	Core	0	6.88716659009946	7.78000098874087	-3.28068511265548
Chr1	4070000	4080000	10001	*	0	62.3922721714855	129.048053893929	317.265751146135	665.564564287317	0.0033	0	0.5676	0	Core	0	5.98623507437823	9.38060081312474	-3.27508784068439
Chr1	4080000	4090000	10001	*	0.773522629791296	84.7908368255167	138.539960508085	363.785490110624	354.202279519675	0.003	0	0.5652	0	Core	0	6.42275165901841	8.47249703002462	-3.27928375747887
Chr1	4090000	4100000	10001	*	1.16028394468694	114.185689739781	131.839791133387	303.387142359	64.8477776335805	0.003	0	0.5434	0	Core	0	6.84781768238959	6.04106284514718	-3.27928375747887
Chr1	4100000	4110000	10001	*	1.93380657447824	128.595955111606	108.319404890956	284.492623330862	37.0988340003241	0.0042	0	0.5762	0	Core	0	7.01787687997647	5.25167494017312	-3.26257281727094
Chr1	4110000	4120000	10001	*	1.16028394468694	43.3352183283121	121.964020648805	258.564515882069	55.4978872665128	0.0031	0	0.579	0	Core	0	5.47038127497016	5.82012501397069	-3.27788376218134
Chr1	4120000	4130000	10001	*	12.7631233915564	119.563433701006	164.154149680109	237.369466593019	586.117835027964	0.0027	0	0.5593	0	Core	0	6.91364860101412	9.19750627224085	-3.28349191323125
Chr1	4130000	4140000	10001	*	0	87.9235032106959	128.245429437585	342.364159156567	2003.93849095339	0.0031	0	0.5875	0	Core	0	6.47449288046709	10.969342261912	-3.27788376218134
Chr1	4140000	4150000	10001	*	415.381652197926	106.458445989673	128.524603161531	267.050078319856	224.096641341678	0.0028	0	0.5699	0	Core	0	6.74763506954877	7.81440072033021	-3.28208783035557
Chr1	4150000	4160000	10001	*	939.443233881529	106.562868202512	132.712209020717	313.758385338517	185.794897469567	0.0034	1	0.551	0	Core	0	6.74903632059248	7.54531123638604	-3.27369190923451
Chr1	4160000	4170000	10001	*	0.773522629791296	109.016790204236	96.9779723556595	332.275768258309	119.962920849979	0.003	0	0.5633	0	Core	0	6.78157990712362	6.9184210711271	-3.27928375747887
Chr1	4170000	4180000	10001	*	267.252068592893	77.1680152882473	157.384186874424	308.780188708349	336.459358910824	0.0032	0	0.573	0	Core	0	6.28850650262001	8.39856995496542	-3.2764851241262
Chr1	4180000	4190000	10001	*	1.93380657447824	121.704089064211	167.225060643512	239.066579080577	196.976491505037	0.0035	1	0.5319	0	Core	0	6.93903951680621	7.62918531905609	-3.27229732716276
Chr1	4190000	4200000	10001	*	1.16028394468694	101.550601986225	153.754928463129	216.193274109387	86.8555605151286	0.003	0	0.54	0	Core	0	6.68019215043689	6.4570616944247	-3.27928375747887
Chr1	4200000	4210000	10001	*	1.93380657447824	130.162288304195	148.136557268721	294.430159785781	444.63923078944	0.0032	0	0.5549	0	Core	0	7.0352091666116	8.79973243226879	-3.2764851241262
Chr1	4210000	4220000	10001	*	16.6307365405129	96.0684358121618	109.645480079699	253.265753559807	326.9180965187	0.0027	0	0.5628	0	Core	0	6.60093033903564	8.35719171040591	-3.28349191323125
Chr1	4220000	4230000	10001	*	1.16028394468694	132.981688050857	143.006740091217	275.743065617233	944.28424935239	0.0032	0	0.551	0	Core	0	7.06589202356587	9.88460440637624	-3.2764851241262
Chr1	4230000	4240000	10001	*	0.386761314895648	190.466116218895	171.622046795658	246.156737917483	229.126991714603	0.0026	0	0.5298	0	Core	0	7.5809452906027	7.84628639771317	-3.2848973639424
Chr1	4240000	4250000	10001	*	1.16028394468694	117.47498944422	100.99109463738	316.436051707774	103.231538087858	0.0028	0	0.5891	0	Core	0	6.88843872220527	6.70364806008453	-3.28208783035557
Chr1	4250000	4260000	10001	*	266.865307277997	450.686270614446	458.891808735848	210.234523597519	8.28367479889329	0.0043	7	0.4599	0	Core	0	8.81917725228276	3.21469598689597	-3.26118893702968
Chr1	4260000	4270000	10001	*	106.359361596303	843.157157570978	553.217630714023	157.473182039904	23.0466595890001	0.0237	5	0.4226	0	Core	0	9.72136780167124	4.58776459266253	-3.01508259457308
Chr1	4270000	4280000	10001	*	122.216575507025	956.872947352983	590.766496584728	128.942835443523	0	0.0275	5	0.3785	0	Core	0	9.90369049878459	0	-2.97143084780323
Chr1	4280000	4290000	10001	*	336.482343959214	435.962738604104	342.999816582863	183.23157823994	180.217769882193	0.0082	4	0.473	0	Core	0	8.77136645091243	7.50158062012544	-3.20822759572263
Chr1	4290000	4300000	10001	*	438.587331091665	114.864434123237	138.121199922166	345.305820801666	7899.53646688256	0.0032	0	0.5719	0	Core	0	6.85629397278501	12.9477349040067	-3.2764851241262
Chr1	4300000	4310000	10001	*	421.183071921361	84.1120924420612	126.954250964336	353.433103936524	8.17431935600361	0.0031	0	0.5697	0	Core	0	6.41129221465784	3.19760112818547	-3.27788376218134
Chr1	4310000	4320000	10001	*	2.32056788937389	101.916079731163	133.898697347487	311.816134380535	161.955410919617	0.0031	0	0.5612	0	Core	0	6.68532459801302	7.34833344720433	-3.27788376218134
Chr1	4320000	4330000	10001	*	305.154677452666	112.358301015094	112.018456733237	287.99998913848	359.205291031878	0.0034	0	0.5738	0	Core	0	6.82474623056507	8.49267556282732	-3.27369190923451
Chr1	4330000	4340000	10001	*	0.773522629791296	67.4045383877722	93.3138172288714	334.972291432984	37.3175448861034	0.0033	0	0.6218	0	Core	0	6.09602014064658	5.25993322135516	-3.27508784068439
Chr1	4340000	4350000	10001	*	1.16028394468694	128.857010643704	114.391433386776	244.723620705768	70.0695000315627	0.0035	0	0.5509	0	Core	0	7.02078009326259	6.15115864497431	-3.27229732716276
Chr1	4350000	4360000	10001	*	0.773522629791296	69.8584603894959	119.311870271321	302.519729309804	19.1372025056941	0.0029	0	0.5745	0	Core	0	6.14686821384952	4.33179137051169	-3.28068511265548
Chr1	4360000	4370000	10001	*	49.8922096215386	112.410512121513	133.8289039165	239.274003940167	1501.50490859676	0.0031	0	0.5594	0	Core	0	6.82541056094278	10.5531539888076	-3.27788376218134
Chr1	4370000	4380000	10001	*	1.16028394468694	106.458445989673	125.349002051648	302.764867780229	218.437497172137	0.0034	0	0.5693	0	Core	0	6.74763506954877	7.77766626228893	-3.27369190923451
Chr1	4380000	4390000	10001	*	1.16028394468694	80.1962594605872	116.206062592424	259.752494623359	602.985912093698	0.0032	0	0.5825	0	Core	0	6.34334136192884	9.23837108901119	-3.2764851241262
Chr1	4390000	4400000	10001	*	9.6690328723912	130.94545490049	117.3576542037	307.422498718303	5982.04345353346	0.0031	0	0.5657	0	Core	0	7.04379784505839	12.5466638256709	-3.27788376218134
Chr1	4400000	4410000	10001	*	0.386761314895648	140.186820736769	107.830850874051	305.121968457392	2266.3642150279	0.0026	0	0.5878	0	Core	0	7.14146161446664	11.1468004397504	-3.2848973639424
Chr1	4410000	4420000	10001	*	1.16028394468694	393.723953510604	359.750240019609	214.100168708067	55.3338541021783	0.0055	5	0.4659	0	Core	0	8.6247002604686	5.81593027237447	-3.2446850959549
Chr1	4420000	4430000	10001	*	3.09409051916518	1984.07425505324	705.192826686998	62.4348827366927	0	0.0345	5	0.3179	0	Core	0	10.9549772594829	0	-2.89432192210546
Chr1	4430000	4440000	10001	*	560.417145283794	2471.88262233206	654.418105644362	53.4401865526388	0	0.0367	8	0.2997	0	Core	0	11.2719780471565	0	-2.87091485194339
Chr1	4440000	4450000	10001	*	562.350951858272	2188.95063664396	672.250327261398	39.3164392950783	0	0.0397	3	0.2746	0	Core	0	11.0966826352778	0	-2.83959607413999
Chr1	4450000	4460000	10001	*	268.799113852475	1863.15333258532	666.946026506428	63.9622839754943	0	0.0375	4	0.3244	0	Core	0	10.8643048158251	0	-2.86249647625006
Chr1	4460000	4470000	10001	*	0.773522629791296	502.636321502001	275.090808233056	288.113129970984	48.1437337321818	0.004	3	0.5094	0	Core	0	8.97623852160297	5.61893556659376	-3.26534456652099
Chr1	4470000	4480000	10001	*	3.86761314895648	115.490967400273	117.3576542037	311.7784207697	179.342926339076	0.0034	0	0.5852	0	Core	0	6.86407428377843	7.49459902661979	-3.27369190923451
Chr1	4480000	4490000	10001	*	1.16028394468694	77.063593075408	113.693499076912	371.479066720884	135.682765765371	0.0036	0	0.5932	0	Core	0	6.28657796290089	7.09468753577434	-3.2709040918629
Chr1	4490000	4500000	10001	*	1647.21644014056	72.5212268168982	96.1404511838222	348.2851960576	43.6328217129825	0.0027	0	0.5944	0	Core	0	6.20008893534304	5.48003311238106	-3.28349191323125
Chr1	4500000	4510000	10001	*	380.186372542422	79.621937289971	88.0444131893951	304.85797318155	112.034651240478	0.0027	0	0.6136	0	Core	0	6.33310054546725	6.82062129435779	-3.28349191323125
Chr1	4510000	4520000	10001	*	412.674322993656	63.3842831934589	119.835321003719	304.876829986967	351.605087751045	0.0031	0	0.601	0	Core	0	6.00863665083337	8.4619094812798	-3.27788376218134
Chr1	4520000	4530000	10001	*	0.386761314895648	79.77857060923	124.127617009385	292.148486330287	195.746242772528	0.0031	0	0.573	0	Core	0	6.3359007124161	7.62019227488386	-3.27788376218134
Chr1	4530000	4540000	10001	*	1.16028394468694	110.061012332629	116.659719893836	297.183253376707	448.029249519021	0.0033	0	0.5911	0	Core	0	6.79520864119164	8.81066561416571	-3.27508784068439
Chr1	4540000	4550000	10001	*	0.773522629791296	51.9500508875549	113.937776085365	292.714190492806	289.98329568271	0.0035	0	0.5701	0	Core	0	5.72656016560522	8.18479252528826	-3.27229732716276
Chr1	4550000	4560000	10001	*	1.16028394468694	93.0401916398219	106.714155978268	264.051846258504	188.501444681087	0.0037	0	0.5824	0	Core	0	6.55520557387765	7.56606503672674	-3.26951220073622
Chr1	4560000	4570000	10001	*	56.080390659869	73.5132378388716	96.6639019162205	279.778421976536	361.693127357618	0.0036	0	0.5875	0	Core	0	6.21942484889069	8.50260559783168	-3.2709040918629
Chr1	4570000	4580000	10001	*	0.386761314895648	77.5857041396046	95.5821037359307	317.001755870293	25.2337684467937	0.003	0	0.6236	0	Core	0	6.29619498443568	4.71335315864709	-3.27928375747887
Chr1	4580000	4590000	10001	*	0	100.506379857832	115.857095437492	309.723028979214	344.633678266828	0.0037	0	0.5682	0	Core	0	6.66542659600291	8.43309998916644	-3.26951220073622
Chr1	4590000	4600000	10001	*	215.426052396876	69.9628826023352	102.561446834575	287.057148867615	67.937068895214	0.0037	0	0.572	0	Core	0	6.14899270981984	6.10720805358331	-3.26951220073622
Chr1	4600000	4610000	10001	*	240.565537865093	58.3198058707526	141.680664902475	256.980544227015	63.0434128259007	0.0028	0	0.5737	0	Core	0	5.89044197134206	6.0009782849372	-3.28208783035557
Chr1	4610000	4620000	10001	*	0.386761314895648	93.5623027040184	174.23930045765	276.214485752665	1028.07785746661	0.0029	0	0.5457	0	Core	0	6.56319326216274	10.0071364217353	-3.28068511265548
Chr1	4620000	4630000	10001	*	1.54704525958259	70.7982603050497	119.172283409348	275.177361454713	655.121119491353	0.0035	0	0.5943	0	Core	0	6.16587698239412	9.35781834967942	-3.27229732716276
Chr1	4630000	4640000	10001	*	0.386761314895648	102.124924156842	120.184288158651	276.440767417673	124.282460844122	0.0026	0	0.5859	0	Core	0	6.68824924810444	6.96904064574064	-3.2848973639424
Chr1	4640000	4650000	10001	*	0.773522629791296	127.186255238275	126.221419938978	267.446071233619	1244.95703957757	0.0033	0	0.5854	0	Core	0	7.00209776715533	10.2830386099607	-3.27508784068439
Chr1	4650000	4660000	10001	*	448.643125278952	81.8670148660161	131.316340400988	355.620493364931	66.8708533270396	0.0033	0	0.5788	0	Core	0	6.37272604752465	6.0847202468502	-3.27508784068439
Chr1	4660000	4670000	10001	*	350.018989980561	67.6133828134508	86.6136478541731	278.401875181072	300.454079339397	0.0034	0	0.6116	0	Core	0	6.10041809162892	8.23579444213232	-3.27369190923451
Chr1	4670000	4680000	10001	*	1.54704525958259	132.616210305919	108.703268761382	266.408946935667	43.0040279163668	0.0032	0	0.5763	0	Core	0	7.06195123582979	5.45956368202369	-3.2764851241262
Chr1	4680000	4690000	10001	*	0.386761314895648	79.4130928642924	111.1809355614	296.919258100865	8.80311315261927	0.0028	0	0.5782	0	Core	0	6.32935851510434	3.29323997541347	-3.28208783035557
Chr1	4690000	4700000	10001	*	1.16028394468694	106.092968244735	431.288506780711	231.919849827419	2.43315860429539	0.0027	0	0.5445	0	Core	0	6.74271994519909	1.77953650813843	-3.28349191323125
Chr1	4700000	4710000	10001	*	0.386761314895648	89.1765697647676	119.52125056428	294.656441450788	682.159252745826	0.0029	0	0.5736	0	Core	0	6.49468072709077	9.41607811728781	-3.28068511265548
Chr1	4710000	4720000	10001	*	611.082877535124	112.410512121513	102.596343550068	275.441356730556	266.581230904318	0.0031	0	0.5654	0	Core	0	6.82541056094278	8.06383311356084	-3.27788376218134
Chr1	4720000	4730000	10001	*	532.570330611307	128.543744005186	135.99250027708	310.062451476725	139.865611455901	0.0038	0	0.5624	0	Core	0	7.01729553558511	7.13817564927692	-3.26812165119157
Chr1	4730000	4740000	10001	*	446.322557389578	153.082964022423	135.678429837641	304.254555408196	298.56769794955	0.0034	1	0.5662	0	Core	0	7.26756355079019	8.22673825776222	-3.27369190923451
Chr1	4740000	4750000	10001	*	0.773522629791296	89.1243586583479	133.759110485514	250.701228023053	8.50238568467265	0.003	0	0.5702	0	Core	0	6.49384518279186	3.24828976432319	-3.27928375747887
Chr1	4750000	4760000	10001	*	2.32056788937389	129.535755027159	118.962903116388	310.741296471748	1053.12025388834	0.0035	0	0.5807	0	Core	0	7.02830121906105	10.0418237434704	-3.27229732716276
Chr1	4760000	4770000	10001	*	771.202061901922	66.1514718337005	124.127617009385	254.057739387333	23.4020647783916	0.0036	0	0.5661	0	Core	0	6.06934711604284	4.60893132134418	-3.2709040918629
Chr1	4770000	4780000	10001	*	16.6307365405129	71.4247935820855	129.676194772807	340.836757917765	113.264899972986	0.0027	0	0.5787	0	Core	0	6.17841176256356	6.83623849261208	-3.28349191323125
Chr1	4780000	4790000	10001	*	0.386761314895648	14.6713209039225	137.004505026383	281.475534464093	294.794935169856	0.0033	0	0.5656	0	Core	0	3.97005488166812	8.2084535394805	-3.27508784068439
Chr1	4790000	4800000	10001	*	621.138671722411	78.577715161578	99.5254325866646	315.62520907483	241.128751571745	0.0037	0	0.5951	0	Core	0	6.3142925717981	7.9196305920654	-3.26951220073622
Chr1	4800000	4810000	10001	*	1.16028394468694	120.085544765202	94.7794792795866	273.235110496731	214.828767556777	0.0034	0	0.605	0	Core	0	6.91988283564663	7.75374336250356	-3.27369190923451
Chr1	4810000	4820000	10001	*	1.93380657447824	122.904944511863	158.465985054714	298.880365864264	351.823798636824	0.0064	1	0.5552	0	Core	0	6.95308995013791	8.46280406647897	-3.23242994404826
Chr1	4820000	4830000	10001	*	569.699416841289	76.4370597983722	130.199645505205	271.500284398339	144.294506892933	0.0031	0	0.565	0	Core	0	6.27495227096532	7.18283635022566	-3.27788376218134
Chr1	4830000	4840000	10001	*	0.386761314895648	98.5745689203051	113.484118783953	263.561569317654	182.21350671493	0.0036	0	0.5899	0	Core	0	6.63770542375366	7.51738205430326	-3.2709040918629
Chr1	4840000	4850000	10001	*	0.386761314895648	72.6778601361572	106.644362547282	335.198573097991	48.3077668965163	0.0033	0	0.5966	0	Core	0	6.2031592559938	5.62374301087232	-3.27508784068439
Chr1	4850000	4860000	10001	*	0.773522629791296	104.683268371405	123.010922113602	333.67117185919	14.6536293472172	0.0024	0	0.5588	0	Core	0	6.72360317909421	3.96842528458123	-3.28771237954945
Chr1	4860000	4870000	10001	*	2.32056788937389	136.427621074554	164.189046395602	251.191504963903	120.099615153591	0.0027	0	0.5487	0	Core	0	7.10252818506963	6.92005047002672	-3.28349191323125
Chr1	4870000	4880000	10001	*	1169.17945492954	124.523488810873	207.844837477621	235.540356467541	119.142755028307	0.0036	1	0.5625	0	Core	0	6.97181354614331	6.90860584198883	-3.2709040918629
Chr1	4880000	4890000	10001	*	40.2231767491474	559.859694137941	536.292723699811	81.6688242623425	102.57540543052	0.0087	1	0.3088	0	Core	0	9.1314960980633	6.69453765731807	-3.20157615452214
Chr1	4890000	4900000	10001	*	2.32056788937389	84.4775701869988	110.657484829002	322.055379722131	298.649714531717	0.0031	0	0.5689	0	Core	0	6.41747399295305	8.22713318926668	-3.27788376218134
Chr1	4900000	4910000	10001	*	4.25437446385213	110.113223439048	117.916001651592	372.912183932599	20.4768066810927	0.003	0	0.5712	0	Core	0	6.79588670996443	4.42470759436368	-3.27928375747887
Chr1	4910000	4920000	10001	*	1183.87638489558	79.621937289971	124.581274310797	342.043593464473	125.157304387239	0.0028	0	0.5636	0	Core	0	6.33310054546725	6.97907992916996	-3.28208783035557
Chr1	4920000	4930000	10001	*	1.16028394468694	26.2621865290855	119.730630857239	308.780188708349	163.45904825935	0.0041	0	0.5808	0	Core	0	4.76882937119644	7.3615845747786	-3.26395802625003
Chr1	4930000	4940000	10001	*	1031.1056655118	55.6048283369306	115.2987479896	287.698280251803	162.119444083951	0.0032	0	0.6128	0	Core	0	5.82285321368036	7.34978495350148	-3.2764851241262
Chr1	4940000	4950000	10001	*	513.232264866525	101.968290837583	117.741518074126	283.153790146233	27.7489436332564	0.0024	0	0.5727	0	Core	0	6.68605631655695	4.84543704075093	-3.28771237954945
Chr1	4950000	4960000	10001	*	0.773522629791296	92.2048139371074	129.187640755902	284.775475412121	99.1580478402177	0.0028	0	0.5736	0	Core	0	6.54233256547332	6.64613453816145	-3.28208783035557
Chr1	4960000	4970000	10001	*	1.93380657447824	132.563999199499	131.7699977024	372.176768521324	42.429911841196	0.003	0	0.5649	0	Core	0	7.06138738639341	5.44061711914133	-3.27928375747887
Chr1	4970000	4980000	10001	*	0.773522629791296	128.387110685927	142.971843375724	302.444302088135	120.837764393097	0.0035	0	0.5454	0	Core	0	7.01555009554656	6.92881756487587	-3.27229732716276
Chr1	4980000	4990000	10001	*	542.239363483698	77.9511818845421	115.089367696641	281.965811404943	130.597737671001	0.0031	0	0.5769	0	Core	0	6.30288895801157	7.03999087733661	-3.27788376218134
Chr1	4990000	5000000	10001	*	551.521635041194	74.661882180104	120.428565167104	391.222141992801	72.7487083823599	0.0036	0	0.5861	0	Core	0	6.24149476049124	6.20454587744674	-3.2709040918629
Chr1	5000000	5010000	10001	*	1099.17565693343	101.446179773386	98.0597705359494	320.773116953754	49.455999046858	0.0028	0	0.5961	0	Core	0	6.67872237690816	5.65695390595574	-3.28208783035557
Chr1	5010000	5020000	10001	*	256.035990460919	47.4076846290451	121.824433786832	326.335874551859	162.939609905624	0.0028	0	0.595	0	Core	0	5.59716418569676	7.35702065989467	-3.28208783035557
Chr1	5020000	5030000	10001	*	248.300764163006	81.9192259724358	148.834491578585	382.057734559991	37.4269003289931	0.0031	0	0.5784	0	Core	0	6.37363474424665	5.26404470229653	-3.27788376218134
Chr1	5030000	5040000	10001	*	11.6028394468694	94.9720025773491	119.381663702307	267.012364709021	268.604306597777	0.0029	0	0.5849	0	Core	0	6.58454169203489	8.07469973176049	-3.28068511265548
Chr1	5040000	5050000	10001	*	36.3555636001909	141.283253971581	106.539672400802	311.552139104692	45.163797913438	0.0027	0	0.5664	0	Core	0	7.15262206362915	5.52869001483019	-3.28349191323125
Chr1	5050000	5060000	10001	*	2.32056788937389	213.386791937122	186.208873871824	261.581604748837	252.529056492994	0.0031	0	0.531	0	Core	0	7.74407221593523	7.98600729107076	-3.27788376218134
Chr1	5060000	5070000	10001	*	0	88.654458700571	168.306858823802	250.663514412219	368.82857000617	0.0025	0	0.5551	0	Core	0	6.48630342795589	8.53071286993625	-3.28630418515664
Chr1	5070000	5080000	10001	*	0.386761314895648	52.1066842068138	127.512598412227	279.363572257355	62.9340573830111	0.0027	0	0.5742	0	Core	0	5.73082155036364	5.99851274794399	-3.28349191323125
Chr1	5080000	5090000	10001	*	8.12198761280861	20.623387035763	164.503116835041	243.347073910305	927.935610640383	0.0034	0	0.5566	0	Core	0	4.43452061596996	9.85943478914991	-3.27369190923451
Chr1	5090000	5100000	10001	*	0.386761314895648	75.2362043507202	250.488623810336	217.928100207779	82.3719873566518	0.0027	0	0.533	0	Core	0	6.25240438700104	6.38149082040024	-3.28349191323125
Chr1	5100000	5110000	10001	*	587.877198641385	403.591852623919	1580.47224468795	551.146708736954	1340.09627489159	0.0036	0	0.5264	0	Core	0	8.66032345802135	10.3891970941066	-3.2709040918629
Chr1	5110000	5120000	10001	*	1.16028394468694	97.3737134726531	414.642773490445	273.235110496731	27.7762824939788	0.0031	0	0.5333	0	Core	0	6.62020095812492	4.84680832234033	-3.27788376218134
Chr1	5120000	5130000	10001	*	1.16028394468694	175.951428634231	419.737693952455	283.832635141256	16.26662212984	0.0028	0	0.5343	0	Core	0	7.46720959932086	4.1099139708536	-3.28208783035557
Chr1	5130000	5140000	10001	*	426.5977303299	112.306089908674	157.802947460343	342.741295264913	35.5405189391461	0.0026	0	0.5573	0	Core	0	6.82408159413642	5.19142521778589	-3.2848973639424
Chr1	5140000	5150000	10001	*	1.16028394468694	30.700130574756	141.994735341914	256.131987983237	171.988772804745	0.0034	0	0.5634	0	Core	0	4.98641687781246	7.4345345978996	-3.27369190923451
Chr1	5150000	5160000	10001	*	0.773522629791296	124.732333236551	139.935829127814	271.896277312103	296.025183902365	0.0036	0	0.554	0	Core	0	6.97421188966568	8.21444144790762	-3.2709040918629
Chr1	5160000	5170000	10001	*	418.862504031987	107.346034798807	166.701609911114	290.281662593974	206.217026429215	0.0032	0	0.5661	0	Core	0	6.75950254504502	7.6949987397866	-3.2764851241262
Chr1	5170000	5180000	10001	*	0.773522629791296	109.225634629914	123.115612260082	308.21448454583	443.764387246323	0.0035	0	0.578	0	Core	0	6.78431597314521	8.79689746434688	-3.27229732716276
Chr1	5180000	5190000	10001	*	411.900800363865	102.438190795359	96.419624907768	297.258680598376	678.960606041303	0.0032	0	0.5935	0	Core	0	6.69262513653409	9.40930735508599	-3.2764851241262
Chr1	5190000	5200000	10001	*	2.32056788937389	141.43988729084	147.054759088431	318.472586692843	596.971362734765	0.0028	0	0.5577	0	Core	0	7.15420938901989	9.22393258418168	-3.28208783035557
Chr1	5200000	5210000	10001	*	0.773522629791296	125.828766471364	135.643533122148	267.710066509461	311.991078564258	0.0035	0	0.5596	0	Core	0	6.98673819502101	8.28997772522484	-3.27229732716276
Chr1	5210000	5220000	10001	*	0.773522629791296	117.47498944422	102.735930412041	292.487908827798	2141.48029924789	0.0032	0	0.5614	0	Core	0	6.88843872220527	11.0650662230451	-3.2764851241262
Chr1	5220000	5230000	10001	*	2039.39241344475	116.796245060764	183.45203334786	239.46257199434	256.848596487137	0.0031	0	0.5323	0	Core	0	6.88014974151903	8.0103803825038	-3.27788376218134
Chr1	5230000	5240000	10001	*	277.694624095075	109.330056842754	134.631528372844	236.124917435477	1624.61179842981	0.0027	0	0.5299	0	Core	0	6.78568206276069	10.6667670627721	-3.28349191323125
Chr1	5240000	5250000	10001	*	1.16028394468694	84.1120924420612	187.849019500005	248.212129707969	576.767944660897	0.0034	0	0.5381	0	Core	0	6.41129221465784	9.17434635324521	-3.27369190923451
Chr1	5250000	5260000	10001	*	170.561739868981	89.6986808289641	131.246546970002	257.979954914133	90.5189678519329	0.0031	0	0.5488	0	Core	0	6.50300966245095	6.51599887642571	-3.27788376218134
Chr1	5260000	5270000	10001	*	373.998191504092	49.1828622473133	145.030749589824	237.727745895948	464.295871648861	0.0037	0	0.5382	0	Core	0	5.649122854041	8.86200457657301	-3.26951220073622
Chr1	5270000	5280000	10001	*	26.6865307277997	105.100957222762	185.720319854919	264.674120837275	662.748661632908	0.0027	0	0.5528	0	Core	0	6.72929386180782	9.37449323667831	-3.28349191323125
Chr1	5280000	5290000	10001	*	1.16028394468694	44.3272293502855	83.5427368907696	311.344714245102	363.63418646891	0.0043	0	0.6041	0	Core	0	5.50230607334563	8.51030601812118	-3.26118893702968
Chr1	5290000	5300000	10001	*	0.386761314895648	100.088691006475	114.984677550161	273.121969664227	321.395646652771	0.0034	0	0.5817	0	Core	0	6.65947779887063	8.33268845288731	-3.27369190923451
Chr1	5300000	5310000	10001	*	1.93380657447824	126.089822003462	123.045818829095	291.035934810666	132.839524250239	0.003	0	0.5558	0	Core	0	6.98970468641901	7.06436041202812	-3.27928375747887
Chr1	5310000	5320000	10001	*	1.16028394468694	131.467565964687	151.556435387056	194.790799960748	282.355753541155	0.0027	0	0.5326	0	Core	0	7.04949535586654	8.14647068645551	-3.28349191323125
Chr1	5320000	5330000	10001	*	1.16028394468694	56.8056837845826	145.484406891236	254.038882581916	1075.10069790917	0.0027	0	0.5509	0	Core	0	5.85313944859401	10.0715973714569	-3.28349191323125
Chr1	5330000	5340000	10001	*	860.157164327921	77.1158041818277	112.995564767048	278.873295316505	117.14701819557	0.0029	0	0.5748	0	Core	0	6.28754255501022	6.88443940868658	-3.28068511265548
Chr1	5340000	5350000	10001	*	448.643125278952	97.3215023662335	141.366594463036	262.524445019703	324.594293357294	0.0029	0	0.5622	0	Core	0	6.61943505534728	8.34693160369928	-3.28068511265548
Chr1	5350000	5360000	10001	*	0.773522629791296	114.968856336076	155.60445438427	267.710066509461	294.494207701909	0.0035	0	0.5488	0	Core	0	6.85759360855786	8.20698604064578	-3.27229732716276
Chr1	5360000	5370000	10001	*	887.230456370616	101.446179773386	113.170048344514	342.024736659055	534.201338516089	0.003	0	0.5659	0	Core	0	6.67872237690816	9.06393791387837	-3.27928375747887
Chr1	5370000	5380000	10001	*	461.019487355612	88.654458700571	158.012327753302	270.915723430403	97.6544105004846	0.0036	2	0.5631	0	Core	0	6.48630342795589	6.62431164522738	-3.2709040918629
Chr1	5380000	5390000	10001	*	922.038974711225	114.498956378299	136.690434586944	233.93752800707	405.736031981437	0.0031	0	0.5467	0	Core	0	6.85173600561818	8.66794899188118	-3.27788376218134
Chr1	5390000	5400000	10001	*	2.32056788937389	95.0764247901884	138.086303206673	315.455497826074	416.124799055956	0.0026	0	0.5646	0	Core	0	6.5861105611533	8.70433527618431	-3.2848973639424
Chr1	5400000	5410000	10001	*	440.521137666143	59.8339279569225	121.824433786832	276.45962422309	128.246595648873	0.0028	0	0.5823	0	Core	0	5.9268042547938	7.01398247027492	-3.28208783035557
Chr1	5410000	5420000	10001	*	1.54704525958259	110.896390035343	105.737047944458	314.399516722705	10660.7067221255	0.0034	0	0.596	0	Core	0	6.8060196830853	13.3801507822296	-3.27369190923451
Chr1	5420000	5430000	10001	*	1.93380657447824	113.193678717808	127.093837826309	237.388323398437	98.2558654363778	0.0032	0	0.5662	0	Core	0	6.83533898115079	6.63308045443204	-3.2764851241262
Chr1	5430000	5440000	10001	*	527.542433517664	71.5814269013445	100.153573465543	322.677654300902	3577.07121464289	0.0031	0	0.568	0	Core	0	6.18152851438384	11.8049663864146	-3.27788376218134
Chr1	5440000	5450000	10001	*	72.3243658854862	86.0439033795884	162.723384344887	243.196219466966	322.62589538528	0.0033	0	0.5537	0	Core	0	6.44367134885735	8.33818324145242	-3.27508784068439
Chr1	5450000	5460000	10001	*	1.16028394468694	68.7620271546832	98.8274982768002	323.865633042192	216.687810085902	0.003	0	0.5999	0	Core	0	6.12437005764436	7.76611681263845	-3.27928375747887
Chr1	5460000	5470000	10001	*	0.386761314895648	78.6821373744173	96.1753478993154	301.01118487642	312.893260968098	0.003	0	0.6018	0	Core	0	6.31618444131589	8.29413024554321	-3.27928375747887
Chr1	5470000	5480000	10001	*	133.432653638999	51.9500508875549	200.935287809963	241.895099893172	143.173613603314	0.0027	0	0.5458	0	Core	0	5.72656016560522	7.17166333904862	-3.28349191323125
Chr1	5480000	5490000	10001	*	469.528236283317	93.4056693847595	103.015104135987	276.233342558083	63.4808345974595	0.0028	0	0.5985	0	Core	0	6.56080159586937	6.01079851216862	-3.28208783035557
Chr1	5490000	5500000	10001	*	366.649726521074	64.6895608539502	126.884457533349	268.652906780326	59.8174272606552	0.0032	0	0.5818	0	Core	0	6.03759221580249	5.92641288269968	-3.2764851241262
Chr1	5500000	5510000	10001	*	968.450332498702	72.7300712425768	122.417677950217	340.516192225671	350.86693851154	0.0027	0	0.5779	0	Core	0	6.20418124587937	8.45888615431352	-3.28349191323125
Chr1	5510000	5520000	10001	*	1.54704525958259	70.2761492408531	120.952015899502	356.18619752745	49.5380156290252	0.0029	0	0.588	0	Core	0	6.15534749093362	5.65929711298152	-3.28068511265548
Chr1	5520000	5530000	10001	*	0.773522629791296	80.4573149926855	316.478312808016	209.763103462087	23.0466595890001	0.0032	1	0.5601	0	Core	0	6.34797235569839	4.58776459266253	-3.2764851241262
Chr1	5530000	5540000	10001	*	773.522629791296	82.0236481852751	124.581274310797	316.190913237349	160.151046111937	0.0031	1	0.5782	0	Core	0	6.37545042243435	7.33226974345673	-3.27788376218134
Chr1	5540000	5550000	10001	*	429.691820849065	85.1041034640346	131.211650254509	244.629336678681	99.1853867009401	0.0028	0	0.5681	0	Core	0	6.42801008867841	6.64652827843173	-3.28208783035557
Chr1	5550000	5560000	10001	*	589.037482586072	87.7668698914369	111.843973155771	359.636992918817	111.542551747474	0.0035	1	0.5698	0	Core	0	6.47194942054276	6.81432676977822	-3.27229732716276
Chr1	5560000	5570000	10001	*	1403.17005044141	69.7018270702369	114.565916964243	332.539763534152	146.727665497229	0.0029	0	0.5722	0	Core	0	6.14367559239886	7.2067962199269	-3.28068511265548
Chr1	5570000	5580000	10001	*	464.887100504569	63.3320720870393	142.308805781353	354.055378515295	210.864632752026	0.0036	0	0.5744	0	Core	0	6.00746625242863	7.72699896383762	-3.2709040918629
Chr1	5580000	5590000	10001	*	518.260161960168	72.6778601361572	164.258839826588	293.52503312575	767.839242249891	0.003	0	0.5684	0	Core	0	6.2031592559938	9.58653816422465	-3.27928375747887
Chr1	5590000	5600000	10001	*	586.330153381802	876.467843466717	481.714260668415	84.8179107670322	157.280465736083	0.0214	1	0.3403	0	Core	0	9.77720244576611	7.30633940529621	-3.04215967329377
Chr1	5600000	5610000	10001	*	1014.86169028618	808.071294056972	478.119898972613	87.7972860229662	37.3722226075483	0.0212	3	0.3425	0	Core	0	9.66012302599063	5.26199042646921	-3.0445383960765
Chr1	5610000	5620000	10001	*	0.773522629791296	92.8313472141433	119.102489978361	266.993507903604	357.100198756251	0.0035	0	0.5631	0	Core	0	6.55199807429373	8.484219509172	-3.27229732716276
Chr1	5620000	5630000	10001	*	519.807207219751	123.009366724703	147.054759088431	249.701817335936	725.436669269417	0.0034	0	0.5548	0	Core	0	6.95430528471686	9.50469321899758	-3.27369190923451
Chr1	5630000	5640000	10001	*	1.54704525958259	88.81109201983	114.356536671283	338.366516408098	126.824974891307	0.0031	0	0.5676	0	Core	0	6.48882172931684	6.99802593241064	-3.27788376218134
Chr1	5640000	5650000	10001	*	1.16028394468694	161.958852113764	112.053353448731	285.096041104215	176.007585330941	0.0031	0	0.5645	0	Core	0	7.34836391284695	7.46766737542113	-3.27788376218134
Chr1	5650000	5660000	10001	*	317.144278214431	98.8356244524034	146.670895218005	244.893331954524	2544.12703996769	0.0033	0	0.5675	0	Core	0	6.64148280073066	11.3135219548558	-3.27508784068439
Chr1	5660000	5670000	10001	*	835.791201489495	174.228462122383	122.382781234724	270.991150652072	32.8066328669041	0.0036	0	0.5551	0	Core	0	7.45309331875375	5.07923442616962	-3.2709040918629
Chr1	5670000	5680000	10001	*	0	102.072713050422	108.633475330395	294.637584645371	228.607553360877	0.0024	0	0.5797	0	Core	0	6.68751864122707	7.84302629266392	-3.28771237954945
Chr1	5680000	5690000	10001	*	1.93380657447824	89.3332030840265	78.8316802991849	313.833812560186	568.128864672612	0.0031	0	0.5962	0	Core	0	6.49718446044639	9.15261154068089	-3.27788376218134
Chr1	5690000	5700000	10001	*	0.773522629791296	96.5905468763583	171.307976356219	248.080132070048	188.938866452645	0.0027	0	0.5419	0	Core	0	6.6086695025618	7.56939133855415	-3.28349191323125
Chr1	5700000	5710000	10001	*	0.773522629791296	100.81964649635	146.950068941951	218.192095483622	146.481615750727	0.0033	0	0.5436	0	Core	0	6.66987215166128	7.20439131700659	-3.27508784068439
Chr1	5710000	5720000	10001	*	2.32056788937389	106.145179351155	156.058111685682	218.474947564881	324.703648800183	0.0028	0	0.5406	0	Core	0	6.74342313187847	8.34741607185562	-3.28208783035557
Chr1	5720000	5730000	10001	*	496.988289640908	140.813354013805	142.727566367271	258.093095746636	101.290478976566	0.0032	0	0.5488	0	Core	0	7.14784958174829	6.67652805751163	-3.2764851241262
Chr1	5730000	5740000	10001	*	1.93380657447824	113.037045398549	131.211650254509	297.051255738786	6.1239048018221	0.0033	0	0.569	0	Core	0	6.83335875566375	2.83266823754329	-3.27508784068439
Chr1	5740000	5750000	10001	*	0.773522629791296	66.6735828978971	103.189587713453	284.417196109192	99.0760312580504	0.0029	0	0.5796	0	Core	0	6.08052086724143	6.64495267218226	-3.28068511265548
Chr1	5750000	5760000	10001	*	66.5229461620514	49.4961288858312	88.8121409302459	310.119021892977	165.099379902695	0.003	0	0.6094	0	Core	0	5.65810088767695	7.37590287708479	-3.27928375747887
Chr1	5760000	5770000	10001	*	706.612922314349	36.9654633451144	152.079886119455	300.388910297649	145.333383600385	0.0039	0	0.5595	0	Core	0	5.24661571036963	7.19311512439516	-3.26673244064524
Chr1	5770000	5780000	10001	*	0.386761314895648	137.576265415786	140.598866722185	301.671173066025	299.770607821336	0.003	0	0.5777	0	Core	0	7.11453637149843	8.23251977932269	-3.27928375747887
Chr1	5780000	5790000	10001	*	0.773522629791296	110.687545609665	140.773350299651	300.03063099472	9.81465099934882	0.0026	0	0.5563	0	Core	0	6.80332450819268	3.43491520358689	-3.2848973639424
Chr1	5790000	5800000	10001	*	2.70732920426954	36.7566189194358	95.3029300119849	374.345301144314	114.76853731272	0.003	0	0.6065	0	Core	0	5.23865767297268	6.85509941175151	-3.27928375747887
Chr1	5800000	5810000	10001	*	0.386761314895648	75.0273599250416	89.7543522485629	254.434875495679	51.8344799297085	0.0032	0	0.5965	0	Core	0	6.24844678877169	5.72340783864768	-3.2764851241262
Chr1	5810000	5820000	10001	*	0.386761314895648	61.0347834045745	138.400373646112	311.797277575117	105.719374413599	0.0028	0	0.5422	0	Core	0	5.95500546803158	6.73767830439108	-3.28208783035557
Chr1	5820000	5830000	10001	*	1.16028394468694	66.2558940465398	126.57038709391	296.334697132928	642.271854951815	0.0037	0	0.5532	0	Core	0	6.07158880031282	9.32928475766071	-3.26951220073622
Chr1	5830000	5840000	10001	*	613.016684109602	87.9757143171155	122.592161527683	255.302288544875	867.708100468891	0.0033	0	0.5635	0	Core	0	6.47533970495031	9.76272768010572	-3.27508784068439
Chr1	5840000	5850000	10001	*	0.773522629791296	99.5143688358589	151.800712395509	312.513836180975	485.428810987291	0.003	0	0.5546	0	Core	0	6.6512579435816	8.92608487134716	-3.27928375747887
Chr1	5850000	5860000	10001	*	0	80.5617372055248	106.993329702214	315.776063518168	221.718160458827	0.0029	0	0.5736	0	Core	0	6.34982059892143	7.79907539018011	-3.28068511265548
Chr1	5860000	5870000	10001	*	0.773522629791296	68.7620271546832	140.563970006692	262.769583490128	93.1161596205628	0.0033	0	0.559	0	Core	0	6.12437005764436	6.55637054794631	-3.27508784068439
Chr1	5870000	5880000	10001	*	1433.33743300327	94.6587359388311	127.128734541802	308.949899957104	11.7283712499182	0.0029	0	0.5631	0	Core	0	6.57982482216361	3.6699759155405	-3.28068511265548
Chr1	5880000	5890000	10001	*	0.773522629791296	71.2681602628265	112.053353448731	340.704760279844	29.7720193267155	0.0031	0	0.5731	0	Core	0	6.17528826283261	4.943547214446	-3.27788376218134
Chr1	5890000	5900000	10001	*	0.773522629791296	43.3352183283121	113.379428637473	285.416606796309	284.187457209557	0.0024	0	0.5897	0	Core	0	5.47038127497016	8.15576672197907	-3.28771237954945
Chr1	5900000	5910000	10001	*	0.386761314895648	107.450457011646	89.8590423950426	321.169109867517	288.233608596475	0.003	0	0.6187	0	Core	0	6.76089232233352	8.17609139122798	-3.27928375747887
Chr1	5910000	5920000	10001	*	0.773522629791296	93.1968249590808	129.327227617875	266.861510265683	643.939525455883	0.0032	0	0.5739	0	Core	0	6.55760652741134	9.33302007834904	-3.2764851241262
Chr1	5920000	5930000	10001	*	0.386761314895648	50.9580398655815	118.125381944551	272.820260777551	90.2182403839863	0.0032	0	0.5713	0	Core	0	5.69927510054718	6.51125043550858	-3.2764851241262
Chr1	5930000	5940000	10001	*	0.386761314895648	87.9757143171155	117.846208220605	314.606941582296	115.34265338789	0.003	0	0.5614	0	Core	0	6.47533970495031	6.86223630249055	-3.27928375747887
Chr1	5940000	5950000	10001	*	340.736718423066	91.0561695958751	115.717508575519	293.015899379483	390.86369174844	0.0037	0	0.6016	0	Core	0	6.52444250898943	8.61420809555201	-3.26951220073622
Chr1	5950000	5960000	10001	*	169.788217239189	62.7055388100034	140.843143730638	256.584551313252	690.606960709054	0.0026	0	0.5552	0	Core	0	5.99334690640093	9.43380857889647	-3.2848973639424
Chr1	5960000	5970000	10001	*	0.773522629791296	118.780267104711	133.200763037622	231.580427329907	52.3265794227121	0.0028	0	0.55	0	Core	0	6.90424644435354	5.73678288572175	-3.28208783035557
Chr1	5970000	5980000	10001	*	448.643125278952	105.727490499798	137.039401741877	203.615784896046	30.9202514770571	0.0031	0	0.5299	0	Core	0	6.73778801822849	4.99640011246498	-3.27788376218134
Chr1	5980000	5990000	10001	*	1.16028394468694	71.1637380499872	95.7565873133968	276.176772141831	7053.04332233427	0.0032	0	0.5796	0	Core	0	6.17320216638674	12.7842347207502	-3.2764851241262
Chr1	5990000	6000000	10001	*	1.16028394468694	29.3426418078451	109.261616209273	300.011774189303	173.711121030257	0.0028	0	0.5868	0	Core	0	4.92327479540818	7.44882763400279	-3.28208783035557
Chr1	6000000	6010000	10001	*	1.54704525958259	69.1275048996207	121.68484692486	279.005292954426	41.7191014624131	0.0029	0	0.5761	0	Core	0	6.13190849346753	5.41680939712459	-3.28068511265548
Chr1	6010000	6020000	10001	*	973.478229592346	135.278976733321	125.872452784046	241.499106979409	68.1284409202709	0.0027	0	0.5465	0	Core	0	7.09041920971739	6.11120748325547	-3.28349191323125
Chr1	6020000	6030000	10001	*	73.0978885152775	72.1557490719606	121.615053493873	297.070112544203	59.2433111854844	0.0034	0	0.5581	0	Core	0	6.19289934040893	5.91272916269923	-3.27369190923451
Chr1	6030000	6040000	10001	*	0.386761314895648	75.1839932443005	110.238724243083	330.465514938248	131.663953239175	0.0031	0	0.5782	0	Core	0	6.25141600477289	7.05163261212084	-3.27788376218134
Chr1	6040000	6050000	10001	*	194.154180077615	61.9223722137086	90.7314602823731	305.574531787407	46.1479968994451	0.0033	0	0.5884	0	Core	0	5.97550115719277	5.55912457364299	-3.27508784068439
Chr1	6050000	6060000	10001	*	0	107.241612585968	119.660837426253	262.05302488427	23.0193207282777	0.0029	0	0.5896	0	Core	0	6.75811142766494	4.58612344677179	-3.28068511265548
Chr1	6060000	6070000	10001	*	1.54704525958259	106.562868202512	116.869100186795	299.106647529272	177.784611277898	0.0031	1	0.566	0	Core	0	6.74903632059248	7.48207875298214	-3.27788376218134
Chr1	6070000	6080000	10001	*	2.32056788937389	124.158011065935	150.125670051834	256.546837702417	368.090420766664	0.0032	0	0.5623	0	Core	0	6.96760682722689	8.5278304846821	-3.2764851241262
Chr1	6080000	6090000	10001	*	0.386761314895648	111.105234461022	155.569557668777	298.55980017217	224.452046531069	0.0028	1	0.5514	0	Core	0	6.80870983236633	7.81667679581059	-3.28208783035557
Chr1	6090000	6100000	10001	*	0.773522629791296	75.9671598405953	123.220302406561	275.026507011375	72.4753197751357	0.003	0	0.5772	0	Core	0	6.26617110639212	6.19918782759348	-3.27928375747887
Chr1	6100000	6110000	10001	*	951.046073328398	84.8430479319364	131.630410840427	252.586908564784	771.858054776087	0.0034	0	0.5467	0	Core	0	6.42362939603101	9.59405965893774	-3.27369190923451
Chr1	6110000	6120000	10001	*	39.8364154342517	59.1029724670474	132.433035296771	363.728919694372	291.623627326055	0.0028	0	0.562	0	Core	0	5.90936443786082	8.19290245156126	-3.28208783035557
Chr1	6120000	6130000	10001	*	1158.73689942736	84.738625719097	123.115612260082	268.520909142405	45.683236267164	0.0026	0	0.5748	0	Core	0	6.42187338766467	5.54483267274389	-3.2848973639424
Chr1	6130000	6140000	10001	*	0.773522629791296	80.0396261413283	146.461514925046	247.005294161262	515.966318414234	0.0025	0	0.5356	0	Core	0	6.34055561348229	9.013926478362	-3.28630418515664
Chr1	6140000	6150000	10001	*	1.54704525958259	122.121777915569	151.27726166311	202.220381295165	96.6975503751999	0.0029	0	0.5342	0	Core	0	6.94394215965497	6.61025048404257	-3.28068511265548
Chr1	6150000	6160000	10001	*	0.386761314895648	101.080702028448	158.5357784857	243.573355575312	223.22179779856	0.0029	0	0.5432	0	Core	0	6.67356634571309	7.80878272682637	-3.28068511265548
Chr1	6160000	6170000	10001	*	360.074784167848	109.330056842754	180.939469832348	290.45137384273	401.580525151629	0.003	1	0.544	0	Core	0	6.78568206276069	8.65313357329395	-3.27928375747887
Chr1	6170000	6180000	10001	*	3.09409051916518	106.145179351155	141.541078040502	225.565106401787	641.697738876645	0.0033	0	0.5458	0	Core	0	6.74342313187847	9.32799658650402	-3.27508784068439
Chr1	6180000	6190000	10001	*	1064.36713859282	102.908090753136	157.523773736397	242.81908335862	147.848558786848	0.0029	0	0.5331	0	Core	0	6.6991641831408	7.21770144264974	-3.28068511265548
Chr1	6190000	6200000	10001	*	433.172672683126	94.084413768215	130.757992953097	284.341768887523	67.0348864913741	0.003	0	0.5929	0	Core	0	6.57113696886312	6.08820280686506	-3.27928375747887
Chr1	6200000	6210000	10001	*	1.16028394468694	118.571422679032	101.758822378231	256.226272010323	54.8144157484523	0.003	0	0.5909	0	Core	0	6.90172881939774	5.80256588437513	-3.27928375747887
Chr1	6210000	6220000	10001	*	853.195460659799	51.8456286747156	118.648832676949	276.516194639342	266.253164575649	0.0032	0	0.5612	0	Core	0	5.72371223347479	8.06206322094057	-3.2764851241262
Chr1	6220000	6230000	10001	*	413.834606938343	67.8222272391294	128.594396592517	228.921617766067	163.103643069958	0.0025	0	0.5541	0	Core	0	6.10480267651257	7.35846345653996	-3.28630418515664
Chr1	6230000	6240000	10001	*	0.773522629791296	146.347731294288	141.052524023597	339.988201673986	59.024600299705	0.0032	0	0.5547	0	Core	0	7.20308103730364	5.90748198655333	-3.2764851241262
Chr1	6240000	6250000	10001	*	1.16028394468694	60.8259389788959	126.500593662924	230.166166923609	182.076812411318	0.0027	0	0.5394	0	Core	0	5.95014034054034	7.51630526797943	-3.28349191323125
Chr1	6250000	6260000	10001	*	1.93380657447824	81.6059593339179	113.100254913527	276.968757969357	183.00633367588	0.0037	0	0.5658	0	Core	0	6.36817395875198	7.52361161586962	-3.26951220073622
Chr1	6260000	6270000	10001	*	1.16028394468694	58.4242280835919	104.515662902195	280.890973496157	237.410666513496	0.0026	0	0.5755	0	Core	0	5.89297935267296	7.89730497331757	-3.2848973639424
Chr1	6270000	6280000	10001	*	273.053488316327	91.8915472985895	123.045818829095	315.964631572341	303.789420347532	0.0038	0	0.5582	0	Core	0	6.53747541888798	8.25166901558152	-3.26812165119157
Chr1	6280000	6290000	10001	*	0.773522629791296	81.1882704825606	121.754640355846	311.49556868844	335.693870810596	0.0026	0	0.5847	0	Core	0	6.36086060893901	8.39529364829805	-3.2848973639424
Chr1	6290000	6300000	10001	*	0.773522629791296	85.051892357615	112.507010750143	245.421322506208	56.6734582775769	0.0035	0	0.5868	0	Core	0	6.42713501364823	5.84983562829891	-3.27229732716276
Chr1	6300000	6310000	10001	*	1.93380657447824	138.307220905661	101.165578214846	318.661154747016	170.430457743567	0.0027	0	0.5923	0	Core	0	7.12212623087821	7.42147964305179	-3.28349191323125
Chr1	6310000	6320000	10001	*	132.659131009207	81.1882704825606	120.358771736117	251.870349958926	43.1133833592565	0.0028	2	0.5764	0	Core	0	6.36086060893901	5.46314450978204	-3.28208783035557
Chr1	6320000	6330000	10001	*	1.54704525958259	67.5611717070311	119.4165604178	279.137290592347	203.291768331916	0.0028	0	0.5757	0	Core	0	6.0993198601353	7.67448726351802	-3.28208783035557
Chr1	6330000	6340000	10001	*	871.76000377479	94.2932581938936	123.988030147412	261.600461554255	241.784884229083	0.0031	0	0.5672	0	Core	0	6.57430224486425	7.92353479206605	-3.27788376218134
Chr1	6340000	6350000	10001	*	862.477732217295	138.985965289117	319.479430340433	283.17264695165	16.5126718763417	0.0032	1	0.5782	0	Core	0	7.12913838249668	4.13032730479708	-3.2764851241262
Chr1	6350000	6360000	10001	*	794.794502110556	80.822792737623	115.996682299465	343.778419562864	13.7241080826549	0.003	0	0.5757	0	Core	0	6.35443087435189	3.88010833989706	-3.27928375747887
Chr1	6360000	6370000	10001	*	2.32056788937389	92.726925001304	97.6061132345375	364.596332743568	125.102626665794	0.0033	0	0.5758	0	Core	0	6.55039164635635	6.97845451649755	-3.27508784068439
Chr1	6370000	6380000	10001	*	0.773522629791296	137.680687628625	134.840908665804	296.88154449003	10.5254613781317	0.0032	0	0.568	0	Core	0	7.11562308484568	3.52675259952198	-3.2764851241262
Chr1	6380000	6390000	10001	*	839.658814638452	129.326910601481	119.311870271321	277.081898801861	108.699310232342	0.0027	0	0.5945	0	Core	0	7.02599119987229	6.77741064416207	-3.28349191323125
Chr1	6390000	6400000	10001	*	0	130.110077197776	409.198885873502	253.341180781476	10.1700561887403	0.0025	0	0.5445	0	Core	0	7.0346347659868	3.48156453791656	-3.28630418515664
Chr1	6400000	6410000	10001	*	0.773522629791296	116.952878380023	164.223943111095	326.581013022284	220.378556283428	0.0034	0	0.5652	0	Core	0	6.88206681457437	7.79037167277114	-3.27369190923451
Chr1	6410000	6420000	10001	*	1.16028394468694	157.886385813031	165.305741291385	257.112541864937	656.952823159755	0.0029	0	0.5426	0	Core	0	7.31185170236879	9.36184033265088	-3.28068511265548
Chr1	6420000	6430000	10001	*	2.32056788937389	141.909787248617	147.613106536322	286.944008035111	87.5663708939116	0.0029	0	0.5705	0	Core	0	7.158960913287	6.46868709892264	-3.28068511265548
Chr1	6430000	6440000	10001	*	419.636026661778	58.8941280413687	108.807958907861	257.885670887046	528.651549789437	0.0032	0	0.5517	0	Core	0	5.90434266449825	9.04889973300426	-3.2764851241262
Chr1	6440000	6450000	10001	*	813.745806540443	184.827316725572	125.139621758688	312.26869771055	169.172870150336	0.0034	0	0.5776	0	Core	0	7.53781878410966	7.41085724313606	-3.27369190923451
Chr1	6450000	6460000	10001	*	481.517837045082	137.158576564429	93.0695402204188	315.568638658578	53.9942499267797	0.0029	0	0.5849	0	Core	0	7.11018131387161	5.78120887651031	-3.28068511265548
Chr1	6460000	6470000	10001	*	3.09409051916518	85.7306367410705	114.356536671283	242.573944888195	139.455528545065	0.003	0	0.5521	0	Core	0	6.43846979614275	7.1339696020466	-3.27928375747887
Chr1	6470000	6480000	10001	*	0.386761314895648	33.7283747470959	117.706621358632	324.242769150538	75.099850404488	0.0031	0	0.5808	0	Core	0	5.11804299051466	6.2498217125989	-3.27788376218134
Chr1	6480000	6490000	10001	*	1.16028394468694	77.6379152460242	135.469049544682	291.262216475674	429.411485367053	0.003	0	0.5637	0	Core	0	6.29715317007438	8.74957276595227	-3.27928375747887
Chr1	6490000	6500000	10001	*	1.16028394468694	123.949166640257	114.147156378324	274.347662016352	74.0062959755912	0.0037	0	0.5862	0	Core	0	6.96519746904665	6.22893979438301	-3.26951220073622
Chr1	6500000	6510000	10001	*	41.3834606938343	72.7300712425768	114.670607110722	296.466694770849	201.241353777734	0.0031	2	0.5641	0	Core	0	6.20418124587937	7.65993421565063	-3.27788376218134
Chr1	6510000	6520000	10001	*	1.93380657447824	88.3411920620531	148.415730992666	250.833225660974	1065.61411323849	0.0024	0	0.5779	0	Core	0	6.48125359925474	10.0588226073929	-3.28771237954945
Chr1	6520000	6530000	10001	*	17.0174978554085	73.8265044773895	146.531308356032	265.560390691889	74.0883125577585	0.0031	0	0.5882	0	Core	0	6.22547747603137	6.23051646564784	-3.27788376218134
Chr1	6530000	6540000	10001	*	337.642627903901	90.6906918509375	106.783949409254	334.180305605457	1209.47119835986	0.0034	0	0.5732	0	Core	0	6.51870337830317	10.2413530372928	-3.27369190923451
Chr1	6540000	6550000	10001	*	0.773522629791296	99.8798465807965	119.032696547375	280.740119052818	890.28999942561	0.0036	0	0.5774	0	Core	0	6.65649417648834	9.7997511082351	-3.2709040918629
Chr1	6550000	6560000	10001	*	1.16028394468694	93.6145138104381	151.416848525083	278.797868094836	290.748783782938	0.0029	0	0.5672	0	Core	0	6.56398960399375	8.18858283153775	-3.28068511265548
Chr1	6560000	6570000	10001	*	312.503142435684	96.5383357699387	113.623705645926	311.740707158865	110.722385925801	0.0028	0	0.589	0	Core	0	6.60789745175018	6.80377447880388	-3.28208783035557
Chr1	6570000	6580000	10001	*	768.881494012548	54.038495144341	103.05000085148	270.142594408293	58.1224178958651	0.0028	0	0.5755	0	Core	0	5.78236911947904	5.88563336665566	-3.28208783035557
Chr1	6580000	6590000	10001	*	1456.54311189701	127.91721072815	126.326110085458	255.208004517789	88.3591978548617	0.0027	0	0.5537	0	Core	0	7.01030106925908	6.48154433021612	-3.28349191323125
Chr1	6590000	6600000	10001	*	20.885111004365	92.6225027884647	106.051118383897	307.554496356224	48.1437337321818	0.0028	0	0.5812	0	Core	0	6.54878342768176	5.61893556659376	-3.28208783035557
Chr1	6600000	6610000	10001	*	1.54704525958259	112.82820097287	121.545260062887	331.370641598279	53.9122333446124	0.0026	0	0.5696	0	Core	0	6.83071421985666	5.77905568345372	-3.2848973639424
Chr1	6610000	6620000	10001	*	3.09409051916518	81.9714370788554	132.153861572826	280.909830301574	61.2663868789434	0.0027	0	0.5613	0	Core	0	6.37454286897667	5.96038166151119	-3.28349191323125
Chr1	6620000	6630000	10001	*	348.471944720979	63.1232276613606	116.729513324822	306.347660809517	133.276946021798	0.0038	0	0.5838	0	Core	0	6.00277514068305	7.06906781981893	-3.26812165119157
Chr1	6630000	6640000	10001	*	2.70732920426954	39.889285304615	112.995564767048	283.700637503335	121.849302239826	0.0034	0	0.5873	0	Core	0	5.35365094140293	6.94074585327048	-3.27369190923451
Chr1	6640000	6650000	10001	*	0.773522629791296	56.1791505075468	120.917119184009	351.622850616463	62.4419578900075	0.0028	0	0.5773	0	Core	0	5.83741728135422	5.98736538980407	-3.28208783035557
Chr1	6650000	6660000	10001	*	1.54704525958259	82.2847037173733	147.403726243363	265.975240411069	74.7991229365414	0.0026	0	0.5312	0	Core	0	6.37997964573045	6.24410925011192	-3.2848973639424
Chr1	6660000	6670000	10001	*	0	79.2042484386138	106.365188823336	307.290501080382	243.835298783265	0.0033	0	0.5723	0	Core	0	6.32560675350003	7.93566776131976	-3.27508784068439
Chr1	6670000	6680000	10001	*	0.386761314895648	62.3400610650658	112.821081189582	255.962276734481	204.029917571421	0.0031	0	0.5522	0	Core	0	5.98504635313167	7.67969063015285	-3.27788376218134
Chr1	6680000	6690000	10001	*	1077.13026198438	109.95659011979	167.504234367458	248.419554567559	172.180144829802	0.0032	0	0.5442	0	Core	0	6.79385154681654	7.43612972377934	-3.2764851241262
Chr1	6690000	6700000	10001	*	894.965682668529	49.3394955665722	95.79148402889	341.553316523623	39.9967532369006	0.0036	0	0.5974	0	Core	0	5.65361885474639	5.35743775402059	-3.2709040918629
Chr1	6700000	6710000	10001	*	634.288556428863	103.639046243011	118.753522823429	404.101340092819	63.7268843439613	0.0033	0	0.5595	0	Core	0	6.7092774860029	6.01629315569435	-3.27508784068439
Chr1	6710000	6720000	10001	*	1281.34023624928	47.1988402033664	114.600813679736	286.265163040088	181.256646589645	0.0033	0	0.5804	0	Core	0	5.59092652655042	7.50982761791855	-3.27508784068439
Chr1	6720000	6730000	10001	*	442.841705555517	87.7146587850173	122.173400941765	317.925739335741	20.7228564275944	0.0036	0	0.6187	0	Core	0	6.47110060312445	4.44114191639855	-3.2709040918629
Chr1	6730000	6740000	10001	*	1764.40511855395	88.9155142326693	125.977142930526	386.96050396849	107.250350614054	0.0031	0	0.5806	0	Core	0	6.49049815807399	6.75822788750583	-3.27788376218134
Chr1	6740000	6750000	10001	*	510.524935662255	64.7939830667896	100.118676750049	326.18502010852	131.226531467616	0.0032	0	0.5867	0	Core	0	6.0398837488081	7.04686787476215	-3.2764851241262
Chr1	6750000	6760000	10001	*	1.93380657447824	134.182543498509	124.546377595304	322.885079160492	19.6019631379752	0.0031	0	0.5726	0	Core	0	7.07876505416014	4.36470991163945	-3.27788376218134
Chr1	6760000	6770000	10001	*	1.16028394468694	115.177700761755	134.317457933405	218.55037478655	108.617293650175	0.0027	0	0.548	0	Core	0	6.86018937308087	6.77633161120438	-3.28349191323125
Chr1	6770000	6780000	10001	*	0.386761314895648	107.293823692387	144.611989003905	328.768402450691	115.233297945001	0.0032	0	0.5712	0	Core	0	6.75880715402793	6.86087961392603	-3.2764851241262
Chr1	6780000	6790000	10001	*	102.104987132451	80.2484705670069	97.2571460796053	295.127861586221	128.027884763093	0.0033	0	0.5907	0	Core	0	6.34426875067074	7.01153907605942	-3.27508784068439
Chr1	6790000	6800000	10001	*	2.70732920426954	93.4056693847595	136.830021448917	323.771349015105	46.5034020888366	0.003	0	0.5721	0	Core	0	6.56080159586937	5.56995893466637	-3.27928375747887
Chr1	6800000	6810000	10001	*	0.773522629791296	178.979672806571	132.537725443251	327.712421347322	179.561637224855	0.0028	0	0.5715	0	Core	0	7.49169016523438	7.49634759497156	-3.28208783035557
Chr1	6810000	6820000	10001	*	1.16028394468694	110.061012332629	141.471284609516	270.161451213711	343.8681901666	0.0029	0	0.5585	0	Core	0	6.79520864119164	8.42990125390167	-3.28068511265548
Chr1	6820000	6830000	10001	*	1.54704525958259	104.996535009922	164.81718727448	302.463158893552	12.1657930214769	0.0034	0	0.5586	0	Core	0	6.727873294132	3.71872251742555	-3.27369190923451
Chr1	6830000	6840000	10001	*	5.41465840853907	100.088691006475	150.439740491273	242.027097531094	561.731571263566	0.0026	0	0.5393	0	Core	0	6.65947779887063	9.13630309581754	-3.2848973639424
Chr1	6840000	6850000	10001	*	1.54704525958259	102.124924156842	124.057823578399	365.388318571095	930.314091523234	0.0032	0	0.5946	0	Core	0	6.68824924810444	9.86312399758296	-3.2764851241262
Chr1	6850000	6860000	10001	*	0.773522629791296	111.261867780281	135.922706846093	273.159683275062	36.0052795714273	0.0034	0	0.5613	0	Core	0	6.81072415752707	5.20965921071387	-3.27369190923451
Chr1	6860000	6870000	10001	*	465.66062313436	130.318921623454	150.649120784232	261.35532308383	90.847034180602	0.0038	0	0.5462	0	Core	0	7.03693099759385	6.52116123111762	-3.26812165119157
Chr1	6870000	6880000	10001	*	490.026585972786	85.8350589539098	125.663072491087	288.28284121974	285.636416827845	0.0035	0	0.5671	0	Core	0	6.44020573164769	8.1630781037688	-3.27229732716276
Chr1	6880000	6890000	10001	*	1489.41782366314	90.8473251701965	204.145785635339	304.3676962407	11.0175608711353	0.0036	0	0.5714	0	Core	0	6.521165801854	3.58707220589491	-3.2709040918629
Chr1	6890000	6900000	10001	*	1.54704525958259	110.322067864727	112.123146879717	314.43723033354	221.745499319549	0.0026	0	0.575	0	Core	0	6.79859580260897	7.79925247146597	-3.2848973639424
Chr1	6900000	6910000	10001	*	128.791517860251	106.87613484103	247.033848976507	249.418965254677	44.2342766488757	0.0029	0	0.5621	0	Core	0	6.75323192619786	5.49934449608442	-3.28068511265548
Chr1	6910000	6920000	10001	*	0.386761314895648	212.969103085765	474.490640561318	278.383018375655	2.13243113634877	0.003	0	0.561	0	Core	0	7.74125867778867	1.64728279355666	-3.27928375747887
Chr1	6920000	6930000	10001	*	1.16028394468694	130.110077197776	197.515409691627	287.490855392213	28.1043488226479	0.0036	2	0.5549	0	Core	0	7.0346347659868	4.86316283414142	-3.2709040918629
Chr1	6930000	6940000	10001	*	347.311660776292	120.973133574336	153.650238316649	308.780188708349	56.0173256202388	0.0031	0	0.5771	0	Core	0	6.93041959717352	5.83332846659213	-3.27788376218134
Chr1	6940000	6950000	10001	*	779.324049514731	82.9112369944092	110.971555268441	304.971114014053	86.5274941864596	0.0028	0	0.6173	0	Core	0	6.39079211735905	6.45166436321399	-3.28208783035557
Chr1	6950000	6960000	10001	*	230.896504992702	154.492663895754	202.95929730857	298.484372950501	7.40883125577585	0.003	0	0.5708	0	Core	0	7.28070270575194	3.07190529409881	-3.27928375747887
Chr1	6960000	6970000	10001	*	1.54704525958259	205.816181506273	147.613106536322	337.687671413075	118.404605788801	0.0032	0	0.5707	0	Core	0	7.69220525775621	6.89971467646545	-3.2764851241262
Chr1	6970000	6980000	10001	*	6.18818103833037	139.873554098251	340.487253067352	256.716548951173	156.67901080019	0.0032	0	0.5418	0	Core	0	7.1382569926763	7.30084682054491	-3.2764851241262
Chr1	6980000	6990000	10001	*	0.386761314895648	110.896390035343	151.835609111002	384.452548847989	954.399627819686	0.0041	0	0.5667	0	Core	0	6.8060196830853	9.89996050457553	-3.26395802625003
Chr1	6990000	7000000	10001	*	91.2756703153729	185.506061109028	499.302205276998	465.517955336977	495.926933504701	0.0026	0	0.5551	0	Core	0	7.54307870599169	8.95688992804154	-3.2848973639424
Chr1	7000000	7010000	10001	*	1.54704525958259	124.210222172355	195.70078048598	289.67824482062	54.4316716983384	0.0025	0	0.5449	0	Core	0	6.96820853858962	5.79263861170467	-3.28630418515664
Chr1	7010000	7020000	10001	*	255.649229146023	172.609917823373	227.875552170729	295.995274635417	800.919263724019	0.0029	0	0.5531	0	Core	0	7.43970555683068	9.64731318494843	-3.28068511265548
Chr1	7020000	7030000	10001	*	0.386761314895648	129.587966133579	127.163631257295	294.053023677435	400.131565533341	0.0034	0	0.5774	0	Core	0	7.02887814638868	8.64793168783089	-3.27369190923451
Chr1	7030000	7040000	10001	*	7.34846498301731	68.0832827712277	148.660008001119	310.288733141733	190.606536956713	0.0034	0	0.5955	0	Core	0	6.11026473486542	7.58200297148638	-3.27369190923451
Chr1	7040000	7050000	10001	*	0.386761314895648	95.9640135993225	108.633475330395	335.632279622589	240.855362964521	0.0029	1	0.6213	0	Core	0	6.59937751193252	7.91800071861302	-3.28068511265548
Chr1	7050000	7060000	10001	*	23.2056788937389	152.613064064646	232.132951460902	322.734224717154	2.18710885779361	0.0031	0	0.5858	0	Core	0	7.26315710544195	1.67224829615277	-3.27788376218134
Chr1	7060000	7070000	10001	*	1.54704525958259	205.033014909978	347.641079743462	313.381249230171	62.7700242186765	0.0035	2	0.5434	0	Core	0	7.68673172441877	5.99480652399395	-3.27229732716276
Chr1	7070000	7080000	10001	*	353.113080499727	177.361128507562	228.713073342567	306.74365372328	58.3958065030893	0.0033	0	0.5808	0	Core	0	7.47865742263467	5.89228917152346	-3.27508784068439
Chr1	7080000	7090000	10001	*	146.582538345451	228.162535053884	412.304693552399	284.511480136279	25.0697352824592	0.0032	0	0.5392	0	Core	0	7.84022739220293	4.70430402840823	-3.2764851241262
Chr1	7090000	7100000	10001	*	263.771216758832	1144.2063971867	760.05046344234	140.520913969747	0.246049746501781	0.0035	3	0.3616	0	Core	0	10.1613919191093	0.317361666755792	-3.27229732716276
Chr1	7100000	7110000	10001	*	224.708323954371	1718.05866784511	722.780771295581	45.6523259152924	0	0.0183	8	0.2192	0	Core	0	10.7474030664559	0	-3.07947802120966
Chr1	7110000	7120000	10001	*	397.977393027622	1760.71514178996	610.134173683466	48.0094265924553	6.15124366254452	0.0066	2	0.2572	0	Core	0	10.782764953103	2.8381941607387	-3.22972065679027
Chr1	7120000	7130000	10001	*	2.32056788937389	1131.2058316882	507.328449840438	169.560394312395	47.8703451249576	0.0041	7	0.3785	0	Core	0	10.1449205443881	5.61088738789648	-3.26395802625003
Chr1	7130000	7140000	10001	*	1.54704525958259	2593.43007807701	663.910012258518	40.1272819280224	0	0.0222	4	0.243	0	Core	0	11.3412019393012	0	-3.03268380973072
Chr1	7140000	7150000	10001	*	353.113080499727	1969.3507230429	701.42398141373	69.3176167140086	0	0.0108	5	0.304	0	Core	0	10.9442367373687	0	-3.17397021350026
Chr1	7150000	7160000	10001	*	1146.3605373507	2602.67144391329	693.921187582688	17.819681119352	0	0.0152	9	0.1924	0	Core	0	11.3463316916361	0	-3.11778737810714
Chr1	7160000	7170000	10001	*	921.652213396329	2474.17991101452	641.157353756939	27.0406589684136	0	0.0132	5	0.2025	0	Core	0	11.2733176774483	0	-3.14305413671757
Chr1	7170000	7180000	10001	*	64.9759009024689	2657.33647233467	685.05742184741	29.7937525593399	0	0.0154	2	0.2118	0	Core	0	11.3763080063742	0	-3.11528487090397
Chr1	7180000	7190000	10001	*	1.93380657447824	2758.93928542731	718.593165436395	27.5120791038462	0	0.0249	8	0.2245	0	Core	0	11.4304208148625	0	-3.00115461794149
Chr1	7190000	7200000	10001	*	1099.17565693343	2850.67419940664	698.28327701934	45.1243353636079	0	0.0181	6	0.2214	0	Core	0	11.4775934495611	0	-3.08191913015229
Chr1	7200000	7210000	10001	*	993.58981796692	2292.48526067413	685.894943019247	20.5727747102784	0	0.0176	3	0.2077	0	Core	0	11.1633259204793	0	-3.08804003471308
Chr1	7210000	7220000	10001	*	1093.37423721	2112.93126569694	670.889355357162	74.7106630633574	0.0546777214448402	0.0049	5	0.304	0	Core	0	11.0457127530335	0.0768022210143885	-3.25291341697218
Chr1	7220000	7230000	10001	*	132.659131009207	1401.45051851633	672.355017407878	72.014139888683	0.902182403839863	0.0061	3	0.2769	0	Core	0	10.4537341549967	0.927655595566344	-3.23650343863468
Chr1	7230000	7240000	10001	*	136.139982843268	977.861812133684	569.828467288796	128.414844891838	0.0273388607224201	0.0041	4	0.3487	0	Core	0	9.93496139585393	0.0389121232814827	-3.26395802625003
Chr1	7240000	7250000	10001	*	1.93380657447824	1754.4498090196	660.873998010608	18.5173829197923	0	0.0208	7	0.2011	0	Core	0	10.7776250326246	0	-3.04930764022437
Chr1	7250000	7260000	10001	*	0.773522629791296	777.997696759251	475.886509181047	166.279310169784	4.72962290497868	0.0042	3	0.3811	0	Core	0	9.60547525249181	2.51844019116026	-3.26257281727094
Chr1	7260000	7270000	10001	*	509.751413032464	178.561983955214	467.476400747181	298.088380036738	27.5575716081995	0.0034	0	0.5497	0	Core	0	7.48833813136434	4.83580139996303	-3.27369190923451
Chr1	7270000	7280000	10001	*	0.386761314895648	107.815934756584	77.6800886879086	398.21801680262	56.810152581189	0.0033	0	0.6367	0	Core	0	6.76574602679488	5.8532509750234	-3.27508784068439
Chr1	7280000	7290000	10001	*	0.773522629791296	79.0476151193549	90.6616668513866	426.710649788166	4.53825087992174	0.0034	0	0.6162	0	Core	0	6.32278651565846	2.46943040852985	-3.27369190923451
Chr1	7290000	7300000	10001	*	102.491748447347	69.9106714959156	71.9221306315273	414.359442239832	146.700326636506	0.0028	0	0.6008	0	Core	0	6.14793085289815	7.20652920637402	-3.28208783035557
Chr1	7300000	7310000	10001	*	450.963693168325	119.981122552363	127.303218119268	354.545655456145	131.855325264232	0.0034	0	0.5697	0	Core	0	6.91863814202866	7.05371224657057	-3.27369190923451
Chr1	7310000	7320000	10001	*	1.16028394468694	93.0401916398219	189.942822429599	267.163219152359	113.702321744545	0.003	0	0.5435	0	Core	0	6.55520557387765	6.84175078370424	-3.27928375747887
Chr1	7320000	7330000	10001	*	1.93380657447824	148.175120018976	247.487506277919	302.953435834402	70.6162772460111	0.0031	0	0.5661	0	Core	0	7.22086312738958	6.16221562138847	-3.27788376218134
Chr1	7330000	7340000	10001	*	1610.47411522548	142.014209461457	332.216731495458	325.072468588899	41.8557957660252	0.0033	1	0.5363	0	Core	0	7.1600146857374	5.42141842075317	-3.27508784068439
Chr1	7340000	7350000	10001	*	1.93380657447824	129.065855069383	298.052847027595	273.10311285881	400.432293001287	0.0033	0	0.5559	0	Core	0	7.02309846476296	8.64901286795719	-3.27508784068439
Chr1	7350000	7360000	10001	*	0	110.583123396825	277.708061895048	273.838528270085	262.042980024397	0.0028	0	0.5602	0	Core	0	6.80197503026729	8.03915473834912	-3.28208783035557
Chr1	7360000	7370000	10001	*	1282.11375887907	94.7109470452508	147.15944923491	299.351785999697	219.03895210803	0.0031	0	0.5889	0	Core	0	6.58061203887428	7.7816151273373	-3.27788376218134
Chr1	7370000	7380000	10001	*	969.223855128494	48.8695956087953	140.424383144719	355.035932396995	266.335181157817	0.0034	1	0.5725	0	Core	0	5.64008859916268	8.06250589769638	-3.27369190923451
Chr1	7380000	7390000	10001	*	1.54704525958259	126.037610897043	109.505893217726	327.768991763574	268.576967737055	0.0032	0	0.5838	0	Core	0	6.98911187591831	8.07455342979973	-3.2764851241262
Chr1	7390000	7400000	10001	*	0	82.6501814623109	139.272791533443	342.194447907811	354.530345848344	0.003	0	0.5749	0	Core	0	6.38629676479226	8.47382889430712	-3.27928375747887
Chr1	7400000	7410000	10001	*	0.386761314895648	124.94117766223	173.855436587224	380.907469429536	11.8650655535303	0.0027	0	0.5554	0	Core	0	6.97660625278579	3.68538690318427	-3.28349191323125
Chr1	7410000	7420000	10001	*	1.16028394468694	167.284384968569	197.480512976134	316.756617399868	60.5829153608829	0.0029	1	0.5649	0	Core	0	7.3947575056372	5.94445826167136	-3.28068511265548
Chr1	7420000	7430000	10001	*	6.96170366812166	53.2031174416266	98.8274982768002	300.916900849333	22.581898956719	0.0032	0	0.6039	0	Core	0	5.76030392410926	4.55960799238796	-3.2764851241262
Chr1	7430000	7440000	10001	*	12.3763620766607	109.643323481272	103.817728592331	322.979363187578	218.738224640083	0.0032	0	0.584	0	Core	0	6.78977258740195	7.77964204588956	-3.2764851241262
Chr1	7440000	7450000	10001	*	1.16028394468694	172.923184461891	156.651355849066	329.522674667383	57.9037070100858	0.003	0	0.5614	0	Core	0	7.44230645064655	5.88028652549279	-3.27928375747887
Chr1	7450000	7460000	10001	*	670.257358714158	143.00622048343	201.249358249402	314.267519084784	220.487911726318	0.0038	0	0.5484	0	Core	0	7.16998732135042	7.79108415190313	-3.26812165119157
Chr1	7460000	7470000	10001	*	109.840213430364	113.872423101263	167.783408091404	334.595155324638	94.3737472137942	0.0027	0	0.5549	0	Core	0	6.84388868810534	6.57552029637249	-3.28349191323125
Chr1	7470000	7480000	10001	*	1.54704525958259	154.544875002173	440.047582369509	347.09721731631	1.66767050406763	0.0034	0	0.5562	0	Core	0	7.28118705053737	1.41558048380006	-3.27369190923451
Chr1	7480000	7490000	10001	*	0.773522629791296	200.699493077147	763.575031707156	330.635226187004	14.1341909934912	0.0037	0	0.538	0	Core	0	7.65606364786538	3.91973965205655	-3.26951220073622
Chr1	7490000	7500000	10001	*	910.436135264355	207.330303592443	974.072019562261	265.40953624855	32.9706660312386	0.0035	0	0.5135	0	Core	0	7.70272889791337	5.08621759896098	-3.27229732716276
Chr1	7500000	7510000	10001	*	206.917303469172	401.555619473552	871.685056305153	230.845011918632	13.4780583361531	0.0062	3	0.4935	0	Core	0	8.65304431808288	3.85579622930903	-3.2351443287453
Chr1	7510000	7520000	10001	*	240.565537865093	579.282225726051	578.622439593088	210.517375678779	0.0273388607224201	0.0051	5	0.4594	0	Core	0	9.18061092902339	0.0389121232814827	-3.25016542558727
Chr1	7520000	7530000	10001	*	356.207171018892	1033.57106268345	789.503291318618	142.519735343982	17.5515485837937	0.0171	3	0.3782	0	Core	0	10.0148170291929	4.21346771520569	-3.09418701904823
Chr1	7530000	7540000	10001	*	489.253063342995	100.349746538573	530.883732798362	250.437232747211	53.2014229658295	0.0037	0	0.5234	0	Core	0	6.66319867060716	5.76025882245908	-3.26951220073622
Chr1	7540000	7550000	10001	*	2.70732920426954	131.571988177526	149.253252164504	310.251019530898	63.6175289010716	0.0026	0	0.5715	0	Core	0	7.05063216291335	6.01385367510476	-3.2848973639424
Chr1	7550000	7560000	10001	*	0.773522629791296	136.94973213875	137.353472181316	288.546836495582	187.243857087855	0.0033	0	0.6099	0	Core	0	7.10799884514317	7.55645897635327	-3.27508784068439
Chr1	7560000	7570000	10001	*	0.773522629791296	87.29696993366	185.825010001399	309.760742590049	55.0331266342317	0.0029	1	0.5742	0	Core	0	6.46429202498434	5.80820809171833	-3.28068511265548
Chr1	7570000	7580000	10001	*	808.331148131904	115.96086735805	124.197410440371	348.473764111773	48.7725275287974	0.003	0	0.5899	0	Core	0	6.86988210495094	5.63727774613122	-3.27928375747887
Chr1	7580000	7590000	10001	*	897.673011872799	145.512353591573	361.809146233709	305.517961371155	476.59835897395	0.0019	0	0.5677	0	Core	0	7.19487850434651	8.89965406929157	-3.29477404338364
Chr1	7590000	7600000	10001	*	1405.49061833078	89.6986808289641	308.766138684014	335.651136428007	46.858807278228	0.0034	1	0.5646	0	Core	0	6.50300966245095	5.5807125378309	-3.27369190923451
Chr1	7600000	7610000	10001	*	1.54704525958259	84.4253590805791	123.953133431919	314.097807836028	302.85989908297	0.0028	0	0.5969	0	Core	0	6.4165925018402	8.24726248223456	-3.28208783035557
Chr1	7610000	7620000	10001	*	931.708007583616	53.4119618673052	234.401237967961	278.081309488978	577.888837950516	0.0036	0	0.5663	0	Core	0	5.76585194175978	9.17714252877598	-3.2709040918629
Chr1	7620000	7630000	10001	*	1.16028394468694	136.479832180973	116.555029747356	413.11489308229	219.968473372592	0.0034	0	0.5798	0	Core	0	7.10307618552814	7.78769673788228	-3.27369190923451
Chr1	7630000	7640000	10001	*	0.386761314895648	229.102334969438	345.547276813868	334.557441713803	198.616823148382	0.0034	1	0.5272	0	Core	0	7.84613181319651	7.64108950188267	-3.27369190923451
Chr1	7640000	7650000	10001	*	151.99719675399	150.315775382181	582.705355305794	303.971703326936	302.586510475746	0.0032	1	0.5481	0	Core	0	7.24141859292244	8.24596387742498	-3.2764851241262
Chr1	7650000	7660000	10001	*	1254.65370552148	141.43988729084	916.7367160069	297.673530317557	870.688036287635	0.003	1	0.5162	0	Core	0	7.15420938901989	9.76766809882802	-3.27928375747887
Chr1	7660000	7670000	10001	*	31.7144278214431	104.735479477824	499.162618415025	336.179126979691	3068.29501659865	0.0034	1	0.5403	0	Core	0	6.7243157432032	11.5836916070804	-3.27369190923451
Chr1	7670000	7680000	10001	*	0.773522629791296	96.32949134426	296.098630959975	323.903346653026	30.8929126163347	0.003	0	0.5985	0	Core	0	6.60480511026865	4.99516395244185	-3.27928375747887
Chr1	7680000	7690000	10001	*	1.16028394468694	93.8755693425363	224.839537922819	289.150254268936	49.5106767683028	0.0027	2	0.5814	0	Core	0	6.56796473296687	5.65851646676405	-3.28349191323125
Chr1	7690000	7700000	10001	*	1.54704525958259	91.7349139793306	135.99250027708	359.995272221746	208.158085540507	0.0038	0	0.582	0	Core	0	6.53504069955961	7.70844995989972	-3.26812165119157
Chr1	7700000	7710000	10001	*	1167.24564835507	173.393084419668	231.714190874984	306.649369696193	45.8472694314985	0.0026	0	0.5604	0	Core	0	7.44619902076532	5.54989305541985	-3.2848973639424
Chr1	7710000	7720000	10001	*	0.386761314895648	223.202479944017	572.829584821213	258.885081574163	112.390056429869	0.0035	3	0.5351	0	Core	0	7.80865842591605	6.8251503206342	-3.27229732716276
Chr1	7720000	7730000	10001	*	159.732423051903	405.680296880705	462.102306561225	183.269291850775	16.1299278262279	0.007	3	0.4499	0	Core	0	8.66775128561269	4.09844716779424	-3.22431729826094
Chr1	7730000	7740000	10001	*	989.722204817963	205.085226016398	286.676517776806	220.586909771619	143.775068539207	0.0043	1	0.5043	0	Core	0	7.68709727341532	7.17766936960119	-3.26118893702968
Chr1	7740000	7750000	10001	*	0.773522629791296	89.7508919353837	94.0815449697222	284.681191385035	226.502461085251	0.0027	0	0.5914	0	Core	0	6.50383991743852	7.82973834201477	-3.28349191323125
Chr1	7750000	7760000	10001	*	972.704706962554	99.1488910909213	121.929123933312	290.319376204808	138.443990698335	0.0031	0	0.5863	0	Core	0	6.64600263662194	7.12354195292177	-3.27788376218134
Chr1	7760000	7770000	10001	*	1.54704525958259	104.474423945726	115.717508575519	322.809651938823	129.0120837491	0.0027	1	0.5957	0	Core	0	6.72074939799647	7.02250190806484	-3.28349191323125
Chr1	7770000	7780000	10001	*	1.16028394468694	35.8690301103017	113.728395792405	288.358268441409	70.2061943351748	0.0032	0	0.5892	0	Core	0	5.20433755977414	6.15393084377462	-3.2764851241262
Chr1	7780000	7790000	10001	*	0	163.681818625613	157.977431037809	289.772528847707	115.534025412947	0.0029	0	0.5506	0	Core	0	7.36353747570385	6.86460744188575	-3.28068511265548
Chr1	7790000	7800000	10001	*	931.32124626872	82.5457592494716	258.410178227297	283.926919168342	245.749019033834	0.0028	0	0.5593	0	Core	0	6.3844946943883	7.94690053894339	-3.28208783035557
Chr1	7800000	7810000	10001	*	1.16028394468694	128.387110685927	430.206708600421	238.953438248073	361.93917710412	0.004	1	0.5335	0	Core	0	7.01555009554656	8.50358398526155	-3.26534456652099
Chr1	7810000	7820000	10001	*	362.008590742326	152.769697383905	206.065104987466	298.918079475099	232.70838246924	0.003	1	0.5548	0	Core	0	7.26462741647323	7.86856567027939	-3.27928375747887
Chr1	7820000	7830000	10001	*	1.54704525958259	160.810207772532	397.57827961426	260.035346704619	14.3255630185481	0.0029	0	0.5588	0	Core	0	7.33815881261236	3.93786817037908	-3.28068511265548
Chr1	7830000	7840000	10001	*	0.773522629791296	53.0986952287872	95.7216905979036	280.966400717826	135.245343993812	0.0029	0	0.6191	0	Core	0	5.75752189393653	7.09006311829319	-3.28068511265548
Chr1	7840000	7850000	10001	*	326.039788457031	107.763723650164	464.231006206311	251.926920375178	76.3574379977193	0.0031	0	0.5469	0	Core	0	6.7650536394062	6.27346810985218	-3.27788376218134
Chr1	7850000	7860000	10001	*	454.831306317282	100.715224283511	110.762174975482	264.523266393937	630.980905473456	0.0028	0	0.578	0	Core	0	6.66839182132514	9.30373715957757	-3.28208783035557
Chr1	7860000	7870000	10001	*	0.773522629791296	113.559156462746	133.410143330582	281.136111966581	1034.66652290071	0.0027	1	0.5838	0	Core	0	6.83994896448417	10.0163438251331	-3.28349191323125
Chr1	7870000	7880000	10001	*	365.489442576387	143.998231505403	278.720066644351	252.341770094359	64.4103558620218	0.0028	0	0.5566	0	Core	0	7.1798914940567	6.03144715825646	-3.28208783035557
Chr1	7880000	7890000	10001	*	397.590631712726	53.1509063352069	115.159161127627	278.83558170567	866.040429964824	0.003	0	0.5739	0	Core	0	5.75891357961599	9.75995545744308	-3.27928375747887
Chr1	7890000	7900000	10001	*	3.09409051916518	70.3283603472728	109.401203071246	280.51383738781	261.988302302952	0.0032	0	0.5717	0	Core	0	6.15640390503853	8.03885481976819	-3.2764851241262
Chr1	7900000	7910000	10001	*	975.412036166824	43.7006960732497	72.8643419498442	328.447836758597	104.680497706147	0.0029	0	0.6109	0	Core	0	5.48222539192474	6.72356535591285	-3.28068511265548
Chr1	7910000	7920000	10001	*	13.149884706452	89.9597363610624	144.751575865878	260.280485175044	300.9461788324	0.0035	0	0.564	0	Core	0	6.50715616759664	8.23814760537998	-3.27229732716276
Chr1	7920000	7930000	10001	*	0.386761314895648	51.1146731848404	125.80265935306	303.59456721859	103.750976441584	0.0032	0	0.6053	0	Core	0	5.70361772364079	6.71081988191764	-3.2764851241262
Chr1	7930000	7940000	10001	*	767.721210067861	67.1956939620936	118.509245814977	355.6959205866	68.2924740846054	0.003	0	0.5869	0	Core	0	6.09160874182509	6.11462676340536	-3.27928375747887
Chr1	7940000	7950000	10001	*	2.32056788937389	118.989111530389	128.280326153078	276.289912974334	648.833181525196	0.0034	0	0.57	0	Core	0	6.90675968349321	9.34392560164718	-3.27369190923451
Chr1	7950000	7960000	10001	*	0.773522629791296	115.96086735805	121.405673200914	266.239235686912	88.9879916514774	0.003	0	0.5727	0	Core	0	6.86988210495094	6.49166059032158	-3.27928375747887
Chr1	7960000	7970000	10001	*	1.16028394468694	41.1945629651063	111.529902716332	286.925151229694	405.872726285049	0.0028	0	0.5756	0	Core	0	5.39898520546367	8.66843376590504	-3.28208783035557
Chr1	7970000	7980000	10001	*	723.630420169757	79.5175150771317	105.702151228965	274.234521183848	184.072549244055	0.0037	0	0.5777	0	Core	0	6.33123074353486	7.53194711412219	-3.26951220073622
Chr1	7980000	7990000	10001	*	1.16028394468694	114.655589697558	121.266086338941	347.530923840908	161.353955983723	0.0035	0	0.5931	0	Core	0	6.85369118366988	7.34299872813181	-3.27229732716276
Chr1	7990000	8000000	10001	*	0	103.84789066869	90.7663569978663	259.356501709596	1257.53291550988	0.0032	0	0.6063	0	Core	0	6.71215402734246	10.2975272337171	-3.2764851241262
Chr1	8000000	8010000	10001	*	0.386761314895648	86.1483255924277	143.704674401082	284.304055276689	3807.12772762206	0.0035	0	0.5703	0	Core	0	6.44540104056125	11.8948661532545	-3.27229732716276
Chr1	8010000	8020000	10001	*	5.80141972343472	123.061577831122	129.048053893929	263.636996539324	600.087992857121	0.003	0	0.586	0	Core	0	6.95491256829502	9.23143239130406	-3.27928375747887
Chr1	8020000	8030000	10001	*	1.16028394468694	55.0827172727341	87.7303427499561	307.02650580454	170.785862932958	0.0029	0	0.6099	0	Core	0	5.80948434617826	7.42446750497223	-3.28068511265548
Chr1	8030000	8040000	10001	*	1.93380657447824	98.2613022817872	112.123146879717	258.432518244148	146.946376383008	0.0032	0	0.5569	0	Core	0	6.63315947742036	7.20893055113735	-3.2764851241262
Chr1	8040000	8050000	10001	*	1.54704525958259	61.9745833201283	122.278091088244	329.522674667383	149.543568151638	0.0033	0	0.5853	0	Core	0	5.97669776609105	7.2340372612119	-3.27508784068439
Chr1	8050000	8060000	10001	*	1.93380657447824	42.604262838437	111.564799431826	308.667047875845	905.709116873055	0.0032	0	0.5832	0	Core	0	5.44639727748696	9.82449598093338	-3.2764851241262
Chr1	8060000	8070000	10001	*	264.544739388623	102.647035221038	90.5918734204002	280.985257523243	373.503515189703	0.0028	0	0.6078	0	Core	0	6.69553503913976	8.54883545004207	-3.28208783035557
Chr1	8070000	8080000	10001	*	0.773522629791296	77.5334930331849	140.284796282746	269.53917663494	215.894983124952	0.0025	0	0.5599	0	Core	0	6.29523616198191	7.7608528730087	-3.28630418515664
Chr1	8080000	8090000	10001	*	443.228466870412	99.2533133037606	126.046936361512	318.340589054922	126.578925144805	0.0037	0	0.5774	0	Core	0	6.64750610733187	6.99524621871907	-3.26951220073622
Chr1	8090000	8100000	10001	*	616.884297258558	110.478701183986	141.401491178529	300.973471265585	1237.38417515746	0.0027	0	0.5577	0	Core	0	6.80062428887611	10.2742432257211	-3.28349191323125
Chr1	8100000	8110000	10001	*	0.386761314895648	107.189401479548	133.061176175649	263.844421398914	28.5144317334842	0.0034	0	0.5714	0	Core	0	6.75741536563245	4.8833486595027	-3.27369190923451
Chr1	8110000	8120000	10001	*	0	62.9665943421017	120.463461882597	291.469641335264	153.261653209887	0.0033	0	0.5751	0	Core	0	5.99924676938806	7.26923566711112	-3.27508784068439
Chr1	8120000	8130000	10001	*	3.09409051916518	68.8664493675225	153.475754739183	275.875063255154	79.8021344487443	0.0034	0	0.5627	0	Core	0	6.12652791885519	6.33632149823505	-3.27369190923451
Chr1	8130000	8140000	10001	*	382.1201791169	153.135175128843	140.389486429226	243.497928353643	60.2275101714915	0.003	0	0.5635	0	Core	0	7.26805232607926	5.93610811169993	-3.27928375747887
Chr1	8140000	8150000	10001	*	490.413347287682	119.511222594586	347.047835580077	251.719495515588	11.1815940354698	0.003	0	0.5399	0	Core	0	6.91302369330589	3.60663102588164	-3.27928375747887
Chr1	8150000	8160000	10001	*	0.773522629791296	66.4125273657988	118.43945238399	288.905115798511	22.1718160458827	0.003	1	0.5844	0	Core	0	6.07494480927859	4.53429921193074	-3.27928375747887
Chr1	8160000	8170000	10001	*	263.384455443936	113.037045398549	99.9790898880765	310.722439666331	821.860831037393	0.0034	0	0.5934	0	Core	0	6.83335875566375	9.68450464065263	-3.27369190923451
Chr1	8170000	8180000	10001	*	336.095582644318	79.2564595450335	127.75687542068	291.507354946099	220.870655776432	0.0026	0	0.5722	0	Core	0	6.32654560897332	7.79357506161223	-3.2848973639424
Chr1	8180000	8190000	10001	*	461.019487355612	86.9837032951421	286.467137483846	272.575122307126	30.2914576804415	0.003	2	0.5648	0	Core	0	6.45916442144905	4.96769696149945	-3.27928375747887
Chr1	8190000	8200000	10001	*	119.509246302755	187.698927578653	490.054575671294	254.416018690262	32.2871945131781	0.0036	1	0.5017	0	Core	0	7.55994241355381	5.0568953783279	-3.2709040918629
Chr1	8200000	8210000	10001	*	1.54704525958259	41.090140752267	131.351237116482	317.492032811143	485.100744658622	0.003	0	0.5659	0	Core	0	5.39541042904383	8.92511153397009	-3.27928375747887
Chr1	8210000	8220000	10001	*	1348.24994372623	25.2701755071121	97.85039024299	337.706528218493	64.9844719371926	0.0038	0	0.5925	0	Core	0	4.71535393382082	6.04405465125313	-3.26812165119157
Chr1	8220000	8230000	10001	*	0.773522629791296	64.5851386411109	94.674789133107	289.489676766447	111.925295797588	0.0033	0	0.6072	0	Core	0	6.03529703720409	6.81922488256414	-3.27508784068439
Chr1	8230000	8240000	10001	*	539.145272964533	103.952312881529	159.72226681247	312.721261040565	389.934170483878	0.0027	0	0.5759	0	Core	0	6.71359015007745	8.61078188193094	-3.28349191323125
Chr1	8240000	8250000	10001	*	0	68.8142382611028	127.582391843214	249.682960530519	560.09123962022	0.0032	0	0.5651	0	Core	0	6.12544939169302	9.13209157780081	-3.2764851241262
Chr1	8250000	8260000	10001	*	1.16028394468694	130.318921623454	119.695734141746	301.275180152262	81.4424660920895	0.0031	0	0.5739	0	Core	0	7.03693099759385	6.36531575558228	-3.27788376218134
Chr1	8260000	8270000	10001	*	0	116.535189528666	113.588808930432	292.789617714475	74.5530731900396	0.0029	0	0.5817	0	Core	0	6.87694894790896	6.23941853440529	-3.28068511265548
Chr1	8270000	8280000	10001	*	6.96170366812166	139.612498566153	109.994447234631	290.243948983139	64.9844719371926	0.0028	0	0.5803	0	Core	0	7.13558102613395	6.04405465125313	-3.28208783035557
Chr1	8280000	8290000	10001	*	1.16028394468694	77.8989707781225	135.573739691161	240.971116427725	339.630666754625	0.0029	0	0.5449	0	Core	0	6.30193457556991	8.41206451552278	-3.28068511265548
Chr1	8290000	8300000	10001	*	244.43315101405	124.314644385194	290.759433489512	201.352968245969	126.278197676858	0.0026	2	0.5149	0	Core	0	6.96941120896256	6.99184150141531	-3.2848973639424
Chr1	8300000	8310000	10001	*	1.16028394468694	133.503799115053	255.199680401921	319.773706266637	723.331576993791	0.0031	2	0.5694	0	Core	0	7.07150311264614	9.5005064602566	-3.27788376218134
Chr1	8310000	8320000	10001	*	429.691820849065	61.870161107289	133.026279460156	296.127272273338	146.098871700613	0.003	0	0.5998	0	Core	0	5.97430355497191	7.20064237043835	-3.27928375747887
Chr1	8320000	8330000	10001	*	1.54704525958259	92.3092361499468	123.74375313896	284.15320083335	76.6034877442211	0.0037	0	0.5913	0	Core	0	6.54394798719937	6.27804958799846	-3.26951220073622
Chr1	8330000	8340000	10001	*	1.16028394468694	94.1366248746346	132.293448434799	355.262214062002	661.463735178954	0.0029	0	0.561	0	Core	0	6.57192893915978	9.37169766998398	-3.28068511265548
Chr1	8340000	8350000	10001	*	0.386761314895648	34.4593302369711	105.178700496566	302.218020423127	209.142284526514	0.0029	0	0.5786	0	Core	0	5.14809338146446	7.71522267800539	-3.28068511265548
Chr1	8350000	8360000	10001	*	0.773522629791296	99.201102197341	170.121488029449	263.090149182222	167.942621417827	0.0029	2	0.5612	0	Core	0	6.64675456782773	7.40038953183389	-3.28068511265548
Chr1	8360000	8370000	10001	*	1.93380657447824	132.250732560981	152.114782834948	313.098397148911	60.8836428288296	0.0029	0	0.565	0	Core	0	7.05799965416023	5.95148621954115	-3.28068511265548
Chr1	8370000	8380000	10001	*	922.038974711225	82.3891259302126	137.981613060193	319.641708628716	108.589954789453	0.003	0	0.5586	0	Core	0	6.38178736117865	6.77597175413511	-3.27928375747887
Chr1	8380000	8390000	10001	*	0.386761314895648	139.299231927635	131.7699977024	332.275768258309	112.034651240478	0.0033	0	0.5722	0	Core	0	7.13236330067676	6.82062129435779	-3.27508784068439
Chr1	8390000	8400000	10001	*	0.773522629791296	121.704089064211	114.810193972695	293.694744374506	73.8149239505343	0.0033	0	0.571	0	Core	0	6.93903951680621	6.22525417999799	-3.27508784068439
Chr1	8400000	8410000	10001	*	0.773522629791296	85.1563145704543	106.888639555734	309.270465649199	88.1678258298048	0.0026	0	0.5881	0	Core	0	6.42888463324851	6.47845133542389	-3.2848973639424
Chr1	8410000	8420000	10001	*	0.773522629791296	120.39881140372	130.443922513658	268.634049974909	49.4833379075804	0.0034	0	0.5553	0	Core	0	6.92361048624185	5.65773539790808	-3.27369190923451
Chr1	8420000	8430000	10001	*	700.424741276018	100.297535432154	136.515951009478	309.270465649199	544.398733565551	0.0028	0	0.5653	0	Core	0	6.66245526358738	9.09116754004473	-3.28208783035557
Chr1	8430000	8440000	10001	*	369.743817040239	48.3474845445988	108.493888468422	300.407767103066	52.0805296762103	0.0028	0	0.5819	0	Core	0	5.62490464101736	5.73011086192985	-3.28208783035557
Chr1	8440000	8450000	10001	*	0.773522629791296	74.0353489030682	104.969320203607	320.961685007927	95.0572187318547	0.0028	0	0.5811	0	Core	0	6.22949849946722	6.58582213186317	-3.28208783035557
Chr1	8450000	8460000	10001	*	445.935796074682	83.0678703136681	133.305453184102	299.879776551381	285.281011638454	0.003	0	0.5583	0	Core	0	6.39348262074423	8.16128817263898	-3.27928375747887
Chr1	8460000	8470000	10001	*	0.386761314895648	93.6667249168577	134.387251364392	353.244535882351	176.636379127556	0.0035	0	0.5597	0	Core	0	6.56478550650081	7.47278325914466	-3.27229732716276
Chr1	8470000	8480000	10001	*	874.080571664164	115.647600719532	141.541078040502	352.490263665659	207.037192250887	0.0039	0	0.5746	0	Core	0	6.86601282315229	7.7006976617916	-3.26673244064524
Chr1	8480000	8490000	10001	*	0.773522629791296	75.9149487341757	110.517897967029	274.78136854095	307.698877430838	0.0034	0	0.587	0	Core	0	6.26519211399464	8.27005642644364	-3.27369190923451
Chr1	8490000	8500000	10001	*	4.64113577874777	124.210222172355	148.590214570133	310.741296471748	77.7243810338403	0.0026	0	0.5672	0	Core	0	6.96820853858962	6.29873860418143	-3.2848973639424
Chr1	8500000	8510000	10001	*	1.54704525958259	91.369436234393	148.136557268721	263.014721960553	1580.59623266672	0.0028	0	0.5478	0	Core	0	6.5293436577046	10.6271656243728	-3.28208783035557
Chr1	8510000	8520000	10001	*	1.93380657447824	45.8935625428751	118.125381944551	289.489676766447	298.513020228105	0.0031	0	0.5779	0	Core	0	5.55131798084952	8.22647491001825	-3.27788376218134
Chr1	8520000	8530000	10001	*	1.16028394468694	66.3603162593791	169.249070142119	332.219197842057	232.954432215742	0.0032	0	0.5784	0	Core	0	6.07382700681849	7.87008375027505	-3.2764851241262
Chr1	8530000	8540000	10001	*	225.481846584163	91.5782806600716	222.152490829841	271.349429955001	283.777374298721	0.0028	1	0.5853	0	Core	0	6.53260186440611	8.15369071780759	-3.28208783035557
Chr1	8540000	8550000	10001	*	218.906904230937	157.051008110317	921.552462744964	215.156149811436	72.9947581288617	0.0028	2	0.5062	0	Core	0	7.30424642711214	6.20935116712415	-3.28208783035557
Chr1	8550000	8560000	10001	*	1.54704525958259	128.387110685927	676.61241669805	232.994687736205	12.3845039072563	0.0032	1	0.5152	0	Core	0	7.01555009554656	3.74249176178501	-3.2764851241262
Chr1	8560000	8570000	10001	*	0.386761314895648	90.5340585316785	134.561734941858	297.37182143088	89.9721906374845	0.0028	0	0.5816	0	Core	0	6.51623674464687	6.50735368897903	-3.28208783035557
Chr1	8570000	8580000	10001	*	742.96848591454	177.465550720401	166.841196773087	372.27105254841	508.776198044238	0.0029	0	0.5596	0	Core	0	7.47950180687886	8.99372020384651	-3.28068511265548
Chr1	8580000	8590000	10001	*	45.2510738427908	96.9038135148762	205.681241117041	259.450785736682	226.529799945973	0.003	0	0.5292	0	Core	0	6.61329315116013	7.82991169956417	-3.27928375747887
Chr1	8590000	8600000	10001	*	2.32056788937389	63.5931276191375	123.010922113602	357.751312377087	427.033004484202	0.0027	0	0.5984	0	Core	0	6.01330877254325	8.74157823305977	-3.28349191323125
Chr1	8600000	8610000	10001	*	0.773522629791296	88.3934031684728	241.415477782099	305.800813452415	60.8016262466623	0.0029	0	0.542	0	Core	0	6.48209646581178	5.94957289656274	-3.28068511265548
Chr1	8610000	8620000	10001	*	473.009088117377	110.269856758307	128.070945860119	289.847956069376	163.431709398627	0.0028	0	0.5788	0	Core	0	6.79791900621737	7.36134472833743	-3.28208783035557
Chr1	8620000	8630000	10001	*	103.652032392034	73.2521823067733	119.311870271321	335.877418093014	107.496400360556	0.0029	0	0.5797	0	Core	0	6.2143615229138	6.76150336822215	-3.28068511265548
Chr1	8630000	8640000	10001	*	2.70732920426954	71.9991157527017	136.515951009478	417.866808047451	39.7507034903988	0.0036	0	0.5772	0	Core	0	6.18980708344278	5.34875306008014	-3.2709040918629
Chr1	8640000	8650000	10001	*	0.386761314895648	102.751457433877	138.609753939071	384.018842323391	347.640952946294	0.0029	0	0.5755	0	Core	0	6.69698779243052	8.44559823468966	-3.28068511265548
Chr1	8650000	8660000	10001	*	278.081385409971	102.594824114618	135.748223268627	298.748368226343	168.216010025051	0.0038	1	0.5645	0	Core	0	6.69480811354523	7.40272226231678	-3.26812165119157
Chr1	8660000	8670000	10001	*	0.773522629791296	116.482978422246	154.138792333555	286.548015121348	145.579433346887	0.0029	0	0.5626	0	Core	0	6.87630793614202	7.19553888199158	-3.28068511265548
Chr1	8670000	8680000	10001	*	190.286566928659	158.147441345129	205.960414840987	274.121380351344	151.457288402207	0.0037	0	0.538	0	Core	0	7.31422015235103	7.25226131152532	-3.26951220073622
Chr1	8680000	8690000	10001	*	910.822896579251	268.208453677758	1036.78141730358	194.187382187394	151.293255237873	0.0045	1	0.5003	0	Core	0	8.07257990391124	7.25070823895157	-3.2584251525812
Chr1	8690000	8700000	10001	*	0.773522629791296	105.100957222762	630.304475238547	266.786083044013	10.3340893530748	0.0033	0	0.5602	0	Core	0	6.72929386180782	3.50259657607809	-3.27508784068439
Chr1	8700000	8710000	10001	*	39.4496541193561	235.680934378314	827.087053904817	230.222737339861	46.8861461389505	0.0033	0	0.5128	0	Core	0	7.88679968551483	5.58153642751808	-3.27508784068439
Chr1	8710000	8720000	10001	*	2.32056788937389	191.614760560127	388.400443439543	262.845010711797	5.87785505532032	0.0029	1	0.5715	0	Core	0	7.58957445459125	2.78195871266988	-3.28068511265548
Chr1	8720000	8730000	10001	*	778.163765570044	97.7391912175907	121.4754666319	311.099575774677	76.3300991369969	0.0034	0	0.6183	0	Core	0	6.62555092275805	6.27295815746779	-3.27369190923451
Chr1	8730000	8740000	10001	*	467.207668393943	86.6704366566242	143.809364547561	323.52621054468	59.024600299705	0.0039	0	0.5886	0	Core	0	6.45401852844421	5.90748198655333	-3.26673244064524
Chr1	8740000	8750000	10001	*	1.16028394468694	172.505495610534	552.275419395706	253.850314527743	3.66340733680429	0.0037	4	0.5475	0	Core	0	7.43883754920362	2.2213844509348	-3.26951220073622
Chr1	8750000	8760000	10001	*	53.3730614555994	138.620487544179	320.561228520723	309.779599395466	48.1710725929042	0.0027	2	0.5787	0	Core	0	7.12536684414251	5.61973792060896	-3.28349191323125
Chr1	8760000	8770000	10001	*	0.386761314895648	66.4647384722184	217.790401393189	282.26752029162	69.1946564884453	0.0031	0	0.5667	0	Core	0	6.076061746334	6.13328930560187	-3.27788376218134
Chr1	8770000	8780000	10001	*	0	59.0507613606277	383.654490132465	298.804938642595	35.403824635534	0.0026	0	0.5743	0	Core	0	5.90811063231267	5.18601812478537	-3.2848973639424
Chr1	8780000	8790000	10001	*	480.74431441529	132.772843625178	628.664329610366	235.370645218785	78.872613184182	0.003	3	0.5304	0	Core	0	7.06364146312562	6.31962900985099	-3.27928375747887
Chr1	8790000	8800000	10001	*	979.666410630676	78.2644485230601	156.232595263148	379.625206661159	1197.05935559189	0.003	0	0.5708	0	Core	0	6.30860203219151	10.2264836701651	-3.27928375747887
Chr1	8800000	8810000	10001	*	548.427544522029	23.9126867402011	140.249899567253	321.225680283769	1197.98887685645	0.0033	1	0.5823	0	Core	0	4.63880871412741	10.2276025594455	-3.27508784068439
Chr1	8810000	8820000	10001	*	1.16028394468694	86.096114486008	197.131545821202	282.022381821195	89.8901740553173	0.0029	1	0.5762	0	Core	0	6.44453645393189	6.50605243102403	-3.28068511265548
Chr1	8820000	8830000	10001	*	2.32056788937389	139.194809714795	257.712243917433	297.390678236297	36.8527842538223	0.0036	1	0.5421	0	Core	0	7.13128912872858	5.24232751614064	-3.2709040918629
Chr1	8830000	8840000	10001	*	152.383958068885	113.872423101263	273.311075742902	301.897454731033	11.8924044142527	0.003	1	0.5414	0	Core	0	6.84388868810534	3.68844944415963	-3.27928375747887
Chr1	8840000	8850000	10001	*	701.971786535601	51.1668842912601	117.916001651592	299.559210859287	519.520370308149	0.0033	0	0.5993	0	Core	0	5.70506236471498	9.02381081356358	-3.27508784068439
Chr1	8850000	8860000	10001	*	858.610119068338	54.2473395700196	128.559499877024	290.65879870232	139.674239430844	0.003	0	0.5763	0	Core	0	5.78783308823213	7.13621435311819	-3.27928375747887
Chr1	8860000	8870000	10001	*	1.93380657447824	116.013078464469	254.955403393468	317.529746421978	53.0647286622174	0.0033	0	0.5603	0	Core	0	6.87052597754365	5.75661579468423	-3.27508784068439
Chr1	8870000	8880000	10001	*	949.885789383711	43.5962738604104	264.62179358509	276.931044358523	150.500428276923	0.0029	0	0.5601	0	Core	0	5.47885126898635	7.24317806183677	-3.28068511265548
Chr1	8880000	8890000	10001	*	693.463037607897	78.2644485230601	523.799699553238	270.953437041237	201.268692638457	0.0035	1	0.5559	0	Core	0	6.30860203219151	7.66012922509081	-3.27229732716276
Chr1	8890000	8900000	10001	*	1349.02346635602	174.750573186579	406.372251918552	266.522087768171	99.2127255616625	0.0032	1	0.5509	0	Core	0	7.45738558423377	6.64692191127176	-3.2764851241262
Chr1	8900000	8910000	10001	*	0	93.2490360655005	123.255199122054	335.292857125078	232.270960697681	0.004	2	0.5991	0	Core	0	6.55840595814258	7.86586291087725	-3.26534456652099
Chr1	8910000	8920000	10001	*	1.54704525958259	37.0698855579537	88.7423474992595	362.408943315161	37.7823055183846	0.0028	0	0.6486	0	Core	0	5.25057832790231	5.27732666576559	-3.28208783035557
Chr1	8920000	8930000	10001	*	1.16028394468694	110.530912290406	146.461514925046	297.767814344643	34.7750308389184	0.0033	0	0.565	0	Core	0	6.80129981765277	5.16088110547691	-3.27508784068439
Chr1	8930000	8940000	10001	*	470.301758913108	84.1643035484809	252.093872723024	292.733047298223	277.21604772534	0.0032	0	0.5423	0	Core	0	6.41217694922406	8.12006182786494	-3.2764851241262
Chr1	8940000	8950000	10001	*	370.130578355135	92.9879805334022	353.084967360404	295.467284083732	1180.82007232277	0.0035	0	0.5445	0	Core	0	6.55440436727785	10.2067946919823	-3.27229732716276
Chr1	8950000	8960000	10001	*	1.16028394468694	179.08409501941	363.344601715411	290.262805788556	176.636379127556	0.0038	0	0.5511	0	Core	0	7.49252695819334	7.47278325914466	-3.26812165119157
Chr1	8960000	8970000	10001	*	1535.82918145062	162.480963177961	681.742233875554	289.244538296022	1.14823215034164	0.0031	0	0.5385	0	Core	0	7.35297883817237	1.10314990768514	-3.27788376218134
Chr1	8970000	8980000	10001	*	503.949993309029	105.41422386128	353.503727946323	340.949898750269	117.830489713631	0.0031	0	0.5712	0	Core	0	6.73354719139033	6.89276124236961	-3.27788376218134
Chr1	8980000	8990000	10001	*	921.265452081433	140.656720694546	286.816104638778	314.512657555209	66.2420595304239	0.0029	0	0.5752	0	Core	0	7.14625523965653	6.07129200787348	-3.28068511265548
Chr1	8990000	9000000	10001	*	226.255369213954	273.220719894045	612.716530629964	330.427801327413	119.908243128535	0.0033	2	0.5249	0	Core	0	8.09919377387156	6.91776879594372	-3.27508784068439
Chr1	9000000	9010000	10001	*	0.386761314895648	139.560287459733	547.389879226655	272.914544804637	4.29220113341996	0.0031	0	0.5619	0	Core	0	7.13504523669116	2.40386789318751	-3.27788376218134
Chr1	9010000	9020000	10001	*	481.904598359977	117.944889401996	375.209484983106	354.262803374885	83.1374754568795	0.0029	0	0.5666	0	Core	0	6.89414947589012	6.39467662561017	-3.28068511265548
Chr1	9020000	9030000	10001	*	207.690826098963	203.571103930228	807.719376806079	295.373000056646	2.73388607224201	0.0031	0	0.5264	0	Core	0	7.67645856574411	1.90067790894629	-3.27788376218134
Chr1	9030000	9040000	10001	*	334.16177606984	89.9075252546427	350.781784137852	318.510300303678	33.517443245687	0.0027	0	0.5668	0	Core	0	6.50632781942984	5.10925370096347	-3.28349191323125
Chr1	9040000	9050000	10001	*	107.906406855886	150.211353169342	314.419406593916	273.87624188092	11.0995774533026	0.0029	0	0.5816	0	Core	0	7.24042265305201	3.59688476084432	-3.28068511265548
Chr1	9050000	9060000	10001	*	401.845006176578	199.550848735914	551.403001508376	323.884489847609	7.73689758444489	0.0033	0	0.5438	0	Core	0	7.64782426145945	3.12712107902646	-3.27508784068439
Chr1	9060000	9070000	10001	*	404.939096695743	142.327476099974	238.239876672216	319.000577244527	306.003868066048	0.003	0	0.5689	0	Core	0	7.16317139276937	8.2621130225837	-3.27928375747887
Chr1	9070000	9080000	10001	*	1580.30673266362	134.286965711348	144.995852874331	372.799043100095	397.124290853874	0.0031	0	0.5856	0	Core	0	7.07987903862772	8.63707508739168	-3.27788376218134
Chr1	9080000	9090000	10001	*	0.773522629791296	79.8829928220693	127.093837826309	337.744241829327	296.599299977536	0.0035	0	0.5783	0	Core	0	6.33776447553178	8.21722732267186	-3.27229732716276
Chr1	9090000	9100000	10001	*	1.54704525958259	155.589097130566	223.792636458022	372.591618240505	91.3391336736055	0.0038	0	0.5556	0	Core	0	7.29083995500105	6.52887029196323	-3.26812165119157
Chr1	9100000	9110000	10001	*	293.938599320692	95.4941136415456	326.040012853158	275.516783952225	48.5538166430181	0.003	0	0.5481	0	Core	0	6.59236903230261	5.63092427318517	-3.27928375747887
Chr1	9110000	9120000	10001	*	631.581227224593	76.4370597983722	344.779549073018	332.671761172073	41.391035133744	0.0029	1	0.5486	0	Core	0	6.27495227096532	5.40568729044022	-3.28068511265548
Chr1	9120000	9130000	10001	*	472.235565487586	74.0353489030682	130.862683099577	309.553317730458	171.332640147407	0.0035	0	0.5853	0	Core	0	6.22949849946722	7.42905216654981	-3.27229732716276
Chr1	9130000	9140000	10001	*	0.386761314895648	229.676657140054	245.21921977086	313.494390062675	64.2736615584096	0.0033	1	0.5519	0	Core	0	7.84972821056135	6.02842906515291	-3.27508784068439
Chr1	9140000	9150000	10001	*	0.773522629791296	73.5132378388716	165.759398592797	299.804349329712	78.8452743234596	0.0026	0	0.5642	0	Core	0	6.21942484889069	6.31913511853063	-3.2848973639424
Chr1	9150000	9160000	10001	*	1012.9278837117	98.9922577716623	139.796242265841	277.779600602301	48.4444612001284	0.0023	0	0.5576	0	Core	0	6.64374448870631	5.62773701331042	-3.28912194980412
Chr1	9160000	9170000	10001	*	481.904598359977	193.128882646297	162.514004051927	304.216841797361	125.293998690851	0.0032	0	0.5704	0	Core	0	7.60087096908681	6.98064227573587	-3.2764851241262
Chr1	9170000	9180000	10001	*	1.54704525958259	169.320618118935	428.985323558158	320.377124039991	12.0017598571424	0.0031	0	0.5492	0	Core	0	7.41210928044262	3.70063500778225	-3.27788376218134
Chr1	9180000	9190000	10001	*	300.126780359023	242.572800425708	358.45906154636	237.275182565933	98.9393369544383	0.004	2	0.4765	0	Core	0	7.92820922744487	6.64298074146109	-3.26534456652099
Chr1	9190000	9200000	10001	*	244.43315101405	440.035204904837	521.21734260674	205.558035854028	31.9864670452315	0.0039	5	0.4623	0	Core	0	8.78475001089643	5.04380236387036	-3.26673244064524
Chr1	9200000	9210000	10001	*	2.32056788937389	95.4419025351259	129.082950609422	325.845597611009	784.187880961898	0.0032	0	0.5935	0	Core	0	6.59158820653827	9.6168940953716	-3.2764851241262
Chr1	9210000	9220000	10001	*	1.16028394468694	53.4641729737248	176.053929663297	318.397159471174	1475.61500749262	0.0029	1	0.5562	0	Core	0	5.7672356189117	10.5280780111154	-3.28068511265548
Chr1	9220000	9230000	10001	*	514.392548811212	156.789952578218	267.483324255534	297.748957539226	281.535587719482	0.0036	1	0.5487	0	Core	0	7.3018615331041	8.14228878825047	-3.2709040918629
Chr1	9230000	9240000	10001	*	1.93380657447824	90.7951140637768	453.622404696372	255.849135901977	462.71021772696	0.0035	0	0.5384	0	Core	0	6.52034546090607	8.85707970622537	-3.27229732716276
Chr1	9240000	9250000	10001	*	2.32056788937389	171.56569569498	926.193725905563	251.606354683084	33.9001872958009	0.0029	0	0.5167	0	Core	0	7.43100188969411	5.12516287372911	-3.28068511265548
Chr1	9250000	9260000	10001	*	945.631414919859	258.549398990122	1025.61446834575	245.006472787027	0.984198986007123	0.0031	1	0.5176	0	Core	0	8.01986533681876	0.988556714096987	-3.27788376218134
Chr1	9260000	9270000	10001	*	441.294660295934	191.14486060235	1311.87222553663	228.091918327706	4.78430062642352	0.0033	2	0.4925	0	Core	0	7.58605057818344	2.53214253516931	-3.27508784068439
Chr1	9270000	9275483	5484	*	0.386761314895648	207.956836869478	762.458336811373	139.200937590536	7.27213695216375	0.0033	2	0.498267	0	Core	0	7.70706115282044	3.04826007087672	-3.27508784068439
Chr2	0	10000	10001	*	538.758511649638	212.708047553667	810.301733752578	240.782548373551	87.3203211474098	0.0025	2	0.5174	0	Core	0	7.7394974260231	6.46467351289263	-3.28630418515664
Chr2	10000	20000	10001	*	5.41465840853907	118.101522721255	480.806946065591	263.542712512237	209.634384019517	0.0035	0	0.5416	0	Core	0	6.89604804805115	7.7185971513302	-3.27229732716276
Chr2	20000	30000	10001	*	575.88759787962	120.503233616559	194.758569167663	324.770759702222	812.866345859717	0.0034	0	0.571	0	Core	0	6.92485089916542	9.66864808254971	-3.27369190923451
Chr2	30000	40000	10001	*	0.773522629791296	102.438190795359	237.402355500378	303.236287915661	563.235208603299	0.0026	0	0.5546	0	Core	0	6.69262513653409	9.14015288351196	-3.2848973639424
Chr2	40000	50000	10001	*	1.16028394468694	141.231042865162	193.851254564839	325.110182199734	286.894004421076	0.0027	0	0.5624	0	Core	0	7.15209256682709	8.1693939339312	-3.28349191323125
Chr2	50000	60000	10001	*	0.386761314895648	98.7834133459837	285.559822881023	369.008825211217	124.692543754958	0.0032	0	0.5562	0	Core	0	6.64072811613886	6.97375525952677	-3.2764851241262
Chr2	60000	70000	10001	*	2.32056788937389	61.1914167238335	134.457044795378	319.905703904558	1523.2666417318	0.0038	0	0.5741	0	Core	0	5.95864357710117	10.5738995818868	-3.26812165119157
Chr2	70000	80000	10001	*	655.947190063019	93.8233582361167	198.387827578958	262.05302488427	1463.83195852126	0.0029	0	0.5505	0	Core	0	6.56717058291895	10.5165194568092	-3.28068511265548
Chr2	80000	90000	10001	*	2.70732920426954	128.700377324445	176.612277111188	270.859153014151	789.901702852884	0.0031	0	0.5522	0	Core	0	7.01903886646005	9.62735459039073	-3.27788376218134
Chr2	90000	100000	10001	*	1.16028394468694	124.262433278774	162.165036896995	307.101933026209	109.492137193292	0.0032	0	0.5587	0	Core	0	6.96880999909848	6.78779989843351	-3.2764851241262
Chr2	100000	110000	10001	*	2.70732920426954	92.9357694269826	394.612058797336	276.74247630435	18.5084087090784	0.0034	0	0.5532	0	Core	0	6.55360271547742	4.28602419773691	-3.27369190923451
Chr2	110000	120000	10001	*	864.798300106669	235.994201016832	888.819343612324	247.552141518364	0.382744050113881	0.0029	1	0.5187	0	Core	0	7.88870794819525	0.46753413421463	-3.28068511265548
Chr2	120000	130000	10001	*	895.739205298321	248.524866557549	617.357793790562	320.301696818321	5.3037389801495	0.0031	0	0.5269	0	Core	0	7.96303978518349	2.65620779814452	-3.27788376218134
Chr2	130000	140000	10001	*	1.54704525958259	218.346847046989	427.694145084909	363.615778861868	5.38575556231676	0.0029	0	0.5537	0	Core	0	7.77707015857835	2.67485732964105	-3.28068511265548
Chr2	140000	150000	10001	*	347.698422091187	238.030434167199	1065.64100101647	247.985848042961	110.531013900744	0.0026	0	0.5006	0	Core	0	7.90105050851114	6.8013011320208	-3.2848973639424
Chr2	150000	160000	10001	*	0.386761314895648	95.1808470030277	480.527772341645	299.408356415949	1664.52653508455	0.0029	0	0.5366	0	Core	0	6.58767772604678	10.7017626238019	-3.28068511265548
Chr2	160000	170000	10001	*	1.16028394468694	94.0322026617953	541.317850730835	324.921614145561	31.7130784380073	0.0037	0	0.5556	0	Core	0	6.570344563574	5.03179562435606	-3.26951220073622
Chr2	170000	180000	10001	*	2643.90034862665	96.486124663519	282.139944762687	278.439588791907	79.5014069807977	0.0028	1	0.5738	0	Core	0	6.60712498755832	6.3309420933504	-3.28208783035557
Chr2	180000	190000	10001	*	1.54704525958259	100.349746538573	158.64046863218	366.53858370155	5925.0145900665	0.0033	0	0.5881	0	Core	0	6.66319867060716	12.5328464629341	-3.27508784068439
Chr2	190000	200000	10001	*	512.458742236734	182.11233919175	912.165246277288	265.296395416046	60.1454935893242	0.003	0	0.5173	0	Core	0	7.51658520150496	5.93417427122133	-3.27928375747887
Chr2	200000	210000	10001	*	1.93380657447824	149.271553253788	660.525030855676	287.245716921788	65.3945548480289	0.0029	1	0.5535	0	Core	0	7.23142811942871	6.05299302296758	-3.28068511265548
Chr2	210000	220000	10001	*	618.044581203245	104.944323903503	484.15703075294	332.558620339569	0.273388607224201	0.0037	0	0.5932	0	Core	0	6.72716248540714	0.348672761862522	-3.26951220073622
Chr2	220000	230000	10001	*	0.386761314895648	114.551167484719	505.234646910845	312.400695348471	15.1730677009432	0.0029	1	0.555	0	Core	0	6.85238802609178	4.01552144946722	-3.28068511265548
Chr2	230000	240000	10001	*	236.311163401241	117.005089486443	270.03078448654	350.849721594353	158.346681304257	0.0027	3	0.5818	0	Core	0	6.88270527324751	7.31602516235301	-3.28349191323125
Chr2	240000	250000	10001	*	0	44.2750182438659	114.251846524804	305.499104565738	134.643889057919	0.003	1	0.5945	0	Core	0	5.50064331740636	7.08368024348058	-3.27928375747887
Chr2	250000	260000	10001	*	0.386761314895648	71.8424824334427	230.5974959792	288.075416360149	609.79328841358	0.003	0	0.5691	0	Core	0	6.18670818432719	9.25454039921525	-3.27928375747887
Chr2	260000	270000	10001	*	1.16028394468694	92.8835583205629	247.243229269467	313.928096587273	103.723637580862	0.0035	1	0.5618	0	Core	0	6.55280061798134	6.71044330512626	-3.27229732716276
Chr2	270000	280000	10001	*	623.459239611784	80.3528927798462	117.427447634687	298.880365864264	144.431201196545	0.0027	0	0.5919	0	Core	0	6.34612174164488	7.18419301186916	-3.28349191323125
Chr2	280000	290000	10001	*	0.773522629791296	78.8909818000959	105.0042169191	314.399516722705	202.225552763741	0.0029	0	0.62	0	Core	0	6.31996075390327	7.66693800196263	-3.28068511265548
Chr2	290000	300000	10001	*	17.4042591703042	43.0741627962138	112.786184474088	334.218019216292	321.368307792048	0.0026	0	0.6134	0	Core	0	5.4618612602077	8.33256610845866	-3.2848973639424
Chr2	300000	310000	10001	*	129.178279175146	123.844744427417	143.844261263055	304.08484415944	33.4354266635198	0.003	3	0.6005	0	Core	0	6.96399127937811	5.10582164737899	-3.27928375747887
Chr2	310000	320000	10001	*	2.32056788937389	109.382267949173	112.576804181129	295.391856862063	86.6641884900717	0.0029	0	0.5858	0	Core	0	6.78636462279251	6.45391570564014	-3.28068511265548
Chr2	320000	330000	10001	*	0.773522629791296	126.925199706177	118.683729392443	330.748367019508	100.497652015616	0.0029	0	0.5913	0	Core	0	6.99915667533988	6.66530254314963	-3.28068511265548
Chr2	330000	340000	10001	*	0.773522629791296	123.218211150381	105.597461082485	390.090733667763	63.8362397868509	0.0032	1	0.5967	0	Core	0	6.95673288676588	6.01872851828186	-3.2764851241262
Chr2	340000	350000	10001	*	1063.20685464814	225.969668584259	140.773350299651	371.893916440064	342.801974598426	0.0039	4	0.5787	0	Core	0	7.82635570356034	8.42543402061506	-3.26673244064524
Chr2	350000	360000	10001	*	101.33146450266	921.526028306878	670.43569805575	152.344130966397	0	0.0241	5	0.3777	0	Core	0	9.84944580596621	0	-3.01042497941909
Chr2	360000	370000	10001	*	137.687028102851	386.77987635679	447.794653209004	211.780781641738	51.6977856260964	0.0108	6	0.4754	0	Core	0	8.59909412722263	5.71967043562331	-3.17397021350026
Chr2	370000	380000	10001	*	544.559931373072	81.0838482697213	94.5700989866273	396.181481817552	144.786606385937	0.0028	1	0.5991	0	Core	0	6.35902646410595	7.18771437316953	-3.28208783035557
Chr2	380000	390000	10001	*	0.386761314895648	90.4818474252589	130.618406091124	293.336465071577	96.314806325086	0.0028	1	0.5597	0	Core	0	6.51541359535872	6.60458742082558	-3.28208783035557
Chr2	390000	400000	10001	*	1.54704525958259	130.684399368392	96.105554468329	383.585135798793	105.06324175626	0.0029	0	0.5953	0	Core	0	7.04094062962123	6.72878093910624	-3.28068511265548
Chr2	400000	410000	10001	*	459.859203410925	84.1120924420612	99.7697095951171	270.783725792482	278.473635318571	0.0031	1	0.5957	0	Core	0	6.41129221465784	8.12656837985856	-3.27788376218134
Chr2	410000	420000	10001	*	695.396844182375	80.7183705247838	115.054470981148	320.773116953754	113.456271998043	0.0027	0	0.5737	0	Core	0	6.35258853171362	6.83865271193041	-3.28349191323125
Chr2	420000	430000	10001	*	6.57494235322601	151.934319681191	119.311870271321	268.709477196578	2969.05495217627	0.0033	0	0.5665	0	Core	0	7.25676838507976	11.5362739087854	-3.27508784068439
Chr2	430000	440000	10001	*	0.773522629791296	98.3657244946265	117.916001651592	317.171467119049	59.5166997927086	0.0027	0	0.5983	0	Core	0	6.6346763850129	5.91926140890411	-3.28349191323125
Chr2	440000	450000	10001	*	2.32056788937389	76.3848486919525	117.46234435018	305.348250122399	219.94113451187	0.0033	0	0.577	0	Core	0	6.27397922124774	7.78751823242263	-3.27508784068439
Chr2	450000	460000	10001	*	0.386761314895648	84.2687257613202	142.622876220792	292.921615352396	917.410149262251	0.0032	0	0.5552	0	Core	0	6.41394479232445	9.8429947749606	-3.2764851241262
Chr2	460000	470000	10001	*	1.16028394468694	107.711512543744	107.656367296585	271.255145927914	205.041455418151	0.0033	0	0.5591	0	Core	0	6.764360919563	7.68679082577138	-3.27508784068439
Chr2	470000	480000	10001	*	0.386761314895648	111.3140788867	143.320810530656	266.088381243573	271.966986466635	0.0032	0	0.5371	0	Core	0	6.81139497474313	8.09258266714358	-3.2764851241262
Chr2	480000	490000	10001	*	0.386761314895648	55.4481950176716	136.132087139053	297.258680598376	232.434993862016	0.0031	0	0.563	0	Core	0	5.81885554513831	7.86687703911007	-3.27788376218134
Chr2	490000	500000	10001	*	0.773522629791296	173.236451100409	168.062581815349	229.166756236492	1226.61266403282	0.0033	2	0.5146	0	Core	0	7.44490266400197	10.2616397184751	-3.27508784068439
Chr2	500000	510000	10001	*	477.650223896125	366.574178172385	378.524672954962	229.770174009846	0.0546777214448402	0.004	5	0.4995	0	Core	0	8.52189161164891	0.0768022210143885	-3.26534456652099
Chr2	510000	520000	10001	*	313.276665065475	350.597579607971	375.314175129585	244.403055013674	0.0273388607224201	0.003	2	0.5227	0	Core	0	8.45778132880099	0.0389121232814827	-3.27928375747887
Chr2	520000	530000	10001	*	450.963693168325	1908.68141738326	535.943756544879	45.7654667477962	0	0.0106	3	0.2452	0	Core	0	10.8991162653854	0	-3.17657670931474
Chr2	530000	540000	10001	*	594.838902309506	2745.3643977582	390.52914308463	32.5657029556836	0	0.0109	5	0.2213	0	Core	0	11.4233073449469	0	-3.17266872938774
Chr2	540000	550000	10001	*	2349.57498799106	2999.52806380907	371.650020002797	18.1968172276981	0	0.0062	3	0.2111	0	Core	0	11.5510007080489	0	-3.2351443287453
Chr2	550000	560000	10001	*	455.991590261969	2510.20557444408	348.234323906846	25.9469642542099	0	0.0079	3	0.2107	0	Core	0	11.2941644212329	0	-3.21223323006143
Chr2	560000	570000	10001	*	89.7286250557903	2761.81089628039	398.311110639618	38.0907469429536	0	0.0111	3	0.2559	0	Core	0	11.4319211032964	0	-3.17006927816036
Chr2	570000	580000	10001	*	158.958900422111	2896.15007309816	390.354659507163	22.8733049711894	0	0.0112	4	0.2214	0	Core	0	11.5004187031699	0	-3.16877130682594
Chr2	580000	590000	10001	*	532.570330611307	2771.73100650013	395.763650408613	18.6116669468788	0	0.0057	5	0.2074	0	Core	0	11.437091946329	0	-3.24195271816677
Chr2	590000	600000	10001	*	133.819414953894	2619.6922646061	379.04812368736	20.5916315156957	0	0.0053	4	0.2075	0	Core	0	11.355732239476	0	-3.24742265852373
Chr2	600000	610000	10001	*	1303.77239251323	2988.56373146095	322.026890571438	32.6788437881874	0	0.0083	5	0.2329	0	Core	0	11.5457192512326	0	-3.20689485194112
Chr2	610000	620000	10001	*	913.53022578352	3020.41250637693	431.323403496204	29.0017667318132	0	0.0119	4	0.226	0	Core	0	11.5610074499518	0	-3.15971805857306
Chr2	620000	630000	10001	*	2534.83365782608	2436.27464775385	353.573521377309	12.7094868512627	0	0.0076	4	0.1877	0	Core	0	11.2510531170227	0	-3.21625001699283
Chr2	630000	640000	10001	*	2313.99294702066	2595.62294454664	422.529431191913	16.0282846047082	0	0.0097	4	0.197	0	Core	0	11.3424208202317	0	-3.18836456914626
Chr2	640000	650000	10001	*	1504.11475362917	2829.78975683878	395.135509529735	19.1019438877287	0	0.0111	4	0.2107	0	Core	0	11.466988888717	0	-3.17006927816036
Chr2	650000	660000	10001	*	1218.68490323619	2325.53489103777	382.572691952175	18.687094168548	0	0.0095	4	0.2156	0	Core	0	11.1839671080133	0	-3.19099722506091
Chr2	660000	670000	10001	*	1188.51752067433	1662.87152835953	495.812533727676	50.781376988799	0	0.0054	7	0.2707	0	Core	0	10.7003283283851	0	-3.24605322791223
Chr2	670000	680000	10001	*	37.5158475448779	495.326766603249	283.500916666923	175.1231519105	332.303852081016	0.0033	5	0.4442	0	Core	0	8.95514645018143	8.38069418092845	-3.27508784068439
Chr2	680000	690000	10001	*	0.386761314895648	172.192228972016	162.269727043475	248.966401924661	585.270330345569	0.003	0	0.5278	0	Core	0	7.43623038845916	9.19542223721967	-3.27928375747887
Chr2	690000	700000	10001	*	1.54704525958259	141.857576142198	156.162801832161	246.439589998743	1606.10338972074	0.003	1	0.5258	0	Core	0	7.15843373828525	10.6502470295054	-3.27928375747887
Chr2	700000	710000	10001	*	205.370258209589	168.53745152264	152.638233567346	274.837938957202	545.136882805057	0.0032	0	0.5316	0	Core	0	7.40546019563014	9.09311878083547	-3.2764851241262
Chr2	710000	720000	10001	*	0.773522629791296	145.721198017252	159.582679950497	235.710067716297	350.238144714924	0.0031	0	0.518	0	Core	0	7.19693351385367	8.45630572087446	-3.27788376218134
Chr2	720000	730000	10001	*	847.394040936365	144.729186995278	109.959550519137	264.560980004772	207.365258579556	0.0029	0	0.54	0	Core	0	7.1871460425809	7.70297094218387	-3.28068511265548
Chr2	730000	740000	10001	*	1248.85228579805	46.3112513942323	139.656655403868	314.22980547395	113.6476440231	0.0032	0	0.5568	0	Core	0	5.56411141588018	6.84106289801996	-3.2764851241262
Chr2	740000	750000	10001	*	1.93380657447824	80.6139483119445	117.3576542037	292.33705438446	191.645413664165	0.0028	0	0.5572	0	Core	0	6.35074383336831	7.58980402974194	-3.28208783035557
Chr2	750000	760000	10001	*	0.386761314895648	124.158011065935	149.288148879997	289.583960793534	86.554833047182	0.0042	0	0.5575	0	Core	0	6.96760682722689	6.45211491284663	-3.26257281727094
Chr2	760000	770000	10001	*	840.819098583139	115.543178506692	107.342296857146	297.598103095888	139.810933734456	0.0034	0	0.5804	0	Core	0	6.86472075303535	7.13761555096619	-3.27369190923451
Chr2	770000	780000	10001	*	15.0836912809303	151.882108574771	143.390603961643	256.942830616181	202.690313396023	0.0029	0	0.5489	0	Core	0	7.25627577122332	7.67023356356009	-3.28068511265548
Chr2	780000	790000	10001	*	382.1201791169	101.341757560547	137.911819629207	367.217428696573	150.992527769926	0.003	0	0.596	0	Core	0	6.67725110449203	7.2478565896656	-3.27928375747887
Chr2	790000	800000	10001	*	0.773522629791296	48.3996956510185	149.392839026477	294.637584645371	178.741471403183	0.0033	0	0.5626	0	Core	0	5.62643024835483	7.48977950727523	-3.27508784068439
Chr2	800000	810000	10001	*	1.54704525958259	136.323198861714	406.721219073484	251.549784266832	44.9450870276586	0.0032	0	0.541	0	Core	0	7.10143155929133	5.52183869525303	-3.2764851241262
Chr2	810000	820000	10001	*	1017.56901949045	111.41850109954	400.195533276252	283.889205557508	57.2202354920253	0.0029	0	0.5573	0	Core	0	6.81273567415994	5.86344876984254	-3.28068511265548
Chr2	820000	830000	10001	*	807.944386817009	74.2964044351664	114.077362947338	307.497925939972	88.3045201334169	0.0031	1	0.5929	0	Core	0	6.23450906964638	6.48066129385119	-3.27788376218134
Chr2	830000	840000	10001	*	0.773522629791296	70.5372047729514	210.845955010038	273.084256053393	72.7213695216375	0.0027	0	0.5794	0	Core	0	6.16062184281254	6.20401096704593	-3.28349191323125
Chr2	840000	850000	10001	*	1.16028394468694	84.6864146126774	163.177041646299	408.438405338799	42.429911841196	0.0029	0	0.5713	0	Core	0	6.42099458131883	5.44061711914133	-3.28068511265548
Chr2	850000	860000	10001	*	1.93380657447824	118.623633785452	156.930529573012	306.347660809517	238.039460310112	0.0029	0	0.558	0	Core	0	6.90235863764415	7.90110498578223	-3.28068511265548
Chr2	860000	870000	10001	*	1.54704525958259	130.475554942713	444.549258668135	249.965812611778	122.150029707773	0.0031	0	0.5378	0	Core	0	7.03865077605072	6.94427316563638	-3.27788376218134
Chr2	870000	880000	10001	*	0.386761314895648	73.304393413193	297.215325855758	286.020024569663	20.5041455418151	0.0028	0	0.572	0	Core	0	6.21537561073922	4.4265429024277	-3.28208783035557
Chr2	880000	890000	10001	*	0.386761314895648	152.247586319709	576.109876077576	243.818494045737	149.160824101524	0.0035	0	0.5365	0	Core	0	7.25972054113281	7.23036466277005	-3.27229732716276
Chr2	890000	900000	10001	*	436.653524517186	74.5574599672647	202.680123584624	307.629923577893	25.8625622434094	0.0038	0	0.577	0	Core	0	6.23950229801352	4.74752501542191	-3.26812165119157
Chr2	900000	910000	10001	*	1.16028394468694	67.4045383877722	143.809364547561	291.186789254004	40.7622413371284	0.0034	1	0.6074	0	Core	0	6.09602014064658	5.38412723685233	-3.27369190923451
Chr2	910000	920000	10001	*	710.867296778201	62.7577499164231	107.307400141653	339.101931819373	405.271271349155	0.0032	0	0.5686	0	Core	0	5.99452881076377	8.66629954069007	-3.2764851241262
Chr2	920000	930000	10001	*	0.386761314895648	75.3406265635595	103.294277859932	306.196806366178	87.4296765902995	0.0031	0	0.6045	0	Core	0	6.25437912236866	6.46645870754385	-3.27788376218134
Chr2	930000	940000	10001	*	1.16028394468694	73.5654489452913	124.476584164317	322.564513468398	2298.54205409819	0.0028	0	0.5865	0	Core	0	6.22043538512515	11.167130866674	-3.28208783035557
Chr2	940000	950000	10001	*	0	112.619356547192	141.296801032049	234.258093699164	130.078299317275	0.003	0	0.5521	0	Core	0	6.82806482757297	7.03428504956197	-3.27928375747887
Chr2	950000	960000	10001	*	222.387756064998	63.1232276613606	200.202456784605	291.620495778602	128.711356281154	0.0029	0	0.5543	0	Core	0	6.00277514068305	7.01916098342205	-3.28068511265548
Chr2	960000	970000	10001	*	222.000994750102	73.8265044773895	118.125381944551	329.692385916139	112.718122758538	0.0027	0	0.6029	0	Core	0	6.22547747603137	6.82931837830923	-3.28349191323125
Chr2	970000	980000	10001	*	1.16028394468694	40.1503408367133	137.562852474275	300.294626270562	1286.84017420431	0.0032	2	0.5818	0	Core	0	5.36283247502149	10.3307378453583	-3.2764851241262
Chr2	980000	990000	10001	*	1.16028394468694	70.7982603050497	133.375246615088	274.404232432604	153.234314349165	0.0032	0	0.5683	0	Core	0	6.16587698239412	7.26897996432704	-3.2764851241262
Chr2	990000	1000000	10001	*	1.93380657447824	59.6772946376635	150.50953392226	309.647601757545	28.569109454929	0.004	1	0.5887	0	Core	0	5.92308485779869	4.88601888875802	-3.26534456652099
Chr2	1000000	1010000	10001	*	1.16028394468694	120.137755871622	353.957385247735	329.070111337368	56.1540199238509	0.0029	2	0.5749	0	Core	0	6.92050477998708	5.83678306874698	-3.28068511265548
Chr2	1010000	1020000	10001	*	444.001989500204	110.687545609665	320.561228520723	348.586904944277	29.607986162381	0.0023	0	0.5724	0	Core	0	6.80332450819268	4.9358362214536	-3.28912194980412
Chr2	1020000	1030000	10001	*	352.726319184831	85.7828478474901	185.336455984494	418.677650680395	38.9305376687262	0.0043	0	0.5847	0	Core	0	6.43933802499267	5.31942059302368	-3.26118893702968
Chr2	1030000	1040000	10001	*	12.7631233915564	124.262433278774	499.930346155876	280.362982944472	35.9779407107048	0.0029	2	0.535	0	Core	0	6.96880999909848	5.20859297865659	-3.28068511265548
Chr2	1040000	1050000	10001	*	0.386761314895648	123.270422256801	678.67132291215	282.493801956627	164.743974713304	0.0031	1	0.515	0	Core	0	6.95733914955051	7.37281261480799	-3.27788376218134
Chr2	1050000	1060000	10001	*	0.773522629791296	100.663013177091	373.429752492952	322.187377360052	461.425291273006	0.003	0	0.5516	0	Core	0	6.66765108616186	8.85307649461229	-3.27928375747887
Chr2	1060000	1070000	10001	*	1.54704525958259	96.9038135148762	560.755321260559	308.648191070428	11.3182883390819	0.0029	1	0.5509	0	Core	0	6.61329315116013	3.6227298983004	-3.28068511265548
Chr2	1070000	1080000	10001	*	39.4496541193561	174.071828803124	472.536424493698	303.990560132354	49.6200322111925	0.0031	1	0.557	0	Core	0	7.45180314495803	5.66163652037059	-3.27788376218134
Chr2	1080000	1090000	10001	*	1.16028394468694	81.5537482274982	484.680481485338	300.879187238499	101.509189862346	0.0033	1	0.5369	0	Core	0	6.36726181488914	6.67960944169592	-3.27508784068439
Chr2	1090000	1100000	10001	*	0.386761314895648	106.771712628191	148.136557268721	363.747776499789	153.343669792054	0.0032	0	0.588	0	Core	0	6.75183474628473	7.27000250365171	-3.2764851241262
Chr2	1100000	1110000	10001	*	0	76.8025375433098	310.092213872757	285.360036380058	205.588232632599	0.0027	0	0.5777	0	Core	0	6.28174530461616	7.69061426969848	-3.28349191323125
Chr2	1110000	1120000	10001	*	245.206673643841	59.8339279569225	193.013733393002	288.094273165567	148.614046887076	0.0028	0	0.567	0	Core	0	5.9268042547938	7.22510182237301	-3.28208783035557
Chr2	1120000	1130000	10001	*	1.54704525958259	114.185689739781	186.627634457743	295.882133802913	95.0572187318547	0.0027	0	0.5773	0	Core	0	6.84781768238959	6.58582213186317	-3.28349191323125
Chr2	1130000	1140000	10001	*	1.16028394468694	57.7454837001364	143.25101709967	383.717133436714	49.8934208184167	0.0023	2	0.6228	0	Core	0	5.8764060377332	5.66940726069454	-3.28912194980412
Chr2	1140000	1150000	10001	*	2.70732920426954	98.3657244946265	505.688304212257	267.238646374029	628.438391426271	0.0025	1	0.55	0	Core	0	6.6346763850129	9.29792136560067	-3.28630418515664
Chr2	1150000	1160000	10001	*	1.16028394468694	107.398245905227	307.335373348792	254.661157160687	45.8746082922209	0.0026	0	0.5406	0	Core	0	6.76019760103933	5.55073472954897	-3.2848973639424
Chr2	1160000	1170000	10001	*	859.38364169813	93.9799915553756	153.33616787721	259.714781012524	290.147328847044	0.004	0	0.5456	0	Core	0	6.56955172281431	8.18560557249456	-3.26534456652099
Chr2	1170000	1180000	10001	*	0	108.651312459298	130.757992953097	377.758382924846	89.7808186124276	0.003	0	0.5616	0	Core	0	6.77677927006885	6.50431559266708	-3.27928375747887
Chr2	1180000	1190000	10001	*	1.16028394468694	100.349746538573	127.198527972788	368.254552994525	123.380278440282	0.0028	0	0.5774	0	Core	0	6.66319867060716	6.95861394170663	-3.28208783035557
Chr2	1190000	1200000	10001	*	467.981191023734	102.229346369681	290.270879472607	272.443124669204	86.8828993758511	0.0028	0	0.5427	0	Core	0	6.68970935281753	6.45751056189663	-3.28208783035557
Chr2	1200000	1210000	10001	*	11.9896007617651	89.3854141904462	253.2454643343	333.690028664607	151.047205491371	0.0027	0	0.5563	0	Core	0	6.49801807357981	7.24837549078145	-3.28349191323125
Chr2	1210000	1220000	10001	*	816.839897059608	162.53317428438	368.369728746435	251.662925099336	31.7130784380073	0.0029	0	0.532	0	Core	0	7.35343951981467	5.03179562435606	-3.28068511265548
Chr2	1220000	1230000	10001	*	0.386761314895648	61.6613166816104	163.874975956163	308.440766210837	825.770288120699	0.0037	0	0.5589	0	Core	0	5.96950317979058	9.69134273292712	-3.26951220073622
Chr2	1230000	1240000	10001	*	447.096080019369	86.3571700181063	98.4087376908815	336.952256001801	106.75825112105	0.0026	0	0.6098	0	Core	0	6.44885421503048	6.75165453143867	-3.2848973639424
Chr2	1240000	1250000	10001	*	0.386761314895648	116.535189528666	203.308264463502	269.74660149453	25.0970741431816	0.0032	1	0.5484	0	Core	0	6.87694894790896	4.70581616391481	-3.2764851241262
Chr2	1250000	1260000	10001	*	1.16028394468694	187.594505365814	405.011280014316	320.678832926667	3.28066328669041	0.0029	0	0.5645	0	Core	0	7.55914383399045	2.09783435884089	-3.28068511265548
Chr2	1260000	1270000	10001	*	242.112583124676	202.318037376156	295.016832779685	302.236877228544	64.9844719371926	0.0033	0	0.5489	0	Core	0	7.66759439944239	6.04405465125313	-3.27508784068439
Chr2	1270000	1280000	10001	*	3.86761314895648	85.051892357615	225.956232818602	282.833224454139	62.277924725673	0.0029	0	0.5625	0	Core	0	6.42713501364823	5.98363038058499	-3.28068511265548
Chr2	1280000	1290000	10001	*	990.88248876265	88.3411920620531	751.396078000022	270.915723430403	31.0569457806692	0.0037	0	0.5291	0	Core	0	6.48125359925474	5.00256507443532	-3.26951220073622
Chr2	1290000	1300000	10001	*	181.391056686059	172.140017865596	571.71288992543	300.294626270562	11.1542551747474	0.0034	0	0.5626	0	Core	0	7.43579540323575	3.60338958112751	-3.27369190923451
Chr2	1300000	1310000	10001	*	174.042591703042	172.870973355472	432.963549124386	317.360035173222	55.9353090380715	0.0035	0	0.5545	0	Core	0	7.44187329383133	5.83125172765318	-3.27229732716276
Chr2	1310000	1320000	10001	*	0.773522629791296	187.333449833715	316.966866824921	369.68767020624	7.40883125577585	0.0029	0	0.5506	0	Core	0	7.55714544901222	3.07190529409881	-3.28068511265548
Chr2	1320000	1330000	10001	*	414.221368253239	205.659548187014	527.847718550452	299.74777891346	9.86932872079366	0.0031	2	0.526	0	Core	0	7.69111221113938	3.44219093855647	-3.27788376218134
Chr2	1330000	1340000	10001	*	852.421938030008	327.624692783323	514.06351593063	250.550373579715	54.1309442303918	0.0043	1	0.4699	0	Core	0	8.36029707790695	5.78479040563687	-3.26118893702968
Chr2	1340000	1350000	10001	*	3.09409051916518	172.296651184855	583.333496184672	274.705941319281	53.1194063836622	0.0031	1	0.5256	0	Core	0	7.43709996564798	5.75807410988468	-3.27788376218134
Chr2	1350000	1360000	10001	*	1.16028394468694	149.845875424404	401.382021603021	347.530923840908	30.0180690732173	0.0031	0	0.5415	0	Core	0	7.23693143921851	4.95503697387257	-3.27788376218134
Chr2	1360000	1370000	10001	*	813.745806540443	149.167131040949	451.458808335792	329.484961056548	166.821728128207	0.0032	1	0.5429	0	Core	0	7.23042525646489	7.39078570551342	-3.2764851241262
Chr2	1370000	1380000	10001	*	0.773522629791296	154.388241682914	652.98734030914	298.918079475099	17.8522760517403	0.0033	0	0.528	0	Core	0	7.27973352809205	4.23666680672781	-3.27508784068439
Chr2	1380000	1390000	10001	*	535.664421130472	112.201667695835	568.013838083148	257.602818805786	21.0509227562635	0.0035	1	0.5185	0	Core	0	6.82275140199742	4.46276712382347	-3.27229732716276
Chr2	1390000	1400000	10001	*	660.975087156662	147.078686784163	188.826127533816	306.969935388288	1248.40173602859	0.0029	1	0.5744	0	Core	0	7.21022019580643	10.2870217242868	-3.28068511265548
Chr2	1400000	1410000	10001	*	973.864990907242	77.220226394667	159.094125933592	323.959917069278	122.423418314997	0.0035	1	0.5806	0	Core	0	6.28946980659093	6.94747234667281	-3.27229732716276
Chr2	1410000	1420000	10001	*	2.32056788937389	108.024779182262	574.64421402686	299.992917383885	2.51517518646265	0.0028	0	0.5435	0	Core	0	6.76851225817656	1.81359659096007	-3.28208783035557
Chr2	1420000	1430000	10001	*	1.54704525958259	234.688923356341	615.333784291955	293.939882844931	0.601454935893242	0.0037	1	0.5425	0	Core	0	7.88074014779267	0.679383201997667	-3.26951220073622
Chr2	1430000	1440000	10001	*	1.93380657447824	215.21418066181	1010.57398396817	248.721263454236	30.7288794520002	0.0034	1	0.513	0	Core	0	7.75631733680456	4.98772466632922	-3.27369190923451
Chr2	1440000	1450000	10001	*	1.93380657447824	98.5223578138855	337.346548672962	336.914542390966	503.445120203366	0.0039	0	0.5924	0	Core	0	6.63694876007961	8.97855351338366	-3.26673244064524
Chr2	1450000	1460000	10001	*	0.386761314895648	131.415354858267	370.777602115467	343.966987617038	19.000508202082	0.003	0	0.5595	0	Core	0	7.04892661625092	4.32196475345279	-3.27928375747887
Chr2	1460000	1470000	10001	*	1.16028394468694	125.254444300748	514.098412646123	273.10311285881	7.24479809144133	0.003	0	0.5396	0	Core	0	6.98019036304745	3.04348416363933	-3.27928375747887
Chr2	1470000	1480000	10001	*	1.93380657447824	133.451588008633	458.542841580916	295.787849775826	57.3295909349149	0.0033	0	0.5553	0	Core	0	7.07094298476722	5.86615605146251	-3.27508784068439
Chr2	1480000	1490000	10001	*	79.6728308685035	227.797057308947	334.868881872943	329.484961056548	28.5144317334842	0.0041	5	0.5568	0	Core	0	7.83792468667647	4.8833486595027	-3.26395802625003
Chr2	1490000	1500000	10001	*	157.411855162529	140.604509588126	292.085508678255	304.556264294873	1.61299278262279	0.0027	1	0.5529	0	Core	0	7.14572340051222	1.38570313977898	-3.28349191323125
Chr2	1500000	1510000	10001	*	405.712619325535	109.330056842754	501.430904922084	278.307591153986	222.593004001944	0.0028	0	0.5359	0	Core	0	6.78568206276069	7.80473123819912	-3.28208783035557
Chr2	1510000	1520000	10001	*	445.162273444891	121.86072238347	139.412378395416	303.142003888575	226.256411338749	0.0027	0	0.5748	0	Core	0	6.94087996081972	7.82817718595931	-3.28349191323125
Chr2	1520000	1530000	10001	*	142.714925196494	102.908090753136	366.79937654924	267.8609209528	74.580412050762	0.0028	0	0.5576	0	Core	0	6.6991641831408	6.23994047881959	-3.28208783035557
Chr2	1530000	1540000	10001	*	1.54704525958259	75.6538932020774	433.905760442703	299.54035405387	54.7050603055626	0.0028	0	0.5561	0	Core	0	6.26028716218816	5.79973648432231	-3.28208783035557
Chr2	1540000	1550000	10001	*	1.54704525958259	141.596520610099	648.97421802742	290.262805788556	6.69802087699292	0.0027	0	0.538	0	Core	0	7.15579496987493	2.94448758373557	-3.28349191323125
Chr2	1550000	1560000	10001	*	0.773522629791296	149.375975466628	507.712313710864	266.050667632739	132.921540832407	0.0027	0	0.5293	0	Core	0	7.23243028575497	7.06524422177863	-3.28349191323125
Chr2	1560000	1570000	10001	*	1556.71429245498	95.5463247479652	277.987235618994	284.473766525444	116.764274145456	0.0032	1	0.5568	0	Core	0	6.59314943569141	6.87975812851524	-3.2764851241262
Chr2	1570000	1580000	10001	*	0.386761314895648	28.1939974666127	122.627058243177	307.705350799562	133.30428488252	0.003	1	0.5829	0	Core	0	4.86759986415168	7.06936152343174	-3.27928375747887
Chr2	1580000	1590000	10001	*	94.3697608345381	82.8590258879895	84.6245350710595	360.919255687194	208.212763261951	0.0032	0	0.6232	0	Core	0	6.38989416672765	7.70882705729191	-3.2764851241262
Chr2	1590000	1600000	10001	*	372.837907559405	98.2613022817872	111.878869871265	323.639351377184	158.319342443535	0.0025	0	0.5943	0	Core	0	6.63315947742036	7.31577762018694	-3.28630418515664
Chr2	1600000	1610000	10001	*	11.9896007617651	56.596839358904	124.092720293892	443.625204247488	11.5643380855837	0.0029	0	0.5723	0	Core	0	5.84791774047259	3.65126276405265	-3.28068511265548
Chr2	1610000	1620000	10001	*	1.93380657447824	82.4413370366323	139.13320467147	401.461387334397	3.00727467946621	0.0027	0	0.5547	0	Core	0	6.38269037020267	2.00262140298606	-3.28349191323125
Chr2	1620000	1630000	10001	*	0.773522629791296	141.805365035778	203.796818480407	340.327624171498	32.341872234623	0.0032	0	0.5493	0	Core	0	7.15790637057812	5.05926321264206	-3.2764851241262
Chr2	1630000	1640000	10001	*	1.16028394468694	95.9118024929028	134.03828420946	286.849724008025	135.382038297424	0.0029	0	0.5562	0	Core	0	6.59860047116848	7.09150984172066	-3.28068511265548
Chr2	1640000	1650000	10001	*	6.57494235322601	42.447629519178	125.663072491087	340.8744715286	544.125344958327	0.0037	0	0.5903	0	Core	0	5.44120556135815	9.09044418802728	-3.26951220073622
Chr2	1650000	1660000	10001	*	0.386761314895648	42.0821517742404	115.089367696641	288.320554830574	35.595196660591	0.0035	0	0.5807	0	Core	0	5.42901840318405	5.1935823934319	-3.27229732716276
Chr2	1660000	1670000	10001	*	471.462042857795	100.140902112895	107.412090288132	311.684136742614	118.595977813858	0.0034	0	0.579	0	Core	0	6.66022274133748	6.90202506020057	-3.27369190923451
Chr2	1670000	1680000	10001	*	1.16028394468694	66.4647384722184	117.3576542037	317.492032811143	890.782098918614	0.0029	0	0.5798	0	Core	0	6.076061746334	9.80054742995071	-3.28068511265548
Chr2	1680000	1690000	10001	*	900.767102391964	123.792533320998	149.602219319436	347.285785370483	502.843665267473	0.0036	0	0.5391	0	Core	0	6.96338780616218	8.97683234744637	-3.2709040918629
Chr2	1690000	1700000	10001	*	464.113577874777	101.185124241288	108.912649054341	302.878008612733	138.772057027004	0.0028	0	0.5759	0	Core	0	6.67504137875701	7.12693215837098	-3.28208783035557
Chr2	1700000	1710000	10001	*	0.773522629791296	83.1722925265074	112.123146879717	296.938114906282	52.4906125870466	0.0031	1	0.5772	0	Core	0	6.39527350617163	5.74121382074816	-3.27788376218134
Chr2	1710000	1720000	10001	*	1.54704525958259	62.0267944265479	114.496123533256	326.053022470599	28.2137042655375	0.0032	0	0.6042	0	Core	0	5.97789338331317	4.86857339679606	-3.2764851241262
Chr2	1720000	1730000	10001	*	218.133381601145	60.6170945532173	137.144091888356	295.297572834977	56.5641028346872	0.0034	0	0.5577	0	Core	0	5.94525875109635	5.84709751754776	-3.27369190923451
Chr2	1730000	1740000	10001	*	0.386761314895648	80.979426056882	138.92382437851	289.791385653124	275.493699499827	0.0028	0	0.5713	0	Core	0	6.35718998449669	8.11110279571783	-3.28208783035557
Chr2	1740000	1750000	10001	*	0.773522629791296	76.6981153304705	114.077362947338	322.583370273815	39.9694143761782	0.0026	0	0.5929	0	Core	0	6.2798076994874	5.3564753657231	-3.2848973639424
Chr2	1750000	1760000	10001	*	572.793507360455	37.487574409311	131.386133831975	274.57394368136	1510.77278238166	0.0029	0	0.5641	0	Core	0	5.26632084637058	10.562025605197	-3.28068511265548
Chr2	1760000	1770000	10001	*	0.386761314895648	27.9329419345144	98.7228081303205	298.672941004674	75.8379996439934	0.0029	0	0.6386	0	Core	0	4.85464112048961	6.26374805609206	-3.28068511265548
Chr2	1770000	1780000	10001	*	899.993579762173	131.833043709624	134.771115234817	319.038290855362	442.014700160088	0.0039	0	0.5649	0	Core	0	7.05347026767977	8.79121076100693	-3.26673244064524
Chr2	1780000	1790000	10001	*	0.773522629791296	118.310367146934	144.088538271507	283.323501394989	470.009693539846	0.0027	0	0.5464	0	Core	0	6.89857559728099	8.87961294107341	-3.28349191323125
Chr2	1790000	1800000	10001	*	0.773522629791296	118.049311614836	118.997799831882	353.81024004487	84.9691791252817	0.0025	0	0.5858	0	Core	0	6.89541546823485	6.42574762571638	-3.28630418515664
Chr2	1800000	1810000	10001	*	4.25437446385213	88.5500364877317	262.039436638592	292.733047298223	126.387553119748	0.0029	0	0.5799	0	Core	0	6.48462211493399	6.99308051030719	-3.28068511265548
Chr2	1810000	1820000	10001	*	0.773522629791296	109.90437901337	131.072063392536	268.502052336988	478.07465745296	0.0029	0	0.5632	0	Core	0	6.79317252061382	8.90410668820859	-3.28068511265548
Chr2	1820000	1830000	10001	*	0.773522629791296	63.6975498319768	111.006451983934	310.571585222993	119.826226546367	0.0031	0	0.5913	0	Core	0	6.01563917167717	6.91678982988181	-3.27788376218134
Chr2	1830000	1840000	10001	*	434.719717942708	62.4966943843248	105.702151228965	292.978185768648	128.191917927428	0.0033	0	0.5973	0	Core	0	5.98860958252846	7.01337200956873	-3.27508784068439
Chr2	1840000	1850000	10001	*	297.806212469649	71.4247935820855	131.106960108029	316.304054069853	121.931318821994	0.0039	0	0.5809	0	Core	0	6.17841176256356	6.94170870315054	-3.26673244064524
Chr2	1850000	1860000	10001	*	566.605326322124	78.577715161578	163.63069894771	325.374177475576	111.569890608196	0.0031	0	0.5727	0	Core	0	6.3142925717981	6.81467718700588	-3.27788376218134
Chr2	1860000	1870000	10001	*	1.54704525958259	87.1403366144011	118.090485229058	319.47199737996	278.036213547012	0.003	0	0.5916	0	Core	0	6.46173050127126	8.12430855811713	-3.27928375747887
Chr2	1870000	1880000	10001	*	0.386761314895648	126.50751085482	144.402608710946	267.163219152359	452.43080609533	0.0037	0	0.5485	0	Core	0	6.99443842159494	8.82473860090453	-3.26951220073622
Chr2	1880000	1890000	10001	*	1.16028394468694	107.189401479548	126.116729792499	309.213895232947	274.400145070931	0.003	0	0.591	0	Core	0	6.75741536563245	8.10538550920787	-3.27928375747887
Chr2	1890000	1900000	10001	*	1.54704525958259	36.8610411322751	107.412090288132	321.979952500461	180.40914190725	0.0031	1	0.5961	0	Core	0	5.24264217882169	7.50310335044781	-3.27788376218134
Chr2	1900000	1910000	10001	*	3.09409051916518	36.2867189616589	109.715273510685	359.976415416328	183.279722283104	0.0029	0	0.628	0	Core	0	5.22058994788519	7.52575351863212	-3.28068511265548
Chr2	1910000	1920000	10001	*	0.773522629791296	114.39453416546	131.944481279866	257.30110991911	75.0725115437656	0.0029	0	0.5597	0	Core	0	6.8504310799701	6.24930333148544	-3.28068511265548
Chr2	1920000	1930000	10001	*	0.386761314895648	97.4259245790727	121.440569916407	344.212126087462	243.999331947599	0.0029	0	0.5917	0	Core	0	6.62096645451326	7.93663400513645	-3.28068511265548
Chr2	1930000	1940000	10001	*	46.0245964725821	106.040757138316	124.406790733331	294.920436726631	472.606885308476	0.0035	0	0.5561	0	Core	0	6.74201641561104	8.88754624482982	-3.27229732716276
Chr2	1940000	1950000	10001	*	1.16028394468694	55.3437728048323	160.245717544868	250.965223298895	190.852586703215	0.0033	0	0.5414	0	Core	0	5.81618426535535	7.58385440636381	-3.27508784068439
Chr2	1950000	1960000	10001	*	0.386761314895648	137.158576564429	116.48523631637	332.20034103664	119.990259710702	0.0031	0	0.5879	0	Core	0	7.11018131387161	6.91874709816146	-3.27788376218134
Chr2	1960000	1970000	10001	*	378.252565967944	145.146875846636	142.762463082765	220.454912133698	26.7100669258044	0.0028	0	0.5539	0	Core	0	7.19127517903679	4.79233829013143	-3.28208783035557
Chr2	1970000	1980000	10001	*	1.16028394468694	99.9320576872161	140.843143730638	243.347073910305	291.240883275941	0.0033	0	0.5582	0	Core	0	6.65724066075809	8.1910142090304	-3.27508784068439
Chr2	1980000	1990000	10001	*	0.773522629791296	97.8958245368496	123.534372846	303.292858331913	48.3077668965163	0.0032	0	0.5708	0	Core	0	6.62783770538493	5.62374301087232	-3.2764851241262
Chr2	1990000	2000000	10001	*	0.773522629791296	160.966841091791	114.042466231844	330.276946884075	71.3544264855164	0.0034	0	0.5781	0	Core	0	7.33955467517491	6.17700937527057	-3.27369190923451
Chr2	2000000	2010000	10001	*	842.752905157617	83.8510369099629	127.373011550254	339.422497511467	3851.79942604249	0.0028	0	0.5667	0	Core	0	6.40686038501147	11.9116913669518	-3.28208783035557
Chr2	2010000	2020000	10001	*	1.16028394468694	98.1568800689479	130.513715944644	261.657031970507	105.774052135043	0.0029	0	0.5498	0	Core	0	6.63164097321126	6.73841728057948	-3.28068511265548
Chr2	2020000	2030000	10001	*	139.234073362433	48.2952734381792	104.585456333182	317.171467119049	198.398112262603	0.0036	0	0.5981	0	Core	0	5.6233774186873	7.63950794132491	-3.2709040918629
Chr2	2030000	2040000	10001	*	434.719717942708	111.470712205959	163.386421939258	230.411305394034	45.5738808242743	0.0029	0	0.5419	0	Core	0	6.81340555693962	5.54144919634265	-3.28068511265548
Chr2	2040000	2050000	10001	*	0	69.4929826445583	116.310752738904	342.024736659055	131.554597796285	0.0032	0	0.578	0	Core	0	6.13940774377779	7.05044290224967	-3.2764851241262
Chr2	2050000	2060000	10001	*	2.32056788937389	59.6250835312439	107.795954158558	288.037702749315	103.696298720139	0.0033	0	0.5856	0	Core	0	5.92184292486877	6.71006663001396	-3.27508784068439
Chr2	2060000	2070000	10001	*	0.773522629791296	53.6208062929838	115.50812828256	261.732459192176	64.4376947227442	0.0031	0	0.5743	0	Core	0	5.77137870570062	6.03205001996033	-3.27788376218134
Chr2	2070000	2080000	10001	*	1.16028394468694	42.604262838437	133.619523623541	313.286965203084	295.806473016585	0.0032	0	0.5757	0	Core	0	5.44639727748696	8.21337874563875	-3.2764851241262
Chr2	2080000	2090000	10001	*	407.259664585117	77.6379152460242	102.07289281767	294.467873396615	252.47437877155	0.0031	0	0.5936	0	Core	0	6.29715317007438	7.98569611654059	-3.27788376218134
Chr2	2090000	2100000	10001	*	1.93380657447824	67.4567494941919	147.717796682802	289.96109690188	144.403862335823	0.0032	0	0.5696	0	Core	0	6.09712088592131	7.18392178158196	-3.2764851241262
Chr2	2100000	2110000	10001	*	0.773522629791296	65.9426274080219	110.727278259988	349.982308545157	560.774711138281	0.0035	0	0.58	0	Core	0	6.06485327086155	9.13384787131172	-3.27229732716276
Chr2	2110000	2120000	10001	*	1.16028394468694	72.5212268168982	92.615882919007	317.718314476151	156.815705103802	0.0027	0	0.596	0	Core	0	6.20008893534304	7.30209697274295	-3.28349191323125
Chr2	2120000	2130000	10001	*	0.773522629791296	108.703523565718	127.547495127721	362.088377623066	94.7291524031856	0.003	0	0.5899	0	Core	0	6.77746605415894	6.58088643049615	-3.27928375747887
Chr2	2130000	2140000	10001	*	0	93.1968249590808	374.441757242255	277.251610050617	6.34261568760146	0.0032	0	0.5325	0	Core	0	6.55760652741134	2.87629409131132	-3.2764851241262
Chr2	2140000	2150000	10001	*	0.773522629791296	84.895259038356	372.906301760553	248.023561653796	1005.00385901689	0.0036	2	0.5375	0	Core	0	6.42450659935228	9.97442012397436	-3.2709040918629
Chr2	2150000	2160000	10001	*	731.36564646767	78.577715161578	125.453692198127	304.311125824448	29.2799198337119	0.0033	0	0.5883	0	Core	0	6.3142925717981	4.9202894806714	-3.27508784068439
Chr2	2160000	2170000	10001	*	298.966496414336	77.9511818845421	90.556976704907	366.312302036543	223.057764634226	0.003	0	0.5947	0	Core	0	6.30288895801157	7.807726913164	-3.27928375747887
Chr2	2170000	2180000	10001	*	7.34846498301731	140.239031843188	160.629581415294	278.515016013576	179.698331528467	0.0027	0	0.5566	0	Core	0	7.14199502671967	7.49743937496606	-3.28349191323125
Chr2	2180000	2190000	10001	*	0.773522629791296	55.9703060818682	147.26413938139	305.593388592824	489.693673259989	0.0023	0	0.5736	0	Core	0	5.83213825222121	8.93867885996774	-3.28912194980412
Chr2	2190000	2200000	10001	*	2.32056788937389	196.104915712217	519.402713401092	235.766638132549	401.279797683682	0.0024	1	0.5328	0	Core	0	7.6228199468015	8.65205547804053	-3.28771237954945
Chr2	2200000	2210000	10001	*	416.928697457509	61.4524722559317	179.33422091966	275.76192242265	22.6365766781638	0.0031	2	0.5858	0	Core	0	5.96468677866255	4.56294919778577	-3.27788376218134
Chr2	2210000	2220000	10001	*	0.773522629791296	202.787937333933	305.939504729063	295.599281721653	266.881958372265	0.0037	0	0.5612	0	Core	0	7.67092484744352	8.0654536099123	-3.26951220073622
Chr2	2220000	2230000	10001	*	165.533842775337	55.0827172727341	332.216731495458	244.931045565358	138.690040444837	0.0029	0	0.5407	0	Core	0	5.80948434617826	7.12608535359258	-3.28068511265548
Chr2	2230000	2240000	10001	*	97.8506126685989	73.9831377966485	137.597749189768	281.739529739935	54.5957048626729	0.0027	0	0.5626	0	Core	0	6.22849429379884	5.7969015243707	-3.28349191323125
Chr2	2240000	2250000	10001	*	0.773522629791296	99.4099466230196	223.513462734077	248.853261092158	35.5678577998685	0.0032	0	0.5797	0	Core	0	6.64975837971009	5.19250420879583	-3.2764851241262
Chr2	2250000	2260000	10001	*	1.93380657447824	84.0076702292219	122.696851674163	307.686493994145	934.22354860654	0.0034	0	0.5796	0	Core	0	6.40952111616609	9.86916744666541	-3.27369190923451
Chr2	2260000	2270000	10001	*	270.346159112058	71.8424824334427	99.4556391556781	316.530335734861	114.959909337777	0.0039	0	0.6011	0	Core	0	6.18670818432719	6.85748230032883	-3.26673244064524
Chr2	2270000	2280000	10001	*	1.93380657447824	59.8861390633421	148.939181725065	247.061864577514	158.237325861368	0.0034	0	0.5682	0	Core	0	5.92804192596462	7.31503473874229	-3.27369190923451
Chr2	2280000	2290000	10001	*	0.773522629791296	88.4978253813121	141.820251764448	320.094271958731	61.5397754861676	0.0031	0	0.5631	0	Core	0	6.48378072307753	5.9667021349758	-3.27788376218134
Chr2	2290000	2300000	10001	*	679.152868956758	140.343454056028	167.469337651965	289.074827047266	720.515674339382	0.0031	1	0.5508	0	Core	0	7.14306125992941	9.49488692620439	-3.27788376218134
Chr2	2300000	2310000	10001	*	474.169372062064	73.9309266902288	148.2412474152	245.704174587468	2359.6444078128	0.0027	0	0.5521	0	Core	0	6.22748938865383	11.2049650243559	-3.28349191323125
Chr2	2310000	2320000	10001	*	1.93380657447824	69.2319271124601	129.501711195341	332.238054647475	49.264627021801	0.0027	0	0.5751	0	Core	0	6.13405511709312	5.65147157697246	-3.28349191323125
Chr2	2320000	2330000	10001	*	0.773522629791296	101.916079731163	101.933305955697	269.690031078278	63.3714791545698	0.0032	0	0.6011	0	Core	0	6.68532459801302	6.00834971496141	-3.2764851241262
Chr2	2330000	2340000	10001	*	1.16028394468694	73.9309266902288	110.587691398015	303.500283191504	84.0669967214418	0.0028	2	0.5985	0	Core	0	6.22748938865383	6.41052761573625	-3.28208783035557
Chr2	2340000	2350000	10001	*	1.54704525958259	107.659301437325	149.916289758875	272.707119945047	128.574661977542	0.0029	1	0.6095	0	Core	0	6.76366786694586	7.01763981993214	-3.28068511265548
Chr2	2350000	2360000	10001	*	0.386761314895648	77.376859713926	125.5932790601	323.865633042192	1316.74888783464	0.0025	0	0.5997	0	Core	0	6.29235586525151	10.3638597591115	-3.28630418515664
Chr2	2360000	2370000	10001	*	1.16028394468694	134.913498988384	182.37023516757	259.922205872115	14.2162075756585	0.0027	0	0.5412	0	Core	0	7.08654494210105	3.92753692721388	-3.28349191323125
Chr2	2370000	2380000	10001	*	52.2127775109125	97.3215023662335	98.0946672514426	297.051255738786	383.864943403501	0.0031	2	0.5998	0	Core	0	6.61943505534728	8.58820845463279	-3.27788376218134
Chr2	2380000	2390000	10001	*	352.726319184831	182.16455029817	118.055588513565	347.002933289223	137.569147155218	0.0031	0	0.5616	0	Core	0	7.51699650075415	7.11446226253788	-3.27788376218134
Chr2	2390000	2400000	10001	*	1.54704525958259	137.941743160724	129.990265212246	254.604586744435	37.5362557718828	0.0032	0	0.5503	0	Core	0	7.11833629235913	5.26814449937648	-3.2764851241262
Chr2	2400000	2410000	10001	*	961.488628830581	94.0322026617953	165.270844575892	276.553908250177	126.305536537581	0.003	0	0.5507	0	Core	0	6.570344563574	6.99215135341006	-3.27928375747887
Chr2	2410000	2420000	10001	*	1.54704525958259	89.0721475519283	112.26273374169	429.48260018451	6.75269859843776	0.0038	0	0.566	0	Core	0	6.4930091543027	2.95469857837565	-3.26812165119157
Chr2	2420000	2430000	10001	*	0.773522629791296	80.7183705247838	133.724213770021	305.197395679061	75.2092058473777	0.0041	0	0.5708	0	Core	0	6.35258853171362	6.25189337644008	-3.26395802625003
Chr2	2430000	2440000	10001	*	0.773522629791296	58.5808614028508	127.966255713639	358.053021263763	121.165830721766	0.0028	0	0.57	0	Core	0	5.89677707669296	6.93269701550797	-3.28208783035557
Chr2	2440000	2450000	10001	*	484.225166249351	65.2638830245664	138.330580215126	340.742473890679	167.915282557104	0.0025	1	0.5758	0	Core	0	6.05015084186417	7.40015605119952	-3.28630418515664
Chr2	2450000	2460000	10001	*	1.93380657447824	66.6213717914774	119.940011150199	288.923972603928	81.7978712814809	0.0035	0	0.577	0	Core	0	6.07940737844618	6.3715217716563	-3.27229732716276
Chr2	2460000	2470000	10001	*	48.345164361956	68.7098160482635	113.553912214939	336.575119893454	37.7002889362173	0.0033	0	0.5773	0	Core	0	6.12328991550097	5.27427243245322	-3.27508784068439
Chr2	2470000	2480000	10001	*	598.706515458463	74.4008266480057	110.09913738111	303.198574304827	99.4040975867195	0.003	0	0.5985	0	Core	0	6.2365084352837	6.64967433802167	-3.27928375747887
Chr2	2480000	2490000	10001	*	0.773522629791296	91.9437584050092	123.429682699521	360.070699443415	512.330249938153	0.0034	0	0.5797	0	Core	0	6.53828607976867	9.00374346912287	-3.27369190923451
Chr2	2490000	2500000	10001	*	1337.80738822405	102.542613008199	114.251846524804	350.906292010605	126.63360286625	0.0037	0	0.5913	0	Core	0	6.69408082149264	6.99586439588613	-3.26951220073622
Chr2	2500000	2510000	10001	*	934.802098102781	94.8675803645097	150.823604361699	369.442531735815	20.9415673133738	0.0033	0	0.5515	0	Core	0	6.58297111498097	4.45559467780583	-3.27508784068439
Chr2	2510000	2520000	10001	*	1.93380657447824	102.124924156842	138.679547370058	287.321144143457	404.53312210965	0.0039	0	0.5664	0	Core	0	6.68824924810444	8.66367594182972	-3.26673244064524
Chr2	2520000	2530000	10001	*	0.386761314895648	80.1440483541676	106.783949409254	338.9133637652	495.35281742953	0.0034	0	0.5799	0	Core	0	6.34241337666231	8.95522217128721	-3.27369190923451
Chr2	2530000	2540000	10001	*	0.773522629791296	52.2111064196531	104.794836626141	290.602228286068	43.6328217129825	0.0029	0	0.6132	0	Core	0	5.73365549670839	5.48003311238106	-3.28068511265548
Chr2	2540000	2550000	10001	*	0.386761314895648	126.925199706177	423.157572070791	286.133165402167	166.384306356649	0.0036	1	0.5332	0	Core	0	6.99915667533988	7.38702045958174	-3.2709040918629
Chr2	2550000	2560000	10001	*	776.616720310461	59.8861390633421	597.710942967879	289.904526485628	85.6799895040646	0.0029	3	0.5085	0	Core	0	5.92804192596462	6.43762707362542	-3.28068511265548
Chr2	2560000	2570000	10001	*	109.840213430364	161.01905219821	457.670423693586	301.294036957679	1469.29973066575	0.0029	1	0.5391	0	Core	0	7.34001966273469	10.521894572966	-3.28068511265548
Chr2	2570000	2580000	10001	*	393.336257248874	142.275264993555	163.909872671656	284.285198471271	2081.77222743012	0.0031	0	0.5626	0	Core	0	7.16264575435532	11.0242893591225	-3.27788376218134
Chr2	2580000	2590000	10001	*	306.314961397353	61.2436278302531	126.395903516444	289.489676766447	103.204199227136	0.0031	0	0.5713	0	Core	0	5.95985424422475	6.70326960637479	-3.27788376218134
Chr2	2590000	2600000	10001	*	326.813311086823	106.354023776833	115.612818429039	301.614602649773	118.869366421083	0.003	0	0.5855	0	Core	0	6.74623245618418	6.90531920333011	-3.27928375747887
Chr2	2600000	2610000	10001	*	696.170366812166	128.700377324445	116.938893617782	385.621670783861	5.5771275873737	0.003	0	0.5762	0	Core	0	7.01903886646005	2.71745765687504	-3.27928375747887
Chr2	2610000	2620000	10001	*	1003.64561215421	70.0150937087549	149.881393043382	427.785487696953	45.3551699384949	0.0031	0	0.5711	0	Core	0	6.15005378576504	5.53465834482093	-3.27788376218134
Chr2	2620000	2630000	10001	*	4.64113577874777	79.4653039707121	140.494176575705	318.962863633693	79.0366463485165	0.0039	0	0.5605	0	Core	0	6.33029493302542	6.32258881238428	-3.26673244064524
Chr2	2630000	2640000	10001	*	20.885111004365	84.1643035484809	125.942246215032	300.068344605554	123.899716794008	0.0029	0	0.5796	0	Core	0	6.41217694922406	6.96462639546084	-3.28068511265548
Chr2	2640000	2650000	10001	*	575.500836564724	91.4738584472323	136.027396992573	359.82556097299	38.4110993150002	0.0032	0	0.5698	0	Core	0	6.53097368085375	5.30053008679345	-3.2764851241262
Chr2	2650000	2660000	10001	*	1.16028394468694	93.927780448956	278.650273213365	352.546834081911	38.8211822258365	0.0032	0	0.569	0	Core	0	6.56875844610516	5.31546414784013	-3.2764851241262
Chr2	2660000	2670000	10001	*	1.54704525958259	329.765348146529	238.100289810243	250.550373579715	138.963429052061	0.0029	2	0.5269	0	Core	0	8.36966429164873	7.12890610539112	-3.28068511265548
Chr2	2670000	2680000	10001	*	299.353257729231	573.382370700631	649.532565475311	148.9687627967	0.410082910836301	0.0052	3	0.3875	0	Core	0	9.16586765952572	0.495779993500454	-3.24879339025715
Chr2	2680000	2690000	10001	*	859.770403013025	240.84983391386	514.656760094015	228.733049711894	75.8926773654382	0.0035	2	0.5102	0	Core	0	7.91796773681327	6.26477430904868	-3.27229732716276
Chr2	2690000	2700000	10001	*	802.529728408469	163.942874157711	409.547853028435	278.684727262332	25.8899011041318	0.0038	1	0.5484	0	Core	0	7.36582264188553	4.7489925441539	-3.26812165119157
Chr2	2700000	2710000	10001	*	1332.7794911304	124.471277704453	128.454809730544	330.767223824925	73.213469014641	0.003	0	0.5768	0	Core	0	6.97121333677287	6.21360914045571	-3.27928375747887
Chr2	2710000	2720000	10001	*	1663.07365405129	128.543744005186	176.716967257668	303.500283191504	28.7604814799859	0.0032	0	0.5883	0	Core	0	7.01729553558511	4.8953259621656	-3.2764851241262
Chr2	2720000	2730000	10001	*	1.16028394468694	51.0624620784208	138.190993353153	355.997629473277	673.356139593207	0.0031	0	0.5973	0	Core	0	5.70217163452676	9.39736689561416	-3.27788376218134
Chr2	2730000	2740000	10001	*	1746.22733675385	137.732898735045	417.469407445396	273.348251329235	10.5801390995766	0.003	0	0.5396	0	Core	0	7.11616613470987	3.53358067784008	-3.27928375747887
Chr2	2740000	2750000	10001	*	351.566035240144	108.546890246459	194.898156029636	304.57512110029	131.745969821342	0.0038	0	0.5598	0	Core	0	6.77540472029464	7.05252425112789	-3.26812165119157
Chr2	2750000	2760000	10001	*	4.25437446385213	139.716920778992	197.480512976134	257.583962000369	109.437459471848	0.0027	0	0.5543	0	Core	0	7.13665200844281	6.78708579511392	-3.28349191323125
Chr2	2760000	2770000	10001	*	0.773522629791296	82.336914823793	159.024332502605	319.924560709975	53.9395722053349	0.0033	0	0.5572	0	Core	0	6.38088378659087	5.7797737715981	-3.27508784068439
Chr2	2770000	2780000	10001	*	2.70732920426954	115.543178506692	139.272791533443	347.813775922168	29.1432255300998	0.0029	0	0.5701	0	Core	0	6.86472075303535	4.91376189826287	-3.28068511265548
Chr2	2780000	2790000	10001	*	1.93380657447824	83.9032480163826	144.088538271507	301.388320984766	149.57090701236	0.0033	0	0.5735	0	Core	0	6.40774784074455	7.23429923227042	-3.27508784068439
Chr2	2790000	2800000	10001	*	174.042591703042	82.9112369944092	191.757451635246	343.118431373259	704.549779677488	0.0028	0	0.5636	0	Core	0	6.39079211735905	9.46260406474509	-3.28208783035557
Chr2	2800000	2810000	10001	*	0.386761314895648	155.484674917727	740.996856783042	245.987026668727	88.960652790755	0.0028	0	0.5229	0	Core	0	7.28987756576465	6.49122222481776	-3.28208783035557
Chr2	2810000	2820000	10001	*	0.773522629791296	234.010178972885	1287.02576410546	195.846781064117	0.355405189391461	0.0031	0	0.4874	0	Core	0	7.87657943522743	0.438724200170365	-3.27788376218134
Chr2	2820000	2830000	10001	*	206.917303469172	188.899783026305	450.342113440009	295.373000056646	142.544819806698	0.0027	0	0.5502	0	Core	0	7.56909444688376	7.16535745780477	-3.28349191323125
Chr2	2830000	2840000	10001	*	0	101.602813092645	184.184864373217	307.44135552372	333.151356763411	0.0027	0	0.561	0	Core	0	6.68092647607225	8.38435792178574	-3.28349191323125
Chr2	2840000	2850000	10001	*	127.631233915564	70.589415879371	162.025450035022	378.720080001128	35.595196660591	0.0035	0	0.5743	0	Core	0	6.16167440322805	5.1935823934319	-3.27229732716276
Chr2	2850000	2860000	10001	*	1.16028394468694	93.4578804911791	199.609212621221	307.23393066413	343.430768395041	0.0023	0	0.5728	0	Core	0	6.56159925858703	8.42807021586664	-3.28912194980412
Chr2	2860000	2870000	10001	*	5.02789709364342	184.044150129277	150.090773336341	305.499104565738	258.270217244703	0.0025	0	0.571	0	Core	0	7.53172571766964	8.01831268095959	-3.28630418515664
Chr2	2870000	2880000	10001	*	0.773522629791296	509.423765336556	893.321019910949	131.563931396528	104.461786820367	0.0046	6	0.3698	0	Core	0	8.9955516923395	6.72057653513862	-3.25704524330251
Chr2	2880000	2890000	10001	*	739.100872765583	321.150515587286	1222.08297657258	220.737764214958	6.6706820162705	0.0033	0	0.4926	1	LS	1	8.33159109350389	2.9393548564437	-3.27508784068439
Chr2	2890000	2900000	10001	*	1.16028394468694	203.936581675165	828.936579825958	247.627568740033	11.126916314025	0.0032	2	0.527	1	LS	1	7.67903372166282	3.60014083709776	-3.2764851241262
Chr2	2900000	2910000	10001	*	609.149070960646	265.702320569615	803.776047955346	270.576300932891	0.847504682395023	0.0026	1	0.5393	1	LS	1	8.05908656756836	0.885578020804183	-3.2848973639424
Chr2	2910000	2920000	10001	*	561.964190543377	289.249529564878	1044.9123520135	279.797278781953	45.9566248743882	0.0034	1	0.5188	1	LS	1	8.18114991855388	5.55325680972429	-3.27369190923451
Chr2	2920000	2930000	10001	*	204.596735579798	210.6718144033	715.033700456086	325.336463864741	122.532773757887	0.003	0	0.5438	1	LS	1	7.72568536687762	6.94875003535223	-3.27928375747887
Chr2	2930000	2940000	10001	*	761.533029029531	222.73257998624	1043.65607025574	308.742475097514	2.37848088285055	0.0032	0	0.5307	1	LS	1	7.8056315470306	1.75637469164641	-3.2764851241262
Chr2	2940000	2950000	10001	*	138.847312047538	361.666334168937	1036.11837970921	219.436644641164	13.3960417539858	0.0032	5	0.4964	1	LS	1	8.50249901784616	3.84760028663198	-3.2764851241262
Chr2	2950000	2960000	10001	*	215.812813711772	226.282935222777	975.851752052415	253.416608003145	53.2287618265519	0.0035	1	0.5154	1	LS	1	7.8283455580762	5.76098632540855	-3.27229732716276
Chr2	2960000	2970000	10001	*	0	230.094345991411	449.888456138597	337.44253294265	14.5989516257723	0.0031	0	0.5677	1	LS	1	7.85233815269608	3.96337716659517	-3.27788376218134
Chr2	2970000	2980000	10001	*	511.298458292047	232.182790248198	622.243333959613	266.955794292769	18.6451030126905	0.0037	1	0.5206	1	LS	1	7.86531750601565	4.2960978277391	-3.26951220073622
Chr2	2980000	2990000	10001	*	317.531039529327	192.450138262841	221.733730243922	281.173825577416	1439.30900045325	0.0032	3	0.5293	1	LS	1	7.5958179496804	10.4921626418841	-3.2764851241262
Chr2	2990000	3000000	10001	*	1.16028394468694	274.839264193054	725.572508535039	233.183255790378	144.813945246659	0.0035	0	0.5041	1	LS	1	8.10768402090063	7.18798489144313	-3.27229732716276
Chr2	3000000	3010000	10001	*	348.085183406083	821.750603938921	959.10132861567	90.7389476680656	1.03887670745196	0.0057	7	0.3256	1	LS	1	9.684311370133	1.02777453703886	-3.24195271816677
Chr2	3010000	3020000	10001	*	61.495049068408	1303.13700512812	841.987951420422	61.2469039954025	0.0546777214448402	0.0111	8	0.2612	1	LS	1	10.3488797234306	0.0768022210143885	-3.17006927816036
Chr2	3020000	3030000	10001	*	1557.87457639967	556.727027752761	647.752832985157	157.944602175336	0.10935544288968	0.0034	11	0.3976	1	LS	1	9.12341537622764	0.149721686089674	-3.27369190923451
Chr2	3030000	3040000	10001	*	582.849301547741	475.486546163781	478.782936566984	265.20211138896	502.542937799526	0.0048	6	0.4515	0	Core	0	8.89629166926815	8.97597099384442	-3.254289378012
Chr2	3040000	3050000	10001	*	506.270561198403	135.801087797518	184.254657804204	306.781367334115	672.153229721421	0.0031	0	0.5688	0	Core	0	7.09593589188337	9.39479113234725	-3.27788376218134
Chr2	3050000	3060000	10001	*	1.16028394468694	95.5463247479652	153.929412040595	282.889794870391	1348.65333829771	0.0038	0	0.5606	0	Core	0	6.59314943569141	10.3983731798325	-3.26812165119157
Chr2	3060000	3070000	10001	*	52.5995388258081	97.8958245368496	144.856266012358	304.009416937771	154.573918524563	0.0041	0	0.5762	0	Core	0	6.62783770538493	7.2814564071093	-3.26395802625003
Chr2	3070000	3080000	10001	*	0.773522629791296	179.553994977187	175.739859223858	292.374767995295	220.84331691571	0.003	0	0.5566	0	Core	0	7.49628653180048	7.79339728204582	-3.27928375747887
Chr2	3080000	3090000	10001	*	0.773522629791296	160.392518921174	126.67507724039	295.636995332488	442.206072185145	0.0033	0	0.5771	0	Core	0	7.33442989623762	8.79183383707199	-3.27508784068439
Chr2	3090000	3100000	10001	*	504.723515938821	161.854429900925	134.03828420946	355.017075591578	214.281990342329	0.0034	0	0.5819	0	Core	0	7.34743915365452	7.75008382404729	-3.27369190923451
Chr2	3100000	3110000	10001	*	107.132884226094	88.7588809134103	187.883916215499	344.249839698297	450.325713819704	0.003	0	0.5766	0	Core	0	6.48798278386061	8.81802516673718	-3.27928375747887
Chr2	3110000	3120000	10001	*	521.741013794229	132.40736588024	213.393415241043	340.572762641923	118.04920059941	0.0034	2	0.5641	0	Core	0	7.05969451465944	6.89541412289755	-3.27369190923451
Chr2	3120000	3130000	10001	*	286.203373022779	308.463216727311	1156.30266786786	204.124918642313	2.78856379368685	0.0037	3	0.4693	0	Core	0	8.27362412845889	1.92165104089909	-3.26951220073622
Chr2	3130000	3140000	10001	*	5.41465840853907	244.609033576075	1268.39091803208	223.773709887144	10.4981225174093	0.0033	0	0.495	0	Core	0	7.94021981422764	3.52332640336554	-3.27508784068439
Chr2	3140000	3150000	10001	*	0.773522629791296	277.136552875519	1102.21275885337	253.699460084405	12.2204707429218	0.0031	1	0.5202	0	Core	0	8.1196495467818	3.72470164286667	-3.27788376218134
Chr2	3150000	3160000	10001	*	1301.83858593875	276.614441811322	764.028689008568	322.262804581721	2.92525809729895	0.0031	0	0.5456	0	Core	0	8.11693881024001	1.97278751857783	-3.27788376218134
Chr2	3160000	3170000	10001	*	932.481530213407	247.376222216317	712.241963216629	320.490264872494	7.27213695216375	0.0036	0	0.564	0	Core	0	7.95638325651924	3.04826007087672	-3.2709040918629
Chr2	3170000	3180000	10001	*	1.16028394468694	182.895505788045	778.58061936924	244.08248932158	115.889430602339	0.0029	4	0.5232	0	Core	0	7.52274241201219	6.86900067390462	-3.28068511265548
Chr2	3180000	3190000	10001	*	2.70732920426954	267.164231549365	759.003561977544	269.840885521617	34.1188981815803	0.0026	1	0.5422	0	Core	0	8.06697300938971	5.13417567743416	-3.2848973639424
Chr2	3190000	3200000	10001	*	0.773522629791296	196.835871202092	661.32765531202	313.588674089761	1755.61961901165	0.003	0	0.5281	2	LS	1	7.6281602261517	10.7785861065278	-3.27928375747887
Chr2	3200000	3210000	10001	*	1.54704525958259	215.31860287465	935.441355511266	258.4890886604	92.6240601275593	0.0027	2	0.5337	2	LS	1	7.75701392868052	6.5488074256164	-3.28349191323125
Chr2	3210000	3220000	10001	*	398.750915657413	229.676657140054	806.881855634242	237.803173117618	15.6104894725019	0.003	2	0.5152	2	LS	1	7.84972821056135	4.05402268168233	-3.27928375747887
Chr2	3220000	3230000	10001	*	753.024280101827	207.591359124541	497.627162933323	299.842062940547	180.791885957364	0.0039	1	0.5579	2	LS	1	7.70453558537749	7.5061439979409	-3.26673244064524
Chr2	3230000	3240000	10001	*	1205.14825721484	296.193606718692	1057.68454988402	285.680602072152	58.6418562495911	0.003	1	0.5202	2	LS	1	8.21525927047477	5.89825325459465	-3.27928375747887
Chr2	3240000	3250000	10001	*	189.126282983972	255.051254860006	748.98820463099	300.841473627664	107.496400360556	0.0033	0	0.5422	2	LS	1	8.00028881926134	6.76150336822215	-3.27508784068439
Chr2	3250000	3260000	10001	*	490.413347287682	202.318037376156	774.253426648081	302.746010974812	36.4153624822636	0.0027	1	0.5391	2	LS	1	7.66759439944239	5.22555884698669	-3.28349191323125
Chr2	3260000	3270000	10001	*	1.16028394468694	317.130260392973	712.276859932122	256.150844788654	20.8595507312065	0.009	1	0.5151	2	LS	1	8.31347379661763	4.45019184518716	-3.19759995988516
Chr2	3270000	3280000	10001	*	634.288556428863	311.491460899651	1366.03192798211	205.576892659445	47.9797005678473	0.0035	0	0.4874	2	LS	1	8.28767295719411	5.61411204905462	-3.27229732716276
Chr2	3280000	3290000	10001	*	1.16028394468694	176.995650762624	578.622439593088	244.516195846178	786.046923491023	0.0028	0	0.5212	2	LS	1	7.47569817984363	9.62030584109801	-3.28208783035557
Chr2	3290000	3300000	10001	*	2.32056788937389	187.542294259394	824.818767397757	215.96699244438	363.63418646891	0.0028	0	0.504	2	LS	1	7.55874437838248	8.51030601812118	-3.28208783035557
Chr2	3300000	3310000	10001	*	20.1115883745737	156.58110815254	248.883374897648	286.378303872592	807.535268018845	0.003	2	0.537	2	LS	1	7.2999507752775	9.65916689468723	-3.27928375747887
Chr2	3310000	3320000	10001	*	214.652529767085	200.803915289986	717.0228132392	243.875064461989	846.520483409016	0.0027	1	0.5263	2	LS	1	7.65681035487633	9.72710442640777	-3.28349191323125
Chr2	3320000	3330000	10001	*	1.54704525958259	215.109758448971	829.913687859768	269.74660149453	3.55405189391461	0.0032	0	0.5353	2	LS	1	7.75562040842321	2.18715073123446	-3.2764851241262
Chr2	3330000	3340000	10001	*	749.930189582661	216.7805138544	504.780989609433	248.1367024863	700.339595126236	0.0036	0	0.5171	2	LS	1	7.76673106291454	9.45396936948926	-3.2709040918629
Chr2	3340000	3350000	10001	*	1186.19695278495	215.736291726007	282.698292210579	283.94577597376	1817.46012196577	0.0032	2	0.5207	2	LS	1	7.75979693761941	10.828501573132	-3.2764851241262
Chr2	3350000	3360000	10001	*	510.911696977151	293.374206972031	989.98492182717	239.010008664325	50.4675368935875	0.0028	0	0.513	2	LS	1	8.20150745796406	5.68559083534057	-3.28208783035557
Chr2	3360000	3370000	10001	*	0	247.115166684218	471.175452589462	329.598101889052	11.9197432749752	0.0028	0	0.5653	2	LS	1	7.95486611618335	3.6915054977675	-3.28208783035557
Chr2	3370000	3380000	10001	*	99.0108966132859	165.56141845672	511.620745846104	288.999399825597	86.0627335541785	0.0028	2	0.5359	2	LS	1	7.37991044973844	6.44398341277501	-3.28208783035557
Chr2	3380000	3390000	10001	*	202.276167690424	323.65664869543	870.044910676971	270.274592046215	127.781835016592	0.0033	1	0.5303	2	LS	1	8.34277094462482	7.00878530201886	-3.27508784068439
Chr2	3390000	3400000	10001	*	1.54704525958259	186.60249434384	848.478740502161	324.563334842632	9.78731213862639	0.0027	0	0.5415	2	LS	1	7.55153519968327	3.43126352993173	-3.28349191323125
Chr2	3400000	3410000	10001	*	1.16028394468694	227.483790670429	772.543487588913	261.430750305499	228.006098424984	0.0032	0	0.5272	2	LS	1	7.83594800954877	7.83924220753071	-3.2764851241262
Chr2	3410000	3420000	10001	*	492.733915177056	227.32715735117	778.371239076281	249.796101363023	1.01153784672954	0.0038	0	0.5414	2	LS	1	7.83495865444348	1.00829888227146	-3.26812165119157
Chr2	3420000	3430000	10001	*	364.715919946596	286.847818669574	1001.53573465543	230.128453312775	7.62754214155521	0.0036	1	0.5129	2	LS	1	8.16916246922906	3.10894961557638	-3.2709040918629
Chr2	3430000	3440000	10001	*	1152.54871838903	464.678847134913	1228.01541820643	238.331163669302	4.72962290497868	0.0058	4	0.4943	2	LS	1	8.86319154084718	2.51844019116026	-3.24058846743542
Chr2	3440000	3450000	10001	*	237.858208660823	816.268437764857	675.460825086774	227.394216527266	0.0820165821672603	0.01	5	0.4851	2	LS	1	9.674666209668	0.113722608986502	-3.18442457113743
Chr2	3450000	3460000	10001	*	476.876701266334	789.640773490834	1547.63443540883	201.730104354315	1.44895961828827	0.0071	3	0.4763	2	LS	1	9.62687854690066	1.29216898501844	-3.22296961479919
Chr2	3480000	3490000	10001	*	1.16028394468694	197.096926734191	948.946384407143	247.816136794206	10.3067504923524	0.0028	2	0.5342	2	LS	1	7.63006268827706	3.49911245992104	-3.28208783035557
Chr2	3490000	3500000	10001	*	1252.33313763211	118.205944934095	554.404119040793	274.611657292194	140.084322341681	0.0036	2	0.5266	2	LS	1	6.89731237618778	7.14041387057628	-3.2709040918629
Chr2	3500000	3510000	10001	*	1.54704525958259	209.418747849229	411.502069096055	322.357088608807	561.184794049117	0.0028	3	0.5251	2	LS	1	7.71711944109762	9.13490062206536	-3.28208783035557
Chr2	3510000	3520000	10001	*	327.973595031509	181.642439233973	458.787118589369	304.518550684038	54.0215887875021	0.0029	4	0.535	2	LS	1	7.51287822212003	5.78192589398817	-3.28068511265548
Chr2	3520000	3530000	10001	*	73.8714111450687	144.990242527377	481.749157383908	300.558621546404	14.0248355506015	0.0027	1	0.5308	2	LS	1	7.18972813745683	3.90927729536592	-3.28349191323125
Chr2	3530000	3540000	10001	*	1.16028394468694	275.726853002188	812.395536682171	263.24100362556	34.6109976745838	0.0026	1	0.5349	2	LS	1	8.11231883666213	5.15425094957211	-3.2848973639424
Chr2	3540000	3550000	10001	*	3.09409051916518	269.252675806151	789.712671611578	246.684728469168	230.712645636503	0.0033	1	0.5174	2	LS	1	8.07816509211265	7.8561929707027	-3.27508784068439
Chr2	3550000	3560000	10001	*	262.224171499249	169.581673651033	699.225488337657	249.796101363023	183.525772029606	0.0032	2	0.5303	2	LS	1	7.41431884960227	7.52767851599377	-3.2764851241262
Chr2	3560000	3570000	10001	*	572.793507360455	186.70691655668	477.282377800775	294.543300618284	21.1329393384307	0.0027	2	0.5279	2	LS	1	7.55233800082885	4.46812315413217	-3.28349191323125
Chr2	3570000	3580000	10001	*	4.25437446385213	189.6829496226	522.543417795482	315.568638658578	6.09656594109968	0.003	0	0.5538	2	LS	1	7.57503203712411	2.8271210671165	-3.27928375747887
Chr2	3580000	3590000	10001	*	1.93380657447824	212.760258660087	311.627669354458	277.553318937294	73.8422628112567	0.0039	1	0.537	2	LS	1	7.73984984843005	6.22578127315108	-3.26673244064524
Chr2	3590000	3600000	10001	*	2.32056788937389	254.42472158297	640.005762145662	229.3930379015	165.646157117143	0.0035	0	0.5152	2	LS	1	7.99675435451436	7.38064423886427	-3.27229732716276
Chr2	3600000	3610000	10001	*	69.230275366321	2096.32813385549	591.604017756566	262.958151544301	387.719722765362	0.0028	1	0.5187	2	LS	1	11.0343368781194	8.60258649841382	-3.28208783035557
Chr2	3610000	3620000	10001	*	269.572636482267	158.460707983647	170.051694598463	254.265164246924	367.160899502102	0.003	3	0.5383	2	LS	1	7.31705716937309	8.52419260329084	-3.27928375747887
Chr2	3620000	3630000	10001	*	39.8364154342517	1190.62207079377	711.962789492683	25.4566873133601	31.6037229951176	0.0108	3	0.2037	0	Core	0	10.2187110346863	5.02696480903446	-3.17397021350026
Chr2	3630000	3640000	10001	*	1133.21065264425	1411.42283984248	678.636426196657	11.7855033858148	0	0.0271	5	0.1828	0	Core	0	10.4639563404255	0	-2.97596406454449
Chr2	3640000	3650000	10001	*	1.54704525958259	1016.65466420349	605.213736798921	111.651144875855	7.21745923071891	0.0061	7	0.3329	0	Core	0	9.99103235809464	3.03869239368033	-3.23650343863468
Chr2	3650000	3660000	10001	*	217.359858971354	492.872844601526	600.502680207337	154.90865650315	0.246049746501781	0.0039	4	0.3726	0	Core	0	8.94799583466894	0.317361666755792	-3.26673244064524
Chr2	3660000	3670000	10001	*	319.07808478891	396.073453299489	422.28515418346	156.436057741952	74.9904949615983	0.0064	4	0.3967	0	Core	0	8.63326210119515	6.2477470696364	-3.23242994404826
Chr2	3670000	3680000	10001	*	0.773522629791296	115.804234038791	144.158331702494	299.182074750941	183.088350258047	0.0033	0	0.5555	0	Core	0	6.86794876121913	7.52425452066279	-3.27508784068439
Chr2	3680000	3690000	10001	*	1998.78247538071	143.841598186144	223.408772587597	294.430159785781	142.189414617307	0.0031	0	0.5704	0	Core	0	7.1783321905257	7.16178103402787	-3.27788376218134
Chr2	3690000	3700000	10001	*	867.118867996043	267.529709294303	542.957996359016	223.283432946294	23.3200481962243	0.0041	4	0.5038	0	Core	0	8.06893790212114	4.60407418273074	-3.26395802625003
Chr2	3700000	3710000	10001	*	1.16028394468694	166.814485010792	131.246546970002	423.184427175131	71.6824928141855	0.0032	0	0.5867	0	Core	0	7.39072343803948	6.18353599587092	-3.2764851241262
Chr2	3710000	3720000	10001	*	1.16028394468694	123.844744427417	207.495870322689	385.678241200113	5.82317733387548	0.003	0	0.5553	0	Core	0	6.96399127937811	2.77044371232377	-3.27928375747887
Chr2	3720000	3730000	10001	*	621.912194352202	102.124924156842	143.355707246149	307.950489269987	398.54591161144	0.0033	0	0.574	0	Core	0	6.68824924810444	8.64221748178505	-3.27508784068439
Chr2	3730000	3740000	10001	*	986.241352983902	167.597651607087	327.57546833486	260.035346704619	18.809136177025	0.0031	0	0.5503	0	Core	0	7.39744063092776	4.30809406444872	-3.27788376218134
Chr2	3740000	3750000	10001	*	20.1115883745737	192.71119379494	198.527414440931	255.641711042387	108.343905042951	0.0034	0	0.5413	0	Core	0	7.59776351369957	6.77272899489438	-3.27369190923451
Chr2	3750000	3760000	10001	*	590.584527845654	139.664709672572	177.484694998519	367.877416886179	377.166922526508	0.0031	0	0.5568	0	Core	0	7.13611661666862	8.56287936904884	-3.27788376218134
Chr2	3760000	3770000	10001	*	4.64113577874777	78.7343484808369	107.028226417707	349.209179523048	272.70513570614	0.003	0	0.5864	0	Core	0	6.31712944655296	8.09647869494989	-3.27928375747887
Chr2	3770000	3780000	10001	*	1.93380657447824	100.610802070672	138.400373646112	335.971702120101	136.147526397652	0.0034	0	0.5547	0	Core	0	6.66690997048127	7.09958479164723	-3.27369190923451
Chr2	3780000	3790000	10001	*	1.93380657447824	376.911977243476	307.893720796684	215.118436200601	287.085376446133	0.0038	5	0.4752	0	Core	0	8.56190643273339	8.1703526192274	-3.26812165119157
Chr2	3790000	3800000	10001	*	254.875706516232	1559.12805990368	635.364498985064	20.7047723481995	0	0.0345	4	0.2033	0	Core	0	10.6074487392658	0	-2.89432192210546
Chr2	3800000	3810000	10001	*	252.941899941754	599.853401655395	493.614040651603	186.682373631307	22.9373041461105	0.0053	4	0.4173	0	Core	0	9.23086922979018	4.58118877791071	-3.24742265852373
Chr2	3810000	3820000	10001	*	75.4184564046514	1009.03184266622	604.201732049618	11.9929282454052	0	0.0376	5	0.1776	0	Core	0	9.98018506133468	0	-2.86144762484735
Chr2	3820000	3830000	10001	*	0.386761314895648	201.69150409912	144.856266012358	260.808475726728	403.029484769917	0.0034	2	0.5452	0	Core	0	7.66314180866862	8.65831676982897	-3.27369190923451
Chr2	3830000	3840000	10001	*	645.891395875732	146.713209039225	136.690434586944	291.526211751516	323.391383485507	0.0029	0	0.5774	0	Core	0	7.20665503255518	8.34159168883724	-3.28068511265548
Chr2	3840000	3850000	10001	*	0.773522629791296	130.162288304195	155.778937961736	207.632284449931	2389.77183232891	0.003	0	0.5453	0	Core	0	7.0352091666116	11.2232607350484	-3.27928375747887
Chr2	3850000	3860000	10001	*	567.378848951916	164.987096286104	332.635492081377	264.523266393937	48.8818829716871	0.0027	0	0.5417	0	Core	0	7.37492728166241	5.64044402081359	-3.28349191323125
Chr2	3860000	3870000	10001	*	565.058281062542	148.749442189592	339.440351602555	230.260450950696	225.02616260624	0.0031	1	0.5387	0	Core	0	7.22640681882011	7.82034596452897	-3.27788376218134
Chr2	3870000	3880000	10001	*	1048.896685997	115.334334081014	286.048376897928	280.249842111968	200.147799348838	0.003	1	0.5458	0	Core	0	6.86213313609743	7.65211214406496	-3.27928375747887
Chr2	3880000	3890000	10001	*	0.773522629791296	108.076990288682	108.598578614902	309.195038427529	398.299861864938	0.0032	0	0.6002	0	Core	0	6.76920298806777	8.64132876265527	-3.2764851241262
Chr2	3890000	3900000	10001	*	0	127.186255238275	143.285913815163	305.348250122399	137.323097408716	0.0033	0	0.5599	0	Core	0	7.00209776715533	7.11189826986931	-3.27508784068439
Chr2	3900000	3910000	10001	*	763.080074289113	144.57255367602	412.688557422825	231.297575248648	119.142755028307	0.0031	4	0.5077	0	Core	0	7.1855945644868	6.90860584198883	-3.27788376218134
Chr2	3910000	3920000	10001	*	442.841705555517	164.934885179684	305.206673703706	241.272825314401	97.1076332860362	0.003	6	0.4889	0	Core	0	7.37447341172225	6.6162934849046	-3.27928375747887
Chr2	3920000	3930000	10001	*	293.165076690901	122.696100086185	138.644650654565	286.133165402167	64.7930999121356	0.0027	0	0.5624	0	Core	0	6.95065620524653	6.03986438333832	-3.28349191323125
Chr2	3930000	3940000	10001	*	445.549034759786	112.567145440772	152.254369696921	323.846776236774	582.208377944658	0.0038	0	0.5623	0	Core	0	6.82740171858561	9.18786763428936	-3.26812165119157
Chr2	3940000	3950000	10001	*	733.299453042148	109.434479055593	140.319692998239	316.247483653601	233.227820822966	0.0024	0	0.5587	0	Core	0	6.78704686004794	7.87176863444204	-3.28771237954945
Chr2	3950000	3960000	10001	*	30.1673825618605	80.0918372477479	178.357112885849	327.900989401495	208.048730097617	0.0033	0	0.5494	0	Core	0	6.34148479410325	7.70769546928481	-3.27508784068439
Chr2	3960000	3970000	10001	*	2.32056788937389	83.694403590704	98.6181179838409	276.365340196004	264.886221539528	0.0031	0	0.5904	0	Core	0	6.40419473765989	8.05466520716724	-3.27788376218134
Chr2	3970000	3980000	10001	*	0.773522629791296	78.6299262679976	169.667830728038	255.13257729612	156.5696553573	0.0034	0	0.5499	0	Core	0	6.31523881666844	7.29984591821975	-3.27369190923451
Chr2	3980000	3990000	10001	*	1.54704525958259	48.921806715215	142.343702496846	278.854438511088	137.733180319552	0.0033	0	0.5618	0	Core	0	5.64159824246721	7.11616906292779	-3.27508784068439
Chr2	3990000	4000000	10001	*	229.349459733119	102.33376858252	157.628463882877	304.631691516542	901.116188271689	0.0034	0	0.5589	0	Core	0	6.69116798130006	9.81716944747745	-3.27369190923451
Chr2	4000000	4010000	10001	*	0.386761314895648	43.3874294347318	128.454809730544	285.096041104215	858.932326176994	0.0038	0	0.5636	0	Core	0	5.47207925659954	9.74807931874012	-3.26812165119157
Chr2	4010000	4020000	10001	*	8.12198761280861	86.1483255924277	121.998917364299	284.002346390012	62.3326024471178	0.003	0	0.5647	0	Core	0	6.44540104056125	5.98487645836764	-3.27928375747887
Chr2	4020000	4030000	10001	*	0.386761314895648	133.503799115053	119.905114434705	288.641120522668	1338.31924894463	0.0025	1	0.5596	0	Core	0	7.07150311264614	10.3872841765951	-3.28630418515664
Chr2	4030000	4040000	10001	*	0.386761314895648	121.96514459631	146.670895218005	251.681781904753	710.536990175698	0.0028	0	0.5462	0	Core	0	6.94210562042613	9.47479494885379	-3.28208783035557
Chr2	4040000	4050000	10001	*	163.213274885963	52.2633175260728	134.526838226365	344.212126087462	134.917277665143	0.0031	0	0.5795	0	Core	0	5.73507038504602	7.08658505145357	-3.27788376218134
Chr2	4050000	4060000	10001	*	0.386761314895648	82.3891259302126	143.530190823616	278.100166294396	1444.50338399051	0.0031	0	0.5523	0	Core	0	6.38178736117865	10.4973562708971	-3.27788376218134
Chr2	4060000	4070000	10001	*	1.54704525958259	121.025344680756	136.550847724971	339.667635981892	100.88039606573	0.0032	0	0.5695	0	Core	0	6.93103701664269	6.67073266306792	-3.2764851241262
Chr2	4070000	4080000	10001	*	1162.60451257632	86.3049589116866	110.134034096604	380.021199574922	64.5743890263563	0.0031	0	0.5836	0	Core	0	6.44799169598281	6.03506055547519	-3.27788376218134
Chr2	4080000	4090000	10001	*	0.386761314895648	75.4450487763988	126.395903516444	333.727742275442	107.66043352489	0.0032	0	0.5834	0	Core	0	6.25635115844788	6.7636828978598	-3.2764851241262
Chr2	4090000	4100000	10001	*	0.773522629791296	72.2601712847999	282.768085641565	385.942236475956	58.9699225782602	0.0028	1	0.5643	0	Core	0	6.1949571690084	5.90616720515926	-3.28208783035557
Chr2	4100000	4110000	10001	*	44.8643125278952	130.266710517035	605.772084246813	274.856795762619	0.628793796615662	0.0041	1	0.5369	0	Core	0	7.03635728223334	0.703803971923555	-3.26395802625003
Chr2	4110000	4120000	10001	*	0.386761314895648	93.5100915975988	158.884745640633	332.954613253332	30.3734742626087	0.0036	1	0.5622	0	Core	0	6.56239648052252	4.97147339531204	-3.2709040918629
Chr2	4120000	4130000	10001	*	1.16028394468694	132.45957698666	126.046936361512	295.806706581244	1570.28948217437	0.0032	0	0.5608	0	Core	0	7.0602590259808	10.6177332807138	-3.2764851241262
Chr2	4130000	4140000	10001	*	0.386761314895648	85.9394811667491	145.379716744756	400.631687896035	101.864595051737	0.0025	0	0.5842	0	Core	0	6.44193958088303	6.68460269647083	-3.28630418515664
Chr2	4140000	4150000	10001	*	407.259664585117	37.7486299414092	130.443922513658	355.97877266786	38.6024713400572	0.0025	0	0.5783	0	Core	0	5.27607339594062	5.30751855748507	-3.28630418515664
Chr2	4150000	4160000	10001	*	919.718406821851	73.8265044773895	148.694904716612	313.117253954329	21.9257662993809	0.0035	1	0.5891	0	Core	0	6.22547747603137	4.51889805195044	-3.27229732716276
Chr2	4160000	4170000	10001	*	0	78.3688707358994	103.433864721905	297.786671150061	15373.8169552279	0.0029	2	0.5974	0	Core	0	6.31050137378109	13.9082816141082	-3.28068511265548
Chr2	4170000	4180000	10001	*	785.512230553061	95.8073802800635	102.666136981054	407.212712986674	1161.08141488118	0.0029	0	0.5985	0	Core	0	6.59704513296133	10.1824954314861	-3.28068511265548
Chr2	4180000	4190000	10001	*	0.386761314895648	56.2313616139664	123.080715544588	309.968167449639	150.58244485909	0.0033	0	0.6019	0	Core	0	5.83873402591104	7.24395887084803	-3.27508784068439
Chr2	4190000	4200000	10001	*	0.386761314895648	119.197955956068	146.1823412011	436.384190967243	35.9779407107048	0.0034	0	0.5669	0	Core	0	6.90926855207076	5.20859297865659	-3.27369190923451
Chr2	4200000	4210000	10001	*	308.635529286727	90.9517473830358	204.529649505765	342.326445545732	84.5864350751678	0.003	0	0.5604	0	Core	0	6.52280508569518	6.41931025132021	-3.27928375747887
Chr2	4210000	4220000	10001	*	336.482343959214	68.6053938354242	166.108365747729	357.581601128331	460.632464312056	0.0035	1	0.5646	0	Core	0	6.12112720208354	8.85060087488268	-3.27229732716276
Chr2	4220000	4230000	10001	*	1.54704525958259	81.3449038018196	156.511768987094	372.440763797166	55.5525649879576	0.003	0	0.5776	0	Core	0	6.36360746144679	5.821520555203	-3.27928375747887
Chr2	4230000	4240000	10001	*	0.773522629791296	108.129201395102	228.294312756648	295.41071366748	180.053736717859	0.0026	0	0.5825	0	Core	0	6.76989338741132	7.50027414227891	-3.2848973639424
Chr2	4240000	4250000	10001	*	1.16028394468694	127.551732983213	454.913583169621	276.648192277263	312.319144892927	0.0035	3	0.5405	0	Core	0	7.00620524879448	8.29148911587763	-3.27229732716276
Chr2	4250000	4260000	10001	*	0.773522629791296	157.259852535995	605.562703953854	268.426625115319	20.3127735167581	0.0031	1	0.5519	0	Core	0	7.30615150783185	4.41364644392099	-3.27788376218134
Chr2	4260000	4270000	10001	*	1.54704525958259	149.323764360208	385.050358752194	288.961686214763	510.799273737697	0.0032	0	0.5496	0	Core	0	7.23192928961104	8.99943428991534	-3.2764851241262
Chr2	4270000	4277765	7766	*	0.773522629791296	422.387850934994	690.745586472805	132.412487640307	18.0436480767973	0.0032	1	0.395235	0	Core	0	8.72583606174822	4.25123796839485	-3.2764851241262
Chr3	10000	20000	10001	*	1.54704525958259	180.650428212	154.487759488487	343.853846784534	1216.57930214769	0.0025	0	0.5611	0	Core	0	7.50502095645628	10.2498000241889	-3.28630418515664
Chr3	20000	30000	10001	*	1.54704525958259	104.056735094369	155.115900367365	341.270464442363	738.477305834012	0.0036	0	0.5729	0	Core	0	6.7150248446536	9.53036206223345	-3.2709040918629
Chr3	30000	40000	10001	*	0.386761314895648	136.323198861714	143.25101709967	268.162629839476	21.0509227562635	0.0031	0	0.5576	0	Core	0	7.10143155929133	4.46276712382347	-3.27788376218134
Chr3	40000	50000	10001	*	475.329656006751	143.737175973305	168.411548970282	426.861504231505	23.8941642713952	0.0033	0	0.5686	0	Core	0	7.17729171775218	4.63773567800565	-3.27508784068439
Chr3	50000	60000	10001	*	0	140.969987333063	127.373011550254	264.900402502283	29.9633913517724	0.0028	0	0.5583	0	Core	0	7.14944216385552	4.95249159022084	-3.28208783035557
Chr3	60000	70000	10001	*	389.855405414813	66.6213717914774	194.72367245217	274.479659654273	114.003049212492	0.0035	0	0.5609	0	Core	0	6.07940737844618	6.84552830333934	-3.27229732716276
Chr3	70000	80000	10001	*	0	93.771147129697	146.810482079978	328.730688839856	278.610329622183	0.0027	0	0.5729	0	Core	0	6.56637599548015	8.12727384884081	-3.28349191323125
Chr3	80000	90000	10001	*	0.773522629791296	140.395665162447	110.20382752759	347.474353424656	161.025889655054	0.0029	0	0.5789	0	Core	0	7.14359408117732	7.34008054543218	-3.28068511265548
Chr3	90000	100000	10001	*	0.773522629791296	164.360563009068	146.252134632087	266.540944573588	311.416962489087	0.0032	0	0.5634	0	Core	0	7.36947139565488	8.2873289756315	-3.2764851241262
Chr3	100000	110000	10001	*	724.403942799549	148.070697806136	147.613106536322	269.803171910782	35.3764857748116	0.003	1	0.5458	0	Core	0	7.21985289082784	5.1849342700884	-3.27928375747887
Chr3	110000	120000	10001	*	520.580729849542	167.12775164931	136.341467432012	318.340589054922	350.429516739981	0.0029	0	0.5728	0	Core	0	7.39341406938943	8.45709155888434	-3.28068511265548
Chr3	120000	130000	10001	*	1283.66080413866	491.880833579552	371.056775839413	231.090150389057	261.414186227781	0.004	4	0.4718	0	Core	0	8.94509507048491	8.03570190457541	-3.26534456652099
Chr3	130000	140000	10001	*	3.86761314895648	1427.60828283258	671.412806089561	51.7053604542469	0	0.0254	8	0.2079	0	Core	0	10.4803946756336	0	-2.99539074674741
Chr3	140000	150000	10001	*	55.6936293449733	1766.14509685761	745.987087098573	27.6817903526019	0	0.026	6	0.2336	0	Core	0	10.7872047863076	0	-2.98850436116217
Chr3	150000	160000	10001	*	290.070986171736	523.572975176282	449.609282414652	216.985259936914	23.0466595890001	0.0032	4	0.4703	0	Core	0	9.03499967487773	4.58776459266253	-3.2764851241262
Chr3	160000	170000	10001	*	1058.56571886939	859.812500518848	700.132802940481	81.0842632944061	23.7301311070606	0.0104	8	0.2651	0	Core	0	9.7495552183031	4.62819798309903	-3.17918792277128
Chr3	170000	180000	10001	*	404.552335380848	339.476613940585	208.403184925512	244.912188759941	71.5731373712958	0.0037	1	0.5208	0	Core	0	8.41141189811304	6.18136373466829	-3.26951220073622
Chr3	180000	190000	10001	*	0.386761314895648	147.600797848359	229.515697798911	238.444304501806	212.723675281151	0.0028	0	0.5449	0	Core	0	7.21529805160535	7.73960292144492	-3.28208783035557
Chr3	190000	200000	10001	*	1.54704525958259	175.899217527811	278.405996204912	289.697101626037	83.3835252033813	0.0032	0	0.5538	0	Core	0	7.46678385639415	6.39888945368429	-3.2764851241262
Chr3	200000	210000	10001	*	2.32056788937389	238.187067486458	183.905690649272	347.757205505916	498.250736666106	0.0031	0	0.5714	0	Core	0	7.90199557689627	8.96362074620462	-3.27788376218134
Chr3	210000	220000	10001	*	63.0420943279906	888.424186836818	705.925657712356	177.367111755159	6.61600429482566	0.0031	5	0.4078	0	Core	0	9.79672782737968	2.92903429221229	-3.27788376218134
Chr3	220000	230000	10001	*	1083.70520433761	1541.53291704026	1379.01350614559	96.4714165149259	42.238539816139	0.0066	5	0.3358	0	Core	0	10.5910855609049	5.43424589835805	-3.22972065679027
Chr3	230000	240000	10001	*	1.54704525958259	1209.05259135991	809.254832287781	88.3818469909026	9.81465099934882	0.0051	5	0.3301	0	Core	0	10.2408540360011	3.43491520358689	-3.25016542558727
Chr3	240000	250000	10001	*	504.336754623925	1873.75218718851	824.260419949866	53.4967569688907	0	0.0244	7	0.2072	0	Core	0	10.8724841912347	0	-3.00694160941885
Chr3	250000	260000	10001	*	47.9584030470603	1765.10087472921	684.708454692478	14.3877425334028	0	0.0169	3	0.1766	0	Core	0	10.7863520326968	0	-3.09665316501779
Chr3	260000	270000	10001	*	1.16028394468694	1010.07606479461	482.97054242617	147.21507989289	5.74116075170822	0.0039	3	0.3359	0	Core	0	9.98167582213445	2.75299702858078	-3.26673244064524
Chr3	270000	280000	10001	*	526.382149572977	253.015021709639	243.230106987746	297.635816706722	190.114437463709	0.0027	0	0.5429	0	Core	0	7.98877000608393	7.57829295851675	-3.28349191323125
Chr3	280000	290000	10001	*	0.386761314895648	284.341685561431	497.59226621783	274.272234794683	31.6857395772849	0.0031	0	0.5331	0	Core	0	8.15654671538222	5.03058943616238	-3.27788376218134
Chr3	290000	300000	10001	*	1283.66080413866	202.422459588995	498.46468410516	237.822029923035	9.40456808851251	0.0032	0	0.5347	0	Core	0	7.66833516370391	3.37914517245516	-3.2764851241262
Chr3	300000	310000	10001	*	2.32056788937389	75.2884154571398	108.877752338848	320.414837650825	958.445779206604	0.0033	0	0.5903	0	Core	0	6.25339209255767	9.90605746802443	-3.27508784068439
Chr3	310000	320000	10001	*	437.813808461873	179.449572764348	199.783696198687	372.421906991749	19.7113185808649	0.0028	0	0.5704	0	Core	0	7.4954519172632	4.37234750018497	-3.28208783035557
Chr3	320000	330000	10001	*	963.422435405059	79.3086706514531	366.555099540787	265.824385967731	213.625857684991	0.0029	0	0.551	0	Core	0	6.32748385386963	7.74568008929234	-3.28068511265548
Chr3	330000	340000	10001	*	2.32056788937389	205.294070442076	669.179416297995	277.93045504564	2.43315860429539	0.0031	2	0.5148	0	Core	0	7.68855854387962	1.77953650813843	-3.27788376218134
Chr3	340000	350000	10001	*	965.356241979537	229.885501565733	774.218529932588	260.318198785878	138.580685001947	0.0031	2	0.5285	0	Core	0	7.85103377182595	7.12495550682499	-3.27788376218134
Chr3	350000	360000	10001	*	3.48085183406083	210.097492232684	757.712383504295	256.905117005346	60.6649319430502	0.003	1	0.5299	0	Core	0	7.721765629829	5.94637837527039	-3.27928375747887
Chr3	360000	370000	10001	*	494.667721751534	161.175685517469	384.422217873316	249.098399562582	59.6260552355982	0.0033	0	0.5461	0	Core	0	7.34141372688335	5.92186604833083	-3.27508784068439
Chr3	370000	380000	10001	*	0	136.532043287393	459.415259468247	270.086023992041	11.8377266928079	0.0033	0	0.5561	0	Core	0	7.10362397791047	3.68231784724016	-3.27508784068439
Chr3	380000	390000	10001	*	2.32056788937389	115.804234038791	121.649950209366	294.449016591198	146.809682079396	0.0032	0	0.5877	0	Core	0	6.86794876121913	7.20759696420082	-3.2764851241262
Chr3	390000	400000	10001	*	494.667721751534	105.831912712637	106.853742840241	333.840883107945	35.1304360283098	0.0037	0	0.5765	0	Core	0	6.73919886147268	5.17514276045441	-3.26951220073622
Chr3	400000	410000	10001	*	0.773522629791296	109.382267949173	172.110600812563	335.104289070905	45.4645253813846	0.003	0	0.572	0	Core	0	6.78636462279251	5.53805776619594	-3.27928375747887
Chr3	410000	420000	10001	*	189.126282983972	85.7828478474901	125.034931612209	351.735991448967	139.209478798563	0.003	1	0.6012	0	Core	0	6.43933802499267	7.13144007516765	-3.27928375747887
Chr3	420000	430000	10001	*	0	55.0305061663144	79.0410605921442	326.128449692268	22.1718160458827	0.0031	0	0.6355	0	Core	0	5.80814062047944	4.53429921193074	-3.27788376218134
Chr3	430000	440000	10001	*	0.773522629791296	64.6895608539502	106.888639555734	343.193858594928	154.327868778061	0.0033	0	0.5962	0	Core	0	6.03759221580249	7.27917288969192	-3.27508784068439
Chr3	440000	450000	10001	*	2.32056788937389	89.1243586583479	133.096072891143	360.862685270942	176.22629621672	0.0033	0	0.5792	0	Core	0	6.49384518279186	7.46944887158417	-3.27508784068439
Chr3	450000	460000	10001	*	0.773522629791296	77.8467596717028	99.5254325866646	375.250427804344	37.9189998219967	0.0028	0	0.6182	0	Core	0	6.30097956136005	5.28240272971383	-3.28208783035557
Chr3	460000	470000	10001	*	893.805398723842	94.2410470874739	117.322757488207	345.984665796689	125.157304387239	0.0032	0	0.5874	0	Core	0	6.57351157668421	6.97907992916996	-3.2764851241262
Chr3	470000	480000	10001	*	1.16028394468694	74.1919822223271	129.571504626327	290.262805788556	2325.38881532761	0.0034	0	0.5521	0	Core	0	6.23250692933315	11.1838765229464	-3.27369190923451
Chr3	480000	490000	10001	*	0	98.8878355588231	109.087132631807	274.253377989266	351.030971675874	0.0031	1	0.5641	0	Core	0	6.64223709074769	8.45955855249395	-3.27788376218134
Chr3	490000	500000	10001	*	0.386761314895648	62.6011165971641	118.893109685402	276.289912974334	213.106419331265	0.0023	0	0.586	0	Core	0	5.99098018893552	7.74218424097945	-3.28912194980412
Chr3	500000	510000	10001	*	2.70732920426954	118.93690042397	104.899526772621	314.399516722705	1096.4796869941	0.0032	0	0.5848	0	Core	0	6.90613178404299	10.0999785221502	-3.2764851241262
Chr3	510000	520000	10001	*	296.259167210066	111.679556631638	128.210532722092	230.034169285688	236.809211577603	0.003	0	0.5604	0	Core	0	6.81608198193535	7.89366078896232	-3.27928375747887
Chr3	520000	530000	10001	*	2.70732920426954	100.297535432154	147.927176975761	266.314662908581	569.5778242909	0.0032	0	0.5465	0	Core	0	6.66245526358738	9.15627986693052	-3.2764851241262
Chr3	530000	540000	10001	*	529.476240092142	109.486690162013	127.373011550254	291.620495778602	155.421423206958	0.003	0	0.5579	0	Core	0	6.78772877483211	7.28929430496377	-3.27928375747887
Chr3	540000	550000	10001	*	0.773522629791296	70.3283603472728	111.634592862812	287.415428170544	294.494207701909	0.0027	0	0.579	0	Core	0	6.15640390503853	8.20698604064578	-3.28349191323125
Chr3	550000	560000	10001	*	0.386761314895648	92.570291682045	129.082950609422	257.904527692463	130.570398810278	0.0032	0	0.5721	0	Core	0	6.54797864556953	7.0396911325464	-3.2764851241262
Chr3	560000	570000	10001	*	848.554324881052	84.6342035062577	150.230360198314	265.748958746062	529.253004725331	0.0035	0	0.5584	0	Core	0	6.42011523932871	9.05053708071217	-3.27229732716276
Chr3	570000	580000	10001	*	1350.9572729305	92.1003917242681	124.755757888263	284.43605291461	2344.19795150463	0.0034	0	0.5713	0	Core	0	6.5407153328913	11.1954939863371	-3.27369190923451
Chr3	580000	590000	10001	*	934.415336787885	80.7705816312034	126.640180524897	317.039469481128	2563.42827563772	0.0035	0	0.5849	0	Core	0	6.35350999712004	11.3244215058783	-3.27229732716276
Chr3	590000	600000	10001	*	1.16028394468694	89.0199364455086	131.281443685495	252.360626899776	461.097224944337	0.0033	1	0.5564	0	Core	0	6.49217264106182	8.85205261541623	-3.27508784068439
Chr3	600000	610000	10001	*	5.41465840853907	30.700130574756	139.13320467147	283.266930978737	54.2676385340039	0.0028	1	0.5623	0	Core	0	4.98641687781246	5.78836306553488	-3.28208783035557
Chr3	610000	620000	10001	*	1.93380657447824	98.7312022395641	99.0019818542663	271.91513411752	884.603516395347	0.0028	1	0.5656	0	Core	0	6.63997303655925	9.79051714029985	-3.28208783035557
Chr3	620000	630000	10001	*	622.298955667098	77.2724375010866	134.980495527777	316.60576295653	1833.86343839922	0.0033	1	0.5637	0	Core	0	6.29043246778195	10.8414569776621	-3.27508784068439
Chr3	630000	640000	10001	*	0.386761314895648	84.2165146549005	134.980495527777	246.986437355844	348.406441046522	0.003	1	0.5584	0	Core	0	6.41306114155818	8.44876239327904	-3.27928375747887
Chr3	640000	650000	10001	*	1.54704525958259	48.2952734381792	120.49835859809	287.924561916811	908.142275477351	0.0031	0	0.5756	0	Core	0	5.6233774186873	9.82836227524336	-3.27788376218134
Chr3	650000	660000	10001	*	1650.31053065973	145.564564697993	160.524891268814	297.277537403793	105.746713274321	0.003	1	0.5588	0	Core	0	7.19539253121391	6.73804783980001	-3.27928375747887
Chr3	660000	670000	10001	*	2.32056788937389	72.9389156682554	133.061176175649	289.414249544778	389.496748712319	0.003	0	0.5681	0	Core	0	6.20826198110252	8.60916672626966	-3.27928375747887
Chr3	670000	680000	10001	*	0.386761314895648	65.6815718759236	112.786184474088	285.680602072152	138.71737930556	0.0028	0	0.5906	0	Core	0	6.05921620807299	7.12636767708241	-3.28208783035557
Chr3	680000	690000	10001	*	0.773522629791296	91.8915472985895	110.064240665617	268.935758861586	195.035432393745	0.0038	0	0.5761	0	Core	0	6.53747541888798	7.61497062737436	-3.26812165119157
Chr3	690000	700000	10001	*	1.16028394468694	52.5765841645907	70.3866751498255	271.179718706245	601.42759703252	0.0037	0	0.6102	0	Core	0	5.743530698354	9.23464405073744	-3.26951220073622
Chr3	700000	710000	10001	*	366.262965206179	40.0981297302936	120.114494727665	295.938704219165	83.0827977354347	0.0029	0	0.5688	0	Core	0	5.36100083696405	6.39373876861045	-3.28068511265548
Chr3	710000	720000	10001	*	366.262965206179	96.642757982778	150.753810930712	276.780189915184	863.579932499806	0.0025	0	0.5776	0	Core	0	6.60944114043538	9.75585554044412	-3.28630418515664
Chr3	720000	730000	10001	*	1.93380657447824	69.545193750978	150.335050344794	259.526212958351	414.320434248277	0.0035	0	0.5553	0	Core	0	6.14047589014322	8.69808104555719	-3.27229732716276
Chr3	730000	740000	10001	*	1.54704525958259	49.9138177371884	101.165578214846	302.783724585646	266.007114829148	0.0028	0	0.5936	0	Core	0	5.66998534402874	8.06073437510317	-3.28208783035557
Chr3	740000	750000	10001	*	257.969797035397	107.502668118066	120.149391443158	287.189146505536	288.643691507311	0.003	0	0.5546	0	Core	0	6.76158670924977	8.17813543296421	-3.27928375747887
Chr3	750000	760000	10001	*	1.54704525958259	64.8984052796288	156.825839426533	264.617550421023	76.7675209085556	0.0029	0	0.5591	0	Core	0	6.04217164778368	6.28109584383091	-3.28068511265548
Chr3	760000	770000	10001	*	60.7215264386167	99.8798465807965	111.146038845907	272.443124669204	118.404605788801	0.0029	0	0.5803	0	Core	0	6.65649417648834	6.89971467646545	-3.28068511265548
Chr3	770000	780000	10001	*	328.747117661301	48.8173845023757	106.574569116295	304.518550684038	251.244130039041	0.0037	0	0.5985	0	Core	0	5.63857737450496	7.97867688661042	-3.26951220073622
Chr3	780000	790000	10001	*	1.54704525958259	146.713209039225	133.165866322129	256.018847150733	167.887943696382	0.0028	0	0.5765	0	Core	0	7.20665503255518	7.39992253277336	-3.28208783035557
Chr3	790000	800000	10001	*	0.386761314895648	121.234189106435	144.158331702494	277.289323661452	118.459283510246	0.0039	0	0.5513	0	Core	0	6.93350405558273	6.90037516373445	-3.26673244064524
Chr3	800000	810000	10001	*	477.26346258123	78.1600263102207	120.882222468515	283.17264695165	252.337684467937	0.0035	0	0.5715	0	Core	0	6.30670018677782	7.98491788645087	-3.27229732716276
Chr3	810000	820000	10001	*	2.32056788937389	88.3934031684728	114.496123533256	308.62933426501	754.634572520962	0.0035	0	0.5803	0	Core	0	6.48209646581178	9.56154490058452	-3.27229732716276
Chr3	820000	830000	10001	*	1.54704525958259	54.0907062507606	102.701033696548	315.83263393442	566.789260497213	0.0033	0	0.6076	0	Core	0	5.78373705294264	9.14921175110554	-3.27508784068439
Chr3	830000	840000	10001	*	500.469141474968	23.338364569585	103.747935161344	266.899223876517	2312.78560053457	0.0027	0	0.5746	0	Core	0	4.60516032347231	11.176039472627	-3.28349191323125
Chr3	840000	850000	10001	*	1.54704525958259	76.2282153726936	113.902879369871	308.346482183751	930.122719498176	0.0036	0	0.5642	0	Core	0	6.27105612814941	9.86282751345974	-3.2709040918629
Chr3	850000	860000	10001	*	0.773522629791296	55.3437728048323	129.013157178436	250.550373579715	1175.18826701395	0.0028	1	0.58	0	Core	0	5.81618426535535	10.1999032888401	-3.28208783035557
Chr3	860000	870000	10001	*	0.773522629791296	81.0838482697213	103.503658152892	276.516194639342	61.7311475112246	0.0029	0	0.5691	0	Core	0	6.35902646410595	5.97111004831572	-3.28068511265548
Chr3	870000	880000	10001	*	406.872903270222	69.7540381766566	110.866865121961	320.94282820251	182.240845575652	0.0041	0	0.5944	0	Core	0	6.14474058475673	7.51759731515971	-3.26395802625003
Chr3	880000	890000	10001	*	0.773522629791296	77.6901263524439	86.5438544231866	278.533872818994	139.29149538073	0.0033	1	0.6095	0	Core	0	6.29811071974335	7.13228374367955	-3.27508784068439
Chr3	890000	900000	10001	*	1340.12795611342	118.362578253354	122.417677950217	297.315251014628	31.7130784380073	0.0031	0	0.5688	0	Core	0	6.8992067932918	5.03179562435606	-3.27788376218134
Chr3	900000	910000	10001	*	1.54704525958259	50.6969843334832	115.124264412134	282.493801956627	17.2234822551247	0.0028	0	0.5606	0	Core	0	5.69200822041748	4.18772675941572	-3.28208783035557
Chr3	910000	920000	10001	*	728.271555948505	70.8504714114693	159.338402942044	288.339411635991	50.8502809437014	0.0036	0	0.5798	0	Core	0	6.16692571713376	5.69627990099407	-3.2709040918629
Chr3	920000	930000	10001	*	469.914997598212	109.016790204236	285.943686751448	249.381251643842	87.0469325401856	0.004	0	0.5632	0	Core	0	6.78157990712362	6.46020083788593	-3.26534456652099
Chr3	930000	940000	10001	*	1.93380657447824	111.627345525218	196.712785235283	258.809654352494	146.837020940118	0.003	0	0.5785	0	Core	0	6.81541334102877	7.2078637802248	-3.27928375747887
Chr3	940000	950000	10001	*	426.210969015004	91.9959695114288	122.312987803738	323.80906262594	145.306044739663	0.0029	0	0.5994	0	Core	0	6.5390962853889	7.19284556646767	-3.28068511265548
Chr3	950000	960000	10001	*	1674.67649349816	65.9426274080219	337.416342103948	240.575123513961	85.6799895040646	0.0022	0	0.5402	0	Core	0	6.06485327086155	6.43762707362542	-3.29053289861183
Chr3	960000	970000	10001	*	252.555138626858	69.545193750978	342.022708549053	250.701228023053	10.2520727709075	0.0038	1	0.5258	0	Core	0	6.14047589014322	3.4921188830728	-3.26812165119157
Chr3	970000	980000	10001	*	1.93380657447824	95.3374803222866	160.071233967402	294.392446174946	325.305103736077	0.0031	0	0.5747	0	Core	0	6.59002528605245	8.35007774256504	-3.27788376218134
Chr3	980000	990000	10001	*	1.54704525958259	97.1126579405548	159.652473381483	248.966401924661	164.060503195243	0.0029	0	0.5643	0	Core	0	6.616367371699	7.36685113339771	-3.28068511265548
Chr3	990000	1000000	10001	*	0.773522629791296	125.619922045685	146.496411640539	305.178538873644	1526.73867704355	0.0034	0	0.5553	0	Core	0	6.98436060224513	10.5771820730779	-3.27369190923451
Chr3	1000000	1010000	10001	*	1.16028394468694	134.234754604928	133.93359406298	215.363574671026	75.2638835688225	0.003	0	0.5464	0	Core	0	7.07932215391503	6.25292809386148	-3.27928375747887
Chr3	1010000	1020000	10001	*	83.9272053323556	66.0992607272809	141.575974755995	300.671762378908	74.7171063543741	0.0031	0	0.5807	0	Core	0	6.06822496636556	6.24254737217352	-3.27788376218134
Chr3	1020000	1030000	10001	*	0.386761314895648	25.1135421878532	112.541907465636	304.480837073204	3460.71702340827	0.0029	0	0.5906	0	Core	0	4.70672626108807	11.7572720816915	-3.28068511265548
Chr3	1030000	1040000	10001	*	456.76511289176	52.8898508031086	111.320522423373	257.206825892023	2135.79381621763	0.0032	0	0.584	0	Core	0	5.75194168744332	11.0612319906611	-3.2764851241262
Chr3	1040000	1050000	10001	*	1.16028394468694	83.1722925265074	161.397309156144	308.667047875845	1633.30555613954	0.0025	0	0.5643	0	Core	0	6.39527350617163	10.6744620252543	-3.28630418515664
Chr3	1050000	1060000	10001	*	0.773522629791296	94.1366248746346	112.088250164224	282.569229178297	214.227312620884	0.0037	0	0.5932	0	Core	0	6.57192893915978	7.74971735913024	-3.26951220073622
Chr3	1060000	1070000	10001	*	492.733915177056	51.2713065040994	152.114782834948	294.863866310379	70.7529715496232	0.0033	1	0.5639	0	Core	0	5.70794731432347	6.16496667512353	-3.27508784068439
Chr3	1070000	1080000	10001	*	1.93380657447824	102.229346369681	147.962073691255	325.072468588899	239.242370181898	0.0026	0	0.5508	0	Core	0	6.68970935281753	7.9083468031857	-3.2848973639424
Chr3	1080000	1090000	10001	*	100.944703187764	186.550283237421	140.040519274293	273.838528270085	121.739946796937	0.0034	0	0.5631	0	Core	0	7.55113363152598	6.93946105300991	-3.27369190923451
Chr3	1090000	1100000	10001	*	1.16028394468694	94.8153692580901	145.833374046168	320.150842374983	133.878400957691	0.0028	0	0.5781	0	Core	0	6.58218518481533	7.07551552748939	-3.28208783035557
Chr3	1100000	1110000	10001	*	0.386761314895648	91.8393361921699	204.215579066326	270.72715537623	629.422590412278	0.0027	0	0.5415	0	Core	0	6.5366643022349	9.30017542268422	-3.28349191323125
Chr3	1110000	1120000	10001	*	1.16028394468694	108.860156884977	131.351237116482	315.62520907483	79.5834235629649	0.0027	0	0.5621	0	Core	0	6.77952444697512	6.33241119414889	-3.28349191323125
Chr3	1120000	1130000	10001	*	0.773522629791296	55.1871394855734	123.673959707973	292.469052022381	150.199700808976	0.0032	0	0.5921	0	Core	0	5.81216804875727	7.24031147455968	-3.2764851241262
Chr3	1130000	1140000	10001	*	294.325360635588	57.2755837423595	188.128193223951	231.580427329907	198.261417958991	0.0035	0	0.5497	0	Core	0	5.86481964568705	7.6385185848103	-3.27229732716276
Chr3	1140000	1150000	10001	*	457.538635521551	83.694403590704	103.294277859932	261.939884051766	138.252618673278	0.0032	0	0.5788	0	Core	0	6.40419473765989	7.12156064776323	-3.2764851241262
Chr3	1150000	1160000	10001	*	0.773522629791296	115.543178506692	159.443093088524	390.147304084014	53.3927949908865	0.0034	0	0.5626	0	Core	0	6.86472075303535	5.76534365593399	-3.27369190923451
Chr3	1160000	1170000	10001	*	392.562734619083	177.100072975463	130.79288966859	366.972290226148	72.0925757250218	0.003	0	0.5498	0	Core	0	7.47654429735023	6.191652968799	-3.27928375747887
Chr3	1170000	1180000	10001	*	1.16028394468694	70.0673048151745	148.206350699707	223.830280303395	239.59777537129	0.0034	0	0.5519	0	Core	0	6.15111408188172	7.91047949282219	-3.27369190923451
Chr3	1180000	1190000	10001	*	967.676809868911	203.101203972451	180.067051945017	251.964633986013	71.1357155997371	0.0034	0	0.5395	0	Core	0	7.67314088248324	6.17264183369669	-3.27369190923451
Chr3	1190000	1200000	10001	*	1.93380657447824	112.671567653611	130.443922513658	237.57689145261	383.755587960611	0.0025	1	0.5646	0	Core	0	6.82872763191415	8.58779846932241	-3.28630418515664
Chr3	1200000	1210000	10001	*	500.855902789864	103.482412923753	166.213055894209	234.352377726251	237.164616766994	0.0027	0	0.5445	0	Core	0	6.7071163098511	7.89581528305002	-3.28349191323125
Chr3	1210000	1220000	10001	*	4.25437446385213	126.037610897043	142.029632057407	233.466107871638	82.5360205209863	0.0027	0	0.5488	0	Core	0	6.98911187591831	6.38432651309019	-3.28349191323125
Chr3	1220000	1230000	10001	*	0.773522629791296	60.7737278724763	129.048053893929	246.892153328758	94.947863288965	0.0031	0	0.5704	0	Core	0	5.94892149083451	6.58417877356713	-3.27788376218134
Chr3	1230000	1240000	10001	*	0.386761314895648	69.4407715381387	120.428565167104	343.420140259936	50.0847928434736	0.0029	0	0.5641	0	Core	0	6.13833880598934	5.67482198185306	-3.28068511265548
Chr3	1240000	1250000	10001	*	431.238866108647	106.092968244735	252.338149731477	236.10606063006	23.1286761711674	0.0029	0	0.5492	0	Core	0	6.74271994519909	4.59267685860995	-3.28068511265548
Chr3	1250000	1260000	10001	*	1.16028394468694	119.302378168907	177.484694998519	318.397159471174	8.42036910250539	0.0029	0	0.5533	0	Core	0	6.91052135214388	3.23578358764293	-3.28068511265548
Chr3	1260000	1270000	10001	*	0.773522629791296	145.146875846636	118.33476223751	382.114304976243	1569.55133293486	0.0027	0	0.564	0	Core	0	7.19127517903679	10.6170553824181	-3.28349191323125
Chr3	1270000	1280000	10001	*	1.93380657447824	125.045599875069	477.631344955708	215.401288281861	2.70654721151959	0.0033	0	0.5167	0	Core	0	6.97780194581951	1.8900758875895	-3.27508784068439
Chr3	1280000	1290000	10001	*	1.54704525958259	79.6741483963907	129.117847324915	304.952257208636	113.975710351769	0.0032	0	0.5753	0	Core	0	6.33403453846058	6.84518530088948	-3.2764851241262
Chr3	1290000	1300000	10001	*	2.32056788937389	128.387110685927	140.21500285176	334.519728102968	133.632351211189	0.003	0	0.5667	0	Core	0	7.01555009554656	7.07288131089614	-3.27928375747887
Chr3	1300000	1310000	10001	*	519.420445904855	190.257271793216	205.925518125494	286.434874288844	186.724418734129	0.0029	1	0.5748	0	Core	0	7.57937079133463	7.55247251439901	-3.28068511265548
Chr3	1310000	1320000	10001	*	417.315458772404	62.9665943421017	118.823316254415	318.623441136181	342.091164219643	0.0026	0	0.5695	0	Core	0	5.99924676938806	8.42244816177741	-3.2848973639424
Chr3	1320000	1330000	10001	*	1257.74779604065	77.3246486075063	140.738453584158	263.674710150158	493.029014268124	0.0033	0	0.5497	0	Core	0	6.2913944870503	8.9484519633894	-3.27508784068439
Chr3	1330000	1340000	10001	*	471.84880417269	83.9032480163826	105.597461082485	292.525622438633	187.079823923521	0.003	0	0.598	0	Core	0	6.40774784074455	7.55520128325738	-3.27928375747887
Chr3	1340000	1350000	10001	*	331.45444686557	111.783978844477	209.066222519883	245.572176949547	24.0581974357297	0.0027	0	0.5345	0	Core	0	6.81741833478794	4.64721073284854	-3.28349191323125
Chr3	1350000	1360000	10001	*	7.73522629791296	48.1908512253398	142.936946660231	296.353553938346	390.97304719133	0.0036	0	0.5684	0	Core	0	5.62031811534708	8.61461064508391	-3.2709040918629
Chr3	1360000	1370000	10001	*	244.819912328945	90.6906918509375	107.27250342616	303.764278467346	331.702397145123	0.0027	0	0.5652	0	Core	0	6.51870337830317	8.37808845075632	-3.28349191323125
Chr3	1370000	1380000	10001	*	1.16028394468694	153.187386235262	142.622876220792	212.987617188446	183.771821776108	0.0027	0	0.5272	0	Core	0	7.26854093583067	7.5296009482412	-3.28349191323125
Chr3	1380000	1390000	10001	*	1.16028394468694	69.0752937932011	126.814664102363	262.467874603451	109.218748586068	0.0033	0	0.5826	0	Core	0	6.1308339827089	6.78422584191876	-3.27508784068439
Chr3	1390000	1400000	10001	*	0	99.7754243679571	86.0204036907883	298.06952323132	1212.50581190005	0.003	0	0.5811	0	Core	0	6.65500004820319	10.2449653027344	-3.27928375747887
Chr3	1400000	1410000	10001	*	109.066690800573	77.7423374588635	123.115612260082	271.877420506685	1683.44502670446	0.0031	0	0.5847	0	Core	0	6.29906763428625	10.7180576303108	-3.27788376218134
Chr3	1410000	1420000	10001	*	1.54704525958259	32.6841526187029	92.9299533584459	279.231574619434	64.7930999121356	0.0031	0	0.5986	0	Core	0	5.07399810125806	6.03986438333832	-3.27788376218134
Chr3	1420000	1430000	10001	*	773.522629791296	118.88468931755	133.200763037622	395.747775292954	130.570398810278	0.0027	0	0.5722	0	Core	0	6.90550361119515	7.0396911325464	-3.28349191323125
Chr3	1430000	1440000	10001	*	671.030881343949	65.5249385566647	182.300441736583	360.975826103446	66.050687505367	0.0028	0	0.5728	0	Core	0	6.05582336764277	6.06718021979114	-3.28208783035557
Chr3	1440000	1450000	10001	*	472.235565487586	80.9272149504624	155.220590513844	282.097809042864	32.3692110953454	0.0032	0	0.5889	0	Core	0	6.35627086729197	5.06044567405708	-3.2764851241262
Chr3	1450000	1460000	10001	*	1.54704525958259	68.4487605161653	84.066187623168	365.63345704152	2.78856379368685	0.003	0	0.6206	0	Core	0	6.11787704088469	1.92165104089909	-3.27928375747887
Chr3	1460000	1470000	10001	*	1.16028394468694	72.4690157104786	261.481089190701	328.938113699446	65.2578605444168	0.003	2	0.5852	0	Core	0	6.19906404136118	6.05001971466922	-3.27928375747887
Chr3	1470000	1480000	10001	*	1.93380657447824	120.085544765202	190.850137032422	258.828511157911	73.2954855968083	0.0029	0	0.5887	0	Core	0	6.91988283564663	6.21520264609586	-3.28068511265548
Chr3	1480000	1490000	10001	*	20.1115883745737	113.924634207683	250.523520525829	283.078362924564	340.58752687991	0.0039	0	0.5689	0	Core	0	6.84454426399904	8.41611148546779	-3.26673244064524
Chr3	1490000	1500000	10001	*	762.306551659322	130.99766600691	170.819422339314	249.626390114267	475.313432519996	0.0028	0	0.562	0	Core	0	7.04436860973704	8.895767424508	-3.28208783035557
Chr3	1500000	1510000	10001	*	172.882307758355	129.953443878517	310.02242044177	276.704762693515	260.211276355994	0.0037	0	0.5707	0	Core	0	7.03291019067076	8.02907336840378	-3.26951220073622
Chr3	1510000	1520000	10001	*	753.411041416722	96.642757982778	634.492081097733	218.078954651118	49.9207596791391	0.0033	1	0.5209	0	Core	0	6.60944114043538	5.67018203763706	-3.27508784068439
Chr3	1520000	1530000	10001	*	683.40724342061	95.4419025351259	172.215290959043	339.083075013956	123.845039072563	0.0026	0	0.5886	0	Core	0	6.59158820653827	6.96399468426785	-3.2848973639424
Chr3	1530000	1540000	10001	*	1.54704525958259	114.551167484719	121.300983054434	275.875063255154	101.618545305236	0.0033	0	0.5726	0	Core	0	6.85238802609178	6.68114766927853	-3.27508784068439
Chr3	1540000	1550000	10001	*	1.16028394468694	96.7471801956173	149.811599612395	290.319376204808	319.399909820034	0.0031	0	0.5343	0	Core	0	6.61098317913367	8.32372993145952	-3.27788376218134
Chr3	1550000	1560000	10001	*	463.340055244986	102.647035221038	117.078480479754	300.879187238499	138.033907787499	0.0028	0	0.5572	0	Core	0	6.69553503913976	7.11929296215674	-3.28208783035557
Chr3	1560000	1570000	10001	*	0.386761314895648	116.744033954344	118.928006400895	302.783724585646	84.8324848216696	0.0029	0	0.5739	0	Core	0	6.87951015065279	6.4234518594121	-3.28068511265548
Chr3	1570000	1580000	10001	*	0.386761314895648	71.8946935398624	132.712209020717	359.429568059227	227.978759564261	0.0031	0	0.5705	0	Core	0	6.18774189047705	7.83906996760554	-3.27788376218134
Chr3	1580000	1590000	10001	*	0.773522629791296	43.805118286089	133.096072891143	283.700637503335	1424.54601566314	0.0033	0	0.5869	0	Core	0	5.48559164199573	10.4772988939117	-3.27508784068439
Chr3	1590000	1600000	10001	*	738.714111450688	87.9235032106959	131.490823978455	294.939293532048	287.222070749746	0.0033	0	0.5898	0	Core	0	6.47449288046709	8.17103700461439	-3.27508784068439
Chr3	1600000	1610000	10001	*	1.16028394468694	66.8824273235757	114.600813679736	307.72420760498	1471.26812863776	0.003	0	0.5715	0	Core	0	6.08496624823398	10.523824722789	-3.27928375747887
Chr3	1610000	1620000	10001	*	257.196274405606	109.173423523495	93.3138172288714	295.165575197055	168.926820403834	0.0036	0	0.6069	0	Core	0	6.78363244294911	7.40876976807577	-3.2709040918629
Chr3	1620000	1630000	10001	*	328.747117661301	79.3608817578728	121.998917364299	257.451964362448	39.2312651366728	0.0027	0	0.5894	0	Core	0	6.3284214889826	5.33024520142424	-3.28349191323125
Chr3	1630000	1640000	10001	*	1017.18225817555	47.4598957354647	130.862683099577	317.435462394891	489.939723006491	0.0033	0	0.5893	0	Core	0	5.5987193956302	8.93940209281184	-3.27508784068439
Chr3	1640000	1650000	10001	*	0.386761314895648	82.1280703981144	222.920218570692	277.760743796884	522.226917519669	0.0038	0	0.5585	0	Core	0	6.3772638184045	9.03129295227207	-3.26812165119157
Chr3	1650000	1660000	10001	*	383.280463061587	98.4179356010462	193.851254564839	283.549783059996	54.3223162554487	0.0027	0	0.5633	0	Core	0	6.63543424112649	5.78978965593639	-3.28349191323125
Chr3	1660000	1670000	10001	*	529.476240092142	180.70263931842	158.047224468795	291.865634249027	134.561872475752	0.003	0	0.5625	0	Core	0	7.50543556533982	7.08280765936362	-3.27928375747887
Chr3	1670000	1680000	10001	*	1.54704525958259	67.8222272391294	98.2342541134154	302.463158893552	110.312303014965	0.0035	0	0.6263	0	Core	0	6.10480267651257	6.79846924802281	-3.27229732716276
Chr3	1680000	1690000	10001	*	151.610435439094	76.9069597561491	98.2342541134154	300.03063099472	90.9837284842141	0.0034	2	0.6095	0	Core	0	6.28368031094292	6.52330677223846	-3.27369190923451
Chr3	1690000	1700000	10001	*	1.54704525958259	114.237900846201	102.212479679643	295.448427278315	263.929361414244	0.0034	0	0.5782	0	Core	0	6.84847147573955	8.049463932385	-3.27369190923451
Chr3	1700000	1710000	10001	*	0	133.712643540732	140.319692998239	307.573353161641	394.281049338743	0.0032	0	0.5666	0	Core	0	7.07374145198909	8.62673498054981	-3.2764851241262
Chr3	1710000	1720000	10001	*	1.93380657447824	145.303509165895	349.525502380096	268.690620391161	56.0720033416836	0.0026	0	0.5559	0	Core	0	7.19282056345836	5.8347113002775	-3.2848973639424
Chr3	1720000	1730000	10001	*	1507.59560546324	721.714124038865	497.278195778391	75.4083648637977	51.7524633475412	0.0117	3	0.3019	0	Core	0	9.4972812790103	5.72116655887409	-3.16229890906613
Chr3	1730000	1740000	10001	*	175.97639827752	1532.65702894892	649.0789081739	48.8014124199821	0.0546777214448402	0.0334	6	0.2757	0	Core	0	10.5827601743108	0.0768022210143885	-2.90616942836486
Chr3	1740000	1750000	10001	*	67.6832301067384	1341.19890170805	678.217665610739	46.1426028561423	0.0273388607224201	0.0082	6	0.2754	0	Core	0	10.3903827663677	0.0389121232814827	-3.20822759572263
Chr3	1750000	1760000	10001	*	553.842202930568	673.993172771302	499.267308561504	131.563931396528	13.6420915004876	0.0086	4	0.362	0	Core	0	9.39872909985109	3.87204974016685	-3.20290399174509
Chr3	1760000	1770000	10001	*	1.93380657447824	142.275264993555	187.46515562958	278.703584067749	75.099850404488	0.0038	2	0.5609	0	Core	0	7.16264575435532	6.2498217125989	-3.26812165119157
Chr3	1770000	1780000	10001	*	0.773522629791296	160.601363346853	139.202998102456	332.671761172073	52.4906125870466	0.0032	0	0.5639	0	Core	0	7.33629555918527	5.74121382074816	-3.2764851241262
Chr3	1780000	1790000	10001	*	493.507437806847	140.552298481706	107.028226417707	360.749544438438	75.0725115437656	0.0035	0	0.5886	0	Core	0	7.14519136523694	6.24930333148544	-3.27229732716276
Chr3	1790000	1800000	10001	*	1.16028394468694	142.170842780715	145.554200322222	253.925741749412	169.938358250563	0.0029	0	0.573	0	Core	0	7.16159390263728	7.41733236120883	-3.28068511265548
Chr3	1800000	1810000	10001	*	377.092282023257	59.2596057863063	132.677312305224	306.177949560761	82.1806153315948	0.0039	1	0.593	0	Core	0	5.91311932985092	6.37817545229958	-3.26673244064524
Chr3	1810000	1820000	10001	*	409.580232474491	79.5175150771317	599.700055750993	246.213308333735	17.9069537731852	0.0029	1	0.5365	0	Core	0	6.33123074353486	4.24084503457185	-3.28068511265548
Chr3	1820000	1830000	10001	*	3327.69435336216	78.3166596294797	333.507909968707	266.352376519415	37.0714951396017	0.0026	1	0.5485	0	Core	0	6.3095520155522	5.25063932326226	-3.2848973639424
Chr3	1830000	1840000	10001	*	528.315956147455	133.190532476535	141.680664902475	314.550371166044	106.457523653104	0.0026	0	0.5633	0	Core	0	7.06813907866772	6.74762268656582	-3.2848973639424
Chr3	1840000	1850000	10001	*	1.16028394468694	118.205944934095	117.985795082578	382.453727473754	784.242558683343	0.0031	0	0.5769	0	Core	0	6.89731237618778	9.61699455608048	-3.27788376218134
Chr3	1850000	1860000	10001	*	831.150065710747	85.5740034218115	85.5667463893764	307.969346075405	47.5422787962885	0.0029	0	0.6045	0	Core	0	6.43586197012898	5.60116993166104	-3.28068511265548
Chr3	1860000	1870000	10001	*	0.773522629791296	48.6607511831167	97.5712165190443	282.342947513289	42.429911841196	0.0028	0	0.5819	0	Core	0	5.63403417919633	5.44061711914133	-3.28208783035557
Chr3	1870000	1880000	10001	*	421.956594551152	98.2090911753675	107.621470581092	321.263393894604	102.985488341357	0.0032	0	0.5917	0	Core	0	6.63240042510291	6.70023839738395	-3.2764851241262
Chr3	1880000	1890000	10001	*	1.93380657447824	66.1514718337005	113.414325352966	341.383605274867	116.135480348841	0.003	0	0.5722	0	Core	0	6.06934711604284	6.8720343242835	-3.27928375747887
Chr3	1890000	1900000	10001	*	493.507437806847	101.602813092645	112.751287758595	344.513834974139	87.5116931724667	0.0029	1	0.5622	0	Core	0	6.68092647607225	6.46779615536621	-3.28068511265548
Chr3	1900000	1910000	10001	*	33.6482343959214	101.655024199065	127.826668851666	333.954023940449	86.0080558327336	0.0036	0	0.5548	0	Core	0	6.68166042812913	6.44307707713481	-3.2709040918629
Chr3	1910000	1920000	10001	*	1043.86878890335	130.214499410615	121.789537071339	285.661745266734	355.350511670016	0.0026	0	0.5747	0	Core	0	7.03578333863315	8.47715318565354	-3.2848973639424
Chr3	1920000	1930000	10001	*	357.367454963579	134.443599030607	317.699697850279	277.534462131876	4.83897834786836	0.0037	0	0.5697	0	Core	0	7.08154840417099	2.54571596133062	-3.26951220073622
Chr3	1930000	1940000	10001	*	692.689514978106	227.431579564009	359.575756442143	244.459625429926	472.442852144142	0.0046	5	0.5193	0	Core	0	7.83561829989335	8.88704648261938	-3.25704524330251
Chr3	1940000	1950000	10001	*	234.764118141658	98.2090911753675	309.429176278385	258.97936560125	243.917315365432	0.0029	0	0.5646	0	Core	0	6.63240042510291	7.93615096412073	-3.28068511265548
Chr3	1950000	1960000	10001	*	388.308360155231	96.32949134426	131.839791133387	298.710654615509	42.8399947520323	0.0031	0	0.5936	0	Core	0	6.60480511026865	5.45417572048467	-3.27788376218134
Chr3	1960000	1970000	10001	*	8.50874892770426	138.150587586402	135.154979105243	356.054199889529	303.734742626087	0.0033	0	0.5717	0	Core	0	7.12050319047586	8.25141017997637	-3.27508784068439
Chr3	1970000	1980000	10001	*	1.16028394468694	143.00622048343	131.735100986907	260.129630731705	417.491742092077	0.0024	0	0.5725	0	Core	0	7.16998732135042	8.70905534478367	-3.28771237954945
Chr3	1980000	1990000	10001	*	929.000678379346	79.4653039707121	87.1022018710781	356.846185717056	98.1738488542106	0.0029	0	0.5941	0	Core	0	6.33029493302542	6.6318878414857	-3.28068511265548
Chr3	1990000	2000000	10001	*	1.16028394468694	98.9922577716623	109.540789933219	370.969932974617	84.4224019108332	0.0031	0	0.576	0	Core	0	6.64374448870631	6.41654255920001	-3.27788376218134
Chr3	2000000	2010000	10001	*	1.16028394468694	112.82820097287	127.721978705187	275.535640757642	67.1715807949862	0.0031	0	0.5679	0	Core	0	6.83071421985666	6.09109853221607	-3.27788376218134
Chr3	2010000	2020000	10001	*	1.16028394468694	42.1865739870797	101.898409240204	374.175589895558	1747.28126649131	0.0032	0	0.5963	0	Core	0	5.43251096623901	10.7717215914279	-3.2764851241262
Chr3	2020000	2030000	10001	*	1494.05895944189	58.5286502964312	143.111430237697	314.078951030611	63.2894625724025	0.0026	0	0.559	0	Core	0	5.89551227914554	6.00651038546789	-3.2848973639424
Chr3	2030000	2040000	10001	*	1.54704525958259	126.664144174079	119.940011150199	356.506763219545	81.9619044458154	0.0036	0	0.5667	0	Core	0	6.9962095755367	6.37437710744493	-3.2709040918629
Chr3	2040000	2050000	10001	*	1.93380657447824	102.594824114618	105.318287358539	312.287554515967	39.0125542508935	0.0035	0	0.5878	0	Core	0	6.69480811354523	5.32238082273299	-3.27229732716276
Chr3	2050000	2060000	10001	*	0.773522629791296	79.1520373321942	123.185405691068	332.238054647475	84.2583687464987	0.0029	0	0.6162	0	Core	0	6.32466728665455	6.41376954728222	-3.28068511265548
Chr3	2060000	2070000	10001	*	237.084686031032	90.7951140637768	151.521538671563	303.405999164417	51.0416529687583	0.0036	1	0.5627	0	Core	0	6.52034546090607	5.7015948811544	-3.2709040918629
Chr3	2070000	2080000	10001	*	504.723515938821	41.3511962843653	131.421030547468	231.127863999892	86.5274941864596	0.0029	0	0.551	0	Core	0	5.40433081649078	6.45166436321399	-3.28068511265548
Chr3	2080000	2090000	10001	*	177.136682222207	75.5494709892381	96.0706577528358	260.86504614298	452.157417488106	0.003	0	0.5917	0	Core	0	6.25832050260798	8.82386848944803	-3.27928375747887
Chr3	2090000	2100000	10001	*	0.773522629791296	96.642757982778	136.306570716519	336.612833504289	4.78430062642352	0.003	1	0.5637	0	Core	0	6.60944114043538	2.53214253516931	-3.27928375747887
Chr3	2100000	2110000	10001	*	331.45444686557	104.474423945726	96.5243150542477	273.763101048416	109.46479833257	0.0041	0	0.58	0	Core	0	6.72074939799647	6.78744289095696	-3.26395802625003
Chr3	2110000	2120000	10001	*	0.773522629791296	53.9862840379214	114.565916964243	387.186785633498	34.5289810924166	0.0032	0	0.5737	0	Core	0	5.78099988773824	5.1509244102383	-3.2764851241262
Chr3	2120000	2130000	10001	*	293.165076690901	72.2079601783803	104.585456333182	295.995274635417	81.7978712814809	0.003	0	0.593	0	Core	0	6.19392862161384	6.3715217716563	-3.27928375747887
Chr3	2130000	2140000	10001	*	252.941899941754	101.916079731163	124.790654603756	382.170875392495	91.8859108880539	0.0032	0	0.573	0	Core	0	6.68532459801302	6.53738787735727	-3.2764851241262
Chr3	2140000	2150000	10001	*	7.34846498301731	71.5814269013445	101.305165076819	278.307591153986	194.351960875684	0.0031	0	0.6005	0	Core	0	6.18152851438384	7.6099319266448	-3.27788376218134
Chr3	2150000	2160000	10001	*	207.304064784067	56.0747282947075	132.921589313677	310.760153277166	217.398620464685	0.0029	0	0.5837	0	Core	0	5.83478018137744	7.77081993314309	-3.28068511265548
Chr3	2160000	2170000	10001	*	1.54704525958259	113.611367569165	106.434982254322	220.436055328281	1499.9739323963	0.0029	0	0.5607	0	Core	0	6.84060633266825	10.5516832063714	-3.28068511265548
Chr3	2170000	2180000	10001	*	1.16028394468694	144.102653718243	162.374417189955	257.451964362448	2672.72904080596	0.0033	0	0.5393	0	Core	0	7.18093009423203	11.3846375529009	-3.27508784068439
Chr3	2180000	2190000	10001	*	1.93380657447824	109.382267949173	137.842026198221	222.170881426673	156.67901080019	0.0031	0	0.5415	0	Core	0	6.78636462279251	7.30084682054491	-3.27788376218134
Chr3	2190000	2200000	10001	*	833.470633600121	57.4844281680381	135.259669251722	297.126682960455	100.907734926453	0.0037	1	0.56	0	Core	0	5.86998064445078	6.67111974781945	-3.26951220073622
Chr3	2200000	2210000	10001	*	473.009088117377	60.512672340378	89.4751785246171	295.41071366748	534.44738826259	0.0032	0	0.5743	0	Core	0	5.94281174825473	9.06460101606391	-3.2764851241262
Chr3	2210000	2220000	10001	*	505.883799883507	79.2042484386138	129.152744040409	288.999399825597	330.499487273337	0.0028	0	0.5828	0	Core	0	6.32560675350003	8.37286282871353	-3.28208783035557
Chr3	2220000	2230000	10001	*	1152.16195707414	55.9180949754485	125.977142930526	249.192683589669	165.591479395699	0.0028	0	0.5882	0	Core	0	5.83081547116732	7.38017080327573	-3.28208783035557
Chr3	2230000	2240000	10001	*	301.28706430371	51.1146731848404	97.85039024299	272.989972026306	128.21925678815	0.0031	0	0.6008	0	Core	0	5.70361772364079	7.01367727221055	-3.27788376218134
Chr3	2240000	2250000	10001	*	911.209657894147	151.621053042673	113.763292507899	334.010594356701	58.7785505532032	0.0029	0	0.5693	0	Core	0	7.25381017570392	5.90155601139054	-3.28068511265548
Chr3	2250000	2260000	10001	*	1.16028394468694	106.87613484103	112.716391043102	313.381249230171	293.701380740959	0.003	0	0.5786	0	Core	0	6.75323192619786	8.2031100095969	-3.27928375747887
Chr3	2260000	2270000	10001	*	0.773522629791296	138.4116431185	97.3618362260849	302.161450006875	337.306863593219	0.0024	0	0.5796	0	Core	0	7.12320724429435	8.40218863670105	-3.28771237954945
Chr3	2270000	2280000	10001	*	0.773522629791296	79.7263595028103	108.912649054341	277.873884629388	126.797636030584	0.0029	0	0.5869	0	Core	0	6.33496792718307	6.99771733968643	-3.28068511265548
Chr3	2280000	2290000	10001	*	1052.76429914595	79.935203928489	115.577921713546	332.879186031663	263.355245339073	0.0035	0	0.5582	0	Core	0	6.33869545496967	8.04633414274511	-3.27229732716276
Chr3	2290000	2300000	10001	*	392.562734619083	77.1680152882473	138.400373646112	270.519730516639	472.19680239764	0.0036	0	0.5543	0	Core	0	6.28850650262001	8.88629651454994	-3.2709040918629
Chr3	2300000	2310000	10001	*	207.690826098963	113.768000888424	144.018744840521	284.737761801287	352.534609015607	0.0032	0	0.5596	0	Core	0	6.84257664193866	8.4657076433134	-3.2764851241262
Chr3	2310000	2320000	10001	*	300.900302988814	213.021314192185	152.917407291292	210.951082203377	116.572902120399	0.0032	0	0.5328	0	Core	0	7.74161067027095	6.87741177986985	-3.2764851241262
Chr3	2320000	2330000	10001	*	0	130.788821581231	140.424383144719	264.900402502283	142.408125503086	0.0034	0	0.5397	0	Core	0	7.04208419492147	7.1639829592183	-3.27369190923451
Chr3	2330000	2340000	10001	*	0.773522629791296	154.231608363655	176.368000102736	245.892742641641	203.756528964197	0.0033	0	0.5229	0	Core	0	7.27827853973858	7.6777656448356	-3.27508784068439
Chr3	2340000	2350000	10001	*	220.840710805415	144.938031420957	151.905402541988	231.655854551576	602.90389551153	0.0033	0	0.5277	0	Core	0	7.18921208805815	9.23817516895987	-3.27508784068439
Chr3	2350000	2360000	10001	*	472.235565487586	154.805930534272	135.503946260175	263.467285290568	677.621001865905	0.0028	0	0.5436	0	Core	0	7.2836063383832	9.40646226883472	-3.28208783035557
Chr3	2360000	2370000	10001	*	905.021476855816	330.809570274922	193.292907116948	215.646426752286	156.815705103802	0.0033	0	0.5036	0	Core	0	8.37421168784985	7.30209697274295	-3.27508784068439
Chr3	2370000	2380000	10001	*	2.70732920426954	1398.78775208893	438.093366301889	85.2139036807956	122.724145782944	0.0047	6	0.3294	0	Core	0	10.4509923745305	6.95098327134949	-3.25566665261864
Chr3	2380000	2390000	10001	*	746.836099063496	2578.60212385383	419.633003805975	23.2504410795355	0	0.0061	8	0.2268	0	Core	0	11.332932847129	0	-3.23650343863468
Chr3	2390000	2400000	10001	*	1946.95645918469	3528.73983847868	443.362770341365	33.7348248915564	0	0.0102	2	0.2422	0	Core	0	11.7853461374026	0	-3.18180387097829
Chr3	2400000	2410000	10001	*	307.47524534204	2848.4291218306	424.797717698972	20.8933404023725	0	0.0077	6	0.2153	0	Core	0	11.4764571914475	0	-3.21490984500524
Chr3	2410000	2420000	10001	*	755.3448479912	2765.20461819767	371.545329856318	19.6865048556651	0	0.0094	4	0.2137	0	Core	0	11.4336921623149	0	-3.19231535675689
Chr3	2420000	2430000	10001	*	949.11226675392	3003.60053010981	353.294347653363	21.1007652619629	0	0.0076	3	0.2128	0	Core	0	11.5529574780814	0	-3.21625001699283
Chr3	2430000	2440000	10001	*	1660.36632484702	2949.40540164621	377.059010904246	23.2692978849528	0.0273388607224201	0.0079	5	0.2145	0	Core	0	11.526697486852	0.0389121232814827	-3.21223323006143
Chr3	2440000	2450000	10001	*	935.188859417677	3198.66122369363	380.967443039487	27.1537998009174	0	0.0083	4	0.2229	0	Core	0	11.643703447034	0	-3.20689485194112
Chr3	2450000	2460000	10001	*	20.4983496894693	2943.14006887585	405.430040600235	32.5845597611009	0	0.0075	2	0.2367	0	Core	0	11.5236305945983	0	-3.21759143507263
Chr3	2460000	2470000	10001	*	560.417145283794	3384.68939586685	421.587219873596	37.807894861694	0.0273388607224201	0.0079	4	0.2527	0	Core	0	11.7252339107023	0.0389121232814827	-3.21223323006143
Chr3	2470000	2480000	10001	*	520.580729849542	3412.41349337569	394.472471935364	28.0212128501134	0	0.0066	4	0.2333	0	Core	0	11.7369994745776	0	-3.22972065679027
Chr3	2480000	2490000	10001	*	374.384952818987	2763.37722947298	388.888997456448	17.4236882055887	0	0.0048	3	0.2038	0	Core	0	11.4327387853215	0	-3.254289378012
Chr3	2490000	2500000	10001	*	1894.74368167378	2577.66232393828	345.337896520909	21.0819084565456	0	0.0086	5	0.2088	0	Core	0	11.3324071491132	0	-3.20290399174509
Chr3	2500000	2510000	10001	*	1157.18985416778	3421.65485921197	420.470524977813	34.6588083570043	0	0.0076	4	0.2418	0	Core	0	11.7409001028619	0	-3.21625001699283
Chr3	2510000	2520000	10001	*	2645.44739388623	2843.57348893357	394.43757521987	26.8898045250751	0	0.0079	3	0.2388	0	Core	0	11.4739966378869	0	-3.21223323006143
Chr3	2520000	2530000	10001	*	3.09409051916518	3078.78452335411	414.991740645377	25.8338234217061	0	0.0099	5	0.2257	0	Core	0	11.5886137011787	0	-3.18573670860022
Chr3	2530000	2540000	10001	*	1218.29814192129	1970.91705623549	438.65171374978	18.1779604222808	0	0.0162	4	0.2116	0	Core	0	10.9453831542915	0	-3.10531802614492
Chr3	2540000	2550000	10001	*	58.0141972343472	338.69344734429	225.014021500285	205.199756551099	6181.83584769291	0.003	3	0.4667	0	Core	0	8.4080895788041	12.5940529876786	-3.27928375747887
Chr3	2550000	2560000	10001	*	0.773522629791296	227.379368457589	159.373299657538	234.672943418345	207.529291743891	0.0029	2	0.523	0	Core	0	7.83528851486974	7.70410624052132	-3.28068511265548
Chr3	2560000	2570000	10001	*	0	187.176816514457	133.584626908048	333.991737551284	982.093893731497	0.003	0	0.5374	0	Core	0	7.55594508798004	9.94118540242584	-3.27928375747887
Chr3	2570000	2580000	10001	*	0.773522629791296	99.2533133037606	148.34593756168	264.787261669779	453.086938752668	0.0025	0	0.5601	0	Core	0	6.64750610733187	8.82682472980111	-3.28630418515664
Chr3	2580000	2590000	10001	*	38.6761314895648	98.9400466652427	180.136845376004	210.215666792102	178.71413254246	0.0038	0	0.5281	0	Core	0	6.64299098660233	7.48956005520142	-3.26812165119157
Chr3	2590000	2600000	10001	*	197.24827059678	125.985399790623	119.4165604178	358.14730529085	997.37631687533	0.0029	0	0.5709	0	Core	0	6.98851882172871	9.96343990128682	-3.28068511265548
Chr3	2600000	2610000	10001	*	424.277162440526	142.431898312814	101.549442085271	274.498516459691	186.669741012684	0.003	0	0.5994	0	Core	0	7.16422209540525	7.55205224532403	-3.27928375747887
Chr3	2610000	2620000	10001	*	896.512727928112	102.960301859556	129.780884919287	263.278717236395	438.816053455565	0.0025	0	0.5633	0	Core	0	6.69988891771876	8.78075645385403	-3.28630418515664
Chr3	2620000	2630000	10001	*	0.386761314895648	78.577715161578	104.236489178249	296.18384268959	280.059289240471	0.0031	0	0.5659	0	Core	0	6.3142925717981	8.13473068773219	-3.27788376218134
Chr3	2630000	2640000	10001	*	189.126282983972	134.913498988384	128.036049144626	244.233343764918	88.7419419049756	0.0032	0	0.5605	0	Core	0	7.08654494210105	6.4877104973813	-3.2764851241262
Chr3	2640000	2650000	10001	*	1.54704525958259	117.161722805702	122.801541820643	370.951076169199	320.302092223874	0.0026	0	0.5582	0	Core	0	6.88461895573213	8.3277865650166	-3.2848973639424
Chr3	2650000	2660000	10001	*	1.93380657447824	90.6906918509375	121.196292907954	305.819670257832	454.481220649512	0.0031	0	0.6059	0	Core	0	6.51870337830317	8.83124776315588	-3.27788376218134
Chr3	2660000	2670000	10001	*	29.0070986171736	58.2153836579133	121.161396192461	280.117844474047	530.537931179284	0.0031	0	0.5716	0	Core	0	5.88790011945501	9.05402883763957	-3.27788376218134
Chr3	2670000	2680000	10001	*	595.225663624402	170.834740205105	206.902626159304	240.367698654371	278.227585572069	0.003	0	0.5237	0	Core	0	7.42487792854968	8.1252976657138	-3.27928375747887
Chr3	2680000	2690000	10001	*	322.172175308075	75.1317821378809	134.073180924953	270.708298570813	895.402366380703	0.0029	0	0.5654	0	Core	0	6.25042694494541	9.80800264714735	-3.28068511265548
Chr3	2690000	2700000	10001	*	2.32056788937389	99.8798465807965	154.313275911021	293.411892293246	258.734977876984	0.0036	0	0.5578	0	Core	0	6.65649417648834	8.02089650110213	-3.2709040918629
Chr3	2700000	2710000	10001	*	8.50874892770426	44.0139627117676	77.7149854034018	349.624029242229	107.332367196221	0.003	0	0.6162	0	Core	0	5.49230066989669	6.75932054091064	-3.27928375747887
Chr3	2710000	2720000	10001	*	0.386761314895648	39.3671742404185	156.965426288505	288.169700387236	37.2355283039362	0.0034	0	0.5491	0	Core	0	5.33511069453661	5.25684190296113	-3.27369190923451
Chr3	2720000	2730000	10001	*	97.0770900388076	100.767435389931	145.938064192648	362.918077061428	3848.79215136302	0.0029	0	0.5751	0	Core	0	6.66913217636163	11.910564842082	-3.28068511265548
Chr3	2730000	2740000	10001	*	2.32056788937389	118.362578253354	145.658890468702	355.903345446191	160.916534212165	0.003	0	0.5741	0	Core	0	6.8992067932918	7.33910650467974	-3.27928375747887
Chr3	2740000	2750000	10001	*	5.80141972343472	118.623633785452	98.792601561307	263.278717236395	131.03515944256	0.0036	0	0.5947	0	Core	0	6.90235863764415	7.04477834359456	-3.2709040918629
Chr3	2750000	2760000	10001	*	0.773522629791296	136.218776648875	146.217237916593	292.393624800712	22.062460602993	0.004	0	0.567	0	Core	0	7.10033409930834	4.52747454154375	-3.26534456652099
Chr3	2760000	2770000	10001	*	1552.84667930603	1060.56420470241	560.057386950694	26.2298163354695	0	0.0491	4	0.2387	0	Core	0	10.051975914506	0	-2.74564783726601
Chr3	2770000	2780000	10001	*	253.328661256649	500.495666138795	438.791300611753	178.404236053111	0.0546777214448402	0.0052	5	0.4304	0	Core	0	8.97009342308061	0.0768022210143885	-3.24879339025715
Chr3	2780000	2790000	10001	*	379.799611227526	230.616457055608	198.911278311356	212.214488166336	63.2894625724025	0.0037	2	0.5009	0	Core	0	7.85559395462607	6.00651038546789	-3.26951220073622
Chr3	2790000	2800000	10001	*	0.386761314895648	85.8872700603294	134.108077640446	267.295216790281	151.48462726293	0.0028	0	0.5771	0	Core	0	6.4410729167356	7.25251999448668	-3.28208783035557
Chr3	2800000	2810000	10001	*	1.16028394468694	78.421081842319	112.192940310704	262.82615390638	121.165830721766	0.0029	0	0.5917	0	Core	0	6.31145010770037	6.93269701550797	-3.28068511265548
Chr3	2810000	2820000	10001	*	0	89.3332030840265	131.002269961549	273.38596494007	209.087606805069	0.0031	0	0.5725	0	Core	0	6.49718446044639	7.71484724884317	-3.27788376218134
Chr3	2820000	2830000	10001	*	954.140163847563	124.210222172355	117.985795082578	347.191501343396	83.8756246963848	0.003	0	0.559	0	Core	0	6.96820853858962	6.40727838271966	-3.27928375747887
Chr3	2830000	2840000	10001	*	0.773522629791296	63.071016554941	91.1851175837849	343.816133173699	66.4881092769257	0.0029	0	0.6167	0	Core	0	6.00159997546504	6.07656143114913	-3.28068511265548
Chr3	2840000	2850000	10001	*	0.386761314895648	164.726040754006	104.306282609236	324.091914707199	165.181396484862	0.0033	0	0.6288	0	Core	0	7.37265650274379	7.37661507548551	-3.27508784068439
Chr3	2850000	2860000	10001	*	2.32056788937389	161.958852113764	317.560110988306	259.318788098761	416.124799055956	0.0029	4	0.5626	0	Core	0	7.34836391284695	8.70433527618431	-3.28068511265548
Chr3	2860000	2870000	10001	*	261.063887554562	64.1674497897537	143.914054694041	296.975828517117	59.6533940963206	0.0029	0	0.5925	0	Core	0	6.02607963368603	5.92251647409831	-3.28068511265548
Chr3	2870000	2880000	10001	*	414.221368253239	59.7295057440832	105.283390643046	260.148487537122	967.030181473444	0.0027	0	0.5956	0	Core	0	5.92432572253967	9.91890821866227	-3.28349191323125
Chr3	2880000	2890000	10001	*	1.54704525958259	42.604262838437	83.4729434597832	280.645835025732	87.8670983618582	0.0028	0	0.5882	0	Core	0	5.44639727748696	6.47357747776627	-3.28208783035557
Chr3	2890000	2900000	10001	*	480.74431441529	44.9537626273213	125.314105336154	255.000579658199	14.9270179544414	0.003	0	0.5732	0	Core	0	5.52211108701189	3.99340426852605	-3.27928375747887
Chr3	2900000	2910000	10001	*	23.2056788937389	155.380252704888	286.013480182434	303.820848883598	6.58866543410324	0.0033	0	0.5608	0	Core	0	7.2889145341116	2.92384619118858	-3.27508784068439
Chr3	2910000	2920000	10001	*	0	97.4259245790727	120.358771736117	306.423088031186	104.243075934588	0.0029	0	0.597	0	Core	0	6.62096645451326	6.71758150958963	-3.28068511265548
Chr3	2920000	2930000	10001	*	949.499028068816	122.226200128408	388.574927017009	233.277539817465	8.93980745623137	0.0031	0	0.5371	0	Core	0	6.94516522159232	3.31321790564766	-3.27788376218134
Chr3	2930000	2940000	10001	*	462.953293930091	123.47926668248	124.581274310797	255.000579658199	348.570474210856	0.003	0	0.5678	0	Core	0	6.95976165620226	8.44943952533277	-3.27928375747887
Chr3	2940000	2950000	10001	*	210.011393988337	119.928911445943	158.012327753302	291.281073281091	1357.04636853949	0.0032	0	0.5512	0	Core	0	6.9180153922879	10.4073170238323	-3.2764851241262
Chr3	2950000	2960000	10001	*	1.16028394468694	118.101522721255	233.459026649645	265.088970556456	65.8046377588652	0.0036	2	0.5477	0	Core	0	6.89604804805115	6.06187635686006	-3.2709040918629
Chr3	2960000	2970000	10001	*	198.408554541467	87.7146587850173	140.040519274293	271.839706895851	107.824466689225	0.0034	0	0.5791	0	Core	0	6.47110060312445	6.76585913977239	-3.27369190923451
Chr3	2970000	2980000	10001	*	432.012388738439	119.928911445943	122.312987803738	258.4890886604	45.3004922170501	0.0028	2	0.5958	0	Core	0	6.9180153922879	5.53295562563686	-3.28208783035557
Chr3	2980000	2990000	10001	*	0.773522629791296	104.996535009922	144.856266012358	269.331751775349	270.053266216066	0.0034	0	0.5804	0	Core	0	6.727873294132	8.08243258140723	-3.27369190923451
Chr3	2990000	3000000	10001	*	283.882805133406	96.2250691314207	121.510363347393	301.350607373931	198.671500869827	0.0031	0	0.5578	0	Core	0	6.60325645036862	7.64148462126545	-3.27788376218134
Chr3	3000000	3010000	10001	*	6.57494235322601	73.0433378810947	129.397021048861	273.857385075502	91.3391336736055	0.0033	0	0.557	0	Core	0	6.2102980283989	6.52887029196323	-3.27508784068439
Chr3	3010000	3020000	10001	*	0.386761314895648	54.038495144341	110.378311105056	352.245125195234	67.8003745916018	0.003	0	0.5789	0	Core	0	5.78236911947904	6.10434451475623	-3.27928375747887
Chr3	3020000	3030000	10001	*	0	112.045034376576	99.3858457246917	257.433107557031	449.778936605255	0.0038	0	0.5944	0	Core	0	6.82075381134115	8.81627629453708	-3.26812165119157
Chr3	3030000	3040000	10001	*	1.16028394468694	61.9223722137086	504.466919169994	219.568642279085	165.400107370642	0.0028	0	0.5309	0	Core	0	5.97550115719277	7.37851255416144	-3.28208783035557
Chr3	3040000	3050000	10001	*	331.841208180466	173.706351058186	212.939757939631	254.64230035527	1167.72475803673	0.0029	0	0.5758	0	Core	0	7.44878824493039	10.1907194908615	-3.28068511265548
Chr3	3050000	3060000	10001	*	242.112583124676	78.7343484808369	370.70780868448	251.380073018076	6.75269859843776	0.0027	0	0.5659	0	Core	0	6.31712944655296	2.95469857837565	-3.28349191323125
Chr3	3060000	3070000	10001	*	457.151874206656	110.583123396825	196.852372097256	292.412481606129	41.8557957660252	0.0043	1	0.5598	0	Core	0	6.80197503026729	5.42141842075317	-3.26118893702968
Chr3	3070000	3080000	10001	*	1.16028394468694	117.736044976318	130.757992953097	302.61401333689	220.815978054987	0.0029	0	0.5782	0	Core	0	6.8916141535213	7.79321948056939	-3.28068511265548
Chr3	3080000	3090000	10001	*	0.773522629791296	133.817065753571	71.2939897526493	316.964042259459	69.0306233241107	0.0032	0	0.6309	0	Core	0	7.0748593207135	6.12991402347033	-3.2764851241262
Chr3	3090000	3100000	10001	*	0.386761314895648	60.0427723826011	107.656367296585	267.427214428202	227.705370957037	0.0035	1	0.5901	0	Core	0	5.93174858149954	7.83734643642547	-3.27229732716276
Chr3	3100000	3110000	10001	*	0.773522629791296	139.455865246894	102.526550119082	252.322913288941	520.559247015601	0.0032	0	0.5866	0	Core	0	7.13397306048986	9.02668733613546	-3.2764851241262
Chr3	3110000	3120000	10001	*	1.16028394468694	69.8584603894959	130.757992953097	293.147897017404	54.2402996732815	0.0029	0	0.5587	0	Core	0	6.14686821384952	5.78764924098558	-3.28068511265548
Chr3	3120000	3130000	10001	*	10.0557941872868	101.811657518324	118.125381944551	336.348838228447	283.09390278066	0.0027	0	0.5874	0	Core	0	6.68386004662512	8.15022405853379	-3.28349191323125
Chr3	3130000	3140000	10001	*	845.460234361886	66.7780051107364	126.012039646019	262.524445019703	32.4238888167902	0.0027	0	0.5877	0	Core	0	6.08274526993292	5.0628076933465	-3.28349191323125
Chr3	3140000	3150000	10001	*	1.54704525958259	97.686980111171	150.788707646205	267.144362346942	209.169623387236	0.0024	0	0.5576	0	Core	0	6.62478785567773	7.71541035595646	-3.28771237954945
Chr3	3150000	3160000	10001	*	1022.59691658409	96.1728580250011	125.000034896716	360.014129027163	175.460808116492	0.003	0	0.5598	0	Core	0	6.60248149656923	7.46320398678683	-3.27928375747887
Chr3	3160000	3170000	10001	*	1034.58651734586	103.325779604494	276.521573568278	294.260448537025	45.2184756348828	0.0031	1	0.5501	0	Core	0	6.70495189137133	5.53039777290448	-3.27788376218134
Chr3	3170000	3180000	10001	*	3.48085183406083	70.9548936243086	108.947545769834	292.563336049468	6295.56550829818	0.0026	0	0.5756	0	Core	0	6.16902090231774	12.6203494029184	-3.2848973639424
Chr3	3180000	3190000	10001	*	946.018176234755	157.781963600192	226.165613111561	228.337056798131	197.823996187432	0.0034	0	0.5243	0	Core	0	7.31090323259315	7.63534807691345	-3.27369190923451
Chr3	3190000	3200000	10001	*	460.632726040717	87.29696993366	129.397021048861	297.86209837173	91.8038943058867	0.0029	0	0.5838	0	Core	0	6.46429202498434	6.53611344095044	-3.28068511265548
Chr3	3200000	3210000	10001	*	0.386761314895648	70.6938380922103	97.9201836739765	310.364160363402	31.7677561594522	0.0033	0	0.5933	0	Core	0	6.16377722307778	5.03420497959395	-3.27508784068439
Chr3	3210000	3220000	10001	*	1.54704525958259	78.1600263102207	117.113377195248	305.480247760321	129.0120837491	0.0034	0	0.5696	0	Core	0	6.30670018677782	7.02250190806484	-3.27369190923451
Chr3	3220000	3230000	10001	*	995.136863226502	138.150587586402	182.37023516757	289.88566968021	47.7336508213455	0.0032	0	0.5469	0	Core	0	7.12050319047586	5.60684639918568	-3.2764851241262
Chr3	3230000	3240000	10001	*	0.773522629791296	104.996535009922	136.830021448917	295.297572834977	155.55811751057	0.0029	0	0.5696	0	Core	0	6.727873294132	7.29055450367213	-3.28068511265548
Chr3	3240000	3250000	10001	*	170.174978554085	107.450457011646	120.672842175556	247.740709572537	297.501482381376	0.0027	0	0.5572	0	Core	0	6.76089232233352	8.2215942858174	-3.28349191323125
Chr3	3250000	3260000	10001	*	263.384455443936	77.3246486075063	329.52968440248	267.747780120296	22.6912543996087	0.0038	2	0.5398	0	Core	0	6.2913944870503	4.56628268300471	-3.26812165119157
Chr3	3260000	3270000	10001	*	1357.14545396883	148.853864402431	597.047905373508	226.790798753912	5.05768923364772	0.0033	0	0.5204	0	Core	0	7.22741247804621	2.59876756813406	-3.27508784068439
Chr3	3270000	3280000	10001	*	458.312158151343	145.199086953055	509.422252770031	238.689442972231	50.2761648685306	0.0032	0	0.5293	0	Core	0	7.19179049113065	5.68021645645281	-3.2764851241262
Chr3	3280000	3290000	10001	*	0.386761314895648	94.1366248746346	155.744041246243	322.168520554634	824.485361666745	0.003	0	0.5692	0	Core	0	6.57192893915978	9.68909882182659	-3.27928375747887
Chr3	3290000	3300000	10001	*	1.16028394468694	102.38597968894	328.308299360218	275.724208811815	40.1334475405127	0.0031	0	0.5365	0	Core	0	6.69189674288711	5.36224008919493	-3.27788376218134
Chr3	3300000	3310000	10001	*	1.54704525958259	73.6176600517109	184.743211821109	288.49026607933	248.346210802464	0.0024	0	0.5577	0	Core	0	6.22144521402458	7.96200646898376	-3.28771237954945
Chr3	3310000	3320000	10001	*	155.47804858805	123.009366724703	110.831968406468	301.21860973601	108.179871878616	0.004	0	0.583	0	Core	0	6.95430528471686	6.77056309898586	-3.26534456652099
Chr3	3320000	3330000	10001	*	473.009088117377	64.8984052796288	174.553370897088	245.911599447058	92.1046217738333	0.0028	0	0.5474	0	Core	0	6.04217164778368	6.54078088076691	-3.28208783035557
Chr3	3330000	3340000	10001	*	701.585025220705	98.8878355588231	169.702727443531	262.75072668471	116.026124905951	0.0033	0	0.5411	0	Core	0	6.64223709074769	6.87068682270271	-3.27508784068439
Chr3	3340000	3350000	10001	*	3.09409051916518	124.88896655581	360.692451337926	233.296396622882	287.194731889023	0.0025	0	0.5551	0	Core	0	6.97600803444601	8.17090015350721	-3.28630418515664
Chr3	3350000	3360000	10001	*	316.757516899536	116.848456167184	460.706437941496	245.723031392885	360.8182838145	0.0033	4	0.5325	0	Core	0	6.88078904896071	8.49912150348848	-3.27508784068439
Chr3	3360000	3370000	10001	*	430.465343478856	91.4738584472323	161.955656604036	254.925152436529	183.935854940442	0.0029	0	0.5625	0	Core	0	6.53097368085375	7.53088114804855	-3.28068511265548
Chr3	3370000	3380000	10001	*	620.751910407515	120.39881140372	119.974907865692	340.59161944734	163.130981930681	0.0026	0	0.5685	0	Core	0	6.92361048624185	7.35870378242806	-3.2848973639424
Chr3	3380000	3390000	10001	*	517.099878015481	99.5143688358589	162.374417189955	320.961685007927	193.750505939791	0.0026	0	0.5443	0	Core	0	6.6512579435816	7.60548326602511	-3.2848973639424
Chr3	3390000	3400000	10001	*	239.405253920406	96.4339135570993	124.685964457277	292.186199941122	408.661290078736	0.0035	0	0.5743	0	Core	0	6.60635210954332	8.67828776516579	-3.27229732716276
Chr3	3400000	3410000	10001	*	449.803409223639	54.2473395700196	147.822486829282	274.196807573014	366.368072541152	0.0029	0	0.5714	0	Core	0	5.78783308823213	8.52108243901096	-3.28068511265548
Chr3	3410000	3420000	10001	*	910.04937394946	75.0795710314612	123.185405691068	272.782547166716	364.837096340696	0.0026	0	0.558	0	Core	0	6.24943720658888	8.51505756336664	-3.2848973639424
Chr3	3420000	3430000	10001	*	368.583533095552	93.8755693425363	318.118458436197	263.467285290568	6.8073763198826	0.0038	0	0.5465	0	Core	0	6.56796473296687	2.96483781005368	-3.26812165119157
Chr3	3430000	3440000	10001	*	0.386761314895648	71.6858491141838	101.689028947244	338.875650154366	27.5575716081995	0.0034	0	0.5684	0	Core	0	6.18360261446613	4.83580139996303	-3.27369190923451
Chr3	3440000	3450000	10001	*	636.609124318236	85.3651589961329	115.333644705093	403.384781486962	63.125429408068	0.0028	0	0.5878	0	Core	0	6.43237751976508	6.00282467646968	-3.28208783035557
Chr3	3450000	3460000	10001	*	1411.29203805422	82.7023925687306	128.873570316463	340.572762641923	4.40155657630963	0.0032	0	0.5703	0	Core	0	6.38719695658424	2.4333752112248	-3.2764851241262
Chr3	3460000	3470000	10001	*	0.773522629791296	48.2952734381792	135.678429837641	355.092502813247	24.3315860429539	0.0028	0	0.575	0	Core	0	5.6233774186873	4.66286550374472	-3.28208783035557
Chr3	3470000	3480000	10001	*	452.897499742804	75.3406265635595	257.677347201939	261.317609472995	46.8314684175056	0.003	0	0.5425	0	Core	0	6.25437912236866	5.57988817737057	-3.27928375747887
Chr3	3480000	3490000	10001	*	1030.7189041969	82.9112369944092	241.904031799004	319.019434049945	125.922792487467	0.0032	0	0.5684	0	Core	0	6.39079211735905	6.98780735789757	-3.2764851241262
Chr3	3490000	3500000	10001	*	1.93380657447824	94.6065248324115	143.983848125027	246.119024306648	73.5688742040325	0.0027	0	0.559	0	Core	0	6.57903717566808	6.2205016556348	-3.28349191323125
Chr3	3500000	3510000	10001	*	1.16028394468694	57.3277948487791	160.420201122334	247.36357346419	250.287269913756	0.0031	0	0.5608	0	Core	0	5.86611162727892	7.97319377664199	-3.27788376218134
Chr3	3510000	3520000	10001	*	367.03648783597	83.3289258457664	151.032984654658	320.829687370006	102.848794037744	0.0026	0	0.5693	0	Core	0	6.39795567286697	6.69834065250646	-3.2848973639424
Chr3	3520000	3530000	10001	*	27.0732920426954	69.1797160060404	112.855977905075	411.22921254056	80.8410111561962	0.0035	0	0.5816	0	Core	0	6.13298220453246	6.3547520647631	-3.27229732716276
Chr3	3530000	3540000	10001	*	103.265271077138	45.4758736915179	144.542195572919	276.987614774775	101.509189862346	0.003	0	0.5808	0	Core	0	5.53841008124938	6.67960944169592	-3.27928375747887
Chr3	3540000	3550000	10001	*	0.773522629791296	125.306655407168	150.684017499726	321.037112229596	69.5774005385592	0.0032	0	0.5607	0	Core	0	6.98078685003987	6.14113438956731	-3.2764851241262
Chr3	3550000	3560000	10001	*	890.711308204677	51.8978397811352	130.967373246056	313.286965203084	609.437883224189	0.0029	0	0.5769	0	Core	0	5.72513690228	9.25370068707782	-3.28068511265548
Chr3	3560000	3570000	10001	*	442.454944240621	99.1488910909213	154.243482480034	293.713601179923	214.555378949553	0.0033	0	0.5569	0	Core	0	6.64600263662194	7.7519147536227	-3.27508784068439
Chr3	3570000	3580000	10001	*	0.773522629791296	92.8313472141433	134.247664502419	283.625210281666	79.720117866577	0.0031	0	0.5848	0	Core	0	6.55199807429373	6.33485637593968	-3.27788376218134
Chr3	3580000	3590000	10001	*	1.54704525958259	133.764854647151	118.509245814977	360.80611485469	83.4108640641037	0.003	0	0.5719	0	Core	0	7.07430049462353	6.39935678721716	-3.27928375747887
Chr3	3590000	3600000	10001	*	0.386761314895648	122.696100086185	140.180106136266	253.963455360247	145.005317271716	0.0033	0	0.5629	0	Core	0	6.95065620524653	7.18987710039952	-3.27508784068439
Chr3	3600000	3610000	10001	*	147.356060975242	117.944889401996	181.881681150665	320.150842374983	42.5392672840857	0.0032	1	0.5598	0	Core	0	6.89414947589012	5.44424522371549	-3.2764851241262
Chr3	3610000	3620000	10001	*	0.773522629791296	139.403654140474	347.466596165996	292.469052022381	97.0802944253138	0.0026	3	0.5765	0	Core	0	7.13343667343527	6.61589140472053	-3.2848973639424
Chr3	3620000	3630000	10001	*	3.09409051916518	108.285834714361	802.764043206042	234.616373002093	17.4968708623489	0.0035	2	0.5238	0	Core	0	6.77196260531588	4.20920932383422	-3.27229732716276
Chr3	3630000	3640000	10001	*	1270.5109194322	112.253878802254	414.852153783404	302.293447644796	33.2713934991853	0.0033	0	0.5516	0	Core	0	6.8234166513747	5.09893294894146	-3.27508784068439
Chr3	3640000	3650000	10001	*	286.976895652571	96.9560246212959	308.731241968521	275.290502287217	79.5834235629649	0.0031	0	0.5465	0	Core	0	6.61406232065207	6.33241119414889	-3.27788376218134
Chr3	3650000	3660000	10001	*	0.386761314895648	109.121212417075	235.517932863745	293.826742012427	15.7745226368364	0.0034	0	0.5638	0	Core	0	6.78294858875176	4.06819980621488	-3.27369190923451
Chr3	3660000	3670000	10001	*	1.54704525958259	76.1237931598543	351.723995456168	266.239235686912	182.377539879264	0.003	0	0.5556	0	Core	0	6.26910410390254	7.51867313792748	-3.27928375747887
Chr3	3670000	3680000	10001	*	3.86761314895648	102.38597968894	292.608959410653	272.518551890874	18.9184916199147	0.0033	0	0.5302	0	Core	0	6.69189674288711	4.31603649455925	-3.27508784068439
Chr3	3680000	3690000	10001	*	0	65.9426274080219	108.703268761382	321.1502530621	204.193950735756	0.0029	0	0.5899	0	Core	0	6.06485327086155	7.68084438966624	-3.28068511265548
Chr3	3690000	3700000	10001	*	0	198.558837713941	118.54414253047	356.26162474912	1493.00252291208	0.0031	0	0.6073	0	Core	0	7.64067036160183	10.5449668690608	-3.27788376218134
Chr3	3700000	3710000	10001	*	1.16028394468694	76.019370947015	107.132916564187	321.772527640871	118.240572624467	0.0032	0	0.6127	0	Core	0	6.26714943490972	6.89773139843261	-3.2764851241262
Chr3	3710000	3720000	10001	*	1.16028394468694	91.5782806600716	143.809364547561	267.106648736108	63.5355123189043	0.0027	0	0.5686	0	Core	0	6.53260186440611	6.01202135383456	-3.28349191323125
Chr3	3720000	3730000	10001	*	410.353755104282	100.558590964252	199.574315905728	290.074237734383	50.2488260078081	0.0031	0	0.5793	0	Core	0	6.6661684738922	5.67944705107398	-3.27788376218134
Chr3	3730000	3740000	10001	*	478.036985211021	118.93690042397	205.12289366915	315.266929771901	24.4956192072884	0.0035	1	0.5767	0	Core	0	6.90613178404299	4.67217747174131	-3.27229732716276
Chr3	3740000	3750000	10001	*	2.70732920426954	550.252850556724	937.255984716914	167.750140992334	23.7027922463382	0.0052	2	0.4236	0	Core	0	9.10657040071412	4.62660221897531	-3.24879339025715
Chr3	3750000	3760000	10001	*	785.512230553061	347.621546542051	964.894183387544	200.428984780521	271.857631023745	0.0035	2	0.4591	0	Core	0	8.4455179277086	8.09200458197773	-3.27229732716276
Chr3	3760000	3770000	10001	*	417.315458772404	157.103219216736	621.99905695116	263.825564593497	13.1773308682065	0.003	0	0.5248	0	Core	0	7.30472293318725	3.82551404032345	-3.27928375747887
Chr3	3770000	3780000	10001	*	1.54704525958259	171.148006843623	153.754928463129	381.133751094543	29.8266970481603	0.0028	0	0.5602	0	Core	0	7.42750566703186	4.94610841386494	-3.28208783035557
Chr3	3780000	3790000	10001	*	8.8955102425999	159.243874579942	497.068815485432	253.058328700216	118.84202756036	0.0031	1	0.5402	0	Core	0	7.32412539977293	6.90499012728326	-3.27788376218134
Chr3	3790000	3800000	10001	*	1.93380657447824	107.032768160289	281.30242359085	287.245716921788	102.630083151965	0.0029	0	0.5646	0	Core	0	6.75532516227506	6.69529905876497	-3.28068511265548
Chr3	3800000	3810000	10001	*	0.773522629791296	71.1115269435676	334.868881872943	355.205643645751	81.4424660920895	0.0028	0	0.5691	0	Core	0	6.1721579859085	6.36531575558228	-3.28208783035557
Chr3	3810000	3820000	10001	*	1.54704525958259	160.496941134014	769.507473341003	261.770172803011	20.2854346560357	0.0037	0	0.5384	0	Core	0	7.33536302929094	4.41179464564615	-3.26951220073622
Chr3	3820000	3830000	10001	*	1.16028394468694	129.587966133579	176.402896818229	314.833223247303	70.7529715496232	0.0028	0	0.5543	0	Core	0	7.02887814638868	6.16496667512353	-3.28208783035557
Chr3	3830000	3840000	10001	*	802.529728408469	155.641308236986	403.929481834026	319.905703904558	15.8292003582812	0.0038	0	0.5585	0	Core	0	7.29132090898072	4.07289472333482	-3.26812165119157
Chr3	3840000	3850000	10001	*	401.071483546787	95.5985358543849	239.356571567999	404.101340092819	13.9701578291567	0.0032	0	0.5692	0	Core	0	6.59392941716139	3.90401752658037	-3.2764851241262
Chr3	3850000	3860000	10001	*	513.619026181421	174.437306548061	418.376722048219	317.925739335741	25.3978016111283	0.0028	0	0.5849	0	Core	0	7.45481175767643	4.72234588292624	-3.28208783035557
Chr3	3860000	3870000	10001	*	0.773522629791296	175.324895357195	516.820356454594	302.274590839379	7.95560847022425	0.0027	0	0.5487	0	Core	0	7.46209237329682	3.16279145646059	-3.28349191323125
Chr3	3870000	3880000	10001	*	1.54704525958259	110.217645651888	275.300188526016	308.308768572916	243.835298783265	0.0032	0	0.5842	0	Core	0	6.79724189217835	7.93566776131976	-3.2764851241262
Chr3	3880000	3890000	10001	*	0.773522629791296	59.4162391055653	326.458773439077	339.68649278731	362.267243432789	0.0031	1	0.5741	0	Core	0	5.91686447437485	8.50488747056343	-3.27788376218134
Chr3	3890000	3900000	10001	*	543.01288611349	121.91293348989	217.964884970655	283.097219729981	21.4063279456549	0.0033	1	0.5857	0	Core	0	6.94149292078223	4.48583432746293	-3.27508784068439
Chr3	3900000	3910000	10001	*	1731.91716810271	148.175120018976	381.665377349352	341.892739021134	37.2355283039362	0.003	1	0.5597	0	Core	0	7.22086312738958	5.25684190296113	-3.27928375747887
Chr3	3910000	3920000	10001	*	888.003979000408	186.445861024581	1027.53378769787	246.307592360821	49.9754374005839	0.0031	2	0.5234	0	Core	0	7.55033015973129	5.67173034439252	-3.27788376218134
Chr3	3920000	3930000	10001	*	892.645114779155	132.198521454562	138.505063792592	325.20446622682	115.752736298727	0.0027	0	0.5671	0	Core	0	7.05743425790454	6.86731255211517	-3.28349191323125
Chr3	3930000	3940000	10001	*	155.091287273155	69.1797160060404	141.261904316556	335.34942754133	94.756491263908	0.0029	0	0.582	0	Core	0	6.13298220453246	6.58129838450273	-3.28068511265548
Chr3	3940000	3950000	10001	*	535.664421130472	151.621053042673	149.672012750422	357.355319463323	121.685269075492	0.0028	0	0.5688	0	Core	0	7.25381017570392	6.93881822355491	-3.28208783035557
Chr3	3950000	3960000	10001	*	8.50874892770426	136.479832180973	261.515985906194	337.763098634745	15.4464563081674	0.0032	0	0.5809	0	Core	0	7.10307618552814	4.03970485712257	-3.2764851241262
Chr3	3960000	3970000	10001	*	1.93380657447824	85.6784256346508	598.199496984784	289.602817598951	9.67795669573671	0.0033	0	0.5393	0	Core	0	6.43760104446905	3.41656369819023	-3.27508784068439
Chr3	3970000	3980000	10001	*	873.693810349269	114.44674527188	548.646160984411	289.206824685187	67.7730357308794	0.0028	1	0.555	0	Core	0	6.8510836903332	6.10377112431379	-3.28208783035557
Chr3	3980000	3990000	10001	*	0.773522629791296	80.6661594183641	322.236270864397	331.5026392362	107.633094664168	0.0029	0	0.5717	0	Core	0	6.3516664773808	6.76331987150256	-3.28068511265548
Chr3	3990000	4000000	10001	*	1.16028394468694	81.9714370788554	119.695734141746	380.888612624118	127.836512738036	0.0033	0	0.5995	0	Core	0	6.37454286897667	7.00939770621637	-3.27508784068439
Chr3	4000000	4010000	10001	*	1.16028394468694	101.968290837583	135.085185674256	310.401873974237	20.3401123774806	0.0036	0	0.599	0	Core	0	6.68605631655695	4.41549586833213	-3.2709040918629
Chr3	4010000	4020000	10001	*	875.627616923747	124.784544342971	130.199645505205	368.537405075784	19.1372025056941	0.0029	0	0.595	0	Core	0	6.97481085309206	4.33179137051169	-3.28068511265548
Chr3	4020000	4030000	10001	*	442.841705555517	120.816500255077	497.208402347404	310.779010082583	31.2209789450038	0.0025	0	0.5514	0	Core	0	6.9285657517866	5.00992842188179	-3.28630418515664
Chr3	4030000	4040000	10001	*	418.088981402195	36.2867189616589	164.991670851946	386.903933552238	101.235801255122	0.0027	0	0.5851	0	Core	0	5.22058994788519	6.67575668202516	-3.28349191323125
Chr3	4040000	4050000	10001	*	572.406746045559	89.3854141904462	130.304335651685	298.446659339666	216.633132364457	0.0027	1	0.5827	0	Core	0	6.49801807357981	7.76575439828942	-3.28349191323125
Chr3	4050000	4060000	10001	*	280.78871461424	105.30980164844	148.171453984214	387.997628266442	273.525301527813	0.003	0	0.5664	0	Core	0	6.73213080769449	8.10079531061371	-3.27928375747887
Chr3	4060000	4070000	10001	*	2.32056788937389	61.1914167238335	160.210820829375	361.805525541807	30.6742017305553	0.0031	0	0.56	0	Core	0	5.95864357710117	4.98523635517274	-3.27788376218134
Chr3	4070000	4080000	10001	*	0.386761314895648	85.4173701025525	158.74515877866	382.114304976243	62.6880076365093	0.0027	0	0.5726	0	Core	0	6.43324942165234	5.99294983546718	-3.28349191323125
Chr3	4080000	4090000	10001	*	0	130.579977155552	190.60586002397	270.331162462466	403.84965059159	0.0029	0	0.5577	0	Core	0	7.03979615714447	8.66124242217282	-3.28068511265548
Chr3	4090000	4100000	10001	*	8.50874892770426	129.48354392074	305.067086841733	248.193272902552	326.453335886418	0.0032	0	0.5374	0	Core	0	7.02772406093045	8.35514551815938	-3.2764851241262
Chr3	4100000	4110000	10001	*	1.16028394468694	102.38597968894	172.9481219844	354.243946569468	616.819375619242	0.0036	0	0.5625	0	Core	0	6.69189674288711	9.27104130624281	-3.2709040918629
Chr3	4110000	4120000	10001	*	1.93380657447824	135.748876691098	178.566493178809	286.472587899678	285.034961891952	0.0029	0	0.5567	0	Core	0	7.09538517197838	8.1600476873568	-3.28068511265548
Chr3	4120000	4130000	10001	*	0.773522629791296	130.94545490049	140.703556868665	336.028272536353	135.21800513309	0.0034	0	0.5727	0	Core	0	7.04379784505839	7.08977359943463	-3.27369190923451
Chr3	4130000	4140000	10001	*	0.386761314895648	54.8216617406358	195.979954209926	326.071879276016	80.3762505239151	0.0031	0	0.5716	0	Core	0	5.80275316714678	6.34653590349791	-3.27788376218134
Chr3	4140000	4150000	10001	*	348.085183406083	128.491532898766	291.178194075431	265.503820275637	65.9413320624773	0.003	0	0.5483	0	Core	0	7.01671395684239	6.06482535431948	-3.27928375747887
Chr3	4150000	4160000	10001	*	1.54704525958259	430.271728004362	1174.97241065673	232.560981211607	5.87785505532032	0.0042	2	0.4907	0	Core	0	8.75245333314879	2.78195871266988	-3.26257281727094
Chr3	4160000	4168633	8634	*	3.09409051916518	429.958461365844	883.724423150314	208.593981526214	158.866119657983	0.0042	1	0.491718	0	Core	0	8.75140500927583	7.32072041139162	-3.26257281727094
Chr4	0	10000	10001	*	563.897997117855	564.036582651513	842.965059454232	222.453733507932	17.7702594695731	0.0046	1	0.474	0	Core	0	9.14220046597754	4.23037668820367	-3.25704524330251
Chr4	10000	20000	10001	*	0.386761314895648	92.1526028306878	320.526331805229	242.045954336511	227.349965767646	0.003	0	0.5353	0	Core	0	6.54152417579301	7.835102763214	-3.27928375747887
Chr4	20000	30000	10001	*	4.25437446385213	172.975395568311	166.282849325195	266.974651098186	234.321375251863	0.0029	0	0.5397	0	Core	0	7.44273947744919	7.87848856247992	-3.28068511265548
Chr4	30000	40000	10001	*	0	107.607090330905	181.602507426719	293.657030763671	176.937106595503	0.0033	0	0.555	0	Core	0	6.76297448123491	7.47522358806418	-3.27508784068439
Chr4	40000	50000	10001	*	0.386761314895648	101.811657518324	188.826127533816	301.897454731033	62.7700242186765	0.0035	0	0.5739	0	Core	0	6.68386004662512	5.99480652399395	-3.27229732716276
Chr4	50000	60000	10001	*	157.411855162529	143.110642696269	98.792601561307	390.373585749022	166.274950913759	0.0029	0	0.5895	0	Core	0	7.17103307350498	7.38607761065503	-3.28068511265548
Chr4	60000	70000	10001	*	1.93380657447824	147.026475677743	220.896209072085	348.49262091719	73.9516182541464	0.0033	1	0.5568	0	Core	0	7.20971142585143	6.22788772212025	-3.27508784068439
Chr4	70000	80000	10001	*	1.16028394468694	81.7625926531768	140.249899567253	292.186199941122	123.106889833058	0.0024	0	0.5617	0	Core	0	6.37090693521933	6.95543939913559	-3.28771237954945
Chr4	80000	90000	10001	*	146.582538345451	85.8872700603294	152.219472981427	296.032988246251	135.081310829478	0.0028	0	0.5567	0	Core	0	6.4410729167356	7.08832513299388	-3.28208783035557
Chr4	90000	100000	10001	*	368.970294410448	92.4658694692057	141.227007601063	428.671757551566	35.7045521034806	0.0027	0	0.5686	0	Core	0	6.54636773329089	5.19788709228451	-3.28349191323125
Chr4	100000	110000	10001	*	0.386761314895648	64.271872002593	134.596631657351	387.469637714757	2.18710885779361	0.0035	0	0.5721	0	Core	0	6.02838951139367	1.67224829615277	-3.27229732716276
Chr4	110000	120000	10001	*	1.93380657447824	151.412208616994	129.013157178436	255.283431739458	115.424669970058	0.0039	0	0.5856	0	Core	0	7.25183466088508	6.8632529823196	-3.26673244064524
Chr4	120000	130000	10001	*	1.54704525958259	85.8350589539098	151.626228818043	309.477890508789	318.935149187753	0.0031	0	0.5638	0	Core	0	6.44020573164769	8.32163569042836	-3.27788376218134
Chr4	130000	140000	10001	*	1.16028394468694	85.9394811667491	158.954539071619	414.698864737344	62.3326024471178	0.0028	0	0.5719	0	Core	0	6.44193958088303	5.98487645836764	-3.28208783035557
Chr4	140000	150000	10001	*	294.325360635588	106.458445989673	155.464867522297	365.991736344448	135.300021715257	0.0029	0	0.5656	0	Core	0	6.74763506954877	7.09064198176738	-3.28068511265548
Chr4	150000	160000	10001	*	1.16028394468694	62.1312166393872	204.983306807177	271.70770925793	750.014305058873	0.0034	0	0.5614	0	Core	0	5.9802816492941	9.55269657772858	-3.27369190923451
Chr4	160000	170000	10001	*	1.16028394468694	88.0279254235352	195.491400193021	315.738349907334	114.358454401883	0.003	0	0.5656	0	Core	0	6.47618603266114	6.84997993004796	-3.27928375747887
Chr4	170000	180000	10001	*	1.54704525958259	115.177700761755	232.86578248626	268.106059423225	50.5495534757548	0.0029	0	0.5643	0	Core	0	6.86018937308087	5.68788802585409	-3.28068511265548
Chr4	180000	190000	10001	*	88.5683411111034	29.1860084885861	133.061176175649	304.461980267786	306.714678444831	0.0028	1	0.5876	0	Core	0	4.91580809604388	8.26544945377274	-3.28208783035557
Chr4	190000	200000	10001	*	446.709318704473	109.434479055593	107.028226417707	322.715367911736	28.1316876833703	0.0032	0	0.5748	0	Core	0	6.78704686004794	4.86451737830519	-3.2764851241262
Chr4	200000	210000	10001	*	1.54704525958259	112.514934334353	157.244600012451	401.64995538857	744.573871775111	0.0035	0	0.5677	0	Core	0	6.8267383046719	9.54220749220124	-3.27229732716276
Chr4	210000	220000	10001	*	887.230456370616	84.8430479319364	123.255199122054	312.174413683463	223.741236152286	0.0028	0	0.5869	0	Core	0	6.42362939603101	7.81212104831243	-3.28208783035557
Chr4	220000	230000	10001	*	1.16028394468694	87.4013921464993	113.2398417755	377.211535567744	282.137042655375	0.003	0	0.6002	0	Core	0	6.46599718426692	8.14535669832328	-3.27928375747887
Chr4	230000	240000	10001	*	0.773522629791296	55.1349283791537	124.127617009385	263.787850982662	157.280465736083	0.0031	0	0.5722	0	Core	0	5.81082682149591	7.30633940529621	-3.27788376218134
Chr4	240000	250000	10001	*	0.773522629791296	32.9974192572208	100.258263612022	346.512656348374	124.665204894236	0.003	0	0.5941	0	Core	0	5.08735333048208	6.97344143081725	-3.27928375747887
Chr4	250000	260000	10001	*	0.386761314895648	65.0550385988878	141.366594463036	275.290502287217	11.8103878320855	0.0034	0	0.5726	0	Core	0	6.04559670759913	3.67924224854948	-3.27369190923451
Chr4	260000	270000	10001	*	1.16028394468694	157.312063642415	196.119541071899	356.695331273718	92.733415570449	0.0029	0	0.572	0	Core	0	7.30662738519901	6.55049154921466	-3.28068511265548
Chr4	270000	280000	10001	*	1.16028394468694	131.676410390365	411.432275665069	316.945185454041	40.4068361477369	0.0028	0	0.5582	0	Core	0	7.05176807489034	5.3717970670144	-3.28208783035557
Chr4	280000	290000	10001	*	1120.0607679378	172.557706716954	502.512703102374	326.977005936047	80.4035893846375	0.0032	4	0.5211	0	Core	0	7.43927161829751	6.34702050452935	-3.2764851241262
Chr4	290000	300000	10001	*	514.392548811212	190.413905112475	752.652359757778	258.564515882069	61.6491309290573	0.0035	1	0.5219	0	Core	0	7.58055182685123	5.96922259145707	-3.27229732716276
Chr4	300000	310000	10001	*	0.773522629791296	102.855879646717	427.868628662375	256.452553675331	119.388804774809	0.0034	0	0.5323	0	Core	0	6.69843908431109	6.91155742865959	-3.27369190923451
Chr4	310000	320000	10001	*	125.31066602619	96.642757982778	327.191604464435	310.251019530898	210.017128069631	0.0032	0	0.5631	0	Core	0	6.60944114043538	7.72121629571298	-3.2764851241262
Chr4	320000	330000	10001	*	2.32056788937389	94.3976804067329	339.579938464528	331.785491317459	2599.9803324236	0.0031	0	0.5683	0	Core	0	6.57588228243484	11.3448397748995	-3.27788376218134
Chr4	330000	340000	10001	*	330.680924235779	111.940612163736	426.961314059552	277.628746158963	30.264118819719	0.003	0	0.5432	0	Core	0	6.81942054596213	4.96643595029932	-3.27928375747887
Chr4	340000	350000	10001	*	449.803409223639	157.103219216736	451.633291913259	259.224504071675	78.7905966020147	0.0027	1	0.5363	0	Core	0	7.30472293318725	6.31814682836498	-3.28349191323125
Chr4	350000	360000	10001	*	929.774201009138	74.9751488186219	577.750021705757	280.381839749889	4.4835731584769	0.0028	0	0.5402	0	Core	0	6.24745569056027	2.45511627605605	-3.28208783035557
Chr4	360000	370000	10001	*	1397.75539203287	134.182543498509	571.398819485991	287.358857754292	4.8936560693132	0.0032	0	0.5363	0	Core	0	7.07876505416014	2.55916287288578	-3.2764851241262
Chr4	370000	380000	10001	*	2.70732920426954	76.3326375855329	164.223943111095	344.362980530801	165.536801674254	0.0025	0	0.5573	0	Core	0	6.27300551479758	7.3796972122733	-3.28630418515664
Chr4	380000	390000	10001	*	421.956594551152	86.2005366988473	119.311870271321	335.896274898432	643.529442545047	0.0027	1	0.597	0	Core	0	6.44626510936643	9.33210245316155	-3.28349191323125
Chr4	390000	400000	10001	*	543.786408743281	57.2755837423595	119.556147279773	359.146715977967	84.7504682395023	0.0028	0	0.6259	0	Core	0	5.86481964568705	6.42207264401495	-3.28208783035557
Chr4	400000	410000	10001	*	4.64113577874777	136.94973213875	151.067881370151	312.608120208061	67.4723082629328	0.0032	1	0.5736	0	Core	0	7.10799884514317	6.09744874268115	-3.2764851241262
Chr4	410000	420000	10001	*	336.869105274109	56.8578948910023	177.589385144999	314.852080052721	91.694538862997	0.0035	0	0.5511	0	Core	0	5.85444192791013	6.53441243926829	-3.27229732716276
Chr4	420000	430000	10001	*	498.53533490049	125.619922045685	238.763327404614	281.060684744912	206.435737314994	0.0033	0	0.5705	0	Core	0	6.98436060224513	7.69652065483047	-3.27508784068439
Chr4	430000	440000	10001	*	0.386761314895648	135.43561005258	345.966037399787	290.45137384273	616.737359037075	0.0029	0	0.5468	0	Core	0	7.09207643048027	9.27084977328731	-3.28068511265548
Chr4	440000	450000	10001	*	1.16028394468694	79.621937289971	161.153032147692	320.980541813344	159.330880290264	0.003	0	0.5895	0	Core	0	6.33310054546725	7.32490851015818	-3.27928375747887
Chr4	450000	460000	10001	*	445.935796074682	79.2564595450335	162.234830327982	327.768991763574	52.0531908154879	0.0034	0	0.572	0	Core	0	6.32654560897332	5.72936761766258	-3.27369190923451
Chr4	460000	470000	10001	*	491.960392547264	221.061824580811	546.273184330872	266.408946935667	57.0015246062459	0.003	0	0.5366	0	Core	0	7.79481758526302	5.85801891776485	-3.27928375747887
Chr4	470000	480000	10001	*	0.386761314895648	65.7337829823433	344.91913593499	276.157915336413	45.6558974064416	0.0026	0	0.5533	0	Core	0	6.0603453840698	5.54398754726729	-3.2848973639424
Chr4	480000	490000	10001	*	175.202875647729	88.81109201983	116.938893617782	366.934576615314	76.2207436941072	0.0031	0	0.583	0	Core	0	6.48882172931684	6.27091654347734	-3.27788376218134
Chr4	490000	500000	10001	*	0.386761314895648	118.310367146934	279.871658255628	318.302875444087	81.4424660920895	0.0029	1	0.5698	0	Core	0	6.89857559728099	6.36531575558228	-3.28068511265548
Chr4	500000	510000	10001	*	0.773522629791296	96.9038135148762	155.60445438427	325.939881638095	99.5954696117764	0.0033	0	0.5965	0	Core	0	6.61329315116013	6.65242152358817	-3.27508784068439
Chr4	510000	520000	10001	*	912.756703153729	109.90437901337	175.251305206953	302.067165979789	422.549431325725	0.0025	0	0.5594	0	Core	0	6.79317252061382	8.7263865422528	-3.28630418515664
Chr4	520000	530000	10001	*	410.740516419178	156.006785981924	847.327148890885	228.714192906477	8.03762505239151	0.0031	1	0.51	0	Core	0	7.2946831048846	3.17594370457738	-3.27788376218134
Chr4	530000	540000	10001	*	388.308360155231	56.9623171038416	239.216984706026	357.279892241654	829.953133811229	0.0025	0	0.5761	0	Core	0	5.85704336416804	9.69862330031449	-3.28630418515664
Chr4	540000	550000	10001	*	1784.51670692852	159.60935232488	305.416053996665	270.086023992041	2721.96632896703	0.0034	0	0.553	0	Core	0	7.32741209358811	11.4109634274064	-3.27369190923451
Chr4	550000	560000	10001	*	1.54704525958259	86.9837032951421	130.723096237604	369.367104514146	617.47550827658	0.0037	0	0.5911	0	Core	0	6.45916442144905	9.2725726551663	-3.26951220073622
Chr4	560000	570000	10001	*	458.698919466238	107.398245905227	229.236524074965	344.098985254959	345.781910417169	0.0033	0	0.594	0	Core	0	6.76019760103933	8.43788483333991	-3.27508784068439
Chr4	570000	580000	10001	*	451.350454483221	114.968856336076	404.73210629037	305.913954284919	75.6739664796588	0.0036	1	0.5508	0	Core	0	6.85759360855786	6.26066490982315	-3.2709040918629
Chr4	580000	590000	10001	*	1.16028394468694	189.265260771243	727.177757447727	246.967580550427	35.7865686856479	0.0031	2	0.5154	0	Core	0	7.57186836364028	5.20110720824454	-3.27788376218134
Chr4	590000	600000	10001	*	2.70732920426954	172.766551142632	305.939504729063	310.835580498835	19.6839797201425	0.0028	0	0.5708	0	Core	0	7.44100658985068	4.37044189031423	-3.28208783035557
Chr4	600000	610000	10001	*	76.5787403493383	136.114354436036	293.306893720518	301.70888667686	15.2824231438328	0.0031	2	0.5649	0	Core	0	7.09923580385054	4.02524351177973	-3.27788376218134
Chr4	610000	620000	10001	*	534.504137185785	108.755734672137	216.743499928392	302.651726947725	131.910002985677	0.0027	0	0.5476	0	Core	0	6.7781525114662	7.05430587764508	-3.28349191323125
Chr4	620000	630000	10001	*	0	88.7066698069907	135.364359398202	275.516783952225	252.829783960941	0.0036	0	0.5783	0	Core	0	6.48714335026309	7.98771755230159	-3.2709040918629
Chr4	630000	640000	10001	*	0.773522629791296	62.2878499586462	109.785066941671	346.173233850862	103.860331884474	0.0036	0	0.5974	0	Core	0	5.98385665162004	6.71232520689962	-3.2709040918629
Chr4	640000	650000	10001	*	1.16028394468694	86.8270699758832	123.255199122054	343.099574567842	67.1442419342637	0.003	0	0.5942	0	Core	0	6.4565937692812	6.09051985193484	-3.27928375747887
Chr4	650000	660000	10001	*	695.396844182375	87.6624476785976	118.823316254415	306.347660809517	85.2699065932283	0.0039	0	0.6017	0	Core	0	6.47025128600582	6.43078548882074	-3.26673244064524
Chr4	660000	670000	10001	*	461.019487355612	66.6213717914774	142.518186074312	284.247484860437	31.4396898307831	0.003	0	0.58	0	Core	0	6.07940737844618	5.01968812030783	-3.27928375747887
Chr4	670000	680000	10001	*	768.494732697652	92.8835583205629	155.464867522297	313.550960478927	901.006832828799	0.0038	0	0.5617	0	Core	0	6.55280061798134	9.8169945519149	-3.26812165119157
Chr4	680000	690000	10001	*	346.151376831605	44.4316515631248	121.300983054434	309.949310644222	1883.53814833185	0.0032	1	0.6062	0	Core	0	5.50562584709295	10.8799952841494	-3.2764851241262
Chr4	690000	700000	10001	*	1.93380657447824	89.5942586161248	125.453692198127	334.953434627566	285.5817391064	0.003	0	0.5829	0	Core	0	6.5013477176919	8.16280287425278	-3.27928375747887
Chr4	700000	710000	10001	*	1.16028394468694	95.4941136415456	209.380292959322	282.305233902454	27.1201498366407	0.0024	1	0.537	0	Core	0	6.59236903230261	4.81353237663788	-3.28771237954945
Chr4	710000	720000	10001	*	1.54704525958259	39.5760186660971	352.17765275758	238.218022836798	1025.69937658376	0.0034	0	0.5428	0	Core	0	5.34255540915732	10.0037980988385	-3.27369190923451
Chr4	720000	730000	10001	*	949.11226675392	97.7914023240103	136.027396992573	319.717135850385	125.540048437353	0.0029	0	0.5863	0	Core	0	6.62631358645196	6.98345024297906	-3.28068511265548
Chr4	730000	740000	10001	*	1.54704525958259	192.450138262841	132.677312305224	288.923972603928	297.064060609817	0.0031	0	0.5602	0	Core	0	7.5958179496804	8.21947862110591	-3.27788376218134
Chr4	740000	750000	10001	*	666.776506880097	140.395665162447	133.340349899595	286.962864840528	1244.10953489517	0.0034	0	0.5697	0	Core	0	7.14359408117732	10.2820569494446	-3.27369190923451
Chr4	750000	760000	10001	*	720.536329650592	96.32949134426	160.80406499276	281.965811404943	212.778353002596	0.0033	0	0.5697	0	Core	0	6.60480511026865	7.73997196426946	-3.27508784068439
Chr4	760000	770000	10001	*	1.54704525958259	105.41422386128	150.858501077192	307.535639550807	101.89193391246	0.0034	0	0.5648	0	Core	0	6.73354719139033	6.6849860781231	-3.27369190923451
Chr4	770000	780000	10001	*	0.773522629791296	114.237900846201	643.809504134423	243.573355575312	14.2162075756585	0.0035	3	0.5142	0	Core	0	6.84847147573955	3.92753692721388	-3.27229732716276
Chr4	780000	790000	10001	*	1.93380657447824	116.587400635085	471.69890332186	306.121379144509	50.112131704196	0.0035	1	0.5608	0	Core	0	6.87758967499091	5.67559385713019	-3.27229732716276
Chr4	790000	800000	10001	*	0.386761314895648	167.388807181408	346.943145433597	347.58749425716	3.28066328669041	0.0032	1	0.545	0	Core	0	7.39565243530173	2.09783435884089	-3.2764851241262
Chr4	800000	810000	10001	*	903.861192911129	83.2245036329271	251.779802283585	312.457265764723	23.620775664171	0.0033	0	0.5642	0	Core	0	6.39616811590819	4.62180430874975	-3.27508784068439
Chr4	810000	820000	10001	*	282.722521188719	143.998231505403	201.633222119828	255.5474270153	84.5590962144454	0.0033	0	0.5501	0	Core	0	7.1798914940567	6.41884933786456	-3.27508784068439
Chr4	820000	830000	10001	*	2.70732920426954	173.393084419668	148.555317854639	317.171467119049	81.0323831812532	0.0031	0	0.5755	0	Core	0	7.44619902076532	6.35812163672003	-3.27788376218134
Chr4	830000	840000	10001	*	0.773522629791296	250.300044175817	344.884239219497	284.040060000846	96.0140788571394	0.0035	0	0.5697	0	Core	0	7.97326711460343	6.60012222387254	-3.27229732716276
Chr4	840000	850000	10001	*	30.1673825618605	1060.77304912809	834.345570727407	22.1190327544973	0.1366943036121	0.027	2	0.2025	0	Core	0	10.052259711927	0.184844315829825	-2.97709959788992
Chr4	850000	860000	10001	*	478.810507840812	582.101625472713	728.817903075908	166.24159655895	15.2004065616656	0.0042	2	0.3802	0	Core	0	9.18760353424416	4.01795811399348	-3.26257281727094
Chr4	860000	870000	10001	*	1.93380657447824	114.760011910398	492.253068747367	283.493212643744	9.67795669573671	0.0033	0	0.5461	0	Core	0	6.85499316519403	3.41656369819023	-3.27508784068439
Chr4	870000	880000	10001	*	1.16028394468694	389.390431677773	538.840183930816	289.791385653124	3.80010164041639	0.004	3	0.4842	0	Core	0	8.60877388319757	2.263064954703	-3.26534456652099
Chr4	880000	890000	10001	*	3.09409051916518	698.323548362861	829.355340411876	152.947548739751	1.69500936479005	0.0057	1	0.3619	0	Core	0	9.44981627573532	1.43029028615503	-3.24195271816677
Chr4	890000	900000	10001	*	1.16028394468694	145.146875846636	283.221742942977	315.191502550232	38.5477936186123	0.0028	0	0.5633	0	Core	0	7.19127517903679	5.30552530351012	-3.28208783035557
Chr4	900000	910000	10001	*	460.632726040717	153.187386235262	168.446445685775	342.986433735338	127.508446409367	0.0036	1	0.5517	0	Core	0	7.26854093583067	7.00571937559419	-3.2709040918629
Chr4	910000	920000	10001	*	3.86761314895648	152.143164106869	155.150797082858	328.221555093589	190.79790898177	0.0028	0	0.5735	0	Core	0	7.25873716017731	7.58344318167365	-3.28208783035557
Chr4	920000	930000	10001	*	2.32056788937389	96.2772802378404	342.790436289904	287.038292062198	254.661487629343	0.0028	0	0.543	0	Core	0	6.6040309881196	7.99809104182555	-3.28208783035557
Chr4	930000	940000	10001	*	2.70732920426954	207.225881379603	582.670458590301	320.056558347896	11.6736935284734	0.0024	1	0.552	0	Core	0	7.70200558894708	3.66376512912672	-3.28771237954945
Chr4	940000	950000	10001	*	2.32056788937389	246.85411115212	1065.57120758549	291.677066194854	219.585729322478	0.0031	2	0.5247	0	Core	0	7.95334737874066	7.78519564932755	-3.27788376218134
Chr4	950000	960000	10001	*	252.168377311962	167.07554054289	488.030566172687	243.629925991564	3.47203531174735	0.0031	2	0.5546	0	Core	0	7.39296597916149	2.16093157992566	-3.27788376218134
Chr4	960000	970000	10001	*	88.5683411111034	162.272118752282	451.144737896353	357.694741960835	15.9658946618933	0.0035	5	0.5957	0	Core	0	7.35113463914299	4.08456560452625	-3.27229732716276
Chr4	970000	980000	10001	*	92.0491929451642	241.580789403735	925.356204733725	264.636407226441	17.3328376980143	0.0035	3	0.5244	0	Core	0	7.92232149402809	4.19635820951536	-3.27229732716276
Chr4	980000	990000	10001	*	300.126780359023	204.876381590719	908.187020711061	320.641119315833	11.0995774533026	0.0035	2	0.5366	0	Core	0	7.68563452136517	3.59688476084432	-3.27229732716276
Chr4	990000	1000000	10001	*	163.600036200859	152.143164106869	909.129232029378	212.478483442179	24.6049746501781	0.0033	0	0.5232	0	Core	0	7.25873716017731	4.67835222565625	-3.27508784068439
Chr4	1000000	1010000	10001	*	335.322060014527	254.633566008648	727.387137740686	251.229218574738	52.7093234728259	0.0034	0	0.5251	0	Core	0	7.99793347181401	5.74710064418669	-3.27369190923451
Chr4	1010000	1020000	10001	*	604.121173867002	199.446426523075	438.895990758233	293.072469795735	84.9418402645592	0.0031	1	0.5438	0	Core	0	7.64707288771543	6.42528876462347	-3.27788376218134
Chr4	1020000	1030000	10001	*	267.252068592893	250.822155240014	805.206813290568	255.641711042387	81.2784329277549	0.0029	1	0.5166	0	Core	0	7.97626140630583	6.36244241149102	-3.28068511265548
Chr4	1030000	1040000	10001	*	508.204367772881	172.766551142632	849.735022259917	275.950490476823	9.59594011356945	0.0032	4	0.5508	0	Core	0	7.44100658985068	3.40543968986641	-3.2764851241262
Chr4	1040000	1050000	10001	*	268.799113852475	229.624446033635	1032.07036071199	247.816136794206	34.0095427386906	0.0035	2	0.5236	3	LS	1	7.84940163555811	5.12967631366802	-3.27229732716276
Chr4	1050000	1060000	10001	*	1.16028394468694	235.158823314118	643.460536979491	244.139059737832	51.998513094043	0.0029	1	0.5236	3	LS	1	7.88361362792559	5.72787997943222	-3.28068511265548
Chr4	1060000	1070000	10001	*	542.626124798594	297.446673272764	1171.69211940037	221.473179626232	23.429403639114	0.003	1	0.4981	3	LS	1	8.22132936221	4.61054674042482	-3.27928375747887
Chr4	1070000	1080000	10001	*	3.09409051916518	274.525997554536	583.08921917622	217.739532153606	353.737518887394	0.003	2	0.5132	3	LS	1	8.10604464205015	8.47060811505836	-3.27928375747887
Chr4	1080000	1090000	10001	*	737.940588820896	188.11661643001	369.137456487285	286.453731094261	445.54141319328	0.0032	0	0.5564	3	LS	1	7.56313231873132	8.80265016990952	-3.2764851241262
Chr4	1090000	1100000	10001	*	1.93380657447824	132.616210305919	236.98359491446	295.354143251228	1501.04014796448	0.0029	0	0.5446	3	LS	1	7.06195123582979	10.5527076597614	-3.28068511265548
Chr4	1100000	1110000	10001	*	87.7948184813121	245.131144640271	915.724711257597	248.853261092158	7.49084783794311	0.0029	2	0.5186	3	LS	1	7.9432834130936	3.08590861862227	-3.28068511265548
Chr4	1110000	1120000	10001	*	321.785413993179	214.535436278355	785.559962467885	319.434283769125	11.9197432749752	0.003	2	0.5554	3	LS	1	7.75178127273263	3.6915054977675	-3.27928375747887
Chr4	1120000	1130000	10001	*	43.7040285832082	272.803031042688	1253.62960737845	232.127274687009	16.7313827621211	0.0032	2	0.4989	3	LS	1	8.09699460732032	4.14823314247578	-3.2764851241262
Chr4	1130000	1140000	10001	*	995.523624541398	183.260983532982	959.031535184683	283.6629238925	23.8394865499503	0.0026	3	0.5431	3	LS	1	7.52560680864069	4.63456344721	-3.2848973639424
Chr4	1140000	1150000	10001	*	882.976081906764	336.500580874664	1471.07104161671	215.231577033105	7.38149239505343	0.0038	2	0.4952	3	LS	1	8.39874617497309	3.06720715075578	-3.26812165119157
Chr4	1150000	1160000	10001	*	415.381652197926	283.088619007359	1534.47837366789	203.747782533967	1.83170366840215	0.0032	1	0.4839	3	LS	1	8.15019722605217	1.50167029843814	-3.2764851241262
Chr4	1160000	1170000	10001	*	322.945697937866	348.456924244765	1328.62264897338	227.50735735977	5.35841670159434	0.0028	2	0.506	3	LS	1	8.44897082274751	2.66866756721892	-3.28208783035557
Chr4	1170000	1180000	10001	*	100.944703187764	461.859447388252	1559.18524823709	213.044187604698	813.057717884774	0.0035	4	0.4761	3	LS	1	8.85443035876725	9.66898727708456	-3.27229732716276
Chr4	1180000	1190000	10001	*	178.296966166894	166.135740627336	612.262873328552	333.652315053772	14.7356459293844	0.0034	8	0.5886	3	LS	1	7.38487646483915	3.97596449563957	-3.27369190923451
Chr4	1190000	1200000	10001	*	140.39435730712	178.614195061633	453.796888273838	293.619317152837	13.9974966898791	0.0025	3	0.5278	3	LS	1	7.48875756176782	3.90664980797594	-3.28630418515664
Chr4	1200000	1210000	10001	*	1.93380657447824	337.492591896638	957.356492841009	261.129041418822	4.23752341197511	0.0031	2	0.533	3	LS	1	8.40298044971699	2.38888478774085	-3.27788376218134
Chr4	1210000	1220000	10001	*	1.93380657447824	130.371132729874	398.869458087509	242.498517666526	472.032769233305	0.0033	1	0.5237	3	LS	1	7.03750448489613	8.88579631915933	-3.27508784068439
Chr4	1220000	1230000	10001	*	1.54704525958259	164.360563009068	792.295028558076	248.608122621733	72.0925757250218	0.0031	0	0.5216	3	LS	1	7.36947139565488	6.191652968799	-3.27788376218134
Chr4	1230000	1240000	10001	*	1.54704525958259	232.026156928939	499.232411846011	225.319967931362	401.771897176686	0.0038	3	0.5219	3	LS	1	7.86434809466993	8.65381921468288	-3.26812165119157
Chr4	1240000	1250000	10001	*	0.386761314895648	133.294954689374	590.766496584728	252.624622175618	98.3105431578227	0.003	2	0.5401	3	LS	1	7.06926129512574	6.63387498236985	-3.27928375747887
Chr4	1250000	1260000	10001	*	0.386761314895648	225.969668584259	459.799123338672	300.388910297649	176.308312798887	0.0032	1	0.5447	3	LS	1	7.82635570356034	7.47011636590187	-3.2764851241262
Chr4	1260000	1270000	10001	*	330.294162920883	108.181412501521	165.480224868851	287.170289700119	148.149286254794	0.003	1	0.5753	3	LS	1	6.77058345652343	7.22061326353144	-3.27928375747887
Chr4	1270000	1280000	10001	*	775.456436365774	214.796491810453	400.474707000197	243.667639602399	419.788206392761	0.0026	1	0.5351	3	LS	1	7.75352760099175	8.71695045995362	-3.2848973639424
Chr4	1280000	1290000	10001	*	429.691820849065	289.562796203396	1069.6192265827	248.513838594646	280.141305822639	0.0035	1	0.5084	3	LS	1	8.18270618122132	8.1351516226022	-3.27229732716276
Chr4	1290000	1300000	10001	*	915.850793672894	279.590474877243	757.607693357815	267.955204979886	1240.22741667259	0.0034	1	0.5179	3	LS	1	8.13232222481732	10.2775517537544	-3.27369190923451
Chr4	1300000	1310000	10001	*	1.16028394468694	163.211918667836	617.636967514508	285.077184298798	33.1620380562956	0.0035	0	0.5369	3	LS	1	7.359415032962	5.09432214145004	-3.27229732716276
Chr4	1310000	1320000	10001	*	1.54704525958259	168.64187373548	704.529789092627	246.533874025829	238.777609549617	0.0032	6	0.5202	3	LS	1	7.40634851282498	7.90555313585008	-3.2764851241262
Chr4	1320000	1330000	10001	*	479.970791785499	190.257271793216	368.75359261686	272.461981474622	142.244092338752	0.0031	1	0.5438	3	LS	1	7.57937079133463	7.16233183047184	-3.27788376218134
Chr4	1330000	1340000	10001	*	1118.51372267821	218.033580408472	615.612958015901	241.103114065646	32.0411447666764	0.0029	2	0.5327	3	LS	1	7.77500825857328	5.04619176713492	-3.28068511265548
Chr4	1340000	1350000	10001	*	1.16028394468694	292.799884801415	1482.97082159989	236.87918965217	5.13970581581498	0.0033	6	0.5012	3	LS	1	8.19869001999002	2.61816953047613	-3.27508784068439
Chr4	1350000	1360000	10001	*	401.071483546787	192.241293837163	583.682463339605	295.014720753717	75.9746939476054	0.0027	2	0.5204	3	LS	1	7.59425960718028	6.26631232099442	-3.28349191323125
Chr4	1360000	1370000	10001	*	688.821901829149	305.904872512748	1167.64410040315	295.335286445811	218.355480589969	0.0028	2	0.5171	3	LS	1	8.26164774041515	7.77712694227362	-3.28208783035557
Chr4	1370000	1380000	10001	*	44.0907898981039	233.696912334367	813.756508586407	342.797865681165	3.03461354018863	0.0034	1	0.5477	3	LS	1	7.8746550517074	2.01243049001979	-3.27369190923451
Chr4	1380000	1390000	10001	*	298.57973509944	180.546005999161	600.816750646776	322.941649576744	5.33107784087192	0.0029	4	0.5678	3	LS	1	7.50419138106081	2.66245113366742	-3.28068511265548
Chr4	1390000	1400000	10001	*	3.48085183406083	207.330303592443	760.678604321218	357.355319463323	106.348168210214	0.0036	5	0.5617	3	LS	1	7.70272889791337	6.74615376302463	-3.2709040918629
Chr4	1400000	1410000	10001	*	465.273861819464	238.813600763493	1200.48190968228	255.283431739458	1.99573683273667	0.0031	1	0.509	3	LS	1	7.90576967170293	1.5829108925611	-3.27788376218134
Chr4	1410000	1420000	10001	*	166.307365405129	247.637277748415	1239.95009490511	246.024740279562	1.77702594695731	0.0032	1	0.5169	3	LS	1	7.95789880310386	1.47354065694493	-3.2764851241262
Chr4	1420000	1430000	10001	*	796.341547370139	187.803349791492	845.617209831717	242.61165849903	28.7058037585411	0.0032	1	0.5293	3	LS	1	7.56074055132142	4.89267291937036	-3.2764851241262
Chr4	1430000	1440000	10001	*	462.179771300299	295.567073441656	849.246468243012	322.54565666298	5.24906125870466	0.003	2	0.5379	3	LS	1	8.21221462027339	2.64363948271393	-3.27928375747887
Chr4	1440000	1450000	10001	*	93.9829995196424	199.498637629495	530.988422944842	360.259267497588	6.86205404132744	0.0031	6	0.5864	3	LS	1	7.64744862350305	2.97490628043552	-3.27788376218134
Chr4	1450000	1460000	10001	*	383.280463061587	205.189648229237	789.887155189044	311.627566326362	1.91372025056941	0.003	6	0.5572	3	LS	1	7.68782809365809	1.54286236934124	-3.27928375747887
Chr4	1460000	1470000	10001	*	78.1257856089209	207.643570230961	711.997686208176	325.015898172647	14.7356459293844	0.003	1	0.5469	3	LS	1	7.70489665152706	3.97596449563957	-3.27928375747887
Chr4	1470000	1480000	10001	*	2.70732920426954	193.389938178395	759.666599571915	297.994096009651	16.1846055476727	0.0026	3	0.5243	3	LS	1	7.60280973528318	4.10304483161662	-3.2848973639424
Chr4	1480000	1490000	10001	*	2.70732920426954	143.00622048343	427.624351653923	295.768992970409	197.632624162375	0.0034	0	0.5511	0	Core	0	7.16998732135042	7.63395878571177	-3.27369190923451
Chr4	1490000	1500000	10001	*	537.984989019846	76.8547486497294	165.375534722371	324.71418928597	125.758759323132	0.0029	0	0.5577	0	Core	0	6.28271313219401	6.98594163400855	-3.28068511265548
Chr4	1500000	1510000	10001	*	115.641633153799	114.185689739781	157.768050744849	371.988200467151	285.062300752674	0.0034	0	0.5917	0	Core	0	6.84781768238959	8.16018557173904	-3.27369190923451
Chr4	1510000	1520000	10001	*	873.307049034373	175.116050931517	772.40390072694	281.060684744912	29.9087136303276	0.0023	1	0.5451	0	Core	0	7.46038258982426	4.94994170774526	-3.28912194980412
Chr4	1520000	1530000	10001	*	408.419948529804	111.940612163736	479.655354454314	351.717134643549	18.481069848356	0.0031	0	0.5592	0	Core	0	6.81942054596213	4.28400100344393	-3.27788376218134
Chr4	1530000	1540000	10001	*	0.773522629791296	207.539148018121	720.791658512468	246.45844680416	9.81465099934882	0.0034	0	0.5273	0	Core	0	7.70417442884056	3.43491520358689	-3.27369190923451
Chr4	1540000	1550000	10001	*	716.28195518674	144.207075931082	910.420410502627	266.823796654848	36.251329317929	0.0034	0	0.5249	0	Core	0	7.18196794725405	5.2192200041176	-3.27369190923451
Chr4	1550000	1560000	10001	*	1.93380657447824	120.607655829399	477.701138386694	290.941650783579	422.49475360428	0.003	0	0.5575	0	Core	0	6.92609024651206	8.72620028685057	-3.27928375747887
Chr4	1560000	1570000	10001	*	0	112.306089908674	250.20945008639	285.812599710073	191.59073594272	0.0029	0	0.5715	0	Core	0	6.82408159413642	7.58939449767604	-3.28068511265548
Chr4	1570000	1580000	10001	*	0.773522629791296	75.9671598405953	168.132375246336	292.186199941122	145.196689296773	0.0029	0	0.576	0	Core	0	6.26617110639212	7.19176683082425	-3.28068511265548
Chr4	1580000	1590000	10001	*	478.036985211021	176.421328592008	299.448715647324	313.475533257257	68.4018295274951	0.003	0	0.5505	0	Core	0	7.4710356425045	6.11690178961387	-3.27928375747887
Chr4	1590000	1600000	10001	*	475.329656006751	144.676975888859	637.179128190711	299.82320613513	170.184407997065	0.003	0	0.5416	0	Core	0	7.18662906857889	7.41940749239162	-3.27928375747887
Chr4	1600000	1610000	10001	*	1.54704525958259	198.872104352459	583.926740348057	263.618139733906	93.2255150634525	0.0029	0	0.5296	0	Core	0	7.64293332258423	6.55804587097978	-3.28068511265548
Chr4	1610000	1620000	10001	*	509.751413032464	63.7497609383965	314.768373748848	299.860919745964	95.9867399964169	0.003	0	0.5629	0	Core	0	6.01680296114406	6.59971561075325	-3.27928375747887
Chr4	1620000	1630000	10001	*	0.773522629791296	67.0390606428346	168.795412840707	335.83970448218	8.33835252033813	0.003	0	0.5951	0	Core	0	6.08829131796863	3.22316805096435	-3.27928375747887
Chr4	1630000	1640000	10001	*	0.773522629791296	78.6821373744173	168.446445685775	356.95932654956	142.626836388866	0.0033	0	0.5711	0	Core	0	6.31618444131589	7.16618152882312	-3.27508784068439
Chr4	1640000	1650000	10001	*	0.773522629791296	63.5409165127179	150.50953392226	275.177361454713	174.121203941094	0.0027	0	0.555	0	Core	0	6.01214215983593	7.45220996782716	-3.28349191323125
Chr4	1650000	1660000	10001	*	1125.08866503144	93.771147129697	152.393956558894	303.481426386086	67.2535973771534	0.0036	0	0.5784	0	Core	0	6.56637599548015	6.09283318167307	-3.2709040918629
Chr4	1660000	1670000	10001	*	1.16028394468694	122.800522299024	142.204115634873	270.387732878718	266.444536600706	0.0028	0	0.5551	0	Core	0	6.9518735908909	8.06309592215733	-3.28208783035557
Chr4	1670000	1680000	10001	*	997.844192430772	39.9937075174543	154.62734635046	258.621086298321	811.526741684318	0.0034	0	0.5604	0	Core	0	5.35733056973835	9.66627148521607	-3.27369190923451
Chr4	1680000	1690000	10001	*	0.386761314895648	127.96942183457	149.532425888449	338.988790986869	38.329082732833	0.0032	0	0.5429	0	Core	0	7.01088523839257	5.29752463376862	-3.2764851241262
Chr4	1690000	1700000	10001	*	1.16028394468694	93.1968249590808	253.140774187821	229.619319566508	117.092340474125	0.0033	0	0.5379	0	Core	0	6.55760652741134	6.8837715836516	-3.27508784068439
Chr4	1700000	1710000	10001	*	166.694126720024	105.988546031896	165.410431437865	314.833223247303	351.632426611767	0.0025	0	0.5583	0	Core	0	6.74131254277971	8.46202133477031	-3.28630418515664
Chr4	1710000	1720000	10001	*	0.386761314895648	95.6507469608046	131.455927262961	355.903345446191	248.236855359574	0.0031	0	0.5867	0	Core	0	6.59470897716851	7.96137360931247	-3.27788376218134
Chr4	1720000	1730000	10001	*	541.465840853907	133.660432434312	920.156594125236	194.07424135489	7.10810378782923	0.0033	0	0.5101	0	Core	0	7.07318219264232	3.01936455614919	-3.27508784068439
Chr4	1730000	1740000	10001	*	1.93380657447824	80.3006816734265	587.451308612872	291.14907564317	556.91993177642	0.0032	0	0.5492	0	Core	0	6.34519554365444	9.12391428258632	-3.2764851241262
Chr4	1740000	1750000	10001	*	1.54704525958259	92.570291682045	138.888927663017	288.301698025157	77.5330090087834	0.0032	0	0.5801	0	Core	0	6.54797864556953	6.29522727021193	-3.2764851241262
Chr4	1750000	1760000	10001	*	1260.06836393002	105.623068286958	115.577921713546	319.377713352873	58.0950790351427	0.0034	0	0.5901	0	Core	0	6.73637579393896	5.8849660942042	-3.27369190923451
Chr4	1760000	1770000	10001	*	1.54704525958259	86.4615922309456	139.063411240483	226.168524175141	56.3727308096302	0.0026	0	0.5649	0	Core	0	6.45057770768768	5.84229328346725	-3.2848973639424
Chr4	1770000	1780000	10001	*	466.434145764151	74.6096710736843	129.536607910834	350.265160626417	121.384541607545	0.003	0	0.5781	0	Core	0	6.24049887321856	6.9352775324904	-3.27928375747887
Chr4	1780000	1790000	10001	*	0.773522629791296	63.5931276191375	115.228954558614	299.219788361776	137.02236994077	0.0029	0	0.5726	0	Core	0	6.01330877254325	7.10875830016333	-3.28068511265548
Chr4	1790000	1800000	10001	*	0.773522629791296	84.0598813356415	118.648832676949	356.808472106221	340.724221183522	0.0029	0	0.5869	0	Core	0	6.41040693719408	8.41668869842258	-3.28068511265548
Chr4	1800000	1810000	10001	*	0.386761314895648	122.852733405444	163.246835077285	290.036524123549	1822.49047233869	0.0031	0	0.5632	0	Core	0	6.95248189870589	10.8324869463347	-3.27788376218134
Chr4	1810000	1820000	10001	*	0.773522629791296	96.6949690891976	133.096072891143	274.347662016352	40.543530451349	0.0029	0	0.5596	0	Core	0	6.61021236581241	5.37655191935652	-3.28068511265548
Chr4	1820000	1830000	10001	*	0.386761314895648	99.8276354743768	117.985795082578	304.78254595988	352.807997622831	0.0036	0	0.5917	0	Core	0	6.65574730577016	8.4668228494492	-3.2709040918629
Chr4	1830000	1840000	10001	*	371.677623614718	111.000812248183	119.276973555827	231.995277049088	45.4098476599398	0.0032	0	0.5659	0	Core	0	6.8073653847556	5.536359056765	-3.2764851241262
Chr4	1840000	1850000	10001	*	1.16028394468694	62.3400610650658	131.665307555921	274.743654930116	127.781835016592	0.0031	0	0.5912	0	Core	0	5.98504635313167	7.00878530201886	-3.27788376218134
Chr4	1850000	1860000	10001	*	959.168060941207	52.9942730159479	99.0717752852527	317.756028086985	143.80240739993	0.0026	0	0.5975	0	Core	0	5.7547344886514	7.17794177779715	-3.2848973639424
Chr4	1860000	1870000	10001	*	1.54704525958259	83.4333480586057	108.668372045888	294.769582283292	88.7146030442532	0.0032	0	0.6051	0	Core	0	6.39974101771167	6.48727092980683	-3.2764851241262
Chr4	1870000	1880000	10001	*	0.386761314895648	114.44674527188	133.759110485514	269.501463024105	60.7469485252175	0.0031	2	0.5535	0	Core	0	6.8510836903332	5.94829593674558	-3.27788376218134
Chr4	1880000	1890000	10001	*	1.16028394468694	61.1392056174138	150.195463482821	286.397160678009	190.79790898177	0.0029	0	0.5551	0	Core	0	5.95743189316812	7.58344318167365	-3.28068511265548
Chr4	1890000	1900000	10001	*	205.757019524485	125.358866513587	143.14632695319	345.400104828753	56.8648303026338	0.003	0	0.5912	0	Core	0	6.98138309051472	5.85461485304584	-3.27928375747887
Chr4	1900000	1910000	10001	*	0	71.5292157949248	124.790654603756	259.356501709596	2002.05210956355	0.0028	0	0.5701	0	Core	0	6.18049034507851	10.9679842381297	-3.28208783035557
Chr4	1910000	1920000	10001	*	119.896007617651	60.2516168082797	90.8361504288527	289.697101626037	274.974261146101	0.0031	0	0.5889	0	Core	0	5.93667602113321	8.10838990950117	-3.27788376218134
Chr4	1920000	1930000	10001	*	0.386761314895648	65.7859940887629	120.986912614995	336.480835866368	156.514977635855	0.0033	0	0.5839	0	Core	0	6.06147367696847	7.29934520653719	-3.27508784068439
Chr4	1930000	1940000	10001	*	915.077271043103	87.7668698914369	119.207180124841	301.633459455191	109.273426307513	0.0034	0	0.5822	0	Core	0	6.47194942054276	6.78494136190699	-3.27369190923451
Chr4	1940000	1950000	10001	*	0.386761314895648	98.1046689625283	91.5340847387171	308.685904681262	24.4956192072884	0.003	0	0.6294	0	Core	0	6.6308811213245	4.67217747174131	-3.27928375747887
Chr4	1950000	1960000	10001	*	1447.26084033951	83.1722925265074	121.196292907954	265.334109026881	109.874881243406	0.0035	0	0.5765	0	Core	0	6.39527350617163	6.79278874905064	-3.27229732716276
Chr4	1960000	1970000	10001	*	151.610435439094	99.5665799422785	126.77976738687	391.655848517399	24.4956192072884	0.0036	0	0.5726	0	Core	0	6.6520071414192	4.67217747174131	-3.2709040918629
Chr4	1970000	1980000	10001	*	8.8955102425999	65.5771496630843	225.258298508738	272.179129393362	15.747183776114	0.0031	0	0.5756	0	Core	0	6.05695520124782	4.06584660575148	-3.27788376218134
Chr4	1980000	1990000	10001	*	0.773522629791296	55.4481950176716	368.962972909819	274.969936595123	1.47629847901069	0.004	0	0.5774	0	Core	0	5.81885554513831	1.3081852193323	-3.26534456652099
Chr4	1990000	2000000	10001	*	0.386761314895648	72.4690157104786	180.241535522483	318.133164195331	12.2204707429218	0.0038	0	0.5992	0	Core	0	6.19906404136118	3.72470164286667	-3.26812165119157
Chr4	2000000	2010000	10001	*	2.32056788937389	119.093533743229	360.901831630885	239.915135324356	30.7015405912778	0.0029	0	0.5477	0	Core	0	6.90801466315198	4.98648104722018	-3.28068511265548
Chr4	2010000	2020000	10001	*	1.54704525958259	76.3848486919525	118.893109685402	288.98054302018	190.387826070934	0.0027	0	0.5833	0	Core	0	6.27397922124774	7.58035525457427	-3.28349191323125
Chr4	2020000	2030000	10001	*	450.57693185343	52.0544731003942	98.164460682429	360.127269859667	191.207991892606	0.0033	0	0.5944	0	Core	0	5.72940248688893	7.58652451352491	-3.27508784068439
Chr4	2030000	2040000	10001	*	486.545734138725	63.1232276613606	138.854030947524	318.246305027835	50.0847928434736	0.0032	0	0.5657	0	Core	0	6.00277514068305	5.67482198185306	-3.2764851241262
Chr4	2040000	2050000	10001	*	449.416647908743	94.9197914709294	120.742635606543	276.553908250177	264.476138628692	0.0037	0	0.573	0	Core	0	6.58375661723225	8.05243838515791	-3.26951220073622
Chr4	2050000	2060000	10001	*	1011.76759976701	85.051892357615	169.80741759001	346.097806629193	37.6182723540501	0.0035	0	0.5475	0	Core	0	6.42713501364823	5.27121171950747	-3.27229732716276
Chr4	2060000	2070000	10001	*	0.773522629791296	67.6655939198705	122.522368096697	346.154377045445	1388.48605837027	0.0036	0	0.5778	0	Core	0	6.10151548774499	10.4403356437627	-3.2709040918629
Chr4	2070000	2080000	10001	*	0.386761314895648	61.0869945109942	129.571504626327	269.46374941327	127.180380080698	0.0026	0	0.5629	0	Core	0	5.95621919071616	7.0020316426326	-3.2848973639424
Chr4	2080000	2090000	10001	*	1.54704525958259	69.388560431719	128.768880169983	285.416606796309	58.4504842245342	0.0033	0	0.5633	0	Core	0	6.13726907560422	5.89361665566551	-3.27508784068439
Chr4	2090000	2100000	10001	*	0.386761314895648	142.95400937701	164.189046395602	300.068344605554	122.833501225834	0.0037	0	0.5615	0	Core	0	7.16946416087668	6.95225785581351	-3.26951220073622
Chr4	2100000	2110000	10001	*	499.695618845177	82.0236481852751	98.5483245528544	296.146129078755	93.4989036706767	0.0039	0	0.5871	0	Core	0	6.37545042243435	6.56222568688718	-3.26673244064524
Chr4	2110000	2120000	10001	*	332.227969495362	87.7668698914369	130.409025798165	328.221555093589	14.2982241578257	0.0031	0	0.5706	0	Core	0	6.47194942054276	3.93529228719137	-3.27788376218134
Chr4	2120000	2130000	10001	*	1023.37043921388	117.005089486443	177.833662153451	287.660566640969	44.7537150026017	0.0033	0	0.5396	0	Core	0	6.88270527324751	5.51581698360067	-3.27508784068439
Chr4	2130000	2140000	10001	*	1.54704525958259	103.482412923753	173.820539871731	253.228039948972	202.717652256745	0.0027	0	0.5295	0	Core	0	6.7071163098511	7.67042718588548	-3.28349191323125
Chr4	2140000	2150000	10001	*	873.693810349269	129.744599452838	119.940011150199	315.323500188153	148.559369165631	0.0029	0	0.5632	0	Core	0	7.03060754539783	7.2245744808766	-3.28068511265548
Chr4	2150000	2160000	10001	*	220.840710805415	58.0065392322346	102.805723843027	309.798456200883	36.4973790644308	0.0029	0	0.584	0	Core	0	5.88280294080493	5.22871785468543	-3.28068511265548
Chr4	2160000	2170000	10001	*	1.16028394468694	54.038495144341	141.959838626421	407.910414787115	17.6882428874058	0.0033	0	0.562	0	Core	0	5.78236911947904	4.2240590247626	-3.27508784068439
Chr4	2170000	2180000	10001	*	843.139666472512	84.9474701447757	157.035219719492	338.272232381012	15.6925060546691	0.0038	0	0.5611	0	Core	0	6.42538326963082	4.06112865840953	-3.26812165119157
Chr4	2180000	2190000	10001	*	23.2056788937389	54.2473395700196	137.144091888356	347.38006939757	36.8527842538223	0.0036	0	0.5531	0	Core	0	5.78783308823213	5.24232751614064	-3.2709040918629
Chr4	2190000	2200000	10001	*	520.580729849542	133.086110263696	191.617864773273	251.474357045163	111.979973519033	0.0031	0	0.5516	0	Core	0	7.0670159886015	6.81992325741263	-3.27788376218134
Chr4	2200000	2210000	10001	*	841.205859898034	102.490401901779	162.6535909139	265.522677081054	292.635165172785	0.0031	0	0.539	0	Core	0	6.69335316261234	8.19788094263721	-3.27788376218134
Chr4	2210000	2220000	10001	*	0.773522629791296	77.3246486075063	145.449510175743	259.092506433753	53.5294892944985	0.003	0	0.5722	0	Core	0	6.2913944870503	5.76896473859424	-3.27928375747887
Chr4	2220000	2230000	10001	*	1.54704525958259	81.6581704403375	142.343702496846	332.162627425805	133.632351211189	0.0042	0	0.5712	0	Core	0	6.36908552627628	7.07288131089614	-3.26257281727094
Chr4	2230000	2240000	10001	*	475.716417321647	151.725475255512	144.577092288412	339.271643068129	329.18722195866	0.0036	0	0.5768	0	Core	0	7.25479691961965	8.3671404797001	-3.2709040918629
Chr4	2240000	2250000	10001	*	11.9896007617651	130.841032687651	147.857383544775	328.862686477777	198.070045933934	0.0033	0	0.5719	0	Core	0	7.04265563782959	7.63713234486803	-3.27508784068439
Chr4	2250000	2260000	10001	*	26.2997694129041	117.318356124961	167.922994953377	292.563336049468	3873.26043170959	0.0029	0	0.5682	0	Core	0	6.88653010314887	11.9197052212846	-3.28068511265548
Chr4	2260000	2270000	10001	*	174.429353017937	99.6710021551178	173.262192423839	250.51265996888	1131.30939555447	0.003	0	0.5358	0	Core	0	6.65350437091852	10.1450525029412	-3.27928375747887
Chr4	2270000	2280000	10001	*	502.402948049447	87.453603252919	146.042754339127	200.57983922386	213.516502242101	0.0025	0	0.5454	0	Core	0	6.46684900873848	7.74494482485192	-3.28630418515664
Chr4	2280000	2290000	10001	*	1.54704525958259	44.6927070952231	158.221708046261	251.266932185572	1570.4535153387	0.0022	0	0.5688	0	Core	0	5.51389201340568	10.6178838815317	-3.29053289861183
Chr4	2290000	2300000	10001	*	2.32056788937389	59.311816892726	128.036049144626	332.502049923317	93.3348705063422	0.0038	1	0.5717	0	Core	0	5.91436879190993	6.55971925080834	-3.26812165119157
Chr4	2300000	2310000	10001	*	418.862504031987	131.833043709624	141.261904316556	277.572175742711	137.760519180275	0.0031	0	0.549	0	Core	0	7.05347026767977	7.11645333344627	-3.27788376218134
Chr4	2310000	2320000	10001	*	1717.60699945157	197.514615585548	235.762209872197	262.166165716774	85.379262036118	0.0036	3	0.5182	0	Core	0	7.63310141909032	6.43261308610953	-3.2709040918629
Chr4	2320000	2330000	10001	*	157.798616477424	713.569191437399	498.813651260092	134.260454571203	0.0273388607224201	0.006	3	0.3686	0	Core	0	9.48092990341994	0.0389121232814827	-3.23786383009889
Chr4	2330000	2340000	10001	*	1128.18275555061	1069.2834594745	680.93960941921	26.0223914758792	0.0546777214448402	0.0449	6	0.2346	0	Core	0	10.0637772228023	0.0768022210143885	-2.78687049999252
[truncated: 1,612 more rows]
