# Supplementary material for: A unique chromatin profile defines adaptive genomic regions in a fungal plant pathogen
Source: eLife journal article supplement (doi:10.7554/elife.62208), 2020-12-18
Supplement: supp [file elife-62208-supp-v1.zip › elife_poa_e62208_Figure_6_figure_supplement_2.pdf]

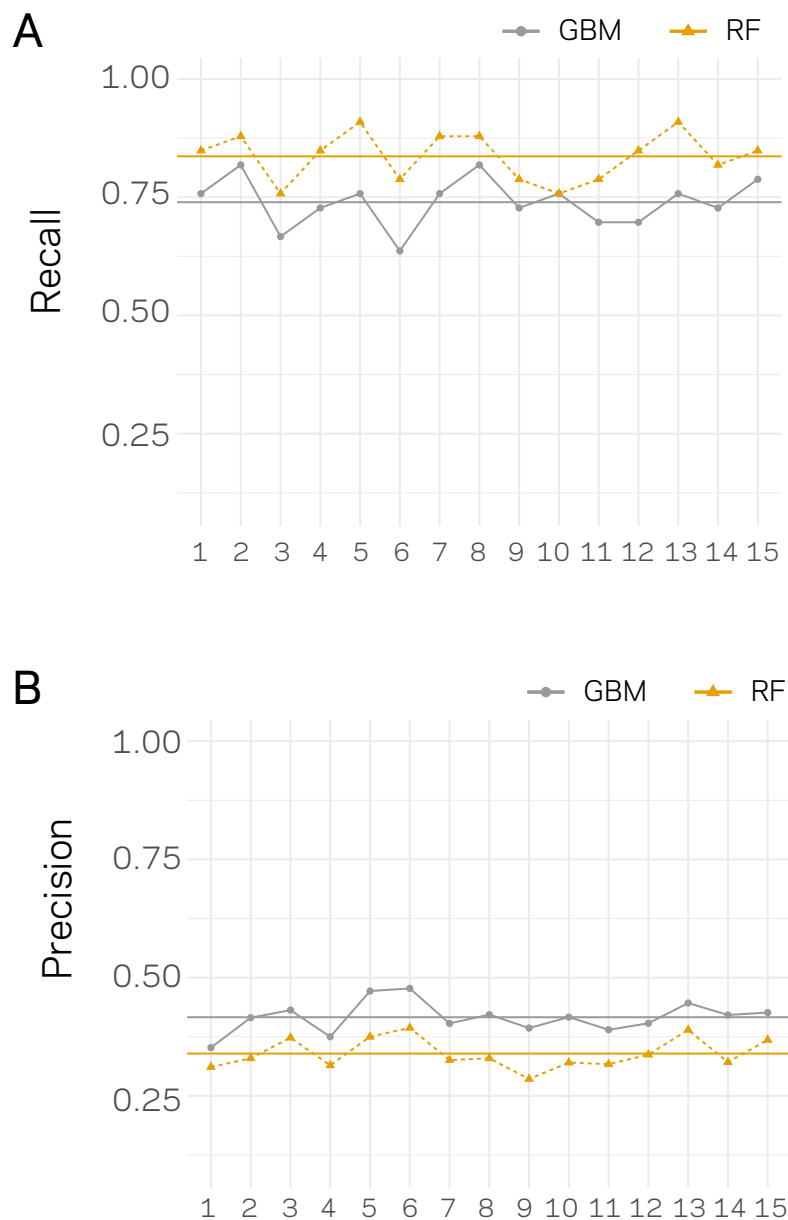

Figure 6- figure supplement 2. Recall and Precision assessment for independent classification trials. For each trail, the data set were split 80:20, training and testing, 15 independent times. For each data split, the model was trained and tested and the performance was assessed using Recall (A) and Precision (B). The x-axis' show the data split trial. Results for each trial are shown as an orange triangle connected with a dashed line for Random Forrest (RF) based classification and a grey point for Stochastic Gradient Boosting (GBM). The mean across the 15 trials is shown by a solid horizontal line of the respective color.
