# Supplementary material for: A unique chromatin profile defines adaptive genomic regions in a fungal plant pathogen
Source: eLife journal article supplement (doi:10.7554/elife.62208), 2020-12-18
Supplement: supp [file elife-62208-supp-v1.zip › elife_poa_e62208_Figure_6_figure_supplement_3.pdf]

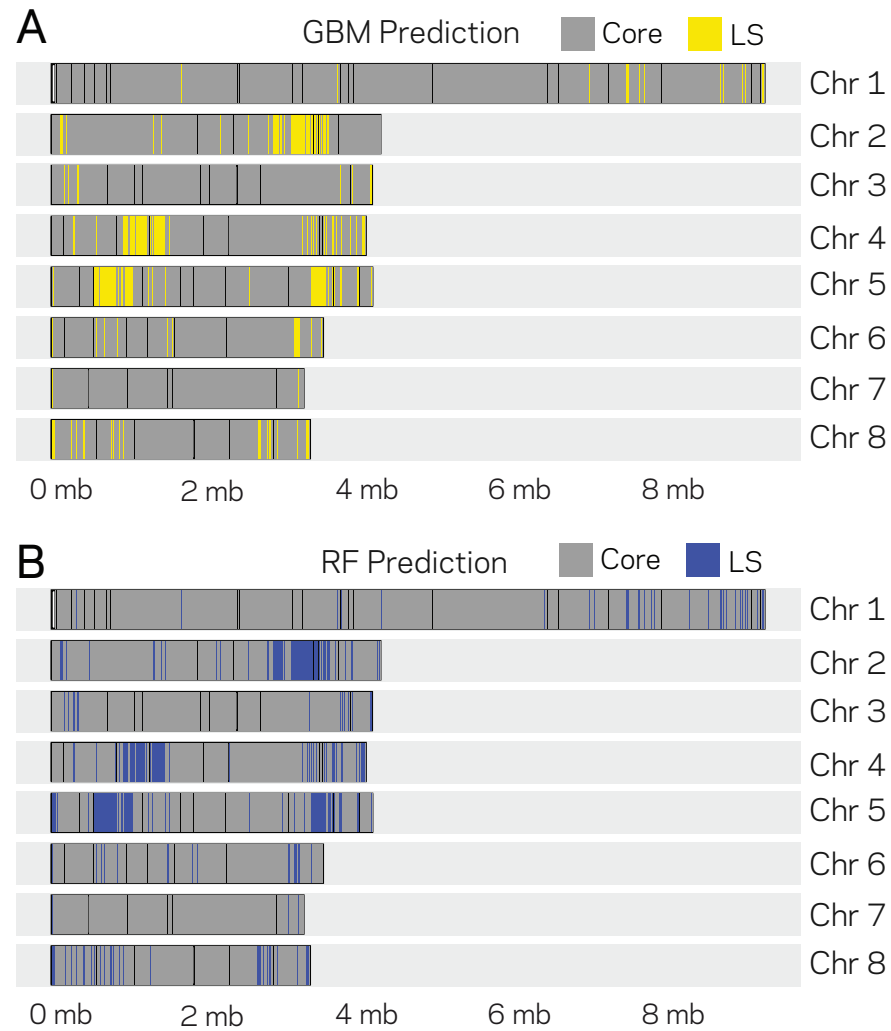

Figure 6- figure supplement 3. Genomic location of LS predictions from two ML models. The eight chromosomes of *V. dahliae* are labeled at the right (Chr. X) along with the physical DNA size indicated at the bottom. A) GBM model predictions for 10 kb windows as either core or LS regions are shown in grey and yellow respectively. The GBM model predicted a total of 285 LS regions. B) RF model predictions for 10 kb windows as either core and LS regions shown are shown in grey and blue respectively. The RF model predicted a total of 388 LS regions.
