# Supplementary material for: A unique chromatin profile defines adaptive genomic regions in a fungal plant pathogen
Source: eLife journal article supplement (doi:10.7554/elife.62208), 2020-12-18
Supplement: supp [file elife-62208-supp-v1.zip › elife_poa_e62208_Figure_6_figure_supplement_4.pdf]

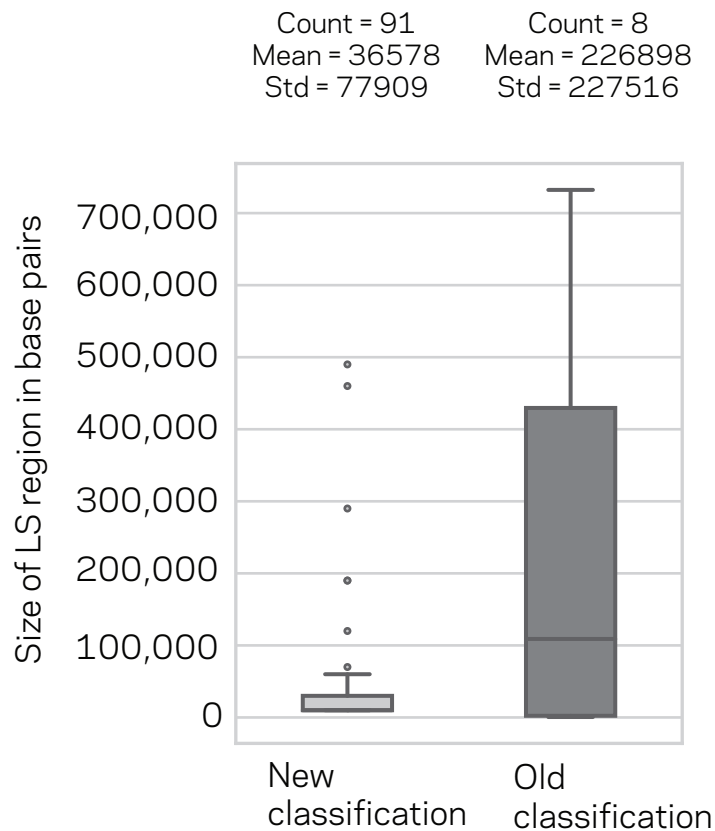

Figure 6- figure supplement 4. Size distribution and summary description of the New and Old LS classifications. Box plot of the LS region sizes for the New classification based on model consensus and the previous LS classification. The number of regions, their mean and standard deviation (Std) are shown above the respective box plots. The means were not statistically significantly different, Mann-Whitney U-Test, p-value=0.93.
