# Supplementary material for: A unique chromatin profile defines adaptive genomic regions in a fungal plant pathogen
Source: eLife journal article supplement (doi:10.7554/elife.62208), 2020-12-18
Supplement: supp [file elife-62208-supp-v1.zip › elife_poa_e62208_Figure_6_source_data_1.txt]

Chr1	1690000	1700000
Chr1	2110000	2120000
Chr1	3720000	3730000
Chr1	5100000	5110000
Chr1	6990000	7000000
Chr1	7480000	7510000
Chr1	7650000	7660000
Chr1	7710000	7720000
Chr1	8680000	8710000
Chr1	8740000	8750000
Chr1	8990000	9030000
Chr1	9250000	9270000
Chr2	0	10000
Chr2	110000	150000
Chr2	190000	200000
Chr2	1320000	1330000
Chr2	1420000	1430000
Chr2	2190000	2200000
Chr2	2560000	2570000
Chr2	2680000	2690000
Chr2	2810000	2830000
Chr2	2880000	3000000
Chr2	3030000	3040000
Chr2	3120000	3610000
Chr3	160000	170000
Chr3	220000	230000
Chr3	330000	360000
Chr3	2850000	2860000
Chr3	3750000	3760000
Chr3	3910000	3920000
Chr3	4150000	4168633
Chr4	0	10000
Chr4	280000	300000
Chr4	580000	590000
Chr4	930000	990000
Chr4	1020000	1480000
Chr4	1510000	1540000
Chr4	1600000	1610000
Chr4	3260000	3270000
Chr4	3330000	3340000
Chr4	3380000	3410000
Chr4	3440000	3450000
Chr4	3540000	3580000
Chr4	3630000	3670000
Chr4	3700000	3710000
Chr4	3770000	3780000
Chr4	3960000	3970000
Chr4	4040000	4080000
Chr5	0	30000
Chr5	470000	480000
Chr5	550000	840000
Chr5	870000	1060000
Chr5	1260000	1270000
Chr5	1310000	1320000
Chr5	1380000	1390000
Chr5	1480000	1490000
Chr5	2570000	2580000
Chr5	3380000	3570000
Chr5	3600000	3610000
Chr5	3650000	3690000
Chr5	3750000	3780000
Chr5	3930000	3940000
Chr5	3980000	4000000
Chr5	4160000	4170000
Chr6	0	20000
Chr6	170000	180000
Chr6	580000	610000
Chr6	680000	690000
Chr6	850000	870000
Chr6	1470000	1510000
Chr6	3060000	3070000
Chr6	3110000	3120000
Chr6	3160000	3230000
Chr6	3370000	3390000
Chr6	3520000	3530000
Chr7	10000	20000
Chr7	3210000	3220000
Chr8	0	40000
Chr8	250000	260000
Chr8	320000	330000
Chr8	410000	440000
Chr8	520000	530000
Chr8	770000	810000
Chr8	880000	890000
Chr8	930000	940000
Chr8	2690000	2720000
Chr8	2760000	2770000
Chr8	2800000	2860000
Chr8	2940000	2950000
Chr8	3200000	3210000
Chr8	3310000	3350000
