# Supplementary material for: A unique chromatin profile defines adaptive genomic regions in a fungal plant pathogen
Source: eLife journal article supplement (doi:10.7554/elife.62208), 2020-12-18
Supplement: supp [file elife-62208-supp-v1.zip › elife_poa_e62208_Figure_6_source_data_2.txt]

Chrom	Start	End	feat	strand	Name	Absent_c	Present_c	CoreDesig	Absent_mean	log10_mean
Chr1	95919	100448	mRNA	-	VDAG_JR2_Chr1g00010.1	0.0	43.0	0	0.0	-0.3010299956639812
Chr1	100674	106913	mRNA	+	VDAG_JR2_Chr1g00020.1	0.0	43.0	0	0.0	-0.3010299956639812
Chr1	106967	108991	mRNA	-	VDAG_JR2_Chr1g00030.1	0.0	43.0	0	0.0	-0.3010299956639812
Chr1	109150	110146	mRNA	+	VDAG_JR2_Chr1g00040.1	0.0	43.0	0	0.0	-0.3010299956639812
Chr1	109890	114598	mRNA	-	VDAG_JR2_Chr1g00050.1	0.0	43.0	0	0.0	-0.3010299956639812
Chr1	115849	116907	mRNA	+	VDAG_JR2_Chr1g00060.1	0.0	43.0	0	0.0	-0.3010299956639812
Chr1	116793	118314	mRNA	-	VDAG_JR2_Chr1g00070.1	0.0	43.0	0	0.0	-0.3010299956639812
Chr1	118782	119550	mRNA	+	VDAG_JR2_Chr1g00080.1	0.0	43.0	0	0.0	-0.3010299956639812
Chr1	119525	122333	mRNA	+	VDAG_JR2_Chr1g00090.1	0.0	43.0	0	0.0	-0.3010299956639812
Chr1	122724	124875	mRNA	+	VDAG_JR2_Chr1g00100.1	0.0	43.0	0	0.0	-0.3010299956639812
Chr1	125213	127877	mRNA	+	VDAG_JR2_Chr1g00110.1	0.0	43.0	0	0.0	-0.3010299956639812
Chr1	127929	128638	mRNA	-	VDAG_JR2_Chr1g00120.1	0.0	43.0	0	0.0	-0.3010299956639812
Chr1	128815	131545	mRNA	+	VDAG_JR2_Chr1g00130.1	0.0	43.0	0	0.0	-0.3010299956639812
Chr1	130885	134116	mRNA	-	VDAG_JR2_Chr1g00140.1	0.0	43.0	0	0.0	-0.3010299956639812
Chr1	134332	136170	mRNA	-	VDAG_JR2_Chr1g00150.1	0.0	43.0	0	0.0	-0.3010299956639812
Chr1	136331	137939	mRNA	+	VDAG_JR2_Chr1g00160.1	0.0	43.0	0	0.0	-0.3010299956639812
Chr1	139431	144139	mRNA	-	VDAG_JR2_Chr1g00170.1	0.0	43.0	0	0.0	-0.3010299956639812
Chr1	145871	146516	mRNA	-	VDAG_JR2_Chr1g00180.1	0.0	43.0	0	0.0	-0.3010299956639812
Chr1	149245	149954	mRNA	-	VDAG_JR2_Chr1g00190.1	0.0	43.0	0	0.0	-0.3010299956639812
Chr1	150094	153864	mRNA	-	VDAG_JR2_Chr1g00200.1	0.0	43.0	0	0.0	-0.3010299956639812
Chr1	161015	164654	mRNA	-	VDAG_JR2_Chr1g00210.1	0.0	43.0	0	0.0	-0.3010299956639812
Chr1	164876	168188	mRNA	+	VDAG_JR2_Chr1g00220.1	0.0	43.0	0	0.0	-0.3010299956639812
Chr1	169615	174014	mRNA	+	VDAG_JR2_Chr1g00230.1	0.0	43.0	0	0.0	-0.3010299956639812
Chr1	172327	174499	mRNA	-	VDAG_JR2_Chr1g00240.1	0.0	43.0	0	0.0	-0.3010299956639812
Chr1	174498	175888	mRNA	+	VDAG_JR2_Chr1g00250.1	0.0	43.0	0	0.0	-0.3010299956639812
Chr1	178982	180954	mRNA	+	VDAG_JR2_Chr1g00260.1	0.0	43.0	0	0.0	-0.3010299956639812
Chr1	181183	182394	mRNA	+	VDAG_JR2_Chr1g00270.1	0.0	43.0	0	0.0	-0.3010299956639812
Chr1	182745	183961	mRNA	-	VDAG_JR2_Chr1g00280.1	0.0	43.0	0	0.0	-0.3010299956639812
Chr1	184466	187662	mRNA	+	VDAG_JR2_Chr1g00290.1	0.0	43.0	0	0.0	-0.3010299956639812
Chr1	187795	190330	mRNA	-	VDAG_JR2_Chr1g00300.1	0.0	43.0	0	0.0	-0.3010299956639812
Chr1	190700	195776	mRNA	+	VDAG_JR2_Chr1g00310.1	0.0	43.0	0	0.0	-0.3010299956639812
Chr1	195810	197685	mRNA	+	VDAG_JR2_Chr1g00320.1	0.0	43.0	0	0.0	-0.3010299956639812
Chr1	203378	206944	mRNA	+	VDAG_JR2_Chr1g00330.1	0.0	43.0	0	0.0	-0.3010299956639812
Chr1	207790	210034	mRNA	-	VDAG_JR2_Chr1g00340.1	0.0	43.0	0	0.0	-0.3010299956639812
Chr1	211415	215428	mRNA	+	VDAG_JR2_Chr1g00350.1	0.0	43.0	0	0.0	-0.3010299956639812
Chr1	216158	218299	mRNA	+	VDAG_JR2_Chr1g00360.1	0.0	43.0	0	0.0	-0.3010299956639812
Chr1	218483	220570	mRNA	-	VDAG_JR2_Chr1g00370.1	0.0	43.0	0	0.0	-0.3010299956639812
Chr1	221027	222004	mRNA	+	VDAG_JR2_Chr1g00380.1	0.0	43.0	0	0.0	-0.3010299956639812
Chr1	222265	224662	mRNA	-	VDAG_JR2_Chr1g00390.1	0.0	43.0	0	0.0	-0.3010299956639812
Chr1	225260	226924	mRNA	+	VDAG_JR2_Chr1g00400.1	0.0	43.0	0	0.0	-0.3010299956639812
Chr1	226934	229850	mRNA	-	VDAG_JR2_Chr1g00410.1	0.0	43.0	0	0.0	-0.3010299956639812
Chr1	232412	236100	mRNA	+	VDAG_JR2_Chr1g00420.1	0.0	43.0	0	0.0	-0.3010299956639812
Chr1	236196	238480	mRNA	+	VDAG_JR2_Chr1g00430.1	0.0	43.0	0	0.0	-0.3010299956639812
Chr1	237337	238501	mRNA	-	VDAG_JR2_Chr1g00440.1	0.0	43.0	0	0.0	-0.3010299956639812
Chr1	238552	242703	mRNA	+	VDAG_JR2_Chr1g00450.1	0.0	43.0	0	0.5853658536585366	0.035576154261196126
Chr1	243144	249734	mRNA	-	VDAG_JR2_Chr1g00460.1	0.0	43.0	0	0.4393939393939394	-0.027152246043614773
Chr1	251341	253202	mRNA	-	VDAG_JR2_Chr1g00470.1	0.0	43.0	0	0.0	-0.3010299956639812
Chr1	253329	254020	mRNA	+	VDAG_JR2_Chr1g00480.1	0.0	43.0	0	0.0	-0.3010299956639812
Chr1	254112	256460	mRNA	-	VDAG_JR2_Chr1g00490.1	0.0	43.0	0	0.0	-0.3010299956639812
Chr1	256638	262114	mRNA	+	VDAG_JR2_Chr1g00500.1	0.0	43.0	0	0.14545454545454545	-0.19013433643914973
Chr1	260131	262085	mRNA	-	VDAG_JR2_Chr1g00510.1	0.0	43.0	0	0.4	-0.045757490560675115
Chr1	262565	263954	mRNA	-	VDAG_JR2_Chr1g00520.1	0.0	43.0	0	0.5	0.0
Chr1	265288	270976	mRNA	-	VDAG_JR2_Chr1g00530.1	0.0	43.0	0	0.22807017543859648	-0.13782675896039867
Chr1	272316	276028	mRNA	-	VDAG_JR2_Chr1g00540.1	0.0	43.0	0	0.0	-0.3010299956639812
Chr1	276183	278789	mRNA	-	VDAG_JR2_Chr1g00550.1	0.0	43.0	0	0.0	-0.3010299956639812
Chr1	278871	279803	mRNA	+	VDAG_JR2_Chr1g00560.1	0.0	43.0	0	0.0	-0.3010299956639812
Chr1	280436	282197	mRNA	+	VDAG_JR2_Chr1g00570.1	0.0	43.0	0	0.0	-0.3010299956639812
Chr1	282264	283989	mRNA	+	VDAG_JR2_Chr1g00580.1	0.0	43.0	0	2.176470588235294	0.42756247527883845
Chr1	285015	287077	mRNA	-	VDAG_JR2_Chr1g00590.1	0.0	43.0	0	0.0	-0.3010299956639812
Chr1	290434	292427	mRNA	-	VDAG_JR2_Chr1g00600.1	0.0	43.0	0	0.0	-0.3010299956639812
Chr1	293075	295565	mRNA	+	VDAG_JR2_Chr1g00610.1	1.0	41.0	0	0.08	-0.23657200643706275
Chr1	295360	296866	mRNA	-	VDAG_JR2_Chr1g00620.1	0.0	43.0	0	0.0	-0.3010299956639812
Chr1	297432	300087	mRNA	-	VDAG_JR2_Chr1g00630.1	0.0	43.0	0	0.0	-0.3010299956639812
Chr1	300338	302806	mRNA	-	VDAG_JR2_Chr1g00640.1	0.0	43.0	0	0.0	-0.3010299956639812
Chr1	304518	307298	mRNA	+	VDAG_JR2_Chr1g00650.1	0.0	43.0	0	0.39285714285714285	-0.04921802267018164
Chr1	307478	309481	mRNA	-	VDAG_JR2_Chr1g00660.1	0.0	43.0	0	0.15	-0.18708664335714442
Chr1	312037	313694	mRNA	-	VDAG_JR2_Chr1g00670.1	0.0	43.0	0	0.0	-0.3010299956639812
Chr1	314591	317939	mRNA	+	VDAG_JR2_Chr1g00680.1	0.0	43.0	0	0.06060606060606061	-0.25134221147487373
Chr1	319917	321670	mRNA	+	VDAG_JR2_Chr1g00690.1	0.0	43.0	0	0.0	-0.3010299956639812
Chr1	322744	323932	mRNA	-	VDAG_JR2_Chr1g00700.1	0.0	43.0	0	1.3333333333333333	0.2632414347745814
Chr1	325765	327208	mRNA	-	VDAG_JR2_Chr1g00710.1	0.0	43.0	0	0.14285714285714285	-0.1918855262389132
Chr1	329498	330091	mRNA	+	VDAG_JR2_Chr1g00720.1	0.0	43.0	0	0.0	-0.3010299956639812
Chr1	330901	333833	mRNA	-	VDAG_JR2_Chr1g00730.1	0.0	43.0	0	0.0	-0.3010299956639812
Chr1	334136	336551	mRNA	+	VDAG_JR2_Chr1g00740.1	0.0	43.0	0	0.0	-0.3010299956639812
Chr1	336547	337686	mRNA	-	VDAG_JR2_Chr1g00750.1	0.0	43.0	0	1.4166666666666667	0.28254658996996806
Chr1	338107	340840	mRNA	+	VDAG_JR2_Chr1g00760.1	0.0	43.0	0	0.0	-0.3010299956639812
Chr1	340632	341814	mRNA	-	VDAG_JR2_Chr1g00770.1	0.0	43.0	0	1.3333333333333333	0.2632414347745814
Chr1	342729	344187	mRNA	+	VDAG_JR2_Chr1g00780.1	0.0	43.0	0	0.2	-0.1549019599857432
Chr1	345122	346675	mRNA	+	VDAG_JR2_Chr1g00790.1	0.0	43.0	0	0.0	-0.3010299956639812
Chr1	346598	348791	mRNA	-	VDAG_JR2_Chr1g00800.1	0.0	43.0	0	0.18181818181818182	-0.16633142176652496
Chr1	348957	350322	mRNA	+	VDAG_JR2_Chr1g00810.1	0.0	43.0	0	0.0	-0.3010299956639812
Chr1	350760	352672	mRNA	-	VDAG_JR2_Chr1g00820.1	0.0	43.0	0	0.0	-0.3010299956639812
Chr1	353619	354407	mRNA	-	VDAG_JR2_Chr1g00830.1	0.0	43.0	0	0.0	-0.3010299956639812
Chr1	354611	356556	mRNA	-	VDAG_JR2_Chr1g00840.1	0.0	43.0	0	1.2	0.2304489213782739
Chr1	357140	359574	mRNA	-	VDAG_JR2_Chr1g00850.1	0.0	43.0	0	0.0	-0.3010299956639812
Chr1	359962	361733	mRNA	-	VDAG_JR2_Chr1g00860.1	0.0	43.0	0	0.0	-0.3010299956639812
Chr1	361836	363736	mRNA	+	VDAG_JR2_Chr1g00870.1	0.0	43.0	0	0.0	-0.3010299956639812
Chr1	364336	370309	mRNA	+	VDAG_JR2_Chr1g00880.1	0.0	43.0	0	0.0	-0.3010299956639812
Chr1	371812	372531	mRNA	+	VDAG_JR2_Chr1g00890.1	0.0	43.0	0	0.0	-0.3010299956639812
Chr1	372541	373442	mRNA	-	VDAG_JR2_Chr1g00900.1	0.0	43.0	0	0.0	-0.3010299956639812
Chr1	374613	376285	mRNA	-	VDAG_JR2_Chr1g00910.1	0.0	43.0	0	0.0	-0.3010299956639812
Chr1	379359	381261	mRNA	-	VDAG_JR2_Chr1g00920.1	0.0	43.0	0	0.10526315789473684	-0.21805576059921727
Chr1	382492	383414	mRNA	+	VDAG_JR2_Chr1g00930.1	0.0	43.0	0	0.0	-0.3010299956639812
Chr1	383634	385111	mRNA	+	VDAG_JR2_Chr1g00940.1	0.0	43.0	0	0.3333333333333333	-0.07918124604762487
Chr1	385374	386557	mRNA	+	VDAG_JR2_Chr1g00950.1	0.0	43.0	0	1.4166666666666667	0.28254658996996806
Chr1	386636	387708	mRNA	-	VDAG_JR2_Chr1g00960.1	0.0	43.0	0	1.5454545454545454	0.31078983295313745
Chr1	387814	390164	mRNA	-	VDAG_JR2_Chr1g00970.1	0.0	43.0	0	0.16666666666666666	-0.17609125905568127
Chr1	391300	392971	mRNA	-	VDAG_JR2_Chr1g00980.1	0.0	43.0	0	0.23529411764705882	-0.13353890837021748
Chr1	393481	394716	mRNA	+	VDAG_JR2_Chr1g00990.1	0.0	43.0	0	0.0	-0.3010299956639812
Chr1	394190	395073	mRNA	-	VDAG_JR2_Chr1g01000.1	0.0	43.0	0	0.0	-0.3010299956639812
Chr1	395271	396111	mRNA	-	VDAG_JR2_Chr1g01010.1	0.0	43.0	0	0.0	-0.3010299956639812
Chr1	397174	398540	mRNA	-	VDAG_JR2_Chr1g01020.1	0.0	43.0	0	0.0	-0.3010299956639812
Chr1	400559	402175	mRNA	+	VDAG_JR2_Chr1g01030.1	0.0	43.0	0	1.0	0.17609125905568124
Chr1	402185	404689	mRNA	-	VDAG_JR2_Chr1g01040.1	0.0	43.0	0	0.0	-0.3010299956639812
Chr1	407700	411490	mRNA	+	VDAG_JR2_Chr1g01050.1	0.0	43.0	0	0.0	-0.3010299956639812
Chr1	411664	413590	mRNA	+	VDAG_JR2_Chr1g01060.1	0.0	43.0	0	0.0	-0.3010299956639812
Chr1	414056	416022	mRNA	+	VDAG_JR2_Chr1g01070.1	0.0	43.0	0	0.0	-0.3010299956639812
Chr1	417164	418961	mRNA	+	VDAG_JR2_Chr1g01080.1	0.0	43.0	0	0.0	-0.3010299956639812
Chr1	421093	422933	mRNA	+	VDAG_JR2_Chr1g01090.1	0.0	43.0	0	0.0	-0.3010299956639812
Chr1	423071	425233	mRNA	-	VDAG_JR2_Chr1g01100.1	0.0	43.0	0	0.0	-0.3010299956639812
Chr1	425891	429673	mRNA	-	VDAG_JR2_Chr1g01110.1	0.0	43.0	0	0.0	-0.3010299956639812
Chr1	429834	431626	mRNA	+	VDAG_JR2_Chr1g01120.1	0.0	43.0	0	0.0	-0.3010299956639812
Chr1	432173	435468	mRNA	+	VDAG_JR2_Chr1g01130.1	0.0	43.0	0	0.6363636363636364	0.05551732784983133
Chr1	435497	439263	mRNA	-	VDAG_JR2_Chr1g01140.1	0.0	43.0	0	0.0	-0.3010299956639812
Chr1	443529	444628	mRNA	+	VDAG_JR2_Chr1g01150.1	0.0	43.0	0	0.0	-0.3010299956639812
Chr1	445196	449969	mRNA	+	VDAG_JR2_Chr1g01160.1	0.0	43.0	0	0.25	-0.12493873660829995
Chr1	450056	452982	mRNA	-	VDAG_JR2_Chr1g01170.1	0.0	43.0	0	1.5517241379310345	0.31211896782959353
Chr1	453362	457668	mRNA	-	VDAG_JR2_Chr1g01180.1	0.0	43.0	0	0.0	-0.3010299956639812
Chr1	458059	461345	mRNA	+	VDAG_JR2_Chr1g01190.1	0.0	43.0	0	0.0	-0.3010299956639812
Chr1	470614	472257	mRNA	+	VDAG_JR2_Chr1g01200.1	5.0	37.0	0	5.294117647058823	0.7629873091193378
Chr1	483748	484675	mRNA	-	VDAG_JR2_Chr1g01210.1	5.0	37.0	0	5.3	0.7634279935629372
Chr1	485268	486669	mRNA	-	VDAG_JR2_Chr1g01220.1	0.0	43.0	0	0.0	-0.3010299956639812
Chr1	488247	491291	mRNA	-	VDAG_JR2_Chr1g01230.1	0.0	43.0	0	0.0	-0.3010299956639812
Chr1	491291	492149	mRNA	-	VDAG_JR2_Chr1g01240.1	0.0	43.0	0	0.0	-0.3010299956639812
Chr1	492591	494900	mRNA	+	VDAG_JR2_Chr1g01250.1	0.0	43.0	0	0.34782608695652173	-0.07169322465507487
Chr1	494549	495630	mRNA	-	VDAG_JR2_Chr1g01260.1	0.0	43.0	0	0.0	-0.3010299956639812
Chr1	495693	496695	mRNA	+	VDAG_JR2_Chr1g01270.1	0.0	43.0	0	0.0	-0.3010299956639812
Chr1	496833	498857	mRNA	-	VDAG_JR2_Chr1g01280.1	0.0	43.0	0	0.0	-0.3010299956639812
Chr1	499460	504332	mRNA	-	VDAG_JR2_Chr1g01290.1	0.0	43.0	0	0.0	-0.3010299956639812
Chr1	504397	506100	mRNA	+	VDAG_JR2_Chr1g01300.1	0.0	43.0	0	0.0	-0.3010299956639812
Chr1	506748	507533	mRNA	+	VDAG_JR2_Chr1g01310.1	0.0	43.0	0	0.0	-0.3010299956639812
Chr1	507518	509531	mRNA	-	VDAG_JR2_Chr1g01320.1	0.0	43.0	0	0.15	-0.18708664335714442
Chr1	510123	511901	mRNA	+	VDAG_JR2_Chr1g01330.1	0.0	43.0	0	0.0	-0.3010299956639812
Chr1	513659	517110	mRNA	+	VDAG_JR2_Chr1g01340.1	0.0	43.0	0	0.0	-0.3010299956639812
Chr1	516904	519395	mRNA	-	VDAG_JR2_Chr1g01350.1	0.0	43.0	0	0.0	-0.3010299956639812
Chr1	519538	523891	mRNA	+	VDAG_JR2_Chr1g01360.1	0.0	43.0	0	0.022727272727272728	-0.2817248404685946
Chr1	523936	524576	mRNA	-	VDAG_JR2_Chr1g01370.1	0.0	43.0	0	0.0	-0.3010299956639812
Chr1	524813	528138	mRNA	+	VDAG_JR2_Chr1g01380.1	0.0	43.0	0	0.12121212121212122	-0.20676007882213318
Chr1	528252	529934	mRNA	+	VDAG_JR2_Chr1g01390.1	0.0	43.0	0	0.25	-0.12493873660829995
Chr1	529747	530826	mRNA	-	VDAG_JR2_Chr1g01400.1	0.0	43.0	0	0.0	-0.3010299956639812
Chr1	530805	531626	mRNA	-	VDAG_JR2_Chr1g01410.1	0.0	43.0	0	0.0	-0.3010299956639812
Chr1	532630	533747	mRNA	+	VDAG_JR2_Chr1g01420.1	0.0	43.0	0	0.0	-0.3010299956639812
Chr1	536036	538406	mRNA	-	VDAG_JR2_Chr1g01430.1	0.0	43.0	0	0.0	-0.3010299956639812
Chr1	539697	542045	mRNA	+	VDAG_JR2_Chr1g01440.1	0.0	43.0	0	0.08695652173913043	-0.23139406752258682
Chr1	683015	684301	mRNA	+	VDAG_JR2_Chr1g01450.1	1.0	41.0	0	0.07692307692307693	-0.23888208891513676
Chr1	684316	687190	mRNA	-	VDAG_JR2_Chr1g01460.1	0.0	43.0	0	0.0	-0.3010299956639812
Chr1	687407	690063	mRNA	+	VDAG_JR2_Chr1g01470.1	0.0	43.0	0	0.0	-0.3010299956639812
Chr1	690672	693421	mRNA	-	VDAG_JR2_Chr1g01480.1	0.0	43.0	0	0.0	-0.3010299956639812
Chr1	693945	695748	mRNA	-	VDAG_JR2_Chr1g01490.1	0.0	43.0	0	0.0	-0.3010299956639812
Chr1	695933	698501	mRNA	-	VDAG_JR2_Chr1g01500.1	0.0	43.0	0	0.0	-0.3010299956639812
Chr1	698625	700550	mRNA	-	VDAG_JR2_Chr1g01510.1	0.0	43.0	0	0.0	-0.3010299956639812
Chr1	701776	703909	mRNA	-	VDAG_JR2_Chr1g01520.1	0.0	43.0	0	0.0	-0.3010299956639812
Chr1	707107	710218	mRNA	-	VDAG_JR2_Chr1g01530.1	0.0	43.0	0	0.0	-0.3010299956639812
Chr1	709732	710940	mRNA	-	VDAG_JR2_Chr1g01540.1	0.0	43.0	0	0.0	-0.3010299956639812
Chr1	711204	714701	mRNA	+	VDAG_JR2_Chr1g01550.1	0.0	43.0	0	0.17142857142857143	-0.17300018207853932
Chr1	715098	717733	mRNA	+	VDAG_JR2_Chr1g01560.1	0.0	43.0	0	1.6153846153846154	0.3253893415234259
Chr1	717378	718953	mRNA	-	VDAG_JR2_Chr1g01570.1	0.0	43.0	0	0.8125	0.11809931207799448
Chr1	719341	723984	mRNA	+	VDAG_JR2_Chr1g01580.1	0.0	43.0	0	0.0	-0.3010299956639812
Chr1	724196	725161	mRNA	+	VDAG_JR2_Chr1g01590.1	0.0	43.0	0	0.4	-0.045757490560675115
Chr1	726057	727325	mRNA	+	VDAG_JR2_Chr1g01600.1	0.0	43.0	0	0.0	-0.3010299956639812
Chr1	727657	730741	mRNA	-	VDAG_JR2_Chr1g01610.1	0.0	43.0	0	1.1333333333333333	0.21307482530885122
Chr1	729953	730618	mRNA	+	VDAG_JR2_Chr1g01620.1	0.0	43.0	0	2.8333333333333335	0.5228787452803376
Chr1	755397	757245	mRNA	+	VDAG_JR2_Chr1g01630.1	0.0	43.0	0	0.0	-0.3010299956639812
Chr1	757635	761735	mRNA	+	VDAG_JR2_Chr1g01640.1	0.0	43.0	0	0.12195121951219512	-0.20624367628578033
Chr1	761405	765295	mRNA	-	VDAG_JR2_Chr1g01650.1	0.0	43.0	0	1.5897435897435896	0.3200930017134773
Chr1	765370	766834	mRNA	+	VDAG_JR2_Chr1g01660.1	0.0	43.0	0	1.9285714285714286	0.38535088136401713
Chr1	767276	771835	mRNA	+	VDAG_JR2_Chr1g01670.1	0.0	43.0	0	0.7333333333333333	0.09108046934733258
Chr1	771928	774677	mRNA	-	VDAG_JR2_Chr1g01680.1	0.0	43.0	0	0.5	0.0
Chr1	775905	776737	mRNA	+	VDAG_JR2_Chr1g01690.1	0.0	43.0	0	0.0	-0.3010299956639812
Chr1	776745	778611	mRNA	+	VDAG_JR2_Chr1g01700.1	0.0	43.0	0	0.0	-0.3010299956639812
Chr1	780009	781541	mRNA	-	VDAG_JR2_Chr1g01710.1	0.0	43.0	0	0.0	-0.3010299956639812
Chr1	781902	783565	mRNA	+	VDAG_JR2_Chr1g01720.1	0.0	43.0	0	2.4705882352941178	0.47284245674038744
Chr1	783460	786409	mRNA	-	VDAG_JR2_Chr1g01730.1	0.0	43.0	0	0.0	-0.3010299956639812
Chr1	786474	788227	mRNA	+	VDAG_JR2_Chr1g01740.1	0.0	43.0	0	0.5882352941176471	0.03672280702473993
Chr1	788056	789009	mRNA	+	VDAG_JR2_Chr1g01750.1	0.0	43.0	0	1.5555555555555556	0.31292921896368886
Chr1	789077	790156	mRNA	-	VDAG_JR2_Chr1g01760.1	2.0	40.0	0	5.181818181818182	0.7544873321858502
Chr1	790172	794918	mRNA	-	VDAG_JR2_Chr1g01770.1	0.0	43.0	0	0.0	-0.3010299956639812
Chr1	795491	798934	mRNA	-	VDAG_JR2_Chr1g01780.1	0.0	43.0	0	0.0	-0.3010299956639812
Chr1	799196	801660	mRNA	+	VDAG_JR2_Chr1g01790.1	0.0	43.0	0	0.0	-0.3010299956639812
Chr1	802513	803025	mRNA	+	VDAG_JR2_Chr1g01800.1	0.0	43.0	0	3.8	0.6334684555795865
Chr1	803067	806406	mRNA	-	VDAG_JR2_Chr1g01810.1	0.0	43.0	0	0.15151515151515152	-0.18607547996228216
Chr1	806845	807528	mRNA	-	VDAG_JR2_Chr1g01820.1	0.0	43.0	0	0.0	-0.3010299956639812
Chr1	807849	810765	mRNA	+	VDAG_JR2_Chr1g01830.1	0.0	43.0	0	0.1	-0.2218487496163564
Chr1	811303	811937	mRNA	-	VDAG_JR2_Chr1g01840.1	0.0	43.0	0	0.0	-0.3010299956639812
Chr1	812920	814391	mRNA	+	VDAG_JR2_Chr1g01850.1	0.0	43.0	0	0.0	-0.3010299956639812
Chr1	815432	817543	mRNA	-	VDAG_JR2_Chr1g01860.1	3.0	39.0	0	26.142857142857142	1.4255807961304496
Chr1	818175	819650	mRNA	+	VDAG_JR2_Chr1g01870.1	0.0	43.0	0	0.0	-0.3010299956639812
Chr1	819716	821007	mRNA	+	VDAG_JR2_Chr1g01880.1	0.0	43.0	0	0.07692307692307693	-0.23888208891513676
Chr1	821204	822015	mRNA	+	VDAG_JR2_Chr1g01890.1	0.0	43.0	0	0.0	-0.3010299956639812
Chr1	823708	826377	mRNA	-	VDAG_JR2_Chr1g01900.1	0.0	43.0	0	0.1111111111111111	-0.21387981994508098
Chr1	826418	828959	mRNA	-	VDAG_JR2_Chr1g01910.1	0.0	43.0	0	0.0	-0.3010299956639812
Chr1	829683	832465	mRNA	-	VDAG_JR2_Chr1g01920.1	0.0	43.0	0	0.0	-0.3010299956639812
Chr1	832984	834672	mRNA	+	VDAG_JR2_Chr1g01930.1	0.0	43.0	0	0.0	-0.3010299956639812
Chr1	834911	836789	mRNA	+	VDAG_JR2_Chr1g01940.1	0.0	43.0	0	0.0	-0.3010299956639812
Chr1	837874	839108	mRNA	-	VDAG_JR2_Chr1g01950.1	0.0	43.0	0	0.0	-0.3010299956639812
Chr1	839476	844222	mRNA	+	VDAG_JR2_Chr1g01960.1	0.0	43.0	0	0.0	-0.3010299956639812
Chr1	844209	846957	mRNA	-	VDAG_JR2_Chr1g01970.1	0.0	43.0	0	0.0	-0.3010299956639812
Chr1	847149	848076	mRNA	+	VDAG_JR2_Chr1g01980.1	0.0	43.0	0	0.0	-0.3010299956639812
Chr1	848108	852169	mRNA	-	VDAG_JR2_Chr1g01990.1	0.0	43.0	0	0.0	-0.3010299956639812
Chr1	852371	853954	mRNA	+	VDAG_JR2_Chr1g02000.1	0.0	43.0	0	0.0	-0.3010299956639812
Chr1	854078	855676	mRNA	+	VDAG_JR2_Chr1g02010.1	0.0	43.0	0	0.0	-0.3010299956639812
Chr1	856012	857068	mRNA	-	VDAG_JR2_Chr1g02020.1	0.0	43.0	0	0.0	-0.3010299956639812
Chr1	857929	858214	mRNA	+	VDAG_JR2_Chr1g02030.1	0.0	43.0	0	0.0	-0.3010299956639812
Chr1	858658	860056	mRNA	-	VDAG_JR2_Chr1g02040.1	0.0	43.0	0	0.0	-0.3010299956639812
Chr1	860370	862115	mRNA	+	VDAG_JR2_Chr1g02050.1	0.0	43.0	0	0.0	-0.3010299956639812
Chr1	862830	866049	mRNA	-	VDAG_JR2_Chr1g02060.1	0.0	43.0	0	0.0	-0.3010299956639812
Chr1	869574	870497	mRNA	+	VDAG_JR2_Chr1g02070.1	0.0	43.0	0	0.0	-0.3010299956639812
Chr1	871348	872115	mRNA	+	VDAG_JR2_Chr1g02080.1	0.0	43.0	0	1.625	0.32735893438633035
Chr1	872101	874574	mRNA	-	VDAG_JR2_Chr1g02090.1	12.0	30.0	0	5.32	0.7649229846498885
Chr1	874695	875132	mRNA	-	VDAG_JR2_Chr1g02100.1	9.0	33.0	0	4.5	0.6989700043360189
Chr1	875400	877627	mRNA	-	VDAG_JR2_Chr1g02110.1	0.0	43.0	0	0.9545454545454546	0.16272729749769976
Chr1	877951	880737	mRNA	+	VDAG_JR2_Chr1g02120.1	0.0	43.0	0	0.0	-0.3010299956639812
Chr1	880913	882260	mRNA	+	VDAG_JR2_Chr1g02130.1	0.0	43.0	0	3.357142857142857	0.5862657241447304
Chr1	882263	884815	mRNA	-	VDAG_JR2_Chr1g02140.1	0.0	43.0	0	0.0	-0.3010299956639812
Chr1	886921	887921	mRNA	-	VDAG_JR2_Chr1g02150.1	0.0	43.0	0	0.0	-0.3010299956639812
Chr1	888456	890472	mRNA	+	VDAG_JR2_Chr1g02160.1	0.0	43.0	0	0.0	-0.3010299956639812
Chr1	890578	892380	mRNA	+	VDAG_JR2_Chr1g02170.1	0.0	43.0	0	0.05555555555555555	-0.25527250510330607
Chr1	892849	893436	mRNA	-	VDAG_JR2_Chr1g02180.1	0.0	43.0	0	0.0	-0.3010299956639812
Chr1	893825	897736	mRNA	-	VDAG_JR2_Chr1g02190.1	0.0	43.0	0	0.07692307692307693	-0.23888208891513676
Chr1	898862	905421	mRNA	-	VDAG_JR2_Chr1g02200.1	0.0	43.0	0	2.076923076923077	0.4111014547300085
Chr1	906257	909288	mRNA	-	VDAG_JR2_Chr1g02210.1	0.0	43.0	0	0.0	-0.3010299956639812
Chr1	909612	912169	mRNA	-	VDAG_JR2_Chr1g02220.1	0.0	43.0	0	0.07692307692307693	-0.23888208891513676
Chr1	913040	915789	mRNA	+	VDAG_JR2_Chr1g02230.1	0.0	43.0	0	0.0	-0.3010299956639812
Chr1	915929	920553	mRNA	+	VDAG_JR2_Chr1g02240.1	0.0	43.0	0	0.44680851063829785	-0.023737846954785886
Chr1	920602	921619	mRNA	-	VDAG_JR2_Chr1g02250.1	1.0	41.0	0	4.9	0.7323937598229685
Chr1	921927	924106	mRNA	+	VDAG_JR2_Chr1g02260.1	0.0	43.0	0	1.0909090909090908	0.2016453635280694
Chr1	924345	925604	mRNA	+	VDAG_JR2_Chr1g02270.1	0.0	43.0	0	6.153846153846154	0.8230727551579775
Chr1	927868	930628	mRNA	-	VDAG_JR2_Chr1g02280.1	0.0	43.0	0	0.8888888888888888	0.14266750356873154
Chr1	931028	932534	mRNA	+	VDAG_JR2_Chr1g02290.1	0.0	43.0	0	1.3333333333333333	0.2632414347745814
Chr1	932640	937046	mRNA	-	VDAG_JR2_Chr1g02300.1	0.0	43.0	0	0.0	-0.3010299956639812
Chr1	938670	940537	mRNA	+	VDAG_JR2_Chr1g02310.1	0.0	43.0	0	0.0	-0.3010299956639812
Chr1	940861	942548	mRNA	+	VDAG_JR2_Chr1g02320.1	0.0	43.0	0	0.0	-0.3010299956639812
Chr1	942396	944753	mRNA	-	VDAG_JR2_Chr1g02330.1	0.0	43.0	0	0.0	-0.3010299956639812
Chr1	945857	947026	mRNA	+	VDAG_JR2_Chr1g02340.1	0.0	43.0	0	0.0	-0.3010299956639812
Chr1	947258	949737	mRNA	+	VDAG_JR2_Chr1g02350.1	0.0	43.0	0	0.0	-0.3010299956639812
Chr1	949674	950771	mRNA	+	VDAG_JR2_Chr1g02360.1	0.0	43.0	0	0.0	-0.3010299956639812
Chr1	950958	953583	mRNA	+	VDAG_JR2_Chr1g02370.1	0.0	43.0	0	0.6153846153846154	0.047424649928138135
Chr1	953850	956783	mRNA	-	VDAG_JR2_Chr1g02380.1	0.0	43.0	0	0.0	-0.3010299956639812
Chr1	959481	962732	mRNA	-	VDAG_JR2_Chr1g02390.1	0.0	43.0	0	0.0	-0.3010299956639812
Chr1	962921	966599	mRNA	-	VDAG_JR2_Chr1g02400.1	0.0	43.0	0	0.0	-0.3010299956639812
Chr1	966793	968541	mRNA	+	VDAG_JR2_Chr1g02410.1	0.0	43.0	0	0.0	-0.3010299956639812
Chr1	969741	974558	mRNA	+	VDAG_JR2_Chr1g02420.1	0.0	43.0	0	0.0	-0.3010299956639812
Chr1	974598	975409	mRNA	-	VDAG_JR2_Chr1g02430.1	0.0	43.0	0	0.0	-0.3010299956639812
Chr1	975572	976470	mRNA	+	VDAG_JR2_Chr1g02440.1	0.0	43.0	0	0.0	-0.3010299956639812
Chr1	976596	977765	mRNA	-	VDAG_JR2_Chr1g02450.1	0.0	43.0	0	1.1666666666666667	0.2218487496163564
Chr1	978082	980066	mRNA	-	VDAG_JR2_Chr1g02460.1	0.0	43.0	0	0.0	-0.3010299956639812
Chr1	980523	985487	mRNA	-	VDAG_JR2_Chr1g02470.1	0.0	43.0	0	0.0	-0.3010299956639812
Chr1	986061	987598	mRNA	+	VDAG_JR2_Chr1g02480.1	0.0	43.0	0	0.9333333333333333	0.1563472008599241
Chr1	988685	990922	mRNA	+	VDAG_JR2_Chr1g02490.1	0.0	43.0	0	0.045454545454545456	-0.26324143477458145
Chr1	996235	997477	mRNA	+	VDAG_JR2_Chr1g02500.1	0.0	43.0	0	0.0	-0.3010299956639812
Chr1	997858	999943	mRNA	+	VDAG_JR2_Chr1g02510.1	0.0	43.0	0	0.0	-0.3010299956639812
Chr1	1000609	1004176	mRNA	+	VDAG_JR2_Chr1g02520.1	0.0	43.0	0	0.0	-0.3010299956639812
Chr1	1004259	1005522	mRNA	-	VDAG_JR2_Chr1g02530.1	0.0	43.0	0	0.0	-0.3010299956639812
Chr1	1005683	1008780	mRNA	+	VDAG_JR2_Chr1g02540.1	0.0	43.0	0	0.4838709677419355	-0.007061854487486835
Chr1	1009162	1010162	mRNA	-	VDAG_JR2_Chr1g02550.1	0.0	43.0	0	0.0	-0.3010299956639812
Chr1	1010510	1011605	mRNA	+	VDAG_JR2_Chr1g02560.1	0.0	43.0	0	0.0	-0.3010299956639812
Chr1	1011608	1013174	mRNA	-	VDAG_JR2_Chr1g02570.1	0.0	43.0	0	2.625	0.494850021680094
Chr1	1013316	1015365	mRNA	-	VDAG_JR2_Chr1g02580.1	0.0	43.0	0	0.0	-0.3010299956639812
Chr1	1015599	1017996	mRNA	+	VDAG_JR2_Chr1g02590.1	0.0	43.0	0	0.375	-0.057991946977686754
Chr1	1018087	1020191	mRNA	+	VDAG_JR2_Chr1g02600.1	1.0	41.0	0	0.09523809523809523	-0.22530928172586287
Chr1	1020193	1021848	mRNA	-	VDAG_JR2_Chr1g02610.1	0.0	43.0	0	0.0	-0.3010299956639812
Chr1	1022619	1023623	mRNA	-	VDAG_JR2_Chr1g02620.1	0.0	43.0	0	0.1	-0.2218487496163564
Chr1	1024857	1025728	mRNA	-	VDAG_JR2_Chr1g02630.1	0.0	43.0	0	0.125	-0.2041199826559248
Chr1	1025390	1026983	mRNA	-	VDAG_JR2_Chr1g02640.1	0.0	43.0	0	8.8125	0.9690662857563492
Chr1	1027717	1028787	mRNA	-	VDAG_JR2_Chr1g02650.1	0.0	43.0	0	0.5454545454545454	0.019305155195386624
Chr1	1028830	1031088	mRNA	+	VDAG_JR2_Chr1g02660.1	0.0	43.0	0	2.391304347826087	0.4610938092855117
Chr1	1031116	1032671	mRNA	-	VDAG_JR2_Chr1g02670.1	2.0	40.0	0	1.0	0.17609125905568124
Chr1	1032967	1035166	mRNA	-	VDAG_JR2_Chr1g02680.1	0.0	43.0	0	1.9090909090909092	0.3818531887785828
Chr1	1035524	1037776	mRNA	+	VDAG_JR2_Chr1g02690.1	11.0	31.0	0	0.7391304347826086	0.09311702399091731
Chr1	1037885	1041369	mRNA	-	VDAG_JR2_Chr1g02700.1	0.0	43.0	0	0.0	-0.3010299956639812
Chr1	1042672	1045923	mRNA	+	VDAG_JR2_Chr1g02710.1	0.0	43.0	0	0.0	-0.3010299956639812
Chr1	1046414	1048756	mRNA	-	VDAG_JR2_Chr1g02720.1	0.0	43.0	0	0.0	-0.3010299956639812
Chr1	1049079	1051604	mRNA	+	VDAG_JR2_Chr1g02730.1	0.0	43.0	0	1.04	0.18752072083646307
Chr1	1051654	1054772	mRNA	-	VDAG_JR2_Chr1g02740.1	0.0	43.0	0	0.0	-0.3010299956639812
Chr1	1055029	1057359	mRNA	-	VDAG_JR2_Chr1g02750.1	0.0	43.0	0	0.041666666666666664	-0.2662678894047693
Chr1	1057763	1059194	mRNA	+	VDAG_JR2_Chr1g02760.1	2.0	40.0	0	0.35714285714285715	-0.06694678963061317
Chr1	1059837	1064007	mRNA	+	VDAG_JR2_Chr1g02770.1	0.0	43.0	0	1.0238095238095237	0.1829306835859867
Chr1	1064698	1065941	mRNA	+	VDAG_JR2_Chr1g02780.1	0.0	43.0	0	1.8333333333333333	0.3679767852945943
Chr1	1066695	1067769	mRNA	-	VDAG_JR2_Chr1g02790.1	0.0	43.0	0	0.0	-0.3010299956639812
Chr1	1068507	1071953	mRNA	+	VDAG_JR2_Chr1g02800.1	2.0	40.0	0	0.42857142857142855	-0.03218468337140124
Chr1	1072295	1074145	mRNA	-	VDAG_JR2_Chr1g02810.1	0.0	43.0	0	1.1111111111111112	0.20712549279565004
Chr1	1074907	1076427	mRNA	+	VDAG_JR2_Chr1g02820.1	2.0	40.0	0	1.3333333333333333	0.2632414347745814
Chr1	1076606	1078339	mRNA	-	VDAG_JR2_Chr1g02830.1	0.0	43.0	0	4.823529411764706	0.7261996578269294
Chr1	1078381	1080329	mRNA	+	VDAG_JR2_Chr1g02840.1	0.0	43.0	0	3.473684210526316	0.5991933506763593
Chr1	1080003	1082668	mRNA	-	VDAG_JR2_Chr1g02850.1	1.0	41.0	0	0.037037037037037035	-0.2699957619240125
Chr1	1082623	1085296	mRNA	-	VDAG_JR2_Chr1g02860.1	0.0	43.0	0	1.2222222222222223	0.23608918873096663
Chr1	1085463	1087237	mRNA	-	VDAG_JR2_Chr1g02870.1	7.0	35.0	0	0.8235294117647058	0.12173359673308855
Chr1	1087474	1090650	mRNA	-	VDAG_JR2_Chr1g02880.1	0.0	43.0	0	0.03125	-0.27470105694163205
Chr1	1091165	1092528	mRNA	-	VDAG_JR2_Chr1g02890.1	0.0	43.0	0	0.0	-0.3010299956639812
Chr1	1093557	1098996	mRNA	-	VDAG_JR2_Chr1g02900.1	0.0	43.0	0	0.14814814814814814	-0.1883257154726929
Chr1	1098893	1100887	mRNA	-	VDAG_JR2_Chr1g02910.1	0.0	43.0	0	0.0	-0.3010299956639812
Chr1	1101775	1103178	mRNA	-	VDAG_JR2_Chr1g02920.1	12.0	30.0	0	9.642857142857142	1.0061603087048185
Chr1	1104119	1104912	mRNA	+	VDAG_JR2_Chr1g02930.1	0.0	43.0	0	0.0	-0.3010299956639812
Chr1	1105363	1106562	mRNA	+	VDAG_JR2_Chr1g02940.1	0.0	43.0	0	0.5833333333333334	0.034762106259212
Chr1	1107374	1109838	mRNA	+	VDAG_JR2_Chr1g02950.1	0.0	43.0	0	0.375	-0.057991946977686754
Chr1	1109648	1113876	mRNA	-	VDAG_JR2_Chr1g02960.1	0.0	43.0	0	0.0	-0.3010299956639812
Chr1	1116362	1118132	mRNA	-	VDAG_JR2_Chr1g02970.1	0.0	43.0	0	0.17647058823529413	-0.16975108102466221
Chr1	1118360	1120260	mRNA	-	VDAG_JR2_Chr1g02980.1	0.0	43.0	0	0.0	-0.3010299956639812
Chr1	1120732	1123199	mRNA	+	VDAG_JR2_Chr1g02990.1	0.0	43.0	0	0.04	-0.26760624017703144
Chr1	1126867	1129309	mRNA	+	VDAG_JR2_Chr1g03000.1	0.0	43.0	0	0.0	-0.3010299956639812
Chr1	1130099	1130976	mRNA	+	VDAG_JR2_Chr1g03010.1	0.0	43.0	0	0.1111111111111111	-0.21387981994508098
Chr1	1132227	1133267	mRNA	+	VDAG_JR2_Chr1g03020.1	0.0	43.0	0	0.7272727272727273	0.08894108333678108
Chr1	1133829	1134225	mRNA	+	VDAG_JR2_Chr1g03030.1	0.0	43.0	0	0.0	-0.3010299956639812
Chr1	1135199	1136614	mRNA	+	VDAG_JR2_Chr1g03040.1	0.0	43.0	0	0.0	-0.3010299956639812
Chr1	1136788	1137588	mRNA	-	VDAG_JR2_Chr1g03050.1	1.0	41.0	0	11.0	1.0606978403536116
Chr1	1138590	1140696	mRNA	+	VDAG_JR2_Chr1g03060.1	0.0	43.0	0	0.23809523809523808	-0.13188759656362775
Chr1	1140290	1141411	mRNA	-	VDAG_JR2_Chr1g03070.1	0.0	43.0	0	0.6363636363636364	0.05551732784983133
Chr1	1143356	1146064	mRNA	+	VDAG_JR2_Chr1g03080.1	1.0	41.0	0	1.6296296296296295	0.3283040805306432
Chr1	1145677	1146714	mRNA	-	VDAG_JR2_Chr1g03090.1	1.0	41.0	0	5.4	0.7708520116421442
Chr1	1147194	1151600	mRNA	-	VDAG_JR2_Chr1g03100.1	0.0	43.0	0	0.1590909090909091	-0.18105467858723137
Chr1	1147543	1147980	mRNA	+	VDAG_JR2_Chr1g03110.1	6.0	36.0	0	1.2	0.2304489213782739
Chr1	1151752	1157205	mRNA	+	VDAG_JR2_Chr1g03120.1	0.0	43.0	0	0.37037037037037035	-0.060295901887251056
Chr1	1157191	1158848	mRNA	-	VDAG_JR2_Chr1g03130.1	0.0	43.0	0	1.375	0.27300127206373764
Chr1	1159070	1160615	mRNA	+	VDAG_JR2_Chr1g03140.1	0.0	43.0	0	1.3333333333333333	0.2632414347745814
Chr1	1160758	1161687	mRNA	+	VDAG_JR2_Chr1g03150.1	2.0	40.0	0	4.0	0.6532125137753437
Chr1	1161731	1163120	mRNA	+	VDAG_JR2_Chr1g03160.1	0.0	43.0	0	4.5	0.6989700043360189
Chr1	1163243	1166752	mRNA	-	VDAG_JR2_Chr1g03170.1	0.0	43.0	0	0.0	-0.3010299956639812
Chr1	1174477	1176133	mRNA	+	VDAG_JR2_Chr1g03180.1	0.0	43.0	0	0.0	-0.3010299956639812
Chr1	1177504	1181017	mRNA	-	VDAG_JR2_Chr1g03190.1	0.0	43.0	0	0.0	-0.3010299956639812
Chr1	1181143	1183038	mRNA	+	VDAG_JR2_Chr1g03200.1	0.0	43.0	0	0.15789473684210525	-0.1818435879447725
Chr1	1183428	1189038	mRNA	-	VDAG_JR2_Chr1g03210.1	0.0	43.0	0	0.0	-0.3010299956639812
Chr1	1189415	1191110	mRNA	-	VDAG_JR2_Chr1g03220.1	0.0	43.0	0	0.0	-0.3010299956639812
Chr1	1192088	1194767	mRNA	+	VDAG_JR2_Chr1g03230.1	2.0	40.0	0	0.07407407407407407	-0.24103206598869584
Chr1	1195283	1196320	mRNA	-	VDAG_JR2_Chr1g03240.1	0.0	43.0	0	0.0	-0.3010299956639812
Chr1	1199257	1202400	mRNA	+	VDAG_JR2_Chr1g03250.1	0.0	43.0	0	0.0967741935483871	-0.22418996543125885
Chr1	1203413	1205309	mRNA	+	VDAG_JR2_Chr1g03260.1	0.0	43.0	0	0.0	-0.3010299956639812
Chr1	1205430	1207697	mRNA	-	VDAG_JR2_Chr1g03270.1	0.0	43.0	0	0.0	-0.3010299956639812
Chr1	1207880	1208917	mRNA	+	VDAG_JR2_Chr1g03280.1	0.0	43.0	0	0.0	-0.3010299956639812
Chr1	1208968	1210217	mRNA	-	VDAG_JR2_Chr1g03290.1	0.0	43.0	0	0.0	-0.3010299956639812
Chr1	1210376	1212637	mRNA	+	VDAG_JR2_Chr1g03300.1	0.0	43.0	0	0.0	-0.3010299956639812
Chr1	1212572	1213986	mRNA	-	VDAG_JR2_Chr1g03310.1	0.0	43.0	0	1.1428571428571428	0.21559980033935483
Chr1	1215675	1219989	mRNA	+	VDAG_JR2_Chr1g03320.1	0.0	43.0	0	0.0	-0.3010299956639812
Chr1	1219945	1222370	mRNA	-	VDAG_JR2_Chr1g03330.1	0.0	43.0	0	0.0	-0.3010299956639812
Chr1	1223607	1228337	mRNA	-	VDAG_JR2_Chr1g03340.1	0.0	43.0	0	0.0	-0.3010299956639812
Chr1	1229603	1230537	mRNA	+	VDAG_JR2_Chr1g03350.1	0.0	43.0	0	0.0	-0.3010299956639812
Chr1	1231071	1232796	mRNA	+	VDAG_JR2_Chr1g03360.1	0.0	43.0	0	0.0	-0.3010299956639812
Chr1	1232801	1233448	mRNA	-	VDAG_JR2_Chr1g03370.1	0.0	43.0	0	0.0	-0.3010299956639812
Chr1	1233646	1237597	mRNA	+	VDAG_JR2_Chr1g03380.1	0.0	43.0	0	0.0	-0.3010299956639812
Chr1	1239124	1241352	mRNA	+	VDAG_JR2_Chr1g03390.1	0.0	43.0	0	0.0	-0.3010299956639812
Chr1	1241901	1243962	mRNA	+	VDAG_JR2_Chr1g03400.1	0.0	43.0	0	0.0	-0.3010299956639812
Chr1	1244351	1246021	mRNA	+	VDAG_JR2_Chr1g03410.1	0.0	43.0	0	0.0	-0.3010299956639812
Chr1	1245869	1247796	mRNA	-	VDAG_JR2_Chr1g03420.1	0.0	43.0	0	0.10526315789473684	-0.21805576059921727
Chr1	1248046	1249230	mRNA	-	VDAG_JR2_Chr1g03430.1	0.0	43.0	0	0.0	-0.3010299956639812
Chr1	1249531	1251499	mRNA	+	VDAG_JR2_Chr1g03440.1	0.0	43.0	0	0.15	-0.18708664335714442
Chr1	1250981	1255113	mRNA	-	VDAG_JR2_Chr1g03450.1	0.0	43.0	0	0.0	-0.3010299956639812
Chr1	1255307	1256367	mRNA	+	VDAG_JR2_Chr1g03460.1	0.0	43.0	0	0.0	-0.3010299956639812
Chr1	1259880	1263664	mRNA	+	VDAG_JR2_Chr1g03470.1	0.0	43.0	0	0.0	-0.3010299956639812
Chr1	1263759	1267554	mRNA	-	VDAG_JR2_Chr1g03480.1	0.0	43.0	0	0.0	-0.3010299956639812
Chr1	1268283	1269390	mRNA	-	VDAG_JR2_Chr1g03490.1	0.0	43.0	0	0.0	-0.3010299956639812
Chr1	1270497	1273691	mRNA	-	VDAG_JR2_Chr1g03500.1	0.0	43.0	0	0.0	-0.3010299956639812
Chr1	1277592	1278182	mRNA	-	VDAG_JR2_Chr1g03510.1	0.0	43.0	0	0.0	-0.3010299956639812
Chr1	1279845	1280343	mRNA	+	VDAG_JR2_Chr1g03520.1	0.0	43.0	0	0.0	-0.3010299956639812
Chr1	1281796	1283534	mRNA	-	VDAG_JR2_Chr1g03530.1	0.0	43.0	0	0.0	-0.3010299956639812
Chr1	1283653	1286695	mRNA	+	VDAG_JR2_Chr1g03540.1	0.0	43.0	0	0.0	-0.3010299956639812
Chr1	1288181	1291681	mRNA	+	VDAG_JR2_Chr1g03550.1	0.0	43.0	0	0.0	-0.3010299956639812
Chr1	1294614	1295858	mRNA	+	VDAG_JR2_Chr1g03560.1	0.0	43.0	0	0.0	-0.3010299956639812
Chr1	1296999	1298266	mRNA	-	VDAG_JR2_Chr1g03570.1	0.0	43.0	0	0.07692307692307693	-0.23888208891513676
Chr1	1298892	1300568	mRNA	+	VDAG_JR2_Chr1g03580.1	0.0	43.0	0	0.0	-0.3010299956639812
Chr1	1302799	1305258	mRNA	+	VDAG_JR2_Chr1g03590.1	0.0	43.0	0	0.0	-0.3010299956639812
Chr1	1305340	1306656	mRNA	-	VDAG_JR2_Chr1g03600.1	0.0	43.0	0	5.214285714285714	0.7569619513137056
Chr1	1307653	1313132	mRNA	+	VDAG_JR2_Chr1g03610.1	0.0	43.0	0	0.0	-0.3010299956639812
Chr1	1314036	1315482	mRNA	+	VDAG_JR2_Chr1g03620.1	0.0	43.0	0	0.0	-0.3010299956639812
Chr1	1315506	1317150	mRNA	-	VDAG_JR2_Chr1g03630.1	0.0	43.0	0	0.0	-0.3010299956639812
Chr1	1319568	1323299	mRNA	+	VDAG_JR2_Chr1g03640.1	4.0	38.0	0	0.4594594594594595	-0.01797337101190092
Chr1	1323829	1324800	mRNA	-	VDAG_JR2_Chr1g03650.1	0.0	43.0	0	0.0	-0.3010299956639812
Chr1	1324812	1325657	mRNA	-	VDAG_JR2_Chr1g03660.1	0.0	43.0	0	0.0	-0.3010299956639812
Chr1	1325996	1331878	mRNA	-	VDAG_JR2_Chr1g03670.1	0.0	43.0	0	0.0	-0.3010299956639812
Chr1	1333084	1335467	mRNA	+	VDAG_JR2_Chr1g03680.1	0.0	43.0	0	0.2916666666666667	-0.10145764075877702
Chr1	1335783	1338606	mRNA	-	VDAG_JR2_Chr1g03690.1	0.0	43.0	0	0.0	-0.3010299956639812
Chr1	1339624	1342751	mRNA	+	VDAG_JR2_Chr1g03700.1	0.0	43.0	0	0.03125	-0.27470105694163205
Chr1	1342735	1343834	mRNA	-	VDAG_JR2_Chr1g03710.1	0.0	43.0	0	0.0	-0.3010299956639812
Chr1	1344288	1346929	mRNA	-	VDAG_JR2_Chr1g03720.1	0.0	43.0	0	0.0	-0.3010299956639812
Chr1	1348928	1350375	mRNA	+	VDAG_JR2_Chr1g03730.1	0.0	43.0	0	0.0	-0.3010299956639812
Chr1	1350518	1351854	mRNA	-	VDAG_JR2_Chr1g03740.1	0.0	43.0	0	0.0	-0.3010299956639812
Chr1	1354079	1358141	mRNA	+	VDAG_JR2_Chr1g03750.1	0.0	43.0	0	0.0	-0.3010299956639812
Chr1	1359373	1360751	mRNA	+	VDAG_JR2_Chr1g03760.1	0.0	43.0	0	0.0	-0.3010299956639812
Chr1	1360667	1362898	mRNA	-	VDAG_JR2_Chr1g03770.1	0.0	43.0	0	0.0	-0.3010299956639812
Chr1	1364549	1367601	mRNA	+	VDAG_JR2_Chr1g03780.1	0.0	43.0	0	0.0	-0.3010299956639812
Chr1	1367786	1368724	mRNA	-	VDAG_JR2_Chr1g03790.1	0.0	43.0	0	0.1111111111111111	-0.21387981994508098
Chr1	1370258	1372408	mRNA	-	VDAG_JR2_Chr1g03800.1	0.0	43.0	0	0.0	-0.3010299956639812
Chr1	1372663	1373305	mRNA	+	VDAG_JR2_Chr1g03810.1	0.0	43.0	0	0.0	-0.3010299956639812
Chr1	1373667	1379550	mRNA	-	VDAG_JR2_Chr1g03820.1	0.0	43.0	0	0.0	-0.3010299956639812
Chr1	1380089	1381991	mRNA	-	VDAG_JR2_Chr1g03830.1	0.0	43.0	0	0.0	-0.3010299956639812
Chr1	1382490	1385519	mRNA	+	VDAG_JR2_Chr1g03840.1	0.0	43.0	0	0.0	-0.3010299956639812
Chr1	1385724	1387748	mRNA	-	VDAG_JR2_Chr1g03850.1	0.0	43.0	0	0.0	-0.3010299956639812
Chr1	1387993	1390979	mRNA	-	VDAG_JR2_Chr1g03860.1	0.0	43.0	0	0.0	-0.3010299956639812
Chr1	1391207	1393061	mRNA	+	VDAG_JR2_Chr1g03870.1	0.0	43.0	0	0.0	-0.3010299956639812
Chr1	1393315	1396008	mRNA	-	VDAG_JR2_Chr1g03880.1	0.0	43.0	0	0.0	-0.3010299956639812
Chr1	1396844	1401755	mRNA	-	VDAG_JR2_Chr1g03890.1	0.0	43.0	0	0.0	-0.3010299956639812
Chr1	1402026	1403586	mRNA	+	VDAG_JR2_Chr1g03900.1	0.0	43.0	0	0.0	-0.3010299956639812
Chr1	1403994	1405181	mRNA	+	VDAG_JR2_Chr1g03910.1	0.0	43.0	0	0.0	-0.3010299956639812
Chr1	1405878	1409466	mRNA	-	VDAG_JR2_Chr1g03920.1	0.0	43.0	0	0.0	-0.3010299956639812
Chr1	1409819	1411687	mRNA	-	VDAG_JR2_Chr1g03930.1	0.0	43.0	0	0.0	-0.3010299956639812
Chr1	1413232	1413870	mRNA	+	VDAG_JR2_Chr1g03940.1	0.0	43.0	0	0.0	-0.3010299956639812
Chr1	1414173	1415747	mRNA	-	VDAG_JR2_Chr1g03950.1	0.0	43.0	0	0.0	-0.3010299956639812
Chr1	1416739	1418807	mRNA	+	VDAG_JR2_Chr1g03960.1	0.0	43.0	0	0.0	-0.3010299956639812
Chr1	1419336	1421217	mRNA	+	VDAG_JR2_Chr1g03970.1	0.0	43.0	0	0.0	-0.3010299956639812
Chr1	1421893	1425352	mRNA	+	VDAG_JR2_Chr1g03980.1	0.0	43.0	0	0.0	-0.3010299956639812
Chr1	1426402	1434331	mRNA	+	VDAG_JR2_Chr1g03990.1	0.0	43.0	0	0.4050632911392405	-0.043321049489360844
Chr1	1432797	1433472	mRNA	-	VDAG_JR2_Chr1g04000.1	0.0	43.0	0	0.0	-0.3010299956639812
Chr1	1433477	1434331	mRNA	-	VDAG_JR2_Chr1g04010.1	10.0	32.0	0	3.375	0.5882717068423291
Chr1	1434785	1438026	mRNA	-	VDAG_JR2_Chr1g04020.1	0.0	43.0	0	0.0	-0.3010299956639812
Chr1	1438722	1441100	mRNA	+	VDAG_JR2_Chr1g04030.1	0.0	43.0	0	0.0	-0.3010299956639812
Chr1	1441603	1442070	mRNA	+	VDAG_JR2_Chr1g04040.1	0.0	43.0	0	2.2	0.43136376415898736
Chr1	1442308	1443602	mRNA	-	VDAG_JR2_Chr1g04050.1	0.0	43.0	0	0.0	-0.3010299956639812
Chr1	1443839	1445274	mRNA	-	VDAG_JR2_Chr1g04060.1	0.0	43.0	0	0.0	-0.3010299956639812
Chr1	1446029	1446883	mRNA	+	VDAG_JR2_Chr1g04070.1	0.0	43.0	0	1.1111111111111112	0.20712549279565004
Chr1	1447223	1449360	mRNA	-	VDAG_JR2_Chr1g04080.1	0.0	43.0	0	0.0	-0.3010299956639812
Chr1	1452777	1454013	mRNA	-	VDAG_JR2_Chr1g04090.1	0.0	43.0	0	0.0	-0.3010299956639812
Chr1	1456251	1457532	mRNA	+	VDAG_JR2_Chr1g04100.1	0.0	43.0	0	0.0	-0.3010299956639812
Chr1	1458030	1460775	mRNA	+	VDAG_JR2_Chr1g04110.1	0.0	43.0	0	0.21428571428571427	-0.146128035678238
Chr1	1461140	1463488	mRNA	-	VDAG_JR2_Chr1g04120.1	0.0	43.0	0	0.4166666666666667	-0.037788560889399754
Chr1	1464345	1469613	mRNA	+	VDAG_JR2_Chr1g04130.1	0.0	43.0	0	0.0	-0.3010299956639812
Chr1	1469925	1472520	mRNA	-	VDAG_JR2_Chr1g04140.1	0.0	43.0	0	0.0	-0.3010299956639812
Chr1	1474889	1476819	mRNA	-	VDAG_JR2_Chr1g04150.1	0.0	43.0	0	0.0	-0.3010299956639812
Chr1	1477158	1479357	mRNA	+	VDAG_JR2_Chr1g04160.1	0.0	43.0	0	0.0	-0.3010299956639812
Chr1	1480295	1483422	mRNA	+	VDAG_JR2_Chr1g04170.1	0.0	43.0	0	0.0	-0.3010299956639812
Chr1	1485516	1488389	mRNA	+	VDAG_JR2_Chr1g04180.1	0.0	43.0	0	0.5517241379310345	0.021901841447829747
Chr1	1488725	1489819	mRNA	-	VDAG_JR2_Chr1g04190.1	0.0	43.0	0	0.0	-0.3010299956639812
Chr1	1490790	1493189	mRNA	-	VDAG_JR2_Chr1g04200.1	0.0	43.0	0	0.125	-0.2041199826559248
Chr1	1493859	1496835	mRNA	-	VDAG_JR2_Chr1g04210.1	0.0	43.0	0	0.0	-0.3010299956639812
Chr1	1499790	1503225	mRNA	+	VDAG_JR2_Chr1g04220.1	15.0	27.0	0	1.1176470588235294	0.20888377245198872
Chr1	1503507	1504598	mRNA	+	VDAG_JR2_Chr1g04230.1	0.0	43.0	0	0.09090909090909091	-0.22847932851536945
Chr1	1505200	1510102	mRNA	+	VDAG_JR2_Chr1g04240.1	0.0	43.0	0	0.0	-0.3010299956639812
Chr1	1509995	1514089	mRNA	-	VDAG_JR2_Chr1g04250.1	0.0	43.0	0	0.0	-0.3010299956639812
Chr1	1515622	1517460	mRNA	-	VDAG_JR2_Chr1g04260.1	0.0	43.0	0	0.0	-0.3010299956639812
Chr1	1518259	1520883	mRNA	-	VDAG_JR2_Chr1g04270.1	0.0	43.0	0	0.0	-0.3010299956639812
Chr1	1523016	1525189	mRNA	+	VDAG_JR2_Chr1g04280.1	0.0	43.0	0	0.0	-0.3010299956639812
Chr1	1525080	1526744	mRNA	-	VDAG_JR2_Chr1g04290.1	0.0	43.0	0	0.0	-0.3010299956639812
Chr1	1527651	1528372	mRNA	-	VDAG_JR2_Chr1g04300.1	0.0	43.0	0	0.0	-0.3010299956639812
Chr1	1528768	1530318	mRNA	+	VDAG_JR2_Chr1g04310.1	0.0	43.0	0	0.0	-0.3010299956639812
Chr1	1531235	1532273	mRNA	+	VDAG_JR2_Chr1g04320.1	0.0	43.0	0	0.0	-0.3010299956639812
Chr1	1533731	1535869	mRNA	-	VDAG_JR2_Chr1g04330.1	0.0	43.0	0	0.0	-0.3010299956639812
Chr1	1536199	1537550	mRNA	+	VDAG_JR2_Chr1g04340.1	0.0	43.0	0	0.0	-0.3010299956639812
Chr1	1537550	1540072	mRNA	-	VDAG_JR2_Chr1g04350.1	0.0	43.0	0	0.19230769230769232	-0.1597008428675119
Chr1	1540347	1541447	mRNA	+	VDAG_JR2_Chr1g04360.1	0.0	43.0	0	0.9090909090909091	0.14893901301206647
Chr1	1542615	1545607	mRNA	+	VDAG_JR2_Chr1g04370.1	0.0	43.0	0	0.16666666666666666	-0.17609125905568127
Chr1	1546057	1548633	mRNA	-	VDAG_JR2_Chr1g04380.1	2.0	40.0	0	1.08	0.19865708695442263
Chr1	1548910	1552086	mRNA	+	VDAG_JR2_Chr1g04390.1	0.0	43.0	0	0.3125	-0.09017663034908802
Chr1	1552549	1553514	mRNA	-	VDAG_JR2_Chr1g04400.1	0.0	43.0	0	5.0	0.7403626894942439
Chr1	1553631	1557914	mRNA	-	VDAG_JR2_Chr1g04410.1	0.0	43.0	0	0.046511627906976744	-0.26240059330785026
Chr1	1558377	1559826	mRNA	-	VDAG_JR2_Chr1g04420.1	0.0	43.0	0	0.0	-0.3010299956639812
Chr1	1560316	1562041	mRNA	-	VDAG_JR2_Chr1g04430.1	0.0	43.0	0	0.0	-0.3010299956639812
Chr1	1563766	1565989	mRNA	+	VDAG_JR2_Chr1g04440.1	0.0	43.0	0	1.0	0.17609125905568124
Chr1	1566135	1568161	mRNA	-	VDAG_JR2_Chr1g04450.1	0.0	43.0	0	0.0	-0.3010299956639812
Chr1	1569454	1572060	mRNA	-	VDAG_JR2_Chr1g04460.1	0.0	43.0	0	0.15384615384615385	-0.18452442659254403
Chr1	1572402	1575041	mRNA	-	VDAG_JR2_Chr1g04470.1	0.0	43.0	0	0.07692307692307693	-0.23888208891513676
Chr1	1575312	1576465	mRNA	+	VDAG_JR2_Chr1g04480.1	0.0	43.0	0	0.08333333333333333	-0.23408320603336796
Chr1	1576437	1578085	mRNA	-	VDAG_JR2_Chr1g04490.1	0.0	43.0	0	0.6470588235294118	0.05958568998424405
Chr1	1578315	1586273	mRNA	-	VDAG_JR2_Chr1g04500.1	0.0	43.0	0	0.0	-0.3010299956639812
Chr1	1586931	1589669	mRNA	+	VDAG_JR2_Chr1g04510.1	0.0	43.0	0	0.0	-0.3010299956639812
Chr1	1589803	1591251	mRNA	-	VDAG_JR2_Chr1g04520.1	0.0	43.0	0	0.6666666666666666	0.06694678963061314
Chr1	1591849	1594225	mRNA	+	VDAG_JR2_Chr1g04530.1	0.0	43.0	0	0.2916666666666667	-0.10145764075877702
Chr1	1594191	1595898	mRNA	-	VDAG_JR2_Chr1g04540.1	0.0	43.0	0	0.0	-0.3010299956639812
Chr1	1596857	1598159	mRNA	+	VDAG_JR2_Chr1g04550.1	0.0	43.0	0	0.0	-0.3010299956639812
Chr1	1598672	1601134	mRNA	+	VDAG_JR2_Chr1g04560.1	0.0	43.0	0	0.0	-0.3010299956639812
Chr1	1601994	1602775	mRNA	+	VDAG_JR2_Chr1g04570.1	0.0	43.0	0	3.0	0.5440680443502757
Chr1	1603404	1605126	mRNA	+	VDAG_JR2_Chr1g04580.1	0.0	43.0	0	0.0	-0.3010299956639812
Chr1	1605412	1607719	mRNA	-	VDAG_JR2_Chr1g04590.1	0.0	43.0	0	0.21739130434782608	-0.14424389180368663
Chr1	1609460	1611625	mRNA	+	VDAG_JR2_Chr1g04600.1	0.0	43.0	0	0.19047619047619047	-0.1608512924989444
Chr1	1612656	1617139	mRNA	+	VDAG_JR2_Chr1g04610.1	0.0	43.0	0	0.0	-0.3010299956639812
Chr1	1616709	1617766	mRNA	-	VDAG_JR2_Chr1g04620.1	0.0	43.0	0	7.363636363636363	0.8956234223065892
Chr1	1618080	1620508	mRNA	+	VDAG_JR2_Chr1g04630.1	0.0	43.0	0	0.0	-0.3010299956639812
Chr1	1621789	1623680	mRNA	+	VDAG_JR2_Chr1g04640.1	0.0	43.0	0	0.0	-0.3010299956639812
Chr1	1624220	1626004	mRNA	+	VDAG_JR2_Chr1g04650.1	0.0	43.0	0	0.0	-0.3010299956639812
Chr1	1626685	1627110	mRNA	+	VDAG_JR2_Chr1g04660.1	0.0	43.0	0	0.0	-0.3010299956639812
Chr1	1627832	1629278	mRNA	+	VDAG_JR2_Chr1g04670.1	0.0	43.0	0	3.6666666666666665	0.619788758288394
Chr1	1629407	1631463	mRNA	-	VDAG_JR2_Chr1g04680.1	0.0	43.0	0	0.5714285714285714	0.029963223377443202
Chr1	1631676	1632788	mRNA	+	VDAG_JR2_Chr1g04690.1	3.0	39.0	0	3.090909090909091	0.5552044104682352
Chr1	1632713	1635954	mRNA	-	VDAG_JR2_Chr1g04700.1	0.0	43.0	0	0.0	-0.3010299956639812
Chr1	1636956	1638702	mRNA	+	VDAG_JR2_Chr1g04710.1	0.0	43.0	0	0.5882352941176471	0.03672280702473993
Chr1	1638699	1641501	mRNA	-	VDAG_JR2_Chr1g04720.1	0.0	43.0	0	0.0	-0.3010299956639812
Chr1	1642447	1643837	mRNA	+	VDAG_JR2_Chr1g04730.1	0.0	43.0	0	0.0	-0.3010299956639812
Chr1	1645633	1647727	mRNA	+	VDAG_JR2_Chr1g04740.1	0.0	43.0	0	0.0	-0.3010299956639812
Chr1	1647804	1648975	mRNA	-	VDAG_JR2_Chr1g04750.1	0.0	43.0	0	0.0	-0.3010299956639812
Chr1	1650214	1651515	mRNA	+	VDAG_JR2_Chr1g04760.1	0.0	43.0	0	0.0	-0.3010299956639812
Chr1	1652470	1653665	mRNA	+	VDAG_JR2_Chr1g04770.1	0.0	43.0	0	0.0	-0.3010299956639812
Chr1	1653969	1654818	mRNA	-	VDAG_JR2_Chr1g04780.1	0.0	43.0	0	0.0	-0.3010299956639812
Chr1	1654914	1655578	mRNA	+	VDAG_JR2_Chr1g04790.1	0.0	43.0	0	0.0	-0.3010299956639812
Chr1	1656453	1657457	mRNA	-	VDAG_JR2_Chr1g04800.1	0.0	43.0	0	0.0	-0.3010299956639812
Chr1	1661461	1662098	mRNA	-	VDAG_JR2_Chr1g04810.1	0.0	43.0	0	0.0	-0.3010299956639812
Chr1	1663193	1664086	mRNA	+	VDAG_JR2_Chr1g04820.1	0.0	43.0	0	0.0	-0.3010299956639812
Chr1	1664039	1664337	mRNA	+	VDAG_JR2_Chr1g04830.1	0.0	43.0	0	0.0	-0.3010299956639812
Chr1	1664697	1666032	mRNA	+	VDAG_JR2_Chr1g04840.1	0.0	43.0	0	0.23076923076923078	-0.13621974701798897
Chr1	1666281	1667348	mRNA	+	VDAG_JR2_Chr1g04850.1	0.0	43.0	0	0.0	-0.3010299956639812
Chr1	1668128	1671114	mRNA	-	VDAG_JR2_Chr1g04860.1	0.0	43.0	0	0.0	-0.3010299956639812
Chr1	1671205	1672226	mRNA	-	VDAG_JR2_Chr1g04870.1	0.0	43.0	0	0.0	-0.3010299956639812
Chr1	1672717	1674210	mRNA	+	VDAG_JR2_Chr1g04880.1	0.0	43.0	0	0.6666666666666666	0.06694678963061314
Chr1	1674377	1676186	mRNA	-	VDAG_JR2_Chr1g04890.1	0.0	43.0	0	0.5	0.0
Chr1	1676477	1677929	mRNA	-	VDAG_JR2_Chr1g04900.1	0.0	43.0	0	0.0	-0.3010299956639812
Chr1	1678075	1680189	mRNA	-	VDAG_JR2_Chr1g04910.1	0.0	43.0	0	0.0	-0.3010299956639812
Chr1	1680368	1681900	mRNA	+	VDAG_JR2_Chr1g04920.1	0.0	43.0	0	0.0	-0.3010299956639812
Chr1	1681757	1682779	mRNA	+	VDAG_JR2_Chr1g04930.1	0.0	43.0	0	0.0	-0.3010299956639812
Chr1	1682762	1683832	mRNA	-	VDAG_JR2_Chr1g04940.1	0.0	43.0	0	0.0	-0.3010299956639812
Chr1	1684508	1686665	mRNA	+	VDAG_JR2_Chr1g04950.1	0.0	43.0	0	0.0	-0.3010299956639812
Chr1	1686488	1687932	mRNA	-	VDAG_JR2_Chr1g04960.1	0.0	43.0	0	0.0	-0.3010299956639812
Chr1	1688323	1689709	mRNA	-	VDAG_JR2_Chr1g04970.1	0.0	43.0	0	0.0	-0.3010299956639812
Chr1	1690399	1692226	mRNA	+	VDAG_JR2_Chr1g04980.1	0.0	43.0	1	0.0	-0.3010299956639812
Chr1	1692622	1694000	mRNA	+	VDAG_JR2_Chr1g04990.1	0.0	43.0	1	0.0	-0.3010299956639812
Chr1	1696788	1697894	mRNA	+	VDAG_JR2_Chr1g05000.1	0.0	43.0	1	0.0	-0.3010299956639812
Chr1	1699397	1701820	mRNA	+	VDAG_JR2_Chr1g05010.1	0.0	43.0	1	0.0	-0.3010299956639812
Chr1	1702506	1703722	mRNA	+	VDAG_JR2_Chr1g05020.1	0.0	43.0	0	0.16666666666666666	-0.17609125905568127
Chr1	1703571	1706089	mRNA	-	VDAG_JR2_Chr1g05030.1	0.0	43.0	0	0.6	0.04139268515822508
Chr1	1706444	1708450	mRNA	+	VDAG_JR2_Chr1g05040.1	0.0	43.0	0	1.9047619047619047	0.3810720833847421
Chr1	1708433	1709504	mRNA	-	VDAG_JR2_Chr1g05050.1	0.0	43.0	0	0.0	-0.3010299956639812
Chr1	1709514	1710743	mRNA	-	VDAG_JR2_Chr1g05060.1	0.0	43.0	0	0.0	-0.3010299956639812
Chr1	1712547	1714169	mRNA	+	VDAG_JR2_Chr1g05070.1	0.0	43.0	0	0.0	-0.3010299956639812
Chr1	1715404	1716057	mRNA	+	VDAG_JR2_Chr1g05080.1	0.0	43.0	0	0.0	-0.3010299956639812
Chr1	1716018	1716728	mRNA	-	VDAG_JR2_Chr1g05090.1	0.0	43.0	0	0.0	-0.3010299956639812
Chr1	1716955	1719014	mRNA	-	VDAG_JR2_Chr1g05100.1	0.0	43.0	0	0.0	-0.3010299956639812
Chr1	1719331	1720252	mRNA	+	VDAG_JR2_Chr1g05110.1	0.0	43.0	0	0.0	-0.3010299956639812
Chr1	1721039	1723315	mRNA	+	VDAG_JR2_Chr1g05120.1	0.0	43.0	0	0.0	-0.3010299956639812
Chr1	1723409	1724709	mRNA	-	VDAG_JR2_Chr1g05130.1	0.0	43.0	0	0.0	-0.3010299956639812
Chr1	1725289	1729829	mRNA	-	VDAG_JR2_Chr1g05140.1	0.0	43.0	0	0.0	-0.3010299956639812
Chr1	1730035	1731856	mRNA	+	VDAG_JR2_Chr1g05150.1	0.0	43.0	0	0.42105263157894735	-0.035715552266534535
Chr1	1731847	1734934	mRNA	-	VDAG_JR2_Chr1g05160.1	0.0	43.0	0	0.0	-0.3010299956639812
Chr1	1735658	1737300	mRNA	+	VDAG_JR2_Chr1g05170.1	0.0	43.0	0	0.0	-0.3010299956639812
Chr1	1737550	1739669	mRNA	+	VDAG_JR2_Chr1g05180.1	0.0	43.0	0	0.09090909090909091	-0.22847932851536945
Chr1	1739589	1741248	mRNA	-	VDAG_JR2_Chr1g05190.1	0.0	43.0	0	0.0	-0.3010299956639812
Chr1	1741612	1745143	mRNA	+	VDAG_JR2_Chr1g05200.1	0.0	43.0	0	0.0	-0.3010299956639812
Chr1	1745904	1747363	mRNA	+	VDAG_JR2_Chr1g05210.1	0.0	43.0	0	4.266666666666667	0.6782147827453994
Chr1	1748034	1748866	mRNA	+	VDAG_JR2_Chr1g05220.1	0.0	43.0	0	0.2222222222222222	-0.14132915279646932
Chr1	1750650	1751531	mRNA	-	VDAG_JR2_Chr1g05230.1	2.0	40.0	0	2.0	0.3979400086720376
Chr1	1751689	1752548	mRNA	+	VDAG_JR2_Chr1g05240.1	0.0	43.0	0	4.125	0.6651117370750514
Chr1	1752659	1754069	mRNA	-	VDAG_JR2_Chr1g05250.1	0.0	43.0	0	0.0	-0.3010299956639812
Chr1	1755250	1756913	mRNA	-	VDAG_JR2_Chr1g05260.1	0.0	43.0	0	0.0	-0.3010299956639812
Chr1	1758021	1763605	mRNA	-	VDAG_JR2_Chr1g05270.1	0.0	43.0	0	0.0	-0.3010299956639812
Chr1	1763805	1764513	mRNA	-	VDAG_JR2_Chr1g05280.1	0.0	43.0	0	0.0	-0.3010299956639812
Chr1	1768378	1770207	mRNA	+	VDAG_JR2_Chr1g05290.1	0.0	43.0	0	0.0	-0.3010299956639812
Chr1	1770260	1772081	mRNA	-	VDAG_JR2_Chr1g05300.1	0.0	43.0	0	0.2222222222222222	-0.14132915279646932
Chr1	1772181	1773305	mRNA	+	VDAG_JR2_Chr1g05310.1	0.0	43.0	0	0.0	-0.3010299956639812
Chr1	1774270	1774917	mRNA	+	VDAG_JR2_Chr1g05320.1	0.0	43.0	0	0.0	-0.3010299956639812
Chr1	1776511	1778171	mRNA	+	VDAG_JR2_Chr1g05330.1	0.0	43.0	0	0.0	-0.3010299956639812
Chr1	1778288	1779289	mRNA	-	VDAG_JR2_Chr1g05340.1	0.0	43.0	0	0.0	-0.3010299956639812
Chr1	1781372	1783391	mRNA	-	VDAG_JR2_Chr1g05350.1	0.0	43.0	0	0.0	-0.3010299956639812
Chr1	1784638	1786465	mRNA	-	VDAG_JR2_Chr1g05360.1	0.0	43.0	0	0.3157894736842105	-0.08842190278253749
Chr1	1787288	1788125	mRNA	+	VDAG_JR2_Chr1g05370.1	0.0	43.0	0	0.0	-0.3010299956639812
Chr1	1788248	1789337	mRNA	-	VDAG_JR2_Chr1g05380.1	0.0	43.0	0	0.18181818181818182	-0.16633142176652496
Chr1	1790274	1791849	mRNA	+	VDAG_JR2_Chr1g05390.1	0.0	43.0	0	0.0	-0.3010299956639812
Chr1	1791887	1795078	mRNA	-	VDAG_JR2_Chr1g05400.1	0.0	43.0	0	0.0625	-0.2498774732165999
Chr1	1795826	1796991	mRNA	-	VDAG_JR2_Chr1g05410.1	0.0	43.0	0	0.0	-0.3010299956639812
Chr1	1797835	1799760	mRNA	+	VDAG_JR2_Chr1g05420.1	0.0	43.0	0	0.0	-0.3010299956639812
Chr1	1800029	1801079	mRNA	-	VDAG_JR2_Chr1g05430.1	0.0	43.0	0	0.0	-0.3010299956639812
Chr1	1802009	1803073	mRNA	-	VDAG_JR2_Chr1g05440.1	0.0	43.0	0	0.0	-0.3010299956639812
Chr1	1803897	1805160	mRNA	+	VDAG_JR2_Chr1g05450.1	0.0	43.0	0	0.0	-0.3010299956639812
Chr1	1805380	1806738	mRNA	-	VDAG_JR2_Chr1g05460.1	0.0	43.0	0	0.5384615384615384	0.01639041618816929
Chr1	1807164	1809135	mRNA	-	VDAG_JR2_Chr1g05470.1	0.0	43.0	0	0.0	-0.3010299956639812
Chr1	1809240	1812203	mRNA	+	VDAG_JR2_Chr1g05480.1	0.0	43.0	0	0.0	-0.3010299956639812
Chr1	1814145	1817330	mRNA	+	VDAG_JR2_Chr1g05490.1	0.0	43.0	0	0.0	-0.3010299956639812
Chr1	1817294	1818923	mRNA	-	VDAG_JR2_Chr1g05500.1	0.0	43.0	0	1.125	0.21085336531489318
Chr1	1819095	1821809	mRNA	+	VDAG_JR2_Chr1g05510.1	0.0	43.0	0	0.0	-0.3010299956639812
Chr1	1821925	1826089	mRNA	-	VDAG_JR2_Chr1g05520.1	0.0	43.0	0	0.023809523809523808	-0.2808266095756942
Chr1	1828467	1830566	mRNA	+	VDAG_JR2_Chr1g05530.1	0.0	43.0	0	0.0	-0.3010299956639812
Chr1	1830932	1833493	mRNA	+	VDAG_JR2_Chr1g05540.1	0.0	43.0	0	0.0	-0.3010299956639812
Chr1	1834639	1836483	mRNA	-	VDAG_JR2_Chr1g05550.1	0.0	43.0	0	1.0	0.17609125905568124
Chr1	1837347	1838984	mRNA	-	VDAG_JR2_Chr1g05560.1	0.0	43.0	0	0.35294117647058826	-0.069080919143299
Chr1	1839399	1842739	mRNA	+	VDAG_JR2_Chr1g05570.1	0.0	43.0	0	0.21212121212121213	-0.1474460776061512
Chr1	1843243	1845083	mRNA	+	VDAG_JR2_Chr1g05580.1	0.0	43.0	0	0.0	-0.3010299956639812
Chr1	1845062	1846926	mRNA	-	VDAG_JR2_Chr1g05590.1	0.0	43.0	0	0.0	-0.3010299956639812
Chr1	1847805	1849071	mRNA	-	VDAG_JR2_Chr1g05600.1	0.0	43.0	0	0.0	-0.3010299956639812
Chr1	1849439	1855674	mRNA	-	VDAG_JR2_Chr1g05610.1	0.0	43.0	0	0.0	-0.3010299956639812
Chr1	1855959	1856939	mRNA	+	VDAG_JR2_Chr1g05620.1	0.0	43.0	0	4.777777777777778	0.7224511001855417
Chr1	1857391	1858501	mRNA	-	VDAG_JR2_Chr1g05630.1	14.0	28.0	0	18.09090909090909	1.2693006271851355
Chr1	1859275	1861945	mRNA	-	VDAG_JR2_Chr1g05640.1	0.0	43.0	0	0.07692307692307693	-0.23888208891513676
Chr1	1864294	1865576	mRNA	+	VDAG_JR2_Chr1g05650.1	0.0	43.0	0	0.6923076923076923	0.0763883458634547
Chr1	1865889	1866797	mRNA	-	VDAG_JR2_Chr1g05660.1	0.0	43.0	0	0.0	-0.3010299956639812
Chr1	1868080	1869951	mRNA	-	VDAG_JR2_Chr1g05670.1	0.0	43.0	0	0.0	-0.3010299956639812
Chr1	1870946	1871983	mRNA	+	VDAG_JR2_Chr1g05680.1	0.0	43.0	0	0.0	-0.3010299956639812
Chr1	1872087	1874449	mRNA	-	VDAG_JR2_Chr1g05690.1	0.0	43.0	0	0.0	-0.3010299956639812
Chr1	1875035	1877623	mRNA	+	VDAG_JR2_Chr1g05700.1	0.0	43.0	0	0.0	-0.3010299956639812
Chr1	1877775	1878976	mRNA	-	VDAG_JR2_Chr1g05710.1	0.0	43.0	0	0.0	-0.3010299956639812
Chr1	1879178	1883254	mRNA	+	VDAG_JR2_Chr1g05720.1	0.0	43.0	0	0.24390243902439024	-0.12848401737294965
Chr1	1884382	1885676	mRNA	+	VDAG_JR2_Chr1g05730.1	0.0	43.0	0	0.0	-0.3010299956639812
Chr1	1887654	1888844	mRNA	+	VDAG_JR2_Chr1g05740.1	0.0	43.0	0	0.0	-0.3010299956639812
Chr1	1888822	1890667	mRNA	+	VDAG_JR2_Chr1g05750.1	0.0	43.0	0	0.0	-0.3010299956639812
Chr1	1890836	1894529	mRNA	+	VDAG_JR2_Chr1g05760.1	0.0	43.0	0	0.0	-0.3010299956639812
Chr1	1895058	1897064	mRNA	+	VDAG_JR2_Chr1g05770.1	0.0	43.0	0	0.25	-0.12493873660829995
Chr1	1897565	1899981	mRNA	-	VDAG_JR2_Chr1g05780.1	0.0	43.0	0	0.7083333333333334	0.08218675618735012
Chr1	1900258	1902699	mRNA	-	VDAG_JR2_Chr1g05790.1	0.0	43.0	0	0.0	-0.3010299956639812
Chr1	1905813	1909492	mRNA	+	VDAG_JR2_Chr1g05800.1	0.0	43.0	0	0.0	-0.3010299956639812
Chr1	1910249	1914140	mRNA	+	VDAG_JR2_Chr1g05810.1	0.0	43.0	0	0.41025641025641024	-0.04083625397140512
Chr1	1915154	1919478	mRNA	-	VDAG_JR2_Chr1g05820.1	2.0	40.0	0	0.23255813953488372	-0.13515790178998605
Chr1	1920074	1921313	mRNA	-	VDAG_JR2_Chr1g05830.1	0.0	43.0	0	0.0	-0.3010299956639812
Chr1	1922442	1923855	mRNA	+	VDAG_JR2_Chr1g05840.1	0.0	43.0	0	0.2	-0.1549019599857432
Chr1	1923986	1924916	mRNA	-	VDAG_JR2_Chr1g05850.1	0.0	43.0	0	0.0	-0.3010299956639812
Chr1	1925026	1926096	mRNA	+	VDAG_JR2_Chr1g05860.1	0.0	43.0	0	0.0	-0.3010299956639812
Chr1	1926485	1927494	mRNA	-	VDAG_JR2_Chr1g05870.1	0.0	43.0	0	0.0	-0.3010299956639812
Chr1	1928809	1930372	mRNA	+	VDAG_JR2_Chr1g05880.1	0.0	43.0	0	0.0	-0.3010299956639812
Chr1	1930464	1931444	mRNA	+	VDAG_JR2_Chr1g05890.1	0.0	43.0	0	0.0	-0.3010299956639812
Chr1	1931496	1933367	mRNA	-	VDAG_JR2_Chr1g05900.1	0.0	43.0	0	0.0	-0.3010299956639812
Chr1	1934244	1935778	mRNA	+	VDAG_JR2_Chr1g05910.1	0.0	43.0	0	0.0	-0.3010299956639812
Chr1	1936376	1938207	mRNA	-	VDAG_JR2_Chr1g05920.1	0.0	43.0	0	0.0	-0.3010299956639812
Chr1	1938317	1940354	mRNA	-	VDAG_JR2_Chr1g05930.1	0.0	43.0	0	0.3333333333333333	-0.07918124604762487
Chr1	1941630	1942586	mRNA	-	VDAG_JR2_Chr1g05940.1	0.0	43.0	0	0.0	-0.3010299956639812
Chr1	1944194	1944906	mRNA	+	VDAG_JR2_Chr1g05950.1	0.0	43.0	0	0.0	-0.3010299956639812
Chr1	1945022	1947429	mRNA	+	VDAG_JR2_Chr1g05960.1	0.0	43.0	0	1.5416666666666667	0.3099848383169077
Chr1	1947424	1948853	mRNA	-	VDAG_JR2_Chr1g05970.1	0.0	43.0	0	0.13333333333333333	-0.1983676537668335
Chr1	1949614	1950915	mRNA	+	VDAG_JR2_Chr1g05980.1	0.0	43.0	0	0.0	-0.3010299956639812
Chr1	1952810	1954733	mRNA	-	VDAG_JR2_Chr1g05990.1	0.0	43.0	0	1.0526315789473684	0.191068415025334
Chr1	1955066	1958143	mRNA	-	VDAG_JR2_Chr1g06000.1	0.0	43.0	0	0.0	-0.3010299956639812
Chr1	1958330	1959575	mRNA	+	VDAG_JR2_Chr1g06010.1	1.0	41.0	0	1.6923076923076923	0.3409015077016735
Chr1	1960254	1961462	mRNA	-	VDAG_JR2_Chr1g06020.1	0.0	43.0	0	3.3333333333333335	0.5835765856339493
Chr1	1963108	1963437	mRNA	+	VDAG_JR2_Chr1g06030.1	0.0	43.0	0	0.0	-0.3010299956639812
Chr1	1966321	1968778	mRNA	+	VDAG_JR2_Chr1g06040.1	1.0	41.0	0	0.16	-0.1804560644581313
Chr1	1969557	1970193	mRNA	+	VDAG_JR2_Chr1g06050.1	0.0	43.0	0	0.0	-0.3010299956639812
Chr1	1971075	1972934	mRNA	+	VDAG_JR2_Chr1g06060.1	0.0	43.0	0	0.05555555555555555	-0.25527250510330607
Chr1	1973397	1975859	mRNA	-	VDAG_JR2_Chr1g06070.1	0.0	43.0	0	5.04	0.7435097647284298
Chr1	1977018	1981418	mRNA	-	VDAG_JR2_Chr1g06080.1	4.0	38.0	0	0.11363636363636363	-0.21208891232720012
Chr1	1982381	1983102	mRNA	-	VDAG_JR2_Chr1g06090.1	0.0	43.0	0	0.0	-0.3010299956639812
Chr1	1983493	1985727	mRNA	-	VDAG_JR2_Chr1g06100.1	0.0	43.0	0	0.0	-0.3010299956639812
Chr1	1986432	1989268	mRNA	-	VDAG_JR2_Chr1g06110.1	0.0	43.0	0	0.0	-0.3010299956639812
Chr1	1990998	1992426	mRNA	-	VDAG_JR2_Chr1g06120.1	0.0	43.0	0	0.0	-0.3010299956639812
Chr1	1994605	1995502	mRNA	+	VDAG_JR2_Chr1g06130.1	0.0	43.0	0	1.2222222222222223	0.23608918873096663
Chr1	1996088	1998925	mRNA	-	VDAG_JR2_Chr1g06140.1	0.0	43.0	0	0.07142857142857142	-0.24303804868629447
Chr1	1999394	2001458	mRNA	-	VDAG_JR2_Chr1g06150.1	0.0	43.0	0	0.047619047619047616	-0.26152145438030755
Chr1	2003482	2006838	mRNA	+	VDAG_JR2_Chr1g06160.1	0.0	43.0	0	0.18181818181818182	-0.16633142176652496
Chr1	2006934	2010358	mRNA	+	VDAG_JR2_Chr1g06170.1	0.0	43.0	0	0.42857142857142855	-0.03218468337140124
Chr1	2010267	2011112	mRNA	-	VDAG_JR2_Chr1g06180.1	4.0	38.0	0	7.75	0.9164539485499251
Chr1	2011574	2012644	mRNA	+	VDAG_JR2_Chr1g06190.1	10.0	32.0	0	14.2	1.167317334748176
Chr1	2012763	2014122	mRNA	-	VDAG_JR2_Chr1g06200.1	0.0	43.0	0	0.0	-0.3010299956639812
Chr1	2016405	2017254	mRNA	+	VDAG_JR2_Chr1g06210.1	0.0	43.0	0	0.0	-0.3010299956639812
Chr1	2021432	2024382	mRNA	+	VDAG_JR2_Chr1g06220.1	0.0	43.0	0	0.0	-0.3010299956639812
Chr1	2024685	2026730	mRNA	-	VDAG_JR2_Chr1g06230.1	0.0	43.0	0	0.1	-0.2218487496163564
Chr1	2029157	2031719	mRNA	-	VDAG_JR2_Chr1g06240.1	0.0	43.0	0	0.08	-0.23657200643706275
Chr1	2034072	2035187	mRNA	+	VDAG_JR2_Chr1g06250.1	0.0	43.0	0	0.0	-0.3010299956639812
Chr1	2035333	2036531	mRNA	+	VDAG_JR2_Chr1g06260.1	0.0	43.0	0	0.0	-0.3010299956639812
Chr1	2036877	2039161	mRNA	-	VDAG_JR2_Chr1g06270.1	0.0	43.0	0	0.0	-0.3010299956639812
Chr1	2039843	2044453	mRNA	+	VDAG_JR2_Chr1g06280.1	0.0	43.0	0	0.0	-0.3010299956639812
Chr1	2045005	2046478	mRNA	+	VDAG_JR2_Chr1g06290.1	0.0	43.0	0	8.8	0.9684829485539351
Chr1	2046725	2047251	mRNA	-	VDAG_JR2_Chr1g06300.1	0.0	43.0	0	0.16666666666666666	-0.17609125905568127
Chr1	2047449	2048378	mRNA	+	VDAG_JR2_Chr1g06310.1	0.0	43.0	0	0.0	-0.3010299956639812
Chr1	2048329	2050197	mRNA	-	VDAG_JR2_Chr1g06320.1	0.0	43.0	0	0.0	-0.3010299956639812
Chr1	2051043	2053402	mRNA	-	VDAG_JR2_Chr1g06330.1	0.0	43.0	0	0.0	-0.3010299956639812
Chr1	2053656	2057095	mRNA	+	VDAG_JR2_Chr1g06340.1	0.0	43.0	0	0.0	-0.3010299956639812
Chr1	2058888	2061538	mRNA	+	VDAG_JR2_Chr1g06350.1	0.0	43.0	0	0.0	-0.3010299956639812
Chr1	2061703	2066093	mRNA	-	VDAG_JR2_Chr1g06360.1	0.0	43.0	0	0.09090909090909091	-0.22847932851536945
Chr1	2066767	2067860	mRNA	+	VDAG_JR2_Chr1g06370.1	0.0	43.0	0	0.0	-0.3010299956639812
Chr1	2067940	2070850	mRNA	-	VDAG_JR2_Chr1g06380.1	0.0	43.0	0	0.0	-0.3010299956639812
Chr1	2071123	2073003	mRNA	+	VDAG_JR2_Chr1g06390.1	0.0	43.0	0	0.7894736842105263	0.11041248341170351
Chr1	2073117	2075804	mRNA	-	VDAG_JR2_Chr1g06400.1	0.0	43.0	0	0.0	-0.3010299956639812
Chr1	2076853	2079571	mRNA	+	VDAG_JR2_Chr1g06410.1	0.0	43.0	0	0.0	-0.3010299956639812
Chr1	2080577	2082688	mRNA	+	VDAG_JR2_Chr1g06420.1	0.0	43.0	0	0.09523809523809523	-0.22530928172586287
Chr1	2082939	2084982	mRNA	-	VDAG_JR2_Chr1g06430.1	0.0	43.0	0	0.23809523809523808	-0.13188759656362775
Chr1	2085395	2086612	mRNA	-	VDAG_JR2_Chr1g06440.1	0.0	43.0	0	0.0	-0.3010299956639812
Chr1	2087937	2089685	mRNA	+	VDAG_JR2_Chr1g06450.1	0.0	43.0	0	0.0	-0.3010299956639812
Chr1	2089658	2092111	mRNA	-	VDAG_JR2_Chr1g06460.1	0.0	43.0	0	0.0	-0.3010299956639812
Chr1	2093293	2096258	mRNA	+	VDAG_JR2_Chr1g06470.1	0.0	43.0	0	0.0	-0.3010299956639812
Chr1	2096627	2098083	mRNA	+	VDAG_JR2_Chr1g06480.1	0.0	43.0	0	0.0	-0.3010299956639812
Chr1	2099580	2101687	mRNA	+	VDAG_JR2_Chr1g06490.1	0.0	43.0	0	0.9047619047619048	0.1476027212442437
Chr1	2101603	2103097	mRNA	-	VDAG_JR2_Chr1g06500.1	2.0	40.0	0	2.4	0.4623979978989561
Chr1	2106768	2107561	mRNA	-	VDAG_JR2_Chr1g06510.1	0.0	43.0	0	0.0	-0.3010299956639812
Chr1	2107481	2110310	mRNA	+	VDAG_JR2_Chr1g06520.1	0.0	43.0	0	0.0	-0.3010299956639812
Chr1	2110467	2111307	mRNA	+	VDAG_JR2_Chr1g06530.1	0.0	43.0	1	0.0	-0.3010299956639812
Chr1	2111928	2114147	mRNA	+	VDAG_JR2_Chr1g06540.1	0.0	43.0	1	0.0	-0.3010299956639812
Chr1	2114823	2115805	mRNA	+	VDAG_JR2_Chr1g06550.1	0.0	43.0	1	0.0	-0.3010299956639812
Chr1	2116035	2117243	mRNA	+	VDAG_JR2_Chr1g06560.1	0.0	43.0	1	0.0	-0.3010299956639812
Chr1	2118049	2119155	mRNA	+	VDAG_JR2_Chr1g06570.1	0.0	43.0	1	0.0	-0.3010299956639812
Chr1	2119979	2120683	mRNA	-	VDAG_JR2_Chr1g06580.1	0.0	43.0	0	0.0	-0.3010299956639812
Chr1	2121810	2122689	mRNA	-	VDAG_JR2_Chr1g06590.1	0.0	43.0	0	0.0	-0.3010299956639812
Chr1	2122973	2123606	mRNA	+	VDAG_JR2_Chr1g06600.1	0.0	43.0	0	0.0	-0.3010299956639812
Chr1	2125484	2126207	mRNA	+	VDAG_JR2_Chr1g06610.1	0.0	43.0	0	0.0	-0.3010299956639812
Chr1	2127795	2128411	mRNA	+	VDAG_JR2_Chr1g06620.1	0.0	43.0	0	0.0	-0.3010299956639812
Chr1	2130111	2132154	mRNA	+	VDAG_JR2_Chr1g06630.1	0.0	43.0	0	0.0	-0.3010299956639812
Chr1	2132516	2134693	mRNA	-	VDAG_JR2_Chr1g06640.1	0.0	43.0	0	0.0	-0.3010299956639812
Chr1	2135798	2137502	mRNA	+	VDAG_JR2_Chr1g06650.1	0.0	43.0	0	0.0	-0.3010299956639812
Chr1	2137477	2138577	mRNA	-	VDAG_JR2_Chr1g06660.1	0.0	43.0	0	0.9090909090909091	0.14893901301206647
Chr1	2139028	2141284	mRNA	-	VDAG_JR2_Chr1g06670.1	0.0	43.0	0	0.21739130434782608	-0.14424389180368663
Chr1	2142806	2144568	mRNA	-	VDAG_JR2_Chr1g06680.1	0.0	43.0	0	0.0	-0.3010299956639812
Chr1	2144927	2147681	mRNA	+	VDAG_JR2_Chr1g06690.1	0.0	43.0	0	0.0	-0.3010299956639812
Chr1	2147497	2148306	mRNA	-	VDAG_JR2_Chr1g06700.1	0.0	43.0	0	0.0	-0.3010299956639812
Chr1	2148943	2151022	mRNA	-	VDAG_JR2_Chr1g06710.1	0.0	43.0	0	0.0	-0.3010299956639812
Chr1	2151906	2153013	mRNA	-	VDAG_JR2_Chr1g06720.1	0.0	43.0	0	0.0	-0.3010299956639812
Chr1	2153194	2155102	mRNA	+	VDAG_JR2_Chr1g06730.1	0.0	43.0	0	0.0	-0.3010299956639812
Chr1	2155167	2158482	mRNA	-	VDAG_JR2_Chr1g06740.1	0.0	43.0	0	0.06060606060606061	-0.25134221147487373
Chr1	2158648	2159206	mRNA	+	VDAG_JR2_Chr1g06750.1	0.0	43.0	0	0.0	-0.3010299956639812
Chr1	2160503	2161101	mRNA	+	VDAG_JR2_Chr1g06760.1	0.0	43.0	0	0.0	-0.3010299956639812
Chr1	2161904	2164473	mRNA	+	VDAG_JR2_Chr1g06770.1	0.0	43.0	0	0.0	-0.3010299956639812
Chr1	2164822	2165419	mRNA	-	VDAG_JR2_Chr1g06780.1	0.0	43.0	0	0.0	-0.3010299956639812
Chr1	2165764	2168261	mRNA	+	VDAG_JR2_Chr1g06790.1	0.0	43.0	0	0.0	-0.3010299956639812
Chr1	2168468	2170581	mRNA	-	VDAG_JR2_Chr1g06800.1	0.0	43.0	0	1.5238095238095237	0.30616963531639224
Chr1	2170314	2171518	mRNA	-	VDAG_JR2_Chr1g06810.1	0.0	43.0	0	0.0	-0.3010299956639812
Chr1	2173694	2174752	mRNA	-	VDAG_JR2_Chr1g06820.1	0.0	43.0	0	0.0	-0.3010299956639812
Chr1	2176138	2177248	mRNA	-	VDAG_JR2_Chr1g06830.1	0.0	43.0	0	0.0	-0.3010299956639812
Chr1	2177460	2177900	mRNA	+	VDAG_JR2_Chr1g06840.1	0.0	43.0	0	0.0	-0.3010299956639812
Chr1	2178568	2183406	mRNA	-	VDAG_JR2_Chr1g06850.1	0.0	43.0	0	0.0	-0.3010299956639812
Chr1	2185484	2186246	mRNA	+	VDAG_JR2_Chr1g06860.1	0.0	43.0	0	0.0	-0.3010299956639812
Chr1	2187791	2192960	mRNA	-	VDAG_JR2_Chr1g06870.1	0.0	43.0	0	0.0	-0.3010299956639812
Chr1	2193733	2195429	mRNA	+	VDAG_JR2_Chr1g06880.1	0.0	43.0	0	0.0	-0.3010299956639812
Chr1	2195640	2199766	mRNA	+	VDAG_JR2_Chr1g06890.1	0.0	43.0	0	0.0	-0.3010299956639812
Chr1	2199796	2201180	mRNA	-	VDAG_JR2_Chr1g06900.1	0.0	43.0	0	0.7857142857142857	0.109144469425068
Chr1	2201945	2205216	mRNA	-	VDAG_JR2_Chr1g06910.1	0.0	43.0	0	0.09090909090909091	-0.22847932851536945
Chr1	2209074	2212175	mRNA	-	VDAG_JR2_Chr1g06920.1	0.0	43.0	0	0.0	-0.3010299956639812
Chr1	2212390	2213447	mRNA	-	VDAG_JR2_Chr1g06930.1	0.0	43.0	0	0.8	0.11394335230683679
Chr1	2215322	2216274	mRNA	+	VDAG_JR2_Chr1g06940.1	0.0	43.0	0	0.0	-0.3010299956639812
Chr1	2217360	2219502	mRNA	-	VDAG_JR2_Chr1g06950.1	0.0	43.0	0	0.0	-0.3010299956639812
Chr1	2220464	2222555	mRNA	+	VDAG_JR2_Chr1g06960.1	0.0	43.0	0	0.0	-0.3010299956639812
Chr1	2222817	2224656	mRNA	-	VDAG_JR2_Chr1g06970.1	0.0	43.0	0	0.42105263157894735	-0.035715552266534535
Chr1	2224936	2227807	mRNA	-	VDAG_JR2_Chr1g06980.1	0.0	43.0	0	0.0	-0.3010299956639812
Chr1	2228063	2229731	mRNA	+	VDAG_JR2_Chr1g06990.1	0.0	43.0	0	0.0	-0.3010299956639812
Chr1	2229886	2230524	mRNA	-	VDAG_JR2_Chr1g07000.1	0.0	43.0	0	0.0	-0.3010299956639812
Chr1	2231289	2232324	mRNA	+	VDAG_JR2_Chr1g07010.1	0.0	43.0	0	0.0	-0.3010299956639812
Chr1	2235244	2238398	mRNA	+	VDAG_JR2_Chr1g07020.1	0.0	43.0	0	0.0	-0.3010299956639812
Chr1	2238740	2240341	mRNA	+	VDAG_JR2_Chr1g07030.1	0.0	43.0	0	0.0	-0.3010299956639812
Chr1	2240587	2242926	mRNA	-	VDAG_JR2_Chr1g07040.1	0.0	43.0	0	1.0	0.17609125905568124
Chr1	2243766	2248480	mRNA	+	VDAG_JR2_Chr1g07050.1	0.0	43.0	0	11.638297872340425	1.084157790818516
Chr1	2248673	2250650	mRNA	-	VDAG_JR2_Chr1g07060.1	14.0	28.0	0	8.8	0.9684829485539351
Chr1	2250797	2251674	mRNA	+	VDAG_JR2_Chr1g07070.1	0.0	43.0	0	0.0	-0.3010299956639812
Chr1	2254983	2256638	mRNA	-	VDAG_JR2_Chr1g07080.1	0.0	43.0	0	0.0	-0.3010299956639812
Chr1	2257006	2259837	mRNA	-	VDAG_JR2_Chr1g07090.1	1.0	41.0	0	0.03571428571428571	-0.27106677228653797
Chr1	2260045	2261344	mRNA	+	VDAG_JR2_Chr1g07100.1	0.0	43.0	0	0.0	-0.3010299956639812
Chr1	2262167	2263936	mRNA	+	VDAG_JR2_Chr1g07110.1	0.0	43.0	0	0.0	-0.3010299956639812
Chr1	2264072	2265279	mRNA	-	VDAG_JR2_Chr1g07120.1	0.0	43.0	0	0.0	-0.3010299956639812
Chr1	2265569	2278028	mRNA	+	VDAG_JR2_Chr1g07130.1	0.0	43.0	0	0.0	-0.3010299956639812
Chr1	2278361	2279443	mRNA	+	VDAG_JR2_Chr1g07140.1	0.0	43.0	0	1.7	0.3424226808222063
Chr1	2279430	2281909	mRNA	-	VDAG_JR2_Chr1g07150.1	0.0	43.0	0	4.76	0.7209857441537391
Chr1	2282080	2283703	mRNA	-	VDAG_JR2_Chr1g07160.1	1.0	41.0	0	0.4375	-0.028028723600243537
Chr1	2283429	2285861	mRNA	-	VDAG_JR2_Chr1g07170.1	0.0	43.0	0	5.16	0.7528164311882715
Chr1	2285955	2287233	mRNA	+	VDAG_JR2_Chr1g07180.1	0.0	43.0	0	0.6666666666666666	0.06694678963061314
Chr1	2287251	2289472	mRNA	-	VDAG_JR2_Chr1g07190.1	0.0	43.0	0	0.22727272727272727	-0.13830269816628143
Chr1	2290197	2295754	mRNA	+	VDAG_JR2_Chr1g07200.1	0.0	43.0	0	0.32142857142857145	-0.08543019532462635
Chr1	2297034	2299526	mRNA	+	VDAG_JR2_Chr1g07210.1	2.0	40.0	0	0.32	-0.08618614761628328
Chr1	2300796	2304424	mRNA	-	VDAG_JR2_Chr1g07220.1	0.0	43.0	0	0.2777777777777778	-0.10914446942506803
Chr1	2304522	2307548	mRNA	-	VDAG_JR2_Chr1g07230.1	0.0	43.0	0	0.03333333333333333	-0.27300127206373764
Chr1	2308666	2312249	mRNA	+	VDAG_JR2_Chr1g07240.1	0.0	43.0	0	0.0	-0.3010299956639812
Chr1	2312184	2313516	mRNA	-	VDAG_JR2_Chr1g07250.1	0.0	43.0	0	0.0	-0.3010299956639812
Chr1	2314459	2318147	mRNA	+	VDAG_JR2_Chr1g07260.1	0.0	43.0	0	0.0	-0.3010299956639812
Chr1	2318476	2321314	mRNA	-	VDAG_JR2_Chr1g07270.1	0.0	43.0	0	0.0	-0.3010299956639812
Chr1	2321541	2323506	mRNA	+	VDAG_JR2_Chr1g07280.1	0.0	43.0	0	0.8	0.11394335230683679
Chr1	2323534	2324704	mRNA	-	VDAG_JR2_Chr1g07290.1	0.0	43.0	0	0.0	-0.3010299956639812
Chr1	2324864	2326215	mRNA	+	VDAG_JR2_Chr1g07300.1	0.0	43.0	0	0.15384615384615385	-0.18452442659254403
Chr1	2326642	2328236	mRNA	+	VDAG_JR2_Chr1g07310.1	0.0	43.0	0	0.0	-0.3010299956639812
Chr1	2328463	2330045	mRNA	+	VDAG_JR2_Chr1g07320.1	0.0	43.0	0	0.0	-0.3010299956639812
Chr1	2331832	2335275	mRNA	-	VDAG_JR2_Chr1g07330.1	0.0	43.0	0	0.0	-0.3010299956639812
Chr1	2337737	2341106	mRNA	-	VDAG_JR2_Chr1g07340.1	0.0	43.0	0	0.0	-0.3010299956639812
Chr1	2341179	2342268	mRNA	-	VDAG_JR2_Chr1g07350.1	0.0	43.0	0	0.0	-0.3010299956639812
Chr1	2343226	2344995	mRNA	+	VDAG_JR2_Chr1g07360.1	0.0	43.0	0	0.2777777777777778	-0.10914446942506803
Chr1	2345315	2350735	mRNA	-	VDAG_JR2_Chr1g07370.1	0.0	43.0	0	0.0	-0.3010299956639812
Chr1	2352179	2354749	mRNA	-	VDAG_JR2_Chr1g07380.1	0.0	43.0	0	0.0	-0.3010299956639812
Chr1	2355040	2358575	mRNA	-	VDAG_JR2_Chr1g07390.1	0.0	43.0	0	0.8333333333333334	0.1249387366083
Chr1	2360190	2361341	mRNA	-	VDAG_JR2_Chr1g07400.1	0.0	43.0	0	0.0	-0.3010299956639812
Chr1	2361531	2363649	mRNA	+	VDAG_JR2_Chr1g07410.1	1.0	41.0	0	0.047619047619047616	-0.26152145438030755
Chr1	2363748	2367735	mRNA	-	VDAG_JR2_Chr1g07420.1	0.0	43.0	0	0.0	-0.3010299956639812
Chr1	2369121	2369604	mRNA	-	VDAG_JR2_Chr1g07430.1	0.0	43.0	0	0.0	-0.3010299956639812
Chr1	2369827	2371999	mRNA	-	VDAG_JR2_Chr1g07440.1	0.0	43.0	0	0.0	-0.3010299956639812
Chr1	2373101	2374805	mRNA	-	VDAG_JR2_Chr1g07450.1	0.0	43.0	0	0.0	-0.3010299956639812
Chr1	2374902	2376302	mRNA	+	VDAG_JR2_Chr1g07460.1	0.0	43.0	0	0.0	-0.3010299956639812
Chr1	2377899	2381867	mRNA	+	VDAG_JR2_Chr1g07470.1	0.0	43.0	0	0.0	-0.3010299956639812
Chr1	2381789	2384355	mRNA	-	VDAG_JR2_Chr1g07480.1	0.0	43.0	0	0.0	-0.3010299956639812
Chr1	2384598	2386719	mRNA	-	VDAG_JR2_Chr1g07490.1	0.0	43.0	0	0.0	-0.3010299956639812
Chr1	2386899	2391881	mRNA	+	VDAG_JR2_Chr1g07500.1	0.0	43.0	0	0.0	-0.3010299956639812
Chr1	2391814	2393234	mRNA	-	VDAG_JR2_Chr1g07510.1	0.0	43.0	0	0.0	-0.3010299956639812
Chr1	2393393	2399193	mRNA	-	VDAG_JR2_Chr1g07520.1	0.0	43.0	0	0.0	-0.3010299956639812
Chr1	2402086	2405431	mRNA	+	VDAG_JR2_Chr1g07530.1	0.0	43.0	0	0.0	-0.3010299956639812
Chr1	2408959	2411386	mRNA	+	VDAG_JR2_Chr1g07540.1	0.0	43.0	0	0.041666666666666664	-0.2662678894047693
Chr1	2419662	2421743	mRNA	+	VDAG_JR2_Chr1g07550.1	0.0	43.0	0	0.0	-0.3010299956639812
Chr1	2428395	2430307	mRNA	-	VDAG_JR2_Chr1g07560.1	0.0	43.0	0	0.0	-0.3010299956639812
Chr1	2431706	2433045	mRNA	+	VDAG_JR2_Chr1g07570.1	0.0	43.0	0	0.07692307692307693	-0.23888208891513676
Chr1	2433253	2437833	mRNA	-	VDAG_JR2_Chr1g07580.1	0.0	43.0	0	0.0	-0.3010299956639812
Chr1	2438453	2440633	mRNA	-	VDAG_JR2_Chr1g07590.1	0.0	43.0	0	0.0	-0.3010299956639812
Chr1	2441139	2444221	mRNA	-	VDAG_JR2_Chr1g07600.1	0.0	43.0	0	0.0	-0.3010299956639812
Chr1	2445054	2446413	mRNA	+	VDAG_JR2_Chr1g07610.1	0.0	43.0	0	0.0	-0.3010299956639812
Chr1	2446737	2449140	mRNA	+	VDAG_JR2_Chr1g07620.1	0.0	43.0	0	0.0	-0.3010299956639812
Chr1	2449458	2450271	mRNA	-	VDAG_JR2_Chr1g07630.1	0.0	43.0	0	0.0	-0.3010299956639812
Chr1	2450393	2451505	mRNA	+	VDAG_JR2_Chr1g07640.1	0.0	43.0	0	0.0	-0.3010299956639812
Chr1	2451531	2452762	mRNA	-	VDAG_JR2_Chr1g07650.1	0.0	43.0	0	0.0	-0.3010299956639812
Chr1	2454143	2458583	mRNA	-	VDAG_JR2_Chr1g07660.1	0.0	43.0	0	0.0	-0.3010299956639812
Chr1	2460974	2461939	mRNA	-	VDAG_JR2_Chr1g07670.1	0.0	43.0	0	0.1111111111111111	-0.21387981994508098
Chr1	2462181	2465189	mRNA	+	VDAG_JR2_Chr1g07680.1	0.0	43.0	0	0.0	-0.3010299956639812
Chr1	2465248	2467171	mRNA	+	VDAG_JR2_Chr1g07690.1	0.0	43.0	0	0.0	-0.3010299956639812
Chr1	2467287	2472014	mRNA	+	VDAG_JR2_Chr1g07700.1	0.0	43.0	0	0.10638297872340426	-0.21725299792720723
Chr1	2472992	2474206	mRNA	+	VDAG_JR2_Chr1g07710.1	0.0	43.0	0	0.8333333333333334	0.1249387366083
Chr1	2474528	2478057	mRNA	-	VDAG_JR2_Chr1g07720.1	0.0	43.0	0	0.0	-0.3010299956639812
Chr1	2478654	2480260	mRNA	+	VDAG_JR2_Chr1g07730.1	0.0	43.0	0	0.0	-0.3010299956639812
Chr1	2479961	2481628	mRNA	-	VDAG_JR2_Chr1g07740.1	0.0	43.0	0	0.0	-0.3010299956639812
Chr1	2481763	2483459	mRNA	+	VDAG_JR2_Chr1g07750.1	0.0	43.0	0	0.0	-0.3010299956639812
Chr1	2483854	2490512	mRNA	+	VDAG_JR2_Chr1g07760.1	0.0	43.0	0	1.0909090909090908	0.2016453635280694
Chr1	2490722	2494933	mRNA	+	VDAG_JR2_Chr1g07770.1	0.0	43.0	0	0.14285714285714285	-0.1918855262389132
Chr1	2494673	2498495	mRNA	-	VDAG_JR2_Chr1g07780.1	0.0	43.0	0	0.3157894736842105	-0.08842190278253749
Chr1	2499078	2501265	mRNA	+	VDAG_JR2_Chr1g07790.1	0.0	43.0	0	0.0	-0.3010299956639812
Chr1	2501240	2502069	mRNA	-	VDAG_JR2_Chr1g07800.1	0.0	43.0	0	0.0	-0.3010299956639812
Chr1	2502313	2503434	mRNA	+	VDAG_JR2_Chr1g07810.1	0.0	43.0	0	0.0	-0.3010299956639812
Chr1	2503726	2504419	mRNA	+	VDAG_JR2_Chr1g07820.1	0.0	43.0	0	0.14285714285714285	-0.1918855262389132
Chr1	2504493	2505805	mRNA	-	VDAG_JR2_Chr1g07830.1	0.0	43.0	0	0.0	-0.3010299956639812
Chr1	2506401	2507440	mRNA	+	VDAG_JR2_Chr1g07840.1	0.0	43.0	0	0.0	-0.3010299956639812
Chr1	2507449	2508429	mRNA	-	VDAG_JR2_Chr1g07850.1	0.0	43.0	0	0.0	-0.3010299956639812
Chr1	2508568	2510162	mRNA	+	VDAG_JR2_Chr1g07860.1	0.0	43.0	0	0.0	-0.3010299956639812
Chr1	2510780	2515188	mRNA	+	VDAG_JR2_Chr1g07870.1	0.0	43.0	0	0.0	-0.3010299956639812
Chr1	2515212	2516708	mRNA	-	VDAG_JR2_Chr1g07880.1	0.0	43.0	0	0.06666666666666667	-0.24667233334138852
Chr1	2517185	2519003	mRNA	-	VDAG_JR2_Chr1g07890.1	0.0	43.0	0	0.0	-0.3010299956639812
Chr1	2519365	2524874	mRNA	+	VDAG_JR2_Chr1g07900.1	0.0	43.0	0	0.0	-0.3010299956639812
Chr1	2525746	2528649	mRNA	-	VDAG_JR2_Chr1g07910.1	0.0	43.0	0	0.0	-0.3010299956639812
Chr1	2530240	2531971	mRNA	+	VDAG_JR2_Chr1g07920.1	0.0	43.0	0	0.0	-0.3010299956639812
Chr1	2532740	2534191	mRNA	-	VDAG_JR2_Chr1g07930.1	0.0	43.0	0	0.06666666666666667	-0.24667233334138852
Chr1	2540458	2541538	mRNA	-	VDAG_JR2_Chr1g07940.1	0.0	43.0	0	0.0	-0.3010299956639812
Chr1	2542483	2545853	mRNA	+	VDAG_JR2_Chr1g07950.1	0.0	43.0	0	0.029411764705882353	-0.27620641193894907
Chr1	2545866	2548918	mRNA	-	VDAG_JR2_Chr1g07960.1	0.0	43.0	0	0.13333333333333333	-0.1983676537668335
Chr1	2549093	2551202	mRNA	+	VDAG_JR2_Chr1g07970.1	0.0	43.0	0	0.14285714285714285	-0.1918855262389132
Chr1	2551569	2554614	mRNA	+	VDAG_JR2_Chr1g07980.1	0.0	43.0	0	0.2	-0.1549019599857432
Chr1	2554675	2556852	mRNA	-	VDAG_JR2_Chr1g07990.1	0.0	43.0	0	0.0	-0.3010299956639812
Chr1	2558042	2560005	mRNA	-	VDAG_JR2_Chr1g08000.1	0.0	43.0	0	0.0	-0.3010299956639812
Chr1	2560589	2561948	mRNA	-	VDAG_JR2_Chr1g08010.1	0.0	43.0	0	0.0	-0.3010299956639812
Chr1	2562280	2563636	mRNA	+	VDAG_JR2_Chr1g08020.1	0.0	43.0	0	0.46153846153846156	-0.017033339298780342
Chr1	2563710	2565994	mRNA	-	VDAG_JR2_Chr1g08030.1	0.0	43.0	0	0.0	-0.3010299956639812
Chr1	2566210	2568453	mRNA	+	VDAG_JR2_Chr1g08040.1	0.0	43.0	0	0.0	-0.3010299956639812
Chr1	2568911	2571299	mRNA	+	VDAG_JR2_Chr1g08050.1	0.0	43.0	0	0.0	-0.3010299956639812
Chr1	2572028	2573589	mRNA	+	VDAG_JR2_Chr1g08060.1	0.0	43.0	0	0.3125	-0.09017663034908802
Chr1	2575251	2577082	mRNA	-	VDAG_JR2_Chr1g08070.1	3.0	39.0	0	0.2777777777777778	-0.10914446942506803
Chr1	2577478	2579276	mRNA	-	VDAG_JR2_Chr1g08080.1	5.0	37.0	0	2.0	0.3979400086720376
Chr1	2579916	2582432	mRNA	-	VDAG_JR2_Chr1g08090.1	0.0	43.0	0	0.0	-0.3010299956639812
Chr1	2583544	2585478	mRNA	-	VDAG_JR2_Chr1g08100.1	0.0	43.0	0	0.15	-0.18708664335714442
Chr1	2585946	2588444	mRNA	+	VDAG_JR2_Chr1g08110.1	0.0	43.0	0	0.0	-0.3010299956639812
Chr1	2590437	2592640	mRNA	+	VDAG_JR2_Chr1g08120.1	0.0	43.0	0	0.09090909090909091	-0.22847932851536945
Chr1	2593119	2597820	mRNA	-	VDAG_JR2_Chr1g08130.1	0.0	43.0	0	0.23404255319148937	-0.13427876286244333
Chr1	2597620	2599334	mRNA	+	VDAG_JR2_Chr1g08140.1	0.0	43.0	0	0.0	-0.3010299956639812
Chr1	2599680	2601377	mRNA	+	VDAG_JR2_Chr1g08150.1	0.0	43.0	0	1.7647058823529411	0.35501180813022676
Chr1	2601350	2604987	mRNA	-	VDAG_JR2_Chr1g08160.1	1.0	41.0	0	0.02702702702702703	-0.278167112704477
Chr1	2605635	2608044	mRNA	+	VDAG_JR2_Chr1g08170.1	0.0	43.0	0	0.041666666666666664	-0.2662678894047693
Chr1	2608861	2611410	mRNA	-	VDAG_JR2_Chr1g08180.1	0.0	43.0	0	0.12	-0.20760831050174613
Chr1	2611797	2614077	mRNA	+	VDAG_JR2_Chr1g08190.1	0.0	43.0	0	0.0	-0.3010299956639812
Chr1	2614307	2615124	mRNA	+	VDAG_JR2_Chr1g08200.1	0.0	43.0	0	0.0	-0.3010299956639812
Chr1	2615227	2617144	mRNA	-	VDAG_JR2_Chr1g08210.1	0.0	43.0	0	0.0	-0.3010299956639812
Chr1	2618739	2620663	mRNA	-	VDAG_JR2_Chr1g08220.1	0.0	43.0	0	0.3	-0.09691001300805639
Chr1	2622136	2625551	mRNA	-	VDAG_JR2_Chr1g08230.1	0.0	43.0	0	1.7428571428571429	0.3508016123949769
Chr1	2625813	2627571	mRNA	-	VDAG_JR2_Chr1g08240.1	0.0	43.0	0	0.0	-0.3010299956639812
Chr1	2628254	2631870	mRNA	+	VDAG_JR2_Chr1g08250.1	0.0	43.0	0	0.0	-0.3010299956639812
Chr1	2633434	2638014	mRNA	-	VDAG_JR2_Chr1g08260.1	1.0	41.0	0	0.717391304347826	0.08543019532462637
Chr1	2638203	2639428	mRNA	+	VDAG_JR2_Chr1g08270.1	0.0	43.0	0	4.416666666666667	0.6916707655945193
Chr1	2639438	2642309	mRNA	-	VDAG_JR2_Chr1g08280.1	0.0	43.0	0	0.0	-0.3010299956639812
Chr1	2644082	2646062	mRNA	+	VDAG_JR2_Chr1g08290.1	0.0	43.0	0	0.0	-0.3010299956639812
Chr1	2646309	2647856	mRNA	+	VDAG_JR2_Chr1g08300.1	0.0	43.0	0	1.125	0.21085336531489318
Chr1	2648174	2649175	mRNA	-	VDAG_JR2_Chr1g08310.1	0.0	43.0	0	0.0	-0.3010299956639812
Chr1	2649365	2650045	mRNA	-	VDAG_JR2_Chr1g08320.1	0.0	43.0	0	0.0	-0.3010299956639812
Chr1	2650660	2651458	mRNA	+	VDAG_JR2_Chr1g08330.1	0.0	43.0	0	0.0	-0.3010299956639812
Chr1	2651588	2653192	mRNA	+	VDAG_JR2_Chr1g08340.1	0.0	43.0	0	0.0	-0.3010299956639812
Chr1	2655223	2656357	mRNA	+	VDAG_JR2_Chr1g08350.1	0.0	43.0	0	4.5	0.6989700043360189
Chr1	2656744	2661043	mRNA	-	VDAG_JR2_Chr1g08360.1	0.0	43.0	0	0.16279069767441862	-0.17862359557107627
Chr1	2661586	2663558	mRNA	+	VDAG_JR2_Chr1g08370.1	0.0	43.0	0	0.05	-0.2596373105057561
Chr1	2665856	2669315	mRNA	+	VDAG_JR2_Chr1g08380.1	0.0	43.0	0	0.0	-0.3010299956639812
Chr1	2669906	2671375	mRNA	+	VDAG_JR2_Chr1g08390.1	1.0	41.0	0	0.13333333333333333	-0.1983676537668335
Chr1	2671814	2674130	mRNA	+	VDAG_JR2_Chr1g08400.1	0.0	43.0	0	0.0	-0.3010299956639812
Chr1	2673605	2676667	mRNA	-	VDAG_JR2_Chr1g08410.1	0.0	43.0	0	3.2903225806451615	0.5786761727734824
Chr1	2676961	2678799	mRNA	+	VDAG_JR2_Chr1g08420.1	0.0	43.0	0	0.4444444444444444	-0.024823583725032152
Chr1	2678886	2681209	mRNA	-	VDAG_JR2_Chr1g08430.1	0.0	43.0	0	0.34782608695652173	-0.07169322465507487
Chr1	2681694	2684529	mRNA	+	VDAG_JR2_Chr1g08440.1	0.0	43.0	0	1.6428571428571428	0.3309932190414244
Chr1	2687596	2689004	mRNA	+	VDAG_JR2_Chr1g08450.1	0.0	43.0	0	0.0	-0.3010299956639812
Chr1	2691533	2695988	mRNA	+	VDAG_JR2_Chr1g08460.1	0.0	43.0	0	0.0	-0.3010299956639812
Chr1	2696124	2698942	mRNA	-	VDAG_JR2_Chr1g08470.1	0.0	43.0	0	0.0	-0.3010299956639812
Chr1	2699146	2700045	mRNA	+	VDAG_JR2_Chr1g08480.1	0.0	43.0	0	0.0	-0.3010299956639812
Chr1	2700151	2701719	mRNA	-	VDAG_JR2_Chr1g08490.1	0.0	43.0	0	0.0	-0.3010299956639812
Chr1	2701889	2705644	mRNA	+	VDAG_JR2_Chr1g08500.1	0.0	43.0	0	0.05405405405405406	-0.2564478630112407
Chr1	2705606	2707494	mRNA	-	VDAG_JR2_Chr1g08510.1	0.0	43.0	0	1.3157894736842106	0.25906549412044516
Chr1	2707708	2710316	mRNA	+	VDAG_JR2_Chr1g08520.1	0.0	43.0	0	0.6153846153846154	0.047424649928138135
Chr1	2710230	2711351	mRNA	-	VDAG_JR2_Chr1g08530.1	0.0	43.0	0	0.08333333333333333	-0.23408320603336796
Chr1	2711483	2712854	mRNA	+	VDAG_JR2_Chr1g08540.1	0.0	43.0	0	1.2857142857142858	0.2518119729937996
Chr1	2713308	2713844	mRNA	+	VDAG_JR2_Chr1g08550.1	2.0	40.0	0	2.0	0.3979400086720376
Chr1	2713964	2716510	mRNA	-	VDAG_JR2_Chr1g08560.1	0.0	43.0	0	0.0	-0.3010299956639812
Chr1	2716696	2718239	mRNA	-	VDAG_JR2_Chr1g08570.1	0.0	43.0	0	0.2	-0.1549019599857432
Chr1	2719851	2720672	mRNA	+	VDAG_JR2_Chr1g08580.1	0.0	43.0	0	0.0	-0.3010299956639812
Chr1	2721186	2722747	mRNA	+	VDAG_JR2_Chr1g08590.1	0.0	43.0	0	0.2	-0.1549019599857432
Chr1	2724015	2725928	mRNA	+	VDAG_JR2_Chr1g08600.1	0.0	43.0	0	0.0	-0.3010299956639812
Chr1	2726008	2728204	mRNA	-	VDAG_JR2_Chr1g08610.1	0.0	43.0	0	0.36363636363636365	-0.06366907986937727
Chr1	2728405	2731555	mRNA	+	VDAG_JR2_Chr1g08620.1	0.0	43.0	0	0.0	-0.3010299956639812
Chr1	2732083	2736362	mRNA	+	VDAG_JR2_Chr1g08630.1	0.0	43.0	0	0.0	-0.3010299956639812
Chr1	2736477	2737135	mRNA	+	VDAG_JR2_Chr1g08640.1	0.0	43.0	0	0.0	-0.3010299956639812
Chr1	2737583	2739299	mRNA	+	VDAG_JR2_Chr1g08650.1	0.0	43.0	0	0.0	-0.3010299956639812
Chr1	2737604	2739367	mRNA	+	VDAG_JR2_Chr1g08660.1	0.0	43.0	0	0.0	-0.3010299956639812
Chr1	2739345	2740690	mRNA	-	VDAG_JR2_Chr1g08670.1	0.0	43.0	0	0.5714285714285714	0.029963223377443202
Chr1	2740915	2742865	mRNA	+	VDAG_JR2_Chr1g08680.1	0.0	43.0	0	0.0	-0.3010299956639812
Chr1	2743372	2747158	mRNA	+	VDAG_JR2_Chr1g08690.1	0.0	43.0	0	0.0	-0.3010299956639812
Chr1	2747318	2749962	mRNA	-	VDAG_JR2_Chr1g08700.1	0.0	43.0	0	0.0	-0.3010299956639812
Chr1	2750522	2751976	mRNA	+	VDAG_JR2_Chr1g08710.1	0.0	43.0	0	0.0	-0.3010299956639812
Chr1	2753408	2754787	mRNA	+	VDAG_JR2_Chr1g08720.1	0.0	43.0	0	0.5714285714285714	0.029963223377443202
Chr1	2755330	2756923	mRNA	-	VDAG_JR2_Chr1g08730.1	0.0	43.0	0	0.0	-0.3010299956639812
Chr1	2757780	2765249	mRNA	+	VDAG_JR2_Chr1g08740.1	0.0	43.0	0	0.10810810810810811	-0.2160192059556325
Chr1	2763091	2764910	mRNA	-	VDAG_JR2_Chr1g08750.1	0.0	43.0	0	0.4444444444444444	-0.024823583725032152
Chr1	2766186	2768227	mRNA	+	VDAG_JR2_Chr1g08760.1	0.0	43.0	0	0.1	-0.2218487496163564
Chr1	2768407	2773673	mRNA	+	VDAG_JR2_Chr1g08770.1	0.0	43.0	0	0.05660377358490566	-0.25445385362262607
Chr1	2773672	2777823	mRNA	-	VDAG_JR2_Chr1g08780.1	0.0	43.0	0	0.0	-0.3010299956639812
Chr1	2779607	2781116	mRNA	-	VDAG_JR2_Chr1g08790.1	0.0	43.0	0	0.0	-0.3010299956639812
Chr1	2781313	2782680	mRNA	+	VDAG_JR2_Chr1g08800.1	0.0	43.0	0	0.0	-0.3010299956639812
Chr1	2782723	2786900	mRNA	-	VDAG_JR2_Chr1g08810.1	0.0	43.0	0	0.0	-0.3010299956639812
Chr1	2788220	2792340	mRNA	+	VDAG_JR2_Chr1g08820.1	0.0	43.0	0	0.0	-0.3010299956639812
Chr1	2790580	2792149	mRNA	-	VDAG_JR2_Chr1g08830.1	0.0	43.0	0	0.0	-0.3010299956639812
Chr1	2793090	2795265	mRNA	+	VDAG_JR2_Chr1g08840.1	0.0	43.0	0	0.09090909090909091	-0.22847932851536945
Chr1	2795314	2796727	mRNA	-	VDAG_JR2_Chr1g08850.1	1.0	41.0	0	1.7857142857142858	0.3590219426416679
Chr1	2799985	2802478	mRNA	+	VDAG_JR2_Chr1g08860.1	0.0	43.0	0	0.0	-0.3010299956639812
Chr1	2803232	2807316	mRNA	+	VDAG_JR2_Chr1g08870.1	0.0	43.0	0	0.0	-0.3010299956639812
Chr1	2805824	2812870	mRNA	-	VDAG_JR2_Chr1g08880.1	0.0	43.0	0	0.0	-0.3010299956639812
Chr1	2814564	2818067	mRNA	+	VDAG_JR2_Chr1g08890.1	0.0	43.0	0	0.0	-0.3010299956639812
Chr1	2818600	2822814	mRNA	-	VDAG_JR2_Chr1g08900.1	0.0	43.0	0	0.0	-0.3010299956639812
Chr1	2822957	2824772	mRNA	+	VDAG_JR2_Chr1g08910.1	0.0	43.0	0	0.0	-0.3010299956639812
Chr1	2825380	2826804	mRNA	-	VDAG_JR2_Chr1g08920.1	0.0	43.0	0	0.0	-0.3010299956639812
Chr1	2827061	2831187	mRNA	+	VDAG_JR2_Chr1g08930.1	0.0	43.0	0	0.0	-0.3010299956639812
Chr1	2831659	2834054	mRNA	+	VDAG_JR2_Chr1g08940.1	0.0	43.0	0	0.0	-0.3010299956639812
Chr1	2834023	2835092	mRNA	-	VDAG_JR2_Chr1g08950.1	0.0	43.0	0	0.0	-0.3010299956639812
Chr1	2835319	2838489	mRNA	-	VDAG_JR2_Chr1g08960.1	0.0	43.0	0	0.71875	0.08591462870659324
Chr1	2840162	2843030	mRNA	+	VDAG_JR2_Chr1g08970.1	0.0	43.0	0	0.0	-0.3010299956639812
Chr1	2844716	2847862	mRNA	+	VDAG_JR2_Chr1g08980.1	0.0	43.0	0	0.0	-0.3010299956639812
Chr1	2848799	2849910	mRNA	-	VDAG_JR2_Chr1g08990.1	0.0	43.0	0	0.0	-0.3010299956639812
Chr1	2849999	2851801	mRNA	+	VDAG_JR2_Chr1g09000.1	0.0	43.0	0	0.0	-0.3010299956639812
Chr1	2852256	2854172	mRNA	-	VDAG_JR2_Chr1g09010.1	0.0	43.0	0	0.0	-0.3010299956639812
Chr1	2855615	2858424	mRNA	+	VDAG_JR2_Chr1g09020.1	0.0	43.0	0	0.10714285714285714	-0.21670910996394532
Chr1	2865193	2866672	mRNA	+	VDAG_JR2_Chr1g09030.1	0.0	43.0	0	0.0	-0.3010299956639812
Chr1	2866769	2869583	mRNA	+	VDAG_JR2_Chr1g09040.1	0.0	43.0	0	0.0	-0.3010299956639812
Chr1	2869720	2870758	mRNA	+	VDAG_JR2_Chr1g09050.1	0.0	43.0	0	0.0	-0.3010299956639812
Chr1	2870786	2873540	mRNA	-	VDAG_JR2_Chr1g09060.1	0.0	43.0	0	0.0	-0.3010299956639812
Chr1	2873968	2875495	mRNA	-	VDAG_JR2_Chr1g09070.1	0.0	43.0	0	0.0	-0.3010299956639812
Chr1	2875497	2876701	mRNA	-	VDAG_JR2_Chr1g09080.1	0.0	43.0	0	0.0	-0.3010299956639812
Chr1	2876964	2879185	mRNA	-	VDAG_JR2_Chr1g09090.1	0.0	43.0	0	0.0	-0.3010299956639812
Chr1	2879713	2881644	mRNA	-	VDAG_JR2_Chr1g09100.1	0.0	43.0	0	0.0	-0.3010299956639812
Chr1	2881873	2883340	mRNA	+	VDAG_JR2_Chr1g09110.1	0.0	43.0	0	0.0	-0.3010299956639812
Chr1	2883823	2888101	mRNA	+	VDAG_JR2_Chr1g09120.1	0.0	43.0	0	0.0	-0.3010299956639812
Chr1	2889580	2890943	mRNA	-	VDAG_JR2_Chr1g09130.1	0.0	43.0	0	0.0	-0.3010299956639812
Chr1	2891241	2891986	mRNA	+	VDAG_JR2_Chr1g09140.1	0.0	43.0	0	0.0	-0.3010299956639812
Chr1	2891901	2893438	mRNA	-	VDAG_JR2_Chr1g09150.1	0.0	43.0	0	0.0	-0.3010299956639812
Chr1	2895154	2896341	mRNA	+	VDAG_JR2_Chr1g09160.1	0.0	43.0	0	0.0	-0.3010299956639812
Chr1	2896606	2898859	mRNA	-	VDAG_JR2_Chr1g09170.1	0.0	43.0	0	0.043478260869565216	-0.2648178230095365
Chr1	2899789	2902040	mRNA	+	VDAG_JR2_Chr1g09180.1	0.0	43.0	0	0.0	-0.3010299956639812
Chr1	2902448	2906838	mRNA	+	VDAG_JR2_Chr1g09190.1	0.0	43.0	0	0.0	-0.3010299956639812
Chr1	2906723	2907661	mRNA	-	VDAG_JR2_Chr1g09200.1	0.0	43.0	0	0.0	-0.3010299956639812
Chr1	2907707	2909194	mRNA	+	VDAG_JR2_Chr1g09210.1	0.0	43.0	0	0.0	-0.3010299956639812
Chr1	2909199	2911693	mRNA	-	VDAG_JR2_Chr1g09220.1	0.0	43.0	0	0.0	-0.3010299956639812
Chr1	2912444	2915505	mRNA	-	VDAG_JR2_Chr1g09230.1	0.0	43.0	0	0.0	-0.3010299956639812
Chr1	2915867	2919761	mRNA	-	VDAG_JR2_Chr1g09240.1	0.0	43.0	0	0.07692307692307693	-0.23888208891513676
Chr1	3094772	3096402	mRNA	+	VDAG_JR2_Chr1g09250.1	0.0	43.0	0	0.0	-0.3010299956639812
Chr1	3096551	3098019	mRNA	+	VDAG_JR2_Chr1g09260.1	0.0	43.0	0	0.0	-0.3010299956639812
Chr1	3098185	3099711	mRNA	-	VDAG_JR2_Chr1g09270.1	0.0	43.0	0	0.0	-0.3010299956639812
Chr1	3100119	3101162	mRNA	+	VDAG_JR2_Chr1g09280.1	0.0	43.0	0	0.0	-0.3010299956639812
Chr1	3101532	3102384	mRNA	-	VDAG_JR2_Chr1g09290.1	0.0	43.0	0	0.0	-0.3010299956639812
Chr1	3102432	3103982	mRNA	-	VDAG_JR2_Chr1g09300.1	0.0	43.0	0	0.0	-0.3010299956639812
Chr1	3104047	3104794	mRNA	-	VDAG_JR2_Chr1g09310.1	0.0	43.0	0	0.0	-0.3010299956639812
Chr1	3105556	3106837	mRNA	+	VDAG_JR2_Chr1g09320.1	0.0	43.0	0	0.08333333333333333	-0.23408320603336796
Chr1	3106764	3108087	mRNA	-	VDAG_JR2_Chr1g09330.1	0.0	43.0	0	0.0	-0.3010299956639812
Chr1	3108446	3111956	mRNA	+	VDAG_JR2_Chr1g09340.1	0.0	43.0	0	0.0	-0.3010299956639812
Chr1	3112128	3113572	mRNA	+	VDAG_JR2_Chr1g09350.1	0.0	43.0	0	0.0	-0.3010299956639812
Chr1	3113935	3115219	mRNA	+	VDAG_JR2_Chr1g09360.1	0.0	43.0	0	0.0	-0.3010299956639812
Chr1	3115122	3115716	mRNA	+	VDAG_JR2_Chr1g09370.1	0.0	43.0	0	0.0	-0.3010299956639812
Chr1	3115747	3116522	mRNA	-	VDAG_JR2_Chr1g09380.1	0.0	43.0	0	0.0	-0.3010299956639812
Chr1	3116707	3117645	mRNA	-	VDAG_JR2_Chr1g09390.1	0.0	43.0	0	0.0	-0.3010299956639812
Chr1	3117988	3124046	mRNA	-	VDAG_JR2_Chr1g09400.1	0.0	43.0	0	0.0	-0.3010299956639812
Chr1	3124606	3126977	mRNA	-	VDAG_JR2_Chr1g09410.1	0.0	43.0	0	0.0	-0.3010299956639812
Chr1	3127755	3130022	mRNA	-	VDAG_JR2_Chr1g09420.1	0.0	43.0	0	0.0	-0.3010299956639812
Chr1	3130253	3135609	mRNA	+	VDAG_JR2_Chr1g09430.1	0.0	43.0	0	0.0	-0.3010299956639812
Chr1	3135693	3137473	mRNA	+	VDAG_JR2_Chr1g09440.1	0.0	43.0	0	0.0	-0.3010299956639812
Chr1	3137529	3138139	mRNA	-	VDAG_JR2_Chr1g09450.1	0.0	43.0	0	0.0	-0.3010299956639812
Chr1	3138472	3140218	mRNA	+	VDAG_JR2_Chr1g09460.1	0.0	43.0	0	0.0	-0.3010299956639812
Chr1	3139919	3146638	mRNA	-	VDAG_JR2_Chr1g09470.1	0.0	43.0	0	0.0	-0.3010299956639812
Chr1	3147347	3148462	mRNA	-	VDAG_JR2_Chr1g09480.1	0.0	43.0	0	0.0	-0.3010299956639812
Chr1	3148614	3149799	mRNA	+	VDAG_JR2_Chr1g09490.1	0.0	43.0	0	0.0	-0.3010299956639812
Chr1	3151256	3153389	mRNA	+	VDAG_JR2_Chr1g09500.1	0.0	43.0	0	0.0	-0.3010299956639812
Chr1	3153608	3156399	mRNA	-	VDAG_JR2_Chr1g09510.1	0.0	43.0	0	0.0	-0.3010299956639812
Chr1	3157289	3159009	mRNA	-	VDAG_JR2_Chr1g09520.1	0.0	43.0	0	0.0	-0.3010299956639812
Chr1	3159067	3161075	mRNA	+	VDAG_JR2_Chr1g09530.1	0.0	43.0	0	0.0	-0.3010299956639812
Chr1	3160885	3164355	mRNA	-	VDAG_JR2_Chr1g09540.1	0.0	43.0	0	0.0	-0.3010299956639812
Chr1	3164599	3167109	mRNA	+	VDAG_JR2_Chr1g09550.1	0.0	43.0	0	0.0	-0.3010299956639812
Chr1	3169201	3171124	mRNA	-	VDAG_JR2_Chr1g09560.1	0.0	43.0	0	0.0	-0.3010299956639812
Chr1	3172057	3175212	mRNA	-	VDAG_JR2_Chr1g09570.1	0.0	43.0	0	0.0	-0.3010299956639812
Chr1	3176117	3179908	mRNA	-	VDAG_JR2_Chr1g09580.1	0.0	43.0	0	0.0	-0.3010299956639812
Chr1	3180310	3183492	mRNA	-	VDAG_JR2_Chr1g09590.1	0.0	43.0	0	0.0	-0.3010299956639812
Chr1	3183700	3187173	mRNA	+	VDAG_JR2_Chr1g09600.1	0.0	43.0	0	0.0	-0.3010299956639812
Chr1	3186618	3190913	mRNA	-	VDAG_JR2_Chr1g09610.1	0.0	43.0	0	0.06976744186046512	-0.24430237121505405
Chr1	3191220	3192706	mRNA	+	VDAG_JR2_Chr1g09620.1	4.0	38.0	0	2.4	0.4623979978989561
Chr1	3192731	3194818	mRNA	+	VDAG_JR2_Chr1g09630.1	2.0	40.0	0	4.190476190476191	0.6712169357636925
Chr1	3195100	3197159	mRNA	-	VDAG_JR2_Chr1g09640.1	0.0	43.0	0	0.0	-0.3010299956639812
Chr1	3198422	3200750	mRNA	+	VDAG_JR2_Chr1g09650.1	0.0	43.0	0	0.16666666666666666	-0.17609125905568127
Chr1	3203469	3207140	mRNA	-	VDAG_JR2_Chr1g09660.1	0.0	43.0	0	0.027777777777777776	-0.2775488998144583
Chr1	3210298	3212308	mRNA	-	VDAG_JR2_Chr1g09670.1	0.0	43.0	0	0.0	-0.3010299956639812
Chr1	3212734	3215354	mRNA	+	VDAG_JR2_Chr1g09680.1	0.0	43.0	0	0.0	-0.3010299956639812
Chr1	3214946	3216303	mRNA	+	VDAG_JR2_Chr1g09690.1	0.0	43.0	0	0.0	-0.3010299956639812
Chr1	3216554	3217882	mRNA	+	VDAG_JR2_Chr1g09700.1	0.0	43.0	0	0.0	-0.3010299956639812
Chr1	3218250	3219002	mRNA	+	VDAG_JR2_Chr1g09710.1	0.0	43.0	0	0.625	0.05115252244738129
Chr1	3218997	3220237	mRNA	-	VDAG_JR2_Chr1g09720.1	0.0	43.0	0	0.0	-0.3010299956639812
Chr1	3220401	3224734	mRNA	+	VDAG_JR2_Chr1g09730.1	0.0	43.0	0	0.0	-0.3010299956639812
Chr1	3226648	3229305	mRNA	+	VDAG_JR2_Chr1g09740.1	0.0	43.0	0	0.0	-0.3010299956639812
Chr1	3229815	3236001	mRNA	+	VDAG_JR2_Chr1g09750.1	0.0	43.0	0	0.20967741935483872	-0.1489390130120664
Chr1	3235952	3238193	mRNA	-	VDAG_JR2_Chr1g09760.1	0.0	43.0	0	6.545454545454546	0.8479090173480853
Chr1	3238482	3242686	mRNA	-	VDAG_JR2_Chr1g09770.1	1.0	41.0	0	0.023809523809523808	-0.2808266095756942
Chr1	3243013	3245433	mRNA	-	VDAG_JR2_Chr1g09780.1	0.0	43.0	0	0.0	-0.3010299956639812
Chr1	3246622	3247396	mRNA	-	VDAG_JR2_Chr1g09790.1	0.0	43.0	0	0.0	-0.3010299956639812
Chr1	3247588	3249313	mRNA	+	VDAG_JR2_Chr1g09800.1	0.0	43.0	0	0.0	-0.3010299956639812
Chr1	3249746	3252781	mRNA	-	VDAG_JR2_Chr1g09810.1	0.0	43.0	0	0.0	-0.3010299956639812
Chr1	3253085	3255401	mRNA	+	VDAG_JR2_Chr1g09820.1	0.0	43.0	0	0.2608695652173913	-0.11868978733129841
Chr1	3255497	3256646	mRNA	-	VDAG_JR2_Chr1g09830.1	0.0	43.0	0	0.0	-0.3010299956639812
Chr1	3257024	3259444	mRNA	+	VDAG_JR2_Chr1g09840.1	0.0	43.0	0	0.6666666666666666	0.06694678963061314
Chr1	3259428	3260794	mRNA	-	VDAG_JR2_Chr1g09850.1	0.0	43.0	0	4.642857142857143	0.7112044607530305
Chr1	3261129	3262625	mRNA	+	VDAG_JR2_Chr1g09860.1	0.0	43.0	0	0.0	-0.3010299956639812
Chr1	3262568	3265057	mRNA	-	VDAG_JR2_Chr1g09870.1	0.0	43.0	0	0.0	-0.3010299956639812
Chr1	3265213	3266773	mRNA	+	VDAG_JR2_Chr1g09880.1	0.0	43.0	0	0.0	-0.3010299956639812
Chr1	3270071	3274489	mRNA	-	VDAG_JR2_Chr1g09890.1	0.0	43.0	0	0.0	-0.3010299956639812
Chr1	3274861	3276459	mRNA	-	VDAG_JR2_Chr1g09900.1	0.0	43.0	0	0.0625	-0.2498774732165999
Chr1	3278968	3280192	mRNA	-	VDAG_JR2_Chr1g09910.1	0.0	43.0	0	0.0	-0.3010299956639812
Chr1	3280379	3282183	mRNA	+	VDAG_JR2_Chr1g09920.1	0.0	43.0	0	0.0	-0.3010299956639812
Chr1	3282429	3284195	mRNA	-	VDAG_JR2_Chr1g09930.1	0.0	43.0	0	0.6111111111111112	0.04575749056067514
Chr1	3284366	3285445	mRNA	+	VDAG_JR2_Chr1g09940.1	0.0	43.0	0	0.0	-0.3010299956639812
Chr1	3285600	3287979	mRNA	-	VDAG_JR2_Chr1g09950.1	0.0	43.0	0	0.0	-0.3010299956639812
Chr1	3288046	3289603	mRNA	-	VDAG_JR2_Chr1g09960.1	0.0	43.0	0	0.0	-0.3010299956639812
Chr1	3289851	3291291	mRNA	+	VDAG_JR2_Chr1g09970.1	0.0	43.0	0	0.0	-0.3010299956639812
Chr1	3291351	3291922	mRNA	+	VDAG_JR2_Chr1g09980.1	0.0	43.0	0	0.0	-0.3010299956639812
Chr1	3291913	3292488	mRNA	-	VDAG_JR2_Chr1g09990.1	0.0	43.0	0	0.0	-0.3010299956639812
Chr1	3292587	3293294	mRNA	+	VDAG_JR2_Chr1g10000.1	0.0	43.0	0	0.0	-0.3010299956639812
Chr1	3293320	3294604	mRNA	-	VDAG_JR2_Chr1g10010.1	0.0	43.0	0	0.0	-0.3010299956639812
Chr1	3294865	3296002	mRNA	-	VDAG_JR2_Chr1g10020.1	0.0	43.0	0	0.0	-0.3010299956639812
Chr1	3296222	3298595	mRNA	+	VDAG_JR2_Chr1g10030.1	0.0	43.0	0	0.25	-0.12493873660829995
Chr1	3298572	3300551	mRNA	-	VDAG_JR2_Chr1g10040.1	0.0	43.0	0	0.0	-0.3010299956639812
Chr1	3301933	3304225	mRNA	+	VDAG_JR2_Chr1g10050.1	0.0	43.0	0	0.0	-0.3010299956639812
Chr1	3305176	3308221	mRNA	+	VDAG_JR2_Chr1g10060.1	0.0	43.0	0	0.0	-0.3010299956639812
Chr1	3308184	3309615	mRNA	-	VDAG_JR2_Chr1g10070.1	0.0	43.0	0	1.2142857142857142	0.23408320603336796
Chr1	3309738	3310705	mRNA	-	VDAG_JR2_Chr1g10080.1	0.0	43.0	0	0.0	-0.3010299956639812
Chr1	3310939	3314866	mRNA	+	VDAG_JR2_Chr1g10090.1	0.0	43.0	0	0.425	-0.03385826726096737
Chr1	3315547	3319202	mRNA	-	VDAG_JR2_Chr1g10100.1	0.0	43.0	0	0.0	-0.3010299956639812
Chr1	3319122	3320580	mRNA	-	VDAG_JR2_Chr1g10110.1	0.0	43.0	0	0.0	-0.3010299956639812
Chr1	3320745	3321794	mRNA	+	VDAG_JR2_Chr1g10120.1	0.0	43.0	0	0.9090909090909091	0.14893901301206647
Chr1	3321756	3323190	mRNA	-	VDAG_JR2_Chr1g10130.1	0.0	43.0	0	0.42857142857142855	-0.03218468337140124
Chr1	3323729	3325042	mRNA	-	VDAG_JR2_Chr1g10140.1	0.0	43.0	0	0.15384615384615385	-0.18452442659254403
Chr1	3325521	3326224	mRNA	-	VDAG_JR2_Chr1g10150.1	0.0	43.0	0	0.0	-0.3010299956639812
Chr1	3326421	3328955	mRNA	-	VDAG_JR2_Chr1g10160.1	0.0	43.0	0	0.0	-0.3010299956639812
Chr1	3329123	3335781	mRNA	+	VDAG_JR2_Chr1g10170.1	0.0	43.0	0	0.13432835820895522	-0.19768587265051493
Chr1	3336197	3337858	mRNA	+	VDAG_JR2_Chr1g10180.1	0.0	43.0	0	0.8235294117647058	0.12173359673308855
Chr1	3338840	3339689	mRNA	+	VDAG_JR2_Chr1g10190.1	0.0	43.0	0	0.0	-0.3010299956639812
Chr1	3339861	3342083	mRNA	+	VDAG_JR2_Chr1g10200.1	0.0	43.0	0	0.5	0.0
Chr1	3342162	3344001	mRNA	-	VDAG_JR2_Chr1g10210.1	0.0	43.0	0	0.0	-0.3010299956639812
Chr1	3344253	3345891	mRNA	+	VDAG_JR2_Chr1g10220.1	0.0	43.0	0	0.0	-0.3010299956639812
Chr1	3345818	3346792	mRNA	-	VDAG_JR2_Chr1g10230.1	0.0	43.0	0	3.4	0.5910646070264992
Chr1	3349927	3351579	mRNA	+	VDAG_JR2_Chr1g10240.1	0.0	43.0	0	0.11764705882352941	-0.20925962230833584
Chr1	3351624	3352863	mRNA	-	VDAG_JR2_Chr1g10250.1	0.0	43.0	0	0.0	-0.3010299956639812
Chr1	3353046	3354879	mRNA	+	VDAG_JR2_Chr1g10260.1	0.0	43.0	0	0.0	-0.3010299956639812
Chr1	3354977	3356423	mRNA	-	VDAG_JR2_Chr1g10270.1	0.0	43.0	0	0.0	-0.3010299956639812
Chr1	3356539	3358044	mRNA	+	VDAG_JR2_Chr1g10280.1	0.0	43.0	0	7.4	0.8976270912904415
Chr1	3358138	3360722	mRNA	-	VDAG_JR2_Chr1g10290.1	2.0	40.0	0	1.8846153846153846	0.3774183415274359
Chr1	3360843	3363128	mRNA	+	VDAG_JR2_Chr1g10300.1	0.0	43.0	0	0.9130434782608695	0.1501555249612815
Chr1	3363490	3364901	mRNA	-	VDAG_JR2_Chr1g10310.1	0.0	43.0	0	1.3571428571428572	0.26884531229257996
Chr1	3365115	3365980	mRNA	+	VDAG_JR2_Chr1g10320.1	0.0	43.0	0	0.2222222222222222	-0.14132915279646932
Chr1	3366045	3369109	mRNA	-	VDAG_JR2_Chr1g10330.1	0.0	43.0	0	8.935483870967742	0.9747641765839266
Chr1	3370859	3376026	mRNA	-	VDAG_JR2_Chr1g10340.1	0.0	43.0	0	1.5490196078431373	0.3115461143491364
Chr1	3376362	3379737	mRNA	+	VDAG_JR2_Chr1g10350.1	0.0	43.0	0	0.0	-0.3010299956639812
Chr1	3381310	3385022	mRNA	+	VDAG_JR2_Chr1g10360.1	0.0	43.0	0	0.05405405405405406	-0.2564478630112407
Chr1	3384823	3387130	mRNA	-	VDAG_JR2_Chr1g10370.1	1.0	41.0	0	1.0869565217391304	0.2005650284388818
Chr1	3387387	3388718	mRNA	+	VDAG_JR2_Chr1g10380.1	0.0	43.0	0	0.0	-0.3010299956639812
Chr1	3388883	3390485	mRNA	+	VDAG_JR2_Chr1g10390.1	0.0	43.0	0	5.5625	0.7826517516103201
Chr1	3391073	3393379	mRNA	-	VDAG_JR2_Chr1g10400.1	0.0	43.0	0	0.0	-0.3010299956639812
Chr1	3393716	3397229	mRNA	+	VDAG_JR2_Chr1g10410.1	0.0	43.0	0	0.45714285714285713	-0.01902323731343043
Chr1	3396936	3403055	mRNA	-	VDAG_JR2_Chr1g10420.1	2.0	40.0	0	0.8225806451612904	0.12142216288546287
Chr1	3403313	3409568	mRNA	-	VDAG_JR2_Chr1g10430.1	0.0	43.0	0	0.5396825396825397	0.016900750538201302
Chr1	3410794	3415778	mRNA	+	VDAG_JR2_Chr1g10440.1	0.0	43.0	0	0.38	-0.05551732784983137
Chr1	3415726	3417436	mRNA	-	VDAG_JR2_Chr1g10450.1	12.0	30.0	0	8.470588235294118	0.9528209223045307
Chr1	3417676	3419698	mRNA	-	VDAG_JR2_Chr1g10460.1	0.0	43.0	0	0.3	-0.09691001300805639
Chr1	3421136	3423680	mRNA	-	VDAG_JR2_Chr1g10470.1	0.0	43.0	0	0.11538461538461539	-0.21085336531489315
Chr1	3425984	3427332	mRNA	+	VDAG_JR2_Chr1g10480.1	0.0	43.0	0	0.15384615384615385	-0.18452442659254403
Chr1	3428959	3430196	mRNA	+	VDAG_JR2_Chr1g10490.1	0.0	43.0	0	0.0	-0.3010299956639812
Chr1	3432775	3434320	mRNA	+	VDAG_JR2_Chr1g10500.1	0.0	43.0	0	0.0	-0.3010299956639812
Chr1	3436237	3441156	mRNA	-	VDAG_JR2_Chr1g10510.1	0.0	43.0	0	0.28	-0.10790539730951958
Chr1	3441432	3443331	mRNA	+	VDAG_JR2_Chr1g10520.1	1.0	41.0	0	0.05263157894736842	-0.2575643018828909
Chr1	3443544	3446372	mRNA	+	VDAG_JR2_Chr1g10530.1	0.0	43.0	0	2.6551724137931036	0.49902309616749224
Chr1	3446431	3448995	mRNA	-	VDAG_JR2_Chr1g10540.1	0.0	43.0	0	0.2692307692307692	-0.1139433523068368
Chr1	3449610	3452951	mRNA	+	VDAG_JR2_Chr1g10550.1	0.0	43.0	0	0.23529411764705882	-0.13353890837021748
Chr1	3452915	3454324	mRNA	-	VDAG_JR2_Chr1g10560.1	3.0	39.0	0	3.7142857142857144	0.6247239759639062
Chr1	3454810	3455967	mRNA	+	VDAG_JR2_Chr1g10570.1	0.0	43.0	0	0.0	-0.3010299956639812
Chr1	3455790	3457915	mRNA	-	VDAG_JR2_Chr1g10580.1	0.0	43.0	0	0.6666666666666666	0.06694678963061314
Chr1	3458253	3460161	mRNA	-	VDAG_JR2_Chr1g10590.1	0.0	43.0	0	1.2105263157894737	0.2331297600260454
Chr1	3460349	3462085	mRNA	-	VDAG_JR2_Chr1g10600.1	0.0	43.0	0	5.888888888888889	0.8054253352503057
Chr1	3461933	3463755	mRNA	-	VDAG_JR2_Chr1g10610.1	0.0	43.0	0	0.0	-0.3010299956639812
Chr1	3463724	3464689	mRNA	-	VDAG_JR2_Chr1g10620.1	0.0	43.0	0	0.0	-0.3010299956639812
Chr1	3467069	3468151	mRNA	+	VDAG_JR2_Chr1g10630.1	0.0	43.0	0	0.0	-0.3010299956639812
Chr1	3468269	3469865	mRNA	-	VDAG_JR2_Chr1g10640.1	0.0	43.0	0	0.8125	0.11809931207799448
Chr1	3469904	3471359	mRNA	+	VDAG_JR2_Chr1g10650.1	0.0	43.0	0	0.0	-0.3010299956639812
Chr1	3471980	3475846	mRNA	-	VDAG_JR2_Chr1g10660.1	0.0	43.0	0	0.6578947368421053	0.0636690798693773
Chr1	3476198	3478006	mRNA	+	VDAG_JR2_Chr1g10670.1	0.0	43.0	0	0.3333333333333333	-0.07918124604762487
Chr1	3478070	3479487	mRNA	-	VDAG_JR2_Chr1g10680.1	0.0	43.0	0	3.7857142857142856	0.6320232147054056
Chr1	3479964	3481025	mRNA	-	VDAG_JR2_Chr1g10690.1	0.0	43.0	0	10.6	1.0453229787866574
Chr1	3481183	3482859	mRNA	-	VDAG_JR2_Chr1g10700.1	0.0	43.0	0	0.11764705882352941	-0.20925962230833584
Chr1	3483259	3487894	mRNA	-	VDAG_JR2_Chr1g10710.1	0.0	43.0	0	0.0	-0.3010299956639812
Chr1	3488433	3491385	mRNA	+	VDAG_JR2_Chr1g10720.1	0.0	43.0	0	0.0	-0.3010299956639812
Chr1	3491748	3492625	mRNA	+	VDAG_JR2_Chr1g10730.1	0.0	43.0	0	0.0	-0.3010299956639812
Chr1	3492649	3493581	mRNA	-	VDAG_JR2_Chr1g10740.1	0.0	43.0	0	0.0	-0.3010299956639812
Chr1	3493813	3496480	mRNA	+	VDAG_JR2_Chr1g10750.1	0.0	43.0	0	0.18518518518518517	-0.16419203575597355
Chr1	3498155	3499397	mRNA	+	VDAG_JR2_Chr1g10760.1	0.0	43.0	0	0.0	-0.3010299956639812
Chr1	3499262	3501472	mRNA	+	VDAG_JR2_Chr1g10770.1	0.0	43.0	0	0.13636363636363635	-0.19629464514396822
Chr1	3501867	3502982	mRNA	+	VDAG_JR2_Chr1g10780.1	0.0	43.0	0	0.0	-0.3010299956639812
Chr1	3503245	3505070	mRNA	+	VDAG_JR2_Chr1g10790.1	0.0	43.0	0	0.05263157894736842	-0.2575643018828909
Chr1	3506274	3507640	mRNA	+	VDAG_JR2_Chr1g10800.1	0.0	43.0	0	0.0	-0.3010299956639812
Chr1	3511126	3515604	mRNA	+	VDAG_JR2_Chr1g10810.1	0.0	43.0	0	0.022222222222222223	-0.2821446515036074
Chr1	3515851	3518917	mRNA	+	VDAG_JR2_Chr1g10820.1	0.0	43.0	0	0.0	-0.3010299956639812
Chr1	3518867	3520801	mRNA	+	VDAG_JR2_Chr1g10830.1	0.0	43.0	0	8.894736842105264	0.9728846194953831
Chr1	3520619	3524605	mRNA	-	VDAG_JR2_Chr1g10840.1	12.0	30.0	0	0.55	0.021189299069938092
Chr1	3525138	3527277	mRNA	+	VDAG_JR2_Chr1g10850.1	0.0	43.0	0	0.0	-0.3010299956639812
Chr1	3527232	3530242	mRNA	-	VDAG_JR2_Chr1g10860.1	0.0	43.0	0	0.0	-0.3010299956639812
Chr1	3530665	3535514	mRNA	+	VDAG_JR2_Chr1g10870.1	0.0	43.0	0	0.3541666666666667	-0.06845738065585169
Chr1	3535822	3536557	mRNA	+	VDAG_JR2_Chr1g10880.1	7.0	35.0	0	1.625	0.32735893438633035
Chr1	3536332	3538078	mRNA	-	VDAG_JR2_Chr1g10890.1	0.0	43.0	0	1.6111111111111112	0.3245110915135041
Chr1	3539564	3541430	mRNA	-	VDAG_JR2_Chr1g10900.1	0.0	43.0	0	0.0	-0.3010299956639812
Chr1	3541727	3545042	mRNA	+	VDAG_JR2_Chr1g10910.1	0.0	43.0	0	0.0	-0.3010299956639812
Chr1	3544930	3548641	mRNA	-	VDAG_JR2_Chr1g10920.1	0.0	43.0	0	0.0	-0.3010299956639812
Chr1	3549653	3551025	mRNA	+	VDAG_JR2_Chr1g10930.1	0.0	43.0	0	0.0	-0.3010299956639812
Chr1	3551111	3552039	mRNA	-	VDAG_JR2_Chr1g10940.1	0.0	43.0	0	0.0	-0.3010299956639812
Chr1	3552531	3553276	mRNA	+	VDAG_JR2_Chr1g10950.1	0.0	43.0	0	0.0	-0.3010299956639812
Chr1	3554015	3556195	mRNA	+	VDAG_JR2_Chr1g10960.1	0.0	43.0	0	0.0	-0.3010299956639812
Chr1	3556297	3557095	mRNA	-	VDAG_JR2_Chr1g10970.1	0.0	43.0	0	0.0	-0.3010299956639812
Chr1	3557234	3562367	mRNA	-	VDAG_JR2_Chr1g10980.1	1.0	41.0	0	0.07692307692307693	-0.23888208891513676
Chr1	3562769	3564049	mRNA	-	VDAG_JR2_Chr1g10990.1	0.0	43.0	0	0.0	-0.3010299956639812
Chr1	3565717	3566812	mRNA	+	VDAG_JR2_Chr1g11000.1	0.0	43.0	0	0.0	-0.3010299956639812
Chr1	3569101	3572779	mRNA	+	VDAG_JR2_Chr1g11010.1	0.0	43.0	0	0.0	-0.3010299956639812
Chr1	3573036	3573825	mRNA	+	VDAG_JR2_Chr1g11020.1	0.0	43.0	0	0.0	-0.3010299956639812
Chr1	3573885	3576655	mRNA	-	VDAG_JR2_Chr1g11030.1	0.0	43.0	0	1.2857142857142858	0.2518119729937996
Chr1	3576995	3578960	mRNA	+	VDAG_JR2_Chr1g11040.1	0.0	43.0	0	0.2	-0.1549019599857432
Chr1	3578887	3580281	mRNA	-	VDAG_JR2_Chr1g11050.1	1.0	41.0	0	3.2857142857142856	0.578147833922551
Chr1	3581810	3583118	mRNA	-	VDAG_JR2_Chr1g11060.1	0.0	43.0	0	0.0	-0.3010299956639812
Chr1	3583166	3584322	mRNA	-	VDAG_JR2_Chr1g11070.1	0.0	43.0	0	0.0	-0.3010299956639812
Chr1	3591985	3594181	mRNA	-	VDAG_JR2_Chr1g11080.1	0.0	43.0	0	0.045454545454545456	-0.26324143477458145
Chr1	3594079	3595319	mRNA	-	VDAG_JR2_Chr1g11090.1	0.0	43.0	0	4.416666666666667	0.6916707655945193
Chr1	3595474	3596294	mRNA	-	VDAG_JR2_Chr1g11100.1	0.0	43.0	0	0.0	-0.3010299956639812
Chr1	3596547	3597964	mRNA	+	VDAG_JR2_Chr1g11110.1	0.0	43.0	0	9.133333333333333	0.9837765880368854
Chr1	3597915	3598575	mRNA	+	VDAG_JR2_Chr1g11120.1	0.0	43.0	0	0.0	-0.3010299956639812
Chr1	3598475	3602135	mRNA	-	VDAG_JR2_Chr1g11130.1	0.0	43.0	0	0.0	-0.3010299956639812
Chr1	3604240	3604750	mRNA	-	VDAG_JR2_Chr1g11140.1	0.0	43.0	0	0.0	-0.3010299956639812
Chr1	3606749	3610291	mRNA	-	VDAG_JR2_Chr1g11150.1	0.0	43.0	0	0.0	-0.3010299956639812
Chr1	3610503	3612299	mRNA	+	VDAG_JR2_Chr1g11160.1	0.0	43.0	0	0.0	-0.3010299956639812
Chr1	3612231	3612681	mRNA	+	VDAG_JR2_Chr1g11170.1	0.0	43.0	0	0.0	-0.3010299956639812
Chr1	3612984	3613827	mRNA	-	VDAG_JR2_Chr1g11180.1	0.0	43.0	0	0.0	-0.3010299956639812
Chr1	3613958	3614867	mRNA	+	VDAG_JR2_Chr1g11190.1	0.0	43.0	0	0.0	-0.3010299956639812
Chr1	3615630	3617391	mRNA	+	VDAG_JR2_Chr1g11200.1	0.0	43.0	0	0.0	-0.3010299956639812
Chr1	3617532	3618447	mRNA	-	VDAG_JR2_Chr1g11210.1	0.0	43.0	0	0.0	-0.3010299956639812
Chr1	3618751	3620323	mRNA	+	VDAG_JR2_Chr1g11220.1	0.0	43.0	0	1.0666666666666667	0.19497660321605503
Chr1	3620589	3622548	mRNA	+	VDAG_JR2_Chr1g11230.1	0.0	43.0	0	0.10526315789473684	-0.21805576059921727
Chr1	3623043	3624087	mRNA	+	VDAG_JR2_Chr1g11240.1	0.0	43.0	0	0.0	-0.3010299956639812
Chr1	3624055	3625177	mRNA	-	VDAG_JR2_Chr1g11250.1	0.0	43.0	0	0.0	-0.3010299956639812
Chr1	3625193	3626052	mRNA	-	VDAG_JR2_Chr1g11260.1	0.0	43.0	0	0.0	-0.3010299956639812
Chr1	3626219	3627001	mRNA	+	VDAG_JR2_Chr1g11270.1	0.0	43.0	0	0.0	-0.3010299956639812
Chr1	3626924	3627730	mRNA	+	VDAG_JR2_Chr1g11280.1	0.0	43.0	0	0.0	-0.3010299956639812
Chr1	3627710	3628855	mRNA	-	VDAG_JR2_Chr1g11290.1	0.0	43.0	0	0.0	-0.3010299956639812
Chr1	3629007	3629728	mRNA	+	VDAG_JR2_Chr1g11300.1	0.0	43.0	0	0.0	-0.3010299956639812
Chr1	3629735	3631092	mRNA	-	VDAG_JR2_Chr1g11310.1	0.0	43.0	0	0.0	-0.3010299956639812
Chr1	3631272	3633569	mRNA	-	VDAG_JR2_Chr1g11320.1	0.0	43.0	0	0.0	-0.3010299956639812
Chr1	3633547	3635337	mRNA	+	VDAG_JR2_Chr1g11330.1	0.0	43.0	0	0.0	-0.3010299956639812
Chr1	3635650	3640284	mRNA	+	VDAG_JR2_Chr1g11340.1	0.0	43.0	0	0.02127659574468085	-0.282931773571185
Chr1	3640502	3642481	mRNA	-	VDAG_JR2_Chr1g11350.1	13.0	29.0	0	3.85	0.6384892569546373
Chr1	3643208	3645175	mRNA	-	VDAG_JR2_Chr1g11360.1	0.0	43.0	0	0.0	-0.3010299956639812
Chr1	3645429	3647950	mRNA	+	VDAG_JR2_Chr1g11370.1	0.0	43.0	0	0.0	-0.3010299956639812
Chr1	3649948	3650752	mRNA	-	VDAG_JR2_Chr1g11380.1	0.0	43.0	0	0.0	-0.3010299956639812
Chr1	3650647	3651402	mRNA	-	VDAG_JR2_Chr1g11390.1	0.0	43.0	0	0.0	-0.3010299956639812
Chr1	3651421	3652159	mRNA	-	VDAG_JR2_Chr1g11400.1	0.0	43.0	0	0.0	-0.3010299956639812
Chr1	3653589	3654678	mRNA	-	VDAG_JR2_Chr1g11410.1	0.0	43.0	0	0.0	-0.3010299956639812
Chr1	3654221	3655492	mRNA	-	VDAG_JR2_Chr1g11420.1	0.0	43.0	0	0.0	-0.3010299956639812
Chr1	3656471	3659263	mRNA	-	VDAG_JR2_Chr1g11430.1	0.0	43.0	0	0.0	-0.3010299956639812
Chr1	3659294	3660192	mRNA	-	VDAG_JR2_Chr1g11440.1	0.0	43.0	0	0.0	-0.3010299956639812
Chr1	3661517	3664486	mRNA	-	VDAG_JR2_Chr1g11450.1	0.0	43.0	0	0.3333333333333333	-0.07918124604762487
Chr1	3665036	3665904	mRNA	-	VDAG_JR2_Chr1g11460.1	0.0	43.0	0	0.0	-0.3010299956639812
Chr1	3665917	3667503	mRNA	+	VDAG_JR2_Chr1g11470.1	0.0	43.0	0	0.0	-0.3010299956639812
Chr1	3667556	3669033	mRNA	-	VDAG_JR2_Chr1g11480.1	0.0	43.0	0	0.0	-0.3010299956639812
Chr1	3669227	3670243	mRNA	+	VDAG_JR2_Chr1g11490.1	0.0	43.0	0	0.0	-0.3010299956639812
Chr1	3670122	3672565	mRNA	-	VDAG_JR2_Chr1g11500.1	0.0	43.0	0	0.0	-0.3010299956639812
Chr1	3672877	3678271	mRNA	+	VDAG_JR2_Chr1g11510.1	0.0	43.0	0	0.0	-0.3010299956639812
Chr1	3679053	3680146	mRNA	+	VDAG_JR2_Chr1g11520.1	0.0	43.0	0	0.0	-0.3010299956639812
Chr1	3680742	3684323	mRNA	+	VDAG_JR2_Chr1g11530.1	0.0	43.0	0	0.0	-0.3010299956639812
Chr1	3684505	3686398	mRNA	+	VDAG_JR2_Chr1g11540.1	0.0	43.0	0	0.42105263157894735	-0.035715552266534535
Chr1	3687268	3688716	mRNA	+	VDAG_JR2_Chr1g11550.1	0.0	43.0	0	0.0	-0.3010299956639812
Chr1	3688687	3690429	mRNA	-	VDAG_JR2_Chr1g11560.1	0.0	43.0	0	0.4117647058823529	-0.04011722320798245
Chr1	3690749	3691681	mRNA	-	VDAG_JR2_Chr1g11570.1	0.0	43.0	0	0.0	-0.3010299956639812
Chr1	3693277	3695109	mRNA	+	VDAG_JR2_Chr1g11580.1	0.0	43.0	0	0.05555555555555555	-0.25527250510330607
Chr1	3695073	3696135	mRNA	-	VDAG_JR2_Chr1g11590.1	0.0	43.0	0	0.2	-0.1549019599857432
Chr1	3696654	3698644	mRNA	-	VDAG_JR2_Chr1g11600.1	0.0	43.0	0	0.0	-0.3010299956639812
Chr1	3700710	3702339	mRNA	+	VDAG_JR2_Chr1g11610.1	0.0	43.0	0	0.0	-0.3010299956639812
Chr1	3702605	3704302	mRNA	-	VDAG_JR2_Chr1g11620.1	0.0	43.0	0	0.6470588235294118	0.05958568998424405
Chr1	3704574	3705628	mRNA	+	VDAG_JR2_Chr1g11630.1	0.0	43.0	0	0.0	-0.3010299956639812
Chr1	3706911	3708382	mRNA	+	VDAG_JR2_Chr1g11640.1	0.0	43.0	0	0.0	-0.3010299956639812
Chr1	3709378	3712311	mRNA	+	VDAG_JR2_Chr1g11650.1	0.0	43.0	0	0.0	-0.3010299956639812
Chr1	3713075	3714387	mRNA	+	VDAG_JR2_Chr1g11660.1	0.0	43.0	0	0.0	-0.3010299956639812
Chr1	3715110	3715923	mRNA	-	VDAG_JR2_Chr1g11670.1	0.0	43.0	0	0.0	-0.3010299956639812
Chr1	3716004	3716662	mRNA	-	VDAG_JR2_Chr1g11680.1	0.0	43.0	0	0.0	-0.3010299956639812
Chr1	3716879	3718280	mRNA	-	VDAG_JR2_Chr1g11690.1	0.0	43.0	0	0.0	-0.3010299956639812
Chr1	3719199	3721558	mRNA	+	VDAG_JR2_Chr1g11700.1	9.0	33.0	0	5.625	0.7871060930365701
Chr1	3721828	3723528	mRNA	-	VDAG_JR2_Chr1g11710.1	5.0	37.0	1	5.0	0.7403626894942439
Chr1	3724640	3727307	mRNA	+	VDAG_JR2_Chr1g11720.1	5.0	37.0	1	5.0	0.7403626894942439
Chr1	3795630	3796593	mRNA	-	VDAG_JR2_Chr1g11730.1	0.0	43.0	0	0.3	-0.09691001300805639
Chr1	3799584	3803644	mRNA	+	VDAG_JR2_Chr1g11740.1	0.0	43.0	0	0.3	-0.09691001300805639
Chr1	3804038	3804861	mRNA	+	VDAG_JR2_Chr1g11750.1	0.0	43.0	0	0.0	-0.3010299956639812
Chr1	3805664	3809169	mRNA	-	VDAG_JR2_Chr1g11760.1	0.0	43.0	0	0.0	-0.3010299956639812
Chr1	3809463	3811606	mRNA	+	VDAG_JR2_Chr1g11770.1	0.0	43.0	0	0.047619047619047616	-0.26152145438030755
Chr1	3811483	3814066	mRNA	-	VDAG_JR2_Chr1g11780.1	0.0	43.0	0	0.038461538461538464	-0.26884531229257996
Chr1	3814123	3815680	mRNA	+	VDAG_JR2_Chr1g11790.1	0.0	43.0	0	0.0	-0.3010299956639812
Chr1	3815641	3816565	mRNA	-	VDAG_JR2_Chr1g11800.1	0.0	43.0	0	0.0	-0.3010299956639812
Chr1	3817072	3820165	mRNA	+	VDAG_JR2_Chr1g11810.1	0.0	43.0	0	0.03225806451612903	-0.27387774962036643
Chr1	3820940	3821678	mRNA	-	VDAG_JR2_Chr1g11820.1	0.0	43.0	0	0.0	-0.3010299956639812
Chr1	3822194	3824540	mRNA	+	VDAG_JR2_Chr1g11830.1	0.0	43.0	0	0.0	-0.3010299956639812
Chr1	3828077	3833005	mRNA	-	VDAG_JR2_Chr1g11840.1	0.0	43.0	0	0.0	-0.3010299956639812
Chr1	3834807	3835348	mRNA	-	VDAG_JR2_Chr1g11850.1	0.0	43.0	0	0.0	-0.3010299956639812
Chr1	3835633	3836180	mRNA	+	VDAG_JR2_Chr1g11860.1	0.0	43.0	0	0.0	-0.3010299956639812
Chr1	3838895	3840655	mRNA	-	VDAG_JR2_Chr1g11870.1	0.0	43.0	0	0.05555555555555555	-0.25527250510330607
Chr1	3840838	3844632	mRNA	+	VDAG_JR2_Chr1g11880.1	0.0	43.0	0	1.3421052631578947	0.26531444339744664
Chr1	3844614	3847302	mRNA	-	VDAG_JR2_Chr1g11890.1	0.0	43.0	0	0.0	-0.3010299956639812
Chr1	3847882	3851598	mRNA	-	VDAG_JR2_Chr1g11900.1	1.0	41.0	0	0.16216216216216217	-0.17903563970246253
Chr1	3851813	3855392	mRNA	-	VDAG_JR2_Chr1g11910.1	0.0	43.0	0	0.0	-0.3010299956639812
Chr1	3856092	3857208	mRNA	-	VDAG_JR2_Chr1g11920.1	0.0	43.0	0	0.0	-0.3010299956639812
Chr1	3857504	3860377	mRNA	-	VDAG_JR2_Chr1g11930.1	0.0	43.0	0	0.034482758620689655	-0.27206629972866464
Chr1	3862519	3865789	mRNA	+	VDAG_JR2_Chr1g11940.1	0.0	43.0	0	0.0	-0.3010299956639812
Chr1	3865544	3868214	mRNA	-	VDAG_JR2_Chr1g11950.1	0.0	43.0	0	0.0	-0.3010299956639812
Chr1	3868569	3869551	mRNA	+	VDAG_JR2_Chr1g11960.1	0.0	43.0	0	0.0	-0.3010299956639812
Chr1	3869327	3871896	mRNA	-	VDAG_JR2_Chr1g11970.1	0.0	43.0	0	0.038461538461538464	-0.26884531229257996
Chr1	3872153	3876424	mRNA	+	VDAG_JR2_Chr1g11980.1	0.0	43.0	0	0.0	-0.3010299956639812
Chr1	3877331	3878806	mRNA	-	VDAG_JR2_Chr1g11990.1	0.0	43.0	0	0.0	-0.3010299956639812
Chr1	3883327	3885347	mRNA	+	VDAG_JR2_Chr1g12000.1	0.0	43.0	0	0.05	-0.2596373105057561
Chr1	3885537	3888531	mRNA	-	VDAG_JR2_Chr1g12010.1	0.0	43.0	0	0.13333333333333333	-0.1983676537668335
Chr1	3888856	3890546	mRNA	+	VDAG_JR2_Chr1g12020.1	0.0	43.0	0	0.0	-0.3010299956639812
Chr1	3890494	3893561	mRNA	-	VDAG_JR2_Chr1g12030.1	0.0	43.0	0	3.3870967741935485	0.5896253530766146
Chr1	3894948	3895886	mRNA	-	VDAG_JR2_Chr1g12040.1	0.0	43.0	0	0.0	-0.3010299956639812
Chr1	3896297	3897798	mRNA	-	VDAG_JR2_Chr1g12050.1	0.0	43.0	0	0.0	-0.3010299956639812
Chr1	3898302	3900560	mRNA	+	VDAG_JR2_Chr1g12060.1	0.0	43.0	0	1.9130434782608696	0.3825651471050834
Chr1	3900675	3901820	mRNA	-	VDAG_JR2_Chr1g12070.1	0.0	43.0	0	0.2727272727272727	-0.11197375944393231
Chr1	3902308	3903484	mRNA	-	VDAG_JR2_Chr1g12080.1	0.0	43.0	0	0.0	-0.3010299956639812
Chr1	3903521	3907176	mRNA	-	VDAG_JR2_Chr1g12090.1	0.0	43.0	0	0.0	-0.3010299956639812
Chr1	3907500	3909469	mRNA	+	VDAG_JR2_Chr1g12100.1	0.0	43.0	0	0.0	-0.3010299956639812
Chr1	3909697	3912475	mRNA	-	VDAG_JR2_Chr1g12110.1	0.0	43.0	0	0.0	-0.3010299956639812
Chr1	3913058	3913796	mRNA	-	VDAG_JR2_Chr1g12120.1	0.0	43.0	0	0.0	-0.3010299956639812
Chr1	3914107	3914919	mRNA	+	VDAG_JR2_Chr1g12130.1	0.0	43.0	0	0.125	-0.2041199826559248
Chr1	3914867	3917376	mRNA	-	VDAG_JR2_Chr1g12140.1	0.0	43.0	0	0.0	-0.3010299956639812
Chr1	3917820	3920595	mRNA	-	VDAG_JR2_Chr1g12150.1	0.0	43.0	0	0.0	-0.3010299956639812
Chr1	3920932	3925982	mRNA	+	VDAG_JR2_Chr1g12160.1	0.0	43.0	0	0.0	-0.3010299956639812
Chr1	3926148	3928256	mRNA	-	VDAG_JR2_Chr1g12170.1	0.0	43.0	0	0.3181818181818182	-0.0871501757189002
Chr1	3928525	3930506	mRNA	-	VDAG_JR2_Chr1g12180.1	0.0	43.0	0	0.0	-0.3010299956639812
Chr1	3930752	3932020	mRNA	+	VDAG_JR2_Chr1g12190.1	0.0	43.0	0	0.0	-0.3010299956639812
Chr1	3932448	3934646	mRNA	-	VDAG_JR2_Chr1g12200.1	4.0	38.0	0	0.18181818181818182	-0.16633142176652496
Chr1	3935223	3937372	mRNA	+	VDAG_JR2_Chr1g12210.1	0.0	43.0	0	0.0	-0.3010299956639812
Chr1	3937700	3940094	mRNA	+	VDAG_JR2_Chr1g12220.1	0.0	43.0	0	0.125	-0.2041199826559248
Chr1	3940395	3942627	mRNA	+	VDAG_JR2_Chr1g12230.1	0.0	43.0	0	0.0	-0.3010299956639812
Chr1	3942666	3944972	mRNA	-	VDAG_JR2_Chr1g12240.1	0.0	43.0	0	0.0	-0.3010299956639812
Chr1	3945810	3947995	mRNA	+	VDAG_JR2_Chr1g12250.1	0.0	43.0	0	0.0	-0.3010299956639812
Chr1	3947898	3953120	mRNA	-	VDAG_JR2_Chr1g12260.1	0.0	43.0	0	0.0	-0.3010299956639812
Chr1	3954644	3957078	mRNA	+	VDAG_JR2_Chr1g12270.1	0.0	43.0	0	7.08	0.8796692056320535
Chr1	3957298	3960649	mRNA	-	VDAG_JR2_Chr1g12280.1	0.0	43.0	0	1.0909090909090908	0.2016453635280694
Chr1	3961066	3963983	mRNA	-	VDAG_JR2_Chr1g12290.1	0.0	43.0	0	0.3448275862068966	-0.07323191353442361
Chr1	3965104	3966477	mRNA	+	VDAG_JR2_Chr1g12300.1	5.0	37.0	0	0.9285714285714286	0.1549019599857432
Chr1	3968196	3969057	mRNA	-	VDAG_JR2_Chr1g12310.1	1.0	41.0	0	3.0	0.5440680443502757
Chr1	3969253	3971084	mRNA	+	VDAG_JR2_Chr1g12320.1	0.0	43.0	0	0.3888888888888889	-0.05115252244738131
Chr1	3972752	3974124	mRNA	-	VDAG_JR2_Chr1g12330.1	0.0	43.0	0	0.0	-0.3010299956639812
Chr1	3976445	3982497	mRNA	+	VDAG_JR2_Chr1g12340.1	0.0	43.0	0	0.0	-0.3010299956639812
Chr1	3982806	3985062	mRNA	-	VDAG_JR2_Chr1g12350.1	0.0	43.0	0	0.0	-0.3010299956639812
Chr1	3986897	3988335	mRNA	+	VDAG_JR2_Chr1g12360.1	0.0	43.0	0	0.0	-0.3010299956639812
Chr1	3988380	3990012	mRNA	-	VDAG_JR2_Chr1g12370.1	0.0	43.0	0	0.6875	0.07463361829690418
Chr1	3990299	3993098	mRNA	+	VDAG_JR2_Chr1g12380.1	0.0	43.0	0	1.2857142857142858	0.2518119729937996
Chr1	3993170	3995690	mRNA	-	VDAG_JR2_Chr1g12390.1	0.0	43.0	0	0.0	-0.3010299956639812
Chr1	3995817	3997851	mRNA	-	VDAG_JR2_Chr1g12400.1	0.0	43.0	0	0.0	-0.3010299956639812
Chr1	3997975	3999999	mRNA	+	VDAG_JR2_Chr1g12410.1	0.0	43.0	0	0.0	-0.3010299956639812
Chr1	4001662	4003650	mRNA	-	VDAG_JR2_Chr1g12420.1	0.0	43.0	0	0.0	-0.3010299956639812
Chr1	4009893	4015272	mRNA	-	VDAG_JR2_Chr1g12430.1	0.0	43.0	0	0.037037037037037035	-0.2699957619240125
Chr1	4018099	4020166	mRNA	+	VDAG_JR2_Chr1g12440.1	0.0	43.0	0	4.0476190476190474	0.6577840768498271
Chr1	4019889	4023788	mRNA	-	VDAG_JR2_Chr1g12450.1	2.0	40.0	0	0.05128205128205128	-0.2586261471108938
Chr1	4025220	4026895	mRNA	+	VDAG_JR2_Chr1g12460.1	0.0	43.0	0	0.0	-0.3010299956639812
Chr1	4026796	4029499	mRNA	-	VDAG_JR2_Chr1g12470.1	0.0	43.0	0	0.8888888888888888	0.14266750356873154
Chr1	4029523	4030719	mRNA	+	VDAG_JR2_Chr1g12480.1	1.0	41.0	0	2.5	0.47712125471966244
Chr1	4030778	4033760	mRNA	-	VDAG_JR2_Chr1g12490.1	0.0	43.0	0	0.0	-0.3010299956639812
Chr1	4034499	4036890	mRNA	-	VDAG_JR2_Chr1g12500.1	0.0	43.0	0	0.0	-0.3010299956639812
Chr1	4038033	4039255	mRNA	-	VDAG_JR2_Chr1g12510.1	0.0	43.0	0	0.0	-0.3010299956639812
Chr1	4039408	4040608	mRNA	+	VDAG_JR2_Chr1g12520.1	0.0	43.0	0	0.0	-0.3010299956639812
Chr1	4039408	4040564	mRNA	+	VDAG_JR2_Chr1g12530.1	0.0	43.0	0	0.0	-0.3010299956639812
Chr1	4040663	4042307	mRNA	-	VDAG_JR2_Chr1g12540.1	0.0	43.0	0	0.0	-0.3010299956639812
Chr1	4043334	4044764	mRNA	+	VDAG_JR2_Chr1g12550.1	0.0	43.0	0	0.13333333333333333	-0.1983676537668335
Chr1	4044795	4045846	mRNA	-	VDAG_JR2_Chr1g12560.1	0.0	43.0	0	0.0	-0.3010299956639812
Chr1	4046982	4048738	mRNA	+	VDAG_JR2_Chr1g12570.1	0.0	43.0	0	0.11764705882352941	-0.20925962230833584
Chr1	4048582	4049909	mRNA	+	VDAG_JR2_Chr1g12580.1	2.0	40.0	0	0.6923076923076923	0.0763883458634547
Chr1	4050215	4051418	mRNA	-	VDAG_JR2_Chr1g12590.1	0.0	43.0	0	2.0	0.3979400086720376
Chr1	4051555	4052533	mRNA	-	VDAG_JR2_Chr1g12600.1	0.0	43.0	0	0.0	-0.3010299956639812
Chr1	4052913	4055944	mRNA	-	VDAG_JR2_Chr1g12610.1	0.0	43.0	0	0.6666666666666666	0.06694678963061314
Chr1	4056299	4058139	mRNA	+	VDAG_JR2_Chr1g12620.1	0.0	43.0	0	0.4444444444444444	-0.024823583725032152
Chr1	4059182	4062045	mRNA	+	VDAG_JR2_Chr1g12630.1	0.0	43.0	0	0.0	-0.3010299956639812
Chr1	4062725	4063976	mRNA	-	VDAG_JR2_Chr1g12640.1	0.0	43.0	0	0.0	-0.3010299956639812
Chr1	4064021	4065761	mRNA	+	VDAG_JR2_Chr1g12650.1	0.0	43.0	0	0.0	-0.3010299956639812
Chr1	4065938	4067848	mRNA	+	VDAG_JR2_Chr1g12660.1	0.0	43.0	0	2.3684210526315788	0.45764290132381347
Chr1	4068086	4070714	mRNA	-	VDAG_JR2_Chr1g12670.1	0.0	43.0	0	0.2692307692307692	-0.1139433523068368
Chr1	4071667	4073495	mRNA	-	VDAG_JR2_Chr1g12680.1	0.0	43.0	0	0.0	-0.3010299956639812
Chr1	4074156	4075340	mRNA	-	VDAG_JR2_Chr1g12690.1	0.0	43.0	0	0.0	-0.3010299956639812
Chr1	4075501	4079095	mRNA	-	VDAG_JR2_Chr1g12700.1	0.0	43.0	0	0.0	-0.3010299956639812
Chr1	4082393	4084845	mRNA	+	VDAG_JR2_Chr1g12710.1	0.0	43.0	0	0.0	-0.3010299956639812
Chr1	4089589	4091520	mRNA	-	VDAG_JR2_Chr1g12720.1	0.0	43.0	0	0.0	-0.3010299956639812
Chr1	4092463	4095432	mRNA	+	VDAG_JR2_Chr1g12730.1	0.0	43.0	0	0.0	-0.3010299956639812
Chr1	4095409	4096221	mRNA	-	VDAG_JR2_Chr1g12740.1	0.0	43.0	0	0.0	-0.3010299956639812
Chr1	4097882	4098408	mRNA	+	VDAG_JR2_Chr1g12750.1	0.0	43.0	0	0.0	-0.3010299956639812
Chr1	4100815	4101592	mRNA	-	VDAG_JR2_Chr1g12760.1	0.0	43.0	0	0.375	-0.057991946977686754
Chr1	4102762	4108689	mRNA	+	VDAG_JR2_Chr1g12770.1	0.0	43.0	0	0.01694915254237288	-0.2865521722953584
Chr1	4109133	4110260	mRNA	+	VDAG_JR2_Chr1g12780.1	4.0	38.0	0	1.75	0.3521825181113625
Chr1	4110285	4111401	mRNA	-	VDAG_JR2_Chr1g12790.1	0.0	43.0	0	0.0	-0.3010299956639812
Chr1	4111907	4113229	mRNA	+	VDAG_JR2_Chr1g12800.1	0.0	43.0	0	0.15384615384615385	-0.18452442659254403
Chr1	4113229	4115392	mRNA	-	VDAG_JR2_Chr1g12810.1	0.0	43.0	0	0.36363636363636365	-0.06366907986937727
Chr1	4116519	4117482	mRNA	+	VDAG_JR2_Chr1g12820.1	0.0	43.0	0	0.3	-0.09691001300805639
Chr1	4117818	4119488	mRNA	-	VDAG_JR2_Chr1g12830.1	0.0	43.0	0	0.0	-0.3010299956639812
Chr1	4121259	4122898	mRNA	+	VDAG_JR2_Chr1g12840.1	0.0	43.0	0	0.0	-0.3010299956639812
Chr1	4123808	4127860	mRNA	+	VDAG_JR2_Chr1g12850.1	0.0	43.0	0	0.0	-0.3010299956639812
Chr1	4127955	4130637	mRNA	-	VDAG_JR2_Chr1g12860.1	0.0	43.0	0	0.23076923076923078	-0.13621974701798897
Chr1	4131728	4133926	mRNA	-	VDAG_JR2_Chr1g12870.1	0.0	43.0	0	2.3181818181818183	0.44996900867604767
Chr1	4133920	4135811	mRNA	-	VDAG_JR2_Chr1g12880.1	0.0	43.0	0	0.0	-0.3010299956639812
Chr1	4133984	4135761	mRNA	-	VDAG_JR2_Chr1g12890.1	0.0	43.0	0	0.0	-0.3010299956639812
Chr1	4136054	4137104	mRNA	+	VDAG_JR2_Chr1g12900.1	0.0	43.0	0	0.0	-0.3010299956639812
Chr1	4136868	4138102	mRNA	-	VDAG_JR2_Chr1g12910.1	0.0	43.0	0	0.0	-0.3010299956639812
Chr1	4139336	4142357	mRNA	-	VDAG_JR2_Chr1g12920.1	0.0	43.0	0	0.0	-0.3010299956639812
Chr1	4142754	4144090	mRNA	-	VDAG_JR2_Chr1g12930.1	0.0	43.0	0	0.0	-0.3010299956639812
Chr1	4144879	4147427	mRNA	-	VDAG_JR2_Chr1g12940.1	0.0	43.0	0	0.36	-0.06550154875643228
Chr1	4148258	4151669	mRNA	-	VDAG_JR2_Chr1g12950.1	0.0	43.0	0	0.0	-0.3010299956639812
Chr1	4154737	4156560	mRNA	+	VDAG_JR2_Chr1g12960.1	0.0	43.0	0	0.0	-0.3010299956639812
Chr1	4157859	4158215	mRNA	+	VDAG_JR2_Chr1g12970.1	0.0	43.0	0	0.0	-0.3010299956639812
Chr1	4161111	4162001	mRNA	+	VDAG_JR2_Chr1g12980.1	4.0	38.0	0	0.6666666666666666	0.06694678963061314
Chr1	4161935	4162942	mRNA	+	VDAG_JR2_Chr1g12990.1	0.0	43.0	0	0.0	-0.3010299956639812
Chr1	4163218	4166758	mRNA	+	VDAG_JR2_Chr1g13000.1	0.0	43.0	0	0.0	-0.3010299956639812
Chr1	4169755	4170318	mRNA	-	VDAG_JR2_Chr1g13010.1	0.0	43.0	0	1.6	0.3222192947339193
Chr1	4171234	4174488	mRNA	-	VDAG_JR2_Chr1g13020.1	1.0	41.0	0	0.030303030303030304	-0.27547589119159305
Chr1	4176082	4177161	mRNA	-	VDAG_JR2_Chr1g13030.1	0.0	43.0	0	0.0	-0.3010299956639812
Chr1	4177229	4180523	mRNA	+	VDAG_JR2_Chr1g13040.1	0.0	43.0	0	0.0	-0.3010299956639812
Chr1	4180306	4184012	mRNA	-	VDAG_JR2_Chr1g13050.1	0.0	43.0	0	0.0	-0.3010299956639812
Chr1	4184393	4185261	mRNA	+	VDAG_JR2_Chr1g13060.1	0.0	43.0	0	0.0	-0.3010299956639812
Chr1	4185511	4188863	mRNA	-	VDAG_JR2_Chr1g13070.1	0.0	43.0	0	0.0	-0.3010299956639812
Chr1	4190136	4195157	mRNA	+	VDAG_JR2_Chr1g13080.1	0.0	43.0	0	0.0	-0.3010299956639812
Chr1	4195377	4197022	mRNA	-	VDAG_JR2_Chr1g13090.1	0.0	43.0	0	0.0	-0.3010299956639812
Chr1	4197069	4200002	mRNA	-	VDAG_JR2_Chr1g13100.1	0.0	43.0	0	0.0	-0.3010299956639812
Chr1	4200075	4202402	mRNA	+	VDAG_JR2_Chr1g13110.1	0.0	43.0	0	0.0	-0.3010299956639812
Chr1	4202418	4204422	mRNA	-	VDAG_JR2_Chr1g13120.1	0.0	43.0	0	0.0	-0.3010299956639812
Chr1	4204969	4207293	mRNA	+	VDAG_JR2_Chr1g13130.1	0.0	43.0	0	0.0	-0.3010299956639812
Chr1	4208018	4208806	mRNA	+	VDAG_JR2_Chr1g13140.1	0.0	43.0	0	0.0	-0.3010299956639812
Chr1	4209017	4211400	mRNA	-	VDAG_JR2_Chr1g13150.1	0.0	43.0	0	0.0	-0.3010299956639812
Chr1	4212695	4216652	mRNA	+	VDAG_JR2_Chr1g13160.1	0.0	43.0	0	0.0	-0.3010299956639812
Chr1	4216758	4219239	mRNA	-	VDAG_JR2_Chr1g13170.1	0.0	43.0	0	0.041666666666666664	-0.2662678894047693
Chr1	4219780	4221507	mRNA	-	VDAG_JR2_Chr1g13180.1	0.0	43.0	0	0.0	-0.3010299956639812
Chr1	4221884	4223246	mRNA	-	VDAG_JR2_Chr1g13190.1	0.0	43.0	0	0.0	-0.3010299956639812
Chr1	4224986	4227347	mRNA	-	VDAG_JR2_Chr1g13200.1	0.0	43.0	0	0.0	-0.3010299956639812
Chr1	4227881	4230537	mRNA	-	VDAG_JR2_Chr1g13210.1	0.0	43.0	0	0.0	-0.3010299956639812
Chr1	4230692	4231847	mRNA	+	VDAG_JR2_Chr1g13220.1	0.0	43.0	0	0.0	-0.3010299956639812
Chr1	4233086	4233767	mRNA	-	VDAG_JR2_Chr1g13230.1	0.0	43.0	0	0.0	-0.3010299956639812
Chr1	4233722	4234995	mRNA	-	VDAG_JR2_Chr1g13240.1	0.0	43.0	0	0.0	-0.3010299956639812
Chr1	4235568	4239752	mRNA	+	VDAG_JR2_Chr1g13250.1	0.0	43.0	0	0.0	-0.3010299956639812
Chr1	4241508	4244729	mRNA	+	VDAG_JR2_Chr1g13260.1	0.0	43.0	0	0.0	-0.3010299956639812
Chr1	4246265	4248760	mRNA	+	VDAG_JR2_Chr1g13270.1	0.0	43.0	0	0.08	-0.23657200643706275
Chr1	4248765	4250457	mRNA	-	VDAG_JR2_Chr1g13280.1	0.0	43.0	0	0.11764705882352941	-0.20925962230833584
Chr1	4255664	4257725	mRNA	-	VDAG_JR2_Chr1g13290.1	25.0	17.0	0	20.3	1.3180633349627615
Chr1	4265986	4267437	mRNA	+	VDAG_JR2_Chr1g13300.1	6.0	36.0	0	11.785714285714286	1.089400411229311
Chr1	4283124	4285225	mRNA	+	VDAG_JR2_Chr1g13310.1	0.0	43.0	0	0.0	-0.3010299956639812
Chr1	4285263	4287972	mRNA	-	VDAG_JR2_Chr1g13320.1	0.0	43.0	0	0.0	-0.3010299956639812
Chr1	4288112	4289537	mRNA	+	VDAG_JR2_Chr1g13330.1	0.0	43.0	0	0.0	-0.3010299956639812
Chr1	4289488	4291382	mRNA	-	VDAG_JR2_Chr1g13340.1	0.0	43.0	0	0.0	-0.3010299956639812
Chr1	4294866	4296130	mRNA	+	VDAG_JR2_Chr1g13350.1	0.0	43.0	0	0.08333333333333333	-0.23408320603336796
Chr1	4297357	4300004	mRNA	+	VDAG_JR2_Chr1g13360.1	0.0	43.0	0	0.0	-0.3010299956639812
Chr1	4301958	4303487	mRNA	-	VDAG_JR2_Chr1g13370.1	0.0	43.0	0	0.5333333333333333	0.014240439114610193
Chr1	4304862	4306911	mRNA	-	VDAG_JR2_Chr1g13380.1	1.0	41.0	0	0.05	-0.2596373105057561
Chr1	4308370	4310685	mRNA	+	VDAG_JR2_Chr1g13390.1	2.0	40.0	0	0.13043478260869565	-0.20035983378261796
Chr1	4313006	4317299	mRNA	+	VDAG_JR2_Chr1g13400.1	0.0	43.0	0	0.0	-0.3010299956639812
Chr1	4318081	4320883	mRNA	+	VDAG_JR2_Chr1g13410.1	0.0	43.0	0	0.0	-0.3010299956639812
Chr1	4323768	4332621	mRNA	+	VDAG_JR2_Chr1g13420.1	1.0	41.0	0	0.09090909090909091	-0.22847932851536945
Chr1	4328883	4332594	mRNA	-	VDAG_JR2_Chr1g13430.1	0.0	43.0	0	0.1891891891891892	-0.16166154363303978
Chr1	4332952	4335285	mRNA	+	VDAG_JR2_Chr1g13440.1	0.0	43.0	0	4.391304347826087	0.6894246864297884
Chr1	4336020	4338618	mRNA	+	VDAG_JR2_Chr1g13450.1	0.0	43.0	0	1.0384615384615385	0.18708664335714445
Chr1	4338752	4340187	mRNA	+	VDAG_JR2_Chr1g13460.1	0.0	43.0	0	3.857142857142857	0.6392017993325291
Chr1	4339995	4342837	mRNA	-	VDAG_JR2_Chr1g13470.1	1.0	41.0	0	0.03571428571428571	-0.27106677228653797
Chr1	4343277	4344241	mRNA	+	VDAG_JR2_Chr1g13480.1	0.0	43.0	0	0.0	-0.3010299956639812
Chr1	4345935	4352217	mRNA	-	VDAG_JR2_Chr1g13490.1	0.0	43.0	0	0.0	-0.3010299956639812
Chr1	4352479	4354509	mRNA	+	VDAG_JR2_Chr1g13500.1	0.0	43.0	0	0.8	0.11394335230683679
Chr1	4356072	4358059	mRNA	-	VDAG_JR2_Chr1g13510.1	0.0	43.0	0	0.0	-0.3010299956639812
Chr1	4358835	4359783	mRNA	+	VDAG_JR2_Chr1g13520.1	0.0	43.0	0	0.2	-0.1549019599857432
Chr1	4360556	4362139	mRNA	+	VDAG_JR2_Chr1g13530.1	0.0	43.0	0	0.0	-0.3010299956639812
Chr1	4362392	4363480	mRNA	-	VDAG_JR2_Chr1g13540.1	0.0	43.0	0	0.09090909090909091	-0.22847932851536945
Chr1	4363832	4366070	mRNA	+	VDAG_JR2_Chr1g13550.1	0.0	43.0	0	0.0	-0.3010299956639812
Chr1	4365971	4366565	mRNA	-	VDAG_JR2_Chr1g13560.1	0.0	43.0	0	0.0	-0.3010299956639812
Chr1	4366655	4367025	mRNA	-	VDAG_JR2_Chr1g13570.1	0.0	43.0	0	0.0	-0.3010299956639812
Chr1	4366762	4367502	mRNA	+	VDAG_JR2_Chr1g13580.1	0.0	43.0	0	0.0	-0.3010299956639812
Chr1	4367667	4368299	mRNA	+	VDAG_JR2_Chr1g13590.1	0.0	43.0	0	0.0	-0.3010299956639812
Chr1	4368340	4368762	mRNA	-	VDAG_JR2_Chr1g13600.1	0.0	43.0	0	0.0	-0.3010299956639812
Chr1	4369188	4371183	mRNA	-	VDAG_JR2_Chr1g13610.1	0.0	43.0	0	0.0	-0.3010299956639812
Chr1	4371587	4375204	mRNA	-	VDAG_JR2_Chr1g13620.1	0.0	43.0	0	0.0	-0.3010299956639812
Chr1	4375585	4376430	mRNA	+	VDAG_JR2_Chr1g13630.1	0.0	43.0	0	0.0	-0.3010299956639812
Chr1	4377507	4378630	mRNA	-	VDAG_JR2_Chr1g13640.1	0.0	43.0	0	0.0	-0.3010299956639812
Chr1	4379617	4380415	mRNA	-	VDAG_JR2_Chr1g13650.1	1.0	41.0	0	0.25	-0.12493873660829995
Chr1	4380620	4383875	mRNA	+	VDAG_JR2_Chr1g13660.1	0.0	43.0	0	0.0	-0.3010299956639812
Chr1	4384140	4386346	mRNA	+	VDAG_JR2_Chr1g13670.1	0.0	43.0	0	0.0	-0.3010299956639812
Chr1	4386462	4387882	mRNA	-	VDAG_JR2_Chr1g13680.1	0.0	43.0	0	0.0	-0.3010299956639812
Chr1	4388081	4389770	mRNA	+	VDAG_JR2_Chr1g13690.1	0.0	43.0	0	1.3529411764705883	0.2678616324113266
Chr1	4389431	4393787	mRNA	-	VDAG_JR2_Chr1g13700.1	0.0	43.0	0	0.0	-0.3010299956639812
Chr1	4396378	4397632	mRNA	+	VDAG_JR2_Chr1g13710.1	0.0	43.0	0	0.0	-0.3010299956639812
Chr1	4397731	4400091	mRNA	-	VDAG_JR2_Chr1g13720.1	0.0	43.0	0	0.041666666666666664	-0.2662678894047693
Chr1	4400766	4403704	mRNA	+	VDAG_JR2_Chr1g13730.1	0.0	43.0	0	1.0344827586206897	0.18596201308197552
Chr1	4404088	4405628	mRNA	+	VDAG_JR2_Chr1g13740.1	0.0	43.0	0	0.9333333333333333	0.1563472008599241
Chr1	4405844	4407721	mRNA	+	VDAG_JR2_Chr1g13750.1	0.0	43.0	0	0.5789473684210527	0.033000260102925345
Chr1	4408242	4409789	mRNA	-	VDAG_JR2_Chr1g13760.1	0.0	43.0	0	0.0	-0.3010299956639812
Chr1	4410544	4413372	mRNA	-	VDAG_JR2_Chr1g13770.1	0.0	43.0	0	0.0	-0.3010299956639812
Chr1	4416195	4416665	mRNA	+	VDAG_JR2_Chr1g13780.1	0.0	43.0	0	3.8	0.6334684555795865
Chr1	4463852	4465044	mRNA	+	VDAG_JR2_Chr1g13790.1	0.0	43.0	0	0.0	-0.3010299956639812
Chr1	4467193	4470822	mRNA	+	VDAG_JR2_Chr1g13800.1	0.0	43.0	0	0.25	-0.12493873660829995
Chr1	4476942	4480485	mRNA	-	VDAG_JR2_Chr1g13810.1	0.0	43.0	0	0.16666666666666666	-0.17609125905568127
Chr1	4483105	4484058	mRNA	-	VDAG_JR2_Chr1g13820.1	0.0	43.0	0	0.9	0.146128035678238
Chr1	4484724	4485587	mRNA	+	VDAG_JR2_Chr1g13830.1	0.0	43.0	0	0.1111111111111111	-0.21387981994508098
Chr1	4485438	4488494	mRNA	-	VDAG_JR2_Chr1g13840.1	0.0	43.0	0	0.03225806451612903	-0.27387774962036643
Chr1	4490343	4493341	mRNA	+	VDAG_JR2_Chr1g13850.1	0.0	43.0	0	3.533333333333333	0.6056641155967877
Chr1	4493424	4497798	mRNA	-	VDAG_JR2_Chr1g13860.1	0.0	43.0	0	0.022727272727272728	-0.2817248404685946
Chr1	4501620	4503208	mRNA	-	VDAG_JR2_Chr1g13870.1	0.0	43.0	0	0.0	-0.3010299956639812
Chr1	4503304	4506555	mRNA	+	VDAG_JR2_Chr1g13880.1	0.0	43.0	0	2.696969696969697	0.504738519755824
Chr1	4506519	4507605	mRNA	-	VDAG_JR2_Chr1g13890.1	0.0	43.0	0	0.18181818181818182	-0.16633142176652496
Chr1	4508371	4510414	mRNA	+	VDAG_JR2_Chr1g13900.1	1.0	41.0	0	0.1	-0.2218487496163564
Chr1	4510761	4513817	mRNA	+	VDAG_JR2_Chr1g13910.1	0.0	43.0	0	4.6	0.7075701760979364
Chr1	4513995	4517395	mRNA	-	VDAG_JR2_Chr1g13920.1	2.0	40.0	0	0.38235294117647056	-0.0543576623225927
Chr1	4518573	4521623	mRNA	-	VDAG_JR2_Chr1g13930.1	0.0	43.0	0	0.0	-0.3010299956639812
Chr1	4522503	4524110	mRNA	+	VDAG_JR2_Chr1g13940.1	0.0	43.0	0	0.0	-0.3010299956639812
Chr1	4525674	4527185	mRNA	+	VDAG_JR2_Chr1g13950.1	0.0	43.0	0	0.0	-0.3010299956639812
Chr1	4527448	4528840	mRNA	-	VDAG_JR2_Chr1g13960.1	0.0	43.0	0	1.2857142857142858	0.2518119729937996
Chr1	4529096	4531047	mRNA	+	VDAG_JR2_Chr1g13970.1	0.0	43.0	0	1.368421052631579	0.2714747521022651
Chr1	4531141	4531816	mRNA	+	VDAG_JR2_Chr1g13980.1	0.0	43.0	0	0.14285714285714285	-0.1918855262389132
Chr1	4531684	4533029	mRNA	-	VDAG_JR2_Chr1g13990.1	0.0	43.0	0	0.07692307692307693	-0.23888208891513676
Chr1	4533622	4535009	mRNA	-	VDAG_JR2_Chr1g14000.1	0.0	43.0	0	0.21428571428571427	-0.146128035678238
Chr1	4536110	4537362	mRNA	+	VDAG_JR2_Chr1g14010.1	0.0	43.0	0	0.5384615384615384	0.01639041618816929
Chr1	4537342	4539474	mRNA	-	VDAG_JR2_Chr1g14020.1	0.0	43.0	0	0.0	-0.3010299956639812
Chr1	4539723	4542867	mRNA	+	VDAG_JR2_Chr1g14030.1	0.0	43.0	0	0.0	-0.3010299956639812
Chr1	4542676	4544222	mRNA	-	VDAG_JR2_Chr1g14040.1	0.0	43.0	0	0.0	-0.3010299956639812
Chr1	4544368	4546330	mRNA	+	VDAG_JR2_Chr1g14050.1	0.0	43.0	0	0.15789473684210525	-0.1818435879447725
Chr1	4546411	4548794	mRNA	+	VDAG_JR2_Chr1g14060.1	0.0	43.0	0	0.125	-0.2041199826559248
Chr1	4549341	4551705	mRNA	+	VDAG_JR2_Chr1g14070.1	0.0	43.0	0	0.0	-0.3010299956639812
Chr1	4551927	4553135	mRNA	-	VDAG_JR2_Chr1g14080.1	0.0	43.0	0	2.8333333333333335	0.5228787452803376
Chr1	4553474	4554997	mRNA	-	VDAG_JR2_Chr1g14090.1	0.0	43.0	0	0.0	-0.3010299956639812
Chr1	4555472	4558531	mRNA	+	VDAG_JR2_Chr1g14100.1	0.0	43.0	0	0.03333333333333333	-0.27300127206373764
Chr1	4559212	4562497	mRNA	-	VDAG_JR2_Chr1g14110.1	0.0	43.0	0	0.0	-0.3010299956639812
Chr1	4565074	4565546	mRNA	-	VDAG_JR2_Chr1g14120.1	0.0	43.0	0	0.0	-0.3010299956639812
Chr1	4565752	4567498	mRNA	+	VDAG_JR2_Chr1g14130.1	0.0	43.0	0	2.0	0.3979400086720376
Chr1	4567855	4570131	mRNA	-	VDAG_JR2_Chr1g14140.1	0.0	43.0	0	0.3181818181818182	-0.0871501757189002
Chr1	4570463	4572256	mRNA	-	VDAG_JR2_Chr1g14150.1	0.0	43.0	0	2.1666666666666665	0.4259687322722811
Chr1	4572033	4576830	mRNA	-	VDAG_JR2_Chr1g14160.1	0.0	43.0	0	0.020833333333333332	-0.28330122870354957
Chr1	4577224	4579491	mRNA	+	VDAG_JR2_Chr1g14170.1	0.0	43.0	0	5.130434782608695	0.7505419323996777
Chr1	4579636	4581677	mRNA	-	VDAG_JR2_Chr1g14180.1	3.0	39.0	0	0.38095238095238093	-0.055047566330905476
Chr1	4582033	4584333	mRNA	-	VDAG_JR2_Chr1g14190.1	0.0	43.0	0	0.0	-0.3010299956639812
Chr1	4585076	4586502	mRNA	+	VDAG_JR2_Chr1g14200.1	0.0	43.0	0	0.0	-0.3010299956639812
Chr1	4589503	4592821	mRNA	+	VDAG_JR2_Chr1g14210.1	0.0	43.0	0	0.21212121212121213	-0.1474460776061512
Chr1	4595120	4598277	mRNA	+	VDAG_JR2_Chr1g14220.1	0.0	43.0	0	0.0	-0.3010299956639812
Chr1	4598330	4599935	mRNA	-	VDAG_JR2_Chr1g14230.1	0.0	43.0	0	5.75	0.7958800173440752
Chr1	4600120	4602966	mRNA	+	VDAG_JR2_Chr1g14240.1	1.0	41.0	0	0.034482758620689655	-0.27206629972866464
Chr1	4603100	4604799	mRNA	+	VDAG_JR2_Chr1g14250.1	0.0	43.0	0	0.5294117647058824	0.012589127308020467
Chr1	4604829	4612064	mRNA	-	VDAG_JR2_Chr1g14260.1	0.0	43.0	0	0.0	-0.3010299956639812
Chr1	4613876	4615391	mRNA	+	VDAG_JR2_Chr1g14270.1	0.0	43.0	0	0.0	-0.3010299956639812
Chr1	4615495	4616796	mRNA	-	VDAG_JR2_Chr1g14280.1	0.0	43.0	0	0.0	-0.3010299956639812
Chr1	4617036	4619297	mRNA	+	VDAG_JR2_Chr1g14290.1	0.0	43.0	0	0.2608695652173913	-0.11868978733129841
Chr1	4620598	4624118	mRNA	+	VDAG_JR2_Chr1g14300.1	0.0	43.0	0	0.0	-0.3010299956639812
Chr1	4624082	4627218	mRNA	+	VDAG_JR2_Chr1g14310.1	0.0	43.0	0	0.12903225806451613	-0.20132708247175468
Chr1	4627299	4629797	mRNA	+	VDAG_JR2_Chr1g14320.1	0.0	43.0	0	0.64	0.05690485133647264
Chr1	4629377	4631462	mRNA	-	VDAG_JR2_Chr1g14330.1	2.0	40.0	0	0.5714285714285714	0.029963223377443202
Chr1	4631554	4633003	mRNA	+	VDAG_JR2_Chr1g14340.1	0.0	43.0	0	0.0	-0.3010299956639812
Chr1	4632866	4635257	mRNA	+	VDAG_JR2_Chr1g14350.1	0.0	43.0	0	0.0	-0.3010299956639812
Chr1	4635314	4637538	mRNA	+	VDAG_JR2_Chr1g14360.1	0.0	43.0	0	0.0	-0.3010299956639812
Chr1	4638328	4639750	mRNA	+	VDAG_JR2_Chr1g14370.1	0.0	43.0	0	0.0	-0.3010299956639812
Chr1	4639857	4641794	mRNA	+	VDAG_JR2_Chr1g14380.1	0.0	43.0	0	2.3684210526315788	0.45764290132381347
Chr1	4642145	4644398	mRNA	-	VDAG_JR2_Chr1g14390.1	0.0	43.0	0	0.2608695652173913	-0.11868978733129841
Chr1	4644637	4645869	mRNA	+	VDAG_JR2_Chr1g14400.1	0.0	43.0	0	0.0	-0.3010299956639812
Chr1	4646561	4648576	mRNA	+	VDAG_JR2_Chr1g14410.1	0.0	43.0	0	0.0	-0.3010299956639812
Chr1	4648557	4651197	mRNA	+	VDAG_JR2_Chr1g14420.1	0.0	43.0	0	0.0	-0.3010299956639812
Chr1	4653090	4658106	mRNA	+	VDAG_JR2_Chr1g14430.1	0.0	43.0	0	0.0	-0.3010299956639812
Chr1	4658625	4660536	mRNA	-	VDAG_JR2_Chr1g14440.1	0.0	43.0	0	0.5263157894736842	0.01128101040968899
Chr1	4658661	4663399	mRNA	+	VDAG_JR2_Chr1g14450.1	0.0	43.0	0	1.0638297872340425	0.19418948114847742
Chr1	4663413	4665587	mRNA	-	VDAG_JR2_Chr1g14460.1	0.0	43.0	0	0.5454545454545454	0.019305155195386624
Chr1	4667030	4669428	mRNA	-	VDAG_JR2_Chr1g14470.1	0.0	43.0	0	1.7916666666666667	0.36015144778263786
Chr1	4670110	4674072	mRNA	-	VDAG_JR2_Chr1g14480.1	0.0	43.0	0	0.05	-0.2596373105057561
Chr1	4676584	4680894	mRNA	-	VDAG_JR2_Chr1g14490.1	0.0	43.0	0	0.16279069767441862	-0.17862359557107627
Chr1	4681303	4682886	mRNA	+	VDAG_JR2_Chr1g14500.1	0.0	43.0	0	0.0	-0.3010299956639812
Chr1	4682753	4683896	mRNA	+	VDAG_JR2_Chr1g14510.1	0.0	43.0	0	0.0	-0.3010299956639812
Chr1	4684531	4689369	mRNA	-	VDAG_JR2_Chr1g14520.1	0.0	43.0	0	0.0	-0.3010299956639812
Chr1	4693539	4696526	mRNA	-	VDAG_JR2_Chr1g14530.1	0.0	43.0	0	0.0	-0.3010299956639812
Chr1	4699674	4700691	mRNA	+	VDAG_JR2_Chr1g14540.1	0.0	43.0	0	0.0	-0.3010299956639812
Chr1	4700667	4703153	mRNA	-	VDAG_JR2_Chr1g14550.1	0.0	43.0	0	0.0	-0.3010299956639812
Chr1	4703326	4704980	mRNA	+	VDAG_JR2_Chr1g14560.1	0.0	43.0	0	0.35294117647058826	-0.069080919143299
Chr1	4705012	4709088	mRNA	-	VDAG_JR2_Chr1g14570.1	0.0	43.0	0	0.0	-0.3010299956639812
Chr1	4711150	4712860	mRNA	-	VDAG_JR2_Chr1g14580.1	0.0	43.0	0	0.0	-0.3010299956639812
Chr1	4712999	4713752	mRNA	+	VDAG_JR2_Chr1g14590.1	0.0	43.0	0	0.0	-0.3010299956639812
Chr1	4713863	4714571	mRNA	+	VDAG_JR2_Chr1g14600.1	0.0	43.0	0	0.0	-0.3010299956639812
Chr1	4715517	4716825	mRNA	+	VDAG_JR2_Chr1g14610.1	0.0	43.0	0	0.38461538461538464	-0.053245511953225105
Chr1	4717147	4720544	mRNA	-	VDAG_JR2_Chr1g14620.1	0.0	43.0	0	0.0	-0.3010299956639812
Chr1	4724242	4726312	mRNA	+	VDAG_JR2_Chr1g14630.1	0.0	43.0	0	0.0	-0.3010299956639812
Chr1	4725945	4727134	mRNA	-	VDAG_JR2_Chr1g14640.1	0.0	43.0	0	0.3333333333333333	-0.07918124604762487
Chr1	4726851	4728392	mRNA	-	VDAG_JR2_Chr1g14650.1	0.0	43.0	0	0.0	-0.3010299956639812
Chr1	4728703	4730158	mRNA	+	VDAG_JR2_Chr1g14660.1	0.0	43.0	0	0.0	-0.3010299956639812
Chr1	4732515	4734839	mRNA	+	VDAG_JR2_Chr1g14670.1	0.0	43.0	0	2.5652173913043477	0.4864612809738058
Chr1	4735342	4738449	mRNA	-	VDAG_JR2_Chr1g14680.1	0.0	43.0	0	0.03225806451612903	-0.27387774962036643
Chr1	4739504	4742094	mRNA	-	VDAG_JR2_Chr1g14690.1	6.0	36.0	0	0.9615384615384616	0.16481024864599222
Chr1	4742271	4744715	mRNA	-	VDAG_JR2_Chr1g14700.1	0.0	43.0	0	0.0	-0.3010299956639812
Chr1	4745582	4745967	mRNA	-	VDAG_JR2_Chr1g14710.1	0.0	43.0	0	0.0	-0.3010299956639812
Chr1	4746536	4752923	mRNA	-	VDAG_JR2_Chr1g14720.1	0.0	43.0	0	0.15625	-0.18293068358598671
Chr1	4753102	4755555	mRNA	-	VDAG_JR2_Chr1g14730.1	0.0	43.0	0	0.0	-0.3010299956639812
Chr1	4758252	4759778	mRNA	-	VDAG_JR2_Chr1g14740.1	0.0	43.0	0	0.0	-0.3010299956639812
Chr1	4760043	4761208	mRNA	-	VDAG_JR2_Chr1g14750.1	0.0	43.0	0	0.0	-0.3010299956639812
Chr1	4761863	4765462	mRNA	-	VDAG_JR2_Chr1g14760.1	0.0	43.0	0	1.1111111111111112	0.20712549279565004
Chr1	4767647	4769948	mRNA	+	VDAG_JR2_Chr1g14770.1	0.0	43.0	0	0.0	-0.3010299956639812
Chr1	4770013	4771039	mRNA	-	VDAG_JR2_Chr1g14780.1	0.0	43.0	0	1.0	0.17609125905568124
Chr1	4772505	4774584	mRNA	+	VDAG_JR2_Chr1g14790.1	0.0	43.0	0	0.0	-0.3010299956639812
Chr1	4776983	4782178	mRNA	+	VDAG_JR2_Chr1g14800.1	0.0	43.0	0	0.0	-0.3010299956639812
Chr1	4782068	4784522	mRNA	-	VDAG_JR2_Chr1g14810.1	0.0	43.0	0	0.3333333333333333	-0.07918124604762487
Chr1	4784338	4785392	mRNA	-	VDAG_JR2_Chr1g14820.1	0.0	43.0	0	0.0	-0.3010299956639812
Chr1	4785890	4788616	mRNA	+	VDAG_JR2_Chr1g14830.1	0.0	43.0	0	0.07407407407407407	-0.24103206598869584
Chr1	4788668	4791280	mRNA	+	VDAG_JR2_Chr1g14840.1	0.0	43.0	0	0.0	-0.3010299956639812
Chr1	4791664	4792881	mRNA	+	VDAG_JR2_Chr1g14850.1	0.0	43.0	0	0.0	-0.3010299956639812
Chr1	4793243	4795553	mRNA	-	VDAG_JR2_Chr1g14860.1	0.0	43.0	0	0.0	-0.3010299956639812
Chr1	4796927	4798379	mRNA	-	VDAG_JR2_Chr1g14870.1	1.0	41.0	0	0.4666666666666667	-0.014723256820706347
Chr1	4798694	4799913	mRNA	+	VDAG_JR2_Chr1g14880.1	0.0	43.0	0	0.4166666666666667	-0.037788560889399754
Chr1	4799955	4801449	mRNA	-	VDAG_JR2_Chr1g14890.1	0.0	43.0	0	1.2857142857142858	0.2518119729937996
Chr1	4801895	4804233	mRNA	-	VDAG_JR2_Chr1g14900.1	0.0	43.0	0	0.17391304347826086	-0.1713961378473014
Chr1	4804895	4807032	mRNA	+	VDAG_JR2_Chr1g14910.1	0.0	43.0	0	5.142857142857143	0.7514990556122034
Chr1	4807217	4810673	mRNA	-	VDAG_JR2_Chr1g14920.1	0.0	43.0	0	0.0	-0.3010299956639812
Chr1	4812613	4814461	mRNA	-	VDAG_JR2_Chr1g14930.1	0.0	43.0	0	0.0	-0.3010299956639812
Chr1	4815363	4816149	mRNA	-	VDAG_JR2_Chr1g14940.1	0.0	43.0	0	0.0	-0.3010299956639812
Chr1	4816147	4817262	mRNA	+	VDAG_JR2_Chr1g14950.1	0.0	43.0	0	0.0	-0.3010299956639812
Chr1	4817376	4818635	mRNA	+	VDAG_JR2_Chr1g14960.1	0.0	43.0	0	0.0	-0.3010299956639812
Chr1	4818814	4820015	mRNA	+	VDAG_JR2_Chr1g14970.1	0.0	43.0	0	0.0	-0.3010299956639812
Chr1	4819959	4821600	mRNA	-	VDAG_JR2_Chr1g14980.1	0.0	43.0	0	0.0	-0.3010299956639812
Chr1	4821922	4823499	mRNA	+	VDAG_JR2_Chr1g14990.1	0.0	43.0	0	0.0	-0.3010299956639812
Chr1	4824737	4826736	mRNA	+	VDAG_JR2_Chr1g15000.1	0.0	43.0	0	0.0	-0.3010299956639812
Chr1	4826609	4827785	mRNA	-	VDAG_JR2_Chr1g15010.1	0.0	43.0	0	0.0	-0.3010299956639812
Chr1	4829215	4829810	mRNA	+	VDAG_JR2_Chr1g15020.1	0.0	43.0	0	0.0	-0.3010299956639812
Chr1	4829990	4831008	mRNA	-	VDAG_JR2_Chr1g15030.1	0.0	43.0	0	0.0	-0.3010299956639812
Chr1	4832367	4834970	mRNA	+	VDAG_JR2_Chr1g15040.1	0.0	43.0	0	0.038461538461538464	-0.26884531229257996
Chr1	4834639	4836684	mRNA	-	VDAG_JR2_Chr1g15050.1	0.0	43.0	0	1.1428571428571428	0.21559980033935483
Chr1	4837176	4839464	mRNA	-	VDAG_JR2_Chr1g15060.1	0.0	43.0	0	2.0869565217391304	0.41278912971095666
Chr1	4840121	4841795	mRNA	-	VDAG_JR2_Chr1g15070.1	19.0	23.0	0	1.2352941176470589	0.2393730945998891
Chr1	4841842	4843494	mRNA	+	VDAG_JR2_Chr1g15080.1	0.0	43.0	0	0.0	-0.3010299956639812
Chr1	4843872	4846436	mRNA	+	VDAG_JR2_Chr1g15090.1	0.0	43.0	0	0.04	-0.26760624017703144
Chr1	4847827	4848702	mRNA	+	VDAG_JR2_Chr1g15100.1	0.0	43.0	0	11.333333333333334	1.0731070983354316
Chr1	4848368	4854725	mRNA	-	VDAG_JR2_Chr1g15110.1	9.0	33.0	0	0.3492063492063492	-0.07098676743235327
Chr1	4858359	4859049	mRNA	+	VDAG_JR2_Chr1g15120.1	0.0	43.0	0	0.0	-0.3010299956639812
Chr1	4859272	4859800	mRNA	+	VDAG_JR2_Chr1g15130.1	0.0	43.0	0	0.0	-0.3010299956639812
Chr1	4862517	4864471	mRNA	-	VDAG_JR2_Chr1g15140.1	0.0	43.0	0	0.0	-0.3010299956639812
Chr1	4864687	4867564	mRNA	-	VDAG_JR2_Chr1g15150.1	0.0	43.0	0	0.0	-0.3010299956639812
Chr1	4867770	4869214	mRNA	+	VDAG_JR2_Chr1g15160.1	0.0	43.0	0	0.0	-0.3010299956639812
Chr1	4869538	4871372	mRNA	+	VDAG_JR2_Chr1g15170.1	0.0	43.0	0	0.5263157894736842	0.01128101040968899
Chr1	4871236	4872086	mRNA	-	VDAG_JR2_Chr1g15180.1	0.0	43.0	0	0.8888888888888888	0.14266750356873154
Chr1	4873355	4876521	mRNA	-	VDAG_JR2_Chr1g15190.1	0.0	43.0	0	0.0	-0.3010299956639812
Chr1	4877269	4878395	mRNA	-	VDAG_JR2_Chr1g15200.1	0.0	43.0	0	0.0	-0.3010299956639812
Chr1	4888046	4888835	mRNA	+	VDAG_JR2_Chr1g15210.1	0.0	43.0	0	0.5	0.0
Chr1	4888672	4889108	mRNA	-	VDAG_JR2_Chr1g15220.1	0.0	43.0	0	0.0	-0.3010299956639812
Chr1	4889387	4892387	mRNA	-	VDAG_JR2_Chr1g15230.1	0.0	43.0	0	2.966666666666667	0.5399120845791179
Chr1	4894023	4896963	mRNA	+	VDAG_JR2_Chr1g15240.1	1.0	41.0	0	0.13333333333333333	-0.1983676537668335
Chr1	4897597	4903836	mRNA	+	VDAG_JR2_Chr1g15250.1	0.0	43.0	0	0.24193548387096775	-0.1296338578166798
Chr1	4913319	4915414	mRNA	+	VDAG_JR2_Chr1g15260.1	1.0	41.0	0	0.19047619047619047	-0.1608512924989444
Chr1	4915286	4916077	mRNA	-	VDAG_JR2_Chr1g15270.1	0.0	43.0	0	0.0	-0.3010299956639812
Chr1	4917188	4920520	mRNA	-	VDAG_JR2_Chr1g15280.1	26.0	16.0	0	2.1818181818181817	0.42842933081993795
Chr1	4922795	4926768	mRNA	-	VDAG_JR2_Chr1g15290.1	0.0	43.0	0	0.1	-0.2218487496163564
Chr1	4926965	4928903	mRNA	-	VDAG_JR2_Chr1g15300.1	0.0	43.0	0	0.10526315789473684	-0.21805576059921727
Chr1	4929209	4930114	mRNA	+	VDAG_JR2_Chr1g15310.1	0.0	43.0	0	0.3333333333333333	-0.07918124604762487
Chr1	4930412	4930660	mRNA	+	VDAG_JR2_Chr1g15320.1	0.0	43.0	0	0.0	-0.3010299956639812
Chr1	4930950	4935698	mRNA	+	VDAG_JR2_Chr1g15330.1	0.0	43.0	0	0.8958333333333334	0.14483356532523925
Chr1	4935732	4937338	mRNA	-	VDAG_JR2_Chr1g15340.1	0.0	43.0	0	6.25	0.829303772831025
Chr1	4938065	4938843	mRNA	+	VDAG_JR2_Chr1g15350.1	0.0	43.0	0	0.0	-0.3010299956639812
Chr1	4938757	4940439	mRNA	-	VDAG_JR2_Chr1g15360.1	0.0	43.0	0	2.0	0.3979400086720376
Chr1	4940583	4944907	mRNA	+	VDAG_JR2_Chr1g15370.1	0.0	43.0	0	0.0	-0.3010299956639812
Chr1	4946124	4948095	mRNA	-	VDAG_JR2_Chr1g15380.1	0.0	43.0	0	0.05	-0.2596373105057561
Chr1	4949273	4952941	mRNA	-	VDAG_JR2_Chr1g15390.1	0.0	43.0	0	0.0	-0.3010299956639812
Chr1	4953198	4955434	mRNA	+	VDAG_JR2_Chr1g15400.1	0.0	43.0	0	0.0	-0.3010299956639812
Chr1	4955552	4960077	mRNA	+	VDAG_JR2_Chr1g15410.1	0.0	43.0	0	0.26666666666666666	-0.1153934187020696
Chr1	4963521	4967099	mRNA	-	VDAG_JR2_Chr1g15420.1	0.0	43.0	0	0.0	-0.3010299956639812
Chr1	4969100	4970680	mRNA	+	VDAG_JR2_Chr1g15430.1	0.0	43.0	0	0.0	-0.3010299956639812
Chr1	4975051	4977415	mRNA	-	VDAG_JR2_Chr1g15440.1	0.0	43.0	0	0.0	-0.3010299956639812
Chr1	4977821	4983410	mRNA	+	VDAG_JR2_Chr1g15450.1	0.0	43.0	0	0.0	-0.3010299956639812
Chr1	4983508	4984512	mRNA	-	VDAG_JR2_Chr1g15460.1	0.0	43.0	0	0.2	-0.1549019599857432
Chr1	4984810	4986561	mRNA	-	VDAG_JR2_Chr1g15470.1	0.0	43.0	0	2.9444444444444446	0.5371191843949479
Chr1	4986939	4989044	mRNA	-	VDAG_JR2_Chr1g15480.1	0.0	43.0	0	0.0	-0.3010299956639812
Chr1	4991853	4995762	mRNA	-	VDAG_JR2_Chr1g15490.1	0.0	43.0	0	0.0	-0.3010299956639812
Chr1	4996248	4997171	mRNA	-	VDAG_JR2_Chr1g15500.1	0.0	43.0	0	0.0	-0.3010299956639812
Chr1	4997585	5000674	mRNA	+	VDAG_JR2_Chr1g15510.1	0.0	43.0	0	0.41935483870967744	-0.03651683382576244
Chr1	5001186	5004780	mRNA	+	VDAG_JR2_Chr1g15520.1	0.0	43.0	0	0.16666666666666666	-0.17609125905568127
Chr1	5005904	5007193	mRNA	+	VDAG_JR2_Chr1g15530.1	0.0	43.0	0	0.0	-0.3010299956639812
Chr1	5010562	5013200	mRNA	+	VDAG_JR2_Chr1g15540.1	0.0	43.0	0	0.9615384615384616	0.16481024864599222
Chr1	5013656	5014945	mRNA	+	VDAG_JR2_Chr1g15550.1	0.0	43.0	0	3.0	0.5440680443502757
Chr1	5014735	5015782	mRNA	+	VDAG_JR2_Chr1g15560.1	2.0	40.0	0	0.18181818181818182	-0.16633142176652496
Chr1	5016051	5019567	mRNA	-	VDAG_JR2_Chr1g15570.1	0.0	43.0	0	0.7428571428571429	0.0944212126043617
Chr1	5024991	5026687	mRNA	-	VDAG_JR2_Chr1g15580.1	0.0	43.0	0	0.0	-0.3010299956639812
Chr1	5026907	5029169	mRNA	+	VDAG_JR2_Chr1g15590.1	0.0	43.0	0	0.0	-0.3010299956639812
Chr1	5029927	5032207	mRNA	-	VDAG_JR2_Chr1g15600.1	0.0	43.0	0	0.13043478260869565	-0.20035983378261796
Chr1	5032274	5035708	mRNA	-	VDAG_JR2_Chr1g15610.1	0.0	43.0	0	0.0	-0.3010299956639812
Chr1	5035917	5037787	mRNA	+	VDAG_JR2_Chr1g15620.1	0.0	43.0	0	1.736842105263158	0.3496353290974826
Chr1	5037615	5048491	mRNA	-	VDAG_JR2_Chr1g15630.1	0.0	43.0	0	0.8348623853211009	0.1254364953813025
Chr1	5050749	5052224	mRNA	-	VDAG_JR2_Chr1g15640.1	0.0	43.0	0	0.0	-0.3010299956639812
Chr1	5052434	5053244	mRNA	+	VDAG_JR2_Chr1g15650.1	0.0	43.0	0	0.0	-0.3010299956639812
Chr1	5057795	5059044	mRNA	+	VDAG_JR2_Chr1g15660.1	0.0	43.0	0	0.0	-0.3010299956639812
Chr1	5059435	5063398	mRNA	+	VDAG_JR2_Chr1g15670.1	0.0	43.0	0	0.1	-0.2218487496163564
Chr1	5063583	5070049	mRNA	+	VDAG_JR2_Chr1g15680.1	0.0	43.0	0	0.0	-0.3010299956639812
Chr1	5069951	5071153	mRNA	-	VDAG_JR2_Chr1g15690.1	0.0	43.0	0	0.0	-0.3010299956639812
Chr1	5071757	5075400	mRNA	+	VDAG_JR2_Chr1g15700.1	0.0	43.0	0	0.0	-0.3010299956639812
Chr1	5075825	5080160	mRNA	+	VDAG_JR2_Chr1g15710.1	0.0	43.0	0	0.0	-0.3010299956639812
Chr1	5080384	5082463	mRNA	+	VDAG_JR2_Chr1g15720.1	0.0	43.0	0	0.0	-0.3010299956639812
Chr1	5082740	5084272	mRNA	-	VDAG_JR2_Chr1g15730.1	0.0	43.0	0	0.0	-0.3010299956639812
Chr1	5085829	5086676	mRNA	+	VDAG_JR2_Chr1g15740.1	0.0	43.0	0	0.0	-0.3010299956639812
Chr1	5086623	5087940	mRNA	-	VDAG_JR2_Chr1g15750.1	0.0	43.0	0	0.0	-0.3010299956639812
Chr1	5088143	5089136	mRNA	-	VDAG_JR2_Chr1g15760.1	0.0	43.0	0	0.0	-0.3010299956639812
Chr1	5089266	5090159	mRNA	+	VDAG_JR2_Chr1g15770.1	0.0	43.0	0	0.0	-0.3010299956639812
Chr1	5090124	5092871	mRNA	-	VDAG_JR2_Chr1g15780.1	0.0	43.0	0	0.0	-0.3010299956639812
Chr1	5093075	5095165	mRNA	-	VDAG_JR2_Chr1g15790.1	0.0	43.0	0	0.0	-0.3010299956639812
Chr1	5096510	5098593	mRNA	-	VDAG_JR2_Chr1g15800.1	0.0	43.0	0	0.0	-0.3010299956639812
Chr1	5098898	5099409	mRNA	+	VDAG_JR2_Chr1g15810.1	0.0	43.0	0	0.0	-0.3010299956639812
Chr1	5099361	5101503	mRNA	-	VDAG_JR2_Chr1g15820.1	0.0	43.0	0	0.0	-0.3010299956639812
Chr1	5101942	5103667	mRNA	+	VDAG_JR2_Chr1g15830.1	0.0	43.0	1	0.0	-0.3010299956639812
Chr1	5103933	5104928	mRNA	-	VDAG_JR2_Chr1g15840.1	0.0	43.0	1	0.0	-0.3010299956639812
Chr1	5108022	5109451	mRNA	+	VDAG_JR2_Chr1g15850.1	0.0	43.0	1	0.0	-0.3010299956639812
Chr1	5109401	5111957	mRNA	+	VDAG_JR2_Chr1g15860.1	0.0	43.0	1	0.0	-0.3010299956639812
Chr1	5113491	5115663	mRNA	-	VDAG_JR2_Chr1g15870.1	0.0	43.0	0	0.045454545454545456	-0.26324143477458145
Chr1	5115696	5124171	mRNA	+	VDAG_JR2_Chr1g15880.1	1.0	41.0	0	0.03529411764705882	-0.27140752905718035
Chr1	5124526	5125368	mRNA	-	VDAG_JR2_Chr1g15890.1	0.0	43.0	0	0.0	-0.3010299956639812
Chr1	5126541	5129273	mRNA	-	VDAG_JR2_Chr1g15900.1	0.0	43.0	0	0.2857142857142857	-0.104735350520013
Chr1	5129478	5130671	mRNA	-	VDAG_JR2_Chr1g15910.1	0.0	43.0	0	0.0	-0.3010299956639812
Chr1	5130732	5132471	mRNA	+	VDAG_JR2_Chr1g15920.1	0.0	43.0	0	0.0	-0.3010299956639812
Chr1	5136687	5141944	mRNA	+	VDAG_JR2_Chr1g15930.1	0.0	43.0	0	0.0	-0.3010299956639812
Chr1	5142711	5144025	mRNA	-	VDAG_JR2_Chr1g15940.1	0.0	43.0	0	0.0	-0.3010299956639812
Chr1	5144304	5146417	mRNA	+	VDAG_JR2_Chr1g15950.1	0.0	43.0	0	0.42857142857142855	-0.03218468337140124
Chr1	5146179	5153617	mRNA	-	VDAG_JR2_Chr1g15960.1	0.0	43.0	0	0.0	-0.3010299956639812
Chr1	5153928	5156735	mRNA	-	VDAG_JR2_Chr1g15970.1	0.0	43.0	0	0.0	-0.3010299956639812
Chr1	5157107	5159115	mRNA	+	VDAG_JR2_Chr1g15980.1	0.0	43.0	0	0.05	-0.2596373105057561
Chr1	5158946	5161845	mRNA	-	VDAG_JR2_Chr1g15990.1	0.0	43.0	0	0.0	-0.3010299956639812
Chr1	5162613	5165469	mRNA	+	VDAG_JR2_Chr1g16000.1	0.0	43.0	0	0.0	-0.3010299956639812
Chr1	5165753	5169503	mRNA	+	VDAG_JR2_Chr1g16010.1	0.0	43.0	0	0.0	-0.3010299956639812
Chr1	5169681	5170597	mRNA	+	VDAG_JR2_Chr1g16020.1	0.0	43.0	0	1.1111111111111112	0.20712549279565004
Chr1	5170535	5174644	mRNA	-	VDAG_JR2_Chr1g16030.1	0.0	43.0	0	0.0	-0.3010299956639812
Chr1	5175498	5177266	mRNA	+	VDAG_JR2_Chr1g16040.1	0.0	43.0	0	0.16666666666666666	-0.17609125905568127
Chr1	5177893	5179185	mRNA	-	VDAG_JR2_Chr1g16050.1	0.0	43.0	0	0.0	-0.3010299956639812
Chr1	5180306	5181490	mRNA	+	VDAG_JR2_Chr1g16060.1	0.0	43.0	0	0.0	-0.3010299956639812
Chr1	5182543	5184056	mRNA	-	VDAG_JR2_Chr1g16070.1	3.0	39.0	0	1.4375	0.2872417111783479
Chr1	5184886	5185922	mRNA	-	VDAG_JR2_Chr1g16080.1	0.0	43.0	0	0.0	-0.3010299956639812
Chr1	5185915	5187289	mRNA	-	VDAG_JR2_Chr1g16090.1	0.0	43.0	0	0.0	-0.3010299956639812
Chr1	5187602	5188718	mRNA	+	VDAG_JR2_Chr1g16100.1	0.0	43.0	0	0.45454545454545453	-0.02020338608828695
Chr1	5188607	5191779	mRNA	-	VDAG_JR2_Chr1g16110.1	1.0	41.0	0	0.0625	-0.2498774732165999
Chr1	5191924	5194159	mRNA	-	VDAG_JR2_Chr1g16120.1	0.0	43.0	0	0.0	-0.3010299956639812
Chr1	5194775	5197281	mRNA	+	VDAG_JR2_Chr1g16130.1	0.0	43.0	0	0.0	-0.3010299956639812
Chr1	5198315	5199614	mRNA	+	VDAG_JR2_Chr1g16140.1	0.0	43.0	0	0.0	-0.3010299956639812
Chr1	5199726	5201023	mRNA	-	VDAG_JR2_Chr1g16150.1	0.0	43.0	0	0.38461538461538464	-0.053245511953225105
Chr1	5201715	5202724	mRNA	-	VDAG_JR2_Chr1g16160.1	0.0	43.0	0	0.0	-0.3010299956639812
Chr1	5202792	5203936	mRNA	+	VDAG_JR2_Chr1g16170.1	0.0	43.0	0	0.0	-0.3010299956639812
Chr1	5204137	5207037	mRNA	-	VDAG_JR2_Chr1g16180.1	0.0	43.0	0	0.0	-0.3010299956639812
Chr1	5207181	5210135	mRNA	+	VDAG_JR2_Chr1g16190.1	0.0	43.0	0	0.0	-0.3010299956639812
Chr1	5209975	5212293	mRNA	-	VDAG_JR2_Chr1g16200.1	0.0	43.0	0	0.0	-0.3010299956639812
Chr1	5212608	5214381	mRNA	+	VDAG_JR2_Chr1g16210.1	0.0	43.0	0	0.0	-0.3010299956639812
Chr1	5214566	5217177	mRNA	-	VDAG_JR2_Chr1g16220.1	0.0	43.0	0	0.0	-0.3010299956639812
Chr1	5219502	5221075	mRNA	-	VDAG_JR2_Chr1g16230.1	0.0	43.0	0	0.0	-0.3010299956639812
Chr1	5221757	5223900	mRNA	+	VDAG_JR2_Chr1g16240.1	0.0	43.0	0	0.0	-0.3010299956639812
Chr1	5223931	5225282	mRNA	-	VDAG_JR2_Chr1g16250.1	0.0	43.0	0	0.0	-0.3010299956639812
Chr1	5226124	5228791	mRNA	+	VDAG_JR2_Chr1g16260.1	0.0	43.0	0	0.0	-0.3010299956639812
Chr1	5228720	5229134	mRNA	-	VDAG_JR2_Chr1g16270.1	0.0	43.0	0	0.0	-0.3010299956639812
Chr1	5229343	5230686	mRNA	+	VDAG_JR2_Chr1g16280.1	0.0	43.0	0	0.0	-0.3010299956639812
Chr1	5230869	5232131	mRNA	+	VDAG_JR2_Chr1g16290.1	0.0	43.0	0	0.0	-0.3010299956639812
Chr1	5232597	5234020	mRNA	+	VDAG_JR2_Chr1g16300.1	0.0	43.0	0	0.0	-0.3010299956639812
Chr1	5233989	5236320	mRNA	-	VDAG_JR2_Chr1g16310.1	0.0	43.0	0	0.0	-0.3010299956639812
Chr1	5236585	5237486	mRNA	+	VDAG_JR2_Chr1g16320.1	0.0	43.0	0	0.0	-0.3010299956639812
Chr1	5237473	5239049	mRNA	-	VDAG_JR2_Chr1g16330.1	0.0	43.0	0	0.0	-0.3010299956639812
Chr1	5238979	5240917	mRNA	+	VDAG_JR2_Chr1g16340.1	0.0	43.0	0	0.0	-0.3010299956639812
Chr1	5241171	5242720	mRNA	-	VDAG_JR2_Chr1g16350.1	0.0	43.0	0	0.0	-0.3010299956639812
Chr1	5243715	5245961	mRNA	+	VDAG_JR2_Chr1g16360.1	0.0	43.0	0	0.0	-0.3010299956639812
Chr1	5246156	5247550	mRNA	+	VDAG_JR2_Chr1g16370.1	0.0	43.0	0	0.0	-0.3010299956639812
Chr1	5247468	5248450	mRNA	-	VDAG_JR2_Chr1g16380.1	0.0	43.0	0	0.0	-0.3010299956639812
Chr1	5248605	5249915	mRNA	-	VDAG_JR2_Chr1g16390.1	0.0	43.0	0	0.0	-0.3010299956639812
Chr1	5250460	5252625	mRNA	+	VDAG_JR2_Chr1g16400.1	0.0	43.0	0	0.09523809523809523	-0.22530928172586287
Chr1	5253553	5259246	mRNA	+	VDAG_JR2_Chr1g16410.1	0.0	43.0	0	0.0	-0.3010299956639812
Chr1	5259502	5260777	mRNA	-	VDAG_JR2_Chr1g16420.1	0.0	43.0	0	0.0	-0.3010299956639812
Chr1	5263280	5266013	mRNA	+	VDAG_JR2_Chr1g16430.1	0.0	43.0	0	0.0	-0.3010299956639812
Chr1	5266074	5267693	mRNA	-	VDAG_JR2_Chr1g16440.1	0.0	43.0	0	0.0	-0.3010299956639812
Chr1	5267880	5268604	mRNA	+	VDAG_JR2_Chr1g16450.1	0.0	43.0	0	0.0	-0.3010299956639812
Chr1	5270275	5271604	mRNA	+	VDAG_JR2_Chr1g16460.1	0.0	43.0	0	0.0	-0.3010299956639812
Chr1	5271994	5275389	mRNA	+	VDAG_JR2_Chr1g16470.1	0.0	43.0	0	0.0	-0.3010299956639812
Chr1	5275323	5276882	mRNA	-	VDAG_JR2_Chr1g16480.1	0.0	43.0	0	0.0625	-0.2498774732165999
Chr1	5278512	5281071	mRNA	+	VDAG_JR2_Chr1g16490.1	0.0	43.0	0	0.038461538461538464	-0.26884531229257996
Chr1	5281307	5282676	mRNA	-	VDAG_JR2_Chr1g16500.1	0.0	43.0	0	2.9285714285714284	0.5351132016973492
Chr1	5282667	5283863	mRNA	-	VDAG_JR2_Chr1g16510.1	0.0	43.0	0	0.0	-0.3010299956639812
Chr1	5284587	5286801	mRNA	+	VDAG_JR2_Chr1g16520.1	0.0	43.0	0	2.1818181818181817	0.42842933081993795
Chr1	5286741	5288587	mRNA	-	VDAG_JR2_Chr1g16530.1	0.0	43.0	0	0.0	-0.3010299956639812
Chr1	5288623	5289960	mRNA	-	VDAG_JR2_Chr1g16540.1	0.0	43.0	0	0.0	-0.3010299956639812
Chr1	5290427	5293251	mRNA	+	VDAG_JR2_Chr1g16550.1	0.0	43.0	0	0.0	-0.3010299956639812
Chr1	5294202	5294944	mRNA	+	VDAG_JR2_Chr1g16560.1	3.0	39.0	0	0.42857142857142855	-0.03218468337140124
Chr1	5294940	5295620	mRNA	-	VDAG_JR2_Chr1g16570.1	0.0	43.0	0	0.0	-0.3010299956639812
Chr1	5296470	5297314	mRNA	-	VDAG_JR2_Chr1g16580.1	0.0	43.0	0	0.5	0.0
Chr1	5298387	5300429	mRNA	-	VDAG_JR2_Chr1g16590.1	0.0	43.0	0	0.0	-0.3010299956639812
Chr1	5302092	5303261	mRNA	-	VDAG_JR2_Chr1g16600.1	0.0	43.0	0	0.0	-0.3010299956639812
Chr1	5304145	5307550	mRNA	+	VDAG_JR2_Chr1g16610.1	0.0	43.0	0	0.0	-0.3010299956639812
Chr1	5307536	5308983	mRNA	-	VDAG_JR2_Chr1g16620.1	0.0	43.0	0	0.0	-0.3010299956639812
Chr1	5309533	5311281	mRNA	+	VDAG_JR2_Chr1g16630.1	0.0	43.0	0	0.0	-0.3010299956639812
Chr1	5311869	5313886	mRNA	+	VDAG_JR2_Chr1g16640.1	0.0	43.0	0	0.0	-0.3010299956639812
Chr1	5313804	5316277	mRNA	-	VDAG_JR2_Chr1g16650.1	0.0	43.0	0	0.0	-0.3010299956639812
Chr1	5317295	5318309	mRNA	+	VDAG_JR2_Chr1g16660.1	0.0	43.0	0	0.0	-0.3010299956639812
Chr1	5318524	5319568	mRNA	+	VDAG_JR2_Chr1g16670.1	0.0	43.0	0	0.0	-0.3010299956639812
Chr1	5319528	5321128	mRNA	-	VDAG_JR2_Chr1g16680.1	0.0	43.0	0	0.0	-0.3010299956639812
Chr1	5321353	5322636	mRNA	+	VDAG_JR2_Chr1g16690.1	0.0	43.0	0	0.0	-0.3010299956639812
Chr1	5323303	5324105	mRNA	-	VDAG_JR2_Chr1g16700.1	0.0	43.0	0	0.0	-0.3010299956639812
Chr1	5324702	5327913	mRNA	+	VDAG_JR2_Chr1g16710.1	0.0	43.0	0	0.0	-0.3010299956639812
Chr1	5328378	5329954	mRNA	+	VDAG_JR2_Chr1g16720.1	0.0	43.0	0	0.0	-0.3010299956639812
Chr1	5329948	5331122	mRNA	-	VDAG_JR2_Chr1g16730.1	0.0	43.0	0	8.5	0.9542425094393249
Chr1	5331478	5333599	mRNA	-	VDAG_JR2_Chr1g16740.1	0.0	43.0	0	0.0	-0.3010299956639812
Chr1	5334312	5335920	mRNA	-	VDAG_JR2_Chr1g16750.1	0.0	43.0	0	0.0	-0.3010299956639812
Chr1	5336086	5337865	mRNA	-	VDAG_JR2_Chr1g16760.1	0.0	43.0	0	0.0	-0.3010299956639812
Chr1	5339045	5343591	mRNA	-	VDAG_JR2_Chr1g16770.1	0.0	43.0	0	0.0	-0.3010299956639812
Chr1	5343761	5345747	mRNA	+	VDAG_JR2_Chr1g16780.1	0.0	43.0	0	0.0	-0.3010299956639812
Chr1	5346683	5348885	mRNA	+	VDAG_JR2_Chr1g16790.1	0.0	43.0	0	0.0	-0.3010299956639812
Chr1	5349027	5351747	mRNA	-	VDAG_JR2_Chr1g16800.1	0.0	43.0	0	0.0	-0.3010299956639812
Chr1	5351960	5353220	mRNA	+	VDAG_JR2_Chr1g16810.1	0.0	43.0	0	0.0	-0.3010299956639812
Chr1	5353841	5356945	mRNA	+	VDAG_JR2_Chr1g16820.1	0.0	43.0	0	0.0	-0.3010299956639812
Chr1	5358210	5358445	mRNA	+	VDAG_JR2_Chr1g16830.1	0.0	43.0	0	0.0	-0.3010299956639812
Chr1	5358941	5359925	mRNA	-	VDAG_JR2_Chr1g16840.1	0.0	43.0	0	0.0	-0.3010299956639812
Chr1	5363025	5366979	mRNA	+	VDAG_JR2_Chr1g16850.1	0.0	43.0	0	0.0	-0.3010299956639812
Chr1	5367071	5368918	mRNA	+	VDAG_JR2_Chr1g16860.1	0.0	43.0	0	0.0	-0.3010299956639812
Chr1	5369005	5372582	mRNA	+	VDAG_JR2_Chr1g16870.1	0.0	43.0	0	0.2222222222222222	-0.14132915279646932
Chr1	5372145	5375495	mRNA	-	VDAG_JR2_Chr1g16880.1	0.0	43.0	0	0.2647058823529412	-0.11650556907143719
Chr1	5375662	5378312	mRNA	+	VDAG_JR2_Chr1g16890.1	0.0	43.0	0	0.0	-0.3010299956639812
Chr1	5378080	5379190	mRNA	+	VDAG_JR2_Chr1g16900.1	0.0	43.0	0	0.0	-0.3010299956639812
Chr1	5379145	5381046	mRNA	+	VDAG_JR2_Chr1g16910.1	0.0	43.0	0	0.0	-0.3010299956639812
Chr1	5381118	5382467	mRNA	-	VDAG_JR2_Chr1g16920.1	0.0	43.0	0	0.0	-0.3010299956639812
Chr1	5386599	5391077	mRNA	-	VDAG_JR2_Chr1g16930.1	0.0	43.0	0	0.0	-0.3010299956639812
Chr1	5391875	5394104	mRNA	+	VDAG_JR2_Chr1g16940.1	0.0	43.0	0	0.0	-0.3010299956639812
Chr1	5395460	5402658	mRNA	+	VDAG_JR2_Chr1g16950.1	0.0	43.0	0	0.041666666666666664	-0.2662678894047693
Chr1	5403327	5404107	mRNA	+	VDAG_JR2_Chr1g16960.1	0.0	43.0	0	0.75	0.09691001300805642
Chr1	5404140	5405752	mRNA	-	VDAG_JR2_Chr1g16970.1	0.0	43.0	0	0.0	-0.3010299956639812
Chr1	5406564	5411434	mRNA	+	VDAG_JR2_Chr1g16980.1	0.0	43.0	0	0.2916666666666667	-0.10145764075877702
Chr1	5412714	5412979	mRNA	-	VDAG_JR2_Chr1g16990.1	0.0	43.0	0	0.0	-0.3010299956639812
Chr1	5414709	5416200	mRNA	-	VDAG_JR2_Chr1g17000.1	0.0	43.0	0	1.1333333333333333	0.21307482530885122
Chr1	5416654	5417609	mRNA	+	VDAG_JR2_Chr1g17010.1	0.0	43.0	0	0.0	-0.3010299956639812
Chr1	5417775	5419930	mRNA	+	VDAG_JR2_Chr1g17020.1	0.0	43.0	0	0.14285714285714285	-0.1918855262389132
Chr1	5419799	5423770	mRNA	-	VDAG_JR2_Chr1g17030.1	0.0	43.0	0	0.0	-0.3010299956639812
Chr1	5424201	5428195	mRNA	-	VDAG_JR2_Chr1g17040.1	0.0	43.0	0	0.15	-0.18708664335714442
Chr1	5429255	5431111	mRNA	+	VDAG_JR2_Chr1g17050.1	0.0	43.0	0	0.0	-0.3010299956639812
Chr1	5431407	5436399	mRNA	-	VDAG_JR2_Chr1g17060.1	0.0	43.0	0	0.04	-0.26760624017703144
Chr1	5437500	5438707	mRNA	+	VDAG_JR2_Chr1g17070.1	0.0	43.0	0	0.0	-0.3010299956639812
Chr1	5442854	5446360	mRNA	+	VDAG_JR2_Chr1g17080.1	0.0	43.0	0	0.0	-0.3010299956639812
Chr1	5446665	5450596	mRNA	+	VDAG_JR2_Chr1g17090.1	0.0	43.0	0	0.1282051282051282	-0.20189852266196676
Chr1	5450010	5451494	mRNA	-	VDAG_JR2_Chr1g17100.1	0.0	43.0	0	0.0	-0.3010299956639812
Chr1	5451970	5453642	mRNA	-	VDAG_JR2_Chr1g17110.1	0.0	43.0	0	5.6875	0.7915152119416251
Chr1	5454223	5456512	mRNA	-	VDAG_JR2_Chr1g17120.1	0.0	43.0	0	1.0869565217391304	0.2005650284388818
Chr1	5456603	5460337	mRNA	+	VDAG_JR2_Chr1g17130.1	2.0	40.0	0	0.2972972972972973	-0.09837970808883197
Chr1	5459838	5463196	mRNA	-	VDAG_JR2_Chr1g17140.1	0.0	43.0	0	1.4411764705882353	0.2880650184996135
Chr1	5463360	5466443	mRNA	+	VDAG_JR2_Chr1g17150.1	0.0	43.0	0	0.0	-0.3010299956639812
Chr1	5466217	5468452	mRNA	-	VDAG_JR2_Chr1g17160.1	0.0	43.0	0	0.8695652173913043	0.1365827177720076
Chr1	5468623	5469870	mRNA	+	VDAG_JR2_Chr1g17170.1	0.0	43.0	0	0.7692307692307693	0.10354059190706949
Chr1	5469783	5472667	mRNA	-	VDAG_JR2_Chr1g17180.1	0.0	43.0	0	0.0	-0.3010299956639812
Chr1	5474307	5474477	mRNA	-	VDAG_JR2_Chr1g17190.1	0.0	43.0	0	0.0	-0.3010299956639812
Chr1	5475480	5476938	mRNA	+	VDAG_JR2_Chr1g17200.1	0.0	43.0	0	0.0	-0.3010299956639812
Chr1	5477223	5480846	mRNA	+	VDAG_JR2_Chr1g17210.1	0.0	43.0	0	0.25	-0.12493873660829995
Chr1	5480713	5482038	mRNA	-	VDAG_JR2_Chr1g17220.1	8.0	34.0	0	10.384615384615385	1.0368130875534722
Chr1	5482865	5485854	mRNA	-	VDAG_JR2_Chr1g17230.1	0.0	43.0	0	0.0	-0.3010299956639812
Chr1	5486084	5488837	mRNA	+	VDAG_JR2_Chr1g17240.1	0.0	43.0	0	0.0	-0.3010299956639812
Chr1	5489152	5490423	mRNA	+	VDAG_JR2_Chr1g17250.1	0.0	43.0	0	1.4166666666666667	0.28254658996996806
Chr1	5492017	5494268	mRNA	+	VDAG_JR2_Chr1g17260.1	0.0	43.0	0	0.08695652173913043	-0.23139406752258682
Chr1	5494760	5499388	mRNA	+	VDAG_JR2_Chr1g17270.1	0.0	43.0	0	0.5217391304347826	0.009340026254143432
Chr1	5499732	5501497	mRNA	+	VDAG_JR2_Chr1g17280.1	0.0	43.0	0	5.722222222222222	0.7939455175668756
Chr1	5501533	5503790	mRNA	-	VDAG_JR2_Chr1g17290.1	0.0	43.0	0	0.0	-0.3010299956639812
Chr1	5504493	5505179	mRNA	+	VDAG_JR2_Chr1g17300.1	0.0	43.0	0	0.0	-0.3010299956639812
Chr1	5506348	5508885	mRNA	+	VDAG_JR2_Chr1g17310.1	0.0	43.0	0	0.0	-0.3010299956639812
Chr1	5510606	5513157	mRNA	+	VDAG_JR2_Chr1g17320.1	0.0	43.0	0	0.15384615384615385	-0.18452442659254403
Chr1	5513557	5515425	mRNA	+	VDAG_JR2_Chr1g17330.1	0.0	43.0	0	0.05555555555555555	-0.25527250510330607
Chr1	5515327	5516064	mRNA	-	VDAG_JR2_Chr1g17340.1	0.0	43.0	0	6.875	0.8677620246502006
Chr1	5516117	5518885	mRNA	-	VDAG_JR2_Chr1g17350.1	2.0	40.0	0	0.21428571428571427	-0.146128035678238
Chr1	5519991	5520542	mRNA	+	VDAG_JR2_Chr1g17360.1	0.0	43.0	0	0.0	-0.3010299956639812
Chr1	5521755	5522027	mRNA	-	VDAG_JR2_Chr1g17370.1	0.0	43.0	0	0.0	-0.3010299956639812
Chr1	5522168	5523643	mRNA	-	VDAG_JR2_Chr1g17380.1	0.0	43.0	0	0.0	-0.3010299956639812
Chr1	5524865	5526145	mRNA	+	VDAG_JR2_Chr1g17390.1	0.0	43.0	0	0.0	-0.3010299956639812
Chr1	5526718	5527122	mRNA	-	VDAG_JR2_Chr1g17400.1	0.0	43.0	0	0.0	-0.3010299956639812
Chr1	5527286	5528963	mRNA	+	VDAG_JR2_Chr1g17410.1	0.0	43.0	0	3.3529411764705883	0.5857923786135092
Chr1	5528944	5532959	mRNA	-	VDAG_JR2_Chr1g17420.1	0.0	43.0	0	4.658536585365853	0.7125265149913256
Chr1	5533854	5537445	mRNA	+	VDAG_JR2_Chr1g17430.1	0.0	43.0	0	0.14285714285714285	-0.1918855262389132
Chr1	5539060	5545156	mRNA	+	VDAG_JR2_Chr1g17440.1	0.0	43.0	0	0.04918032786885246	-0.2602850279739218
Chr1	5545670	5548477	mRNA	-	VDAG_JR2_Chr1g17450.1	0.0	43.0	0	0.0	-0.3010299956639812
Chr1	5548561	5551204	mRNA	-	VDAG_JR2_Chr1g17460.1	0.0	43.0	0	0.0	-0.3010299956639812
Chr1	5552098	5554946	mRNA	+	VDAG_JR2_Chr1g17470.1	0.0	43.0	0	0.0	-0.3010299956639812
Chr1	5554882	5558195	mRNA	-	VDAG_JR2_Chr1g17480.1	0.0	43.0	0	0.12121212121212122	-0.20676007882213318
Chr1	5558308	5559207	mRNA	+	VDAG_JR2_Chr1g17490.1	0.0	43.0	0	0.0	-0.3010299956639812
Chr1	5559290	5561669	mRNA	-	VDAG_JR2_Chr1g17500.1	0.0	43.0	0	0.0	-0.3010299956639812
Chr1	5563175	5564501	mRNA	+	VDAG_JR2_Chr1g17510.1	0.0	43.0	0	0.0	-0.3010299956639812
Chr1	5564927	5566731	mRNA	-	VDAG_JR2_Chr1g17520.1	0.0	43.0	0	0.0	-0.3010299956639812
Chr1	5567845	5571732	mRNA	+	VDAG_JR2_Chr1g17530.1	0.0	43.0	0	0.0	-0.3010299956639812
Chr1	5573523	5576323	mRNA	-	VDAG_JR2_Chr1g17540.1	0.0	43.0	0	0.03571428571428571	-0.27106677228653797
Chr1	5576496	5577988	mRNA	+	VDAG_JR2_Chr1g17550.1	0.0	43.0	0	0.4666666666666667	-0.014723256820706347
Chr1	5578895	5580063	mRNA	+	VDAG_JR2_Chr1g17560.1	0.0	43.0	0	0.0	-0.3010299956639812
Chr1	5580154	5583332	mRNA	+	VDAG_JR2_Chr1g17570.1	0.0	43.0	0	0.22580645161290322	-0.1391791757229102
Chr1	5583269	5586018	mRNA	-	VDAG_JR2_Chr1g17580.1	0.0	43.0	0	0.0	-0.3010299956639812
Chr1	5587814	5590189	mRNA	+	VDAG_JR2_Chr1g17590.1	0.0	43.0	0	0.4166666666666667	-0.037788560889399754
Chr1	5590605	5592163	mRNA	+	VDAG_JR2_Chr1g17600.1	0.0	43.0	0	0.0	-0.3010299956639812
Chr1	5607966	5609065	mRNA	+	VDAG_JR2_Chr1g17610.1	0.0	43.0	0	0.09090909090909091	-0.22847932851536945
Chr1	5609792	5611978	mRNA	+	VDAG_JR2_Chr1g17620.1	0.0	43.0	0	0.0	-0.3010299956639812
Chr1	5612327	5614928	mRNA	-	VDAG_JR2_Chr1g17630.1	0.0	43.0	0	0.38461538461538464	-0.053245511953225105
Chr1	5615316	5617253	mRNA	+	VDAG_JR2_Chr1g17640.1	0.0	43.0	0	0.0	-0.3010299956639812
Chr1	5618025	5621631	mRNA	+	VDAG_JR2_Chr1g17650.1	0.0	43.0	0	0.0	-0.3010299956639812
Chr1	5622395	5623243	mRNA	+	VDAG_JR2_Chr1g17660.1	0.0	43.0	0	0.0	-0.3010299956639812
Chr1	5623165	5624091	mRNA	+	VDAG_JR2_Chr1g17670.1	0.0	43.0	0	0.0	-0.3010299956639812
Chr1	5625239	5625949	mRNA	+	VDAG_JR2_Chr1g17680.1	0.0	43.0	0	0.0	-0.3010299956639812
Chr1	5625894	5627383	mRNA	-	VDAG_JR2_Chr1g17690.1	0.0	43.0	0	0.0	-0.3010299956639812
Chr1	5627640	5630883	mRNA	+	VDAG_JR2_Chr1g17700.1	0.0	43.0	0	0.12121212121212122	-0.20676007882213318
Chr1	5634165	5638326	mRNA	+	VDAG_JR2_Chr1g17710.1	0.0	43.0	0	0.0	-0.3010299956639812
Chr1	5638631	5639772	mRNA	-	VDAG_JR2_Chr1g17720.1	0.0	43.0	0	0.0	-0.3010299956639812
Chr1	5639890	5642224	mRNA	-	VDAG_JR2_Chr1g17730.1	0.0	43.0	0	0.0	-0.3010299956639812
Chr1	5642377	5644416	mRNA	+	VDAG_JR2_Chr1g17740.1	0.0	43.0	0	0.0	-0.3010299956639812
Chr1	5644512	5646506	mRNA	+	VDAG_JR2_Chr1g17750.1	0.0	43.0	0	0.75	0.09691001300805642
Chr1	5646264	5648735	mRNA	-	VDAG_JR2_Chr1g17760.1	0.0	43.0	0	0.0	-0.3010299956639812
Chr1	5648991	5650999	mRNA	+	VDAG_JR2_Chr1g17770.1	0.0	43.0	0	0.0	-0.3010299956639812
Chr1	5651340	5653526	mRNA	+	VDAG_JR2_Chr1g17780.1	0.0	43.0	0	0.0	-0.3010299956639812
Chr1	5653778	5654996	mRNA	+	VDAG_JR2_Chr1g17790.1	0.0	43.0	0	0.0	-0.3010299956639812
Chr1	5655191	5656578	mRNA	+	VDAG_JR2_Chr1g17800.1	0.0	43.0	0	0.0	-0.3010299956639812
Chr1	5656328	5657544	mRNA	-	VDAG_JR2_Chr1g17810.1	0.0	43.0	0	0.16666666666666666	-0.17609125905568127
Chr1	5657710	5660365	mRNA	-	VDAG_JR2_Chr1g17820.1	0.0	43.0	0	0.07407407407407407	-0.24103206598869584
Chr1	5661808	5663760	mRNA	-	VDAG_JR2_Chr1g17830.1	0.0	43.0	0	0.0	-0.3010299956639812
Chr1	5663962	5666994	mRNA	-	VDAG_JR2_Chr1g17840.1	0.0	43.0	0	0.0	-0.3010299956639812
Chr1	5667291	5668610	mRNA	+	VDAG_JR2_Chr1g17850.1	0.0	43.0	0	0.0	-0.3010299956639812
Chr1	5670770	5676542	mRNA	+	VDAG_JR2_Chr1g17860.1	1.0	41.0	0	0.17543859649122806	-0.17041412616399074
Chr1	5676127	5680943	mRNA	+	VDAG_JR2_Chr1g17870.1	0.0	43.0	0	1.4166666666666667	0.28254658996996806
Chr1	5681088	5683638	mRNA	+	VDAG_JR2_Chr1g17880.1	0.0	43.0	0	0.08	-0.23657200643706275
Chr1	5683178	5684554	mRNA	-	VDAG_JR2_Chr1g17890.1	1.0	41.0	0	5.428571428571429	0.7729500566978359
Chr1	5684973	5688547	mRNA	-	VDAG_JR2_Chr1g17900.1	0.0	43.0	0	0.14285714285714285	-0.1918855262389132
Chr1	5689515	5691729	mRNA	-	VDAG_JR2_Chr1g17910.1	0.0	43.0	0	0.0	-0.3010299956639812
Chr1	5693065	5697735	mRNA	-	VDAG_JR2_Chr1g17920.1	0.0	43.0	0	0.0	-0.3010299956639812
Chr1	5698374	5702053	mRNA	+	VDAG_JR2_Chr1g17930.1	0.0	43.0	0	0.0	-0.3010299956639812
Chr1	5702436	5706805	mRNA	-	VDAG_JR2_Chr1g17940.1	0.0	43.0	0	0.0	-0.3010299956639812
Chr1	5707495	5709639	mRNA	-	VDAG_JR2_Chr1g17950.1	0.0	43.0	0	0.0	-0.3010299956639812
Chr1	5710048	5711367	mRNA	-	VDAG_JR2_Chr1g17960.1	0.0	43.0	0	0.0	-0.3010299956639812
Chr1	5711791	5713580	mRNA	-	VDAG_JR2_Chr1g17970.1	0.0	43.0	0	0.0	-0.3010299956639812
Chr1	5713804	5714623	mRNA	-	VDAG_JR2_Chr1g17980.1	0.0	43.0	0	0.0	-0.3010299956639812
Chr1	5715152	5718874	mRNA	+	VDAG_JR2_Chr1g17990.1	0.0	43.0	0	0.0	-0.3010299956639812
Chr1	5719074	5719906	mRNA	-	VDAG_JR2_Chr1g18000.1	0.0	43.0	0	0.0	-0.3010299956639812
Chr1	5720110	5721503	mRNA	+	VDAG_JR2_Chr1g18010.1	0.0	43.0	0	0.0	-0.3010299956639812
Chr1	5721467	5723964	mRNA	-	VDAG_JR2_Chr1g18020.1	0.0	43.0	0	0.0	-0.3010299956639812
Chr1	5724455	5725540	mRNA	-	VDAG_JR2_Chr1g18030.1	0.0	43.0	0	0.0	-0.3010299956639812
Chr1	5725953	5727342	mRNA	-	VDAG_JR2_Chr1g18040.1	0.0	43.0	0	0.0	-0.3010299956639812
Chr1	5730833	5735569	mRNA	-	VDAG_JR2_Chr1g18050.1	0.0	43.0	0	0.0625	-0.2498774732165999
Chr1	5736412	5741501	mRNA	-	VDAG_JR2_Chr1g18060.1	0.0	43.0	0	0.0392156862745098	-0.26823748226767374
Chr1	5742058	5744745	mRNA	-	VDAG_JR2_Chr1g18070.1	0.0	43.0	0	0.0	-0.3010299956639812
Chr1	5746730	5748220	mRNA	+	VDAG_JR2_Chr1g18080.1	1.0	41.0	0	0.6	0.04139268515822508
Chr1	5748422	5750760	mRNA	+	VDAG_JR2_Chr1g18090.1	0.0	43.0	0	4.875	0.730378468587643
Chr1	5750755	5754538	mRNA	-	VDAG_JR2_Chr1g18100.1	0.0	43.0	0	0.16216216216216217	-0.17903563970246253
Chr1	5756052	5757074	mRNA	+	VDAG_JR2_Chr1g18110.1	8.0	34.0	0	6.0	0.8129133566428556
Chr1	5757107	5758795	mRNA	-	VDAG_JR2_Chr1g18120.1	0.0	43.0	0	0.0	-0.3010299956639812
Chr1	5759096	5764657	mRNA	-	VDAG_JR2_Chr1g18130.1	0.0	43.0	0	0.16071428571428573	-0.17998630293920542
Chr1	5764750	5765407	mRNA	+	VDAG_JR2_Chr1g18140.1	0.0	43.0	0	0.0	-0.3010299956639812
Chr1	5765439	5766795	mRNA	-	VDAG_JR2_Chr1g18150.1	0.0	43.0	0	0.0	-0.3010299956639812
Chr1	5768485	5771343	mRNA	+	VDAG_JR2_Chr1g18160.1	2.0	40.0	0	0.17857142857142858	-0.16840443038939024
Chr1	5771549	5773882	mRNA	-	VDAG_JR2_Chr1g18170.1	0.0	43.0	0	0.6666666666666666	0.06694678963061314
Chr1	5774411	5776402	mRNA	-	VDAG_JR2_Chr1g18180.1	0.0	43.0	0	0.0	-0.3010299956639812
Chr1	5776609	5779937	mRNA	-	VDAG_JR2_Chr1g18190.1	0.0	43.0	0	0.0	-0.3010299956639812
Chr1	5781690	5783633	mRNA	+	VDAG_JR2_Chr1g18200.1	0.0	43.0	0	0.0	-0.3010299956639812
Chr1	5783712	5785164	mRNA	-	VDAG_JR2_Chr1g18210.1	0.0	43.0	0	0.0	-0.3010299956639812
Chr1	5788954	5790601	mRNA	+	VDAG_JR2_Chr1g18220.1	0.0	43.0	0	0.0	-0.3010299956639812
Chr1	5791890	5794024	mRNA	+	VDAG_JR2_Chr1g18230.1	0.0	43.0	0	0.47619047619047616	-0.01046543367816498
Chr1	5794098	5796426	mRNA	-	VDAG_JR2_Chr1g18240.1	0.0	43.0	0	0.7391304347826086	0.09311702399091731
Chr1	5796507	5798215	mRNA	-	VDAG_JR2_Chr1g18250.1	2.0	40.0	0	0.29411764705882354	-0.10011515288326778
Chr1	5798306	5801569	mRNA	+	VDAG_JR2_Chr1g18260.1	0.0	43.0	0	1.5454545454545454	0.31078983295313745
Chr1	5801109	5802167	mRNA	-	VDAG_JR2_Chr1g18270.1	0.0	43.0	0	15.727272727272727	1.210245535289987
Chr1	5802485	5804091	mRNA	+	VDAG_JR2_Chr1g18280.1	1.0	41.0	0	3.875	0.640978057358332
Chr1	5804034	5806173	mRNA	-	VDAG_JR2_Chr1g18290.1	0.0	43.0	0	0.0	-0.3010299956639812
Chr1	5807026	5809122	mRNA	+	VDAG_JR2_Chr1g18300.1	0.0	43.0	0	0.0	-0.3010299956639812
Chr1	5809062	5810411	mRNA	-	VDAG_JR2_Chr1g18310.1	0.0	43.0	0	0.0	-0.3010299956639812
Chr1	5810354	5811362	mRNA	-	VDAG_JR2_Chr1g18320.1	0.0	43.0	0	0.0	-0.3010299956639812
Chr1	5811525	5812777	mRNA	-	VDAG_JR2_Chr1g18330.1	0.0	43.0	0	0.0	-0.3010299956639812
Chr1	5812773	5813524	mRNA	+	VDAG_JR2_Chr1g18340.1	0.0	43.0	0	0.0	-0.3010299956639812
Chr1	5814955	5815473	mRNA	-	VDAG_JR2_Chr1g18350.1	0.0	43.0	0	0.0	-0.3010299956639812
Chr1	5815954	5816784	mRNA	-	VDAG_JR2_Chr1g18360.1	0.0	43.0	0	0.0	-0.3010299956639812
Chr1	5817160	5820395	mRNA	+	VDAG_JR2_Chr1g18370.1	0.0	43.0	0	0.0	-0.3010299956639812
Chr1	5820558	5827089	mRNA	-	VDAG_JR2_Chr1g18380.1	0.0	43.0	0	0.0	-0.3010299956639812
Chr1	5829585	5836464	mRNA	+	VDAG_JR2_Chr1g18390.1	0.0	43.0	0	0.0	-0.3010299956639812
Chr1	5836404	5838582	mRNA	-	VDAG_JR2_Chr1g18400.1	0.0	43.0	0	0.7272727272727273	0.08894108333678108
Chr1	5838720	5842550	mRNA	-	VDAG_JR2_Chr1g18410.1	4.0	38.0	0	0.1282051282051282	-0.20189852266196676
Chr1	5843359	5844588	mRNA	-	VDAG_JR2_Chr1g18420.1	4.0	38.0	0	0.3333333333333333	-0.07918124604762487
Chr1	5850999	5855890	mRNA	+	VDAG_JR2_Chr1g18430.1	1.0	41.0	0	4.73469387755102	0.7188912894193215
Chr1	5857458	5859580	mRNA	-	VDAG_JR2_Chr1g18440.1	13.0	29.0	0	4.095238095238095	0.6623080186098733
Chr1	5859800	5863928	mRNA	+	VDAG_JR2_Chr1g18450.1	0.0	43.0	0	1.6829268292682926	0.33903917859617644
Chr1	5868122	5869905	mRNA	-	VDAG_JR2_Chr1g18460.1	0.0	43.0	0	0.3333333333333333	-0.07918124604762487
Chr1	5870373	5872255	mRNA	+	VDAG_JR2_Chr1g18470.1	0.0	43.0	0	0.0	-0.3010299956639812
Chr1	5876154	5881190	mRNA	+	VDAG_JR2_Chr1g18480.1	0.0	43.0	0	0.02	-0.28399665636520083
Chr1	5884074	5889147	mRNA	+	VDAG_JR2_Chr1g18490.1	0.0	43.0	0	0.0	-0.3010299956639812
Chr1	5889520	5893589	mRNA	+	VDAG_JR2_Chr1g18500.1	0.0	43.0	0	0.0	-0.3010299956639812
Chr1	5893717	5895674	mRNA	-	VDAG_JR2_Chr1g18510.1	0.0	43.0	0	0.45	-0.022276394711152253
Chr1	5896086	5899559	mRNA	-	VDAG_JR2_Chr1g18520.1	0.0	43.0	0	0.0	-0.3010299956639812
Chr1	5901755	5903351	mRNA	-	VDAG_JR2_Chr1g18530.1	0.0	43.0	0	0.0	-0.3010299956639812
Chr1	5903788	5905919	mRNA	+	VDAG_JR2_Chr1g18540.1	0.0	43.0	0	0.09523809523809523	-0.22530928172586287
Chr1	5905913	5907429	mRNA	-	VDAG_JR2_Chr1g18550.1	0.0	43.0	0	8.733333333333333	0.965358514344786
Chr1	5908185	5911491	mRNA	-	VDAG_JR2_Chr1g18560.1	0.0	43.0	0	1.9393939393939394	0.38728194048998105
Chr1	5912207	5912323	mRNA	-	VDAG_JR2_Chr1g18570.1	0.0	43.0	0	0.0	-0.3010299956639812
Chr1	5912745	5915590	mRNA	+	VDAG_JR2_Chr1g18580.1	0.0	43.0	0	0.0	-0.3010299956639812
Chr1	5916789	5919070	mRNA	-	VDAG_JR2_Chr1g18590.1	0.0	43.0	0	0.0	-0.3010299956639812
Chr1	5919198	5922794	mRNA	+	VDAG_JR2_Chr1g18600.1	0.0	43.0	0	0.0	-0.3010299956639812
Chr1	5922836	5924315	mRNA	-	VDAG_JR2_Chr1g18610.1	0.0	43.0	0	0.06666666666666667	-0.24667233334138852
Chr1	5925213	5928416	mRNA	-	VDAG_JR2_Chr1g18620.1	0.0	43.0	0	0.0	-0.3010299956639812
Chr1	5928856	5930214	mRNA	+	VDAG_JR2_Chr1g18630.1	0.0	43.0	0	10.076923076923077	1.0243593458594447
Chr1	5930555	5935880	mRNA	-	VDAG_JR2_Chr1g18640.1	0.0	43.0	0	0.0	-0.3010299956639812
Chr1	5937268	5937946	mRNA	+	VDAG_JR2_Chr1g18650.1	0.0	43.0	0	0.0	-0.3010299956639812
Chr1	5938974	5940802	mRNA	-	VDAG_JR2_Chr1g18660.1	0.0	43.0	0	0.2777777777777778	-0.10914446942506803
Chr1	5940980	5945666	mRNA	-	VDAG_JR2_Chr1g18670.1	0.0	43.0	0	0.0425531914893617	-0.26555767750176235
Chr1	5945994	5947260	mRNA	+	VDAG_JR2_Chr1g18680.1	1.0	41.0	0	1.6153846153846154	0.3253893415234259
Chr1	5947263	5949473	mRNA	-	VDAG_JR2_Chr1g18690.1	0.0	43.0	0	0.18181818181818182	-0.16633142176652496
Chr1	5949821	5951253	mRNA	-	VDAG_JR2_Chr1g18700.1	0.0	43.0	0	0.0	-0.3010299956639812
Chr1	5951930	5952938	mRNA	+	VDAG_JR2_Chr1g18710.1	0.0	43.0	0	0.0	-0.3010299956639812
Chr1	5953129	5955273	mRNA	-	VDAG_JR2_Chr1g18720.1	0.0	43.0	0	0.0	-0.3010299956639812
Chr1	5955556	5959783	mRNA	+	VDAG_JR2_Chr1g18730.1	0.0	43.0	0	0.0	-0.3010299956639812
Chr1	5959634	5962589	mRNA	-	VDAG_JR2_Chr1g18740.1	0.0	43.0	0	0.0	-0.3010299956639812
Chr1	5964773	5967390	mRNA	+	VDAG_JR2_Chr1g18750.1	0.0	43.0	0	0.0	-0.3010299956639812
Chr1	5967537	5969943	mRNA	-	VDAG_JR2_Chr1g18760.1	0.0	43.0	0	0.0	-0.3010299956639812
Chr1	5970386	5980807	mRNA	+	VDAG_JR2_Chr1g18770.1	0.0	43.0	0	0.0	-0.3010299956639812
Chr1	5981353	5984897	mRNA	+	VDAG_JR2_Chr1g18780.1	0.0	43.0	0	0.0	-0.3010299956639812
Chr1	5984982	5988071	mRNA	+	VDAG_JR2_Chr1g18790.1	0.0	43.0	0	0.25806451612903225	-0.12029383156253641
Chr1	5988266	5991403	mRNA	-	VDAG_JR2_Chr1g18800.1	0.0	43.0	0	0.5161290322580645	0.006948859955327825
Chr1	5991535	5993333	mRNA	-	VDAG_JR2_Chr1g18810.1	0.0	43.0	0	0.8333333333333334	0.1249387366083
Chr1	5993895	5998189	mRNA	-	VDAG_JR2_Chr1g18820.1	0.0	43.0	0	0.0	-0.3010299956639812
Chr1	5998825	6001196	mRNA	-	VDAG_JR2_Chr1g18830.1	0.0	43.0	0	0.0	-0.3010299956639812
Chr1	6001961	6003112	mRNA	+	VDAG_JR2_Chr1g18840.1	0.0	43.0	0	2.6363636363636362	0.49642640991504905
Chr1	6003904	6005685	mRNA	+	VDAG_JR2_Chr1g18850.1	0.0	43.0	0	1.1666666666666667	0.2218487496163564
Chr1	6005898	6007797	mRNA	-	VDAG_JR2_Chr1g18860.1	0.0	43.0	0	0.0	-0.3010299956639812
Chr1	6008208	6008813	mRNA	+	VDAG_JR2_Chr1g18870.1	0.0	43.0	0	0.0	-0.3010299956639812
Chr1	6009135	6014409	mRNA	-	VDAG_JR2_Chr1g18880.1	0.0	43.0	0	0.0	-0.3010299956639812
Chr1	6014788	6016045	mRNA	+	VDAG_JR2_Chr1g18890.1	0.0	43.0	0	3.4166666666666665	0.5929166118880926
Chr1	6016239	6019540	mRNA	-	VDAG_JR2_Chr1g18900.1	0.0	43.0	0	0.0	-0.3010299956639812
Chr1	6019758	6020647	mRNA	+	VDAG_JR2_Chr1g18910.1	1.0	41.0	0	0.125	-0.2041199826559248
Chr1	6020647	6024963	mRNA	-	VDAG_JR2_Chr1g18920.1	0.0	43.0	0	0.0	-0.3010299956639812
Chr1	6025604	6026878	mRNA	+	VDAG_JR2_Chr1g18930.1	0.0	43.0	0	0.0	-0.3010299956639812
Chr1	6027262	6034686	mRNA	+	VDAG_JR2_Chr1g18940.1	0.0	43.0	0	0.013513513513513514	-0.28944812311416607
Chr1	6034923	6036192	mRNA	+	VDAG_JR2_Chr1g18950.1	0.0	43.0	0	3.5384615384615383	0.6062159510991201
Chr1	6036343	6037770	mRNA	-	VDAG_JR2_Chr1g18960.1	0.0	43.0	0	0.0	-0.3010299956639812
Chr1	6038034	6038604	mRNA	+	VDAG_JR2_Chr1g18970.1	0.0	43.0	0	0.0	-0.3010299956639812
Chr1	6041608	6044280	mRNA	-	VDAG_JR2_Chr1g18980.1	0.0	43.0	0	0.0	-0.3010299956639812
Chr1	6044700	6045825	mRNA	-	VDAG_JR2_Chr1g18990.1	0.0	43.0	0	0.18181818181818182	-0.16633142176652496
Chr1	6046352	6047207	mRNA	-	VDAG_JR2_Chr1g19000.1	0.0	43.0	0	0.375	-0.057991946977686754
Chr1	6047253	6048006	mRNA	-	VDAG_JR2_Chr1g19010.1	0.0	43.0	0	0.0	-0.3010299956639812
Chr1	6048264	6050300	mRNA	+	VDAG_JR2_Chr1g19020.1	0.0	43.0	0	1.05	0.1903316981702915
Chr1	6050394	6051230	mRNA	-	VDAG_JR2_Chr1g19030.1	2.0	40.0	0	6.5	0.8450980400142568
Chr1	6051916	6052671	mRNA	-	VDAG_JR2_Chr1g19040.1	0.0	43.0	0	0.0	-0.3010299956639812
Chr1	6053071	6053950	mRNA	+	VDAG_JR2_Chr1g19050.1	0.0	43.0	0	0.0	-0.3010299956639812
Chr1	6054025	6055187	mRNA	-	VDAG_JR2_Chr1g19060.1	0.0	43.0	0	0.0	-0.3010299956639812
Chr1	6055374	6057803	mRNA	+	VDAG_JR2_Chr1g19070.1	0.0	43.0	0	0.625	0.05115252244738129
Chr1	6057802	6059188	mRNA	-	VDAG_JR2_Chr1g19080.1	1.0	41.0	0	2.0714285714285716	0.41017446508904926
Chr1	6059705	6060768	mRNA	+	VDAG_JR2_Chr1g19090.1	0.0	43.0	0	0.7272727272727273	0.08894108333678108
Chr1	6061981	6064300	mRNA	-	VDAG_JR2_Chr1g19100.1	0.0	43.0	0	0.0	-0.3010299956639812
Chr1	6065439	6067088	mRNA	+	VDAG_JR2_Chr1g19110.1	0.0	43.0	0	0.0	-0.3010299956639812
Chr1	6067518	6068958	mRNA	+	VDAG_JR2_Chr1g19120.1	0.0	43.0	0	0.0	-0.3010299956639812
Chr1	6069869	6071737	mRNA	+	VDAG_JR2_Chr1g19130.1	0.0	43.0	0	0.1111111111111111	-0.21387981994508098
Chr1	6072191	6074273	mRNA	-	VDAG_JR2_Chr1g19140.1	0.0	43.0	0	0.0	-0.3010299956639812
Chr1	6074250	6075431	mRNA	+	VDAG_JR2_Chr1g19150.1	0.0	43.0	0	0.0	-0.3010299956639812
Chr1	6075164	6077199	mRNA	-	VDAG_JR2_Chr1g19160.1	0.0	43.0	0	0.0	-0.3010299956639812
Chr1	6077465	6078195	mRNA	-	VDAG_JR2_Chr1g19170.1	0.0	43.0	0	0.0	-0.3010299956639812
Chr1	6081067	6083564	mRNA	+	VDAG_JR2_Chr1g19180.1	0.0	43.0	0	0.04	-0.26760624017703144
Chr1	6083681	6086482	mRNA	+	VDAG_JR2_Chr1g19190.1	0.0	43.0	0	0.0	-0.3010299956639812
Chr1	6086669	6089688	mRNA	+	VDAG_JR2_Chr1g19200.1	0.0	43.0	0	0.0	-0.3010299956639812
Chr1	6089825	6091184	mRNA	-	VDAG_JR2_Chr1g19210.1	2.0	40.0	0	0.42857142857142855	-0.03218468337140124
Chr1	6091181	6093140	mRNA	-	VDAG_JR2_Chr1g19220.1	0.0	43.0	0	0.0	-0.3010299956639812
Chr1	6093407	6094078	mRNA	+	VDAG_JR2_Chr1g19230.1	0.0	43.0	0	0.0	-0.3010299956639812
Chr1	6094161	6096368	mRNA	+	VDAG_JR2_Chr1g19240.1	0.0	43.0	0	0.13636363636363635	-0.19629464514396822
Chr1	6096501	6098288	mRNA	-	VDAG_JR2_Chr1g19250.1	0.0	43.0	0	0.0	-0.3010299956639812
Chr1	6099839	6101497	mRNA	+	VDAG_JR2_Chr1g19260.1	0.0	43.0	0	0.0	-0.3010299956639812
Chr1	6101501	6102353	mRNA	-	VDAG_JR2_Chr1g19270.1	0.0	43.0	0	0.0	-0.3010299956639812
Chr1	6102675	6104177	mRNA	-	VDAG_JR2_Chr1g19280.1	0.0	43.0	0	0.0	-0.3010299956639812
Chr1	6104772	6108177	mRNA	+	VDAG_JR2_Chr1g19290.1	0.0	43.0	0	0.0	-0.3010299956639812
Chr1	6109357	6111371	mRNA	+	VDAG_JR2_Chr1g19300.1	0.0	43.0	0	0.0	-0.3010299956639812
Chr1	6114002	6116052	mRNA	-	VDAG_JR2_Chr1g19310.1	0.0	43.0	0	0.047619047619047616	-0.26152145438030755
Chr1	6120982	6123314	mRNA	-	VDAG_JR2_Chr1g19320.1	0.0	43.0	0	0.0	-0.3010299956639812
Chr1	6123405	6128329	mRNA	-	VDAG_JR2_Chr1g19330.1	0.0	43.0	0	0.0	-0.3010299956639812
Chr1	6129525	6130266	mRNA	-	VDAG_JR2_Chr1g19340.1	17.0	25.0	0	11.0	1.0606978403536116
Chr1	6130372	6132032	mRNA	-	VDAG_JR2_Chr1g19350.1	0.0	43.0	0	0.0	-0.3010299956639812
Chr1	6133600	6135063	mRNA	-	VDAG_JR2_Chr1g19360.1	0.0	43.0	0	0.0	-0.3010299956639812
Chr1	6136563	6150592	mRNA	-	VDAG_JR2_Chr1g19370.1	0.0	43.0	0	0.0	-0.3010299956639812
Chr1	6151345	6154284	mRNA	-	VDAG_JR2_Chr1g19380.1	0.0	43.0	0	0.1	-0.2218487496163564
Chr1	6155364	6159100	mRNA	-	VDAG_JR2_Chr1g19390.1	0.0	43.0	0	0.0	-0.3010299956639812
Chr1	6161474	6162473	mRNA	-	VDAG_JR2_Chr1g19400.1	0.0	43.0	0	0.0	-0.3010299956639812
Chr1	6162776	6164948	mRNA	+	VDAG_JR2_Chr1g19410.1	0.0	43.0	0	0.0	-0.3010299956639812
Chr1	6165332	6166039	mRNA	-	VDAG_JR2_Chr1g19420.1	0.0	43.0	0	0.0	-0.3010299956639812
Chr1	6166515	6168424	mRNA	-	VDAG_JR2_Chr1g19430.1	0.0	43.0	0	0.0	-0.3010299956639812
Chr1	6168542	6169638	mRNA	+	VDAG_JR2_Chr1g19440.1	0.0	43.0	0	0.0	-0.3010299956639812
Chr1	6170952	6174149	mRNA	+	VDAG_JR2_Chr1g19450.1	0.0	43.0	0	0.0	-0.3010299956639812
Chr1	6174439	6175415	mRNA	+	VDAG_JR2_Chr1g19460.1	0.0	43.0	0	0.0	-0.3010299956639812
Chr1	6176881	6178196	mRNA	+	VDAG_JR2_Chr1g19470.1	0.0	43.0	0	0.0	-0.3010299956639812
Chr1	6179852	6182429	mRNA	-	VDAG_JR2_Chr1g19480.1	0.0	43.0	0	0.0	-0.3010299956639812
Chr1	6182678	6184679	mRNA	+	VDAG_JR2_Chr1g19490.1	0.0	43.0	0	0.0	-0.3010299956639812
Chr1	6183936	6184015	mRNA	+	VDAG_JR2_Chr1g19500.1	0.0	43.0	0	0.0	-0.3010299956639812
Chr1	6184809	6185812	mRNA	+	VDAG_JR2_Chr1g19510.1	0.0	43.0	0	0.0	-0.3010299956639812
Chr1	6186212	6187804	mRNA	+	VDAG_JR2_Chr1g19520.1	0.0	43.0	0	0.0	-0.3010299956639812
Chr1	6189358	6193960	mRNA	+	VDAG_JR2_Chr1g19530.1	0.0	43.0	0	0.0	-0.3010299956639812
Chr1	6194191	6196956	mRNA	+	VDAG_JR2_Chr1g19540.1	0.0	43.0	0	0.8214285714285714	0.12104369272477576
Chr1	6196935	6198426	mRNA	-	VDAG_JR2_Chr1g19550.1	0.0	43.0	0	0.0	-0.3010299956639812
Chr1	6198631	6201286	mRNA	+	VDAG_JR2_Chr1g19560.1	0.0	43.0	0	0.0	-0.3010299956639812
Chr1	6201444	6202800	mRNA	+	VDAG_JR2_Chr1g19570.1	0.0	43.0	0	2.4285714285714284	0.46665582104149744
Chr1	6202688	6204428	mRNA	-	VDAG_JR2_Chr1g19580.1	2.0	40.0	0	0.4117647058823529	-0.04011722320798245
Chr1	6204630	6209871	mRNA	-	VDAG_JR2_Chr1g19590.1	0.0	43.0	0	0.18867924528301888	-0.16198300514431438
Chr1	6210136	6213681	mRNA	-	VDAG_JR2_Chr1g19600.1	0.0	43.0	0	0.0	-0.3010299956639812
Chr1	6217164	6218582	mRNA	+	VDAG_JR2_Chr1g19610.1	0.0	43.0	0	0.07142857142857142	-0.24303804868629447
Chr1	6219177	6221400	mRNA	-	VDAG_JR2_Chr1g19620.1	0.0	43.0	0	0.0	-0.3010299956639812
Chr1	6221565	6224399	mRNA	+	VDAG_JR2_Chr1g19630.1	0.0	43.0	0	0.0	-0.3010299956639812
Chr1	6224501	6225702	mRNA	-	VDAG_JR2_Chr1g19640.1	0.0	43.0	0	0.0	-0.3010299956639812
Chr1	6225875	6227799	mRNA	+	VDAG_JR2_Chr1g19650.1	0.0	43.0	0	0.0	-0.3010299956639812
Chr1	6227779	6229612	mRNA	-	VDAG_JR2_Chr1g19660.1	0.0	43.0	0	0.0	-0.3010299956639812
Chr1	6230206	6231708	mRNA	-	VDAG_JR2_Chr1g19670.1	0.0	43.0	0	0.0	-0.3010299956639812
Chr1	6231916	6234564	mRNA	+	VDAG_JR2_Chr1g19680.1	0.0	43.0	0	0.07407407407407407	-0.24103206598869584
Chr1	6238122	6239978	mRNA	-	VDAG_JR2_Chr1g19690.1	0.0	43.0	0	0.0	-0.3010299956639812
Chr1	6239996	6242053	mRNA	+	VDAG_JR2_Chr1g19700.1	0.0	43.0	0	0.0	-0.3010299956639812
Chr1	6242001	6243847	mRNA	-	VDAG_JR2_Chr1g19710.1	0.0	43.0	0	0.0	-0.3010299956639812
Chr1	6244876	6246630	mRNA	+	VDAG_JR2_Chr1g19720.1	0.0	43.0	0	0.0	-0.3010299956639812
Chr1	6247694	6248837	mRNA	+	VDAG_JR2_Chr1g19730.1	0.0	43.0	0	0.0	-0.3010299956639812
Chr1	6248822	6249897	mRNA	-	VDAG_JR2_Chr1g19740.1	0.0	43.0	0	0.0	-0.3010299956639812
Chr1	6249959	6252612	mRNA	+	VDAG_JR2_Chr1g19750.1	0.0	43.0	0	0.0	-0.3010299956639812
Chr1	6253457	6257025	mRNA	+	VDAG_JR2_Chr1g19760.1	0.0	43.0	0	0.0	-0.3010299956639812
Chr1	6257132	6259905	mRNA	-	VDAG_JR2_Chr1g19770.1	0.0	43.0	0	0.0	-0.3010299956639812
Chr1	6260852	6263100	mRNA	-	VDAG_JR2_Chr1g19780.1	0.0	43.0	0	0.0	-0.3010299956639812
Chr1	6264052	6266615	mRNA	+	VDAG_JR2_Chr1g19790.1	0.0	43.0	0	0.6	0.04139268515822508
Chr1	6266586	6270371	mRNA	-	VDAG_JR2_Chr1g19800.1	0.0	43.0	0	0.0	-0.3010299956639812
Chr1	6272860	6274151	mRNA	+	VDAG_JR2_Chr1g19810.1	0.0	43.0	0	0.0	-0.3010299956639812
Chr1	6273948	6274904	mRNA	-	VDAG_JR2_Chr1g19820.1	0.0	43.0	0	0.0	-0.3010299956639812
Chr1	6274994	6276647	mRNA	+	VDAG_JR2_Chr1g19830.1	0.0	43.0	0	0.0	-0.3010299956639812
Chr1	6277096	6278916	mRNA	-	VDAG_JR2_Chr1g19840.1	0.0	43.0	0	0.0	-0.3010299956639812
Chr1	6280596	6283796	mRNA	+	VDAG_JR2_Chr1g19850.1	0.0	43.0	0	0.0	-0.3010299956639812
Chr1	6284331	6288664	mRNA	-	VDAG_JR2_Chr1g19860.1	8.0	34.0	0	0.22727272727272727	-0.13830269816628143
Chr1	6289264	6291748	mRNA	+	VDAG_JR2_Chr1g19870.1	0.0	43.0	0	0.0	-0.3010299956639812
Chr1	6298552	6301441	mRNA	-	VDAG_JR2_Chr1g19880.1	0.0	43.0	0	0.39285714285714285	-0.04921802267018164
Chr1	6305108	6306255	mRNA	-	VDAG_JR2_Chr1g19890.1	0.0	43.0	0	3.0833333333333335	0.5542872095319618
Chr1	6306516	6310002	mRNA	+	VDAG_JR2_Chr1g19900.1	0.0	43.0	0	0.05714285714285714	-0.2540334329877576
Chr1	6310010	6311666	mRNA	-	VDAG_JR2_Chr1g19910.1	0.0	43.0	0	1.2352941176470589	0.2393730945998891
Chr1	6312718	6314945	mRNA	-	VDAG_JR2_Chr1g19920.1	0.0	43.0	0	2.0454545454545454	0.4057653461839942
Chr1	6315272	6318570	mRNA	-	VDAG_JR2_Chr1g19930.1	0.0	43.0	0	0.0	-0.3010299956639812
Chr1	6320698	6323040	mRNA	-	VDAG_JR2_Chr1g19940.1	0.0	43.0	0	0.0	-0.3010299956639812
Chr1	6324007	6326033	mRNA	+	VDAG_JR2_Chr1g19950.1	0.0	43.0	0	0.0	-0.3010299956639812
Chr1	6326370	6328406	mRNA	+	VDAG_JR2_Chr1g19960.1	0.0	43.0	0	0.0	-0.3010299956639812
Chr1	6329250	6331588	mRNA	+	VDAG_JR2_Chr1g19970.1	0.0	43.0	0	0.0	-0.3010299956639812
Chr1	6333263	6335030	mRNA	+	VDAG_JR2_Chr1g19980.1	0.0	43.0	0	0.0	-0.3010299956639812
Chr1	6337168	6340019	mRNA	+	VDAG_JR2_Chr1g19990.1	0.0	43.0	0	0.2857142857142857	-0.104735350520013
[truncated: 9,430 more rows]
