# Supplementary material for: A unique chromatin profile defines adaptive genomic regions in a fungal plant pathogen
Source: eLife journal article supplement (doi:10.7554/elife.62208), 2020-12-18
Supplement: supp [file elife-62208-supp-v1.zip › elife_poa_e62208_Figure_6_source_data_3.txt]

Chrom	Start	End	Name	Absent_c	Present_c	CoreDesig	Absent_mean	Absent_median	log10_mean	log10_median
Chr1	53070	53543	Chr1_53070_53543_+	5.0	37.0	0	2.0	1.5	0.3979400086720376	0.3010299956639812
Chr1	53543	59523	Chr1_53543_59523_+	4.0	38.0	0	11.80327868852459	13.0	1.0900208615685223	1.130333768495006
Chr1	59523	59996	Chr1_59523_59996_+	17.0	25.0	0	8.0	7.0	0.9294189257142927	0.8750612633917001
Chr1	60564	62834	Chr1_60564_62834_-	29.0	13.0	0	26.583333333333332	27.0	1.4327021149312495	1.4393326938302626
Chr1	67298	67935	Chr1_67298_67935_-	12.0	30.0	0	16.375	15.0	1.2272437815030626	1.1903316981702914
Chr1	68221	75736	Chr1_68221_75736_+	4.0	38.0	0	17.855263157894736	17.5	1.263760615328825	1.255272505103306
Chr1	75547	75768	Chr1_75547_75768_-	4.0	38.0	0	6.666666666666667	7.0	0.8553172051959429	0.8750612633917001
Chr1	76190	76498	Chr1_76190_76498_-	10.0	32.0	0	12.25	12.5	1.105510184769974	1.1139433523068367
Chr1	76508	88067	Chr1_76508_88067_-	10.0	32.0	0	18.801724137931036	20.5	1.2855961043521118	1.3222192947339193
Chr1	77329	87099	Chr1_77329_87099_+	22.0	20.0	0	19.836734693877553	21.5	1.3082812230079928	1.3424226808222062
Chr1	87383	89131	Chr1_87383_89131_-	19.0	23.0	0	17.105263157894736	18.0	1.245642521151013	1.2671717284030137
Chr1	88037	93751	Chr1_88037_93751_-	18.0	24.0	0	20.655172413793103	20.0	1.325416569164067	1.3117538610557542
Chr1	93751	94467	Chr1_93751_94467_-	8.0	34.0	0	8.625	8.5	0.9602328731285124	0.9542425094393249
Chr1	94461	94827	Chr1_94461_94827_+	7.0	35.0	0	7.8	6.0	0.919078092376074	0.8129133566428556
Chr1	94834	95062	Chr1_94834_95062_+	21.0	21.0	0	27.666666666666668	30.0	1.44973545423003	1.4842998393467859
Chr1	95054	95417	Chr1_95054_95417_-	30.0	12.0	0	29.4	29.0	1.4756711883244296	1.469822015978163
Chr1	95418	95688	Chr1_95418_95688_+	29.0	13.0	0	14.666666666666666	8.0	1.18089014193745	0.9294189257142927
Chr1	219603	220043	Chr1_219603_220043_+	0.0	43.0	0	0.0	0.0	-0.3010299956639812	-0.3010299956639812
Chr1	321817	322023	Chr1_321817_322023_+	0.0	43.0	0	0.0	0.0	-0.3010299956639812	-0.3010299956639812
Chr1	325496	325621	Chr1_325496_325621_-	0.0	43.0	0	0.0	0.0	-0.3010299956639812	-0.3010299956639812
Chr1	396076	396181	Chr1_396076_396181_-	0.0	43.0	0	0.0	0.0	-0.3010299956639812	-0.3010299956639812
Chr1	461447	462151	Chr1_461447_462151_-	0.0	43.0	0	5.625	4.0	0.7871060930365701	0.6532125137753437
Chr1	462160	462636	Chr1_462160_462636_+	10.0	32.0	0	15.166666666666666	16.0	1.194976603216055	1.2174839442139063
Chr1	462707	463343	Chr1_462707_463343_-	17.0	25.0	0	18.428571428571427	18.0	1.2771178382585697	1.2671717284030137
Chr1	463343	468447	Chr1_463343_468447_+	22.0	20.0	0	20.615384615384617	21.0	1.324598996479274	1.3324384599156054
Chr1	468440	469079	Chr1_468440_469079_-	21.0	21.0	0	14.285714285714286	15.0	1.1698423097786796	1.1903316981702914
Chr1	470295	470503	Chr1_470295_470503_-	7.0	35.0	0	6.25	6.0	0.829303772831025	0.8129133566428556
Chr1	472319	472467	Chr1_472319_472467_+	5.0	37.0	0	4.5	4.5	0.6989700043360189	0.6989700043360189
Chr1	474513	474981	Chr1_474513_474981_+	17.0	25.0	0	17.8	17.0	1.2624510897304295	1.2430380486862944
Chr1	474981	480965	Chr1_474981_480965_+	14.0	28.0	0	19.75409836065574	19.0	1.306512914727331	1.290034611362518
Chr1	480965	481433	Chr1_480965_481433_+	24.0	18.0	0	15.833333333333334	17.0	1.2130748253088512	1.2430380486862944
Chr1	481433	483682	Chr1_481433_483682_+	13.0	29.0	0	19.47826086956522	21.0	1.3005576797045373	1.3324384599156054
Chr1	484786	484990	Chr1_484786_484990_+	6.0	36.0	0	2.3333333333333335	1.0	0.4522976709946303	0.17609125905568124
Chr1	538678	538842	Chr1_538678_538842_+	0.0	43.0	0	0.0	0.0	-0.3010299956639812	-0.3010299956639812
Chr1	542459	542651	Chr1_542459_542651_+	0.0	43.0	0	0.0	0.0	-0.3010299956639812	-0.3010299956639812
Chr1	543616	543766	Chr1_543616_543766_-	5.0	37.0	0	7.5	7.5	0.9030899869919435	0.9030899869919435
Chr1	544152	544429	Chr1_544152_544429_-	10.0	32.0	0	13.5	13.5	1.146128035678238	1.146128035678238
Chr1	544436	545987	Chr1_544436_545987_+	15.0	27.0	0	26.1875	26.0	1.426307892369099	1.423245873936808
Chr1	545997	550063	Chr1_545997_550063_+	34.0	8.0	0	34.404761904761905	36.0	1.5428846799072087	1.5622928644564746
Chr1	550070	550459	Chr1_550070_550459_-	14.0	28.0	0	10.4	12.0	1.0374264979406236	1.0969100130080565
Chr1	550459	550600	Chr1_550459_550600_+	16.0	26.0	0	18.0	18.0	1.2671717284030137	1.2671717284030137
Chr1	550543	551183	Chr1_550543_551183_-	20.0	22.0	0	18.285714285714285	20.0	1.2738277128115199	1.3117538610557542
Chr1	551183	558085	Chr1_551183_558085_+	32.0	10.0	0	34.17142857142857	34.0	1.539971736317678	1.5378190950732742
Chr1	554671	556528	Chr1_554671_556528_-	33.0	9.0	0	32.1	32.0	1.513217600067939	1.5118833609788744
Chr1	558076	561558	Chr1_558076_561558_+	27.0	15.0	0	34.22222222222222	35.0	1.5406075122407692	1.550228353055094
Chr1	562159	563040	Chr1_562159_563040_+	32.0	10.0	0	31.2	34.0	1.5010592622177514	1.5378190950732742
Chr1	563014	570515	Chr1_563014_570515_+	12.0	30.0	0	21.18421052631579	23.0	1.3361436150803057	1.3710678622717363
Chr1	567253	569379	Chr1_567253_569379_+	11.0	31.0	0	23.545454545454547	25.0	1.3810329912129795	1.4065401804339552
Chr1	570524	571384	Chr1_570524_571384_+	15.0	27.0	0	33.22222222222222	36.0	1.5279161859719514	1.5622928644564746
Chr1	571384	572807	Chr1_571384_572807_+	36.0	6.0	0	25.5625	28.5	1.4160160723178328	1.462397997898956
Chr1	572805	573441	Chr1_572805_573441_+	1.0	41.0	0	13.857142857142858	19.0	1.1570680217422509	1.290034611362518
Chr1	573555	574202	Chr1_573555_574202_+	32.0	10.0	0	26.75	31.0	1.4353665066126613	1.4983105537896004
Chr1	574282	581203	Chr1_574282_581203_-	30.0	12.0	0	24.04225352112676	24.0	1.3899144380509718	1.3891660843645324
Chr1	577829	579686	Chr1_577829_579686_+	33.0	9.0	0	32.05263157894737	32.0	1.5125861030123104	1.5118833609788744
Chr1	580023	580790	Chr1_580023_580790_+	21.0	21.0	0	20.875	21.0	1.3299061234002103	1.3324384599156054
Chr1	581203	581838	Chr1_581203_581838_+	30.0	12.0	0	20.428571428571427	24.0	1.3207395846758714	1.3891660843645324
Chr1	581921	587922	Chr1_581921_587922_+	26.0	16.0	0	28.327868852459016	29.0	1.4598125376421944	1.469822015978163
Chr1	587922	588789	Chr1_587922_588789_+	31.0	11.0	0	25.88888888888889	30.0	1.4214211045215606	1.4842998393467859
Chr1	588851	589440	Chr1_588851_589440_+	34.0	8.0	0	35.42857142857143	35.0	1.5554399493776894	1.550228353055094
Chr1	589489	590789	Chr1_589489_590789_+	36.0	6.0	0	34.0	34.0	1.5378190950732742	1.5378190950732742
Chr1	590846	591567	Chr1_590846_591567_+	29.0	13.0	0	23.875	23.5	1.3869446243705745	1.380211241711606
Chr1	591671	592305	Chr1_591671_592305_-	29.0	13.0	0	25.25	26.5	1.4107772333772097	1.4313637641589874
Chr1	592333	605805	Chr1_592333_605805_-	19.0	23.0	0	30.00735294117647	32.0	1.4844045264587555	1.5118833609788744
Chr1	595036	595353	Chr1_595036_595353_+	25.0	17.0	0	26.75	26.0	1.4353665066126613	1.423245873936808
Chr1	595362	598550	Chr1_595362_598550_+	25.0	17.0	0	31.636363636363637	32.0	1.5069967329746932	1.5118833609788744
Chr1	599150	602362	Chr1_599150_602362_+	30.0	12.0	0	32.75757575757576	33.0	1.5218905890362715	1.5250448070368452
Chr1	602424	603714	Chr1_602424_603714_+	31.0	11.0	0	32.642857142857146	33.0	1.520389944876643	1.5250448070368452
Chr1	603753	604460	Chr1_603753_604460_+	33.0	9.0	0	22.125	20.5	1.354588587877241	1.3222192947339193
Chr1	605805	612633	Chr1_605805_612633_-	10.0	32.0	0	16.753623188405797	16.0	1.2368803090036433	1.2174839442139063
Chr1	612637	616059	Chr1_612637_616059_-	7.0	35.0	0	23.02857142857143	23.0	1.3715955591554976	1.3710678622717363
Chr1	616755	617402	Chr1_616755_617402_+	6.0	36.0	0	18.875	18.5	1.2872417111783478	1.2787536009528289
Chr1	617439	622306	Chr1_617439_622306_-	26.0	16.0	0	27.74	33.0	1.4508646923797661	1.5250448070368452
Chr1	618772	619416	Chr1_618772_619416_-	29.0	13.0	0	15.125	12.0	1.193820026016113	1.0969100130080565
Chr1	622051	622570	Chr1_622051_622570_+	36.0	6.0	0	31.166666666666668	33.0	1.5006023505691855	1.5250448070368452
Chr1	622570	630080	Chr1_622570_630080_+	14.0	28.0	0	26.986842105263158	28.0	1.4391248476995173	1.4548448600085102
Chr1	627288	628944	Chr1_627288_628944_+	28.0	14.0	0	29.833333333333332	29.0	1.481920137601431	1.469822015978163
Chr1	630087	630759	Chr1_630087_630759_-	14.0	28.0	0	33.75	37.0	1.5346605758284444	1.5740312677277188
Chr1	630759	631393	Chr1_630759_631393_+	37.0	5.0	0	37.0	37.0	1.5740312677277188	1.5740312677277188
Chr1	631524	632156	Chr1_631524_632156_+	36.0	6.0	0	34.42857142857143	35.0	1.5431808234453823	1.550228353055094
Chr1	632236	641655	Chr1_632236_641655_-	23.0	19.0	0	18.073684210526316	16.0	1.2688980574071402	1.2174839442139063
Chr1	633698	640273	Chr1_633698_640273_-	25.0	17.0	0	13.970149253731343	14.0	1.1604730107138976	1.1613680022349748
Chr1	641211	641476	Chr1_641211_641476_-	9.0	33.0	0	9.333333333333334	9.0	0.9927007612585006	0.9777236052888477
Chr1	641697	642004	Chr1_641697_642004_-	33.0	9.0	0	30.2	33.0	1.4871383754771865	1.5250448070368452
Chr1	642050	644579	Chr1_642050_644579_-	16.0	26.0	0	27.615384615384617	32.5	1.4489440289870426	1.5185139398778875
Chr1	644580	651804	Chr1_644580_651804_-	19.0	23.0	0	26.783783783783782	28.0	1.4359045992126631	1.4548448600085102
Chr1	651804	653407	Chr1_651804_653407_-	36.0	6.0	0	33.94117647058823	34.0	1.537077978030108	1.5378190950732742
Chr1	653407	662141	Chr1_653407_662141_+	36.0	6.0	0	29.34090909090909	29.5	1.474812049603292	1.4771212547196624
Chr1	662148	662820	Chr1_662148_662820_-	35.0	7.0	0	38.375	39.0	1.589670402034894	1.5965970956264601
Chr1	662820	663454	Chr1_662820_663454_+	38.0	4.0	0	38.714285714285715	39.0	1.593444308771854	1.5965970956264601
Chr1	663569	664217	Chr1_663569_664217_+	39.0	3.0	0	37.5	38.5	1.5797835966168101	1.591064607026499
Chr1	664296	669385	Chr1_664296_669385_-	34.0	8.0	0	29.115384615384617	30.5	1.4715173772016639	1.4913616938342726
Chr1	669385	669708	Chr1_669385_669708_+	29.0	13.0	0	24.0	27.0	1.3891660843645324	1.4393326938302626
Chr1	669708	677202	Chr1_669708_677202_-	8.0	34.0	0	21.61842105263158	22.5	1.3447541211586795	1.3617278360175928
Chr1	677207	677525	Chr1_677207_677525_+	24.0	18.0	0	24.25	24.0	1.3935752032695876	1.3891660843645324
Chr1	677608	678914	Chr1_677608_678914_-	14.0	28.0	0	18.357142857142858	15.5	1.275475891191593	1.2041199826559248
Chr1	678914	679123	Chr1_678914_679123_+	16.0	26.0	0	18.666666666666668	18.0	1.2825465899699682	1.2671717284030137
Chr1	679124	680123	Chr1_679124_680123_-	22.0	20.0	0	23.181818181818183	25.0	1.3744150424773183	1.4065401804339552
Chr1	681281	681489	Chr1_681281_681489_+	0.0	43.0	0	0.0	0.0	-0.3010299956639812	-0.3010299956639812
Chr1	701259	701458	Chr1_701259_701458_-	0.0	43.0	0	0.0	0.0	-0.3010299956639812	-0.3010299956639812
Chr1	704463	704633	Chr1_704463_704633_-	0.0	43.0	0	0.0	0.0	-0.3010299956639812	-0.3010299956639812
Chr1	730423	730630	Chr1_730423_730630_+	1.0	41.0	0	11.0	16.0	1.0606978403536116	1.2174839442139063
Chr1	730853	730965	Chr1_730853_730965_+	17.0	25.0	0	16.5	16.5	1.2304489213782739	1.2304489213782739
Chr1	731027	731499	Chr1_731027_731499_+	17.0	25.0	0	16.4	17.0	1.2278867046136734	1.2430380486862944
Chr1	731499	737840	Chr1_731499_737840_+	17.0	25.0	0	10.846153846153847	12.0	1.054848668007345	1.0969100130080565
Chr1	737992	738465	Chr1_737992_738465_+	15.0	27.0	0	6.666666666666667	5.0	0.8553172051959429	0.7403626894942439
Chr1	738465	742192	Chr1_738465_742192_+	2.0	40.0	0	6.815789473684211	5.0	0.8642611993012661	0.7403626894942439
Chr1	742192	749021	Chr1_742192_749021_+	6.0	36.0	0	16.5	15.0	1.2304489213782739	1.1903316981702914
Chr1	749021	749764	Chr1_749021_749764_+	13.0	29.0	0	11.875	11.5	1.0925452076056064	1.0791812460476249
Chr1	749929	754086	Chr1_749929_754086_+	13.0	29.0	0	11.952380952380953	13.0	1.0952523984693738	1.130333768495006
Chr1	815425	817287	Chr1_815425_817287_-	3.0	39.0	0	28.894736842105264	32.0	1.468269576498799	1.5118833609788744
Chr1	990878	991001	Chr1_990878_991001_+	0.0	43.0	0	0.0	0.0	-0.3010299956639812	-0.3010299956639812
Chr1	995320	995428	Chr1_995320_995428_+	0.0	43.0	0	0.0	0.0	-0.3010299956639812	-0.3010299956639812
Chr1	1720663	1720924	Chr1_1720663_1720924_+	1.0	41.0	0	1.25	1.0	0.24303804868629444	0.17609125905568124
Chr1	1750365	1750493	Chr1_1750365_1750493_+	0.0	43.0	0	1.0	1.0	0.17609125905568124	0.17609125905568124
Chr1	1750867	1751063	Chr1_1750867_1751063_-	2.0	40.0	0	2.0	2.0	0.3979400086720376	0.3979400086720376
Chr1	1751131	1751242	Chr1_1751131_1751242_-	2.0	40.0	0	2.0	2.0	0.3979400086720376	0.3979400086720376
Chr1	1751519	1751643	Chr1_1751519_1751643_+	2.0	40.0	0	1.0	1.0	0.17609125905568124	0.17609125905568124
Chr1	1765097	1765276	Chr1_1765097_1765276_+	0.0	43.0	0	0.0	0.0	-0.3010299956639812	-0.3010299956639812
Chr1	1765611	1765863	Chr1_1765611_1765863_+	0.0	43.0	0	0.0	0.0	-0.3010299956639812	-0.3010299956639812
Chr1	1767588	1767760	Chr1_1767588_1767760_-	0.0	43.0	0	0.0	0.0	-0.3010299956639812	-0.3010299956639812
Chr1	1831768	1831913	Chr1_1831768_1831913_-	0.0	43.0	0	0.0	0.0	-0.3010299956639812	-0.3010299956639812
Chr1	1832254	1832394	Chr1_1832254_1832394_-	0.0	43.0	0	0.0	0.0	-0.3010299956639812	-0.3010299956639812
Chr1	1857720	1858571	Chr1_1857720_1858571_+	18.0	24.0	0	18.555555555555557	18.0	1.2800216149394645	1.2671717284030137
Chr1	1914650	1914780	Chr1_1914650_1914780_-	0.0	43.0	0	0.0	0.0	-0.3010299956639812	-0.3010299956639812
Chr1	1928298	1928555	Chr1_1928298_1928555_-	0.0	43.0	0	0.0	0.0	-0.3010299956639812	-0.3010299956639812
Chr1	2107069	2107238	Chr1_2107069_2107238_-	0.0	43.0	0	0.0	0.0	-0.3010299956639812	-0.3010299956639812
Chr1	2126458	2126733	Chr1_2126458_2126733_-	0.0	43.0	0	0.0	0.0	-0.3010299956639812	-0.3010299956639812
Chr1	2264163	2264290	Chr1_2264163_2264290_+	0.0	43.0	0	0.0	0.0	-0.3010299956639812	-0.3010299956639812
Chr1	2426795	2426922	Chr1_2426795_2426922_-	0.0	43.0	0	0.0	0.0	-0.3010299956639812	-0.3010299956639812
Chr1	2589207	2589437	Chr1_2589207_2589437_-	2.0	40.0	0	10.0	2.0	1.021189299069938	0.3979400086720376
Chr1	2608121	2608252	Chr1_2608121_2608252_+	0.0	43.0	0	0.0	0.0	-0.3010299956639812	-0.3010299956639812
Chr1	2642274	2642500	Chr1_2642274_2642500_+	0.0	43.0	0	0.0	0.0	-0.3010299956639812	-0.3010299956639812
Chr1	2664310	2664637	Chr1_2664310_2664637_+	0.0	43.0	0	0.0	0.0	-0.3010299956639812	-0.3010299956639812
Chr1	2898889	2899138	Chr1_2898889_2899138_+	0.0	43.0	0	2.75	1.0	0.5118833609788743	0.17609125905568124
Chr1	2902100	2902253	Chr1_2902100_2902253_-	20.0	22.0	0	10.0	10.0	1.021189299069938	1.021189299069938
Chr1	2919564	2919752	Chr1_2919564_2919752_-	0.0	43.0	0	1.0	0.0	0.17609125905568124	-0.3010299956639812
Chr1	2919808	2919967	Chr1_2919808_2919967_-	1.0	41.0	0	3.5	3.5	0.6020599913279624	0.6020599913279624
Chr1	2919969	2920166	Chr1_2919969_2920166_+	6.0	36.0	0	6.0	6.0	0.8129133566428556	0.8129133566428556
Chr1	2920249	2920632	Chr1_2920249_2920632_-	3.0	39.0	0	3.6	3.0	0.6127838567197355	0.5440680443502757
Chr1	2920633	2923093	Chr1_2920633_2923093_-	9.0	33.0	0	19.12	22.0	1.2926990030439298	1.3521825181113625
Chr1	2923093	2936287	Chr1_2923093_2936287_+	27.0	15.0	0	23.548872180451127	24.0	1.3810947140864958	1.3891660843645324
Chr1	2926720	2934291	Chr1_2926720_2934291_-	16.0	26.0	0	24.07894736842105	24.0	1.3905632796132832	1.3891660843645324
Chr1	2936322	2938241	Chr1_2936322_2938241_+	31.0	11.0	0	27.65	27.0	1.449478399187365	1.4393326938302626
Chr1	2938241	2943174	Chr1_2938241_2943174_-	13.0	29.0	0	15.34	15.0	1.1997551772534747	1.1903316981702914
Chr1	2943173	2943320	Chr1_2943173_2943320_+	19.0	23.0	0	25.0	27.0	1.4065401804339552	1.4393326938302626
Chr1	2943439	2944188	Chr1_2943439_2944188_+	29.0	13.0	0	28.0	29.0	1.4548448600085102	1.469822015978163
Chr1	2944193	2944317	Chr1_2944193_2944317_-	21.0	21.0	0	14.333333333333334	16.0	1.1712387562612692	1.2174839442139063
Chr1	2944317	2944785	Chr1_2944317_2944785_-	6.0	36.0	0	16.8	15.0	1.2380461031287955	1.1903316981702914
Chr1	2944970	2954602	Chr1_2944970_2954602_+	27.0	15.0	0	23.744897959183675	26.5	1.3846203606166612	1.4313637641589874
Chr1	2946743	2947439	Chr1_2946743_2947439_+	36.0	6.0	0	25.5	24.5	1.414973347970818	1.3979400086720377
Chr1	2947383	2952583	Chr1_2947383_2952583_-	18.0	24.0	0	16.71698113207547	15.0	1.2359570035277232	1.1903316981702914
Chr1	2951404	2952170	Chr1_2951404_2952170_+	23.0	19.0	0	16.0	14.0	1.2174839442139063	1.1613680022349748
Chr1	2952583	2953220	Chr1_2952583_2953220_+	36.0	6.0	0	34.625	35.0	1.5456163329131363	1.550228353055094
Chr1	2954602	2956861	Chr1_2954602_2956861_+	29.0	13.0	0	33.608695652173914	35.0	1.5328651119053627	1.550228353055094
Chr1	2956861	2974263	Chr1_2956861_2974263_-	31.0	11.0	0	25.50857142857143	26.0	1.415116498380916	1.423245873936808
Chr1	2959625	2967196	Chr1_2959625_2967196_+	15.0	27.0	0	25.276315789473685	26.0	1.411220843713945	1.423245873936808
Chr1	2974263	2974931	Chr1_2974263_2974931_+	27.0	15.0	0	27.375	28.5	1.4452148760562171	1.462397997898956
Chr1	2974931	2975113	Chr1_2974931_2975113_+	25.0	17.0	0	25.333333333333332	25.0	1.4121804477866478	1.4065401804339552
Chr1	2975123	2982694	Chr1_2975123_2982694_-	22.0	20.0	0	25.57894736842105	27.5	1.4162900578684652	1.4471580313422192
Chr1	2982697	2991839	Chr1_2982697_2991839_+	30.0	12.0	0	27.78494623655914	29.0	1.4515553575792428	1.469822015978163
Chr1	2984150	2991721	Chr1_2984150_2991721_-	24.0	18.0	0	29.025974025974026	30.0	1.4702042333686451	1.4842998393467859
Chr1	2991839	2997565	Chr1_2991839_2997565_+	19.0	23.0	0	20.913793103448278	22.0	1.3306936022776241	1.3521825181113625
Chr1	2997565	3007461	Chr1_2997565_3007461_-	21.0	21.0	0	23.43	25.0	1.3789426986134374	1.4065401804339552
Chr1	3007461	3009089	Chr1_3007461_3009089_+	27.0	15.0	0	23.41176470588235	25.0	1.378611628551813	1.4065401804339552
Chr1	3009077	3012797	Chr1_3009077_3012797_+	12.0	30.0	0	22.63157894736842	25.0	1.3642052784569618	1.4065401804339552
Chr1	3012797	3020367	Chr1_3012797_3020367_-	20.0	22.0	0	22.61038961038961	25.0	1.3638072671673829	1.4065401804339552
Chr1	3020370	3024823	Chr1_3020370_3024823_-	1.0	41.0	0	18.847826086956523	19.0	1.2866321749633387	1.290034611362518
Chr1	3024854	3025188	Chr1_3024854_3025188_+	19.0	23.0	0	23.25	24.0	1.3756636139608853	1.3891660843645324
Chr1	3025188	3026424	Chr1_3025188_3026424_-	26.0	16.0	0	28.142857142857142	27.5	1.4570163369419442	1.4471580313422192
Chr1	3026424	3039826	Chr1_3026424_3039826_+	20.0	22.0	0	22.748148148148147	22.0	1.3663883644917234	1.3521825181113625
Chr1	3027193	3036924	Chr1_3027193_3036924_+	24.0	18.0	0	20.858585858585858	21.0	1.3295724948853693	1.3324384599156054
Chr1	3039887	3047449	Chr1_3039887_3047449_-	30.0	12.0	0	25.662337662337663	28.0	1.4176765465519148	1.4548448600085102
Chr1	3047455	3047791	Chr1_3047455_3047791_+	13.0	29.0	0	17.5	16.5	1.255272505103306	1.2304489213782739
Chr1	3047946	3048978	Chr1_3047946_3048978_-	32.0	10.0	0	24.90909090909091	25.0	1.404989127064217	1.4065401804339552
Chr1	3048978	3049084	Chr1_3048978_3049084_-	31.0	11.0	0	30.0	30.0	1.4842998393467859	1.4842998393467859
Chr1	3049096	3056665	Chr1_3049096_3056665_+	29.0	13.0	0	20.31168831168831	22.0	1.3183073130183731	1.3521825181113625
Chr1	3056665	3057803	Chr1_3056665_3057803_-	1.0	41.0	0	30.846153846153847	34.0	1.4961842607691587	1.5378190950732742
Chr1	3057803	3062860	Chr1_3057803_3062860_+	32.0	10.0	0	25.274509803921568	25.0	1.4111904143444451	1.4065401804339552
Chr1	3062869	3072648	Chr1_3062869_3072648_-	26.0	16.0	0	24.2020202020202	25.0	1.3927324725597512	1.4065401804339552
Chr1	3072637	3079341	Chr1_3072637_3079341_+	22.0	20.0	0	26.397058823529413	27.0	1.4297047927701805	1.4393326938302626
Chr1	3079355	3090778	Chr1_3079355_3090778_-	14.0	28.0	0	23.582608695652173	23.0	1.3817035291290907	1.3710678622717363
Chr1	3081430	3086320	Chr1_3081430_3086320_-	20.0	22.0	0	18.78	18.0	1.2851070295668119	1.2671717284030137
Chr1	3086419	3086572	Chr1_3086419_3086572_-	12.0	30.0	0	13.5	13.5	1.146128035678238	1.146128035678238
Chr1	3090778	3092474	Chr1_3090778_3092474_+	27.0	15.0	0	27.38888888888889	28.5	1.4454312120417132	1.462397997898956
Chr1	3092457	3092913	Chr1_3092457_3092913_+	10.0	32.0	0	13.5	14.0	1.146128035678238	1.1613680022349748
Chr1	3092910	3093054	Chr1_3092910_3093054_+	15.0	27.0	0	13.0	13.0	1.130333768495006	1.130333768495006
Chr1	3093055	3093252	Chr1_3093055_3093252_+	11.0	31.0	0	6.0	4.0	0.8129133566428556	0.6532125137753437
Chr1	3093335	3093503	Chr1_3093335_3093503_-	8.0	34.0	0	9.333333333333334	9.0	0.9927007612585006	0.9777236052888477
Chr1	3093469	3093583	Chr1_3093469_3093583_+	9.0	33.0	0	10.0	10.0	1.021189299069938	1.021189299069938
Chr1	3093583	3093889	Chr1_3093583_3093889_-	11.0	31.0	0	15.0	16.0	1.1903316981702914	1.2174839442139063
Chr1	3094078	3094336	Chr1_3094078_3094336_-	6.0	36.0	0	2.5	1.5	0.47712125471966244	0.3010299956639812
Chr1	3135455	3135688	Chr1_3135455_3135688_-	0.0	43.0	0	0.0	0.0	-0.3010299956639812	-0.3010299956639812
Chr1	3314870	3315187	Chr1_3314870_3315187_-	0.0	43.0	0	0.0	0.0	-0.3010299956639812	-0.3010299956639812
Chr1	3362930	3363184	Chr1_3362930_3363184_+	0.0	43.0	0	0.0	0.0	-0.3010299956639812	-0.3010299956639812
Chr1	3370436	3370753	Chr1_3370436_3370753_-	0.0	43.0	0	0.0	0.0	-0.3010299956639812	-0.3010299956639812
Chr1	3566797	3568362	Chr1_3566797_3568362_+	0.0	43.0	0	0.0	0.0	-0.3010299956639812	-0.3010299956639812
Chr1	3568474	3568841	Chr1_3568474_3568841_+	0.0	43.0	0	0.0	0.0	-0.3010299956639812	-0.3010299956639812
Chr1	3568899	3569052	Chr1_3568899_3569052_+	0.0	43.0	0	0.0	0.0	-0.3010299956639812	-0.3010299956639812
Chr1	3714645	3714853	Chr1_3714645_3714853_+	0.0	43.0	0	0.0	0.0	-0.3010299956639812	-0.3010299956639812
Chr1	3728450	3728926	Chr1_3728450_3728926_+	2.0	40.0	1	13.166666666666666	14.5	1.135662602000073	1.1760912590556813
Chr1	3728926	3734909	Chr1_3728926_3734909_+	17.0	25.0	1	19.131147540983605	18.0	1.2929456870758338	1.2671717284030137
Chr1	3734909	3735385	Chr1_3734909_3735385_+	18.0	24.0	0	14.6	17.0	1.1789769472931695	1.2430380486862944
Chr1	3735653	3736778	Chr1_3735653_3736778_-	2.0	40.0	0	20.333333333333332	22.0	1.3187587626244128	1.3521825181113625
Chr1	3736725	3737379	Chr1_3736725_3737379_+	6.0	36.0	0	5.857142857142857	3.0	0.8032619709666747	0.5440680443502757
Chr1	3737416	3742495	Chr1_3737416_3742495_-	17.0	25.0	0	16.823529411764707	15.0	1.2386363777448466	1.1903316981702914
Chr1	3741307	3742082	Chr1_3741307_3742082_+	17.0	25.0	0	16.5	16.5	1.2304489213782739	1.2304489213782739
Chr1	3742495	3743130	Chr1_3742495_3743130_+	20.0	22.0	0	12.0	11.5	1.0969100130080565	1.0791812460476249
Chr1	3744300	3751806	Chr1_3744300_3751806_-	26.0	16.0	0	30.776315789473685	32.5	1.4952155894473889	1.5185139398778875
Chr1	3745447	3747081	Chr1_3745447_3747081_-	37.0	5.0	0	32.705882352941174	33.0	1.5212150248827128	1.5250448070368452
Chr1	3752335	3752969	Chr1_3752335_3752969_-	28.0	14.0	0	26.714285714285715	28.0	1.4347969399973812	1.4548448600085102
Chr1	3754293	3766068	Chr1_3754293_3766068_-	20.0	22.0	0	21.445378151260503	21.0	1.3413430687804817	1.3324384599156054
Chr1	3755121	3761516	Chr1_3755121_3761516_-	22.0	20.0	0	17.692307692307693	16.0	1.2598877927669936	1.2174839442139063
Chr1	3761516	3761972	Chr1_3761516_3761972_-	28.0	14.0	0	30.0	28.0	1.4842998393467859	1.4548448600085102
Chr1	3766069	3766520	Chr1_3766069_3766520_+	25.0	17.0	0	29.333333333333332	29.5	1.4747017805962495	1.4771212547196624
Chr1	3766520	3772481	Chr1_3766520_3772481_+	34.0	8.0	0	22.35	21.5	1.3588862044058692	1.3424226808222062
Chr1	3772480	3779348	Chr1_3772480_3779348_+	31.0	11.0	0	27.37142857142857	27.5	1.4451592293802613	1.4471580313422192
Chr1	3779348	3785778	Chr1_3779348_3785778_+	35.0	7.0	0	23.630769230769232	23.0	1.3825711663909084	1.3710678622717363
Chr1	3785778	3785910	Chr1_3785778_3785910_-	21.0	21.0	0	25.666666666666668	25.0	1.4177484020255902	1.4065401804339552
Chr1	3786672	3786879	Chr1_3786672_3786879_+	7.0	35.0	0	5.0	4.0	0.7403626894942439	0.6532125137753437
Chr1	4189651	4189887	Chr1_4189651_4189887_-	0.0	43.0	0	0.0	0.0	-0.3010299956639812	-0.3010299956639812
Chr1	4250407	4250963	Chr1_4250407_4250963_-	2.0	40.0	0	11.833333333333334	15.5	1.0910804693473326	1.2041199826559248
Chr1	4250963	4251439	Chr1_4250963_4251439_+	5.0	37.0	0	13.666666666666666	14.5	1.151267675330649	1.1760912590556813
Chr1	4251439	4257422	Chr1_4251439_4257422_+	17.0	25.0	0	18.75409836065574	18.0	1.2845231861028577	1.2671717284030137
Chr1	4257422	4257898	Chr1_4257422_4257898_+	18.0	24.0	0	15.4	17.0	1.2013971243204515	1.2430380486862944
Chr1	4257898	4258863	Chr1_4257898_4258863_-	13.0	29.0	0	12.909090909090908	13.0	1.1273993351559568	1.130333768495006
Chr1	4258065	4260672	Chr1_4258065_4260672_+	19.0	23.0	0	12.88888888888889	13.0	1.1267445374715623	1.130333768495006
Chr1	4258866	4261472	Chr1_4258866_4261472_-	14.0	28.0	0	12.925925925925926	13.0	1.1279442467480252	1.130333768495006
Chr1	4261616	4261790	Chr1_4261616_4261790_-	20.0	22.0	0	20.5	20.5	1.3222192947339193	1.3222192947339193
Chr1	4261790	4265812	Chr1_4261790_4265812_+	21.0	21.0	0	2.5714285714285716	1.0	0.4873404199013485	0.17609125905568124
Chr1	4265812	4272641	Chr1_4265812_4272641_-	6.0	36.0	0	16.52173913043478	16.0	1.2310039303763693	1.2174839442139063
Chr1	4272641	4274462	Chr1_4272641_4274462_+	3.0	39.0	0	5.894736842105263	3.0	0.805822676981502	0.5440680443502757
Chr1	4274474	4275033	Chr1_4274474_4275033_+	19.0	23.0	0	17.285714285714285	16.0	1.2500713114174984	1.2174839442139063
Chr1	4275033	4275501	Chr1_4275033_4275501_+	16.0	26.0	0	12.5	16.0	1.1139433523068367	1.2174839442139063
Chr1	4275516	4281854	Chr1_4275516_4281854_-	20.0	22.0	0	10.9375	12.0	1.0583311070745047	1.0969100130080565
Chr1	4281854	4282287	Chr1_4281854_4282287_-	12.0	30.0	0	13.2	14.0	1.1367205671564067	1.1613680022349748
Chr1	4282349	4282461	Chr1_4282349_4282461_-	14.0	28.0	0	15.0	15.0	1.1903316981702914	1.1903316981702914
Chr1	4282681	4282880	Chr1_4282681_4282880_-	16.0	26.0	0	11.0	16.0	1.0606978403536116	1.2174839442139063
Chr1	4416590	4416785	Chr1_4416590_4416785_+	1.0	41.0	0	12.666666666666666	18.0	1.1194758409067977	1.2671717284030137
Chr1	4417008	4417120	Chr1_4417008_4417120_+	17.0	25.0	0	18.5	18.5	1.2787536009528289	1.2787536009528289
Chr1	4417182	4417603	Chr1_4417182_4417603_+	20.0	22.0	0	18.166666666666668	19.0	1.271066772286538	1.290034611362518
Chr1	4417603	4419646	Chr1_4417603_4419646_+	14.0	28.0	0	16.904761904761905	16.0	1.24066808655996	1.2174839442139063
Chr1	4419646	4420122	Chr1_4419646_4420122_+	4.0	38.0	0	2.3333333333333335	2.0	0.4522976709946303	0.3979400086720376
Chr1	4420122	4423425	Chr1_4420122_4423425_+	3.0	39.0	0	5.382352941176471	3.5	0.7695510786217261	0.6020599913279624
Chr1	4423425	4423901	Chr1_4423425_4423901_-	0.0	43.0	0	0.5	0.0	0.0	-0.3010299956639812
Chr1	4423901	4429884	Chr1_4423901_4429884_-	2.0	40.0	0	1.85	1.5	0.37106786227173627	0.3010299956639812
Chr1	4429884	4430360	Chr1_4429884_4430360_-	0.0	43.0	0	2.1666666666666665	2.5	0.4259687322722811	0.47712125471966244
Chr1	4430360	4434836	Chr1_4430360_4434836_+	4.0	38.0	0	5.021739130434782	4.0	0.742075884938364	0.6532125137753437
Chr1	4434836	4435312	Chr1_4434836_4435312_+	1.0	41.0	0	1.0	1.0	0.17609125905568124	0.17609125905568124
Chr1	4435312	4435677	Chr1_4435312_4435677_+	3.0	39.0	0	9.75	9.0	1.0107238653917732	0.9777236052888477
Chr1	4435581	4437265	Chr1_4435581_4437265_-	15.0	27.0	0	11.88888888888889	11.5	1.0930323579448546	1.0791812460476249
Chr1	4437389	4437516	Chr1_4437389_4437516_-	4.0	38.0	0	6.666666666666667	7.0	0.8553172051959429	0.8750612633917001
Chr1	4437516	4448657	Chr1_4437516_4448657_-	7.0	35.0	0	8.75	8.5	0.9661417327390326	0.9542425094393249
Chr1	4439168	4445993	Chr1_4439168_4445993_+	4.0	38.0	0	7.3768115942028984	6.0	0.896350457685058	0.8129133566428556
Chr1	4448657	4451819	Chr1_4448657_4451819_-	9.0	33.0	0	8.363636363636363	7.0	0.9476119305403118	0.8750612633917001
Chr1	4451867	4457851	Chr1_4451867_4457851_+	20.0	22.0	0	3.377049180327869	3.0	0.5885013100630634	0.5440680443502757
Chr1	4457851	4458327	Chr1_4457851_4458327_+	3.0	39.0	0	3.3333333333333335	1.5	0.5835765856339493	0.3010299956639812
Chr1	4458327	4460315	Chr1_4458327_4460315_-	12.0	30.0	0	7.428571428571429	5.0	0.8991949431084194	0.7403626894942439
Chr1	4460316	4461789	Chr1_4460316_4461789_-	10.0	32.0	0	17.4	16.0	1.252853030979893	1.2174839442139063
Chr1	4461626	4462505	Chr1_4461626_4462505_+	24.0	18.0	0	9.3	7.5	0.9912260756924949	0.9030899869919435
Chr1	4734942	4735211	Chr1_4734942_4735211_-	0.0	43.0	0	0.0	0.0	-0.3010299956639812	-0.3010299956639812
Chr1	4811325	4812003	Chr1_4811325_4812003_+	0.0	43.0	0	0.375	0.0	-0.057991946977686754	-0.3010299956639812
Chr1	4879515	4887037	Chr1_4879515_4887037_+	0.0	43.0	0	16.44736842105263	16.5	1.229102270743002	1.2304489213782739
Chr1	5376178	5377075	Chr1_5376178_5377075_+	0.0	43.0	0	0.0	0.0	-0.3010299956639812	-0.3010299956639812
Chr1	5525105	5525518	Chr1_5525105_5525518_-	0.0	43.0	0	0.0	0.0	-0.3010299956639812	-0.3010299956639812
Chr1	5532098	5533397	Chr1_5532098_5533397_-	0.0	43.0	0	17.785714285714285	18.0	1.2621119296336114	1.2671717284030137
Chr1	5558982	5559179	Chr1_5558982_5559179_-	0.0	43.0	0	0.0	0.0	-0.3010299956639812	-0.3010299956639812
Chr1	5593493	5600321	Chr1_5593493_5600321_-	2.0	40.0	0	11.771428571428572	13.0	1.0888951238169855	1.130333768495006
Chr1	5600651	5607526	Chr1_5600651_5607526_-	2.0	40.0	0	10.471428571428572	8.5	1.0402631800172553	0.9542425094393249
Chr1	5600925	5601105	Chr1_5600925_5601105_-	19.0	23.0	0	18.666666666666668	19.0	1.2825465899699682	1.290034611362518
Chr1	6065336	6065460	Chr1_6065336_6065460_-	0.0	43.0	0	0.0	0.0	-0.3010299956639812	-0.3010299956639812
Chr1	6083522	6083737	Chr1_6083522_6083737_-	1.0	41.0	0	1.0	1.0	0.17609125905568124	0.17609125905568124
Chr1	6162070	6162750	Chr1_6162070_6162750_+	0.0	43.0	0	0.0	0.0	-0.3010299956639812	-0.3010299956639812
Chr1	6311890	6312149	Chr1_6311890_6312149_-	0.0	43.0	0	0.5	0.5	0.0	0.0
Chr1	6312152	6312407	Chr1_6312152_6312407_-	0.0	43.0	0	0.0	0.0	-0.3010299956639812	-0.3010299956639812
Chr1	6348727	6348879	Chr1_6348727_6348879_-	0.0	43.0	0	0.0	0.0	-0.3010299956639812	-0.3010299956639812
Chr1	6503785	6503922	Chr1_6503785_6503922_+	0.0	43.0	0	3.6666666666666665	2.0	0.619788758288394	0.3979400086720376
Chr1	6504134	6504351	Chr1_6504134_6504351_-	9.0	33.0	0	3.6666666666666665	1.0	0.619788758288394	0.17609125905568124
Chr1	6923907	6924450	Chr1_6923907_6924450_+	2.0	40.0	0	23.666666666666668	28.0	1.3832167518513312	1.4548448600085102
Chr1	6924543	6924682	Chr1_6924543_6924682_-	28.0	14.0	0	14.5	14.5	1.1760912590556813	1.1760912590556813
Chr1	7044817	7044967	Chr1_7044817_7044967_-	0.0	43.0	0	0.0	0.0	-0.3010299956639812	-0.3010299956639812
Chr1	7061167	7061368	Chr1_7061167_7061368_-	0.0	43.0	0	0.0	0.0	-0.3010299956639812	-0.3010299956639812
Chr1	7061370	7061501	Chr1_7061370_7061501_+	0.0	43.0	0	0.0	0.0	-0.3010299956639812	-0.3010299956639812
Chr1	7094683	7099415	Chr1_7094683_7099415_-	0.0	43.0	0	22.346938775510203	23.0	1.3588280178865353	1.3710678622717363
Chr1	7099415	7099782	Chr1_7099415_7099782_+	28.0	14.0	0	23.5	26.0	1.380211241711606	1.423245873936808
Chr1	7099746	7100488	Chr1_7099746_7100488_-	13.0	29.0	0	19.5	17.5	1.3010299956639813	1.255272505103306
Chr1	7100543	7101845	Chr1_7100543_7101845_-	28.0	14.0	0	28.642857142857142	28.5	1.4645321274116418	1.462397997898956
Chr1	7101895	7102484	Chr1_7101895_7102484_-	27.0	15.0	0	26.571428571428573	27.0	1.4325111742898344	1.4393326938302626
Chr1	7102546	7105109	Chr1_7102546_7105109_-	33.0	9.0	0	30.11111111111111	33.0	1.485879093748479	1.5250448070368452
Chr1	7105712	7106896	Chr1_7105712_7106896_-	28.0	14.0	0	30.0	31.0	1.4842998393467859	1.4983105537896004
Chr1	7106895	7108902	Chr1_7106895_7108902_-	31.0	11.0	0	29.363636363636363	30.0	1.4751426887375745	1.4842998393467859
Chr1	7108876	7109228	Chr1_7108876_7109228_-	34.0	8.0	0	29.2	30.0	1.4727564493172123	1.4842998393467859
Chr1	7109300	7115709	Chr1_7109300_7115709_+	17.0	25.0	0	18.6	18.0	1.2810333672477277	1.2671717284030137
Chr1	7115709	7118481	Chr1_7115709_7118481_-	24.0	18.0	0	24.678571428571427	27.0	1.4010310856491794	1.4393326938302626
Chr1	7124995	7125254	Chr1_7124995_7125254_+	29.0	13.0	0	29.75	29.5	1.4807253789884878	1.4771212547196624
Chr1	7125430	7126007	Chr1_7125430_7126007_-	30.0	12.0	0	30.571428571428573	30.0	1.4923612212763993	1.4842998393467859
Chr1	7126091	7126724	Chr1_7126091_7126724_-	32.0	10.0	0	33.25	34.5	1.5282737771670438	1.5440680443502757
Chr1	7126724	7127243	Chr1_7126724_7127243_+	39.0	3.0	0	33.833333333333336	36.0	1.5357159699855099	1.5622928644564746
Chr1	7127261	7127964	Chr1_7127261_7127964_-	20.0	22.0	0	21.75	19.5	1.3473300153169503	1.3010299956639813
Chr1	7128003	7129306	Chr1_7128003_7129306_-	28.0	14.0	0	33.42857142857143	35.0	1.5305655739466286	1.550228353055094
Chr1	7129355	7129942	Chr1_7129355_7129942_-	35.0	7.0	0	37.714285714285715	38.0	1.5822257463429905	1.5854607295085006
Chr1	7130005	7132571	Chr1_7130005_7132571_-	35.0	7.0	0	31.115384615384617	32.0	1.4998984695692326	1.5118833609788744
Chr1	7133173	7136584	Chr1_7133173_7136584_-	35.0	7.0	0	32.371428571428574	33.0	1.5168185786543866	1.5250448070368452
Chr1	7136584	7137057	Chr1_7136584_7137057_+	13.0	29.0	0	5.666666666666667	5.5	0.7900504736833514	0.7781512503836436
Chr1	7137057	7143038	Chr1_7137057_7143038_+	0.0	43.0	0	3.3114754098360657	2.0	0.5810931222152057	0.3979400086720376
Chr1	7143038	7143520	Chr1_7143038_7143520_+	8.0	34.0	0	4.5	4.0	0.6989700043360189	0.6532125137753437
Chr1	7143612	7150336	Chr1_7143612_7150336_+	30.0	12.0	0	32.55882352941177	32.0	1.5192873941907872	1.5118833609788744
Chr1	7143704	7144336	Chr1_7143704_7144336_+	30.0	12.0	0	25.714285714285715	29.0	1.4185380285738514	1.469822015978163
Chr1	7147221	7149078	Chr1_7147221_7149078_+	32.0	10.0	0	32.10526315789474	32.0	1.5132877097592534	1.5118833609788744
Chr1	7150338	7151023	Chr1_7150338_7151023_-	28.0	14.0	0	28.375	28.5	1.4605219929002007	1.462397997898956
Chr1	7151080	7152367	Chr1_7151080_7152367_-	34.0	8.0	0	35.785714285714285	36.0	1.5597356766056811	1.5622928644564746
Chr1	7152429	7153011	Chr1_7152429_7153011_-	36.0	6.0	0	36.142857142857146	36.0	1.5639893294335783	1.5622928644564746
Chr1	7153080	7154199	Chr1_7153080_7154199_-	38.0	4.0	0	31.75	31.0	1.5085297189712865	1.4983105537896004
Chr1	7154192	7154734	Chr1_7154192_7154734_+	30.0	12.0	0	32.857142857142854	32.0	1.523188844887874	1.5118833609788744
Chr1	7154803	7155385	Chr1_7154803_7155385_+	38.0	4.0	0	35.0	35.0	1.550228353055094	1.550228353055094
Chr1	7155434	7155555	Chr1_7155434_7155555_+	32.0	10.0	0	29.5	29.5	1.4771212547196624	1.4771212547196624
Chr1	7155555	7161132	Chr1_7155555_7161132_+	27.0	15.0	0	34.14035087719298	36.0	1.5395822824000716	1.5622928644564746
Chr1	7161163	7168492	Chr1_7161163_7168492_-	23.0	19.0	0	30.91891891891892	32.0	1.4971912374949965	1.5118833609788744
Chr1	7162356	7162992	Chr1_7162356_7162992_-	15.0	27.0	0	17.142857142857142	15.0	1.2465689175814276	1.1903316981702914
Chr1	7168189	7168400	Chr1_7168189_7168400_+	35.0	7.0	0	28.666666666666668	27.0	1.4648867983026508	1.4393326938302626
Chr1	7168492	7175433	Chr1_7168492_7175433_-	27.0	15.0	0	26.859154929577464	27.0	1.4371026787538765	1.4393326938302626
Chr1	7175443	7180491	Chr1_7175443_7180491_-	10.0	32.0	0	30.058823529411764	31.0	1.4851366305149223	1.4983105537896004
Chr1	7180491	7181654	Chr1_7180491_7181654_-	36.0	6.0	0	34.15384615384615	34.0	1.539751443008245	1.5378190950732742
Chr1	7181654	7183195	Chr1_7181654_7183195_+	30.0	12.0	0	35.125	34.5	1.5517548730165667	1.5440680443502757
Chr1	7183195	7185456	Chr1_7183195_7185456_+	34.0	8.0	0	34.791666666666664	35.0	1.5476721686191008	1.550228353055094
Chr1	7185464	7185649	Chr1_7185464_7185649_-	31.0	11.0	0	32.333333333333336	33.0	1.5163149757779493	1.5250448070368452
Chr1	7186693	7186844	Chr1_7186693_7186844_+	33.0	9.0	0	33.0	33.0	1.5250448070368452	1.5250448070368452
Chr1	7187216	7187450	Chr1_7187216_7187450_+	34.0	8.0	0	33.666666666666664	34.0	1.5336026106721106	1.5378190950732742
Chr1	7189629	7189909	Chr1_7189629_7189909_-	33.0	9.0	0	33.0	33.0	1.5250448070368452	1.5250448070368452
Chr1	7190591	7193659	Chr1_7190591_7193659_-	32.0	10.0	0	33.96875	33.0	1.5374255341202847	1.5250448070368452
Chr1	7193672	7198068	Chr1_7193672_7198068_+	33.0	9.0	0	30.977777777777778	34.0	1.4980040650811124	1.5378190950732742
Chr1	7196349	7196987	Chr1_7196349_7196987_+	21.0	21.0	0	10.857142857142858	7.0	1.0552690886422136	0.8750612633917001
Chr1	7198031	7199153	Chr1_7198031_7199153_+	36.0	6.0	0	36.333333333333336	36.5	1.5662410233014672	1.568201724066995
Chr1	7199153	7201199	Chr1_7199153_7201199_+	32.0	10.0	0	32.142857142857146	32.0	1.5137881643916122	1.5118833609788744
Chr1	7201199	7208694	Chr1_7201199_7208694_+	32.0	10.0	0	29.5	30.5	1.4771212547196624	1.4913616938342726
Chr1	7208762	7210847	Chr1_7208762_7210847_+	31.0	11.0	0	34.22727272727273	34.0	1.5406706777534838	1.5378190950732742
Chr1	7210844	7211005	Chr1_7210844_7211005_+	31.0	11.0	0	30.333333333333332	31.0	1.48902047801937	1.4983105537896004
Chr1	7211136	7218854	Chr1_7211136_7218854_+	34.0	8.0	0	31.21794871794872	32.0	1.5013050926026215	1.5118833609788744
Chr1	7212263	7214120	Chr1_7212263_7214120_-	30.0	12.0	0	31.95	32.0	1.5112147011363881	1.5118833609788744
Chr1	7219489	7227696	Chr1_7219489_7227696_+	36.0	6.0	0	29.927710843373493	32.0	1.4832692804722944	1.5118833609788744
Chr1	7225223	7225860	Chr1_7225223_7225860_-	13.0	29.0	0	17.571428571428573	21.0	1.25699248549758	1.3324384599156054
Chr1	7227696	7234563	Chr1_7227696_7234563_-	32.0	10.0	0	20.214285714285715	16.0	1.3162699622207181	1.2174839442139063
Chr1	7234744	7235381	Chr1_7234744_7235381_+	28.0	14.0	0	21.142857142857142	27.0	1.335314592824067	1.4393326938302626
Chr1	7235419	7240515	Chr1_7235419_7240515_-	23.0	19.0	0	22.865384615384617	23.0	1.3685729342995319	1.3710678622717363
Chr1	7239335	7240102	Chr1_7239335_7240102_+	20.0	22.0	0	22.77777777777778	23.0	1.3669415178629893	1.3710678622717363
Chr1	7240515	7241150	Chr1_7240515_7241150_+	12.0	30.0	0	15.714285714285714	12.0	1.2098978215148848	1.0969100130080565
Chr1	7241233	7241429	Chr1_7241233_7241429_-	27.0	15.0	0	28.666666666666668	28.0	1.4648867983026508	1.4548448600085102
Chr1	7241512	7242069	Chr1_7241512_7242069_-	28.0	14.0	0	25.666666666666668	26.0	1.4177484020255902	1.423245873936808
Chr1	7242069	7248998	Chr1_7242069_7248998_+	24.0	18.0	0	19.514285714285716	18.0	1.3013400952715177	1.2671717284030137
Chr1	7248995	7254186	Chr1_7248995_7254186_+	18.0	24.0	0	28.60377358490566	32.0	1.4639493031044903	1.5118833609788744
Chr1	7254182	7255206	Chr1_7254182_7255206_-	24.0	18.0	0	26.416666666666668	29.0	1.430021276283478	1.469822015978163
Chr1	7254775	7255618	Chr1_7254775_7255618_+	29.0	13.0	0	24.2	28.0	1.3926969532596658	1.4548448600085102
Chr1	7334489	7334700	Chr1_7334489_7334700_-	0.0	43.0	0	0.0	0.0	-0.3010299956639812	-0.3010299956639812
Chr1	7371901	7372226	Chr1_7371901_7372226_-	0.0	43.0	0	0.0	0.0	-0.3010299956639812	-0.3010299956639812
Chr1	7412147	7412342	Chr1_7412147_7412342_-	0.0	43.0	0	0.0	0.0	-0.3010299956639812	-0.3010299956639812
Chr1	7508356	7508560	Chr1_7508356_7508560_+	5.0	37.0	1	19.333333333333332	25.0	1.2973957110088872	1.4065401804339552
Chr1	7508771	7508883	Chr1_7508771_7508883_+	17.0	25.0	1	16.0	16.0	1.2174839442139063	1.2174839442139063
Chr1	7508942	7510144	Chr1_7508942_7510144_+	27.0	15.0	1	15.461538461538462	15.0	1.2030747487412747	1.1903316981702914
Chr1	7510144	7510620	Chr1_7510144_7510620_+	9.0	33.0	0	13.833333333333334	13.5	1.156347200859924	1.146128035678238
Chr1	7510620	7516603	Chr1_7510620_7516603_+	16.0	26.0	0	18.39344262295082	18.0	1.2763110990509188	1.2671717284030137
Chr1	7516603	7517079	Chr1_7516603_7517079_+	18.0	24.0	0	15.0	17.0	1.1903316981702914	1.2430380486862944
Chr1	7517079	7522722	Chr1_7517079_7522722_+	11.0	31.0	0	15.948275862068966	15.0	1.2161203811411578	1.1903316981702914
Chr1	7522722	7522907	Chr1_7522722_7522907_+	13.0	29.0	0	17.666666666666668	15.0	1.25927524755698	1.1903316981702914
Chr1	7523011	7527149	Chr1_7523011_7527149_+	11.0	31.0	0	17.976190476190474	17.0	1.266612430860288	1.2430380486862944
Chr1	7569445	7569697	Chr1_7569445_7569697_-	0.0	43.0	0	0.0	0.0	-0.3010299956639812	-0.3010299956639812
Chr1	7594685	7594857	Chr1_7594685_7594857_-	0.0	43.0	0	0.0	0.0	-0.3010299956639812	-0.3010299956639812
Chr1	7630445	7630611	Chr1_7630445_7630611_+	0.0	43.0	0	0.0	0.0	-0.3010299956639812	-0.3010299956639812
Chr1	7648945	7649460	Chr1_7648945_7649460_-	0.0	43.0	0	0.0	0.0	-0.3010299956639812	-0.3010299956639812
Chr1	7650636	7650761	Chr1_7650636_7650761_-	0.0	43.0	1	0.0	0.0	-0.3010299956639812	-0.3010299956639812
Chr1	7669428	7669629	Chr1_7669428_7669629_-	0.0	43.0	0	0.0	0.0	-0.3010299956639812	-0.3010299956639812
Chr1	7682373	7682801	Chr1_7682373_7682801_-	0.0	43.0	0	0.0	0.0	-0.3010299956639812	-0.3010299956639812
Chr1	7682805	7682984	Chr1_7682805_7682984_+	0.0	43.0	0	0.0	0.0	-0.3010299956639812	-0.3010299956639812
Chr1	7712182	7712303	Chr1_7712182_7712303_-	0.0	43.0	1	0.0	0.0	-0.3010299956639812	-0.3010299956639812
Chr1	7712826	7713504	Chr1_7712826_7713504_-	0.0	43.0	1	0.0	0.0	-0.3010299956639812	-0.3010299956639812
Chr1	7714159	7714339	Chr1_7714159_7714339_-	0.0	43.0	1	0.0	0.0	-0.3010299956639812	-0.3010299956639812
Chr1	7723081	7723480	Chr1_7723081_7723480_+	0.0	43.0	0	0.0	0.0	-0.3010299956639812	-0.3010299956639812
Chr1	7726622	7726772	Chr1_7726622_7726772_+	0.0	43.0	0	3.0	3.0	0.5440680443502757	0.5440680443502757
Chr1	7726874	7731761	Chr1_7726874_7731761_+	8.0	34.0	0	13.4	15.0	1.1430148002540952	1.1903316981702914
Chr1	7767057	7767300	Chr1_7767057_7767300_+	0.0	43.0	0	0.0	0.0	-0.3010299956639812	-0.3010299956639812
Chr1	7805208	7805390	Chr1_7805208_7805390_+	0.0	43.0	0	0.0	0.0	-0.3010299956639812	-0.3010299956639812
Chr1	7813185	7819058	Chr1_7813185_7819058_+	0.0	43.0	0	15.866666666666667	16.0	1.213960237403306	1.2174839442139063
Chr1	7861883	7862149	Chr1_7861883_7862149_-	0.0	43.0	0	0.0	0.0	-0.3010299956639812	-0.3010299956639812
Chr1	8155926	8156027	Chr1_8155926_8156027_+	0.0	43.0	0	0.0	0.0	-0.3010299956639812	-0.3010299956639812
Chr1	8185849	8186145	Chr1_8185849_8186145_+	0.0	43.0	0	0.0	0.0	-0.3010299956639812	-0.3010299956639812
Chr1	8187807	8187915	Chr1_8187807_8187915_+	0.0	43.0	0	0.0	0.0	-0.3010299956639812	-0.3010299956639812
Chr1	8194091	8194814	Chr1_8194091_8194814_+	0.0	43.0	0	1.4444444444444444	1.0	0.28879553924696955	0.17609125905568124
Chr1	8298983	8299104	Chr1_8298983_8299104_+	0.0	43.0	0	0.0	0.0	-0.3010299956639812	-0.3010299956639812
Chr1	8299279	8299489	Chr1_8299279_8299489_-	0.0	43.0	0	0.0	0.0	-0.3010299956639812	-0.3010299956639812
Chr1	8302551	8302665	Chr1_8302551_8302665_-	0.0	43.0	0	0.0	0.0	-0.3010299956639812	-0.3010299956639812
Chr1	8308881	8309126	Chr1_8308881_8309126_+	0.0	43.0	0	0.0	0.0	-0.3010299956639812	-0.3010299956639812
Chr1	8352301	8352422	Chr1_8352301_8352422_-	0.0	43.0	0	8.0	8.0	0.9294189257142927	0.9294189257142927
Chr1	8352767	8352889	Chr1_8352767_8352889_-	12.0	30.0	0	6.0	6.0	0.8129133566428556	0.8129133566428556
Chr1	8534101	8534254	Chr1_8534101_8534254_+	0.0	43.0	0	0.0	0.0	-0.3010299956639812	-0.3010299956639812
Chr1	8541776	8541917	Chr1_8541776_8541917_+	0.0	43.0	0	0.3333333333333333	0.0	-0.07918124604762487	-0.3010299956639812
Chr1	8542166	8542300	Chr1_8542166_8542300_-	1.0	41.0	0	0.5	0.5	0.0	0.0
Chr1	8551334	8551468	Chr1_8551334_8551468_+	0.0	43.0	0	0.0	0.0	-0.3010299956639812	-0.3010299956639812
Chr1	8651253	8651380	Chr1_8651253_8651380_+	0.0	43.0	0	0.0	0.0	-0.3010299956639812	-0.3010299956639812
Chr1	8684847	8685036	Chr1_8684847_8685036_+	0.0	43.0	1	0.3333333333333333	0.0	-0.07918124604762487	-0.3010299956639812
Chr1	8712294	8712627	Chr1_8712294_8712627_-	12.0	30.0	0	3.6	2.0	0.6127838567197355	0.3979400086720376
Chr1	8743809	8744087	Chr1_8743809_8744087_-	0.0	43.0	1	0.3333333333333333	0.0	-0.07918124604762487	-0.3010299956639812
Chr1	8744108	8744240	Chr1_8744108_8744240_+	1.0	41.0	1	0.5	0.5	0.0	0.0
Chr1	8744738	8744866	Chr1_8744738_8744866_+	0.0	43.0	1	0.0	0.0	-0.3010299956639812	-0.3010299956639812
Chr1	8745417	8745600	Chr1_8745417_8745600_+	0.0	43.0	1	0.0	0.0	-0.3010299956639812	-0.3010299956639812
Chr1	8755699	8755915	Chr1_8755699_8755915_-	0.0	43.0	0	0.0	0.0	-0.3010299956639812	-0.3010299956639812
Chr1	8756888	8757068	Chr1_8756888_8757068_-	0.0	43.0	0	0.0	0.0	-0.3010299956639812	-0.3010299956639812
Chr1	8783746	8783927	Chr1_8783746_8783927_+	0.0	43.0	0	0.0	0.0	-0.3010299956639812	-0.3010299956639812
Chr1	8784437	8784605	Chr1_8784437_8784605_-	0.0	43.0	0	0.0	0.0	-0.3010299956639812	-0.3010299956639812
Chr1	8784607	8784789	Chr1_8784607_8784789_+	0.0	43.0	0	0.0	0.0	-0.3010299956639812	-0.3010299956639812
Chr1	8809894	8810095	Chr1_8809894_8810095_-	0.0	43.0	0	0.0	0.0	-0.3010299956639812	-0.3010299956639812
Chr1	8828176	8828308	Chr1_8828176_8828308_-	0.0	43.0	0	11.0	16.0	1.0606978403536116	1.2174839442139063
Chr1	8832541	8838414	Chr1_8832541_8838414_+	0.0	43.0	0	15.766666666666667	16.0	1.211298567283048	1.2174839442139063
Chr1	8887534	8887715	Chr1_8887534_8887715_+	0.0	43.0	0	0.0	0.0	-0.3010299956639812	-0.3010299956639812
Chr1	8894403	8894603	Chr1_8894403_8894603_-	0.0	43.0	0	0.0	0.0	-0.3010299956639812	-0.3010299956639812
Chr1	8909721	8909884	Chr1_8909721_8909884_-	0.0	43.0	0	0.0	0.0	-0.3010299956639812	-0.3010299956639812
Chr1	8991118	8991309	Chr1_8991118_8991309_-	1.0	41.0	1	0.6666666666666666	1.0	0.06694678963061314	0.17609125905568124
Chr1	8997285	8997499	Chr1_8997285_8997499_-	0.0	43.0	1	0.0	0.0	-0.3010299956639812	-0.3010299956639812
Chr1	9115986	9116171	Chr1_9115986_9116171_-	0.0	43.0	0	0.0	0.0	-0.3010299956639812	-0.3010299956639812
Chr1	9137723	9137879	Chr1_9137723_9137879_-	0.0	43.0	0	0.0	0.0	-0.3010299956639812	-0.3010299956639812
Chr1	9187245	9187406	Chr1_9187245_9187406_+	0.0	43.0	0	1.3333333333333333	2.0	0.2632414347745814	0.3979400086720376
Chr1	9187505	9190202	Chr1_9187505_9190202_+	5.0	37.0	0	18.178571428571427	17.0	1.271343657525055	1.2430380486862944
Chr1	9190202	9190696	Chr1_9190202_9190696_-	12.0	30.0	0	15.4	17.0	1.2013971243204515	1.2430380486862944
Chr1	9190696	9196679	Chr1_9190696_9196679_-	17.0	25.0	0	19.24590163934426	19.0	1.295476969323595	1.290034611362518
Chr1	9196679	9197155	Chr1_9196679_9197155_-	16.0	26.0	0	12.666666666666666	13.0	1.1194758409067977	1.130333768495006
Chr1	9197155	9199333	Chr1_9197155_9199333_+	4.0	38.0	0	15.217391304347826	15.0	1.1963804656129569	1.1903316981702914
Chr1	9214094	9214421	Chr1_9214094_9214421_+	0.0	43.0	0	0.0	0.0	-0.3010299956639812	-0.3010299956639812
Chr1	9221495	9221746	Chr1_9221495_9221746_+	0.0	43.0	0	0.0	0.0	-0.3010299956639812	-0.3010299956639812
Chr1	9255072	9255244	Chr1_9255072_9255244_-	2.0	40.0	1	2.0	2.0	0.3979400086720376	0.3979400086720376
Chr1	9261057	9261323	Chr1_9261057_9261323_-	0.0	43.0	1	0.0	0.0	-0.3010299956639812	-0.3010299956639812
Chr1	9262526	9262651	Chr1_9262526_9262651_-	0.0	43.0	1	0.0	0.0	-0.3010299956639812	-0.3010299956639812
Chr1	9274983	9275110	Chr1_9274983_9275110_+	6.0	36.0	0	7.666666666666667	7.0	0.9120448296448701	0.8750612633917001
Chr1	9275088	9275343	Chr1_9275088_9275343_-	7.0	35.0	0	8.75	8.5	0.9661417327390326	0.9542425094393249
Chr2	73	1490	Chr2_73_1490_-	41.0	2.0	1	31.266666666666666	33.0	1.501971645918664	1.5250448070368452
Chr2	5888	5990	Chr2_5888_5990_-	0.0	43.0	1	0.0	0.0	-0.3010299956639812	-0.3010299956639812
Chr2	118811	119428	Chr2_118811_119428_-	0.0	43.0	1	0.0	0.0	-0.3010299956639812	-0.3010299956639812
Chr2	172727	172937	Chr2_172727_172937_-	0.0	43.0	0	0.0	0.0	-0.3010299956639812	-0.3010299956639812
Chr2	204933	205073	Chr2_204933_205073_+	1.0	41.0	0	1.0	1.0	0.17609125905568124	0.17609125905568124
Chr2	220420	220629	Chr2_220420_220629_+	1.0	41.0	0	1.0	1.0	0.17609125905568124	0.17609125905568124
Chr2	231292	231469	Chr2_231292_231469_+	1.0	41.0	0	1.0	1.0	0.17609125905568124	0.17609125905568124
Chr2	231696	231896	Chr2_231696_231896_+	1.0	41.0	0	1.0	1.0	0.17609125905568124	0.17609125905568124
Chr2	233099	233288	Chr2_233099_233288_-	0.0	43.0	0	0.0	0.0	-0.3010299956639812	-0.3010299956639812
Chr2	243361	243578	Chr2_243361_243578_+	0.0	43.0	0	0.0	0.0	-0.3010299956639812	-0.3010299956639812
Chr2	263126	263334	Chr2_263126_263334_+	0.0	43.0	0	0.0	0.0	-0.3010299956639812	-0.3010299956639812
Chr2	306002	306209	Chr2_306002_306209_-	0.0	43.0	0	0.0	0.0	-0.3010299956639812	-0.3010299956639812
Chr2	306884	307075	Chr2_306884_307075_-	0.0	43.0	0	0.0	0.0	-0.3010299956639812	-0.3010299956639812
Chr2	307872	308133	Chr2_307872_308133_-	0.0	43.0	0	0.0	0.0	-0.3010299956639812	-0.3010299956639812
Chr2	330400	330721	Chr2_330400_330721_+	0.0	43.0	0	0.0	0.0	-0.3010299956639812	-0.3010299956639812
Chr2	343556	343799	Chr2_343556_343799_-	0.0	43.0	0	0.0	0.0	-0.3010299956639812	-0.3010299956639812
Chr2	348926	349028	Chr2_348926_349028_-	0.0	43.0	0	1.5	1.5	0.3010299956639812	0.3010299956639812
Chr2	349035	349836	Chr2_349035_349836_-	3.0	39.0	0	15.11111111111111	17.0	1.1934338148017738	1.2430380486862944
Chr2	349836	352419	Chr2_349836_352419_+	17.0	25.0	0	10.814814814814815	12.0	1.0536474504195856	1.0969100130080565
Chr2	352419	353243	Chr2_352419_353243_-	13.0	29.0	0	9.222222222222221	9.0	0.9877655435829883	0.9777236052888477
Chr2	353357	353554	Chr2_353357_353554_-	13.0	29.0	0	12.666666666666666	13.0	1.1194758409067977	1.130333768495006
Chr2	353554	357613	Chr2_353554_357613_-	12.0	30.0	0	10.023809523809524	11.0	1.0221729789511915	1.0606978403536116
Chr2	357613	364560	Chr2_357613_364560_+	7.0	35.0	0	16.84285714285714	16.0	1.239120646724982	1.2174839442139063
Chr2	364560	366727	Chr2_364560_366727_-	14.0	28.0	0	15.0	16.0	1.1903316981702914	1.2174839442139063
Chr2	366727	367358	Chr2_366727_367358_-	16.0	26.0	0	16.0	16.0	1.2174839442139063	1.2174839442139063
Chr2	367569	367771	Chr2_367569_367771_-	16.0	26.0	0	11.0	16.0	1.0606978403536116	1.2174839442139063
Chr2	367767	367908	Chr2_367767_367908_-	1.0	41.0	0	0.3333333333333333	0.0	-0.07918124604762487	-0.3010299956639812
Chr2	368260	368420	Chr2_368260_368420_+	0.0	43.0	0	0.0	0.0	-0.3010299956639812	-0.3010299956639812
Chr2	378369	378731	Chr2_378369_378731_-	0.0	43.0	0	0.4	0.0	-0.045757490560675115	-0.3010299956639812
Chr2	380085	380334	Chr2_380085_380334_-	0.0	43.0	0	0.0	0.0	-0.3010299956639812	-0.3010299956639812
Chr2	403625	403829	Chr2_403625_403829_-	0.0	43.0	0	0.3333333333333333	0.0	-0.07918124604762487	-0.3010299956639812
Chr2	499758	499908	Chr2_499758_499908_+	0.0	43.0	0	2.0	3.0	0.3979400086720376	0.5440680443502757
Chr2	499907	500218	Chr2_499907_500218_+	3.0	39.0	0	2.0	2.0	0.3979400086720376	0.3979400086720376
Chr2	500215	500367	Chr2_500215_500367_+	2.0	40.0	0	3.0	3.0	0.5440680443502757	0.5440680443502757
Chr2	500498	500822	Chr2_500498_500822_+	12.0	30.0	0	17.2	18.0	1.2479732663618066	1.2671717284030137
Chr2	500822	507702	Chr2_500822_507702_-	18.0	24.0	0	23.014285714285716	26.0	1.3713317908619942	1.423245873936808
Chr2	507701	513666	Chr2_507701_513666_-	31.0	11.0	0	22.9	23.0	1.3692158574101427	1.3710678622717363
Chr2	513666	520533	Chr2_513666_520533_-	29.0	13.0	0	23.32857142857143	25.5	1.3770980062874631	1.414973347970818
Chr2	520533	521184	Chr2_520533_521184_+	25.0	17.0	0	24.571428571428573	25.0	1.3991790807875861	1.4065401804339552
Chr2	521185	530985	Chr2_521185_530985_+	20.0	22.0	0	18.09090909090909	19.0	1.2693006271851355	1.290034611362518
Chr2	530986	531126	Chr2_530986_531126_+	17.0	25.0	0	17.0	17.0	1.2430380486862944	1.2430380486862944
Chr2	531228	532108	Chr2_531228_532108_+	19.0	23.0	0	21.1	21.0	1.334453751150931	1.3324384599156054
Chr2	532108	540994	Chr2_532108_540994_-	19.0	23.0	0	23.49438202247191	25.0	1.3801095691179301	1.4065401804339552
Chr2	532442	538348	Chr2_532442_538348_+	12.0	30.0	0	22.383333333333333	25.0	1.3595192868531114	1.4065401804339552
Chr2	540994	548565	Chr2_540994_548565_+	11.0	31.0	0	20.83116883116883	21.0	1.3290146530593365	1.3324384599156054
Chr2	548565	551482	Chr2_548565_551482_+	18.0	24.0	0	24.933333333333334	23.5	1.4054032832352181	1.380211241711606
Chr2	551482	555240	Chr2_551482_555240_-	16.0	26.0	0	29.128205128205128	32.0	1.4717053427886289	1.5118833609788744
Chr2	555240	562807	Chr2_555240_562807_-	28.0	14.0	0	20.363636363636363	20.0	1.319390004715055	1.3117538610557542
Chr2	562807	563552	Chr2_562807_563552_-	25.0	17.0	0	25.0	25.5	1.4065401804339552	1.414973347970818
Chr2	563552	571170	Chr2_563552_571170_-	16.0	26.0	0	14.883116883116884	15.0	1.187044339886302	1.1903316981702914
Chr2	571170	571432	Chr2_571170_571432_+	8.0	34.0	0	16.5	19.0	1.2304489213782739	1.290034611362518
Chr2	571432	582124	Chr2_571432_582124_-	18.0	24.0	0	22.925925925925927	23.0	1.3696967656888683	1.3710678622717363
Chr2	572588	580158	Chr2_572588_580158_+	27.0	15.0	0	22.506493506493506	23.0	1.3618504314967141	1.3710678622717363
Chr2	582171	586580	Chr2_582171_586580_-	23.0	19.0	0	23.177777777777777	22.0	1.3743409402748772	1.3521825181113625
Chr2	586580	588370	Chr2_586580_588370_+	18.0	24.0	0	18.263157894736842	18.0	1.2733059332350554	1.2671717284030137
Chr2	588370	595939	Chr2_588370_595939_+	17.0	25.0	0	23.428571428571427	23.0	1.3789167713586072	1.3710678622717363
Chr2	595939	596986	Chr2_595939_596986_+	6.0	36.0	0	22.545454545454547	24.0	1.3625852785111299	1.3891660843645324
Chr2	597000	603601	Chr2_597000_603601_-	22.0	20.0	0	25.65671641791045	25.0	1.4175832239378698	1.4065401804339552
Chr2	599336	599533	Chr2_599336_599533_+	19.0	23.0	0	20.333333333333332	21.0	1.3187587626244128	1.3324384599156054
Chr2	603601	606705	Chr2_603601_606705_-	19.0	23.0	0	20.625	21.5	1.32479671762173	1.3424226808222062
Chr2	606705	619584	Chr2_606705_619584_+	23.0	19.0	0	20.488372093023255	21.0	1.321978754998109	1.3324384599156054
Chr2	606965	607117	Chr2_606965_607117_+	19.0	23.0	0	16.666666666666668	18.0	1.2346859743215286	1.2671717284030137
Chr2	607216	612105	Chr2_607216_612105_+	11.0	31.0	0	13.62	14.0	1.1498346967157849	1.1613680022349748
Chr2	614783	614938	Chr2_614783_614938_-	29.0	13.0	0	25.666666666666668	27.0	1.4177484020255902	1.4393326938302626
Chr2	619646	624035	Chr2_619646_624035_-	23.0	19.0	0	27.155555555555555	27.0	1.4417823871692683	1.4393326938302626
Chr2	624036	627984	Chr2_624036_627984_+	26.0	16.0	0	27.675	29.0	1.4498639247181442	1.469822015978163
Chr2	627984	629519	Chr2_627984_629519_-	11.0	31.0	0	34.23529411764706	37.0	1.5407709805712597	1.5740312677277188
Chr2	629521	631300	Chr2_629521_631300_+	33.0	9.0	0	19.61111111111111	19.0	1.3034360654298596	1.290034611362518
Chr2	631300	639027	Chr2_631300_639027_+	23.0	19.0	0	33.217948717948715	34.0	1.5278611457992775	1.5378190950732742
Chr2	632281	632427	Chr2_632281_632427_-	33.0	9.0	0	32.0	33.0	1.5118833609788744	1.5250448070368452
Chr2	639027	640384	Chr2_639027_640384_+	21.0	21.0	0	28.428571428571427	30.0	1.4613269875364305	1.4842998393467859
Chr2	640384	641022	Chr2_640384_641022_+	33.0	9.0	0	15.75	14.0	1.2108533653148932	1.1613680022349748
Chr2	641059	643058	Chr2_641059_643058_-	14.0	28.0	0	12.476190476190476	14.0	1.113147211878742	1.1613680022349748
Chr2	643058	650451	Chr2_643058_650451_+	18.0	24.0	0	26.92	26.0	1.4380674504534938	1.423245873936808
Chr2	650451	663239	Chr2_650451_663239_+	15.0	27.0	0	20.48062015503876	21.0	1.3218183211278312	1.3324384599156054
Chr2	654062	661792	Chr2_654062_661792_-	8.0	34.0	0	21.025641025641026	21.0	1.3329560934475684	1.3324384599156054
Chr2	658711	658863	Chr2_658711_658863_-	14.0	28.0	0	13.0	13.0	1.130333768495006	1.130333768495006
Chr2	663240	665097	Chr2_663240_665097_+	29.0	13.0	0	31.894736842105264	32.0	1.510474456314506	1.5118833609788744
Chr2	665099	667226	Chr2_665099_667226_+	33.0	9.0	0	24.608695652173914	24.0	1.399824152546589	1.3891660843645324
Chr2	667226	667806	Chr2_667226_667806_+	3.0	39.0	0	11.857142857142858	12.0	1.0919180674505573	1.0969100130080565
Chr2	667901	670870	Chr2_667901_670870_-	11.0	31.0	0	18.666666666666668	20.5	1.2825465899699682	1.3222192947339193
Chr2	669683	670458	Chr2_669683_670458_+	26.0	16.0	0	23.0	23.0	1.3710678622717363	1.3710678622717363
Chr2	670870	671506	Chr2_670870_671506_+	19.0	23.0	0	11.75	12.5	1.0881360887005513	1.1139433523068367
Chr2	671589	671998	Chr2_671589_671998_+	8.0	34.0	0	4.6	4.0	0.7075701760979364	0.6532125137753437
Chr2	678524	678739	Chr2_678524_678739_-	0.0	43.0	0	0.0	0.0	-0.3010299956639812	-0.3010299956639812
Chr2	694216	694456	Chr2_694216_694456_+	0.0	43.0	0	0.0	0.0	-0.3010299956639812	-0.3010299956639812
Chr2	826989	827224	Chr2_826989_827224_-	0.0	43.0	0	0.0	0.0	-0.3010299956639812	-0.3010299956639812
Chr2	907953	908137	Chr2_907953_908137_-	0.0	43.0	0	0.0	0.0	-0.3010299956639812	-0.3010299956639812
Chr2	973009	973176	Chr2_973009_973176_+	0.0	43.0	0	0.0	0.0	-0.3010299956639812	-0.3010299956639812
Chr2	975596	975764	Chr2_975596_975764_+	0.0	43.0	0	0.0	0.0	-0.3010299956639812	-0.3010299956639812
Chr2	990336	990468	Chr2_990336_990468_-	0.0	43.0	0	0.0	0.0	-0.3010299956639812	-0.3010299956639812
Chr2	1001759	1001954	Chr2_1001759_1001954_+	0.0	43.0	0	0.0	0.0	-0.3010299956639812	-0.3010299956639812
Chr2	1002017	1002223	Chr2_1002017_1002223_-	0.0	43.0	0	0.0	0.0	-0.3010299956639812	-0.3010299956639812
Chr2	1034959	1035469	Chr2_1034959_1035469_-	0.0	43.0	0	0.0	0.0	-0.3010299956639812	-0.3010299956639812
Chr2	1035083	1035381	Chr2_1035083_1035381_+	0.0	43.0	0	0.0	0.0	-0.3010299956639812	-0.3010299956639812
Chr2	1048248	1048516	Chr2_1048248_1048516_-	1.0	41.0	0	3.5	2.0	0.6020599913279624	0.3979400086720376
Chr2	1069539	1071396	Chr2_1069539_1071396_-	1.0	41.0	0	29.42105263157895	32.0	1.4759768680709247	1.5118833609788744
Chr2	1086055	1086241	Chr2_1086055_1086241_-	0.0	43.0	0	0.0	0.0	-0.3010299956639812	-0.3010299956639812
Chr2	1133583	1133789	Chr2_1133583_1133789_+	0.0	43.0	0	0.0	0.0	-0.3010299956639812	-0.3010299956639812
Chr2	1138715	1138973	Chr2_1138715_1138973_-	0.0	43.0	0	0.0	0.0	-0.3010299956639812	-0.3010299956639812
Chr2	1145156	1145356	Chr2_1145156_1145356_+	0.0	43.0	0	0.0	0.0	-0.3010299956639812	-0.3010299956639812
Chr2	1246994	1247436	Chr2_1246994_1247436_+	0.0	43.0	0	0.0	0.0	-0.3010299956639812	-0.3010299956639812
Chr2	1321378	1321521	Chr2_1321378_1321521_+	0.0	43.0	1	0.0	0.0	-0.3010299956639812	-0.3010299956639812
Chr2	1326231	1326359	Chr2_1326231_1326359_+	0.0	43.0	1	0.0	0.0	-0.3010299956639812	-0.3010299956639812
Chr2	1330674	1331361	Chr2_1330674_1331361_-	20.0	22.0	0	10.25	7.5	1.0314084642516241	0.9030899869919435
Chr2	1347177	1347300	Chr2_1347177_1347300_-	0.0	43.0	0	0.0	0.0	-0.3010299956639812	-0.3010299956639812
Chr2	1366733	1366933	Chr2_1366733_1366933_+	0.0	43.0	0	0.0	0.0	-0.3010299956639812	-0.3010299956639812
Chr2	1381663	1381813	Chr2_1381663_1381813_+	0.0	43.0	0	0.0	0.0	-0.3010299956639812	-0.3010299956639812
Chr2	1394947	1400474	Chr2_1394947_1400474_+	4.0	38.0	0	27.571428571428573	28.0	1.4482645146971886	1.4548448600085102
Chr2	1428579	1428711	Chr2_1428579_1428711_+	23.0	19.0	1	15.333333333333334	23.0	1.1995723549052042	1.3710678622717363
Chr2	1435434	1435901	Chr2_1435434_1435901_-	0.0	43.0	0	0.5	0.5	0.0	0.0
Chr2	1480631	1480950	Chr2_1480631_1480950_+	2.0	40.0	0	0.5	0.0	0.0	-0.3010299956639812
Chr2	1481008	1481232	Chr2_1481008_1481232_+	0.0	43.0	0	0.0	0.0	-0.3010299956639812	-0.3010299956639812
Chr2	1481679	1481991	Chr2_1481679_1481991_+	39.0	3.0	0	31.75	30.0	1.5085297189712865	1.4842998393467859
Chr2	1483444	1483576	Chr2_1483444_1483576_-	15.0	27.0	0	7.5	7.5	0.9030899869919435	0.9030899869919435
Chr2	1489343	1495216	Chr2_1489343_1495216_+	1.0	41.0	0	16.016666666666666	16.0	1.2179224041016317	1.2174839442139063
Chr2	1565475	1567337	Chr2_1565475_1567337_+	0.0	43.0	0	28.85	32.0	1.4676081055836332	1.5118833609788744
Chr2	1574888	1575006	Chr2_1574888_1575006_-	0.0	43.0	0	0.0	0.0	-0.3010299956639812	-0.3010299956639812
Chr2	1708399	1708516	Chr2_1708399_1708516_-	0.0	43.0	0	0.6666666666666666	0.0	0.06694678963061314	-0.3010299956639812
Chr2	1897645	1897886	Chr2_1897645_1897886_-	0.0	43.0	0	0.0	0.0	-0.3010299956639812	-0.3010299956639812
Chr2	2140530	2140669	Chr2_2140530_2140669_+	0.0	43.0	0	0.0	0.0	-0.3010299956639812	-0.3010299956639812
Chr2	2140940	2141068	Chr2_2140940_2141068_+	0.0	43.0	0	0.0	0.0	-0.3010299956639812	-0.3010299956639812
Chr2	2192724	2192945	Chr2_2192724_2192945_-	0.0	43.0	1	0.0	0.0	-0.3010299956639812	-0.3010299956639812
Chr2	2208190	2208986	Chr2_2208190_2208986_-	0.0	43.0	0	0.0	0.0	-0.3010299956639812	-0.3010299956639812
Chr2	2209130	2209882	Chr2_2209130_2209882_-	0.0	43.0	0	0.0	0.0	-0.3010299956639812	-0.3010299956639812
Chr2	2293579	2293699	Chr2_2293579_2293699_+	0.0	43.0	0	0.0	0.0	-0.3010299956639812	-0.3010299956639812
Chr2	2331434	2331616	Chr2_2331434_2331616_-	0.0	43.0	0	0.0	0.0	-0.3010299956639812	-0.3010299956639812
Chr2	2331837	2332061	Chr2_2331837_2332061_+	0.0	43.0	0	0.0	0.0	-0.3010299956639812	-0.3010299956639812
Chr2	2348548	2348732	Chr2_2348548_2348732_+	0.0	43.0	0	0.0	0.0	-0.3010299956639812	-0.3010299956639812
Chr2	2375717	2376039	Chr2_2375717_2376039_+	0.0	43.0	0	0.0	0.0	-0.3010299956639812	-0.3010299956639812
Chr2	2376029	2376347	Chr2_2376029_2376347_-	0.0	43.0	0	0.0	0.0	-0.3010299956639812	-0.3010299956639812
Chr2	2448133	2448388	Chr2_2448133_2448388_+	0.0	43.0	0	0.0	0.0	-0.3010299956639812	-0.3010299956639812
Chr2	2540843	2541044	Chr2_2540843_2541044_+	0.0	43.0	0	0.0	0.0	-0.3010299956639812	-0.3010299956639812
Chr2	2551447	2551638	Chr2_2551447_2551638_-	0.0	43.0	0	0.0	0.0	-0.3010299956639812	-0.3010299956639812
Chr2	2552076	2552224	Chr2_2552076_2552224_-	0.0	43.0	0	0.0	0.0	-0.3010299956639812	-0.3010299956639812
Chr2	2559882	2560073	Chr2_2559882_2560073_-	0.0	43.0	0	0.0	0.0	-0.3010299956639812	-0.3010299956639812
Chr2	2668284	2668925	Chr2_2668284_2668925_+	0.0	43.0	0	4.0	4.0	0.6532125137753437	0.6532125137753437
Chr2	2669005	2670035	Chr2_2669005_2670035_-	25.0	17.0	0	11.272727272727273	11.0	1.0708770832590455	1.0606978403536116
Chr2	2670039	2674282	Chr2_2670039_2674282_-	11.0	31.0	0	22.511627906976745	22.0	1.3619473429628286	1.3521825181113625
Chr2	2674282	2681152	Chr2_2674282_2681152_+	29.0	13.0	0	22.814285714285713	24.5	1.3676221144035854	1.3979400086720377
Chr2	2681830	2682078	Chr2_2681830_2682078_-	29.0	13.0	1	16.666666666666668	18.0	1.2346859743215286	1.2671717284030137
Chr2	2691290	2691469	Chr2_2691290_2691469_+	0.0	43.0	0	0.0	0.0	-0.3010299956639812	-0.3010299956639812
Chr2	2871576	2872068	Chr2_2871576_2872068_-	1.0	41.0	0	7.0	7.0	0.8750612633917001	0.8750612633917001
Chr2	2872068	2872530	Chr2_2872068_2872530_-	11.0	31.0	0	13.0	12.0	1.130333768495006	1.0969100130080565
Chr2	2872520	2873165	Chr2_2872520_2873165_+	15.0	27.0	0	12.714285714285714	15.0	1.1210436927247758	1.1903316981702914
Chr2	2873202	2875615	Chr2_2873202_2875615_-	22.0	20.0	0	25.68	25.0	1.417969642214737	1.4065401804339552
Chr2	2875702	2876336	Chr2_2875702_2876336_-	20.0	22.0	0	23.857142857142858	22.0	1.3866263433142596	1.3521825181113625
Chr2	2876336	2876679	Chr2_2876336_2876679_+	32.0	10.0	0	25.25	25.0	1.4107772333772097	1.4065401804339552
Chr2	2892809	2893020	Chr2_2892809_2893020_-	28.0	14.0	1	26.666666666666668	27.0	1.4340363540203143	1.4393326938302626
Chr2	2893746	2894076	Chr2_2893746_2894076_-	39.0	3.0	1	35.0	35.5	1.550228353055094	1.5563025007672873
Chr2	2901553	2901720	Chr2_2901553_2901720_+	26.0	16.0	1	23.333333333333332	24.0	1.3771847870814182	1.3891660843645324
Chr2	2911519	2911716	Chr2_2911519_2911716_+	33.0	9.0	1	31.666666666666668	33.0	1.5074060586241302	1.5250448070368452
Chr2	2942362	2942542	Chr2_2942362_2942542_-	32.0	10.0	1	32.0	32.0	1.5118833609788744	1.5118833609788744
Chr2	2945756	2947618	Chr2_2945756_2947618_-	34.0	8.0	1	29.95	29.0	1.4835872969688941	1.469822015978163
Chr2	2947632	2949489	Chr2_2947632_2949489_+	32.0	10.0	1	32.0	32.0	1.5118833609788744	1.5118833609788744
Chr2	2949489	2949598	Chr2_2949489_2949598_+	32.0	10.0	1	33.5	33.5	1.5314789170422551	1.5314789170422551
Chr2	2949796	2950008	Chr2_2949796_2950008_+	35.0	7.0	1	35.0	35.0	1.550228353055094	1.550228353055094
Chr2	2975373	2981246	Chr2_2975373_2981246_-	25.0	17.0	1	16.516666666666666	16.0	1.2308744917032666	1.2174839442139063
Chr2	2981248	2986776	Chr2_2981248_2986776_-	23.0	19.0	1	27.892857142857142	27.0	1.453209097314251	1.4393326938302626
Chr2	2986826	2987031	Chr2_2986826_2987031_-	26.0	16.0	1	24.0	23.0	1.3891660843645324	1.3710678622717363
Chr2	3003720	3004283	Chr2_3003720_3004283_+	13.0	29.0	0	17.833333333333332	15.5	1.2632414347745813	1.2041199826559248
Chr2	3004279	3005019	Chr2_3004279_3005019_-	13.0	29.0	0	18.77777777777778	16.0	1.2850569696875678	1.2174839442139063
Chr2	3004911	3006782	Chr2_3004911_3006782_-	24.0	18.0	0	26.473684210526315	27.0	1.4309402687749628	1.4393326938302626
Chr2	3005600	3006487	Chr2_3005600_3006487_+	16.0	26.0	0	23.0	22.0	1.3710678622717363	1.3521825181113625
Chr2	3006782	3007416	Chr2_3006782_3007416_+	27.0	15.0	0	18.625	21.0	1.281601443825655	1.3324384599156054
Chr2	3007453	3017042	Chr2_3007453_3017042_-	16.0	26.0	0	27.422680412371133	30.0	1.4459571056569767	1.4842998393467859
Chr2	3008327	3015842	Chr2_3008327_3015842_-	9.0	33.0	0	25.44736842105263	28.0	1.414093318324401	1.4548448600085102
Chr2	3017422	3018050	Chr2_3017422_3018050_-	8.0	34.0	0	10.142857142857142	8.0	1.027058232734036	0.9294189257142927
Chr2	3018150	3018587	Chr2_3018150_3018587_+	33.0	9.0	0	31.8	32.0	1.5092025223311027	1.5118833609788744
Chr2	3018587	3019063	Chr2_3018587_3019063_+	32.0	10.0	0	21.833333333333332	19.5	1.348953547981164	1.3010299956639813
Chr2	3019063	3025046	Chr2_3019063_3025046_+	14.0	28.0	0	18.721311475409838	18.0	1.283783016376354	1.2671717284030137
Chr2	3025046	3025522	Chr2_3025046_3025522_+	22.0	20.0	0	15.5	16.5	1.2041199826559248	1.2304489213782739
Chr2	3025522	3025733	Chr2_3025522_3025733_+	5.0	37.0	0	12.0	10.0	1.0969100130080565	1.021189299069938
Chr2	3025816	3026101	Chr2_3025816_3026101_-	23.0	19.0	0	24.75	25.0	1.4022613824546801	1.4065401804339552
Chr2	3026312	3026933	Chr2_3026312_3026933_-	25.0	17.0	0	24.714285714285715	25.0	1.4016466697095846	1.4065401804339552
Chr2	3026944	3027350	Chr2_3026944_3027350_+	23.0	19.0	0	21.2	21.0	1.3364597338485296	1.3324384599156054
Chr2	3028870	3029490	Chr2_3028870_3029490_-	24.0	18.0	0	20.714285714285715	20.0	1.3266284136389743	1.3117538610557542
Chr2	3029492	3030088	Chr2_3029492_3030088_-	21.0	21.0	0	20.714285714285715	21.0	1.3266284136389743	1.3324384599156054
Chr2	3030223	3030376	Chr2_3030223_3030376_-	16.0	26.0	1	15.5	15.5	1.2041199826559248	1.2041199826559248
Chr2	3030390	3030941	Chr2_3030390_3030941_+	15.0	27.0	1	9.857142857142858	8.0	1.0152399665567369	0.9294189257142927
Chr2	3032059	3032662	Chr2_3032059_3032662_+	15.0	27.0	1	13.142857142857142	13.0	1.1349053315694895	1.130333768495006
Chr2	3032744	3033379	Chr2_3032744_3033379_+	10.0	32.0	1	8.0	8.0	0.9294189257142927	0.9294189257142927
Chr2	3033462	3033730	Chr2_3033462_3033730_-	6.0	36.0	1	10.25	9.5	1.0314084642516241	1.0
Chr2	3119906	3120833	Chr2_3119906_3120833_+	12.0	30.0	0	26.2	27.5	1.4265112613645752	1.4471580313422192
Chr2	3120942	3121590	Chr2_3120942_3121590_-	16.0	26.0	1	10.571428571428571	14.0	1.0442036624920534	1.1613680022349748
Chr2	3141624	3141845	Chr2_3141624_3141845_+	23.0	19.0	1	23.0	23.0	1.3710678622717363	1.3710678622717363
Chr2	3171116	3171781	Chr2_3171116_3171781_-	23.0	19.0	1	23.0	23.0	1.3710678622717363	1.3710678622717363
Chr2	3172196	3172336	Chr2_3172196_3172336_+	23.0	19.0	1	23.0	23.0	1.3710678622717363	1.3710678622717363
Chr2	3174783	3175794	Chr2_3174783_3175794_+	23.0	19.0	1	23.0	23.0	1.3710678622717363	1.3710678622717363
Chr2	3179335	3181031	Chr2_3179335_3181031_-	23.0	19.0	1	23.0	23.0	1.3710678622717363	1.3710678622717363
Chr2	3205158	3205336	Chr2_3205158_3205336_+	24.0	18.0	1	24.333333333333332	24.0	1.3950350180286304	1.3891660843645324
Chr2	3207709	3207915	Chr2_3207709_3207915_-	22.0	20.0	1	21.666666666666668	22.0	1.3457003905834422	1.3521825181113625
Chr2	3215508	3215609	Chr2_3215508_3215609_+	28.0	14.0	1	25.5	25.5	1.414973347970818	1.414973347970818
Chr2	3219273	3224795	Chr2_3219273_3224795_+	31.0	11.0	1	17.553571428571427	18.0	1.2565631285848007	1.2671717284030137
Chr2	3231036	3231233	Chr2_3231036_3231233_+	33.0	9.0	1	32.0	33.0	1.5118833609788744	1.5250448070368452
Chr2	3255348	3256115	Chr2_3255348_3256115_+	28.0	14.0	1	22.666666666666668	22.0	1.3648635498704516	1.3521825181113625
Chr2	3260262	3260752	Chr2_3260262_3260752_+	19.0	23.0	1	13.666666666666666	14.0	1.151267675330649	1.1613680022349748
Chr2	3306259	3306483	Chr2_3306259_3306483_+	15.0	27.0	1	15.0	15.0	1.1903316981702914	1.1903316981702914
Chr2	3306771	3312299	Chr2_3306771_3312299_+	15.0	27.0	1	28.0	28.0	1.4548448600085102	1.4548448600085102
Chr2	3340756	3340969	Chr2_3340756_3340969_-	12.0	30.0	1	17.333333333333332	19.0	1.251232527301566	1.290034611362518
Chr2	3340971	3346499	Chr2_3340971_3346499_-	21.0	21.0	1	27.946428571428573	27.0	1.4540277487949311	1.4393326938302626
Chr2	3373216	3373343	Chr2_3373216_3373343_+	20.0	22.0	1	20.0	20.0	1.3117538610557542	1.3117538610557542
Chr2	3376999	3382485	Chr2_3376999_3382485_+	40.0	2.0	1	18.017857142857142	17.0	1.2675907293828406	1.2430380486862944
Chr2	3422833	3422999	Chr2_3422833_3422999_-	21.0	21.0	1	20.0	20.0	1.3117538610557542	1.3117538610557542
Chr2	3430514	3430720	Chr2_3430514_3430720_+	22.0	20.0	1	22.0	22.0	1.3521825181113625	1.3521825181113625
Chr2	3437759	3439101	Chr2_3437759_3439101_-	18.0	24.0	1	14.333333333333334	14.0	1.1712387562612692	1.1613680022349748
Chr2	3439101	3439534	Chr2_3439101_3439534_+	18.0	24.0	1	9.8	8.0	1.0128372247051722	0.9294189257142927
Chr2	3439534	3450407	Chr2_3439534_3450407_-	10.0	32.0	1	16.51818181818182	17.0	1.2309131592438614	1.2430380486862944
Chr2	3440257	3440733	Chr2_3440257_3440733_+	6.0	36.0	1	14.666666666666666	16.5	1.18089014193745	1.2304489213782739
Chr2	3440733	3446716	Chr2_3440733_3446716_+	19.0	23.0	1	18.59016393442623	18.0	1.2808096578599324	1.2671717284030137
Chr2	3446716	3447192	Chr2_3446716_3447192_+	16.0	26.0	1	14.6	16.0	1.1789769472931695	1.2174839442139063
Chr2	3448107	3448540	Chr2_3448107_3448540_+	7.0	35.0	1	3.8	3.0	0.6334684555795865	0.5440680443502757
Chr2	3450407	3450866	Chr2_3450407_3450866_-	6.0	36.0	1	12.0	11.0	1.0969100130080565	1.0606978403536116
Chr2	3450866	3451319	Chr2_3450866_3451319_-	11.0	31.0	1	14.166666666666666	12.5	1.166331421766525	1.1139433523068367
Chr2	3464098	3464461	Chr2_3464098_3464461_+	28.0	14.0	1	19.6	18.0	1.3031960574204888	1.2671717284030137
Chr2	3464461	3465751	Chr2_3464461_3465751_-	18.0	24.0	1	14.857142857142858	13.0	1.1863104242373672	1.130333768495006
Chr2	3465751	3466204	Chr2_3465751_3466204_+	25.0	17.0	1	24.0	25.0	1.3891660843645324	1.4065401804339552
Chr2	3475719	3476384	Chr2_3475719_3476384_-	27.0	15.0	1	24.857142857142858	25.0	1.404100317376856	1.4065401804339552
Chr2	3476800	3476940	Chr2_3476800_3476940_+	28.0	14.0	1	27.5	27.5	1.4471580313422192	1.4471580313422192
Chr2	3479386	3481245	Chr2_3479386_3481245_+	24.0	18.0	1	24.25	24.5	1.3935752032695876	1.3979400086720377
Chr2	3484270	3484446	Chr2_3484270_3484446_-	28.0	14.0	1	28.0	28.0	1.4548448600085102	1.4548448600085102
Chr2	3492697	3492937	Chr2_3492697_3492937_+	28.0	14.0	1	28.0	28.0	1.4548448600085102	1.4548448600085102
Chr2	3498712	3499110	Chr2_3498712_3499110_-	28.0	14.0	1	28.0	28.0	1.4548448600085102	1.4548448600085102
Chr2	3500106	3508438	Chr2_3500106_3508438_+	28.0	14.0	1	29.416666666666668	28.0	1.4759132025306942	1.4548448600085102
Chr2	3506029	3506188	Chr2_3506029_3506188_-	28.0	14.0	1	28.0	28.0	1.4548448600085102	1.4548448600085102
Chr2	3508484	3508729	Chr2_3508484_3508729_-	34.0	8.0	1	34.0	34.0	1.5378190950732742	1.5378190950732742
Chr2	3510927	3511140	Chr2_3510927_3511140_-	26.0	16.0	1	28.666666666666668	26.0	1.4648867983026508	1.423245873936808
Chr2	3511622	3512104	Chr2_3511622_3512104_-	34.0	8.0	1	34.0	34.0	1.5378190950732742	1.5378190950732742
Chr2	3515413	3515647	Chr2_3515413_3515647_+	34.0	8.0	1	34.0	34.0	1.5378190950732742	1.5378190950732742
Chr2	3519307	3519445	Chr2_3519307_3519445_-	34.0	8.0	1	34.0	34.0	1.5378190950732742	1.5378190950732742
Chr2	3524667	3530540	Chr2_3524667_3530540_-	25.0	17.0	1	23.8	23.0	1.3856062735983121	1.3710678622717363
Chr2	3543299	3544999	Chr2_3543299_3544999_+	33.0	9.0	1	33.0	33.0	1.5250448070368452	1.5250448070368452
Chr2	3551278	3551610	Chr2_3551278_3551610_+	33.0	9.0	1	33.0	33.0	1.5250448070368452	1.5250448070368452
Chr2	3555512	3561034	Chr2_3555512_3561034_-	27.0	15.0	1	17.589285714285715	18.0	1.25742141835408	1.2671717284030137
Chr2	3561962	3567835	Chr2_3561962_3567835_+	26.0	16.0	1	22.366666666666667	19.5	1.3592028609870892	1.3010299956639813
Chr2	3582575	3584030	Chr2_3582575_3584030_-	33.0	9.0	1	33.0	33.0	1.5250448070368452	1.5250448070368452
Chr2	3606169	3612042	Chr2_3606169_3612042_-	20.0	22.0	1	16.483333333333334	16.0	1.2300229336227828	1.2174839442139063
Chr2	3612146	3612686	Chr2_3612146_3612686_-	17.0	25.0	0	18.333333333333332	17.0	1.274927193099776	1.2430380486862944
Chr2	3613384	3613824	Chr2_3613384_3613824_+	25.0	17.0	0	22.166666666666668	22.0	1.355387657986574	1.3521825181113625
Chr2	3620789	3627343	Chr2_3620789_3627343_-	25.0	17.0	0	32.32835820895522	33.0	1.5162491636120552	1.5250448070368452
Chr2	3627353	3633889	Chr2_3627353_3633889_-	27.0	15.0	0	28.272727272727273	31.0	1.4589810291951488	1.4983105537896004
Chr2	3629960	3630430	Chr2_3629960_3630430_-	9.0	33.0	0	10.833333333333334	9.5	1.0543576623225928	1.0
Chr2	3633903	3634434	Chr2_3633903_3634434_-	32.0	10.0	0	33.5	33.5	1.5314789170422551	1.5314789170422551
Chr2	3634368	3635004	Chr2_3634368_3635004_-	31.0	11.0	0	29.625	28.5	1.4789270555829248	1.462397997898956
Chr2	3635004	3640178	Chr2_3635004_3640178_+	39.0	3.0	0	33.0	35.0	1.5250448070368452	1.550228353055094
Chr2	3640216	3640852	Chr2_3640216_3640852_-	34.0	8.0	0	28.857142857142858	29.0	1.467713786197831	1.469822015978163
Chr2	3640845	3641202	Chr2_3640845_3641202_+	25.0	17.0	0	27.4	28.0	1.4456042032735976	1.4548448600085102
Chr2	3641170	3645759	Chr2_3641170_3645759_+	29.0	13.0	0	25.78723404255319	26.0	1.4197448918023807	1.423245873936808
Chr2	3641423	3642083	Chr2_3641423_3642083_+	20.0	22.0	0	25.428571428571427	26.0	1.4137785893578745	1.423245873936808
Chr2	3649080	3649716	Chr2_3649080_3649716_-	22.0	20.0	0	33.875	36.5	1.536242706838319	1.568201724066995
Chr2	3649716	3652110	Chr2_3649716_3652110_+	40.0	2.0	0	36.24	39.0	1.5651391519697895	1.5965970956264601
Chr2	3652105	3652742	Chr2_3652105_3652742_+	4.0	38.0	0	6.571428571428571	7.0	0.8495071589193118	0.8750612633917001
Chr2	3652746	3661600	Chr2_3652746_3661600_-	15.0	27.0	0	16.46067415730337	15.0	1.2294431107142036	1.1903316981702914
Chr2	3654489	3661363	Chr2_3654489_3661363_+	1.0	41.0	0	17.928571428571427	16.0	1.265491670284992	1.2174839442139063
Chr2	3661694	3664681	Chr2_3661694_3664681_-	14.0	28.0	0	29.129032258064516	33.0	1.4717174668075546	1.5250448070368452
Chr2	3664681	3665329	Chr2_3664681_3665329_+	38.0	4.0	0	33.0	34.0	1.5250448070368452	1.5378190950732742
Chr2	3691301	3691521	Chr2_3691301_3691521_-	0.0	43.0	0	2.0	2.0	0.3979400086720376	0.3979400086720376
Chr2	3691623	3691781	Chr2_3691623_3691781_-	6.0	36.0	0	3.5	3.5	0.6020599913279624	0.6020599913279624
Chr2	3692098	3692617	Chr2_3692098_3692617_-	1.0	41.0	0	4.0	2.0	0.6532125137753437	0.3979400086720376
Chr2	3787150	3787800	Chr2_3787150_3787800_+	2.0	40.0	0	24.857142857142858	30.0	1.404100317376856	1.4842998393467859
Chr2	3787973	3788259	Chr2_3787973_3788259_-	35.0	7.0	0	27.75	26.5	1.4510184521554574	1.4313637641589874
Chr2	3788253	3788567	Chr2_3788253_3788567_+	24.0	18.0	0	16.5	17.5	1.2304489213782739	1.255272505103306
Chr2	3788891	3789225	Chr2_3788891_3789225_+	26.0	16.0	0	24.2	26.0	1.3926969532596658	1.423245873936808
Chr2	3789229	3794358	Chr2_3789229_3794358_-	26.0	16.0	0	23.01923076923077	23.0	1.3714231134014863	1.3710678622717363
Chr2	3794358	3794993	Chr2_3794358_3794993_+	23.0	19.0	0	9.0	9.0	0.9777236052888477	0.9777236052888477
Chr2	3794985	3796699	Chr2_3794985_3796699_+	2.0	40.0	0	27.833333333333332	30.0	1.4522976709946303	1.4842998393467859
Chr2	3796699	3801068	Chr2_3796699_3801068_+	31.0	11.0	0	33.955555555555556	36.0	1.5372592567980015	1.5622928644564746
Chr2	3801078	3813298	Chr2_3801078_3813298_+	29.0	13.0	0	23.504065040650406	23.0	1.3802847948461545	1.3710678622717363
Chr2	3801182	3801511	Chr2_3801182_3801511_-	29.0	13.0	0	26.0	26.0	1.423245873936808	1.423245873936808
Chr2	3802895	3809786	Chr2_3802895_3809786_-	36.0	6.0	0	18.52857142857143	17.0	1.2794061848200253	1.2430380486862944
Chr2	3813285	3813922	Chr2_3813285_3813922_+	35.0	7.0	0	24.75	28.0	1.4022613824546801	1.4548448600085102
Chr2	3813919	3819015	Chr2_3813919_3819015_-	34.0	8.0	0	31.076923076923077	33.0	1.4993698091486227	1.5250448070368452
Chr2	3819015	3819650	Chr2_3819015_3819650_+	37.0	5.0	0	29.0	28.0	1.469822015978163	1.4548448600085102
Chr2	3819733	3820066	Chr2_3819733_3820066_+	18.0	24.0	0	12.5	12.0	1.1139433523068367	1.0969100130080565
Chr2	3820140	3820273	Chr2_3820140_3820273_-	8.0	34.0	0	4.5	4.5	0.6989700043360189	0.6989700043360189
Chr2	3861650	3861883	Chr2_3861650_3861883_-	0.0	43.0	0	0.0	0.0	-0.3010299956639812	-0.3010299956639812
Chr2	3875805	3876012	Chr2_3875805_3876012_-	0.0	43.0	0	0.0	0.0	-0.3010299956639812	-0.3010299956639812
Chr2	3907477	3907657	Chr2_3907477_3907657_-	0.0	43.0	0	0.0	0.0	-0.3010299956639812	-0.3010299956639812
Chr2	3908658	3909317	Chr2_3908658_3909317_-	7.0	35.0	0	4.5	5.0	0.6989700043360189	0.7403626894942439
Chr2	3909336	3909665	Chr2_3909336_3909665_+	1.0	41.0	0	0.25	0.0	-0.12493873660829995	-0.3010299956639812
Chr2	3913310	3913452	Chr2_3913310_3913452_+	0.0	43.0	0	0.5	0.5	0.0	0.0
Chr2	3913450	3913765	Chr2_3913450_3913765_-	1.0	41.0	0	6.25	6.0	0.829303772831025	0.8129133566428556
Chr2	3913765	3914209	Chr2_3913765_3914209_+	12.0	30.0	0	18.833333333333332	19.0	1.2863067388432747	1.290034611362518
Chr2	3914293	3914935	Chr2_3914293_3914935_-	22.0	20.0	0	13.5	10.5	1.146128035678238	1.0413926851582251
Chr2	3914920	3915123	Chr2_3914920_3915123_+	9.0	33.0	0	6.666666666666667	8.0	0.8553172051959429	0.9294189257142927
Chr2	3915208	3915423	Chr2_3915208_3915423_+	0.0	43.0	0	0.0	0.0	-0.3010299956639812	-0.3010299956639812
Chr2	4024801	4024942	Chr2_4024801_4024942_-	0.0	43.0	0	0.0	0.0	-0.3010299956639812	-0.3010299956639812
Chr2	4093594	4093851	Chr2_4093594_4093851_+	1.0	41.0	0	1.5	1.5	0.3010299956639812	0.3010299956639812
Chr2	4104457	4104565	Chr2_4104457_4104565_+	0.0	43.0	0	0.0	0.0	-0.3010299956639812	-0.3010299956639812
Chr2	4110804	4111022	Chr2_4110804_4111022_+	0.0	43.0	0	0.3333333333333333	0.0	-0.07918124604762487	-0.3010299956639812
Chr2	4159068	4159281	Chr2_4159068_4159281_+	0.0	43.0	0	0.0	0.0	-0.3010299956639812	-0.3010299956639812
Chr2	4163471	4163661	Chr2_4163471_4163661_+	0.0	43.0	0	0.0	0.0	-0.3010299956639812	-0.3010299956639812
Chr2	4167060	4167297	Chr2_4167060_4167297_+	0.0	43.0	0	0.0	0.0	-0.3010299956639812	-0.3010299956639812
Chr2	4218179	4218503	Chr2_4218179_4218503_+	0.0	43.0	0	0.0	0.0	-0.3010299956639812	-0.3010299956639812
Chr2	4243481	4243595	Chr2_4243481_4243595_-	0.0	43.0	0	0.0	0.0	-0.3010299956639812	-0.3010299956639812
Chr2	4255002	4255645	Chr2_4255002_4255645_-	2.0	40.0	0	2.0	2.0	0.3979400086720376	0.3979400086720376
Chr2	4274309	4277494	Chr2_4274309_4277494_-	7.0	35.0	0	24.4375	24.5	1.3968529130308234	1.3979400086720377
Chr3	104	393	Chr3_104_393_+	23.0	19.0	0	20.5	20.5	1.3222192947339193	1.3222192947339193
Chr3	2138	3995	Chr3_2138_3995_+	32.0	10.0	0	32.0	32.0	1.5118833609788744	1.5118833609788744
Chr3	103190	103339	Chr3_103190_103339_-	0.0	43.0	0	0.0	0.0	-0.3010299956639812	-0.3010299956639812
Chr3	127511	128131	Chr3_127511_128131_+	7.0	35.0	0	12.428571428571429	14.0	1.1115505391909466	1.1613680022349748
Chr3	128266	128612	Chr3_128266_128612_+	15.0	27.0	0	10.0	10.0	1.021189299069938	1.021189299069938
Chr3	128615	129558	Chr3_128615_129558_+	4.0	38.0	0	9.5	9.0	1.0	0.9777236052888477
Chr3	129577	130330	Chr3_129577_130330_-	16.0	26.0	0	14.222222222222221	17.0	1.1679733688335017	1.2430380486862944
Chr3	130366	130999	Chr3_130366_130999_-	5.0	37.0	0	5.0	5.0	0.7403626894942439	0.7403626894942439
Chr3	131036	132326	Chr3_131036_132326_-	23.0	19.0	0	28.142857142857142	28.5	1.4570163369419442	1.462397997898956
Chr3	132388	132963	Chr3_132388_132963_-	31.0	11.0	0	33.857142857142854	34.0	1.5360170406955937	1.5378190950732742
Chr3	133024	134937	Chr3_133024_134937_-	38.0	4.0	0	30.8	31.0	1.4955443375464486	1.4983105537896004
Chr3	134929	135574	Chr3_134929_135574_+	22.0	20.0	0	17.285714285714285	16.0	1.2500713114174984	1.2174839442139063
Chr3	135657	136321	Chr3_135657_136321_-	24.0	18.0	0	35.5	37.5	1.5563025007672873	1.5797835966168101
Chr3	136915	140108	Chr3_136915_140108_-	35.0	7.0	0	32.75757575757576	34.0	1.5218905890362715	1.5378190950732742
Chr3	140203	147686	Chr3_140203_147686_+	19.0	23.0	0	19.586666666666666	20.0	1.302907872617676	1.3117538610557542
Chr3	147693	147927	Chr3_147693_147927_-	24.0	18.0	0	20.0	19.5	1.3117538610557542	1.3010299956639813
Chr3	147926	148158	Chr3_147926_148158_+	28.0	14.0	0	28.0	28.0	1.4548448600085102	1.4548448600085102
Chr3	148165	149892	Chr3_148165_149892_+	26.0	16.0	0	29.22222222222222	29.0	1.4730812769179225	1.469822015978163
Chr3	149892	156721	Chr3_149892_156721_+	23.0	19.0	0	18.3	16.0	1.2741578492636798	1.2174839442139063
Chr3	156721	158006	Chr3_156721_158006_+	26.0	16.0	0	34.285714285714285	34.5	1.5414009255363963	1.5440680443502757
Chr3	158007	159864	Chr3_158007_159864_-	32.0	10.0	0	32.05263157894737	32.0	1.5125861030123104	1.5118833609788744
Chr3	159866	160363	Chr3_159866_160363_+	33.0	9.0	0	35.5	35.5	1.5563025007672873	1.5563025007672873
Chr3	160965	163527	Chr3_160965_163527_+	35.0	7.0	1	33.888888888888886	34.0	1.5364181439168119	1.5378190950732742
Chr3	163592	164182	Chr3_163592_164182_+	37.0	5.0	1	30.285714285714285	31.0	1.4883492344824936	1.4983105537896004
Chr3	164244	165534	Chr3_164244_165534_+	29.0	13.0	1	31.428571428571427	31.0	1.5041794874536984	1.4983105537896004
Chr3	165573	166277	Chr3_165573_166277_+	29.0	13.0	1	21.0	23.5	1.3324384599156054	1.380211241711606
Chr3	168502	168886	Chr3_168502_168886_+	11.0	31.0	1	12.25	12.5	1.105510184769974	1.1139433523068367
Chr3	168893	169537	Chr3_168893_169537_-	13.0	29.0	1	15.0	14.0	1.1903316981702914	1.1613680022349748
Chr3	169623	170246	Chr3_169623_170246_-	23.0	19.0	1	16.285714285714285	17.0	1.2249398265934983	1.2430380486862944
Chr3	214383	214625	Chr3_214383_214625_+	0.0	43.0	0	2.0	1.0	0.3979400086720376	0.17609125905568124
Chr3	214637	218432	Chr3_214637_218432_+	6.0	36.0	0	29.871794871794872	32.0	1.4824704580322847	1.5118833609788744
Chr3	215700	217557	Chr3_215700_217557_+	32.0	10.0	0	32.0	32.0	1.5118833609788744	1.5118833609788744
Chr3	218417	219056	Chr3_218417_219056_+	25.0	17.0	0	18.142857142857142	21.0	1.2705124716600429	1.3324384599156054
Chr3	219139	219454	Chr3_219139_219454_-	19.0	23.0	0	17.75	18.0	1.2612628687924936	1.2671717284030137
Chr3	220670	220874	Chr3_220670_220874_-	17.0	25.0	1	15.333333333333334	16.0	1.1995723549052042	1.2174839442139063
Chr3	225745	225870	Chr3_225745_225870_+	0.0	43.0	1	0.5	0.5	0.0	0.0
Chr3	226009	226656	Chr3_226009_226656_-	0.0	43.0	1	7.428571428571429	9.0	0.8991949431084194	0.9777236052888477
Chr3	226716	227374	Chr3_226716_227374_+	9.0	33.0	1	6.285714285714286	8.0	0.8315955696106098	0.9294189257142927
Chr3	227478	234954	Chr3_227478_234954_+	6.0	36.0	1	20.394736842105264	19.0	1.320036905810286	1.290034611362518
Chr3	239138	239537	Chr3_239138_239537_-	10.0	32.0	0	12.0	11.0	1.0969100130080565	1.0606978403536116
Chr3	239550	239877	Chr3_239550_239877_+	15.0	27.0	0	17.5	17.5	1.255272505103306	1.255272505103306
Chr3	239945	247460	Chr3_239945_247460_-	16.0	26.0	0	20.236842105263158	19.5	1.316742620872745	1.3010299956639813
Chr3	247487	247894	Chr3_247487_247894_-	8.0	34.0	0	22.0	21.0	1.3521825181113625	1.3324384599156054
Chr3	247894	248036	Chr3_247894_248036_+	35.0	7.0	0	28.0	30.0	1.4548448600085102	1.4842998393467859
Chr3	247978	248615	Chr3_247978_248615_-	30.0	12.0	0	15.75	12.5	1.2108533653148932	1.1139433523068367
Chr3	248615	249151	Chr3_248615_249151_+	13.0	29.0	0	11.833333333333334	12.0	1.0910804693473326	1.0969100130080565
Chr3	249151	259485	Chr3_249151_259485_+	9.0	33.0	0	23.83653846153846	25.5	1.3862588058594738	1.414973347970818
Chr3	249939	257443	Chr3_249939_257443_-	11.0	31.0	0	25.486842105263158	27.5	1.4147535076816877	1.4471580313422192
Chr3	259485	260123	Chr3_259485_260123_+	5.0	37.0	0	4.25	3.0	0.6766936096248666	0.5440680443502757
Chr3	260206	265190	Chr3_260206_265190_+	14.0	28.0	0	16.78	15.0	1.2375437381428744	1.1903316981702914
Chr3	263281	263563	Chr3_263281_263563_+	5.0	37.0	0	6.75	6.0	0.8603380065709937	0.8129133566428556
Chr3	332732	332994	Chr3_332732_332994_+	0.0	43.0	1	0.0	0.0	-0.3010299956639812	-0.3010299956639812
Chr3	336600	336830	Chr3_336600_336830_-	0.0	43.0	1	0.0	0.0	-0.3010299956639812	-0.3010299956639812
Chr3	342666	342882	Chr3_342666_342882_-	0.0	43.0	1	0.0	0.0	-0.3010299956639812	-0.3010299956639812
Chr3	346009	346190	Chr3_346009_346190_-	0.0	43.0	1	0.0	0.0	-0.3010299956639812	-0.3010299956639812
Chr3	354455	354620	Chr3_354455_354620_+	0.0	43.0	1	0.0	0.0	-0.3010299956639812	-0.3010299956639812
Chr3	419769	419915	Chr3_419769_419915_-	1.0	41.0	0	0.3333333333333333	0.0	-0.07918124604762487	-0.3010299956639812
Chr3	489568	489712	Chr3_489568_489712_-	0.0	43.0	0	0.0	0.0	-0.3010299956639812	-0.3010299956639812
Chr3	599663	599866	Chr3_599663_599866_-	0.0	43.0	0	0.0	0.0	-0.3010299956639812	-0.3010299956639812
Chr3	604572	604692	Chr3_604572_604692_-	0.0	43.0	0	0.0	0.0	-0.3010299956639812	-0.3010299956639812
Chr3	615597	615844	Chr3_615597_615844_+	0.0	43.0	0	0.0	0.0	-0.3010299956639812	-0.3010299956639812
Chr3	624078	624203	Chr3_624078_624203_+	0.0	43.0	0	0.0	0.0	-0.3010299956639812	-0.3010299956639812
Chr3	638709	638909	Chr3_638709_638909_-	0.0	43.0	0	0.0	0.0	-0.3010299956639812	-0.3010299956639812
Chr3	658965	659078	Chr3_658965_659078_-	0.0	43.0	0	0.0	0.0	-0.3010299956639812	-0.3010299956639812
Chr3	858059	858186	Chr3_858059_858186_-	0.0	43.0	0	0.0	0.0	-0.3010299956639812	-0.3010299956639812
Chr3	888285	888543	Chr3_888285_888543_+	0.0	43.0	0	1.0	0.5	0.17609125905568124	0.0
Chr3	960110	960254	Chr3_960110_960254_+	0.0	43.0	0	0.0	0.0	-0.3010299956639812	-0.3010299956639812
Chr3	1069032	1069183	Chr3_1069032_1069183_-	0.0	43.0	0	0.0	0.0	-0.3010299956639812	-0.3010299956639812
Chr3	1195228	1195370	Chr3_1195228_1195370_-	0.0	43.0	0	0.0	0.0	-0.3010299956639812	-0.3010299956639812
Chr3	1305477	1307745	Chr3_1305477_1307745_-	0.0	43.0	0	19.958333333333332	19.5	1.3108702504113625	1.3010299956639813
Chr3	1463598	1463777	Chr3_1463598_1463777_-	0.0	43.0	0	0.0	0.0	-0.3010299956639812	-0.3010299956639812
Chr3	1464586	1464759	Chr3_1464586_1464759_-	0.0	43.0	0	0.0	0.0	-0.3010299956639812	-0.3010299956639812
Chr3	1511502	1511616	Chr3_1511502_1511616_-	0.0	43.0	0	0.0	0.0	-0.3010299956639812	-0.3010299956639812
Chr3	1681078	1681234	Chr3_1681078_1681234_+	0.0	43.0	0	0.0	0.0	-0.3010299956639812	-0.3010299956639812
Chr3	1684293	1684518	Chr3_1684293_1684518_-	0.0	43.0	0	0.0	0.0	-0.3010299956639812	-0.3010299956639812
Chr3	1722587	1722768	Chr3_1722587_1722768_-	0.0	43.0	0	0.3333333333333333	0.0	-0.07918124604762487	-0.3010299956639812
Chr3	1723134	1738329	Chr3_1723134_1738329_-	13.0	29.0	0	14.88888888888889	14.0	1.1872072639611424	1.1613680022349748
Chr3	1723517	1730345	Chr3_1723517_1730345_+	13.0	29.0	0	19.6231884057971	20.0	1.303696793349021	1.3117538610557542
Chr3	1730691	1737172	Chr3_1730691_1737172_+	11.0	31.0	0	8.848484848484848	7.0	0.970741228491373	0.8750612633917001
Chr3	1737172	1737667	Chr3_1737172_1737667_-	7.0	35.0	0	12.833333333333334	15.0	1.1249387366083	1.1903316981702914
Chr3	1737670	1738069	Chr3_1737670_1738069_+	2.0	40.0	0	6.8	2.0	0.8633228601204559	0.3979400086720376
Chr3	1738329	1747690	Chr3_1738329_1747690_+	26.0	16.0	0	27.085106382978722	29.0	1.4406746631696528	1.469822015978163
Chr3	1743294	1745151	Chr3_1743294_1745151_+	29.0	13.0	0	31.95	32.0	1.5112147011363881	1.5118833609788744
Chr3	1747697	1748073	Chr3_1747697_1748073_-	25.0	17.0	0	27.4	28.0	1.4456042032735976	1.4548448600085102
Chr3	1748071	1748352	Chr3_1748071_1748352_+	26.0	16.0	0	18.0	16.0	1.2671717284030137	1.2174839442139063
Chr3	1748436	1749070	Chr3_1748436_1749070_-	22.0	20.0	0	19.285714285714285	19.0	1.2963517333862105	1.290034611362518
Chr3	1749070	1754122	Chr3_1749070_1754122_+	24.0	18.0	0	21.26923076923077	21.0	1.3378430832174535	1.3324384599156054
Chr3	1754202	1754847	Chr3_1754202_1754847_-	11.0	31.0	0	9.0	9.0	0.9777236052888477	0.9777236052888477
Chr3	1754835	1755201	Chr3_1754835_1755201_+	18.0	24.0	0	21.2	20.0	1.3364597338485296	1.3117538610557542
Chr3	1755284	1755625	Chr3_1755284_1755625_-	23.0	19.0	0	17.4	16.0	1.252853030979893	1.2174839442139063
Chr3	1764268	1764570	Chr3_1764268_1764570_+	23.0	19.0	0	23.0	23.0	1.3710678622717363	1.3710678622717363
Chr3	1767457	1767706	Chr3_1767457_1767706_+	0.0	43.0	0	0.5	0.0	0.0	-0.3010299956639812
Chr3	1800614	1800717	Chr3_1800614_1800717_+	0.0	43.0	0	0.0	0.0	-0.3010299956639812	-0.3010299956639812
Chr3	1815798	1815976	Chr3_1815798_1815976_-	0.0	43.0	0	0.0	0.0	-0.3010299956639812	-0.3010299956639812
Chr3	1824015	1824264	Chr3_1824015_1824264_-	0.0	43.0	0	0.0	0.0	-0.3010299956639812	-0.3010299956639812
Chr3	1892250	1892510	Chr3_1892250_1892510_+	0.0	43.0	0	0.5	0.5	0.0	0.0
Chr3	1932130	1932392	Chr3_1932130_1932392_+	1.0	41.0	0	13.666666666666666	14.0	1.151267675330649	1.1613680022349748
Chr3	1932399	1932680	Chr3_1932399_1932680_-	14.0	28.0	0	4.75	2.5	0.7201593034059569	0.47712125471966244
Chr3	1932680	1933320	Chr3_1932680_1933320_+	0.0	43.0	0	18.125	20.0	1.2700962814203305	1.3117538610557542
Chr3	1933320	1933430	Chr3_1933320_1933430_-	24.0	18.0	0	25.0	25.0	1.4065401804339552	1.4065401804339552
Chr3	1933730	1934231	Chr3_1933730_1934231_-	24.0	18.0	0	21.333333333333332	25.5	1.3391200452721206	1.414973347970818
Chr3	2061105	2061936	Chr3_2061105_2061936_+	0.0	43.0	0	0.0	0.0	-0.3010299956639812	-0.3010299956639812
Chr3	2092523	2092664	Chr3_2092523_2092664_-	0.0	43.0	0	0.0	0.0	-0.3010299956639812	-0.3010299956639812
Chr3	2197602	2197779	Chr3_2197602_2197779_+	0.0	43.0	0	0.0	0.0	-0.3010299956639812	-0.3010299956639812
Chr3	2371786	2372011	Chr3_2371786_2372011_-	12.0	30.0	0	13.5	12.0	1.146128035678238	1.0969100130080565
Chr3	2372013	2372412	Chr3_2372013_2372412_+	23.0	19.0	0	12.8	18.0	1.1238516409670858	1.2671717284030137
Chr3	2374572	2375331	Chr3_2374572_2375331_+	6.0	36.0	0	21.555555555555557	26.0	1.343518001659809	1.423245873936808
Chr3	2375418	2375788	Chr3_2375418_2375788_-	12.0	30.0	0	16.75	17.0	1.236789099409293	1.2430380486862944
Chr3	2375871	2376066	Chr3_2375871_2376066_-	22.0	20.0	0	19.333333333333332	20.0	1.2973957110088872	1.3117538610557542
Chr3	2376066	2383635	Chr3_2376066_2383635_-	20.0	22.0	0	22.883116883116884	24.0	1.3689024005348223	1.3891660843645324
Chr3	2383635	2384082	Chr3_2383635_2384082_-	26.0	16.0	0	24.4	24.0	1.3961993470957363	1.3891660843645324
Chr3	2384082	2385998	Chr3_2384082_2385998_+	28.0	14.0	0	28.65	29.0	1.4646385590950328	1.469822015978163
Chr3	2385998	2386638	Chr3_2385998_2386638_-	22.0	20.0	0	23.25	23.5	1.3756636139608853	1.380211241711606
Chr3	2386637	2386781	Chr3_2386637_2386781_+	27.0	15.0	0	18.5	18.5	1.2787536009528289	1.2787536009528289
Chr3	2386880	2388468	Chr3_2386880_2388468_+	12.0	30.0	0	18.705882352941178	17.0	1.283434264232819	1.2430380486862944
Chr3	2388468	2401393	Chr3_2388468_2401393_-	7.0	35.0	0	21.138461538461538	22.0	1.3352263798583641	1.3521825181113625
Chr3	2389855	2399723	Chr3_2389855_2399723_+	14.0	28.0	0	20.71	22.0	1.326540668516562	1.3521825181113625
Chr3	2401440	2405849	Chr3_2401440_2405849_-	15.0	27.0	0	24.6	24.0	1.3996737214810382	1.3891660843645324
Chr3	2405849	2407008	Chr3_2405849_2407008_+	34.0	8.0	0	32.23076923076923	33.0	1.5149562121137699	1.5250448070368452
Chr3	2407008	2419626	Chr3_2407008_2419626_+	8.0	34.0	0	24.64566929133858	26.0	1.400463199538047	1.423245873936808
Chr3	2407715	2407912	Chr3_2407715_2407912_-	28.0	14.0	0	26.333333333333332	26.0	1.4286746256482061	1.423245873936808
Chr3	2407960	2415514	Chr3_2407960_2415514_-	26.0	16.0	0	23.324675324675326	25.0	1.3770269909194848	1.4065401804339552
Chr3	2419626	2419823	Chr3_2419626_2419823_+	9.0	33.0	0	17.333333333333332	20.0	1.251232527301566	1.3117538610557542
Chr3	2419871	2433541	Chr3_2419871_2433541_+	20.0	22.0	0	25.391304347826086	26.0	1.4131539298012035	1.423245873936808
Chr3	2423298	2425183	Chr3_2423298_2425183_-	28.0	14.0	0	26.45	28.0	1.4305587695227575	1.4548448600085102
Chr3	2425183	2432555	Chr3_2425183_2432555_-	25.0	17.0	0	23.773333333333333	24.0	1.3851294198782624	1.3891660843645324
Chr3	2433588	2436704	Chr3_2433588_2436704_+	29.0	13.0	0	28.848484848484848	31.0	1.4675856851772422	1.4983105537896004
Chr3	2436704	2438848	Chr3_2436704_2438848_+	18.0	24.0	0	19.636363636363637	19.0	1.3039810454008633	1.290034611362518
Chr3	2438850	2441511	Chr3_2438850_2441511_-	25.0	17.0	0	30.535714285714285	32.5	1.4918617451064473	1.5185139398778875
Chr3	2441511	2444348	Chr3_2441511_2444348_-	17.0	25.0	0	28.310344827586206	30.0	1.4595484563304542	1.4842998393467859
Chr3	2444348	2449363	Chr3_2444348_2449363_+	30.0	12.0	0	24.627450980392158	26.0	1.4001484344223265	1.423245873936808
Chr3	2449363	2456941	Chr3_2449363_2456941_-	23.0	19.0	0	23.649350649350648	24.0	1.3829054575225095	1.3891660843645324
Chr3	2456941	2460264	Chr3_2456941_2460264_+	27.0	15.0	0	17.235294117647058	17.0	1.248838395097896	1.2430380486862944
Chr3	2460301	2460939	Chr3_2460301_2460939_-	5.0	37.0	0	9.714285714285714	7.0	1.0092080017868237	0.8750612633917001
Chr3	2460939	2472748	Chr3_2460939_2472748_-	18.0	24.0	0	21.81512605042017	22.0	1.3485993443626252	1.3521825181113625
Chr3	2462323	2472124	Chr3_2462323_2472124_-	25.0	17.0	0	21.404040404040405	21.0	1.3405242318872308	1.3324384599156054
Chr3	2472748	2476469	Chr3_2472748_2476469_+	24.0	18.0	0	28.07894736842105	30.0	1.456046228636018	1.4842998393467859
Chr3	2476469	2484036	Chr3_2476469_2484036_-	23.0	19.0	0	25.571428571428573	26.0	1.4161648287782367	1.423245873936808
Chr3	2484036	2487893	Chr3_2484036_2487893_-	26.0	16.0	0	31.153846153846153	31.0	1.500426487241452	1.4983105537896004
Chr3	2487893	2495465	Chr3_2487893_2495465_+	31.0	11.0	0	22.805194805194805	24.0	1.3674527374967769	1.3891660843645324
Chr3	2495465	2498969	Chr3_2495465_2498969_-	28.0	14.0	0	34.083333333333336	36.0	1.5388668506644678	1.5622928644564746
Chr3	2499067	2499202	Chr3_2499067_2499202_+	30.0	12.0	0	22.333333333333332	25.0	1.358569316772763	1.4065401804339552
Chr3	2499314	2504076	Chr3_2499314_2504076_+	15.0	27.0	0	20.291666666666668	20.0	1.3178893039117838	1.3117538610557542
Chr3	2504355	2504807	Chr3_2504355_2504807_-	12.0	30.0	0	22.333333333333332	22.5	1.358569316772763	1.3617278360175928
Chr3	2504807	2510128	Chr3_2504807_2510128_+	24.0	18.0	0	21.796296296296298	23.0	1.3482327270988372	1.3710678622717363
Chr3	2510128	2512938	Chr3_2510128_2512938_+	16.0	26.0	0	28.20689655172414	30.0	1.4579862442794014	1.4842998393467859
Chr3	2512938	2520113	Chr3_2512938_2520113_+	31.0	11.0	0	22.315068493150687	22.0	1.3582217769067397	1.3521825181113625
Chr3	2520113	2521117	Chr3_2520113_2521117_+	15.0	27.0	0	14.181818181818182	15.0	1.1667798415088966	1.1903316981702914
Chr3	2521117	2525425	Chr3_2521117_2525425_+	18.0	24.0	0	25.704545454545453	27.5	1.4183766308085115	1.4471580313422192
Chr3	2525425	2539216	Chr3_2525425_2539216_+	22.0	20.0	0	24.841726618705035	26.0	1.403836201527299	1.423245873936808
Chr3	2529505	2537075	Chr3_2529505_2537075_-	4.0	38.0	0	21.43421052631579	22.5	1.3411220075472141	1.3617278360175928
Chr3	2539280	2539414	Chr3_2539280_2539414_+	26.0	16.0	0	24.333333333333332	24.0	1.3950350180286304	1.3891660843645324
Chr3	2539414	2541266	Chr3_2539414_2541266_+	24.0	18.0	0	31.105263157894736	33.0	1.4997594107860959	1.5250448070368452
Chr3	2541266	2541422	Chr3_2541266_2541422_+	10.0	32.0	0	4.666666666666667	4.0	0.7132104434506291	0.6532125137753437
Chr3	2543868	2544093	Chr3_2543868_2544093_-	2.0	40.0	0	0.6666666666666666	0.0	0.06694678963061314	-0.3010299956639812
Chr3	2554606	2554814	Chr3_2554606_2554814_+	0.0	43.0	0	3.0	2.0	0.5440680443502757	0.3979400086720376
Chr3	2554972	2555167	Chr3_2554972_2555167_-	9.0	33.0	0	5.0	6.0	0.7403626894942439	0.8129133566428556
Chr3	2760159	2764905	Chr3_2760159_2764905_-	8.0	34.0	0	19.46938775510204	17.0	1.3003647499655062	1.2430380486862944
Chr3	2763619	2764255	Chr3_2763619_2764255_-	9.0	33.0	0	14.428571428571429	12.0	1.174018250432816	1.0969100130080565
Chr3	2764905	2765378	Chr3_2764905_2765378_+	2.0	40.0	0	4.0	5.0	0.6532125137753437	0.7403626894942439
Chr3	2765378	2771359	Chr3_2765378_2771359_+	5.0	37.0	0	9.639344262295081	10.0	1.0060098689543724	1.021189299069938
Chr3	2771359	2771545	Chr3_2771359_2771545_+	17.0	25.0	0	18.333333333333332	18.0	1.274927193099776	1.2671717284030137
Chr3	2771545	2778466	Chr3_2771545_2778466_-	20.0	22.0	0	22.47142857142857	23.0	1.3611880043981757	1.3710678622717363
Chr3	2778465	2778806	Chr3_2778465_2778806_+	24.0	18.0	0	12.8	13.0	1.1238516409670858	1.130333768495006
Chr3	2778806	2781514	Chr3_2778806_2781514_-	13.0	29.0	0	18.392857142857142	20.0	1.2762976406929665	1.3117538610557542
Chr3	2781930	2782037	Chr3_2781930_2782037_-	7.0	35.0	0	3.5	3.5	0.6020599913279624	0.6020599913279624
Chr3	2856181	2856433	Chr3_2856181_2856433_-	0.0	43.0	1	0.0	0.0	-0.3010299956639812	-0.3010299956639812
Chr3	2856454	2856617	Chr3_2856454_2856617_+	0.0	43.0	1	0.0	0.0	-0.3010299956639812	-0.3010299956639812
Chr3	2857324	2857536	Chr3_2857324_2857536_+	0.0	43.0	1	0.0	0.0	-0.3010299956639812	-0.3010299956639812
Chr3	2858221	2858428	Chr3_2858221_2858428_-	0.0	43.0	1	7.0	0.0	0.8750612633917001	-0.3010299956639812
Chr3	2953025	2953364	Chr3_2953025_2953364_-	0.0	43.0	0	0.0	0.0	-0.3010299956639812	-0.3010299956639812
Chr3	2953772	2953959	Chr3_2953772_2953959_-	0.0	43.0	0	0.0	0.0	-0.3010299956639812	-0.3010299956639812
Chr3	2972704	2972891	Chr3_2972704_2972891_-	0.0	43.0	0	0.0	0.0	-0.3010299956639812	-0.3010299956639812
Chr3	2975677	2975807	Chr3_2975677_2975807_-	0.0	43.0	0	0.0	0.0	-0.3010299956639812	-0.3010299956639812
Chr3	3067410	3068147	Chr3_3067410_3068147_-	0.0	43.0	0	1.25	0.5	0.24303804868629444	0.0
Chr3	3090030	3090289	Chr3_3090030_3090289_+	0.0	43.0	0	2.0	2.0	0.3979400086720376	0.3979400086720376
Chr3	3164962	3165162	Chr3_3164962_3165162_+	0.0	43.0	0	0.0	0.0	-0.3010299956639812	-0.3010299956639812
Chr3	3255125	3255275	Chr3_3255125_3255275_+	0.0	43.0	0	0.0	0.0	-0.3010299956639812	-0.3010299956639812
Chr3	3255620	3256402	Chr3_3255620_3256402_+	0.0	43.0	0	0.0	0.0	-0.3010299956639812	-0.3010299956639812
Chr3	3350700	3350883	Chr3_3350700_3350883_+	0.0	43.0	0	0.0	0.0	-0.3010299956639812	-0.3010299956639812
Chr3	3350947	3351158	Chr3_3350947_3351158_+	12.0	30.0	0	4.0	0.0	0.6532125137753437	-0.3010299956639812
Chr3	3351159	3351329	Chr3_3351159_3351329_+	0.0	43.0	0	0.0	0.0	-0.3010299956639812	-0.3010299956639812
Chr3	3351384	3351566	Chr3_3351384_3351566_-	0.0	43.0	0	0.0	0.0	-0.3010299956639812	-0.3010299956639812
Chr3	3602323	3608196	Chr3_3602323_3608196_+	1.0	41.0	0	16.033898305084747	17.0	1.2183752620883928	1.2430380486862944
Chr3	3614318	3614545	Chr3_3614318_3614545_-	0.0	43.0	0	0.3333333333333333	0.0	-0.07918124604762487	-0.3010299956639812
Chr3	3615872	3616143	Chr3_3615872_3616143_+	0.0	43.0	0	0.0	0.0	-0.3010299956639812	-0.3010299956639812
Chr3	3619702	3619982	Chr3_3619702_3619982_+	12.0	30.0	0	7.666666666666667	11.0	0.9120448296448701	1.0606978403536116
Chr3	3623223	3623432	Chr3_3623223_3623432_+	0.0	43.0	0	0.0	0.0	-0.3010299956639812	-0.3010299956639812
Chr3	3627413	3627625	Chr3_3627413_3627625_+	0.0	43.0	0	0.0	0.0	-0.3010299956639812	-0.3010299956639812
Chr3	3736830	3737088	Chr3_3736830_3737088_-	0.0	43.0	0	1.6666666666666667	2.0	0.3357921019231932	0.3979400086720376
Chr3	3747318	3747585	Chr3_3747318_3747585_+	5.0	37.0	0	5.333333333333333	5.0	0.7659167939666319	0.7403626894942439
Chr3	3749288	3749932	Chr3_3749288_3749932_-	12.0	30.0	0	3.375	2.0	0.5882717068423291	0.3979400086720376
Chr3	3750484	3750722	Chr3_3750484_3750722_+	15.0	27.0	1	13.25	13.0	1.1383026981662814	1.130333768495006
Chr3	3754679	3754973	Chr3_3754679_3754973_-	12.0	30.0	1	6.5	7.0	0.8450980400142568	0.8750612633917001
Chr3	3785230	3785409	Chr3_3785230_3785409_-	0.0	43.0	0	0.0	0.0	-0.3010299956639812	-0.3010299956639812
Chr3	3886704	3886870	Chr3_3886704_3886870_+	0.0	43.0	0	0.0	0.0	-0.3010299956639812	-0.3010299956639812
Chr3	3899450	3899656	Chr3_3899450_3899656_-	0.0	43.0	0	0.0	0.0	-0.3010299956639812	-0.3010299956639812
Chr3	3909812	3910043	Chr3_3909812_3910043_+	0.0	43.0	0	0.0	0.0	-0.3010299956639812	-0.3010299956639812
Chr3	3914786	3915001	Chr3_3914786_3915001_-	0.0	43.0	1	0.0	0.0	-0.3010299956639812	-0.3010299956639812
Chr3	3973615	3973997	Chr3_3973615_3973997_-	0.0	43.0	0	0.0	0.0	-0.3010299956639812	-0.3010299956639812
Chr3	4043326	4043635	Chr3_4043326_4043635_+	0.0	43.0	0	0.0	0.0	-0.3010299956639812	-0.3010299956639812
Chr3	4152495	4152765	Chr3_4152495_4152765_+	0.0	43.0	1	0.0	0.0	-0.3010299956639812	-0.3010299956639812
Chr3	4155005	4155437	Chr3_4155005_4155437_+	3.0	39.0	1	9.4	3.0	0.9956351945975499	0.5440680443502757
Chr3	4168067	4168539	Chr3_4168067_4168539_-	18.0	24.0	1	27.333333333333332	27.5	1.4445652207639397	1.4471580313422192
Chr4	2112	2572	Chr4_2112_2572_+	19.0	23.0	1	26.4	27.0	1.429752280002408	1.4393326938302626
Chr4	68838	68978	Chr4_68838_68978_+	0.0	43.0	0	0.0	0.0	-0.3010299956639812	-0.3010299956639812
Chr4	184371	184557	Chr4_184371_184557_-	0.0	43.0	0	0.0	0.0	-0.3010299956639812	-0.3010299956639812
Chr4	280229	280421	Chr4_280229_280421_+	0.0	43.0	1	0.0	0.0	-0.3010299956639812	-0.3010299956639812
Chr4	284765	284893	Chr4_284765_284893_+	0.0	43.0	1	0.0	0.0	-0.3010299956639812	-0.3010299956639812
Chr4	284974	285093	Chr4_284974_285093_+	0.0	43.0	1	0.0	0.0	-0.3010299956639812	-0.3010299956639812
Chr4	295688	295855	Chr4_295688_295855_+	0.0	43.0	1	0.0	0.0	-0.3010299956639812	-0.3010299956639812
Chr4	347299	347424	Chr4_347299_347424_-	0.0	43.0	0	0.0	0.0	-0.3010299956639812	-0.3010299956639812
Chr4	382871	382986	Chr4_382871_382986_-	0.0	43.0	0	0.0	0.0	-0.3010299956639812	-0.3010299956639812
Chr4	408727	408906	Chr4_408727_408906_+	0.0	43.0	0	0.0	0.0	-0.3010299956639812	-0.3010299956639812
Chr4	493872	493998	Chr4_493872_493998_+	0.0	43.0	0	0.0	0.0	-0.3010299956639812	-0.3010299956639812
Chr4	529538	529712	Chr4_529538_529712_+	0.0	43.0	0	0.0	0.0	-0.3010299956639812	-0.3010299956639812
Chr4	574905	575062	Chr4_574905_575062_-	4.0	38.0	0	4.0	4.0	0.6532125137753437	0.6532125137753437
Chr4	581483	581667	Chr4_581483_581667_-	0.0	43.0	1	2.6666666666666665	0.0	0.5006023505691853	-0.3010299956639812
Chr4	582177	582355	Chr4_582177_582355_+	0.0	43.0	1	0.0	0.0	-0.3010299956639812	-0.3010299956639812
Chr4	604086	604248	Chr4_604086_604248_-	0.0	43.0	0	3.0	1.0	0.5440680443502757	0.17609125905568124
Chr4	605609	605820	Chr4_605609_605820_-	8.0	34.0	0	5.333333333333333	8.0	0.7659167939666319	0.9294189257142927
Chr4	687127	687353	Chr4_687127_687353_+	5.0	37.0	0	13.0	7.0	1.130333768495006	0.8750612633917001
Chr4	700642	701196	Chr4_700642_701196_+	0.0	43.0	0	0.0	0.0	-0.3010299956639812	-0.3010299956639812
Chr4	775655	775811	Chr4_775655_775811_-	0.0	43.0	0	0.0	0.0	-0.3010299956639812	-0.3010299956639812
Chr4	775864	776067	Chr4_775864_776067_+	0.0	43.0	0	0.0	0.0	-0.3010299956639812	-0.3010299956639812
Chr4	776075	776226	Chr4_776075_776226_-	0.0	43.0	0	0.0	0.0	-0.3010299956639812	-0.3010299956639812
Chr4	782643	782766	Chr4_782643_782766_-	0.0	43.0	0	0.0	0.0	-0.3010299956639812	-0.3010299956639812
Chr4	798012	798201	Chr4_798012_798201_-	0.0	43.0	0	0.0	0.0	-0.3010299956639812	-0.3010299956639812
Chr4	840303	843199	Chr4_840303_843199_+	1.0	41.0	0	23.20689655172414	23.0	1.3748747046033443	1.3710678622717363
Chr4	843199	850026	Chr4_843199_850026_+	25.0	17.0	0	21.228571428571428	21.0	1.3370311740387415	1.3324384599156054
Chr4	850026	854644	Chr4_850026_854644_+	12.0	30.0	0	26.425531914893618	27.0	1.4301642915585555	1.4393326938302626
Chr4	876328	876538	Chr4_876328_876538_-	0.0	43.0	0	0.0	0.0	-0.3010299956639812	-0.3010299956639812
Chr4	877260	885264	Chr4_877260_885264_-	0.0	43.0	0	25.320987654320987	26.0	1.4119728500379993	1.423245873936808
Chr4	877762	878238	Chr4_877762_878238_-	11.0	31.0	0	14.166666666666666	13.5	1.166331421766525	1.146128035678238
Chr4	908673	908826	Chr4_908673_908826_+	0.0	43.0	0	1.6666666666666667	1.0	0.3357921019231932	0.17609125905568124
Chr4	937389	937496	Chr4_937389_937496_-	0.0	43.0	1	0.0	0.0	-0.3010299956639812	-0.3010299956639812
Chr4	940347	943682	Chr4_940347_943682_-	15.0	27.0	1	22.029411764705884	21.0	1.3527498525903487	1.3324384599156054
Chr4	943655	946099	Chr4_943655_946099_-	11.0	31.0	1	12.28	11.0	1.1065308538223813	1.0606978403536116
Chr4	956458	956675	Chr4_956458_956675_+	4.0	38.0	1	6.0	6.0	0.8129133566428556	0.8129133566428556
Chr4	957264	961042	Chr4_957264_961042_+	11.0	31.0	1	5.589743589743589	3.0	0.7845990069343861	0.5440680443502757
Chr4	961039	962471	Chr4_961039_962471_+	20.0	22.0	1	8.6	6.0	0.9590413923210935	0.8129133566428556
Chr4	965088	966705	Chr4_965088_966705_+	19.0	23.0	1	14.055555555555555	14.0	1.1630287862164395	1.1613680022349748
Chr4	966742	967424	Chr4_966742_967424_+	25.0	17.0	1	17.875	15.0	1.2642273477562325	1.1903316981702914
Chr4	968122	971419	Chr4_968122_971419_+	6.0	36.0	1	4.176470588235294	4.0	0.6699182072781964	0.6532125137753437
Chr4	971454	971817	Chr4_971454_971817_+	4.0	38.0	1	4.0	4.0	0.6532125137753437	0.6532125137753437
Chr4	978020	982014	Chr4_978020_982014_+	7.0	35.0	1	7.926829268292683	7.0	0.9256641949904817	0.8750612633917001
Chr4	982031	986774	Chr4_982031_986774_+	9.0	33.0	1	8.729166666666666	10.0	0.9651624888474823	1.021189299069938
Chr4	1017022	1022938	Chr4_1017022_1022938_+	22.0	20.0	0	31.366666666666667	32.0	1.5033366375564376	1.5118833609788744
Chr4	1037301	1037850	Chr4_1037301_1037850_-	12.0	30.0	1	18.666666666666668	18.5	1.2825465899699682	1.2787536009528289
Chr4	1037879	1038439	Chr4_1037879_1038439_-	23.0	19.0	1	28.857142857142858	31.0	1.467713786197831	1.4983105537896004
Chr4	1039130	1039824	Chr4_1039130_1039824_-	28.0	14.0	1	30.75	31.5	1.494850021680094	1.505149978319906
Chr4	1039798	1040838	Chr4_1039798_1040838_-	32.0	10.0	1	30.916666666666668	31.0	1.4971601041581681	1.4983105537896004
Chr4	1041249	1041361	Chr4_1041249_1041361_-	32.0	10.0	1	32.0	32.0	1.5118833609788744	1.5118833609788744
Chr4	1059778	1059946	Chr4_1059778_1059946_+	32.0	10.0	1	32.0	32.0	1.5118833609788744	1.5118833609788744
Chr4	1064465	1064607	Chr4_1064465_1064607_-	29.0	13.0	1	30.333333333333332	30.0	1.48902047801937	1.4842998393467859
Chr4	1074434	1074714	Chr4_1074434_1074714_+	30.0	12.0	1	30.5	30.0	1.4913616938342726	1.4842998393467859
Chr4	1074837	1075094	Chr4_1074837_1075094_-	32.0	10.0	1	30.666666666666668	30.0	1.4936903561528554	1.4842998393467859
Chr4	1100494	1100659	Chr4_1100494_1100659_-	30.0	12.0	1	29.333333333333332	29.0	1.4747017805962495	1.469822015978163
Chr4	1107064	1108926	Chr4_1107064_1108926_-	29.0	13.0	1	29.25	29.0	1.4734869700645683	1.469822015978163
Chr4	1116395	1117100	Chr4_1116395_1117100_+	22.0	20.0	1	24.375	22.5	1.395763089417763	1.3617278360175928
Chr4	1118466	1119917	Chr4_1118466_1119917_+	22.0	20.0	1	15.1875	12.0	1.1955537388251134	1.0969100130080565
Chr4	1125652	1125756	Chr4_1125652_1125756_+	22.0	20.0	1	22.0	22.0	1.3521825181113625	1.3521825181113625
Chr4	1129336	1129912	Chr4_1129336_1129912_-	18.0	24.0	1	18.714285714285715	16.0	1.2836242443241699	1.2174839442139063
Chr4	1131791	1132050	Chr4_1131791_1132050_-	34.0	8.0	1	34.0	34.0	1.5378190950732742	1.5378190950732742
Chr4	1135516	1135848	Chr4_1135516_1135848_+	30.0	12.0	1	29.5	29.5	1.4771212547196624	1.4771212547196624
Chr4	1136574	1136785	Chr4_1136574_1136785_+	29.0	13.0	1	29.0	29.0	1.469822015978163	1.469822015978163
Chr4	1143359	1143598	Chr4_1143359_1143598_-	29.0	13.0	1	29.0	29.0	1.469822015978163	1.469822015978163
Chr4	1144043	1144910	Chr4_1144043_1144910_+	21.0	21.0	1	23.0	23.5	1.3710678622717363	1.380211241711606
Chr4	1155758	1155965	Chr4_1155758_1155965_+	29.0	13.0	1	25.0	29.0	1.4065401804339552	1.469822015978163
Chr4	1163670	1165289	Chr4_1163670_1165289_-	16.0	26.0	1	26.58823529411765	28.0	1.4327807131545938	1.4548448600085102
Chr4	1169436	1169912	Chr4_1169436_1169912_-	29.0	13.0	1	29.0	29.0	1.469822015978163	1.469822015978163
Chr4	1171201	1171738	Chr4_1171201_1171738_+	29.0	13.0	1	29.166666666666668	29.0	1.4722687519252504	1.469822015978163
Chr4	1172646	1173082	Chr4_1172646_1173082_-	29.0	13.0	1	25.4	29.0	1.413299764081252	1.469822015978163
Chr4	1173232	1175094	Chr4_1173232_1175094_-	29.0	13.0	1	29.05263157894737	29.0	1.4705961596446477	1.469822015978163
Chr4	1178568	1179035	Chr4_1178568_1179035_+	29.0	13.0	1	21.666666666666668	23.5	1.3457003905834422	1.380211241711606
Chr4	1180593	1180863	Chr4_1180593_1180863_+	26.0	16.0	1	18.25	17.5	1.2730012720637376	1.255272505103306
Chr4	1180884	1181023	Chr4_1180884_1181023_+	12.0	30.0	1	9.333333333333334	8.0	0.9927007612585006	0.9294189257142927
Chr4	1181509	1181854	Chr4_1181509_1181854_+	14.0	28.0	1	10.25	10.5	1.0314084642516241	1.0413926851582251
Chr4	1182369	1183836	Chr4_1182369_1183836_+	16.0	26.0	1	16.0	16.0	1.2174839442139063	1.2174839442139063
Chr4	1186767	1186907	Chr4_1186767_1186907_+	32.0	10.0	1	32.0	32.0	1.5118833609788744	1.5118833609788744
Chr4	1187086	1188152	Chr4_1187086_1188152_+	32.0	10.0	1	24.5	30.0	1.3979400086720377	1.4842998393467859
Chr4	1188126	1188810	Chr4_1188126_1188810_+	7.0	35.0	1	10.125	8.0	1.026328938722349	0.9294189257142927
Chr4	1189506	1190696	Chr4_1189506_1190696_+	21.0	21.0	1	15.5	14.0	1.2041199826559248	1.1613680022349748
Chr4	1190696	1196569	Chr4_1190696_1196569_-	22.0	20.0	1	15.45	15.5	1.2027606873932	1.2041199826559248
Chr4	1196571	1196797	Chr4_1196571_1196797_-	23.0	19.0	1	23.666666666666668	23.0	1.3832167518513312	1.3710678622717363
Chr4	1206925	1208998	Chr4_1206925_1208998_+	5.0	37.0	1	4.666666666666667	5.0	0.7132104434506291	0.7403626894942439
Chr4	1209077	1210197	Chr4_1209077_1210197_-	5.0	37.0	1	5.666666666666667	5.0	0.7900504736833514	0.7403626894942439
Chr4	1233088	1234818	Chr4_1233088_1234818_+	2.0	40.0	1	2.0	2.0	0.3979400086720376	0.3979400086720376
Chr4	1236437	1236617	Chr4_1236437_1236617_-	3.0	39.0	1	3.0	3.0	0.5440680443502757	0.5440680443502757
Chr4	1236711	1236853	Chr4_1236711_1236853_+	3.0	39.0	1	3.0	3.0	0.5440680443502757	0.5440680443502757
Chr4	1240541	1242099	Chr4_1240541_1242099_-	14.0	28.0	1	14.875	15.0	1.1868151244474543	1.1903316981702914
Chr4	1245251	1250086	Chr4_1245251_1250086_-	12.0	30.0	1	8.63265306122449	8.0	0.9605969596234171	0.9294189257142927
Chr4	1269209	1269377	Chr4_1269209_1269377_-	10.0	32.0	1	10.0	10.0	1.021189299069938	1.021189299069938
Chr4	1272038	1274053	Chr4_1272038_1274053_-	10.0	32.0	1	9.904761904761905	10.0	1.0172321465725214	1.021189299069938
Chr4	1284786	1284998	Chr4_1284786_1284998_-	9.0	33.0	1	12.333333333333334	14.0	1.1083394747888382	1.1613680022349748
Chr4	1290081	1290200	Chr4_1290081_1290200_-	13.0	29.0	1	12.5	12.5	1.1139433523068367	1.1139433523068367
Chr4	1311805	1312341	Chr4_1311805_1312341_+	15.0	27.0	1	15.0	15.0	1.1903316981702914	1.1903316981702914
Chr4	1312500	1312685	Chr4_1312500_1312685_+	15.0	27.0	1	15.0	15.0	1.1903316981702914	1.1903316981702914
Chr4	1312786	1312935	Chr4_1312786_1312935_+	15.0	27.0	1	15.0	15.0	1.1903316981702914	1.1903316981702914
Chr4	1313103	1313237	Chr4_1313103_1313237_+	15.0	27.0	1	15.0	15.0	1.1903316981702914	1.1903316981702914
Chr4	1317144	1317526	Chr4_1317144_1317526_-	15.0	27.0	1	15.0	15.0	1.1903316981702914	1.1903316981702914
Chr4	1318096	1318275	Chr4_1318096_1318275_+	15.0	27.0	1	15.0	15.0	1.1903316981702914	1.1903316981702914
Chr4	1327135	1327335	Chr4_1327135_1327335_-	15.0	27.0	1	15.0	15.0	1.1903316981702914	1.1903316981702914
Chr4	1336044	1337906	Chr4_1336044_1337906_-	15.0	27.0	1	28.1	29.0	1.4563660331290431	1.469822015978163
Chr4	1339113	1341487	Chr4_1339113_1341487_+	15.0	27.0	1	15.0	15.0	1.1903316981702914	1.1903316981702914
Chr4	1341461	1344791	Chr4_1341461_1344791_+	15.0	27.0	1	15.0	15.0	1.1903316981702914	1.1903316981702914
Chr4	1346968	1347082	Chr4_1346968_1347082_-	15.0	27.0	1	15.0	15.0	1.1903316981702914	1.1903316981702914
Chr4	1347082	1347291	Chr4_1347082_1347291_-	15.0	27.0	1	15.0	15.0	1.1903316981702914	1.1903316981702914
Chr4	1347387	1348931	Chr4_1347387_1348931_-	15.0	27.0	1	15.0	15.0	1.1903316981702914	1.1903316981702914
Chr4	1348949	1352261	Chr4_1348949_1352261_-	15.0	27.0	1	15.0	15.0	1.1903316981702914	1.1903316981702914
Chr4	1354034	1359950	Chr4_1354034_1359950_+	25.0	17.0	1	31.6	32.0	1.506505032404872	1.5118833609788744
Chr4	1363333	1366672	Chr4_1363333_1366672_-	3.0	39.0	1	5.705882352941177	3.0	0.7928035382554376	0.5440680443502757
Chr4	1366645	1369083	Chr4_1366645_1369083_-	12.0	30.0	1	8.08	10.0	0.9334872878487055	1.021189299069938
Chr4	1379445	1379662	Chr4_1379445_1379662_+	3.0	39.0	1	3.3333333333333335	3.0	0.5835765856339493	0.5440680443502757
Chr4	1380280	1384059	Chr4_1380280_1384059_+	3.0	39.0	1	5.3076923076923075	4.0	0.7640035993223515	0.6532125137753437
Chr4	1384056	1385498	Chr4_1384056_1385498_+	17.0	25.0	1	9.533333333333333	6.0	1.001445240874181	0.8129133566428556
Chr4	1388135	1389763	Chr4_1388135_1389763_+	6.0	36.0	1	8.176470588235293	7.0	0.9383430989359078	0.8750612633917001
Chr4	1389822	1390496	Chr4_1389822_1390496_+	11.0	31.0	1	5.428571428571429	4.0	0.7729500566978359	0.6532125137753437
Chr4	1391197	1393876	Chr4_1391197_1393876_+	5.0	37.0	1	4.571428571428571	4.0	0.7051303130408373	0.6532125137753437
Chr4	1397907	1398557	Chr4_1397907_1398557_-	8.0	34.0	1	8.0	8.0	0.9294189257142927	0.9294189257142927
Chr4	1398547	1398840	Chr4_1398547_1398840_-	8.0	34.0	1	8.0	8.0	0.9294189257142927	0.9294189257142927
Chr4	1398852	1399775	Chr4_1398852_1399775_-	8.0	34.0	1	8.0	8.0	0.9294189257142927	0.9294189257142927
Chr4	1402550	1402791	Chr4_1402550_1402791_+	8.0	34.0	1	9.666666666666666	8.0	1.0071785846271233	0.9294189257142927
Chr4	1410836	1411301	Chr4_1410836_1411301_+	8.0	34.0	1	8.5	8.0	0.9542425094393249	0.9294189257142927
Chr4	1428385	1434945	Chr4_1428385_1434945_-	16.0	26.0	1	9.940298507462687	8.0	1.01871291612702	0.9294189257142927
Chr4	1437398	1439286	Chr4_1437398_1439286_+	7.0	35.0	1	6.9	7.0	0.8692317197309762	0.8750612633917001
Chr4	1443031	1446044	Chr4_1443031_1446044_-	7.0	35.0	1	8.03225806451613	7.0	0.9310639825369319	0.8750612633917001
Chr4	1446097	1446726	Chr4_1446097_1446726_-	13.0	29.0	1	10.625	10.5	1.0463000196529693	1.0413926851582251
Chr4	1447422	1448106	Chr4_1447422_1448106_-	6.0	36.0	1	6.125	6.0	0.8211858826088455	0.8129133566428556
Chr4	1448116	1449138	Chr4_1448116_1449138_-	7.0	35.0	1	7.181818181818182	7.0	0.8854640237914673	0.8750612633917001
Chr4	1449331	1449512	Chr4_1449331_1449512_-	6.0	36.0	1	6.333333333333333	6.0	0.8346326063360918	0.8129133566428556
Chr4	1449570	1449694	Chr4_1449570_1449694_-	7.0	35.0	1	6.5	6.5	0.8450980400142568	0.8450980400142568
Chr4	1452427	1453769	Chr4_1452427_1453769_-	7.0	35.0	1	8.714285714285714	8.5	0.964461674621011	0.9542425094393249
Chr4	1454409	1454754	Chr4_1454409_1454754_-	7.0	35.0	1	10.25	10.5	1.0314084642516241	1.0413926851582251
Chr4	1455242	1455381	Chr4_1455242_1455381_-	8.0	34.0	1	7.5	7.5	0.9030899869919435	0.9030899869919435
Chr4	1455402	1457798	Chr4_1455402_1457798_-	7.0	35.0	1	9.25	7.0	0.9890046156985368	0.8750612633917001
Chr4	1459197	1459466	Chr4_1459197_1459466_-	11.0	31.0	1	14.0	14.0	1.1613680022349748	1.1613680022349748
Chr4	1459665	1460169	Chr4_1459665_1460169_-	17.0	25.0	1	17.0	17.0	1.2430380486862944	1.2430380486862944
Chr4	1471223	1471410	Chr4_1471223_1471410_-	7.0	35.0	1	6.333333333333333	6.0	0.8346326063360918	0.8129133566428556
Chr4	1471418	1473871	Chr4_1471418_1473871_+	6.0	36.0	1	16.04	18.0	1.2185355052165279	1.2671717284030137
Chr4	1473844	1477182	Chr4_1473844_1477182_+	18.0	24.0	1	12.823529411764707	10.0	1.1246192849705767	1.021189299069938
Chr4	1512585	1512782	Chr4_1512585_1512782_-	0.0	43.0	1	0.0	0.0	-0.3010299956639812	-0.3010299956639812
Chr4	1873220	1874414	Chr4_1873220_1874414_+	0.0	43.0	0	13.384615384615385	16.0	1.14253385393484	1.2174839442139063
Chr4	1874610	1874807	Chr4_1874610_1874807_-	0.0	43.0	0	0.0	0.0	-0.3010299956639812	-0.3010299956639812
Chr4	2293762	2293892	Chr4_2293762_2293892_+	0.0	43.0	0	0.0	0.0	-0.3010299956639812	-0.3010299956639812
Chr4	2312003	2312126	Chr4_2312003_2312126_+	0.0	43.0	0	0.0	0.0	-0.3010299956639812	-0.3010299956639812
Chr4	2319097	2319733	Chr4_2319097_2319733_-	5.0	37.0	0	7.375	9.0	0.8962505624616381	0.9777236052888477
Chr4	2319733	2321887	Chr4_2319733_2321887_+	9.0	33.0	0	15.409090909090908	15.0	1.2016453635280693	1.1903316981702914
Chr4	2321894	2325098	Chr4_2321894_2325098_+	20.0	22.0	0	18.90909090909091	19.0	1.2880051942028177	1.290034611362518
Chr4	2325098	2330021	Chr4_2325098_2330021_+	22.0	20.0	0	18.50980392156863	18.0	1.2789776373167878	1.2671717284030137
Chr4	2330021	2330331	Chr4_2330021_2330331_+	15.0	27.0	0	18.75	19.5	1.2844307338445196	1.3010299956639813
Chr4	2330933	2335514	Chr4_2330933_2335514_+	18.0	24.0	0	19.319148936170212	19.0	1.297085001296544	1.290034611362518
Chr4	2335529	2336424	Chr4_2335529_2336424_+	23.0	19.0	0	16.2	17.0	1.2227164711475833	1.2430380486862944
Chr4	2336260	2339245	Chr4_2336260_2339245_+	13.0	29.0	0	9.612903225806452	7.0	1.0048758513324625	0.8750612633917001
Chr4	2339249	2339894	Chr4_2339249_2339894_-	10.0	32.0	0	9.571428571428571	8.0	1.003091076977142	0.9294189257142927
Chr4	2340424	2340604	Chr4_2340424_2340604_+	17.0	25.0	0	15.0	14.0	1.1903316981702914	1.1613680022349748
Chr4	2356985	2357197	Chr4_2356985_2357197_-	0.0	43.0	0	2.0	1.0	0.3979400086720376	0.17609125905568124
Chr4	2377928	2378111	Chr4_2377928_2378111_-	0.0	43.0	0	0.0	0.0	-0.3010299956639812	-0.3010299956639812
Chr4	2462849	2463049	Chr4_2462849_2463049_+	0.0	43.0	0	0.0	0.0	-0.3010299956639812	-0.3010299956639812
Chr4	2536310	2537214	Chr4_2536310_2537214_-	7.0	35.0	0	7.0	7.0	0.8750612633917001	0.8750612633917001
Chr4	2557818	2557933	Chr4_2557818_2557933_+	0.0	43.0	0	0.0	0.0	-0.3010299956639812	-0.3010299956639812
Chr4	2884653	2885602	Chr4_2884653_2885602_-	22.0	20.0	0	30.0	31.0	1.4842998393467859	1.4983105537896004
Chr4	2885602	2885786	Chr4_2885602_2885786_+	24.0	18.0	0	25.5	25.5	1.414973347970818	1.414973347970818
Chr4	2885786	2904530	Chr4_2885786_2904530_+	27.0	15.0	0	20.084656084656086	23.0	1.3135436154780855	1.3710678622717363
Chr4	2887810	2888445	Chr4_2887810_2888445_-	1.0	41.0	0	6.428571428571429	4.0	0.8406436985880068	0.6532125137753437
Chr4	2888445	2890628	Chr4_2888445_2890628_+	21.0	21.0	0	16.0	17.0	1.2174839442139063	1.2430380486862944
Chr4	2888858	2889625	Chr4_2888858_2889625_-	17.0	25.0	0	9.333333333333334	9.0	0.9927007612585006	0.9777236052888477
Chr4	2890698	2891399	Chr4_2890698_2891399_+	26.0	16.0	0	23.5	27.5	1.380211241711606	1.4471580313422192
Chr4	2891397	2897924	Chr4_2891397_2897924_+	29.0	13.0	0	25.80597014925373	28.0	1.42005432296261	1.4548448600085102
Chr4	2897924	2900840	Chr4_2897924_2900840_+	22.0	20.0	0	9.4	10.0	0.9956351945975499	1.021189299069938
Chr4	2900877	2901515	Chr4_2900877_2901515_-	3.0	39.0	0	7.0	3.0	0.8750612633917001	0.5440680443502757
Chr4	2904530	2912101	Chr4_2904530_2912101_+	17.0	25.0	0	29.01298701298701	32.0	1.4700131667215233	1.5118833609788744
Chr4	2912101	2922761	Chr4_2912101_2922761_+	15.0	27.0	0	27.214953271028037	28.0	1.4427141506841439	1.4548448600085102
Chr4	2913017	2920587	Chr4_2913017_2920587_-	21.0	21.0	0	29.06578947368421	31.0	1.4707894801383374	1.4983105537896004
Chr4	2922761	2930332	Chr4_2922761_2930332_+	29.0	13.0	0	24.155844155844157	26.0	1.3919198763033342	1.423245873936808
Chr4	2930332	2930997	Chr4_2930332_2930997_+	22.0	20.0	0	26.142857142857142	27.0	1.4255807961304496	1.4393326938302626
Chr4	2930997	2938567	Chr4_2930997_2938567_-	27.0	15.0	0	29.83116883116883	30.0	1.4818891464513197	1.4842998393467859
Chr4	2938567	2941284	Chr4_2938567_2941284_+	26.0	16.0	0	28.428571428571427	30.5	1.4613269875364305	1.4913616938342726
Chr4	2941268	2948837	Chr4_2941268_2948837_+	2.0	40.0	0	19.948051948051948	23.0	1.3106519398000809	1.3710678622717363
Chr4	2948885	2953002	Chr4_2948885_2953002_+	8.0	34.0	0	27.046511627906977	29.0	1.4400666094791974	1.469822015978163
Chr4	2953002	2958563	Chr4_2953002_2958563_-	31.0	11.0	0	27.517857142857142	29.0	1.4474349165807363	1.469822015978163
Chr4	2958563	2961803	Chr4_2958563_2961803_-	16.0	26.0	0	31.0	31.0	1.4983105537896004	1.4983105537896004
Chr4	2961805	2965224	Chr4_2961805_2965224_-	24.0	18.0	0	19.228571428571428	19.0	1.2950956385643744	1.290034611362518
Chr4	2965249	2966856	Chr4_2965249_2966856_-	28.0	14.0	0	27.11764705882353	27.0	1.4411866752238558	1.4393326938302626
Chr4	2966856	2976777	Chr4_2966856_2976777_+	25.0	17.0	0	20.76	21.0	1.327563260187278	1.3324384599156054
Chr4	2974279	2974755	Chr4_2974279_2974755_+	18.0	24.0	0	16.333333333333332	16.5	1.226170123398999	1.2304489213782739
Chr4	2976777	2986718	Chr4_2976777_2986718_-	27.0	15.0	0	23.22772277227723	24.0	1.3752560595451642	1.3891660843645324
Chr4	2986718	2987039	Chr4_2986718_2987039_+	24.0	18.0	0	20.5	19.5	1.3222192947339193	1.3010299956639813
Chr4	2987041	2993011	Chr4_2987041_2993011_-	28.0	14.0	0	22.065573770491802	22.0	1.353446380718582	1.3521825181113625
Chr4	2993011	2996969	Chr4_2993011_2996969_+	26.0	16.0	0	27.9	30.0	1.4533183400470377	1.4842998393467859
Chr4	2993089	2994951	Chr4_2993089_2994951_+	26.0	16.0	0	31.7	32.0	1.507855871695831	1.5118833609788744
Chr4	2997068	3001864	Chr4_2997068_3001864_+	9.0	33.0	0	22.163265306122447	22.0	1.3553224828559791	1.3521825181113625
Chr4	3001864	3008673	Chr4_3001864_3008673_-	13.0	29.0	0	12.36231884057971	13.0	1.1093192709898765	1.130333768495006
Chr4	3008673	3010655	Chr4_3008673_3010655_+	6.0	36.0	0	22.666666666666668	23.0	1.3648635498704516	1.3710678622717363
Chr4	3010655	3015887	Chr4_3010655_3015887_+	27.0	15.0	0	29.150943396226417	32.0	1.4720385157528098	1.5118833609788744
Chr4	3015887	3017960	Chr4_3015887_3017960_+	12.0	30.0	0	30.636363636363637	31.5	1.4932678906702193	1.505149978319906
Chr4	3018093	3018252	Chr4_3018093_3018252_+	25.0	17.0	0	29.333333333333332	29.0	1.4747017805962495	1.469822015978163
Chr4	3018252	3019564	Chr4_3018252_3019564_+	34.0	8.0	0	20.071428571428573	20.5	1.3132644520809929	1.3222192947339193
Chr4	3019563	3019711	Chr4_3019563_3019711_+	14.0	28.0	0	18.666666666666668	16.0	1.2825465899699682	1.2174839442139063
Chr4	3019810	3028811	Chr4_3019810_3028811_+	20.0	22.0	0	21.54945054945055	22.0	1.343397771748764	1.3521825181113625
Chr4	3020438	3028009	Chr4_3020438_3028009_+	19.0	23.0	0	21.792207792207794	22.0	1.3481530825892871	1.3521825181113625
Chr4	3028867	3032851	Chr4_3028867_3032851_+	14.0	28.0	0	21.024390243902438	22.0	1.3329308573401246	1.3521825181113625
Chr4	3032065	3032732	Chr4_3032065_3032732_-	30.0	12.0	0	13.875	9.5	1.157607853361668	1.0
Chr4	3032851	3036212	Chr4_3032851_3036212_+	11.0	31.0	0	23.285714285714285	24.0	1.3763161978280818	1.3891660843645324
Chr4	3036215	3037108	Chr4_3036215_3037108_+	24.0	18.0	0	19.6	19.0	1.3031960574204888	1.290034611362518
Chr4	3037108	3038495	Chr4_3037108_3038495_-	18.0	24.0	0	21.857142857142858	24.0	1.3494163018682104	1.3891660843645324
Chr4	3038495	3045670	Chr4_3038495_3045670_-	20.0	22.0	0	20.65753424657534	20.0	1.3254650525170135	1.3117538610557542
Chr4	3045670	3052253	Chr4_3045670_3052253_-	27.0	15.0	0	22.895522388059703	24.0	1.3691327468019276	1.3891660843645324
Chr4	3052253	3052590	Chr4_3052253_3052590_+	9.0	33.0	0	12.25	9.0	1.105510184769974	0.9777236052888477
Chr4	3052593	3052928	Chr4_3052593_3052928_-	24.0	18.0	0	34.2	35.0	1.5403294747908738	1.550228353055094
Chr4	3053012	3053153	Chr4_3053012_3053153_-	29.0	13.0	0	25.0	25.0	1.4065401804339552	1.4065401804339552
Chr4	3053153	3070431	Chr4_3053153_3070431_-	21.0	21.0	0	23.729885057471265	24.0	1.3843513539218906	1.3891660843645324
Chr4	3062351	3069920	Chr4_3062351_3069920_+	15.0	27.0	0	27.12987012987013	28.0	1.4413788435841437	1.4548448600085102
Chr4	3070431	3070931	Chr4_3070431_3070931_-	4.0	38.0	0	1.8333333333333333	2.0	0.3679767852945943	0.3979400086720376
Chr4	3070931	3071191	Chr4_3070931_3071191_-	2.0	40.0	0	7.0	8.0	0.8750612633917001	0.9294189257142927
Chr4	3264955	3265112	Chr4_3264955_3265112_+	0.0	43.0	1	0.0	0.0	-0.3010299956639812	-0.3010299956639812
Chr4	3265095	3265277	Chr4_3265095_3265277_+	0.0	43.0	1	0.0	0.0	-0.3010299956639812	-0.3010299956639812
Chr4	3303483	3303679	Chr4_3303483_3303679_+	0.0	43.0	0	0.0	0.0	-0.3010299956639812	-0.3010299956639812
Chr4	3337647	3337893	Chr4_3337647_3337893_+	0.0	43.0	1	0.0	0.0	-0.3010299956639812	-0.3010299956639812
Chr4	3349257	3349928	Chr4_3349257_3349928_-	1.0	41.0	0	23.375	26.0	1.377943380255784	1.423245873936808
Chr4	3350029	3350170	Chr4_3350029_3350170_-	29.0	13.0	0	26.0	26.0	1.423245873936808	1.423245873936808
Chr4	3352702	3352819	Chr4_3352702_3352819_+	1.0	41.0	0	1.0	1.0	0.17609125905568124	0.17609125905568124
Chr4	3353180	3355042	Chr4_3353180_3355042_+	1.0	41.0	0	27.75	29.0	1.4510184521554574	1.469822015978163
Chr4	3355042	3355200	Chr4_3355042_3355200_-	21.0	21.0	0	19.5	19.5	1.3010299956639813	1.3010299956639813
Chr4	3361384	3362000	Chr4_3361384_3362000_-	17.0	25.0	0	17.285714285714285	17.0	1.2500713114174984	1.2430380486862944
Chr4	3362094	3362740	Chr4_3362094_3362740_-	20.0	22.0	0	14.125	12.5	1.1650958747542182	1.1139433523068367
Chr4	3362794	3363088	Chr4_3362794_3363088_-	19.0	23.0	0	11.0	12.5	1.0606978403536116	1.1139433523068367
Chr4	3366265	3367573	Chr4_3366265_3367573_+	4.0	38.0	0	18.214285714285715	17.5	1.2721732556415075	1.255272505103306
Chr4	3367565	3367861	Chr4_3367565_3367861_+	28.0	14.0	0	26.0	28.5	1.423245873936808	1.462397997898956
Chr4	3367951	3368584	Chr4_3367951_3368584_-	4.0	38.0	0	9.142857142857142	4.0	0.984205732816768	0.6532125137753437
Chr4	3368584	3373684	Chr4_3368584_3373684_+	27.0	15.0	0	18.903846153846153	17.0	1.2878878226021113	1.2430380486862944
Chr4	3373721	3374366	Chr4_3373721_3374366_-	27.0	15.0	0	28.714285714285715	31.0	1.4655952723291037	1.4983105537896004
Chr4	3374355	3374704	Chr4_3374355_3374704_+	31.0	11.0	0	27.2	26.0	1.4424797690644486	1.423245873936808
Chr4	3378563	3378812	Chr4_3378563_3378812_+	28.0	14.0	0	28.0	28.0	1.4548448600085102	1.4548448600085102
Chr4	3383030	3388903	Chr4_3383030_3388903_+	21.0	21.0	1	16.45	16.0	1.2291697025391009	1.2174839442139063
Chr4	3388998	3389191	Chr4_3388998_3389191_+	22.0	20.0	1	26.0	28.0	1.423245873936808	1.4548448600085102
Chr4	3403194	3403385	Chr4_3403194_3403385_+	3.0	39.0	1	6.0	5.0	0.8129133566428556	0.7403626894942439
Chr4	3404471	3404683	Chr4_3404471_3404683_-	0.0	43.0	1	0.0	0.0	-0.3010299956639812	-0.3010299956639812
Chr4	3425872	3426054	Chr4_3425872_3426054_-	0.0	43.0	0	0.0	0.0	-0.3010299956639812	-0.3010299956639812
Chr4	3455714	3455921	Chr4_3455714_3455921_-	0.0	43.0	0	0.0	0.0	-0.3010299956639812	-0.3010299956639812
Chr4	3456175	3456326	Chr4_3456175_3456326_+	0.0	43.0	0	0.0	0.0	-0.3010299956639812	-0.3010299956639812
Chr4	3459673	3460007	Chr4_3459673_3460007_-	0.0	43.0	0	0.0	0.0	-0.3010299956639812	-0.3010299956639812
Chr4	3461996	3462232	Chr4_3461996_3462232_-	0.0	43.0	0	0.0	0.0	-0.3010299956639812	-0.3010299956639812
Chr4	3487843	3487993	Chr4_3487843_3487993_+	1.0	41.0	0	0.5	0.5	0.0	0.0
Chr4	3497201	3497363	Chr4_3497201_3497363_-	0.0	43.0	0	0.0	0.0	-0.3010299956639812	-0.3010299956639812
Chr4	3532525	3539366	Chr4_3532525_3539366_+	11.0	31.0	0	16.652173913043477	16.0	1.234319171527846	1.2174839442139063
Chr4	3588330	3588458	Chr4_3588330_3588458_+	0.0	43.0	0	0.0	0.0	-0.3010299956639812	-0.3010299956639812
Chr4	3602596	3602725	Chr4_3602596_3602725_+	0.0	43.0	0	0.0	0.0	-0.3010299956639812	-0.3010299956639812
Chr4	3611289	3611497	Chr4_3611289_3611497_-	0.0	43.0	0	0.0	0.0	-0.3010299956639812	-0.3010299956639812
Chr4	3630183	3630981	Chr4_3630183_3630981_+	0.0	43.0	1	0.0	0.0	-0.3010299956639812	-0.3010299956639812
Chr4	3654652	3654788	Chr4_3654652_3654788_+	0.0	43.0	1	0.0	0.0	-0.3010299956639812	-0.3010299956639812
Chr4	3654788	3654911	Chr4_3654788_3654911_+	0.0	43.0	1	0.0	0.0	-0.3010299956639812	-0.3010299956639812
Chr4	3655484	3662973	Chr4_3655484_3662973_+	0.0	43.0	1	15.868421052631579	16.0	1.2140067880740086	1.2174839442139063
Chr4	3676764	3676989	Chr4_3676764_3676989_-	0.0	43.0	0	0.0	0.0	-0.3010299956639812	-0.3010299956639812
Chr4	3682765	3682920	Chr4_3682765_3682920_-	0.0	43.0	0	0.0	0.0	-0.3010299956639812	-0.3010299956639812
Chr4	3689786	3689892	Chr4_3689786_3689892_+	0.0	43.0	0	0.0	0.0	-0.3010299956639812	-0.3010299956639812
Chr4	3689917	3690100	Chr4_3689917_3690100_+	0.0	43.0	0	0.0	0.0	-0.3010299956639812	-0.3010299956639812
Chr4	3690476	3690615	Chr4_3690476_3690615_+	0.0	43.0	0	0.0	0.0	-0.3010299956639812	-0.3010299956639812
Chr4	3694971	3695171	Chr4_3694971_3695171_+	0.0	43.0	0	0.0	0.0	-0.3010299956639812	-0.3010299956639812
Chr4	3701434	3702056	Chr4_3701434_3702056_+	1.0	41.0	1	10.142857142857142	16.0	1.027058232734036	1.2174839442139063
Chr4	3718525	3718722	Chr4_3718525_3718722_+	0.0	43.0	0	0.0	0.0	-0.3010299956639812	-0.3010299956639812
Chr4	3720826	3720951	Chr4_3720826_3720951_+	0.0	43.0	0	0.0	0.0	-0.3010299956639812	-0.3010299956639812
Chr4	3770617	3770798	Chr4_3770617_3770798_+	0.0	43.0	1	8.0	8.0	0.9294189257142927	0.9294189257142927
Chr4	3770903	3771084	Chr4_3770903_3771084_+	1.0	41.0	1	0.5	0.5	0.0	0.0
Chr4	3782582	3784444	Chr4_3782582_3784444_+	1.0	41.0	0	28.7	32.0	1.4653828514484182	1.5118833609788744
Chr4	3867025	3867156	Chr4_3867025_3867156_+	0.0	43.0	0	0.0	0.0	-0.3010299956639812	-0.3010299956639812
Chr4	3957673	3957897	Chr4_3957673_3957897_-	0.0	43.0	0	0.0	0.0	-0.3010299956639812	-0.3010299956639812
Chr4	3983157	3983401	Chr4_3983157_3983401_-	8.0	34.0	0	6.25	6.0	0.829303772831025	0.8129133566428556
Chr4	3983407	3983983	Chr4_3983407_3983983_-	5.0	37.0	0	5.0	4.0	0.7403626894942439	0.6532125137753437
Chr4	3983983	3990862	Chr4_3983983_3990862_+	12.0	30.0	0	22.928571428571427	24.5	1.369745808033441	1.3979400086720377
Chr4	3991080	3991556	Chr4_3991080_3991556_-	6.0	36.0	0	14.333333333333334	15.5	1.1712387562612692	1.2041199826559248
Chr4	3991556	3997992	Chr4_3991556_3997992_-	18.0	24.0	0	19.784615384615385	18.0	1.3071667774865976	1.2671717284030137
Chr4	4037059	4037240	Chr4_4037059_4037240_-	0.0	43.0	0	0.0	0.0	-0.3010299956639812	-0.3010299956639812
Chr4	4044768	4045061	Chr4_4044768_4045061_+	0.0	43.0	1	0.0	0.0	-0.3010299956639812	-0.3010299956639812
Chr4	4045104	4045549	Chr4_4045104_4045549_+	0.0	43.0	1	0.0	0.0	-0.3010299956639812	-0.3010299956639812
Chr4	4059231	4059354	Chr4_4059231_4059354_+	0.0	43.0	1	0.0	0.0	-0.3010299956639812	-0.3010299956639812
Chr4	4059937	4060150	Chr4_4059937_4060150_+	0.0	43.0	1	0.0	0.0	-0.3010299956639812	-0.3010299956639812
Chr4	4073046	4073164	Chr4_4073046_4073164_-	0.0	43.0	1	0.0	0.0	-0.3010299956639812	-0.3010299956639812
Chr4	4077962	4078163	Chr4_4077962_4078163_+	8.0	34.0	1	12.333333333333334	12.0	1.1083394747888382	1.0969100130080565
Chr4	4083645	4086845	Chr4_4083645_4086845_+	38.0	4.0	0	39.666666666666664	40.0	1.6038657921912247	1.6074550232146685
Chr5	281	462	Chr5_281_462_-	22.0	20.0	1	20.666666666666668	20.0	1.3256524705723132	1.3117538610557542
Chr5	22169	22355	Chr5_22169_22355_-	0.0	43.0	1	0.0	0.0	-0.3010299956639812	-0.3010299956639812
Chr5	22406	24268	Chr5_22406_24268_+	7.0	35.0	1	28.63157894736842	31.0	1.4643640242619127	1.4983105537896004
Chr5	30481	30631	Chr5_30481_30631_-	0.0	43.0	0	3.6666666666666665	0.0	0.619788758288394	-0.3010299956639812
Chr5	51583	51785	Chr5_51583_51785_+	0.0	43.0	0	0.0	0.0	-0.3010299956639812	-0.3010299956639812
Chr5	51889	52040	Chr5_51889_52040_+	0.0	43.0	0	16.333333333333332	21.0	1.226170123398999	1.3324384599156054
Chr5	52142	56511	Chr5_52142_56511_+	15.0	27.0	0	18.177777777777777	19.0	1.2713252040001461	1.290034611362518
Chr5	54938	55414	Chr5_54938_55414_+	15.0	27.0	0	17.0	16.5	1.2430380486862944	1.2304489213782739
Chr5	73320	73546	Chr5_73320_73546_-	0.0	43.0	0	0.0	0.0	-0.3010299956639812	-0.3010299956639812
Chr5	135871	136185	Chr5_135871_136185_-	0.0	43.0	0	0.0	0.0	-0.3010299956639812	-0.3010299956639812
Chr5	241119	241907	Chr5_241119_241907_-	0.0	43.0	0	5.888888888888889	4.0	0.8054253352503057	0.6532125137753437
Chr5	293527	293736	Chr5_293527_293736_+	0.0	43.0	0	0.0	0.0	-0.3010299956639812	-0.3010299956639812
Chr5	406650	406895	Chr5_406650_406895_+	0.0	43.0	0	0.0	0.0	-0.3010299956639812	-0.3010299956639812
Chr5	431083	431265	Chr5_431083_431265_-	0.0	43.0	0	0.0	0.0	-0.3010299956639812	-0.3010299956639812
Chr5	457279	457522	Chr5_457279_457522_+	0.0	43.0	0	0.0	0.0	-0.3010299956639812	-0.3010299956639812
Chr5	477925	478124	Chr5_477925_478124_-	0.0	43.0	1	0.0	0.0	-0.3010299956639812	-0.3010299956639812
Chr5	478331	478439	Chr5_478331_478439_+	0.0	43.0	1	0.0	0.0	-0.3010299956639812	-0.3010299956639812
Chr5	521915	522391	Chr5_521915_522391_-	8.0	34.0	0	14.8	17.0	1.1846914308175989	1.2430380486862944
Chr5	523063	523407	Chr5_523063_523407_+	0.0	43.0	0	0.0	0.0	-0.3010299956639812	-0.3010299956639812
Chr5	551161	551393	Chr5_551161_551393_-	0.0	43.0	1	0.0	0.0	-0.3010299956639812	-0.3010299956639812
Chr5	560181	561160	Chr5_560181_561160_+	0.0	43.0	1	0.9090909090909091	0.0	0.14893901301206647	-0.3010299956639812
Chr5	560561	560737	Chr5_560561_560737_+	0.0	43.0	1	0.3333333333333333	0.0	-0.07918124604762487	-0.3010299956639812
Chr5	560805	560988	Chr5_560805_560988_+	9.0	33.0	1	4.5	4.5	0.6989700043360189	0.6989700043360189
Chr5	566023	569342	Chr5_566023_569342_-	10.0	32.0	1	24.294117647058822	24.0	1.3943486575824873	1.3891660843645324
Chr5	569316	571752	Chr5_569316_571752_-	39.0	3.0	1	16.12	21.0	1.2206310194480923	1.3324384599156054
Chr5	582099	582316	Chr5_582099_582316_+	3.0	39.0	1	3.75	3.5	0.6283889300503115	0.6020599913279624
Chr5	582920	586699	Chr5_582920_586699_+	3.0	39.0	1	5.052631578947368	4.0	0.7444988586808825	0.6532125137753437
Chr5	586696	588136	Chr5_586696_588136_+	13.0	29.0	1	9.1875	6.5	0.9862117155143667	0.8450980400142568
Chr5	590749	592376	Chr5_590749_592376_+	20.0	22.0	1	12.823529411764707	10.0	1.1246192849705767	1.021189299069938
Chr5	592369	593056	Chr5_592369_593056_+	5.0	37.0	1	14.0	9.5	1.1613680022349748	1.0
Chr5	593772	597068	Chr5_593772_597068_+	9.0	33.0	1	4.852941176470588	4.0	0.7285924709428196	0.6532125137753437
Chr5	597103	597466	Chr5_597103_597466_+	4.0	38.0	1	4.5	4.5	0.6989700043360189	0.6989700043360189
Chr5	603788	607776	Chr5_603788_607776_+	7.0	35.0	1	8.024390243902438	7.0	0.9306633233619647	0.8750612633917001
Chr5	607802	612543	Chr5_607802_612543_+	8.0	34.0	1	10.375	10.0	1.036429265626675	1.021189299069938
Chr5	616873	617085	Chr5_616873_617085_-	27.0	15.0	1	27.0	27.0	1.4393326938302626	1.4393326938302626
Chr5	655033	655152	Chr5_655033_655152_+	16.0	26.0	1	15.0	15.0	1.1903316981702914	1.1903316981702914
Chr5	660234	660447	Chr5_660234_660447_+	15.0	27.0	1	22.0	17.0	1.3521825181113625	1.2430380486862944
Chr5	678878	679311	Chr5_678878_679311_+	17.0	25.0	1	13.166666666666666	10.0	1.135662602000073	1.021189299069938
Chr5	688221	688360	Chr5_688221_688360_+	36.0	6.0	1	36.0	36.0	1.5622928644564746	1.5622928644564746
Chr5	695339	695566	Chr5_695339_695566_+	30.0	12.0	1	30.0	30.0	1.4842998393467859	1.4842998393467859
Chr5	701437	707354	Chr5_701437_707354_+	35.0	7.0	1	35.96666666666667	36.0	1.5618960672777495	1.5622928644564746
Chr5	711485	711671	Chr5_711485_711671_-	36.0	6.0	1	36.0	36.0	1.5622928644564746	1.5622928644564746
Chr5	718850	718958	Chr5_718850_718958_+	36.0	6.0	1	36.0	36.0	1.5622928644564746	1.5622928644564746
Chr5	727107	727894	Chr5_727107_727894_+	28.0	14.0	1	27.0	28.0	1.4393326938302626	1.4548448600085102
Chr5	729275	731667	Chr5_729275_731667_+	26.0	16.0	1	12.52	10.0	1.1146109842321732	1.021189299069938
Chr5	731688	731827	Chr5_731688_731827_+	12.0	30.0	1	9.333333333333334	8.0	0.9927007612585006	0.9294189257142927
Chr5	732315	732660	Chr5_732315_732660_+	8.0	34.0	1	9.5	8.5	1.0	0.9542425094393249
Chr5	733300	734646	Chr5_733300_734646_+	16.0	26.0	1	20.285714285714285	20.0	1.3177649533076692	1.3117538610557542
Chr5	737379	737503	Chr5_737379_737503_+	6.0	36.0	1	6.0	6.0	0.8129133566428556	0.8129133566428556
Chr5	737561	737742	Chr5_737561_737742_+	6.0	36.0	1	6.0	6.0	0.8129133566428556	0.8129133566428556
Chr5	737935	738974	Chr5_737935_738974_+	6.0	36.0	1	13.727272727272727	10.0	1.1531216567242422	1.021189299069938
Chr5	738967	739650	Chr5_738967_739650_+	22.0	20.0	1	12.375	11.5	1.1097472377132287	1.0791812460476249
Chr5	740346	744025	Chr5_740346_744025_+	8.0	34.0	1	8.105263157894736	7.0	0.9347641560434758	0.8750612633917001
Chr5	747768	749656	Chr5_747768_749656_-	8.0	34.0	1	8.7	7.5	0.9637878273455552	0.9030899869919435
Chr5	752111	756966	Chr5_752111_756966_+	15.0	27.0	1	15.571428571428571	14.0	1.2060544824331243	1.1613680022349748
Chr5	757237	758972	Chr5_757237_758972_+	29.0	13.0	1	27.833333333333332	29.0	1.4522976709946303	1.469822015978163
Chr5	768479	768944	Chr5_768479_768944_-	8.0	34.0	1	8.333333333333334	8.0	0.9461246192171454	0.9294189257142927
Chr5	776986	777233	Chr5_776986_777233_-	9.0	33.0	1	8.5	8.5	0.9542425094393249	0.9542425094393249
Chr5	780007	780935	Chr5_780007_780935_+	15.0	27.0	1	32.0	32.5	1.5118833609788744	1.5185139398778875
Chr5	780947	781297	Chr5_780947_781297_+	43.0	0.0	1	34.75	34.5	1.5471591213274176	1.5440680443502757
Chr5	793891	799378	Chr5_793891_799378_+	7.0	35.0	1	13.642857142857142	12.5	1.150537154583293	1.1139433523068367
Chr5	799415	799774	Chr5_799415_799774_-	14.0	28.0	1	12.5	14.0	1.1139433523068367	1.1613680022349748
Chr5	799809	803105	Chr5_799809_803105_-	3.0	39.0	1	4.9411764705882355	4.0	0.7356928113607587	0.6532125137753437
Chr5	803812	804500	Chr5_803812_804500_-	3.0	39.0	1	3.857142857142857	4.0	0.6392017993325291	0.6532125137753437
Chr5	804493	804764	Chr5_804493_804764_-	5.0	37.0	1	7.0	7.0	0.8750612633917001	0.8750612633917001
Chr5	805314	805511	Chr5_805314_805511_+	9.0	33.0	1	9.0	9.0	0.9777236052888477	0.9777236052888477
Chr5	805484	805718	Chr5_805484_805718_+	9.0	33.0	1	9.0	9.0	0.9777236052888477	0.9777236052888477
Chr5	878536	878659	Chr5_878536_878659_-	27.0	15.0	1	27.0	27.0	1.4393326938302626	1.4393326938302626
Chr5	914882	915685	Chr5_914882_915685_-	9.0	33.0	1	8.11111111111111	9.0	0.9350591930669854	0.9777236052888477
Chr5	915700	916382	Chr5_915700_916382_+	9.0	33.0	1	9.0	9.0	0.9777236052888477	0.9777236052888477
Chr5	931778	931991	Chr5_931778_931991_+	25.0	17.0	1	18.666666666666668	16.0	1.2825465899699682	1.2174839442139063
Chr5	949381	949573	Chr5_949381_949573_+	25.0	17.0	1	25.0	25.0	1.4065401804339552	1.4065401804339552
Chr5	949996	951050	Chr5_949996_951050_+	25.0	17.0	1	25.083333333333332	25.0	1.4079571294295616	1.4065401804339552
Chr5	951024	951686	Chr5_951024_951686_+	25.0	17.0	1	21.857142857142858	23.0	1.3494163018682104	1.3710678622717363
Chr5	952311	953474	Chr5_952311_953474_+	24.0	18.0	1	23.833333333333332	24.0	1.3862016054007935	1.3891660843645324
Chr5	973429	973956	Chr5_973429_973956_-	27.0	15.0	1	26.333333333333332	26.0	1.4286746256482061	1.423245873936808
Chr5	973954	981971	Chr5_973954_981971_-	26.0	16.0	1	25.358024691358025	26.0	1.4125953458185885	1.423245873936808
Chr5	983974	986454	Chr5_983974_986454_+	26.0	16.0	1	15.923076923076923	18.5	1.2154545270542059	1.2787536009528289
Chr5	986951	988394	Chr5_986951_988394_+	9.0	33.0	1	7.2	6.0	0.8864907251724818	0.8129133566428556
Chr5	991081	992709	Chr5_991081_992709_+	17.0	25.0	1	16.5	17.0	1.2304489213782739	1.2430380486862944
Chr5	992768	993443	Chr5_992768_993443_+	19.0	23.0	1	19.125	19.0	1.2928096654172903	1.290034611362518
Chr5	994095	997392	Chr5_994095_997392_+	13.0	29.0	1	7.823529411764706	6.0	0.9203075184820352	0.8129133566428556
Chr5	997427	997790	Chr5_997427_997790_+	3.0	39.0	1	9.75	8.5	1.0107238653917732	0.9542425094393249
Chr5	1007281	1007813	Chr5_1007281_1007813_-	15.0	27.0	1	11.285714285714286	12.0	1.0713559085356683	1.0969100130080565
Chr5	1023595	1023701	Chr5_1023595_1023701_-	27.0	15.0	1	27.0	27.0	1.4393326938302626	1.4393326938302626
Chr5	1026751	1027600	Chr5_1026751_1027600_-	25.0	17.0	1	26.333333333333332	27.0	1.4286746256482061	1.4393326938302626
Chr5	1027601	1027759	Chr5_1027601_1027759_+	27.0	15.0	1	27.0	27.0	1.4393326938302626	1.4393326938302626
Chr5	1028284	1029086	Chr5_1028284_1029086_-	27.0	15.0	1	23.666666666666668	24.0	1.3832167518513312	1.3891660843645324
Chr5	1029187	1030593	Chr5_1029187_1030593_-	27.0	15.0	1	20.6	20.0	1.3242824552976926	1.3117538610557542
Chr5	1031256	1031989	Chr5_1031256_1031989_-	27.0	15.0	1	27.5	27.0	1.4471580313422192	1.4393326938302626
Chr5	1031960	1033542	Chr5_1031960_1033542_-	29.0	13.0	1	29.941176470588236	29.0	1.4834614327506814	1.469822015978163
Chr5	1043565	1044054	Chr5_1043565_1044054_+	29.0	13.0	1	19.833333333333332	20.5	1.3082085802911045	1.3222192947339193
Chr5	1044253	1044522	Chr5_1044253_1044522_+	24.0	18.0	1	19.0	19.5	1.290034611362518	1.3010299956639813
Chr5	1045912	1047285	Chr5_1045912_1047285_+	29.0	13.0	1	28.714285714285715	29.0	1.4655952723291037	1.469822015978163
Chr5	1047347	1048556	Chr5_1047347_1048556_+	27.0	15.0	1	27.0	27.0	1.4393326938302626	1.4393326938302626
Chr5	1048989	1049377	Chr5_1048989_1049377_+	27.0	15.0	1	27.0	27.0	1.4393326938302626	1.4393326938302626
Chr5	1049925	1051138	Chr5_1049925_1051138_+	27.0	15.0	1	27.0	27.0	1.4393326938302626	1.4393326938302626
Chr5	1051168	1051445	Chr5_1051168_1051445_+	27.0	15.0	1	27.0	27.0	1.4393326938302626	1.4393326938302626
Chr5	1055005	1055192	Chr5_1055005_1055192_-	11.0	31.0	1	9.0	9.0	0.9777236052888477	0.9777236052888477
Chr5	1055200	1057642	Chr5_1055200_1057642_+	7.0	35.0	1	19.36	19.0	1.2979792441593623	1.290034611362518
Chr5	1057615	1060526	Chr5_1057615_1060526_+	25.0	17.0	1	25.5	27.0	1.414973347970818	1.4393326938302626
Chr5	1083467	1083623	Chr5_1083467_1083623_+	0.0	43.0	0	0.3333333333333333	0.0	-0.07918124604762487	-0.3010299956639812
Chr5	1147258	1153131	Chr5_1147258_1153131_-	0.0	43.0	0	16.066666666666666	16.5	1.2192351340136696	1.2304489213782739
Chr5	1160125	1160245	Chr5_1160125_1160245_+	0.0	43.0	0	0.0	0.0	-0.3010299956639812	-0.3010299956639812
Chr5	1171037	1172899	Chr5_1171037_1172899_-	0.0	43.0	0	29.526315789473685	32.0	1.4775020478014045	1.5118833609788744
Chr5	1181806	1181952	Chr5_1181806_1181952_-	0.0	43.0	0	0.0	0.0	-0.3010299956639812	-0.3010299956639812
Chr5	1223040	1223172	Chr5_1223040_1223172_-	0.0	43.0	0	0.5	0.5	0.0	0.0
Chr5	1223360	1223787	Chr5_1223360_1223787_+	0.0	43.0	0	0.0	0.0	-0.3010299956639812	-0.3010299956639812
Chr5	1255790	1256005	Chr5_1255790_1256005_-	0.0	43.0	0	0.0	0.0	-0.3010299956639812	-0.3010299956639812
Chr5	1256221	1256322	Chr5_1256221_1256322_+	0.0	43.0	0	0.0	0.0	-0.3010299956639812	-0.3010299956639812
Chr5	1318561	1324434	Chr5_1318561_1324434_+	0.0	43.0	1	15.416666666666666	15.0	1.2018521212001028	1.1903316981702914
Chr5	1414916	1415119	Chr5_1414916_1415119_-	0.0	43.0	0	0.0	0.0	-0.3010299956639812	-0.3010299956639812
Chr5	1516722	1516865	Chr5_1516722_1516865_+	0.0	43.0	0	0.0	0.0	-0.3010299956639812	-0.3010299956639812
Chr5	1516897	1517084	Chr5_1516897_1517084_-	0.0	43.0	0	0.0	0.0	-0.3010299956639812	-0.3010299956639812
Chr5	1539686	1543810	Chr5_1539686_1543810_-	25.0	17.0	0	19.232558139534884	21.0	1.2951833910741082	1.3324384599156054
Chr5	1543913	1544109	Chr5_1543913_1544109_-	29.0	13.0	0	28.0	28.0	1.4548448600085102	1.4548448600085102
Chr5	1544109	1546620	Chr5_1544109_1546620_-	27.0	15.0	0	13.846153846153847	14.5	1.1567354838378696	1.1760912590556813
Chr5	1546620	1553930	Chr5_1546620_1553930_-	1.0	41.0	0	3.4324324324324325	1.0	0.5946612692549311	0.17609125905568124
Chr5	1547745	1548275	Chr5_1547745_1548275_+	5.0	37.0	0	14.5	16.0	1.1760912590556813	1.2174839442139063
Chr5	1553930	1557761	Chr5_1553930_1557761_-	8.0	34.0	0	15.897435897435898	16.0	1.2147759417881736	1.2174839442139063
Chr5	1557761	1558377	Chr5_1557761_1558377_-	9.0	33.0	0	7.428571428571429	9.0	0.8991949431084194	0.9777236052888477
Chr5	1558600	1558779	Chr5_1558600_1558779_-	11.0	31.0	0	6.5	6.5	0.8450980400142568	0.8450980400142568
Chr5	1564008	1564245	Chr5_1564008_1564245_+	0.0	43.0	0	0.0	0.0	-0.3010299956639812	-0.3010299956639812
Chr5	1574245	1581789	Chr5_1574245_1581789_+	0.0	43.0	0	22.710526315789473	23.0	1.3656849885150095	1.3710678622717363
Chr5	1646872	1647130	Chr5_1646872_1647130_-	1.0	41.0	0	0.5	0.5	0.0	0.0
Chr5	1648370	1648534	Chr5_1648370_1648534_+	0.0	43.0	0	0.0	0.0	-0.3010299956639812	-0.3010299956639812
Chr5	1707512	1707613	Chr5_1707512_1707613_-	0.0	43.0	0	0.0	0.0	-0.3010299956639812	-0.3010299956639812
Chr5	1707624	1707954	Chr5_1707624_1707954_-	0.0	43.0	0	0.0	0.0	-0.3010299956639812	-0.3010299956639812
Chr5	1708375	1708562	Chr5_1708375_1708562_+	0.0	43.0	0	0.0	0.0	-0.3010299956639812	-0.3010299956639812
Chr5	1867826	1868060	Chr5_1867826_1868060_-	0.0	43.0	0	0.0	0.0	-0.3010299956639812	-0.3010299956639812
Chr5	1868738	1876322	Chr5_1868738_1876322_-	4.0	38.0	0	14.714285714285714	13.0	1.1822515677604997	1.130333768495006
Chr5	1876336	1876530	Chr5_1876336_1876530_-	9.0	33.0	0	10.333333333333334	10.0	1.034762106259212	1.021189299069938
Chr5	1876525	1876643	Chr5_1876525_1876643_+	10.0	32.0	0	8.0	8.0	0.9294189257142927	0.9294189257142927
Chr5	1876645	1880674	Chr5_1876645_1880674_-	6.0	36.0	0	14.121951219512194	14.0	1.165005330715132	1.1613680022349748
Chr5	1880757	1881393	Chr5_1880757_1881393_-	12.0	30.0	0	11.142857142857142	12.0	1.0660595687257197	1.0969100130080565
Chr5	1881393	1884016	Chr5_1881393_1884016_+	12.0	30.0	0	20.714285714285715	20.5	1.3266284136389743	1.3222192947339193
Chr5	1881806	1882581	Chr5_1881806_1882581_-	17.0	25.0	0	18.125	18.5	1.2700962814203305	1.2787536009528289
Chr5	1884021	1891595	Chr5_1884021_1891595_-	10.0	32.0	0	19.776315789473685	20.0	1.306989046437628	1.3117538610557542
Chr5	1891595	1893764	Chr5_1891595_1893764_-	10.0	32.0	0	9.565217391304348	10.0	1.002823159336379	1.021189299069938
Chr5	1893866	1894021	Chr5_1893866_1894021_-	1.0	41.0	0	3.6666666666666665	2.0	0.619788758288394	0.3979400086720376
Chr5	1894012	1906350	Chr5_1894012_1906350_-	8.0	34.0	0	5.887096774193548	5.0	0.8053034964272584	0.7403626894942439
Chr5	1894686	1899201	Chr5_1894686_1899201_-	6.0	36.0	0	7.702127659574468	8.0	0.9139265244512583	0.9294189257142927
Chr5	1899204	1905363	Chr5_1899204_1905363_-	9.0	33.0	0	4.354838709677419	4.0	0.6861748060955895	0.6532125137753437
Chr5	1906350	1906571	Chr5_1906350_1906571_+	4.0	38.0	0	3.6666666666666665	4.0	0.619788758288394	0.6532125137753437
Chr5	1906605	1907036	Chr5_1906605_1907036_+	0.0	43.0	0	0.0	0.0	-0.3010299956639812	-0.3010299956639812
Chr5	1907035	1907912	Chr5_1907035_1907912_-	0.0	43.0	0	1.8	1.0	0.36172783601759284	0.17609125905568124
Chr5	1907912	1915442	Chr5_1907912_1915442_+	4.0	38.0	0	22.539473684210527	23.5	1.3624725538026548	1.380211241711606
Chr5	1915442	1930233	Chr5_1915442_1930233_-	21.0	21.0	0	14.442953020134228	15.0	1.1744364310549678	1.1903316981702914
Chr5	1915676	1923247	Chr5_1915676_1923247_+	18.0	24.0	0	16.558441558441558	18.0	1.2319393519496071	1.2671717284030137
Chr5	1923247	1928994	Chr5_1923247_1928994_+	2.0	40.0	0	13.068965517241379	12.5	1.1325467387961272	1.1139433523068367
Chr5	1930288	1931206	Chr5_1930288_1931206_-	5.0	37.0	0	4.909090909090909	4.0	0.7331242805703245	0.6532125137753437
Chr5	1931206	1949790	Chr5_1931206_1949790_-	2.0	40.0	0	11.908602150537634	11.0	1.0937228602657776	1.0606978403536116
Chr5	1932697	1936600	Chr5_1932697_1936600_-	8.0	34.0	0	7.875	7.0	0.9229848157088828	0.8750612633917001
Chr5	1936600	1943779	Chr5_1936600_1943779_-	8.0	34.0	0	18.25	19.0	1.2730012720637376	1.290034611362518
Chr5	1943779	1947845	Chr5_1943779_1947845_-	2.0	40.0	0	11.333333333333334	10.0	1.0731070983354316	1.021189299069938
Chr5	1949790	1957362	Chr5_1949790_1957362_-	4.0	38.0	0	15.441558441558442	16.0	1.2025307756225243	1.2174839442139063
Chr5	1957362	1972611	Chr5_1957362_1972611_-	1.0	41.0	0	9.084415584415584	8.0	0.9815656366505597	0.9294189257142927
Chr5	1957700	1970922	Chr5_1957700_1970922_+	3.0	39.0	0	9.300751879699249	9.0	0.991259394537262	0.9777236052888477
Chr5	1959614	1960093	Chr5_1959614_1960093_+	10.0	32.0	0	3.8	2.0	0.6334684555795865	0.3979400086720376
Chr5	1960093	1966075	Chr5_1960093_1966075_+	5.0	37.0	0	9.508196721311476	8.0	1.0003558332701343	0.9294189257142927
Chr5	1966075	1966554	Chr5_1966075_1966554_+	10.0	32.0	0	4.666666666666667	3.0	0.7132104434506291	0.5440680443502757
Chr5	1970961	1972223	Chr5_1970961_1972223_+	10.0	32.0	0	9.214285714285714	6.5	0.9874108726919795	0.8450980400142568
Chr5	1972611	1972808	Chr5_1972611_1972808_+	14.0	28.0	0	13.333333333333334	14.0	1.1409268419924303	1.1613680022349748
Chr5	1972831	1975896	Chr5_1972831_1975896_-	3.0	39.0	0	15.580645161290322	17.0	1.2063034688134018	1.2430380486862944
Chr5	1975896	1979233	Chr5_1975896_1979233_-	2.0	40.0	0	8.028571428571428	8.0	0.9308762911151123	0.9294189257142927
Chr5	1979233	1986794	Chr5_1979233_1986794_-	5.0	37.0	0	16.223684210526315	17.0	1.2233319582732167	1.2430380486862944
Chr5	1986794	1988346	Chr5_1986794_1988346_-	3.0	39.0	0	3.1176470588235294	3.0	0.5584261943971428	0.5440680443502757
Chr5	1988448	1988599	Chr5_1988448_1988599_-	0.0	43.0	0	0.0	0.0	-0.3010299956639812	-0.3010299956639812
Chr5	1988599	1990432	Chr5_1988599_1990432_-	0.0	43.0	0	10.8	11.0	1.0530784434834197	1.0606978403536116
Chr5	1990432	1997587	Chr5_1990432_1997587_-	22.0	20.0	0	17.61111111111111	16.5	1.257945094964633	1.2304489213782739
Chr5	1997587	2004499	Chr5_1997587_2004499_-	0.0	43.0	0	3.7	4.0	0.6232492903979004	0.6532125137753437
Chr5	2004499	2006902	Chr5_2004499_2006902_-	3.0	39.0	0	17.76923076923077	18.5	1.2617202616540486	1.2787536009528289
Chr5	2006902	2007103	Chr5_2006902_2007103_+	14.0	28.0	0	17.0	14.0	1.2430380486862944	1.1613680022349748
Chr5	2007103	2013970	Chr5_2007103_2013970_+	23.0	19.0	0	23.130434782608695	25.0	1.3734717124047204	1.4065401804339552
Chr5	2013970	2014250	Chr5_2013970_2014250_+	19.0	23.0	0	6.0	2.0	0.8129133566428556	0.3979400086720376
Chr5	2014250	2020169	Chr5_2014250_2020169_+	1.0	41.0	0	3.1166666666666667	2.0	0.5583084834648859	0.3979400086720376
Chr5	2020169	2020659	Chr5_2020169_2020659_+	11.0	31.0	0	8.0	7.5	0.9294189257142927	0.9030899869919435
Chr5	2020659	2026301	Chr5_2020659_2026301_-	17.0	25.0	0	16.103448275862068	17.5	1.2201982935615971	1.255272505103306
Chr5	2020815	2021291	Chr5_2020815_2021291_+	15.0	27.0	0	14.8	15.0	1.1846914308175989	1.1903316981702914
Chr5	2026301	2029269	Chr5_2026301_2029269_-	6.0	36.0	0	4.7	5.0	0.7160033436347992	0.7403626894942439
Chr5	2029262	2029505	Chr5_2029262_2029505_-	1.0	41.0	0	6.25	3.5	0.829303772831025	0.6020599913279624
Chr5	2029505	2030280	Chr5_2029505_2030280_+	17.0	25.0	0	18.875	20.5	1.2872417111783478	1.3222192947339193
Chr5	2030317	2037892	Chr5_2030317_2037892_+	1.0	41.0	0	15.210526315789474	15.5	1.1961907345125589	1.2041199826559248
Chr5	2037892	2038057	Chr5_2037892_2038057_+	1.0	41.0	0	3.0	2.0	0.5440680443502757	0.3979400086720376
Chr5	2038057	2038670	Chr5_2038057_2038670_+	6.0	36.0	0	2.857142857142857	1.0	0.5259698222574795	0.17609125905568124
Chr5	2038676	2038868	Chr5_2038676_2038868_+	0.0	43.0	0	0.0	0.0	-0.3010299956639812	-0.3010299956639812
Chr5	2038868	2039857	Chr5_2038868_2039857_+	0.0	43.0	0	4.2727272727272725	3.0	0.6787666182477318	0.5440680443502757
Chr5	2039859	2041158	Chr5_2039859_2041158_+	1.0	41.0	0	6.642857142857143	6.0	0.853871964321762	0.8129133566428556
Chr5	2041195	2041827	Chr5_2041195_2041827_-	13.0	29.0	0	3.625	2.0	0.6154239528859439	0.3979400086720376
Chr5	2041920	2043085	Chr5_2041920_2043085_+	7.0	35.0	0	6.083333333333333	6.0	0.8184458452428166	0.8129133566428556
Chr5	2043085	2043399	Chr5_2043085_2043399_-	5.0	37.0	0	8.25	8.5	0.9420080530223133	0.9542425094393249
Chr5	2123378	2123556	Chr5_2123378_2123556_-	0.0	43.0	0	0.0	0.0	-0.3010299956639812	-0.3010299956639812
Chr5	2132269	2132464	Chr5_2132269_2132464_-	0.0	43.0	0	0.0	0.0	-0.3010299956639812	-0.3010299956639812
Chr5	2136717	2137356	Chr5_2136717_2137356_+	3.0	39.0	0	4.714285714285714	4.0	0.7171948244422179	0.6532125137753437
Chr5	2137352	2144650	Chr5_2137352_2144650_-	11.0	31.0	0	20.027027027027028	19.5	1.3123260541318102	1.3010299956639813
Chr5	2137493	2137776	Chr5_2137493_2137776_-	25.0	17.0	0	17.75	17.5	1.2612628687924936	1.255272505103306
Chr5	2142674	2144531	Chr5_2142674_2144531_+	21.0	21.0	0	30.95	32.0	1.4976206497812876	1.5118833609788744
Chr5	2144650	2145284	Chr5_2144650_2145284_+	7.0	35.0	0	8.142857142857142	7.0	0.936657334638212	0.8750612633917001
Chr5	2145680	2145914	Chr5_2145680_2145914_-	5.0	37.0	0	18.25	18.5	1.2730012720637376	1.2787536009528289
Chr5	2148410	2152521	Chr5_2148410_2152521_-	5.0	37.0	0	20.166666666666668	20.0	1.3152704347785915	1.3117538610557542
Chr5	2152521	2159901	Chr5_2152521_2159901_-	13.0	29.0	0	21.96	23.0	1.351409751925439	1.3710678622717363
Chr5	2153665	2155327	Chr5_2153665_2155327_-	23.0	19.0	0	24.833333333333332	25.0	1.403692337561129	1.4065401804339552
Chr5	2172691	2178531	Chr5_2172691_2178531_+	25.0	17.0	0	11.233333333333333	9.0	1.0694214087584686	0.9777236052888477
Chr5	2178544	2179106	Chr5_2178544_2179106_+	23.0	19.0	0	17.428571428571427	16.0	1.2535456858028	1.2174839442139063
Chr5	2179106	2179562	Chr5_2179106_2179562_+	13.0	29.0	0	10.2	7.0	1.0293837776852097	0.8750612633917001
Chr5	2184433	2184633	Chr5_2184433_2184633_-	29.0	13.0	0	29.0	29.0	1.469822015978163	1.469822015978163
Chr5	2184633	2185411	Chr5_2184633_2185411_-	31.0	11.0	0	26.666666666666668	27.0	1.4340363540203143	1.4393326938302626
Chr5	2185517	2185664	Chr5_2185517_2185664_-	24.0	18.0	0	25.5	25.5	1.414973347970818	1.414973347970818
Chr5	2185970	2186078	Chr5_2185970_2186078_+	30.0	12.0	0	25.0	25.0	1.4065401804339552	1.4065401804339552
Chr5	2186080	2186553	Chr5_2186080_2186553_+	20.0	22.0	0	13.666666666666666	13.5	1.151267675330649	1.146128035678238
Chr5	2186553	2192535	Chr5_2186553_2192535_+	15.0	27.0	0	14.819672131147541	14.0	1.185249470704084	1.1613680022349748
Chr5	2192535	2193008	Chr5_2192535_2193008_+	13.0	29.0	0	10.833333333333334	11.5	1.0543576623225928	1.0791812460476249
Chr5	2193503	2194419	Chr5_2193503_2194419_+	29.0	13.0	0	31.0	32.5	1.4983105537896004	1.5185139398778875
Chr5	2194404	2195055	Chr5_2194404_2195055_+	16.0	26.0	0	12.142857142857142	9.0	1.1018452306835687	0.9777236052888477
Chr5	2195135	2195611	Chr5_2195135_2195611_+	20.0	22.0	0	16.666666666666668	17.0	1.2346859743215286	1.2430380486862944
Chr5	2195611	2201594	Chr5_2195611_2201594_+	17.0	25.0	0	19.233333333333334	18.5	1.2952004520032574	1.2787536009528289
Chr5	2201594	2202070	Chr5_2201594_2202070_+	25.0	17.0	0	17.666666666666668	17.5	1.25927524755698	1.255272505103306
Chr5	2202075	2203379	Chr5_2202075_2203379_-	14.0	28.0	0	21.5	21.0	1.3424226808222062	1.3324384599156054
Chr5	2202132	2202415	Chr5_2202132_2202415_-	28.0	14.0	0	22.0	22.5	1.3521825181113625	1.3617278360175928
Chr5	2203377	2204017	Chr5_2203377_2204017_+	30.0	12.0	0	10.875	7.5	1.05595140532915	0.9030899869919435
Chr5	2203966	2204100	Chr5_2203966_2204100_-	2.0	40.0	0	3.5	3.5	0.6020599913279624	0.6020599913279624
Chr5	2204100	2207313	Chr5_2204100_2207313_+	20.0	22.0	0	16.424242424242426	17.0	1.2285092375737403	1.2430380486862944
Chr5	2206137	2206769	Chr5_2206137_2206769_-	3.0	39.0	0	6.571428571428571	6.0	0.8495071589193118	0.8129133566428556
Chr5	2289392	2289645	Chr5_2289392_2289645_-	0.0	43.0	0	0.0	0.0	-0.3010299956639812	-0.3010299956639812
Chr5	2347036	2348552	Chr5_2347036_2348552_-	0.0	43.0	0	3.6875	3.0	0.6219548200449017	0.5440680443502757
Chr5	2347757	2350360	Chr5_2347757_2350360_+	8.0	34.0	0	5.111111111111111	5.0	0.7490488686793365	0.7403626894942439
Chr5	2348553	2351157	Chr5_2348553_2351157_-	8.0	34.0	0	4.296296296296297	5.0	0.6809060042582834	0.7403626894942439
Chr5	2351301	2351499	Chr5_2351301_2351499_-	5.0	37.0	0	6.0	6.0	0.8129133566428556	0.8129133566428556
Chr5	2351499	2360510	Chr5_2351499_2360510_-	7.0	35.0	0	10.956521739130435	9.0	1.0590527835309727	0.9777236052888477
Chr5	2351940	2355603	Chr5_2351940_2355603_+	0.0	43.0	0	12.631578947368421	11.0	1.1183169490065799	1.0606978403536116
Chr5	2355686	2356327	Chr5_2355686_2356327_-	9.0	33.0	0	3.875	3.5	0.640978057358332	0.6020599913279624
Chr5	2356324	2359118	Chr5_2356324_2359118_+	3.0	39.0	0	14.068965517241379	13.0	1.163428715386755	1.130333768495006
Chr5	2359118	2359651	Chr5_2359118_2359651_+	9.0	33.0	0	7.666666666666667	8.5	0.9120448296448701	0.9542425094393249
Chr5	2360510	2367380	Chr5_2360510_2367380_+	9.0	33.0	0	3.0	2.0	0.5440680443502757	0.3979400086720376
Chr5	2367380	2367652	Chr5_2367380_2367652_-	3.0	39.0	0	1.25	1.0	0.24303804868629444	0.17609125905568124
Chr5	2367652	2368049	Chr5_2367652_2368049_-	0.0	43.0	0	3.6	1.0	0.6127838567197355	0.17609125905568124
Chr5	2368049	2368525	Chr5_2368049_2368525_-	6.0	36.0	0	13.833333333333334	14.0	1.156347200859924	1.1613680022349748
Chr5	2368525	2374508	Chr5_2368525_2374508_-	19.0	23.0	0	18.34426229508197	18.0	1.2751791405945307	1.2671717284030137
Chr5	2374508	2374984	Chr5_2374508_2374984_-	13.0	29.0	0	14.6	14.0	1.1789769472931695	1.1613680022349748
Chr5	2375025	2381417	Chr5_2375025_2381417_-	6.0	36.0	0	9.846153846153847	8.0	1.01477893203159	0.9294189257142927
Chr5	2381417	2383328	Chr5_2381417_2383328_-	1.0	41.0	0	4.85	6.0	0.7283537820212285	0.8129133566428556
Chr5	2383328	2383746	Chr5_2383328_2383746_-	1.0	41.0	0	1.8	1.0	0.36172783601759284	0.17609125905568124
Chr5	2383850	2390674	Chr5_2383850_2390674_+	9.0	33.0	0	26.507246376811594	28.0	1.4314803063526031	1.4548448600085102
Chr5	2390975	2391179	Chr5_2390975_2391179_-	2.0	40.0	0	1.0	1.0	0.17609125905568124	0.17609125905568124
Chr5	2571788	2572054	Chr5_2571788_2572054_+	0.0	43.0	1	3.5	3.5	0.6020599913279624	0.6020599913279624
Chr5	2722622	2722778	Chr5_2722622_2722778_+	0.0	43.0	0	0.0	0.0	-0.3010299956639812	-0.3010299956639812
Chr5	2789461	2789633	Chr5_2789461_2789633_-	0.0	43.0	0	0.0	0.0	-0.3010299956639812	-0.3010299956639812
Chr5	2843633	2843834	Chr5_2843633_2843834_-	0.0	43.0	0	0.0	0.0	-0.3010299956639812	-0.3010299956639812
Chr5	2848165	2848318	Chr5_2848165_2848318_+	0.0	43.0	0	0.0	0.0	-0.3010299956639812	-0.3010299956639812
Chr5	2850348	2850539	Chr5_2850348_2850539_+	0.0	43.0	0	0.0	0.0	-0.3010299956639812	-0.3010299956639812
Chr5	2884171	2884430	Chr5_2884171_2884430_-	0.0	43.0	0	0.5	0.5	0.0	0.0
Chr5	2902146	2902355	Chr5_2902146_2902355_+	15.0	27.0	0	8.333333333333334	7.0	0.9461246192171454	0.8750612633917001
Chr5	2903492	2903722	Chr5_2903492_2903722_+	22.0	20.0	0	22.0	21.0	1.3521825181113625	1.3324384599156054
Chr5	2903813	2904077	Chr5_2903813_2904077_-	23.0	19.0	0	16.666666666666668	16.0	1.2346859743215286	1.2174839442139063
Chr5	2904077	2904226	Chr5_2904077_2904226_+	11.0	31.0	0	6.333333333333333	4.0	0.8346326063360918	0.6532125137753437
Chr5	3171450	3171578	Chr5_3171450_3171578_+	0.0	43.0	0	0.0	0.0	-0.3010299956639812	-0.3010299956639812
Chr5	3260228	3260970	Chr5_3260228_3260970_+	0.0	43.0	0	1.25	0.5	0.24303804868629444	0.0
Chr5	3279267	3279441	Chr5_3279267_3279441_-	0.0	43.0	0	0.0	0.0	-0.3010299956639812	-0.3010299956639812
Chr5	3280030	3280300	Chr5_3280030_3280300_-	4.0	38.0	0	4.0	4.0	0.6532125137753437	0.6532125137753437
Chr5	3282051	3282254	Chr5_3282051_3282254_+	0.0	43.0	0	0.0	0.0	-0.3010299956639812	-0.3010299956639812
Chr5	3296781	3296911	Chr5_3296781_3296911_-	0.0	43.0	0	0.0	0.0	-0.3010299956639812	-0.3010299956639812
Chr5	3299747	3299875	Chr5_3299747_3299875_+	0.0	43.0	0	0.0	0.0	-0.3010299956639812	-0.3010299956639812
Chr5	3305563	3305695	Chr5_3305563_3305695_-	0.0	43.0	0	0.0	0.0	-0.3010299956639812	-0.3010299956639812
Chr5	3324079	3324206	Chr5_3324079_3324206_-	2.0	40.0	0	0.6666666666666666	0.0	0.06694678963061314	-0.3010299956639812
Chr5	3329779	3329907	Chr5_3329779_3329907_-	0.0	43.0	0	0.0	0.0	-0.3010299956639812	-0.3010299956639812
Chr5	3330043	3330446	Chr5_3330043_3330446_-	0.0	43.0	0	0.0	0.0	-0.3010299956639812	-0.3010299956639812
Chr5	3348512	3348638	Chr5_3348512_3348638_-	0.0	43.0	0	0.0	0.0	-0.3010299956639812	-0.3010299956639812
Chr5	3374747	3375028	Chr5_3374747_3375028_-	1.0	41.0	0	7.5	5.5	0.9030899869919435	0.7781512503836436
Chr5	3395349	3395553	Chr5_3395349_3395553_-	0.0	43.0	1	0.0	0.0	-0.3010299956639812	-0.3010299956639812
Chr5	3396072	3396229	Chr5_3396072_3396229_-	8.0	34.0	1	3.0	1.0	0.5440680443502757	0.17609125905568124
Chr5	3398475	3398664	Chr5_3398475_3398664_-	0.0	43.0	1	0.0	0.0	-0.3010299956639812	-0.3010299956639812
Chr5	3401004	3401287	Chr5_3401004_3401287_+	18.0	24.0	1	10.333333333333334	7.0	1.034762106259212	0.8750612633917001
Chr5	3401305	3414681	Chr5_3401305_3414681_-	5.0	37.0	1	12.455223880597014	12.5	1.1124449224756654	1.1139433523068367
Chr5	3401872	3402139	Chr5_3401872_3402139_+	12.0	30.0	1	11.25	10.5	1.070037866607755	1.0413926851582251
Chr5	3406102	3406393	Chr5_3406102_3406393_+	8.0	34.0	1	9.333333333333334	8.0	0.9927007612585006	0.9294189257142927
Chr5	3406714	3407358	Chr5_3406714_3407358_+	25.0	17.0	1	23.857142857142858	23.0	1.3866263433142596	1.3710678622717363
Chr5	3407938	3408099	Chr5_3407938_3408099_+	20.0	22.0	1	19.5	19.5	1.3010299956639813	1.3010299956639813
Chr5	3413838	3413988	Chr5_3413838_3413988_-	4.0	38.0	1	4.0	4.0	0.6532125137753437	0.6532125137753437
Chr5	3414097	3414301	Chr5_3414097_3414301_+	8.0	34.0	1	16.0	13.0	1.2174839442139063	1.130333768495006
Chr5	3414665	3415320	Chr5_3414665_3415320_+	29.0	13.0	1	30.375	29.0	1.489606966267722	1.469822015978163
Chr5	3415401	3421242	Chr5_3415401_3421242_-	37.0	5.0	1	31.28813559322034	35.0	1.5022650568445974	1.550228353055094
Chr5	3419149	3419792	Chr5_3419149_3419792_-	24.0	18.0	1	7.285714285714286	5.0	0.8912984622623856	0.7403626894942439
Chr5	3421242	3421877	Chr5_3421242_3421877_+	38.0	4.0	1	35.42857142857143	35.0	1.5554399493776894	1.550228353055094
Chr5	3421819	3422205	Chr5_3421819_3422205_-	34.0	8.0	1	29.2	32.0	1.4727564493172123	1.5118833609788744
Chr5	3422284	3423647	Chr5_3422284_3423647_+	18.0	24.0	1	13.133333333333333	13.0	1.1346020532876793	1.130333768495006
Chr5	3448148	3450010	Chr5_3448148_3450010_+	22.0	20.0	1	29.5	29.0	1.4771212547196624	1.469822015978163
Chr5	3458321	3460231	Chr5_3458321_3460231_-	34.0	8.0	1	29.8	28.0	1.481442628502305	1.4548448600085102
Chr5	3461462	3466984	Chr5_3461462_3466984_+	28.0	14.0	1	17.517857142857142	17.5	1.25570313923071	1.255272505103306
Chr5	3467119	3467986	Chr5_3467119_3467986_+	31.0	11.0	1	30.666666666666668	31.0	1.4936903561528554	1.4983105537896004
Chr5	3475341	3475503	Chr5_3475341_3475503_-	31.0	11.0	1	31.0	31.0	1.4983105537896004	1.4983105537896004
Chr5	3477977	3478115	Chr5_3477977_3478115_-	31.0	11.0	1	31.0	31.0	1.4983105537896004	1.4983105537896004
Chr5	3481472	3482160	Chr5_3481472_3482160_-	31.0	11.0	1	31.0	31.0	1.4983105537896004	1.4983105537896004
Chr5	3482358	3482584	Chr5_3482358_3482584_+	31.0	11.0	1	31.0	31.0	1.4983105537896004	1.4983105537896004
Chr5	3485704	3490868	Chr5_3485704_3490868_+	21.0	21.0	1	17.21153846153846	17.0	1.2482562865620497	1.2430380486862944
Chr5	3497896	3503060	Chr5_3497896_3503060_-	26.0	16.0	1	17.18867924528302	16.0	1.2476954067989674	1.2174839442139063
Chr5	3533122	3533408	Chr5_3533122_3533408_-	31.0	11.0	1	31.0	31.0	1.4983105537896004	1.4983105537896004
Chr5	3536821	3538595	Chr5_3536821_3538595_-	31.0	11.0	1	31.0	31.0	1.4983105537896004	1.4983105537896004
Chr5	3569325	3569460	Chr5_3569325_3569460_-	27.0	15.0	1	29.0	29.0	1.469822015978163	1.469822015978163
Chr5	3569460	3576328	Chr5_3569460_3576328_+	31.0	11.0	1	24.02857142857143	26.5	1.3896722551466596	1.4313637641589874
Chr5	3576422	3582285	Chr5_3576422_3582285_-	34.0	8.0	0	32.03389830508475	34.0	1.5123361048112796	1.5378190950732742
Chr5	3583074	3588235	Chr5_3583074_3588235_-	29.0	13.0	0	29.132075471698112	31.0	1.4717620711337345	1.4983105537896004
Chr5	3605641	3606739	Chr5_3605641_3606739_-	32.0	10.0	1	32.0	32.0	1.5118833609788744	1.5118833609788744
Chr5	3609867	3610254	Chr5_3609867_3610254_+	32.0	10.0	1	32.0	32.0	1.5118833609788744	1.5118833609788744
Chr5	3614251	3616097	Chr5_3614251_3616097_+	32.0	10.0	0	32.0	32.0	1.5118833609788744	1.5118833609788744
Chr5	3618296	3618546	Chr5_3618296_3618546_-	32.0	10.0	0	32.0	32.0	1.5118833609788744	1.5118833609788744
Chr5	3620142	3621999	Chr5_3620142_3621999_-	32.0	10.0	0	32.0	32.0	1.5118833609788744	1.5118833609788744
Chr5	3624089	3629611	Chr5_3624089_3629611_-	27.0	15.0	0	17.736842105263158	18.0	1.2609496379949965	1.2671717284030137
Chr5	3631324	3635282	Chr5_3631324_3635282_+	32.0	10.0	0	30.025	31.0	1.48465567261692	1.4983105537896004
Chr5	3643385	3644064	Chr5_3643385_3644064_+	34.0	8.0	0	34.0	34.0	1.5378190950732742	1.5378190950732742
Chr5	3644181	3650054	Chr5_3644181_3650054_+	27.0	15.0	0	16.716666666666665	16.0	1.2359490711359769	1.2174839442139063
Chr5	3651743	3655355	Chr5_3651743_3655355_-	33.0	9.0	1	33.0	33.0	1.5250448070368452	1.5250448070368452
Chr5	3681051	3681218	Chr5_3681051_3681218_-	17.0	25.0	1	16.666666666666668	17.0	1.2346859743215286	1.2430380486862944
Chr5	3688701	3689029	Chr5_3688701_3689029_+	25.0	17.0	1	25.0	25.0	1.4065401804339552	1.4065401804339552
Chr5	3689754	3689965	Chr5_3689754_3689965_+	25.0	17.0	1	25.0	25.0	1.4065401804339552	1.4065401804339552
Chr5	3692346	3692524	Chr5_3692346_3692524_-	24.0	18.0	0	24.0	24.0	1.3891660843645324	1.3891660843645324
Chr5	3695401	3697258	Chr5_3695401_3697258_-	32.0	10.0	0	31.842105263157894	32.0	1.5097682862696438	1.5118833609788744
Chr5	3697258	3699658	Chr5_3697258_3699658_+	29.0	13.0	0	27.08	28.0	1.4405942618398309	1.4548448600085102
Chr5	3699674	3706778	Chr5_3699674_3706778_+	8.0	34.0	0	6.111111111111111	5.0	0.8202744562892247	0.7403626894942439
Chr5	3708471	3709837	Chr5_3708471_3709837_+	30.0	12.0	0	31.6	31.0	1.506505032404872	1.4983105537896004
Chr5	3709874	3710513	Chr5_3709874_3710513_-	34.0	8.0	0	34.125	34.0	1.5393897820725049	1.5378190950732742
Chr5	3710492	3710828	Chr5_3710492_3710828_+	34.0	8.0	0	30.6	32.0	1.4927603890268375	1.5118833609788744
Chr5	3710909	3711544	Chr5_3710909_3711544_-	2.0	40.0	0	12.714285714285714	14.0	1.1210436927247758	1.1613680022349748
Chr5	3711544	3711774	Chr5_3711544_3711774_+	33.0	9.0	0	28.333333333333332	28.0	1.4598948527451518	1.4548448600085102
Chr5	3711777	3713362	Chr5_3711777_3713362_-	24.0	18.0	0	20.58823529411765	20.0	1.324040238625545	1.3117538610557542
Chr5	3713362	3720191	Chr5_3713362_3720191_+	26.0	16.0	0	17.420289855072465	17.0	1.2533450299600608	1.2430380486862944
Chr5	3720191	3726090	Chr5_3720191_3726090_-	7.0	35.0	0	24.866666666666667	26.0	1.4042634020509104	1.423245873936808
Chr5	3726090	3730972	Chr5_3726090_3730972_+	22.0	20.0	0	21.94	23.0	1.351022852584124	1.3710678622717363
Chr5	3726282	3727049	Chr5_3726282_3727049_-	10.0	32.0	0	17.88888888888889	16.0	1.2645554886724126	1.2174839442139063
Chr5	3731009	3731646	Chr5_3731009_3731646_-	21.0	21.0	0	18.571428571428573	19.0	1.2803832256863372	1.290034611362518
Chr5	3731644	3734359	Chr5_3731644_3734359_+	28.0	14.0	0	33.464285714285715	35.0	1.5310224855951948	1.550228353055094
Chr5	3734396	3734778	Chr5_3734396_3734778_-	29.0	13.0	0	26.8	26.0	1.436162647040756	1.423245873936808
Chr5	3734778	3740427	Chr5_3734778_3740427_+	24.0	18.0	0	9.482758620689655	9.5	0.9992505701644989	1.0
Chr5	3740463	3741480	Chr5_3740463_3741480_+	24.0	18.0	0	15.272727272727273	20.0	1.1979067939686674	1.3117538610557542
Chr5	3741030	3741210	Chr5_3741030_3741210_+	20.0	22.0	0	11.666666666666666	14.0	1.0851716097368123	1.1613680022349748
Chr5	3741490	3741706	Chr5_3741490_3741706_-	2.0	40.0	0	19.25	23.5	1.295567099962479	1.380211241711606
Chr5	3742141	3742381	Chr5_3742141_3742381_+	0.0	43.0	0	0.0	0.0	-0.3010299956639812	-0.3010299956639812
Chr5	3746291	3746559	Chr5_3746291_3746559_-	0.0	43.0	0	0.0	0.0	-0.3010299956639812	-0.3010299956639812
Chr5	3755032	3755247	Chr5_3755032_3755247_-	0.0	43.0	1	0.0	0.0	-0.3010299956639812	-0.3010299956639812
Chr5	3774329	3774488	Chr5_3774329_3774488_-	0.0	43.0	1	0.0	0.0	-0.3010299956639812	-0.3010299956639812
Chr5	3789205	3790028	Chr5_3789205_3790028_+	0.0	43.0	0	1.4444444444444444	0.0	0.28879553924696955	-0.3010299956639812
Chr5	3814811	3815011	Chr5_3814811_3815011_+	0.0	43.0	0	0.0	0.0	-0.3010299956639812	-0.3010299956639812
Chr5	3815150	3815327	Chr5_3815150_3815327_-	0.0	43.0	0	0.0	0.0	-0.3010299956639812	-0.3010299956639812
Chr5	3871254	3871510	Chr5_3871254_3871510_+	0.0	43.0	0	0.0	0.0	-0.3010299956639812	-0.3010299956639812
Chr5	3906665	3906835	Chr5_3906665_3906835_+	0.0	43.0	0	0.0	0.0	-0.3010299956639812	-0.3010299956639812
Chr5	3930770	3930931	Chr5_3930770_3930931_+	0.0	43.0	1	0.0	0.0	-0.3010299956639812	-0.3010299956639812
Chr5	3970241	3970397	Chr5_3970241_3970397_+	0.0	43.0	0	0.0	0.0	-0.3010299956639812	-0.3010299956639812
Chr5	3987589	3987698	Chr5_3987589_3987698_+	1.0	41.0	1	1.0	1.0	0.17609125905568124	0.17609125905568124
Chr5	3989363	3989490	Chr5_3989363_3989490_+	0.0	43.0	1	0.0	0.0	-0.3010299956639812	-0.3010299956639812
Chr5	4116519	4117258	Chr5_4116519_4117258_+	0.0	43.0	0	2.375	2.0	0.4586378490256493	0.3979400086720376
Chr5	4171449	4171711	Chr5_4171449_4171711_-	27.0	15.0	0	28.0	28.0	1.4548448600085102	1.4548448600085102
Chr6	52	643	Chr6_52_643_-	40.0	3.0	1	32.285714285714285	33.0	1.5156846498590233	1.5250448070368452
Chr6	682	1306	Chr6_682_1306_+	19.0	23.0	1	9.625	6.5	1.0053950318867062	0.8450980400142568
Chr6	87601	87715	Chr6_87601_87715_-	0.0	43.0	0	0.0	0.0	-0.3010299956639812	-0.3010299956639812
Chr6	176155	176360	Chr6_176155_176360_+	0.0	43.0	1	0.0	0.0	-0.3010299956639812	-0.3010299956639812
Chr6	176840	176984	Chr6_176840_176984_-	0.0	43.0	1	0.0	0.0	-0.3010299956639812	-0.3010299956639812
Chr6	292909	293857	Chr6_292909_293857_+	12.0	30.0	0	3.6	1.5	0.6127838567197355	0.3010299956639812
Chr6	344417	349903	Chr6_344417_349903_+	24.0	18.0	0	13.285714285714286	13.5	1.1394292733295357	1.146128035678238
Chr6	353888	359784	Chr6_353888_359784_+	0.0	43.0	0	29.1	32.0	1.4712917110589385	1.5118833609788744
Chr6	396803	396947	Chr6_396803_396947_+	0.0	43.0	0	0.0	0.0	-0.3010299956639812	-0.3010299956639812
Chr6	411186	411321	Chr6_411186_411321_-	2.0	40.0	0	0.6666666666666666	0.0	0.06694678963061314	-0.3010299956639812
Chr6	413154	413261	Chr6_413154_413261_-	3.0	39.0	0	2.0	2.0	0.3979400086720376	0.3979400086720376
Chr6	414959	415141	Chr6_414959_415141_+	0.0	43.0	0	0.3333333333333333	0.0	-0.07918124604762487	-0.3010299956639812
Chr6	415717	415833	Chr6_415717_415833_-	16.0	26.0	0	16.0	16.0	1.2174839442139063	1.2174839442139063
Chr6	415838	415959	Chr6_415838_415959_+	16.0	26.0	0	8.0	8.0	0.9294189257142927	0.9294189257142927
Chr6	420251	433135	Chr6_420251_433135_+	0.0	43.0	0	16.06153846153846	14.5	1.2191006775166504	1.1760912590556813
Chr6	423288	423923	Chr6_423288_423923_+	9.0	33.0	0	5.375	4.0	0.7690078709437739	0.6532125137753437
Chr6	423920	429059	Chr6_423920_429059_-	12.0	30.0	0	12.634615384615385	11.0	1.1184173600467333	1.0606978403536116
Chr6	429059	429695	Chr6_429059_429695_+	13.0	29.0	0	8.142857142857142	8.0	0.936657334638212	0.9294189257142927
Chr6	431141	432998	Chr6_431141_432998_-	27.0	15.0	0	31.736842105263158	32.0	1.508352492083741	1.5118833609788744
Chr6	433135	433688	Chr6_433135_433688_-	22.0	20.0	0	16.0	17.5	1.2174839442139063	1.255272505103306
Chr6	433688	439671	Chr6_433688_439671_-	18.0	24.0	0	18.770491803278688	18.0	1.2848927984501912	1.2671717284030137
Chr6	439671	440147	Chr6_439671_440147_-	16.0	26.0	0	14.166666666666666	14.5	1.166331421766525	1.1760912590556813
Chr6	440147	443023	Chr6_440147_443023_+	6.0	36.0	0	13.7	15.5	1.1522883443830565	1.2041199826559248
Chr6	490991	491120	Chr6_490991_491120_-	0.0	43.0	0	0.0	0.0	-0.3010299956639812	-0.3010299956639812
Chr6	532038	532193	Chr6_532038_532193_-	0.0	43.0	0	0.5	0.5	0.0	0.0
Chr6	550567	552051	Chr6_550567_552051_-	0.0	43.0	0	18.125	20.0	1.2700962814203305	1.3117538610557542
Chr6	551276	552100	Chr6_551276_552100_+	25.0	17.0	0	14.666666666666666	12.0	1.18089014193745	1.0969100130080565
Chr6	552101	558939	Chr6_552101_558939_+	10.0	32.0	0	18.507246376811594	16.0	1.278919204189117	1.2174839442139063
Chr6	558939	561509	Chr6_558939_561509_-	21.0	21.0	0	21.11111111111111	19.0	1.3346770962224017	1.290034611362518
Chr6	561613	561809	Chr6_561613_561809_-	19.0	23.0	0	17.666666666666668	18.0	1.25927524755698	1.2671717284030137
Chr6	561809	568150	Chr6_561809_568150_-	16.0	26.0	0	14.890625	15.0	1.1872562565137246	1.1903316981702914
Chr6	568150	568799	Chr6_568150_568799_-	24.0	18.0	0	22.285714285714285	24.0	1.357662647378943	1.3891660843645324
Chr6	569006	569185	Chr6_569006_569185_-	28.0	14.0	0	20.0	20.0	1.3117538610557542	1.3117538610557542
Chr6	587103	587305	Chr6_587103_587305_-	0.0	43.0	1	0.3333333333333333	0.0	-0.07918124604762487	-0.3010299956639812
Chr6	587889	588065	Chr6_587889_588065_+	0.0	43.0	1	0.0	0.0	-0.3010299956639812	-0.3010299956639812
Chr6	621652	622048	Chr6_621652_622048_-	1.0	41.0	0	1.0	1.0	0.17609125905568124	0.17609125905568124
Chr6	622309	622442	Chr6_622309_622442_-	1.0	41.0	0	1.0	1.0	0.17609125905568124	0.17609125905568124
Chr6	626440	626556	Chr6_626440_626556_-	1.0	41.0	0	1.0	1.0	0.17609125905568124	0.17609125905568124
Chr6	636580	642102	Chr6_636580_642102_+	29.0	13.0	0	16.719298245614034	16.0	1.2360154482635335	1.2174839442139063
Chr6	656849	656993	Chr6_656849_656993_-	0.0	43.0	0	0.0	0.0	-0.3010299956639812	-0.3010299956639812
Chr6	656997	657228	Chr6_656997_657228_+	0.0	43.0	0	0.0	0.0	-0.3010299956639812	-0.3010299956639812
Chr6	657303	657515	Chr6_657303_657515_+	0.0	43.0	0	0.0	0.0	-0.3010299956639812	-0.3010299956639812
Chr6	680615	680857	Chr6_680615_680857_-	0.0	43.0	1	0.0	0.0	-0.3010299956639812	-0.3010299956639812
Chr6	750882	751144	Chr6_750882_751144_-	1.0	41.0	0	7.25	8.5	0.8893017025063102	0.9542425094393249
Chr6	772954	773242	Chr6_772954_773242_-	0.0	43.0	0	0.0	0.0	-0.3010299956639812	-0.3010299956639812
Chr6	850560	850779	Chr6_850560_850779_-	6.0	36.0	1	20.666666666666668	28.0	1.3256524705723132	1.4548448600085102
Chr6	854809	854940	Chr6_854809_854940_+	0.0	43.0	1	0.0	0.0	-0.3010299956639812	-0.3010299956639812
Chr6	855395	855571	Chr6_855395_855571_+	0.0	43.0	1	0.0	0.0	-0.3010299956639812	-0.3010299956639812
Chr6	856355	856833	Chr6_856355_856833_+	0.0	43.0	1	0.0	0.0	-0.3010299956639812	-0.3010299956639812
Chr6	862760	863406	Chr6_862760_863406_-	3.0	39.0	1	2.25	2.5	0.43933269383026263	0.47712125471966244
Chr6	879237	879367	Chr6_879237_879367_-	0.0	43.0	0	0.0	0.0	-0.3010299956639812	-0.3010299956639812
Chr6	907825	908024	Chr6_907825_908024_+	0.0	43.0	0	0.0	0.0	-0.3010299956639812	-0.3010299956639812
Chr6	929504	929629	Chr6_929504_929629_-	0.0	43.0	0	0.0	0.0	-0.3010299956639812	-0.3010299956639812
Chr6	1002175	1002388	Chr6_1002175_1002388_+	11.0	31.0	0	11.0	11.0	1.0606978403536116	1.0606978403536116
Chr6	1026121	1026317	Chr6_1026121_1026317_+	4.0	38.0	0	9.0	9.0	0.9777236052888477	0.9777236052888477
Chr6	1026828	1027014	Chr6_1026828_1027014_-	12.0	30.0	0	7.0	6.0	0.8750612633917001	0.8129133566428556
Chr6	1027014	1027332	Chr6_1027014_1027332_+	3.0	39.0	0	1.0	0.5	0.17609125905568124	0.0
Chr6	1068615	1068878	Chr6_1068615_1068878_+	0.0	43.0	0	0.3333333333333333	0.0	-0.07918124604762487	-0.3010299956639812
Chr6	1081129	1081329	Chr6_1081129_1081329_+	0.0	43.0	0	0.0	0.0	-0.3010299956639812	-0.3010299956639812
Chr6	1088608	1088796	Chr6_1088608_1088796_+	0.0	43.0	0	0.0	0.0	-0.3010299956639812	-0.3010299956639812
Chr6	1090095	1090371	Chr6_1090095_1090371_-	0.0	43.0	0	0.0	0.0	-0.3010299956639812	-0.3010299956639812
Chr6	1090430	1090583	Chr6_1090430_1090583_-	0.0	43.0	0	0.0	0.0	-0.3010299956639812	-0.3010299956639812
Chr6	1118852	1119674	Chr6_1118852_1119674_+	0.0	43.0	0	0.3333333333333333	0.0	-0.07918124604762487	-0.3010299956639812
Chr6	1127245	1127404	Chr6_1127245_1127404_-	0.0	43.0	0	0.0	0.0	-0.3010299956639812	-0.3010299956639812
Chr6	1146194	1146379	Chr6_1146194_1146379_+	0.0	43.0	0	0.0	0.0	-0.3010299956639812	-0.3010299956639812
Chr6	1147157	1147386	Chr6_1147157_1147386_-	0.0	43.0	0	0.0	0.0	-0.3010299956639812	-0.3010299956639812
Chr6	1181991	1182159	Chr6_1181991_1182159_+	0.0	43.0	0	0.0	0.0	-0.3010299956639812	-0.3010299956639812
Chr6	1209752	1209905	Chr6_1209752_1209905_+	0.0	43.0	0	0.0	0.0	-0.3010299956639812	-0.3010299956639812
Chr6	1210062	1210182	Chr6_1210062_1210182_+	0.0	43.0	0	0.0	0.0	-0.3010299956639812	-0.3010299956639812
Chr6	1224196	1224398	Chr6_1224196_1224398_+	0.0	43.0	0	0.0	0.0	-0.3010299956639812	-0.3010299956639812
Chr6	1231584	1231792	Chr6_1231584_1231792_+	2.0	40.0	0	1.0	1.0	0.17609125905568124	0.17609125905568124
Chr6	1256615	1257060	Chr6_1256615_1257060_-	0.0	43.0	0	0.0	0.0	-0.3010299956639812	-0.3010299956639812
Chr6	1257106	1257401	Chr6_1257106_1257401_-	0.0	43.0	0	0.0	0.0	-0.3010299956639812	-0.3010299956639812
Chr6	1258347	1259085	Chr6_1258347_1259085_+	0.0	43.0	0	8.75	10.0	0.9661417327390326	1.021189299069938
Chr6	1265958	1266064	Chr6_1265958_1266064_-	0.0	43.0	0	0.0	0.0	-0.3010299956639812	-0.3010299956639812
Chr6	1266086	1266297	Chr6_1266086_1266297_-	0.0	43.0	0	0.0	0.0	-0.3010299956639812	-0.3010299956639812
Chr6	1308341	1308554	Chr6_1308341_1308554_-	0.0	43.0	0	0.0	0.0	-0.3010299956639812	-0.3010299956639812
Chr6	1309413	1309601	Chr6_1309413_1309601_-	0.0	43.0	0	0.0	0.0	-0.3010299956639812	-0.3010299956639812
Chr6	1468168	1468906	Chr6_1468168_1468906_+	0.0	43.0	0	2.2222222222222223	1.0	0.4349235749252076	0.17609125905568124
Chr6	1504413	1504671	Chr6_1504413_1504671_-	0.0	43.0	1	0.3333333333333333	0.0	-0.07918124604762487	-0.3010299956639812
Chr6	1519820	1519963	Chr6_1519820_1519963_-	0.0	43.0	0	0.0	0.0	-0.3010299956639812	-0.3010299956639812
Chr6	1521808	1521936	Chr6_1521808_1521936_+	0.0	43.0	0	0.0	0.0	-0.3010299956639812	-0.3010299956639812
Chr6	1522320	1522457	Chr6_1522320_1522457_-	0.0	43.0	0	0.0	0.0	-0.3010299956639812	-0.3010299956639812
Chr6	1572015	1572192	Chr6_1572015_1572192_-	0.0	43.0	0	0.0	0.0	-0.3010299956639812	-0.3010299956639812
Chr6	1588521	1588765	Chr6_1588521_1588765_-	0.0	43.0	0	0.0	0.0	-0.3010299956639812	-0.3010299956639812
Chr6	1754639	1754771	Chr6_1754639_1754771_-	0.0	43.0	0	0.0	0.0	-0.3010299956639812	-0.3010299956639812
Chr6	1832346	1832552	Chr6_1832346_1832552_+	1.0	41.0	0	7.666666666666667	3.0	0.9120448296448701	0.5440680443502757
Chr6	1836306	1836552	Chr6_1836306_1836552_+	28.0	14.0	0	28.0	28.0	1.4548448600085102	1.4548448600085102
Chr6	1886496	1886623	Chr6_1886496_1886623_+	0.0	43.0	0	0.0	0.0	-0.3010299956639812	-0.3010299956639812
Chr6	1889322	1889448	Chr6_1889322_1889448_-	0.0	43.0	0	2.5	2.5	0.47712125471966244	0.47712125471966244
Chr6	1890207	1890388	Chr6_1890207_1890388_+	5.0	37.0	0	5.0	5.0	0.7403626894942439	0.7403626894942439
Chr6	1890987	1891175	Chr6_1890987_1891175_-	5.0	37.0	0	5.0	5.0	0.7403626894942439	0.7403626894942439
Chr6	1892039	1892318	Chr6_1892039_1892318_+	5.0	37.0	0	4.5	4.5	0.6989700043360189	0.6989700043360189
Chr6	1892326	1892444	Chr6_1892326_1892444_-	5.0	37.0	0	5.0	5.0	0.7403626894942439	0.7403626894942439
Chr6	1893674	1893854	Chr6_1893674_1893854_-	0.0	43.0	0	0.0	0.0	-0.3010299956639812	-0.3010299956639812
Chr6	1922842	1923025	Chr6_1922842_1923025_+	0.0	43.0	0	0.0	0.0	-0.3010299956639812	-0.3010299956639812
Chr6	2082763	2082872	Chr6_2082763_2082872_-	0.0	43.0	0	0.0	0.0	-0.3010299956639812	-0.3010299956639812
Chr6	2166905	2167316	Chr6_2166905_2167316_+	2.0	40.0	0	13.2	13.0	1.1367205671564067	1.130333768495006
Chr6	2167332	2169105	Chr6_2167332_2169105_+	24.0	18.0	0	10.842105263157896	10.0	1.0546936735439214	1.021189299069938
Chr6	2169105	2169372	Chr6_2169105_2169372_-	4.0	38.0	0	1.3333333333333333	0.0	0.2632414347745814	-0.3010299956639812
Chr6	2169437	2169588	Chr6_2169437_2169588_+	0.0	43.0	0	0.0	0.0	-0.3010299956639812	-0.3010299956639812
Chr6	2169589	2171358	Chr6_2169589_2171358_-	0.0	43.0	0	14.68421052631579	9.0	1.1813922165389212	0.9777236052888477
Chr6	2171366	2172919	Chr6_2171366_2172919_+	5.0	37.0	0	21.41176470588235	26.0	1.3406773557060376	1.423245873936808
Chr6	2172920	2183626	Chr6_2172920_2183626_-	14.0	28.0	0	25.84259259259259	27.0	1.4206585152441402	1.4393326938302626
Chr6	2174321	2181777	Chr6_2174321_2181777_+	20.0	22.0	0	26.333333333333332	27.0	1.4286746256482061	1.4393326938302626
Chr6	2183626	2183823	Chr6_2183626_2183823_-	10.0	32.0	0	15.0	15.0	1.1903316981702914	1.1903316981702914
Chr6	2183823	2184298	Chr6_2183823_2184298_+	20.0	22.0	0	20.8	21.0	1.3283796034387378	1.3324384599156054
Chr6	2184298	2189534	Chr6_2184298_2189534_-	22.0	20.0	0	26.61111111111111	28.0	1.4331473168994044	1.4548448600085102
Chr6	2185067	2185278	Chr6_2185067_2185278_-	13.0	29.0	0	16.0	17.0	1.2174839442139063	1.2430380486862944
Chr6	2189534	2189731	Chr6_2189534_2189731_-	23.0	19.0	0	19.666666666666668	19.0	1.3046341199328064	1.290034611362518
Chr6	2189768	2199630	Chr6_2189768_2199630_+	17.0	25.0	0	15.86	16.0	1.2137832993353042	1.2174839442139063
Chr6	2199630	2200480	Chr6_2199630_2200480_+	14.0	28.0	0	18.77777777777778	19.0	1.2850569696875678	1.290034611362518
Chr6	2200480	2203292	Chr6_2200480_2203292_-	15.0	27.0	0	15.413793103448276	16.0	1.2017737074629748	1.2174839442139063
Chr6	2203329	2214021	Chr6_2203329_2214021_-	5.0	37.0	0	14.064814814814815	15.0	1.1633049671363371	1.1903316981702914
Chr6	2214017	2217906	Chr6_2214017_2217906_-	5.0	37.0	0	22.025	19.5	1.3526647996511005	1.3010299956639813
Chr6	2214494	2216351	Chr6_2214494_2216351_-	8.0	34.0	0	30.15	32.0	1.4864304788544338	1.5118833609788744
Chr6	2218005	2218160	Chr6_2218005_2218160_-	10.0	32.0	0	12.0	12.0	1.0969100130080565	1.0969100130080565
Chr6	2218154	2218936	Chr6_2218154_2218936_+	14.0	28.0	0	23.22222222222222	25.0	1.3751553699217178	1.4065401804339552
Chr6	2218936	2221845	Chr6_2218936_2221845_+	26.0	16.0	0	27.5	26.0	1.4471580313422192	1.423245873936808
Chr6	2221845	2222547	Chr6_2221845_2222547_+	22.0	20.0	0	22.0	23.5	1.3521825181113625	1.380211241711606
Chr6	2222547	2230015	Chr6_2222547_2230015_-	11.0	31.0	0	22.276315789473685	22.0	1.3574834755946026	1.3521825181113625
Chr6	2230015	2231801	Chr6_2230015_2231801_-	22.0	20.0	0	23.263157894736842	23.0	1.3759041536966956	1.3710678622717363
Chr6	2231814	2239158	Chr6_2231814_2239158_+	11.0	31.0	0	18.41891891891892	18.0	1.276896315947262	1.2671717284030137
Chr6	2239158	2245877	Chr6_2239158_2245877_+	16.0	26.0	0	20.044117647058822	19.0	1.3126874934079455	1.290034611362518
Chr6	2245877	2254217	Chr6_2245877_2254217_+	4.0	38.0	0	19.435294117647057	20.0	1.2996226474591044	1.3117538610557542
Chr6	2254217	2261787	Chr6_2254217_2261787_+	3.0	39.0	0	21.36842105263158	23.0	1.339817427167301	1.3710678622717363
Chr6	2261855	2267446	Chr6_2261855_2267446_-	19.0	23.0	0	26.29824561403509	27.0	1.4281063632421005	1.4393326938302626
Chr6	2267446	2271885	Chr6_2267446_2271885_-	25.0	17.0	0	30.2	32.0	1.4871383754771865	1.5118833609788744
Chr6	2268888	2270750	Chr6_2268888_2270750_+	34.0	8.0	0	32.15	32.0	1.5138831856110928	1.5118833609788744
Chr6	2271885	2276534	Chr6_2271885_2276534_-	19.0	23.0	0	27.6875	28.5	1.4500565592220358	1.462397997898956
Chr6	2276534	2282977	Chr6_2276534_2282977_-	25.0	17.0	0	20.015384615384615	20.0	1.3120796633830394	1.3117538610557542
Chr6	2282977	2299714	Chr6_2282977_2299714_-	20.0	22.0	0	20.23076923076923	20.0	1.3166154172159208	1.3117538610557542
Chr6	2288438	2295305	Chr6_2288438_2295305_-	22.0	20.0	0	22.285714285714285	22.5	1.357662647378943	1.3617278360175928
Chr6	2299714	2300447	Chr6_2299714_2300447_-	18.0	24.0	0	18.375	19.0	1.275886960301226	1.290034611362518
Chr6	2300447	2303575	Chr6_2300447_2303575_-	12.0	30.0	0	25.84375	28.0	1.4206775963048364	1.4548448600085102
Chr6	2303584	2303779	Chr6_2303584_2303779_-	18.0	24.0	0	16.666666666666668	16.0	1.2346859743215286	1.2174839442139063
Chr6	2303779	2303892	Chr6_2303779_2303892_-	16.0	26.0	0	17.0	17.0	1.2430380486862944	1.2430380486862944
Chr6	2303892	2305712	Chr6_2303892_2305712_+	18.0	24.0	0	21.15	21.5	1.3354579006893843	1.3424226808222062
Chr6	2305712	2318282	Chr6_2305712_2318282_-	18.0	24.0	0	18.96825396825397	18.0	1.2893270030888229	1.2671717284030137
Chr6	2310107	2317678	Chr6_2310107_2317678_+	17.0	25.0	0	20.05263157894737	19.5	1.3128674372604903	1.3010299956639813
Chr6	2318282	2323578	Chr6_2318282_2323578_-	22.0	20.0	0	24.5	23.0	1.3979400086720377	1.3710678622717363
Chr6	2323578	2330754	Chr6_2323578_2330754_-	17.0	25.0	0	18.986301369863014	20.0	1.289729414946653	1.3117538610557542
Chr6	2330754	2332880	Chr6_2330754_2332880_-	13.0	29.0	0	25.681818181818183	30.5	1.4179998026010059	1.4913616938342726
Chr6	2332882	2333389	Chr6_2332882_2333389_+	7.0	35.0	0	5.833333333333333	3.0	0.8016323462331665	0.5440680443502757
Chr6	2333391	2333532	Chr6_2333391_2333532_-	3.0	39.0	0	3.3333333333333335	3.0	0.5835765856339493	0.5440680443502757
Chr6	2367866	2367982	Chr6_2367866_2367982_-	0.0	43.0	0	0.0	0.0	-0.3010299956639812	-0.3010299956639812
Chr6	2607249	2607453	Chr6_2607249_2607453_+	0.0	43.0	0	0.0	0.0	-0.3010299956639812	-0.3010299956639812
Chr6	2607970	2608115	Chr6_2607970_2608115_-	0.0	43.0	0	0.0	0.0	-0.3010299956639812	-0.3010299956639812
Chr6	2658425	2664298	Chr6_2658425_2664298_-	1.0	41.0	0	15.457627118644067	16.0	1.2029683127105395	1.2174839442139063
Chr6	2729459	2729658	Chr6_2729459_2729658_-	1.0	41.0	0	16.333333333333332	20.0	1.226170123398999	1.3117538610557542
Chr6	2730655	2730858	Chr6_2730655_2730858_+	5.0	37.0	0	1.6666666666666667	0.0	0.3357921019231932	-0.3010299956639812
Chr6	2730877	2731000	Chr6_2730877_2731000_+	0.0	43.0	0	0.0	0.0	-0.3010299956639812	-0.3010299956639812
Chr6	2777404	2777683	Chr6_2777404_2777683_-	0.0	43.0	0	0.3333333333333333	0.0	-0.07918124604762487	-0.3010299956639812
Chr6	2794798	2795047	Chr6_2794798_2795047_-	0.0	43.0	0	0.0	0.0	-0.3010299956639812	-0.3010299956639812
Chr6	2795435	2795548	Chr6_2795435_2795548_+	0.0	43.0	0	0.0	0.0	-0.3010299956639812	-0.3010299956639812
Chr6	2795654	2796024	Chr6_2795654_2796024_-	0.0	43.0	0	0.0	0.0	-0.3010299956639812	-0.3010299956639812
Chr6	2796058	2796184	Chr6_2796058_2796184_+	0.0	43.0	0	1.5	1.5	0.3010299956639812	0.3010299956639812
Chr6	2810641	2817394	Chr6_2810641_2817394_-	0.0	43.0	0	23.91176470588235	23.0	1.3875991753338188	1.3710678622717363
Chr6	2810962	2812819	Chr6_2810962_2812819_+	19.0	23.0	0	30.95	32.0	1.4976206497812876	1.5118833609788744
Chr6	2817496	2817652	Chr6_2817496_2817652_-	12.0	30.0	0	12.0	12.0	1.0969100130080565	1.0969100130080565
Chr6	2832466	2832639	Chr6_2832466_2832639_-	0.0	43.0	0	0.0	0.0	-0.3010299956639812	-0.3010299956639812
Chr6	2850710	2850950	Chr6_2850710_2850950_-	0.0	43.0	0	0.0	0.0	-0.3010299956639812	-0.3010299956639812
Chr6	2944834	2944975	Chr6_2944834_2944975_+	0.0	43.0	0	0.0	0.0	-0.3010299956639812	-0.3010299956639812
Chr6	2945082	2945330	Chr6_2945082_2945330_-	0.0	43.0	0	0.0	0.0	-0.3010299956639812	-0.3010299956639812
Chr6	2980051	2980263	Chr6_2980051_2980263_+	0.0	43.0	0	0.0	0.0	-0.3010299956639812	-0.3010299956639812
Chr6	3021703	3021906	Chr6_3021703_3021906_-	0.0	43.0	0	0.0	0.0	-0.3010299956639812	-0.3010299956639812
Chr6	3022013	3022745	Chr6_3022013_3022745_-	0.0	43.0	0	0.0	0.0	-0.3010299956639812	-0.3010299956639812
Chr6	3067701	3067820	Chr6_3067701_3067820_-	7.0	35.0	1	7.0	7.0	0.8750612633917001	0.8750612633917001
Chr6	3068178	3068739	Chr6_3068178_3068739_+	7.0	35.0	1	7.0	7.0	0.8750612633917001	0.8750612633917001
Chr6	3068857	3070132	Chr6_3068857_3070132_-	11.0	31.0	1	15.357142857142858	17.0	1.2002249387724007	1.2430380486862944
Chr6	3070132	3076863	Chr6_3070132_3076863_-	2.0	40.0	0	10.132352941176471	10.5	1.0266293845882946	1.0413926851582251
Chr6	3076870	3083737	Chr6_3076870_3083737_+	9.0	33.0	0	22.914285714285715	25.0	1.3694809135562422	1.4065401804339552
Chr6	3083833	3085265	Chr6_3083833_3085265_-	17.0	25.0	0	15.866666666666667	16.0	1.213960237403306	1.2174839442139063
Chr6	3090445	3090657	Chr6_3090445_3090657_+	16.0	26.0	0	16.0	16.0	1.2174839442139063	1.2174839442139063
Chr6	3093572	3093980	Chr6_3093572_3093980_-	17.0	25.0	0	18.6	19.0	1.2810333672477277	1.290034611362518
Chr6	3094509	3094717	Chr6_3094509_3094717_-	17.0	25.0	0	11.333333333333334	16.0	1.0731070983354316	1.2174839442139063
Chr6	3110834	3112691	Chr6_3110834_3112691_-	1.0	41.0	1	28.68421052631579	32.0	1.4651479495323498	1.5118833609788744
Chr6	3114167	3114324	Chr6_3114167_3114324_-	0.0	43.0	1	0.0	0.0	-0.3010299956639812	-0.3010299956639812
Chr6	3118748	3118874	Chr6_3118748_3118874_-	0.0	43.0	1	0.0	0.0	-0.3010299956639812	-0.3010299956639812
Chr6	3123543	3123668	Chr6_3123543_3123668_+	0.0	43.0	0	0.0	0.0	-0.3010299956639812	-0.3010299956639812
Chr6	3144166	3144374	Chr6_3144166_3144374_-	0.0	43.0	0	9.333333333333334	0.0	0.9927007612585006	-0.3010299956639812
Chr6	3159009	3159125	Chr6_3159009_3159125_-	0.0	43.0	0	0.0	0.0	-0.3010299956639812	-0.3010299956639812
Chr6	3163355	3163550	Chr6_3163355_3163550_-	0.0	43.0	1	0.0	0.0	-0.3010299956639812	-0.3010299956639812
Chr6	3167080	3168547	Chr6_3167080_3168547_-	0.0	43.0	1	0.25	0.0	-0.12493873660829995	-0.3010299956639812
Chr6	3170505	3170740	Chr6_3170505_3170740_+	0.0	43.0	1	0.0	0.0	-0.3010299956639812	-0.3010299956639812
Chr6	3170919	3171527	Chr6_3170919_3171527_-	1.0	41.0	1	0.5714285714285714	1.0	0.029963223377443202	0.17609125905568124
Chr6	3171546	3171709	Chr6_3171546_3171709_-	0.0	43.0	1	0.0	0.0	-0.3010299956639812	-0.3010299956639812
Chr6	3174939	3175117	Chr6_3174939_3175117_+	0.0	43.0	1	0.0	0.0	-0.3010299956639812	-0.3010299956639812
Chr6	3177426	3178331	Chr6_3177426_3178331_+	0.0	43.0	1	0.0	0.0	-0.3010299956639812	-0.3010299956639812
Chr6	3179306	3179710	Chr6_3179306_3179710_+	17.0	25.0	1	14.6	17.0	1.1789769472931695	1.2430380486862944
Chr6	3179710	3179979	Chr6_3179710_3179979_+	4.0	38.0	1	6.666666666666667	6.0	0.8553172051959429	0.8129133566428556
Chr6	3180145	3185672	Chr6_3180145_3185672_-	16.0	26.0	1	27.589285714285715	28.0	1.4485406956170865	1.4548448600085102
Chr6	3185677	3185903	Chr6_3185677_3185903_-	8.0	34.0	1	2.0	0.0	0.3979400086720376	-0.3010299956639812
Chr6	3187726	3187848	Chr6_3187726_3187848_+	0.0	43.0	1	0.0	0.0	-0.3010299956639812	-0.3010299956639812
Chr6	3212526	3220009	Chr6_3212526_3220009_+	0.0	43.0	1	20.907894736842106	21.0	1.3305739606560674	1.3324384599156054
Chr6	3220160	3220310	Chr6_3220160_3220310_-	0.0	43.0	1	0.0	0.0	-0.3010299956639812	-0.3010299956639812
Chr6	3229447	3229593	Chr6_3229447_3229593_-	0.0	43.0	1	0.0	0.0	-0.3010299956639812	-0.3010299956639812
Chr6	3259088	3259313	Chr6_3259088_3259313_+	19.0	23.0	0	5.75	2.0	0.7958800173440752	0.3979400086720376
Chr6	3259496	3259626	Chr6_3259496_3259626_+	0.0	43.0	0	0.0	0.0	-0.3010299956639812	-0.3010299956639812
Chr6	3272844	3273007	Chr6_3272844_3273007_-	0.0	43.0	0	0.0	0.0	-0.3010299956639812	-0.3010299956639812
Chr6	3304458	3304634	Chr6_3304458_3304634_+	0.0	43.0	0	0.0	0.0	-0.3010299956639812	-0.3010299956639812
Chr6	3370294	3370479	Chr6_3370294_3370479_-	0.0	43.0	1	0.0	0.0	-0.3010299956639812	-0.3010299956639812
Chr6	3376153	3376308	Chr6_3376153_3376308_+	0.0	43.0	1	0.0	0.0	-0.3010299956639812	-0.3010299956639812
Chr6	3379113	3379322	Chr6_3379113_3379322_+	0.0	43.0	1	0.0	0.0	-0.3010299956639812	-0.3010299956639812
Chr6	3380690	3380868	Chr6_3380690_3380868_+	0.0	43.0	1	0.0	0.0	-0.3010299956639812	-0.3010299956639812
Chr6	3380927	3381043	Chr6_3380927_3381043_-	0.0	43.0	1	3.0	3.0	0.5440680443502757	0.5440680443502757
Chr6	3383442	3383571	Chr6_3383442_3383571_+	0.0	43.0	1	0.0	0.0	-0.3010299956639812	-0.3010299956639812
Chr6	3436881	3437067	Chr6_3436881_3437067_-	0.0	43.0	0	2.3333333333333335	1.0	0.4522976709946303	0.17609125905568124
Chr6	3437179	3437300	Chr6_3437179_3437300_-	9.0	33.0	0	13.0	13.0	1.130333768495006	1.130333768495006
Chr6	3437404	3438041	Chr6_3437404_3438041_+	16.0	26.0	0	14.428571428571429	16.0	1.174018250432816	1.2174839442139063
Chr6	3438612	3438727	Chr6_3438612_3438727_-	14.0	28.0	0	15.0	15.0	1.1903316981702914	1.1903316981702914
Chr6	3438727	3438993	Chr6_3438727_3438993_+	16.0	26.0	0	22.666666666666668	26.0	1.3648635498704516	1.423245873936808
Chr6	3439030	3439663	Chr6_3439030_3439663_-	19.0	23.0	0	12.0	11.0	1.0969100130080565	1.0606978403536116
Chr6	3439663	3444795	Chr6_3439663_3444795_+	23.0	19.0	0	19.365384615384617	20.5	1.2980969778848215	1.3222192947339193
Chr6	3440086	3440861	Chr6_3440086_3440861_-	33.0	9.0	0	21.11111111111111	20.0	1.3346770962224017	1.3117538610557542
Chr6	3444832	3445026	Chr6_3444832_3445026_-	24.0	18.0	0	18.333333333333332	17.0	1.274927193099776	1.2430380486862944
Chr6	3445026	3445502	Chr6_3445026_3445502_+	14.0	28.0	0	15.5	16.0	1.2041199826559248	1.2174839442139063
Chr6	3445502	3451485	Chr6_3445502_3451485_+	17.0	25.0	0	19.183333333333334	18.0	1.2940986472298712	1.2671717284030137
Chr6	3451485	3451961	Chr6_3451485_3451961_+	22.0	20.0	0	16.166666666666668	17.0	1.2218487496163564	1.2430380486862944
Chr6	3451961	3452409	Chr6_3451961_3452409_-	12.0	30.0	0	13.0	11.0	1.130333768495006	1.0606978403536116
Chr6	3452416	3457618	Chr6_3452416_3457618_+	10.0	32.0	0	18.32075471698113	19.0	1.2746370347579967	1.290034611362518
Chr6	3457618	3458091	Chr6_3457618_3458091_+	8.0	34.0	0	7.8	8.0	0.919078092376074	0.9294189257142927
Chr6	3458091	3458254	Chr6_3458091_3458254_+	10.0	32.0	0	21.666666666666668	27.0	1.3457003905834422	1.4393326938302626
Chr6	3458252	3462834	Chr6_3458252_3462834_-	28.0	14.0	0	28.595744680851062	29.0	1.4638294770697509	1.469822015978163
Chr6	3462834	3464014	Chr6_3462834_3464014_-	28.0	14.0	0	26.384615384615383	28.0	1.4295038277748635	1.4548448600085102
Chr6	3464008	3464647	Chr6_3464008_3464647_+	31.0	11.0	0	27.857142857142858	29.0	1.452662471084877	1.469822015978163
Chr6	3464684	3469696	Chr6_3464684_3469696_-	27.0	15.0	0	23.627450980392158	22.0	1.382511441940885	1.3521825181113625
Chr6	3468571	3469346	Chr6_3468571_3469346_+	34.0	8.0	0	34.333333333333336	34.0	1.5419950357274104	1.5378190950732742
Chr6	3469696	3477194	Chr6_3469696_3477194_+	30.0	12.0	0	24.18421052631579	25.0	1.3924192417622543	1.4065401804339552
Chr6	3474429	3476055	Chr6_3474429_3476055_+	15.0	27.0	0	27.058823529411764	29.0	1.440260673845523	1.469822015978163
Chr6	3477279	3477915	Chr6_3477279_3477915_+	26.0	16.0	0	20.5	24.5	1.3222192947339193	1.3979400086720377
Chr6	3477997	3479604	Chr6_3477997_3479604_-	30.0	12.0	0	31.22222222222222	31.0	1.501363603142542	1.4983105537896004
Chr6	3479604	3480245	Chr6_3479604_3480245_+	31.0	11.0	0	27.142857142857142	29.0	1.4415829293406734	1.469822015978163
Chr6	3480249	3480569	Chr6_3480249_3480569_+	28.0	14.0	0	25.75	25.0	1.4191293077419758	1.4065401804339552
Chr6	3480568	3481514	Chr6_3480568_3481514_+	22.0	20.0	0	28.0	26.0	1.4548448600085102	1.423245873936808
Chr6	3481516	3488381	Chr6_3481516_3488381_+	37.0	5.0	0	22.956521739130434	23.0	1.3702636130013366	1.3710678622717363
Chr6	3488381	3490630	Chr6_3488381_3490630_+	30.0	12.0	0	27.041666666666668	28.5	1.4399902177740342	1.462397997898956
Chr6	3490606	3491028	Chr6_3490606_3491028_+	32.0	10.0	0	30.6	31.0	1.4927603890268375	1.4983105537896004
Chr6	3491232	3492046	Chr6_3491232_3492046_+	25.0	17.0	0	26.555555555555557	27.0	1.4322564561113282	1.4393326938302626
Chr6	3492065	3493927	Chr6_3492065_3493927_+	30.0	12.0	0	31.4	32.0	1.503790683057181	1.5118833609788744
Chr6	3493948	3495350	Chr6_3493948_3495350_+	27.0	15.0	0	28.933333333333334	29.0	1.4688394488579062	1.469822015978163
Chr6	3495350	3502246	Chr6_3495350_3502246_-	28.0	14.0	0	22.928571428571427	25.0	1.369745808033441	1.4065401804339552
Chr6	3502246	3502531	Chr6_3502246_3502531_+	27.0	15.0	0	29.25	29.5	1.4734869700645683	1.4771212547196624
Chr6	3502591	3503182	Chr6_3502591_3503182_+	31.0	11.0	0	27.714285714285715	30.0	1.4504690599482222	1.4842998393467859
Chr6	3503232	3504534	Chr6_3503232_3504534_+	29.0	13.0	0	28.571428571428573	30.0	1.463466373546982	1.4842998393467859
Chr6	3504573	3505280	Chr6_3504573_3505280_+	27.0	15.0	0	22.875	24.0	1.3687516195445555	1.3891660843645324
Chr6	3505294	3507739	Chr6_3505294_3507739_+	18.0	24.0	0	31.346153846153847	32.5	1.5030569888140621	1.5185139398778875
Chr6	3507749	3512315	Chr6_3507749_3512315_+	15.0	27.0	0	24.4468085106383	26.0	1.3970149934514033	1.423245873936808
Chr6	3512399	3513035	Chr6_3512399_3513035_-	28.0	14.0	0	23.75	25.5	1.3847117429382825	1.414973347970818
Chr6	3513035	3518141	Chr6_3513035_3518141_+	30.0	12.0	0	30.26923076923077	33.0	1.4881166390211256	1.5250448070368452
Chr6	3518178	3518818	Chr6_3518178_3518818_-	23.0	19.0	0	22.75	23.0	1.3664229572259727	1.3710678622717363
Chr6	3518815	3519381	Chr6_3518815_3519381_+	19.0	23.0	0	17.666666666666668	18.0	1.25927524755698	1.2671717284030137
Chr7	853	7720	Chr7_853_7720_-	7.0	35.0	0	23.228571428571428	26.0	1.3752715924371377	1.423245873936808
Chr7	12272	12399	Chr7_12272_12399_-	2.0	40.0	1	2.0	2.0	0.3979400086720376	0.3979400086720376
Chr7	48094	55006	Chr7_48094_55006_-	0.0	43.0	0	3.056338028169014	2.0	0.5510030337356049	0.3979400086720376
Chr7	74542	74708	Chr7_74542_74708_+	0.0	43.0	0	0.0	0.0	-0.3010299956639812	-0.3010299956639812
Chr7	223105	223313	Chr7_223105_223313_-	5.0	37.0	0	4.333333333333333	4.0	0.6842467475153124	0.6532125137753437
Chr7	272983	273251	Chr7_272983_273251_-	0.0	43.0	0	0.0	0.0	-0.3010299956639812	-0.3010299956639812
Chr7	273243	273451	Chr7_273243_273451_-	0.0	43.0	0	0.0	0.0	-0.3010299956639812	-0.3010299956639812
Chr7	340429	340608	Chr7_340429_340608_+	0.0	43.0	0	0.0	0.0	-0.3010299956639812	-0.3010299956639812
Chr7	359224	359389	Chr7_359224_359389_-	0.0	43.0	0	0.0	0.0	-0.3010299956639812	-0.3010299956639812
Chr7	436800	437022	Chr7_436800_437022_-	0.0	43.0	0	0.0	0.0	-0.3010299956639812	-0.3010299956639812
Chr7	437094	437301	Chr7_437094_437301_+	0.0	43.0	0	0.0	0.0	-0.3010299956639812	-0.3010299956639812
Chr7	441931	442062	Chr7_441931_442062_+	0.0	43.0	0	0.0	0.0	-0.3010299956639812	-0.3010299956639812
Chr7	442134	442310	Chr7_442134_442310_-	0.0	43.0	0	0.0	0.0	-0.3010299956639812	-0.3010299956639812
Chr7	451115	451313	Chr7_451115_451313_+	0.0	43.0	0	0.0	0.0	-0.3010299956639812	-0.3010299956639812
Chr7	480571	480748	Chr7_480571_480748_-	0.0	43.0	0	3.3333333333333335	5.0	0.5835765856339493	0.7403626894942439
Chr7	596440	596808	Chr7_596440_596808_+	0.0	43.0	0	0.0	0.0	-0.3010299956639812	-0.3010299956639812
Chr7	671482	671614	Chr7_671482_671614_+	0.0	43.0	0	0.0	0.0	-0.3010299956639812	-0.3010299956639812
Chr7	779063	779254	Chr7_779063_779254_-	0.0	43.0	0	0.0	0.0	-0.3010299956639812	-0.3010299956639812
Chr7	794693	794914	Chr7_794693_794914_-	0.0	43.0	0	0.0	0.0	-0.3010299956639812	-0.3010299956639812
Chr7	796542	796675	Chr7_796542_796675_-	0.0	43.0	0	0.0	0.0	-0.3010299956639812	-0.3010299956639812
Chr7	816297	816456	Chr7_816297_816456_+	0.0	43.0	0	0.0	0.0	-0.3010299956639812	-0.3010299956639812
Chr7	816658	816839	Chr7_816658_816839_-	0.0	43.0	0	0.0	0.0	-0.3010299956639812	-0.3010299956639812
Chr7	853367	853495	Chr7_853367_853495_-	0.0	43.0	0	5.0	5.0	0.7403626894942439	0.7403626894942439
Chr7	853510	854087	Chr7_853510_854087_+	17.0	25.0	0	16.333333333333332	17.0	1.226170123398999	1.2430380486862944
Chr7	854101	854229	Chr7_854101_854229_+	10.0	32.0	0	5.0	5.0	0.7403626894942439	0.7403626894942439
Chr7	937776	937974	Chr7_937776_937974_-	0.0	43.0	0	0.0	0.0	-0.3010299956639812	-0.3010299956639812
Chr7	1201683	1201793	Chr7_1201683_1201793_-	0.0	43.0	0	0.5	0.5	0.0	0.0
Chr7	1418959	1419150	Chr7_1418959_1419150_+	0.0	43.0	0	0.0	0.0	-0.3010299956639812	-0.3010299956639812
Chr7	1442883	1443083	Chr7_1442883_1443083_+	0.0	43.0	0	0.0	0.0	-0.3010299956639812	-0.3010299956639812
Chr7	1464813	1465003	Chr7_1464813_1465003_-	0.0	43.0	0	0.0	0.0	-0.3010299956639812	-0.3010299956639812
Chr7	1548713	1548927	Chr7_1548713_1548927_+	0.0	43.0	0	0.0	0.0	-0.3010299956639812	-0.3010299956639812
Chr7	1619287	1619921	Chr7_1619287_1619921_+	0.0	43.0	0	0.0	0.0	-0.3010299956639812	-0.3010299956639812
Chr7	1816758	1817014	Chr7_1816758_1817014_+	0.0	43.0	0	0.0	0.0	-0.3010299956639812	-0.3010299956639812
Chr7	1902323	1902571	Chr7_1902323_1902571_-	0.0	43.0	0	0.0	0.0	-0.3010299956639812	-0.3010299956639812
Chr7	1944454	1944928	Chr7_1944454_1944928_-	0.0	43.0	0	3.5	3.0	0.6020599913279624	0.5440680443502757
Chr7	1944928	1945151	Chr7_1944928_1945151_-	9.0	33.0	0	14.333333333333334	16.0	1.1712387562612692	1.2174839442139063
Chr7	1945126	1945761	Chr7_1945126_1945761_+	18.0	24.0	0	9.142857142857142	9.0	0.984205732816768	0.9777236052888477
Chr7	1945826	1955669	Chr7_1945826_1955669_+	13.0	29.0	0	20.88888888888889	21.0	1.3301882244051946	1.3324384599156054
Chr7	1955689	1961004	Chr7_1955689_1961004_-	18.0	24.0	0	20.545454545454547	20.0	1.323158310195747	1.3117538610557542
Chr7	1961004	1968569	Chr7_1961004_1968569_-	16.0	26.0	0	24.276315789473685	24.5	1.3940367277358734	1.3979400086720377
Chr7	1968569	1975941	Chr7_1968569_1975941_-	4.0	38.0	0	22.893333333333334	23.0	1.369092109159725	1.3710678622717363
Chr7	1975941	1980919	Chr7_1975941_1980919_+	19.0	23.0	0	21.11764705882353	21.0	1.3348084220419398	1.3324384599156054
Chr7	1980919	1982593	Chr7_1980919_1982593_+	6.0	36.0	0	12.705882352941176	14.0	1.120767423961068	1.1613680022349748
Chr7	1982593	1983696	Chr7_1982593_1983696_-	8.0	34.0	0	15.833333333333334	17.0	1.2130748253088512	1.2430380486862944
Chr7	1983696	1984983	Chr7_1983696_1984983_-	18.0	24.0	0	24.5	25.0	1.3979400086720377	1.4065401804339552
Chr7	1984986	1988959	Chr7_1984986_1988959_-	16.0	26.0	0	17.097560975609756	17.0	1.2454524787097776	1.2430380486862944
Chr7	1989061	1989208	Chr7_1989061_1989208_-	12.0	30.0	0	16.333333333333332	16.0	1.226170123398999	1.2174839442139063
Chr7	1989207	1990518	Chr7_1989207_1990518_-	21.0	21.0	0	23.714285714285715	21.5	1.3840716625248441	1.3424226808222062
Chr7	1990625	1991276	Chr7_1990625_1991276_-	6.0	36.0	0	2.5714285714285716	2.0	0.4873404199013485	0.3979400086720376
Chr7	1991252	1991868	Chr7_1991252_1991868_+	1.0	41.0	0	2.5714285714285716	2.0	0.4873404199013485	0.3979400086720376
Chr7	1991868	2001848	Chr7_1991868_2001848_-	3.0	39.0	0	16.762376237623762	17.0	1.2371005779293527	1.2430380486862944
Chr7	1992731	1992928	Chr7_1992731_1992928_+	13.0	29.0	0	13.666666666666666	13.0	1.151267675330649	1.130333768495006
Chr7	2001848	2002167	Chr7_2001848_2002167_+	3.0	39.0	0	2.0	2.0	0.3979400086720376	0.3979400086720376
Chr7	2002169	2002502	Chr7_2002169_2002502_-	3.0	39.0	0	6.6	9.0	0.8512583487190752	0.9777236052888477
Chr7	2006167	2006294	Chr7_2006167_2006294_+	2.0	40.0	0	2.0	2.0	0.3979400086720376	0.3979400086720376
Chr7	2006294	2008166	Chr7_2006294_2008166_-	2.0	40.0	0	8.35	9.0	0.9469432706978255	0.9777236052888477
Chr7	2008166	2009648	Chr7_2008166_2009648_+	2.0	40.0	0	25.0	27.5	1.4065401804339552	1.4471580313422192
Chr7	2009648	2012560	Chr7_2009648_2012560_+	22.0	20.0	0	18.366666666666667	22.0	1.275695176468609	1.3521825181113625
Chr7	2010175	2010814	Chr7_2010175_2010814_-	11.0	31.0	0	4.5	1.5	0.6989700043360189	0.3010299956639812
Chr7	2012563	2020134	Chr7_2012563_2020134_-	12.0	30.0	0	24.558441558441558	25.0	1.3989540577349335	1.4065401804339552
Chr7	2020134	2020817	Chr7_2020134_2020817_+	22.0	20.0	0	26.25	25.5	1.4273237863572472	1.414973347970818
Chr7	2020854	2021491	Chr7_2020854_2021491_-	20.0	22.0	0	15.571428571428571	16.0	1.2060544824331243	1.2174839442139063
Chr7	2021479	2026782	Chr7_2021479_2026782_-	16.0	26.0	0	27.35185185185185	29.0	1.444854076432655	1.469822015978163
Chr7	2026782	2028650	Chr7_2026782_2028650_+	35.0	7.0	0	18.6	18.0	1.2810333672477277	1.2671717284030137
Chr7	2028687	2029328	Chr7_2028687_2029328_-	14.0	28.0	0	14.875	15.0	1.1868151244474543	1.1903316981702914
Chr7	2029328	2030853	Chr7_2029328_2030853_-	16.0	26.0	0	28.25	32.5	1.4586378490256493	1.5185139398778875
Chr7	2030853	2038178	Chr7_2030853_2038178_-	12.0	30.0	0	13.121621621621621	14.0	1.1342288123785302	1.1613680022349748
Chr7	2031194	2031831	Chr7_2031194_2031831_+	9.0	33.0	0	6.0	6.5	0.8129133566428556	0.8450980400142568
Chr7	2031868	2036989	Chr7_2031868_2036989_-	4.0	38.0	0	15.23076923076923	16.5	1.196749960036524	1.2304489213782739
Chr7	2036989	2037624	Chr7_2036989_2037624_+	21.0	21.0	0	12.625	11.5	1.1180993120779945	1.0791812460476249
Chr7	2100185	2100301	Chr7_2100185_2100301_-	0.0	43.0	0	0.0	0.0	-0.3010299956639812	-0.3010299956639812
Chr7	2100308	2100697	Chr7_2100308_2100697_+	0.0	43.0	0	0.0	0.0	-0.3010299956639812	-0.3010299956639812
Chr7	2100793	2101013	Chr7_2100793_2101013_-	0.0	43.0	0	0.0	0.0	-0.3010299956639812	-0.3010299956639812
Chr7	2201107	2201355	Chr7_2201107_2201355_+	0.0	43.0	0	0.6666666666666666	0.0	0.06694678963061314	-0.3010299956639812
Chr7	2204903	2205143	Chr7_2204903_2205143_-	0.0	43.0	0	0.0	0.0	-0.3010299956639812	-0.3010299956639812
Chr7	2315778	2316060	Chr7_2315778_2316060_+	0.0	43.0	0	0.0	0.0	-0.3010299956639812	-0.3010299956639812
Chr7	2385220	2385463	Chr7_2385220_2385463_+	0.0	43.0	0	0.0	0.0	-0.3010299956639812	-0.3010299956639812
Chr7	2405353	2405475	Chr7_2405353_2405475_-	0.0	43.0	0	0.0	0.0	-0.3010299956639812	-0.3010299956639812
Chr7	2547349	2547472	Chr7_2547349_2547472_-	0.0	43.0	0	0.0	0.0	-0.3010299956639812	-0.3010299956639812
Chr7	2547866	2547993	Chr7_2547866_2547993_-	0.0	43.0	0	0.0	0.0	-0.3010299956639812	-0.3010299956639812
Chr7	2745700	2745904	Chr7_2745700_2745904_-	0.0	43.0	0	0.0	0.0	-0.3010299956639812	-0.3010299956639812
Chr7	2812139	2817661	Chr7_2812139_2817661_+	29.0	13.0	0	16.982142857142858	17.5	1.2425946647969375	1.255272505103306
Chr7	2843811	2843950	Chr7_2843811_2843950_+	0.0	43.0	0	0.0	0.0	-0.3010299956639812	-0.3010299956639812
Chr7	3041149	3041315	Chr7_3041149_3041315_-	0.0	43.0	0	0.0	0.0	-0.3010299956639812	-0.3010299956639812
Chr7	3042381	3042580	Chr7_3042381_3042580_-	0.0	43.0	0	0.0	0.0	-0.3010299956639812	-0.3010299956639812
Chr7	3054129	3054235	Chr7_3054129_3054235_+	0.0	43.0	0	0.5	0.5	0.0	0.0
Chr7	3054240	3054879	Chr7_3054240_3054879_-	1.0	41.0	0	25.571428571428573	29.0	1.4161648287782367	1.469822015978163
Chr7	3054962	3055599	Chr7_3054962_3055599_-	26.0	16.0	0	30.714285714285715	33.0	1.4943534012921837	1.5250448070368452
Chr7	3055599	3060052	Chr7_3055599_3060052_+	36.0	6.0	0	35.91304347826087	37.0	1.5612569796912898	1.5740312677277188
Chr7	3060056	3060694	Chr7_3060056_3060694_-	12.0	30.0	0	8.0	8.0	0.9294189257142927	0.9294189257142927
Chr7	3060690	3061388	Chr7_3060690_3061388_+	3.0	39.0	0	19.625	19.0	1.3037358890399062	1.290034611362518
Chr7	3061425	3062068	Chr7_3061425_3062068_-	18.0	24.0	0	21.428571428571427	18.0	1.3410103397989483	1.2671717284030137
Chr7	3062079	3062363	Chr7_3062079_3062363_-	31.0	11.0	0	32.5	33.0	1.5185139398778875	1.5250448070368452
Chr7	3062881	3063332	Chr7_3062881_3063332_+	28.0	14.0	0	26.0	26.0	1.423245873936808	1.423245873936808
Chr7	3065081	3065551	Chr7_3065081_3065551_-	29.0	13.0	0	27.833333333333332	28.0	1.4522976709946303	1.4548448600085102
Chr7	3065568	3065727	Chr7_3065568_3065727_+	28.0	14.0	0	31.333333333333332	32.0	1.5028821168640838	1.5118833609788744
Chr7	3065801	3066236	Chr7_3065801_3066236_+	38.0	4.0	0	37.8	38.0	1.5831987739686226	1.5854607295085006
Chr7	3066230	3066519	Chr7_3066230_3066519_+	36.0	6.0	0	30.25	30.5	1.4878451201114355	1.4913616938342726
Chr7	3066558	3069751	Chr7_3066558_3069751_+	25.0	17.0	0	30.727272727272727	32.0	1.4945340562373441	1.5118833609788744
Chr7	3069761	3070149	Chr7_3069761_3070149_+	30.0	12.0	0	33.8	35.0	1.5352941200427705	1.550228353055094
Chr7	3070353	3071218	Chr7_3070353_3071218_+	32.0	10.0	0	32.4	32.5	1.5171958979499742	1.5185139398778875
Chr7	3071239	3078106	Chr7_3071239_3078106_-	29.0	13.0	0	22.7	22.5	1.3654879848908996	1.3617278360175928
Chr7	3078106	3079788	Chr7_3078106_3079788_+	33.0	9.0	0	33.35294117647059	33.0	1.5295964065875367	1.5250448070368452
Chr7	3079850	3080439	Chr7_3079850_3080439_+	30.0	12.0	0	28.857142857142858	30.0	1.467713786197831	1.4842998393467859
Chr7	3080489	3081791	Chr7_3080489_3081791_+	30.0	12.0	0	31.357142857142858	31.0	1.503206823033904	1.4983105537896004
Chr7	3081830	3082537	Chr7_3081830_3082537_+	28.0	14.0	0	22.75	21.0	1.3664229572259727	1.3324384599156054
Chr7	3082553	3082658	Chr7_3082553_3082658_-	19.0	23.0	0	26.0	26.0	1.423245873936808	1.423245873936808
Chr7	3082658	3082914	Chr7_3082658_3082914_+	33.0	9.0	0	31.75	32.5	1.5085297189712865	1.5185139398778875
Chr7	3082742	3082851	Chr7_3082742_3082851_-	33.0	9.0	0	32.5	32.5	1.5185139398778875	1.5185139398778875
Chr7	3083173	3083603	Chr7_3083173_3083603_-	20.0	22.0	0	29.166666666666668	30.0	1.4722687519252504	1.4842998393467859
Chr7	3083604	3084240	Chr7_3083604_3084240_+	35.0	7.0	0	35.0	35.0	1.550228353055094	1.550228353055094
Chr7	3084233	3085289	Chr7_3084233_3085289_-	35.0	7.0	0	32.54545454545455	33.0	1.5191117300368315	1.5250448070368452
Chr7	3085270	3085926	Chr7_3085270_3085926_+	31.0	11.0	0	26.5	31.0	1.4313637641589874	1.4983105537896004
Chr7	3085963	3095476	Chr7_3085963_3095476_-	36.0	6.0	0	25.5	27.0	1.414973347970818	1.4393326938302626
Chr7	3086211	3093722	Chr7_3086211_3093722_-	13.0	29.0	0	24.763157894736842	25.5	1.4024876364227583	1.414973347970818
Chr7	3095576	3098551	Chr7_3095576_3098551_-	40.0	2.0	0	37.16129032258065	38.0	1.5758951954038771	1.5854607295085006
Chr7	3098551	3099051	Chr7_3098551_3099051_+	37.0	5.0	0	31.5	31.5	1.505149978319906	1.505149978319906
Chr7	3099051	3099572	Chr7_3099051_3099572_+	31.0	11.0	0	33.833333333333336	34.0	1.5357159699855099	1.5378190950732742
Chr7	3099572	3100280	Chr7_3099572_3100280_-	36.0	6.0	0	23.75	23.5	1.3847117429382825	1.380211241711606
Chr7	3100336	3101635	Chr7_3100336_3101635_-	31.0	11.0	0	29.714285714285715	30.0	1.4802123316968043	1.4842998393467859
Chr7	3101896	3102531	Chr7_3101896_3102531_-	30.0	12.0	0	22.875	22.5	1.3687516195445555	1.3617278360175928
Chr7	3102531	3107683	Chr7_3102531_3107683_+	21.0	21.0	0	19.192307692307693	19.0	1.2942966130050129	1.290034611362518
Chr7	3102944	3103719	Chr7_3102944_3103719_-	17.0	25.0	0	14.11111111111111	14.0	1.1646832433864518	1.1613680022349748
Chr7	3107687	3108324	Chr7_3107687_3108324_-	20.0	22.0	0	14.0	11.5	1.1613680022349748	1.0791812460476249
Chr7	3108311	3111415	Chr7_3108311_3111415_-	25.0	17.0	0	30.5	32.0	1.4913616938342726	1.5118833609788744
Chr7	3112017	3115209	Chr7_3112017_3115209_-	35.0	7.0	0	29.848484848484848	30.0	1.4821370137517076	1.4842998393467859
Chr7	3115213	3115534	Chr7_3115213_3115534_-	27.0	15.0	0	30.25	31.0	1.4878451201114355	1.4983105537896004
Chr7	3115532	3116028	Chr7_3115532_3116028_+	31.0	11.0	0	26.833333333333332	27.0	1.4366925976640543	1.4393326938302626
Chr7	3116112	3116748	Chr7_3116112_3116748_-	17.0	25.0	0	11.142857142857142	9.0	1.0660595687257197	0.9777236052888477
Chr7	3117076	3117253	Chr7_3117076_3117253_+	29.0	13.0	0	20.666666666666668	28.0	1.3256524705723132	1.4548448600085102
Chr7	3117249	3117358	Chr7_3117249_3117358_+	5.0	37.0	0	2.5	2.5	0.47712125471966244	0.47712125471966244
Chr7	3160861	3161117	Chr7_3160861_3161117_-	0.0	43.0	0	0.5	0.5	0.0	0.0
Chr7	3197201	3198051	Chr7_3197201_3198051_+	0.0	43.0	0	1.6666666666666667	0.0	0.3357921019231932	-0.3010299956639812
Chr7	3211381	3212421	Chr7_3211381_3212421_+	1.0	41.0	1	7.416666666666667	4.5	0.8985423592412229	0.6989700043360189
Chr7	3211464	3211890	Chr7_3211464_3211890_-	5.0	37.0	1	3.0	2.0	0.5440680443502757	0.3979400086720376
Chr7	3212209	3212710	Chr7_3212209_3212710_-	4.0	38.0	1	3.6666666666666665	3.5	0.619788758288394	0.6020599913279624
Chr7	3213042	3213235	Chr7_3213042_3213235_+	0.0	43.0	1	0.0	0.0	-0.3010299956639812	-0.3010299956639812
Chr8	77	505	Chr8_77_505_-	35.0	8.0	1	29.666666666666668	29.5	1.479527324485541	1.4771212547196624
Chr8	27027	27234	Chr8_27027_27234_+	0.0	43.0	1	0.3333333333333333	0.0	-0.07918124604762487	-0.3010299956639812
Chr8	31617	31858	Chr8_31617_31858_-	0.0	43.0	1	0.0	0.0	-0.3010299956639812	-0.3010299956639812
Chr8	32029	32235	Chr8_32029_32235_+	0.0	43.0	1	0.3333333333333333	0.0	-0.07918124604762487	-0.3010299956639812
Chr8	100510	107339	Chr8_100510_107339_-	2.0	40.0	0	4.869565217391305	3.0	0.7299391215780917	0.5440680443502757
Chr8	180119	180260	Chr8_180119_180260_-	0.0	43.0	0	0.0	0.0	-0.3010299956639812	-0.3010299956639812
Chr8	180302	180552	Chr8_180302_180552_-	0.0	43.0	0	0.0	0.0	-0.3010299956639812	-0.3010299956639812
Chr8	246236	252109	Chr8_246236_252109_+	0.0	43.0	0	16.0	16.0	1.2174839442139063	1.2174839442139063
Chr8	274892	275210	Chr8_274892_275210_-	0.0	43.0	0	0.0	0.0	-0.3010299956639812	-0.3010299956639812
Chr8	332366	332639	Chr8_332366_332639_+	0.0	43.0	0	0.0	0.0	-0.3010299956639812	-0.3010299956639812
Chr8	332840	333104	Chr8_332840_333104_+	0.0	43.0	0	0.0	0.0	-0.3010299956639812	-0.3010299956639812
Chr8	365136	365318	Chr8_365136_365318_+	0.0	43.0	0	0.0	0.0	-0.3010299956639812	-0.3010299956639812
Chr8	422038	423895	Chr8_422038_423895_-	0.0	43.0	1	28.736842105263158	32.0	1.4659304623240574	1.5118833609788744
Chr8	470206	470413	Chr8_470206_470413_-	7.0	35.0	0	8.666666666666666	7.0	0.9622114391106001	0.8750612633917001
Chr8	478320	478533	Chr8_478320_478533_+	11.0	31.0	0	10.0	11.0	1.021189299069938	1.0606978403536116
Chr8	514891	515047	Chr8_514891_515047_+	0.0	43.0	0	6.666666666666667	8.0	0.8553172051959429	0.9294189257142927
Chr8	515162	515923	Chr8_515162_515923_+	8.0	34.0	0	12.88888888888889	12.0	1.1267445374715623	1.0969100130080565
Chr8	515923	516079	Chr8_515923_516079_+	6.0	36.0	0	3.0	3.0	0.5440680443502757	0.5440680443502757
Chr8	520855	521033	Chr8_520855_521033_+	0.0	43.0	1	0.0	0.0	-0.3010299956639812	-0.3010299956639812
Chr8	523881	524081	Chr8_523881_524081_-	0.0	43.0	1	0.0	0.0	-0.3010299956639812	-0.3010299956639812
Chr8	586548	586808	Chr8_586548_586808_-	0.0	43.0	0	6.75	6.5	0.8603380065709937	0.8450980400142568
Chr8	639302	639502	Chr8_639302_639502_+	0.0	43.0	0	0.0	0.0	-0.3010299956639812	-0.3010299956639812
Chr8	640788	640913	Chr8_640788_640913_+	0.0	43.0	0	0.0	0.0	-0.3010299956639812	-0.3010299956639812
Chr8	641827	642062	Chr8_641827_642062_-	0.0	43.0	0	0.6666666666666666	0.0	0.06694678963061314	-0.3010299956639812
Chr8	663861	664044	Chr8_663861_664044_+	0.0	43.0	0	0.0	0.0	-0.3010299956639812	-0.3010299956639812
Chr8	697958	698090	Chr8_697958_698090_+	3.0	39.0	0	1.5	1.5	0.3010299956639812	0.3010299956639812
Chr8	724912	725176	Chr8_724912_725176_+	16.0	26.0	0	14.333333333333334	16.0	1.1712387562612692	1.2174839442139063
Chr8	725549	726320	Chr8_725549_726320_-	5.0	37.0	0	24.22222222222222	29.0	1.3930875058776255	1.469822015978163
Chr8	726373	729000	Chr8_726373_729000_-	30.0	12.0	0	32.629629629629626	32.0	1.5202165807444044	1.5118833609788744
Chr8	729000	735709	Chr8_729000_735709_-	20.0	22.0	0	20.16176470588235	20.0	1.3151674115348624	1.3117538610557542
Chr8	729299	729454	Chr8_729299_729454_-	9.0	33.0	0	17.0	16.0	1.2430380486862944	1.2174839442139063
Chr8	735693	735874	Chr8_735693_735874_-	13.0	29.0	0	9.666666666666666	8.0	1.0071785846271233	0.9294189257142927
Chr8	735874	737281	Chr8_735874_737281_-	8.0	34.0	0	32.06666666666667	35.0	1.5127733089991107	1.550228353055094
Chr8	737281	739143	Chr8_737281_739143_+	33.0	9.0	0	32.0	32.0	1.5118833609788744	1.5118833609788744
Chr8	739143	739681	Chr8_739143_739681_-	33.0	9.0	0	34.333333333333336	34.5	1.5419950357274104	1.5440680443502757
Chr8	740283	740778	Chr8_740283_740778_-	32.0	10.0	0	30.0	31.0	1.4842998393467859	1.4983105537896004
Chr8	740785	741239	Chr8_740785_741239_-	29.0	13.0	0	28.0	28.5	1.4548448600085102	1.462397997898956
Chr8	741238	747199	Chr8_741238_747199_-	30.0	12.0	0	20.433333333333334	18.0	1.3208383890175337	1.2671717284030137
Chr8	747199	747652	Chr8_747199_747652_-	29.0	13.0	0	28.0	29.0	1.4548448600085102	1.469822015978163
Chr8	747730	748367	Chr8_747730_748367_-	4.0	38.0	0	12.0	13.0	1.0969100130080565	1.130333768495006
Chr8	748367	753497	Chr8_748367_753497_+	15.0	27.0	0	20.134615384615383	20.0	1.3145963783311518	1.3117538610557542
Chr8	753501	754140	Chr8_753501_754140_-	25.0	17.0	0	19.714285714285715	20.0	1.3056583998460523	1.3117538610557542
Chr8	754138	754838	Chr8_754138_754838_-	16.0	26.0	0	21.875	21.0	1.3497630439879496	1.3324384599156054
Chr8	754837	756178	Chr8_754837_756178_-	30.0	12.0	0	30.142857142857142	30.0	1.4863292565064863	1.4842998393467859
Chr8	756192	756895	Chr8_756192_756895_-	29.0	13.0	0	25.875	26.0	1.421192468305749	1.423245873936808
Chr8	756934	758224	Chr8_756934_758224_-	29.0	13.0	0	32.142857142857146	32.5	1.5137881643916122	1.5185139398778875
Chr8	758286	758875	Chr8_758286_758875_-	35.0	7.0	0	36.0	35.0	1.5622928644564746	1.550228353055094
Chr8	758934	761500	Chr8_758934_761500_-	37.0	5.0	0	28.923076923076923	29.0	1.4686880871827996	1.469822015978163
Chr8	761704	762092	Chr8_761704_762092_-	36.0	6.0	0	34.0	35.0	1.5378190950732742	1.550228353055094
Chr8	762102	763287	Chr8_762102_763287_-	30.0	12.0	0	27.166666666666668	29.0	1.4419568376564116	1.469822015978163
Chr8	763286	764457	Chr8_763286_764457_-	35.0	7.0	0	31.307692307692307	32.0	1.5025321615817286	1.5118833609788744
Chr8	764459	766316	Chr8_764459_766316_-	33.0	9.0	0	32.0	32.0	1.5118833609788744	1.5118833609788744
Chr8	766317	767157	Chr8_766317_767157_-	31.0	11.0	0	25.77777777777778	28.0	1.4195886356345055	1.4548448600085102
[truncated: 221 more rows]
