# Supplementary material for: A unique chromatin profile defines adaptive genomic regions in a fungal plant pathogen
Source: eLife journal article supplement (doi:10.7554/elife.62208), 2020-12-18
Supplement: supp [file elife-62208-supp-v1.zip › elife_poa_e62208_Figure_7_figure_supplement_1.pdf]

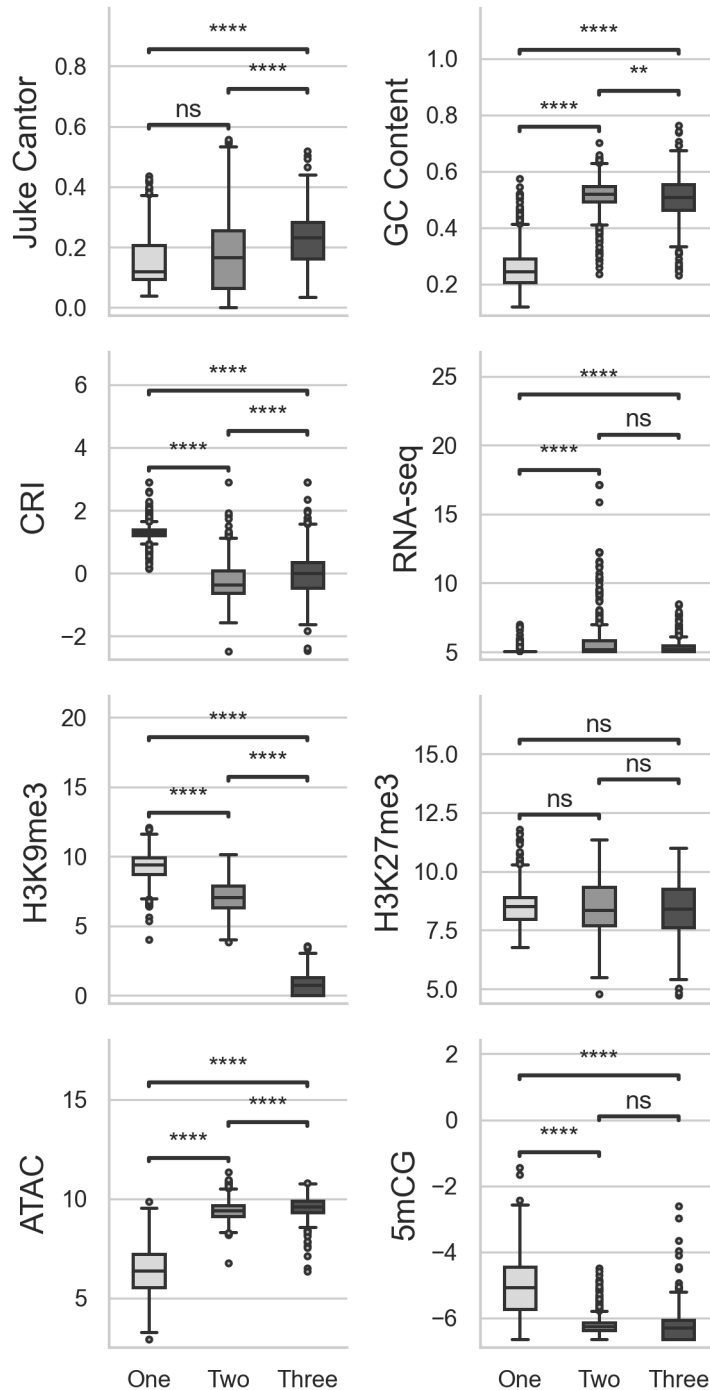

Figure 7- figure supplement 1. Multiple comparisons of TEs in UMAP groups for genomic variables. GC content, GC sequence fraction; Jukes Cantor, corrected Jukes Cantor distance of TE comparisons; CRI, Composite RIP index; RNAseq, variance stabilizing transformed log2 RNA-sequencing reads from Xylem-media grown fungus; H3K9me3 and H3K27me3 and ATAC-seq, TPM values of mapped reads from H3K9me3 ChIP-seq, H3K27me3 ChIP-seq, or Assay for transposase accessible chromatin respectively; 5mCG, log2 weighted cytosine DNA methylation+0.01 for CG. Pairwise comparisons were performed using Conover's test, with Holm multiple testing correction. \*\*, p-value < 0.01; \*\*\*\*, p-value < 0.0001. ns, Non-significant p-value at  $\alpha = .05$ .
