# Supplementary material for: A unique chromatin profile defines adaptive genomic regions in a fungal plant pathogen
Source: eLife journal article supplement (doi:10.7554/elife.62208), 2020-12-18
Supplement: supp [file elife-62208-supp-v1.zip › elife_poa_e62208_Figure_7_source_data_1.txt]

Chrom	start	end	Element_class	JukeC	gc_frct	CRI	vst.X.med	lg2.TPM.K9	lg2.TPM.K27	lg2.TPM.atac	lg2whgt_mCG	Absent_mean	umap_g	LS_core
Chr1	53070	53543	LTR	0.33961048096192403	0.308668076109937	1.55817672930828	5.03065184543009	9.90214105769354	8.32054189148646	7.25141425319001	-4.9613077234534	2.0	One	Core
Chr1	53543	59523	LTR	0.33234753625632396	0.2438127090301	1.2933850345703302	5.03065184543009	9.74234937876858	8.1110323343482	6.001496044946481	-4.787231506466231	11.80327868852459	One	Core
Chr1	59523	59996	LTR	0.343655102040816	0.26427061310782196	1.45242502776749	5.03065184543009	10.0985804226136	8.53988624504535	7.05556834493824	-4.95580019608947	8.0	One	Core
Chr1	60564	62834	Unsp	0.28971992031872495	0.28942731277533	1.4518060816387002	5.03065184543009	10.9788811438554	8.616817640240411	6.86362775433382	-4.58647829869715	26.583333333333332	One	Core
Chr1	67298	67935	Unsp	0.17957846616541398	0.39246467817896397	0.673655913978495	5.09975004453444	10.6362979812349	7.997030735923509	7.68002047437975	-5.66039832888922	16.375	One	Core
Chr1	68221	75736	LTR	0.0911065209905973	0.23131245836109304	1.3061617515639	5.03065184543009	10.032202512912901	8.42071747539273	5.956926502094739	-4.81411031065291	17.855263157894736	One	Core
Chr1	75547	75768	Unsp	0.25317770212766	0.24886877828054302	1.39015151515152	5.03065184543009	10.6425677882396	9.636205225660381	6.59427442714713	-6.643856189774719	6.666666666666667	One	Core
Chr1	76190	76498	Unsp	0.372278058252427	0.155844155844156	1.01864406779661	5.03065184543009	10.3346868845473	8.672349573886331	5.3603597462023895	-4.25007780986768	12.25	One	Core
Chr1	76508	88067	LTR	0.0989251337507114	0.24002313475997697	1.3238402818555501	5.03065184543009	9.96329742657049	8.42512518475886	7.26863837554987	-4.886426493048799	18.801724137931036	One	Core
Chr1	77329	87099	LTR	0.109092871125612	0.31740020470829106	1.4261925521196597	5.03065184543009	9.996680341476731	8.43574317561119	7.40682673611616	-4.72278665899644	19.836734693877553	One	Core
Chr1	87383	89131	Unsp	0.0736898514285714	0.231121281464531	1.29609502741175	5.03065184543009	9.57877109003126	8.62719341696136	6.03397491263289	-4.61077383481889	17.105263157894736	One	Core
Chr1	88037	93751	LTR	0.0814366153846154	0.21967040673211802	1.28499600467146	5.03065184543009	9.20235130995168	8.48266806643521	5.6632248734782005	-4.91916892538696	20.655172413793103	One	Core
Chr1	93751	94467	Unsp	0.303069277620397	0.24162011173184397	1.28548644338118	5.03065184543009	12.088444398817199	9.95162941770107	5.91645798246644	-4.886426493048799	8.625	One	Core
Chr1	94461	94827	LTR	0.144458914728682	0.28219178082191804	1.65896656534954	5.03065184543009	9.27664949321658	9.23324680740318	6.09638899369493	-4.38878306964361	7.8	One	Core
Chr1	94834	95062	Unsp	0.41367132420091296	0.16228070175438597	0.683333333333333	5.03065184543009	9.042736395594721	9.02144578560438	5.42509373343074	-4.45121111183233	27.666666666666668	One	Core
Chr1	95054	95417	Unsp	0.434941405405405	0.264462809917355	1.7888888888888899	5.03065184543009	9.63436946043759	7.94620732632632	6.80403905375929	-5.363748270581991	29.4	One	Core
Chr1	95418	95688	LTR	0.0824361090909091	0.325925925925926	1.7960829493087598	5.03065184543009	10.2652722505351	8.90837766300147	8.05851692296431	-4.52837897235479	14.666666666666666	One	Core
Chr1	219603	220043	Unsp	0.29697850230414696	0.6181818181818179	-0.4375	6.45806300170773	0.484504651819676	6.58900317860908	9.471371035832501	-6.24362890131636	0.0	Three	Core
Chr1	321817	322023	Unsp	0.19961622222222197	0.5533980582524269	0.6363636363636359	5.100184687091179	1.4379410420398602	9.71017873507301	9.55876494201906	-6.643856189774719	0.0	Three	Core
Chr1	325496	325621	Unsp	0.104350775193798	0.568	-0.0375939849624061	5.100184687091179	1.93580811349946	7.70958289127882	10.3903898878994	-6.10123063561103	0.0	Three	Core
Chr1	396076	396181	Unsp	0.25458260869565197	0.5619047619047621	-1.05454545454545	5.324619085542901	7.642361255341211	6.81403157289964	10.8187601073647	-6.3390016082463	0.0	Two	Core
Chr1	461447	462151	LTR	0.179252965686275	0.23295454545454503	1.26246105919003	5.03065184543009	7.50335715431768	8.55632378679519	6.9152468865606105	-4.95580019608947	5.625	One	Core
Chr1	462160	462636	LTR	0.051792828685259	0.51890756302521	-0.37866224433388596	5.03065184543009	8.421773766399731	7.515833392192321	9.231163412133	-6.43546359594301	15.166666666666666	Two	Core
Chr1	462707	463343	Unsp	0.13749055472263902	0.243710691823899	1.3219988172678898	5.10471848180467	8.83720738083027	8.298380175743441	6.649418166019941	-5.15917091751204	18.428571428571427	One	Core
Chr1	463343	468447	LTR	0.0556470485629336	0.18818599082019602	1.2571428571428602	5.03065184543009	8.65850841784407	8.20633220511659	5.16374834038766	-4.63103214941714	20.615384615384617	One	Core
Chr1	468440	469079	Unsp	0.0995878260869565	0.24256651017214398	1.32638888888889	5.03065184543009	9.077024429326789	8.48478108644621	6.168381528223901	-5.4968263985668395	14.285714285714286	One	Core
Chr1	470295	470503	Unsp	0.25129254545454505	0.447115384615385	1.51012145748988	5.03065184543009	8.18225967677092	9.01679742455514	9.116744292700162	-6.643856189774719	6.25	Two	Core
Chr1	472319	472467	LTR	0.16587086956521696	0.506756756756757	0.5	5.16928288619553	7.924532833198321	8.47590264168146	8.99809881645023	-6.643856189774719	4.5	Two	Core
Chr1	474513	474981	LTR	0.35537303797468395	0.26709401709401703	1.23596995139196	5.03065184543009	9.161808297996071	8.65554759426599	6.90678251285865	-4.80139746676121	17.8	One	Core
Chr1	474981	480965	LTR	0.391258267984998	0.240474598930481	1.31571330377919	5.03065184543009	8.77981996691293	8.45780649345966	6.12095128206482	-4.77836927105997	19.75409836065574	One	Core
Chr1	480965	481433	LTR	0.320130689655172	0.282051282051282	1.3198294243070399	5.03065184543009	9.02927307822368	8.44269468684556	6.60054843986582	-4.56189255926769	15.833333333333334	One	Core
Chr1	481433	483682	LTR	0.10161996784565899	0.20277777777777803	1.22582582582583	5.03065184543009	8.45478854726387	8.38001644807677	5.6913777338516	-4.98187763523835	19.47826086956522	One	Core
Chr1	484786	484990	Unsp	0.175845675675676	0.5686274509803921	-0.175	5.52990786135643	7.85989578212803	7.150778815557259	9.47718885341654	-6.423168074650531	2.3333333333333335	Two	Core
Chr1	538678	538842	LTR	0.271245325443787	0.45731707317073206	-0.424242424242424	5.362970710730679	8.74056272680488	6.4995428984071895	9.72862130463	-5.71717286741765	0.0	Two	Core
Chr1	542459	542651	LTR	0.533568205128205	0.5052083333333329	-0.6	5.03065184543009	7.91490336695068	9.440268192169599	9.276771947641109	-6.2757050781267205	0.0	Two	Core
Chr1	543616	543766	Unsp	0.281836486486487	0.166666666666667	1.21031746031746	5.03065184543009	10.1862737928155	9.28200807726223	6.67564550038155	-6.643856189774719	7.5	One	Core
Chr1	544152	544429	Unsp	0.18394449999999998	0.4079422382671479	0.398881640260951	5.03065184543009	10.0556959272376	9.12110472855005	7.81599863461041	-4.1763825360029605	13.5	One	Core
Chr1	544436	545987	LTR	0.12852846692112	0.182704811443433	1.08221436984688	5.03065184543009	8.831017521771999	8.56080750257445	5.22353818961055	-6.031172931495121	26.1875	One	Core
Chr1	545997	550063	LTR	0.10113095833333301	0.15494343334972902	1.10854608002897	5.09975004453444	8.88597039940576	8.28556837492848	6.38722250323352	-6.2812861103900195	34.404761904761905	One	Core
Chr1	550070	550459	LTR	0.10419317073170699	0.26546391752577303	1.4713804713804701	5.03065184543009	10.804368862660802	8.72488521275887	6.31777814780873	-6.643856189774719	10.4	One	Core
Chr1	550459	550600	LTR	0.108209578947368	0.25531914893617	1.15909090909091	5.03065184543009	11.0230339384058	9.689413040579211	6.8733316566237	-6.643856189774719	18.0	One	Core
Chr1	550543	551183	Unsp	0.144373755656109	0.2046875	1.13	5.03065184543009	9.576525512614749	8.177317350952361	5.53432746912722	-6.643856189774719	18.285714285714285	One	Core
Chr1	551183	558085	LTR	0.0774856443455391	0.16523867809057502	1.17262882905659	5.03065184543009	8.727058962374299	8.15817112450479	6.81924317054689	-5.0809922946163795	34.17142857142857	One	Core
Chr1	554671	556528	DNA	0.000538213132400431	0.510500807754443	-0.40021208907741296	5.03065184543009	8.130987424557361	8.14927211882399	8.492122327468849	-6.07571227900992	32.1	Two	Core
Chr1	558076	561558	Unsp	0.22100866061294	0.16886846639862102	1.1662417776099199	5.03065184543009	9.397779211131288	8.12987446904458	5.664334160667269	-5.40812082902072	34.22222222222222	One	Core
Chr1	562159	563040	Unsp	0.256874698133919	0.19977298524404102	1.1233515926151298	5.03065184543009	9.94710826408796	8.62494122102493	5.7120229762035795	-5.96686455056122	31.2	One	Core
Chr1	563014	570515	LTR	0.0871048076204707	0.22965335342878698	1.30088524166451	5.03065184543009	9.63898857065142	8.328272095831041	5.6379202961965005	-4.9320222364845705	21.18421052631579	One	Core
Chr1	567253	569379	Unsp	0.0783742467310972	0.24412041392286	1.3536016949152498	5.03065184543009	9.43775537237208	8.469061655487419	5.63123035198493	-4.79201588186862	23.545454545454547	One	Core
Chr1	570524	571384	Unsp	0.24092872832369897	0.148837209302326	1.03339755940912	5.03065184543009	9.22254910083883	8.10823891421077	4.74824882479015	-5.39905252101802	33.22222222222222	One	Core
Chr1	571384	572807	LTR	0.0890568701754386	0.195467422096317	1.1587044534413	5.03065184543009	9.289290753641199	8.640405234469691	4.9865965965084005	-5.077876792421139	25.5625	One	Core
Chr1	572805	573441	Unsp	0.12039185520361999	0.283018867924528	1.5	5.03065184543009	9.807475076961039	7.88740085463695	6.44724496951447	-5.6799601634599695	13.857142857142858	One	Core
Chr1	573555	574202	Unsp	0.13938368499257098	0.210200927357032	1.12535612535613	5.03065184543009	9.27404585970719	9.04489464460874	5.6482980724631	-4.8235156261226395	26.75	One	Core
Chr1	574282	581203	LTR	0.05410499999999999	0.19802793755135603	1.2799830888066202	5.03065184543009	9.136095768152051	8.33538242945917	6.926972418094831	-5.67322860117543	24.04225352112676	One	Core
Chr1	577829	579686	DNA	0.000538213132400431	0.510500807754443	-0.40021208907741296	5.03065184543009	8.37325862001526	8.27718415522048	8.45127654002759	-6.231844862570269	32.05263157894737	Two	Core
Chr1	580023	580790	Unsp	0.30871824607329806	0.21251629726206	1.2324929971988798	5.03065184543009	9.228374877507731	7.9639363639299905	5.179340621991829	-6.643856189774719	20.875	One	Core
Chr1	581203	581838	Unsp	0.12491453313253001	0.24881889763779502	1.2939209726443799	5.03065184543009	9.803513605789721	9.021232212454619	6.113537809250901	-5.10242658360828	20.428571428571427	One	Core
Chr1	581921	587922	LTR	0.0810963020572002	0.19936069986541	1.2148546571437	5.03065184543009	9.630902794343461	8.37738262925566	5.01303911189624	-5.28802000448889	28.327868852459016	One	Core
Chr1	587922	588789	Unsp	0.21499614537444897	0.171856978085352	1.1422619047618998	5.03065184543009	9.97660905618674	8.512698455813549	4.33986156466251	-4.7263183499667	25.88888888888889	One	Core
Chr1	588851	589440	Unsp	0.128329830795262	0.168081494057725	1.16666666666667	5.03065184543009	9.33230188879694	8.71218090773323	4.58202345655721	-5.21361628385221	35.42857142857143	One	Core
Chr1	589489	590789	Unsp	0.233715125628141	0.175384615384615	1.20975609756098	5.03065184543009	9.32630138445649	8.47068011773995	4.22669129250628	-5.846421981515809	34.0	One	Core
Chr1	590846	591567	Unsp	0.272316807065217	0.24826629680998602	1.2281445588532198	5.03065184543009	10.4320065749225	8.463293888149341	6.4429324867228495	-3.67344298576307	23.875	One	Core
Chr1	591671	592305	Unsp	0.11973743589743599	0.225552050473186	1.3350866336633702	5.03065184543009	10.041149287843501	8.52682988954185	6.035309844930719	-5.2724079590435595	25.25	One	Core
Chr1	592333	605805	LTR	0.0890713681102362	0.19400396432111	1.1702125798267902	5.03065184543009	9.33127380435393	8.41474002276503	5.962217368531211	-4.8150001985062	30.00735294117647	One	Core
Chr1	595036	595353	Unsp	0.10375238853503199	0.26182965299684496	0.780564263322884	5.03065184543009	10.300030008034	8.562380186277121	5.966885471752651	-5.53990522573582	26.75	One	Core
Chr1	595362	598550	Unsp	0.243992875816993	0.199498117942284	1.21644535240041	5.03065184543009	9.153559099437231	8.45314910274777	4.919707790627901	-5.9292584086369695	31.636363636363637	One	Core
Chr1	599150	602362	Unsp	0.19777242322894503	0.187110834371108	1.20604895052361	5.03065184543009	9.57852081589866	8.52612597926935	4.7192152121259	-4.92455490249075	32.75757575757576	One	Core
Chr1	602424	603714	Unsp	0.24235879049676	0.20232558139534898	1.16130705394191	5.03065184543009	9.56909076231695	8.50526284965202	8.36709019124595	-5.461776988047791	32.642857142857146	One	Core
Chr1	603753	604460	Unsp	0.26335446575342497	0.24752475247524802	1.2846687211094	5.03065184543009	9.65784937440181	8.60563689904835	6.02440612319481	-4.8235156261226395	22.125	One	Core
Chr1	605805	612633	LTR	0.0646550043693562	0.521675454012888	-0.3347726306842331	9.46661891757951	7.13977745181241	7.6745128904539595	9.147032504526631	-6.2598950146403896	16.753623188405797	Two	Core
Chr1	612637	616059	LTR	0.0823453457834841	0.189624853458382	1.24647556390977	5.03065184543009	9.36618019807267	8.628288023988599	5.10496865227064	-4.73469542054138	23.02857142857143	One	Core
Chr1	616755	617402	Unsp	0.12611991111111098	0.27357032457496105	1.28879310344828	5.03065184543009	9.927974424369369	8.55609836577044	6.841332163400401	-5.51879871049771	18.875	One	Core
Chr1	617439	622306	LTR	0.066072885335998	0.19269521410579302	1.23121630506246	5.03065184543009	9.62769623067649	8.36913051009935	5.42655298222722	-4.7409236077348895	27.74	One	Core
Chr1	618772	619416	Unsp	0.10217583333333301	0.30124223602484496	1.3019480519480502	5.03065184543009	9.8323233220163	8.66346709573741	6.42939110277033	-5.31485471261258	15.125	One	Core
Chr1	622051	622570	Unsp	0.282748754863813	0.18304431599229298	1.08097165991903	5.03065184543009	9.67925864333885	8.31221461176179	4.673565199525759	-5.363748270581991	31.166666666666668	One	Core
Chr1	622570	630080	LTR	0.0823274451972898	0.204463450487772	1.25872307024771	5.03065184543009	9.43988461329892	8.33775682479042	5.3317916676778	-5.25985772352657	26.986842105263158	One	Core
Chr1	627288	628944	Unsp	0.0746575633293124	0.202898550724638	1.2758926810021698	5.03065184543009	8.989256058207848	8.4556360220167	4.81254356171575	-4.8668323436867595	29.833333333333332	One	Core
Chr1	630087	630759	LTR	0.0944329896907217	0.141369047619048	1.07382920110193	5.03065184543009	8.39571481779398	8.17400870653191	2.9082144697696095	-5.421463768438281	33.75	One	Core
Chr1	630759	631393	Unsp	0.17826045454545497	0.159305993690852	1.19266055045872	5.03065184543009	9.28935538167859	8.190880985885299	3.2896340779845796	-5.56585367777345	37.0	One	Core
Chr1	631524	632156	Unsp	0.154730243161094	0.18987341772151897	1.0926605504587201	5.03065184543009	9.62594054241581	8.4771687200695	5.07509323720741	-4.696323609668861	34.42857142857143	One	Core
Chr1	632236	641655	LTR	0.0747301265060241	0.193174893357709	1.31563031563032	5.50388265414672	9.84815850284144	8.17407315611711	6.512135636356059	-3.77611534792136	18.073684210526316	One	Core
Chr1	633698	640273	LTR	0.332878255584258	0.24	1.3379505089118602	5.03065184543009	9.86367836878018	8.216213286996389	5.85788447762164	-4.78229898612721	13.970149253731343	One	Core
Chr1	641211	641476	LTR	0.14920597826087	0.437735849056604	1.08756756756757	5.03065184543009	9.75338293214574	7.77694883689867	8.38704215543329	-5.19013822233182	9.333333333333334	One	Core
Chr1	641697	642004	LTR	0.0842685161290323	0.205211726384365	1.4888888888888898	5.03065184543009	9.611005009576472	9.37191437437477	5.22185691324166	-3.9969659399103703	30.2	One	Core
Chr1	642050	644579	LTR	0.11218917647058801	0.22209026128266	1.31693724689102	5.03065184543009	9.7266175046789	8.32001542889119	5.261841461447251	-5.183914334159209	27.615384615384617	One	Core
Chr1	644580	651804	LTR	0.0976954640322805	0.23333799077825895	1.2860173316483101	5.03065184543009	9.90775740734926	8.24280164296424	5.64594221031204	-5.430076898742991	26.783783783783782	One	Core
Chr1	651804	653407	LTR	0.0832231382316314	0.20149719276356798	1.1784212423405	5.03065184543009	9.90696053852048	8.53567678301709	5.216211705219849	-5.4838603055761395	33.94117647058823	One	Core
Chr1	653407	662141	LTR	0.0861350313793564	0.208127914723518	1.22715157553867	5.03065184543009	9.7331429122279	8.4202779341284	6.0892666220122	-5.24836048102763	29.34090909090909	One	Core
Chr1	662148	662820	LTR	0.11091017673048599	0.132440476190476	0.955760816723384	5.03065184543009	9.46726867657014	7.806503333303651	3.8684206750989105	-6.643856189774719	38.375	One	Core
Chr1	662820	663454	Unsp	0.15518896656535003	0.17823343848580397	1.2264150943396201	5.03065184543009	8.50288303103886	7.72403020257517	4.5591032499634006	-5.62920941381032	38.714285714285715	One	Core
Chr1	663569	664217	Unsp	0.1461646884273	0.192901234567901	1.22321428571429	5.03065184543009	9.816903504000269	8.29535258584046	5.39585112190736	-5.39905252101802	37.5	One	Core
Chr1	664296	669385	LTR	0.0621466198877306	0.184221146085553	1.19205052693968	5.03065184543009	8.9155473912296	8.23458539793549	4.85049592051119	-4.93336280696971	29.115384615384617	One	Core
Chr1	669385	669708	Unsp	0.151192529761905	0.21052631578947398	1.12820512820513	5.03065184543009	10.7845981654435	8.73515031813488	5.33790611791046	-5.38751643651494	24.0	One	Core
Chr1	669708	677202	LTR	0.088005044200375	0.22906005925127898	1.27437094933873	5.03065184543009	9.65145059740658	8.55854866982304	5.5043225230144595	-5.08825696502563	21.61842105263158	One	Core
Chr1	677207	677525	Unsp	0.0942902994011976	0.26100628930817604	1.34027777777778	5.03065184543009	10.399495795199801	9.110025037304961	6.71322055471105	-4.91024960769843	24.25	One	Core
Chr1	677608	678914	LTR	0.12916448824867302	0.237366003062787	1.11897244546498	5.03065184543009	9.43132442242066	8.7782089104268	5.97836191384807	-5.293139671462741	18.357142857142858	One	Core
Chr1	678914	679123	LTR	0.123342663551402	0.301435406698565	1.53272727272727	5.03065184543009	10.2263747469734	8.60908081953733	6.8276651998655495	-4.7457358037939406	18.666666666666668	One	Core
Chr1	679124	680123	Unsp	0.22620682974559697	0.202202202202202	1.16655435759209	5.03065184543009	8.49473215328533	8.395681356313819	5.59479150022055	-4.07084649181533	23.181818181818183	One	Core
Chr1	681281	681489	Unsp	0.229542882882883	0.46153846153846206	0.964912280701754	5.03065184543009	8.93481041358322	8.898594248886349	9.02414025055498	-5.06368670024247	0.0	One	Core
Chr1	701259	701458	Unsp	0.16684300000000002	0.57286432160804	0.37878787878787895	5.100184687091179	7.75506853289286	8.123044466718019	9.73635926714403	-6.443994280460191	0.0	Two	Core
Chr1	704463	704633	Unsp	0.25298838709677396	0.570588235294118	-0.33333333333333304	5.15087785571597	7.00582346015747	8.322925889178059	9.70928293201901	-6.34900625150543	0.0	Two	Core
Chr1	730423	730630	Unsp	0.191268235294118	0.40096618357487895	0.0	5.37499794034605	8.94178260224642	8.468263868394741	8.9603304528437	-5.0902578599629	11.0	Two	Core
Chr1	730853	730965	Unsp	0.267400983606557	0.36607142857142894	0.9375	5.03065184543009	10.0902795515419	10.0777457742062	8.570010245411531	-6.643856189774719	16.5	One	Core
Chr1	731027	731499	Unsp	0.23825766179540697	0.345338983050847	1.5416666666666698	5.03065184543009	9.835834664128821	8.98878716456937	7.57449113372367	-3.74867109481848	16.4	One	Core
Chr1	731499	737840	LTR	0.0636727321797111	0.30420969023034194	1.6480614973262	5.03065184543009	9.29147845993417	8.62236988954511	7.196561978383911	-3.87717695649885	10.846153846153847	One	Core
Chr1	737992	738465	LTR	0.317485935613682	0.31712473572938693	1.5118397085610198	5.03065184543009	9.32407246907913	8.84448351827664	7.52609406376563	-3.4113565739475202	6.666666666666667	One	Core
Chr1	738465	742192	LTR	0.285556120410367	0.27019050174403003	1.35147190008921	5.03065184543009	8.71334800246619	8.47761376747162	6.5545607227520195	-4.19277903347915	6.815789473684211	One	Core
Chr1	742192	749021	LTR	0.0646667899796097	0.5215990628203251	-0.32832556618428604	9.20887236037098	7.0114321048751	7.64473648822408	9.14534130688412	-6.26896049402382	16.5	Two	Core
Chr1	749021	749764	LTR	0.23512947780678897	0.313593539703903	1.42555348994423	5.21966174099868	8.100329533304809	8.77306463870082	7.6007356879876395	-4.01067189430192	11.875	One	Core
Chr1	749929	754086	Unsp	0.0861334925943622	0.296127014674044	1.49242745385179	5.19782060273641	8.87471662090904	8.61015295891515	7.212074810179209	-3.70313738330539	11.952380952380953	One	Core
Chr1	815425	817287	DNA	0.0032113290460878898	0.5477980665950589	-0.6201485148514849	7.49334745126233	7.12984848634778	7.54923410671106	9.0197710222422	-6.25641481841732	28.894736842105264	Two	Core
Chr1	990878	991001	Unsp	0.164540303030303	0.5447154471544721	-0.5512820512820511	5.61031645922789	1.28458826425009	8.5581992354447	9.43197777848118	-5.83958066064909	0.0	Three	Core
Chr1	995320	995428	Unsp	0.220499576271186	0.537037037037037	-1.1309523809523798	5.03065184543009	1.39914436357115	8.65006420505431	9.54422280673455	-6.04661535927513	0.0	Three	Core
Chr1	1720663	1720924	DNA	0.109748091603053	0.31034482758620696	0.7937569676700109	5.17425132346575	7.416301655598309	6.35940010876527	9.15975574574904	-6.643856189774719	1.25	Two	Core
Chr1	1750365	1750493	Unsp	0.12072353846153801	0.4296875	1.6607142857142903	5.10471848180467	0.0	9.34417897161098	9.26841292514749	-5.517258619996509	1.0	Three	Core
Chr1	1750867	1751063	Unsp	0.35202	0.535714285714286	-1.0954545454545501	7.295926015034669	0.0	6.81691731782485	9.55866996940469	-6.643856189774719	2.0	Three	Core
Chr1	1751131	1751242	Unsp	0.36454000000000003	0.540540540540541	-0.7857142857142858	7.18412873403866	7.776187521995009	6.87798121067093	10.1334005731804	-6.643856189774719	2.0	Two	Core
Chr1	1751519	1751643	Unsp	0.0809256692913386	0.47580645161290297	1.125	5.2023543974499	0.0	8.40159918965507	10.2687886866274	-6.227612927750481	1.0	Three	Core
Chr1	1765097	1765276	Unsp	0.41739111111111105	0.45810055865921795	-0.5350877192982461	5.03065184543009	0.0	10.189714822185099	9.368608522322369	-6.3525901881654905	0.0	Three	Core
Chr1	1765611	1765863	LTR	0.32538610038609994	0.484126984126984	-0.42456140350877203	5.2720656893181905	8.162376762149691	9.690749326583699	9.31448029178673	-6.01489778522688	0.0	Two	Core
Chr1	1767588	1767760	Unsp	0.25172263157894703	0.511627906976744	0.5113636363636359	5.49894378860013	1.6084344955885401	8.84015848141941	9.52515036670481	-6.395357877098809	0.0	Three	Core
Chr1	1831768	1831913	Unsp	0.25472	0.579310344827586	-0.605769230769231	7.67687903160435	7.50043671199828	8.38435423929356	9.75906616046324	-5.87891502294733	0.0	Two	Core
Chr1	1832254	1832394	Unsp	0.292316115107914	0.6571428571428571	-1.08571428571429	7.6886894805982005	0.0	7.335899436101121	9.8772420229679	-6.3060283822096395	0.0	Three	Core
Chr1	1857720	1858571	LTR	0.46757443236715	0.5311398354876621	0.165007466401195	5.312094263902	4.74231753085795	8.37678456033785	9.00616960625273	-6.36112333565956	18.555555555555557	Two	Core
Chr1	1914650	1914780	Unsp	0.08531804511278199	0.523076923076923	0.0	5.10471848180467	1.89390260632761	8.30850960766093	9.645647309173349	-6.274758067392519	0.0	Three	Core
Chr1	1928298	1928555	DNA	0.132417423076923	0.33852140077821	0.389527458492976	5.2023543974499	0.0	6.393327192874089	9.08245141990023	-5.70468138247077	0.0	Three	Core
Chr1	2107069	2107238	Unsp	0.225730537634409	0.5325443786982249	0.185714285714286	5.932776971901309	6.966997374708151	8.83952290731118	9.81941353309805	-6.37391183895826	0.0	Two	Core
Chr1	2126458	2126733	LTR	0.307830549450549	0.49454545454545507	-0.423273657289002	5.27430674119526	6.608156215496429	9.98720982367286	9.1701740317643	-6.643856189774719	0.0	Two	Core
Chr1	2264163	2264290	Unsp	0.0860362595419847	0.5196850393700789	0.6190476190476191	5.4095034559369894	0.0	7.67681061655283	9.65721242941774	-6.643856189774719	0.0	Three	Core
Chr1	2426795	2426922	Unsp	0.10270137404580199	0.52755905511811	0.157894736842105	5.03065184543009	6.0820559207416105	7.25756171247985	9.22008811297773	-5.90172426943979	0.0	Two	Core
Chr1	2589207	2589437	Unsp	0.0755381974248927	0.565217391304348	0.8904761904761909	5.34801157379668	0.0	5.963233721724711	10.7102414765897	-6.34656738128991	10.0	Three	Core
Chr1	2608121	2608252	Unsp	0.0914422222222222	0.49618320610687	0.10526315789473699	5.651009317421139	0.0	6.733851103164201	9.63452071375865	-6.643856189774719	0.0	Three	Core
Chr1	2642274	2642500	DNA	0.130949367088608	0.451327433628319	-0.3571428571428571	5.85245943696249	7.6575280952692	6.49242024290854	9.7892215356902	-6.643856189774719	0.0	Two	Core
Chr1	2664310	2664637	DNA	0.18682697604790402	0.46177370030581	-0.0769230769230769	5.4020810062903895	6.7897149849296	7.16296653452813	9.78545793052389	-6.075815280897809	0.0	Two	Core
Chr1	2898889	2899138	DNA	0.126413928571429	0.28915662650602403	0.48148148148148207	5.03065184543009	0.0	8.14834060073589	8.65363855807289	-5.763886893481491	2.75	Three	Core
Chr1	2902100	2902253	LTR	0.120735568862275	0.5686274509803921	0.6	5.72707974714906	1.10613348460785	8.12732866328232	10.363152675710198	-6.643856189774719	10.0	Three	Core
Chr1	2919564	2919752	LTR	0.22387657608695702	0.537234042553192	1.2536231884058	5.03065184543009	9.36354337921261	8.46896983137883	9.74926541321109	-5.63902303603878	1.0	Two	Core
Chr1	2919808	2919967	LTR	0.14230803680981602	0.289308176100629	1.27894736842105	5.03065184543009	10.2231481109305	8.1186193778133	7.827143734765659	-6.643856189774719	3.5	One	Core
Chr1	2919969	2920166	LTR	0.131803015075377	0.274111675126904	1.46153846153846	5.03065184543009	9.77207470223376	8.77651924787935	6.81224940112525	-5.131957151243291	6.0	One	Core
Chr1	2920249	2920632	Unsp	0.1161509	0.31331592689295	1.6517857142857097	5.03065184543009	9.22220348547882	8.257356869635919	7.331050157956179	-5.5797258523550095	3.6	One	Core
Chr1	2920633	2923093	LTR	0.0856533975903614	0.232520325203252	1.2650389610389599	5.03065184543009	9.20448393600622	8.059845705634379	5.509398128467031	-5.007852561950731	19.12	One	Core
Chr1	2923093	2936287	LTR	0.0832782958199357	0.200681492109039	1.22943722943723	5.03065184543009	9.58634318396799	7.883868303945321	5.227425751124679	-5.750478609308519	23.548872180451127	One	Core
Chr1	2926720	2934291	LTR	0.0896077165883143	0.21076777762784998	1.2396812375483401	5.03065184543009	9.501094474594929	7.988587811465121	5.24661596895913	-5.720422133158539	24.07894736842105	One	Core
Chr1	2936322	2938241	LTR	0.0817076536611438	0.226881720430108	1.3043913538111498	5.03065184543009	10.0315927871405	7.43515289152124	6.03943900883012	-6.10785925024284	27.65	One	Core
Chr1	2938241	2943174	LTR	0.0828278031990281	0.235628681698152	1.30350753099775	5.100184687091179	10.116260203552601	7.667521796568611	5.90085020835876	-6.15060985814518	15.34	One	Core
Chr1	2943173	2943320	LTR	0.133159375	0.54421768707483	0.154761904761905	5.15087785571597	10.795287806364698	7.843524029188759	8.95358740214646	-6.643856189774719	25.0	One	Core
Chr1	2943439	2944188	LTR	0.19948978388998	0.477272727272727	0.589285714285714	5.29787602046592	10.999816471939	6.775283955559289	8.14889365125863	-5.777888540424599	28.0	One	Core
Chr1	2944193	2944317	LTR	0.0894885039370079	0.338709677419355	0.982954545454545	5.03065184543009	11.202760061800198	8.30062608952141	8.218603249054139	-5.339001608246299	14.333333333333334	One	Core
Chr1	2944317	2944785	Unsp	0.17569266528925598	0.232905982905983	1.07460317460317	5.03065184543009	10.189111324867099	7.761490324996519	5.55140935057418	-5.83495248062163	16.8	One	Core
Chr1	2944970	2954602	LTR	0.10178837974683501	0.18181818181818202	1.1934591914569	5.03065184543009	9.79625712343871	7.60538019491961	6.201156594425041	-6.14746786303897	23.744897959183675	One	Core
Chr1	2946743	2947439	Unsp	0.130268213296399	0.24856321839080497	1.3436507936507902	5.03065184543009	10.459382642392802	7.868007708259139	6.41825698569394	-5.9826581032264805	25.5	One	Core
Chr1	2947383	2952583	LTR	0.0641537656157049	0.221233689205219	1.22379532316126	5.03065184543009	9.77521725419275	7.69216214788662	6.71295561469068	-5.901464009260841	16.71698113207547	One	Core
Chr1	2951404	2952170	Unsp	0.28675727027027004	0.254569190600522	1.3915770609318998	5.03065184543009	9.97635492993784	7.30907330523911	6.01833399382043	-6.13418181635781	16.0	One	Core
Chr1	2952583	2953220	Unsp	0.147405602409639	0.22291993720565098	1.1205154998258402	5.03065184543009	10.1250345743294	7.69240347774143	5.72244716681438	-6.643856189774719	34.625	One	Core
Chr1	2954602	2956861	LTR	0.0918904401408451	0.17042939353696301	1.13987363987364	5.03065184543009	9.96984155528242	7.0951431848154405	4.55460955927429	-6.18491586861907	33.608695652173914	One	Core
Chr1	2956861	2974263	LTR	0.0998024556755655	0.22718903436988502	1.2655319148936202	5.03065184543009	10.0905942814277	7.6817106824723105	5.706222840923849	-5.68395283499478	25.50857142857143	One	Core
Chr1	2959625	2967196	LTR	0.0987054302590952	0.21959778647590802	1.25673440262078	5.03065184543009	10.028487150468802	7.5487721829080305	5.5379067933676795	-5.55448038244403	25.276315789473685	One	Core
Chr1	2974263	2974931	LTR	0.0846510935023772	0.13897763578274802	1.17391304347826	5.03065184543009	9.94320680204032	7.44371554162276	4.76466616453657	-3.3088719420619204	27.375	One	Core
Chr1	2974931	2975113	LTR	0.139478125	0.40659340659340704	2.03921568627451	5.03065184543009	11.1819115164344	8.04497420489801	7.54996868247745	-6.643856189774719	25.333333333333332	One	Core
Chr1	2975123	2982694	LTR	0.0956186896459228	0.210888020482415	1.25350832046663	5.03065184543009	9.88881182484297	7.31112850545061	5.40675093220983	-5.86838942622561	25.57894736842105	One	Core
Chr1	2982697	2991839	LTR	0.0974238083228247	0.22724379376193501	1.2678046672428702	5.03065184543009	9.752810130315678	7.370024329882869	5.05016385649597	-5.62547766045987	27.78494623655914	One	Core
Chr1	2984150	2991721	LTR	0.0949383607885498	0.191947946319642	1.1609418784674899	5.03065184543009	9.58034739202049	7.31155021799191	4.7664173577693	-5.80522176615046	29.025974025974026	One	Core
Chr1	2991839	2997565	LTR	0.0795343185840708	0.20398363862706698	1.22901829628172	5.03065184543009	9.909285441166368	7.405264533384059	5.384278902260691	-6.07975229395123	20.913793103448278	One	Core
Chr1	2997565	3007461	LTR	0.0980189501259446	0.258185125303153	1.3057034929435902	5.03065184543009	10.3157528683869	7.827139170264231	6.526966984556121	-5.772110680447169	23.43	One	Core
Chr1	3007461	3009089	LTR	0.0912694716242661	0.242603550295858	1.31785714285714	5.03065184543009	10.2057077062289	8.173583301443701	6.44084078727515	-6.17743330422897	23.41176470588235	One	Core
Chr1	3009077	3012797	LTR	0.0817811494565217	0.214246873300707	1.2120686134368002	5.03065184543009	9.87380405818863	7.926341228196809	5.62802519264626	-6.08800543729487	22.63157894736842	One	Core
Chr1	3012797	3020367	LTR	0.0917548344725908	0.22294022617124398	1.27498891873561	5.03065184543009	9.90897453040249	7.359228445137201	5.60179390279014	-5.67098276451024	22.61038961038961	One	Core
Chr1	3020370	3024823	LTR	0.09291440625	0.267011003817651	1.3505008144733701	5.03065184543009	10.5212470100106	7.9691227134089	6.658674244406941	-5.503986729749651	18.847826086956523	One	Core
Chr1	3024854	3025188	LTR	0.0947982647058823	0.344311377245509	1.67	5.03065184543009	11.3704281816169	7.54906810333542	7.73584337878084	-5.991779493195031	23.25	One	Core
Chr1	3025188	3026424	LTR	0.103969216	0.199838187702265	1.18257425742574	5.03065184543009	9.94522330803755	7.39028496306518	5.47209837306663	-5.830269314005611	28.142857142857142	One	Core
Chr1	3026424	3039826	LTR	0.0960790370578327	0.208015805814282	1.2268733850129199	5.03065184543009	10.280379773278	7.6709609409815505	6.504211003886019	-6.04070474274005	22.748148148148147	One	Core
Chr1	3027193	3036924	LTR	0.0894609712933429	0.270203323356384	1.32716013127457	5.03065184543009	10.3806639765502	7.75096234680122	6.73459845047321	-5.71778842781666	20.858585858585858	One	Core
Chr1	3039887	3047449	LTR	0.0936876781857451	0.213917525773196	1.2033470423002601	5.03065184543009	9.77923472528844	7.68511774251798	5.28565704307371	-5.79393119066298	25.662337662337663	One	Core
Chr1	3047455	3047791	LTR	0.0762569411764706	0.30952380952381	1.5570321151716497	5.03065184543009	10.518641358017499	7.99371534052884	6.8422779551304505	-5.493613554194111	17.5	One	Core
Chr1	3047946	3048978	LTR	0.0465654826254826	0.21124031007751898	1.09193374497697	5.03065184543009	10.0513183470039	7.57519238537032	5.798774683353961	-4.8235156261226395	24.90909090909091	One	Core
Chr1	3048978	3049084	LTR	0.0676457943925234	0.30188679245283	1.33333333333333	5.03065184543009	11.9423879411661	8.00596367542942	6.83801534895985	-5.7693870718585805	30.0	One	Core
Chr1	3049096	3056665	LTR	0.13563718582169698	0.288316243928764	1.40568227290916	5.03065184543009	10.286723445812301	7.606312168075879	6.75338105993991	-5.78092274256545	20.31168831168831	One	Core
Chr1	3056665	3057803	LTR	0.143089409594096	0.17007434944237898	1.1632745364088601	5.03065184543009	9.522428594968849	7.1334770257531	5.63005834185426	-5.74694968273883	30.846153846153847	One	Core
Chr1	3057803	3062860	LTR	0.0892597322677323	0.20479041916167698	1.23636493432324	5.03065184543009	9.5270845093936	7.610483153710329	5.316864409909599	-5.95076842422243	25.274509803921568	One	Core
Chr1	3062869	3072648	LTR	0.0996786684312328	0.262194498414971	1.31006747093227	5.03065184543009	10.3193271238878	7.762164620799309	6.4718773039918105	-5.46000395868103	24.2020202020202	One	Core
Chr1	3072637	3079341	LTR	0.0943214796698257	0.207060629316961	1.24671324075768	5.03065184543009	9.92006861201281	7.851720574717739	5.08924921230261	-6.0879279891758795	26.397058823529413	One	Core
Chr1	3079355	3090778	LTR	0.0911220904586863	0.18429487179487197	1.2137541879738998	5.03065184543009	9.63942626004554	7.91043868998232	5.96597711482998	-6.1069512292129895	23.582608695652173	One	Core
Chr1	3081430	3086320	LTR	0.0845495075913008	0.25424079437318997	1.35483554955169	5.03065184543009	9.86962838665498	7.9683663752856795	6.7120086783419	-5.51705741206934	18.78	One	Core
Chr1	3086419	3086572	LTR	0.194010658682635	0.457516339869281	2.25	5.03065184543009	11.1843218698027	7.99629145109767	8.25985602594918	-6.643856189774719	13.5	One	Core
Chr1	3090778	3092474	LTR	0.11498637507489501	0.1985515992758	1.20376175548589	5.03065184543009	9.09535782055903	8.00196832972474	5.01698328397791	-4.65363721056731	27.38888888888889	One	Core
Chr1	3092457	3092913	Unsp	0.16936268343815497	0.368421052631579	0.704357418643133	5.19799905294362	9.97280737504242	7.7031931404947604	7.59834823544546	-4.93660875857274	13.5	One	Core
Chr1	3092910	3093054	LTR	0.135743184713376	0.548611111111111	-0.32967032967033	6.80003257502158	9.8606541256745	7.33968394675789	8.98348083080518	-6.643856189774719	13.0	Two	Core
Chr1	3093055	3093252	Unsp	0.176645194174757	0.416243654822335	0.7275541795665641	5.03065184543009	9.400677871819141	7.2528578966036905	8.110686285245219	-6.03899413161586	6.0	One	Core
Chr1	3093335	3093503	Unsp	0.186940173410405	0.273809523809524	1.47619047619048	5.03065184543009	8.73438399949481	8.65073507516085	6.51281359170403	-6.643856189774719	9.333333333333334	One	Core
Chr1	3093469	3093583	LTR	0.163462203389831	0.228070175438596	1.52941176470588	5.03065184543009	9.12717529005096	9.04489464460874	5.83797007177675	-6.643856189774719	10.0	One	Core
Chr1	3093583	3093889	LTR	0.18824347133757996	0.19281045751634	1.4347826086956499	5.03065184543009	7.633800439042551	7.87602294894506	5.36956035095288	-4.75527747244315	15.0	One	Core
Chr1	3094078	3094336	LTR	0.21548555555555604	0.37209302325581395	0.1875	5.03065184543009	9.266622120637749	8.427314060964308	7.08072074508281	-5.03939751342777	2.5	One	Core
Chr1	3135455	3135688	Unsp	0.25901510373444	0.424892703862661	-0.208333333333333	6.40960274333291	6.84593868495131	7.4653846855315305	9.25282368556974	-5.844154840260559	0.0	Two	Core
Chr1	3314870	3315187	DNA	0.126798611111111	0.454258675078864	0.42857142857142894	5.50447310204265	0.0	6.82441513370849	9.294119667591561	-6.46260246323176	0.0	Three	Core
Chr1	3362930	3363184	DNA	0.18359362595419798	0.47244094488189003	-0.12222222222222198	5.2433495225700995	0.7591719088386941	7.537274529161331	9.35235948848091	-5.96686455056122	0.0	Three	Core
Chr1	3370436	3370753	LTR	0.519299191919192	0.570977917981073	-0.665546218487395	5.10471848180467	5.232427594403839	6.4461828992746	9.599910770700788	-6.29996062963822	0.0	Two	Core
Chr1	3566797	3568362	Unsp	0.283911586570112	0.5980830670926519	-1.1199212457490602	7.43360422712951	6.36335034217928	5.63048142586604	9.22131544750685	-6.23861288189474	0.0	Two	Core
Chr1	3568474	3568841	Unsp	0.30804702970297	0.656675749318801	-1.210407239819	6.040873212816201	0.0	6.20905999702878	9.507006113298349	-6.52320966186402	0.0	Three	Core
Chr1	3568899	3569052	Unsp	0.321305454545455	0.647058823529412	-1.27083333333333	5.6695876275324	0.0	4.72433801288795	9.57649234943051	-6.22680515905823	0.0	Three	Core
Chr1	3714645	3714853	Unsp	0.203157743362832	0.509615384615385	0.866666666666667	5.435235858867119	0.8847244570790121	9.74124577165048	9.46090243880129	-6.643856189774719	0.0	Three	Core
Chr1	3728450	3728926	LTR	0.051792828685259	0.51890756302521	-0.37866224433388596	5.03065184543009	7.6662869464122405	8.29453046607777	9.47934533081185	-6.3836757809960805	13.166666666666666	Two	LS
Chr1	3728926	3734909	LTR	0.0793429033333333	0.521644659869631	-0.38053085199824294	5.03065184543009	6.68587407063663	7.682902789885611	9.040865059241579	-6.24420123119359	19.131147540983605	Two	Core
Chr1	3734909	3735385	LTR	0.051792828685259	0.51890756302521	-0.37866224433388596	5.03065184543009	8.72567892320928	7.98895697338032	9.434750461345061	-6.302657207792	14.6	Two	Core
Chr1	3735653	3736778	LTR	0.100958115183246	0.21866666666666698	1.29659090909091	5.03065184543009	8.61047774721997	9.24698909630178	5.74460839400739	-5.03278084873444	20.333333333333332	One	Core
Chr1	3736725	3737379	Unsp	0.0937015703703704	0.29969418960244604	1.34883720930233	5.03065184543009	8.92672127269978	9.01818714317434	6.90121623790013	-5.25640452216778	5.857142857142857	One	Core
Chr1	3737416	3742495	LTR	0.0559797158514309	0.207805476093175	1.31560134566863	5.03065184543009	8.61974473512271	8.70304830648829	4.99435481895692	-3.9969659399103703	16.823529411764707	One	Core
Chr1	3741307	3742082	Unsp	0.289506432432432	0.22451612903225798	1.3775510204081598	5.03065184543009	8.4928258492381	8.67110160323695	4.94220294967278	-3.59219406995223	16.5	One	Core
Chr1	3742495	3743130	Unsp	0.0943324508320726	0.277165354330709	1.31842576028623	5.03065184543009	9.23443978172354	9.31289099988604	6.5493057835355195	-6.2589107556523205	12.0	One	Core
Chr1	3744300	3751806	LTR	0.0838789871403951	0.189859906604403	1.1700116486593402	5.03065184543009	8.98161741639041	8.42696350919235	4.64143023754582	-4.664324625799559	30.776315789473685	One	Core
Chr1	3745447	3747081	Unsp	0.0912684178375076	0.192778457772338	1.16039988891974	5.03065184543009	8.93294657453752	8.49482149233854	4.46899909581223	-4.74956563094584	32.705882352941174	One	Core
Chr1	3752335	3752969	Unsp	0.11873009009009	0.294952681388013	1.37979094076655	5.03065184543009	9.915294942507089	8.756247513829111	6.15439553270576	-4.30901798599997	26.714285714285715	One	Core
Chr1	3754293	3766068	LTR	0.0798409105824446	0.19814049586776897	1.17866313905533	5.03065184543009	7.7230223886750995	8.04868103653128	8.41483140873629	-4.0858607366538395	21.445378151260503	One	Core
Chr1	3755121	3761516	LTR	0.0643998444548141	0.520562939796716	-0.340270748987854	5.03065184543009	6.977988855041031	7.691861461635559	9.11288535241453	-6.2041038241433295	17.692307692307693	Two	Core
Chr1	3761516	3761972	LTR	0.144117796610169	0.506578947368421	-0.177142857142857	5.03065184543009	7.977659116905769	7.96641057889333	9.63768401240206	-5.90172426943979	30.0	Two	Core
Chr1	3766069	3766520	LTR	0.148268902953586	0.509977827050998	-0.218823529411765	5.03065184543009	7.84509796759781	8.07295084430297	9.42094237349301	-6.2754687837947	29.333333333333332	Two	Core
Chr1	3766520	3772481	LTR	0.0693365886287625	0.5205502432477771	-0.371458106436786	5.3024636334589905	6.78911281990752	7.626244139351701	9.00094140191817	-6.3297399703384505	22.35	Two	Core
Chr1	3772480	3779348	LTR	0.0789351724137931	0.518281136198106	-0.35457626446805107	5.4144423273332905	6.3590416208325395	7.241183342737321	8.65134483188482	-6.27735931066185	27.37142857142857	Two	Core
Chr1	3779348	3785778	LTR	0.0755546282527881	0.518662519440124	-0.345946568401658	5.3024636334589905	6.80700426459216	7.55743960329453	8.93054655423029	-6.343349118177481	23.630769230769232	Two	Core
Chr1	3785778	3785910	LTR	0.0840177777777778	0.37878787878787895	1.2428571428571398	5.1352948761526696	7.9721471524947205	8.985045773685211	8.91515599256128	-5.96032985456998	25.666666666666668	Two	Core
Chr1	3786672	3786879	Unsp	0.21772648648648601	0.492753623188406	1.9429824561403501	5.10471848180467	7.29916968402275	8.468263868394741	9.25235224488907	-5.05889368905357	5.0	One	Core
Chr1	4189651	4189887	Unsp	0.308333021276596	0.419491525423729	-0.0909090909090908	5.640052310758341	8.31564672739678	8.17812779146461	9.30150752732779	-6.103287808412019	0.0	Two	Core
Chr1	4250407	4250963	Unsp	0.1458473183391	0.33812949640287804	0.7566718995290419	5.128900853839269	6.9592405420380405	8.31979093998055	8.11030534579085	-4.72958606380061	11.833333333333334	One	Core
Chr1	4250963	4251439	LTR	0.051792828685259	0.51890756302521	-0.37866224433388596	5.03065184543009	7.92025011018461	7.83150531604383	9.509430537763789	-6.321205120659809	13.666666666666666	Two	Core
Chr1	4251439	4257422	LTR	0.07897574	0.521310379408324	-0.38430216103203707	6.74496777093104	6.6862844351956	7.72717789889221	9.12710787281871	-6.30575222027055	18.75409836065574	Two	Core
Chr1	4257422	4257898	LTR	0.051792828685259	0.51890756302521	-0.37866224433388596	5.03065184543009	8.09390223303355	7.78144007516086	9.33933943811453	-6.1187114633550195	15.4	Two	Core
Chr1	4257898	4258863	Unsp	0.11696100103199199	0.27046632124352304	1.47517039922103	5.03065184543009	7.768249416156809	8.265823085531268	6.75559685972574	-3.73191236643992	12.909090909090908	One	Core
Chr1	4258065	4260672	Unsp	0.0689098695318496	0.27924817798235496	1.50038505968425	5.03065184543009	8.41075329761173	8.45299284091849	6.846496248510059	-4.09746465391653	12.88888888888889	One	Core
Chr1	4258866	4261472	Unsp	0.0854397092578424	0.296623177283193	1.5966186765288601	5.03065184543009	8.89229809305393	8.72226731473957	7.206827724379551	-4.01255552670167	12.925925925925926	One	Core
Chr1	4261616	4261790	Unsp	0.25414000000000003	0.293103448275862	1.69940476190476	5.03065184543009	9.76310326528646	9.41270547947034	7.84820686740056	-1.6614446051003602	20.5	One	Core
Chr1	4261790	4265812	LTR	0.17834543689320398	0.379164594728991	1.49436205417331	5.03065184543009	8.42830332652194	8.1458339535288	7.76339484373991	-3.8503712981229197	2.5714285714285716	One	Core
Chr1	4265812	4272641	LTR	0.0645078852315759	0.521745497144531	-0.3347726306842331	9.46661891757951	7.05995935374519	7.66225553257502	9.10234978670314	-6.216496878967741	16.52173913043478	Two	Core
Chr1	4272641	4274462	LTR	0.205859319429199	0.332784184514003	1.64511250347233	5.03065184543009	7.600037782586861	8.136437255060951	7.42244118694322	-4.07701065012285	5.894736842105263	One	Core
Chr1	4274474	4275033	LTR	0.20179962765957396	0.384615384615385	1.5259784075573601	5.03065184543009	7.44041523067448	8.277313558817331	7.48818457696368	-3.6654511504459797	17.285714285714285	One	Core
Chr1	4275033	4275501	LTR	0.214071680497925	0.35897435897435903	0.893847194050034	5.03065184543009	9.32513839764772	8.27055585251003	7.8162351978054705	-4.14176195622666	12.5	One	Core
Chr1	4275516	4281854	LTR	0.065717024452207	0.30435473617291803	1.63187884769021	5.03065184543009	8.84987255579789	8.62629434739089	7.1805182002077	-3.6141529891188697	10.9375	One	Core
Chr1	4281854	4282287	Unsp	0.267878752783964	0.3672055427251729	1.5889534883720902	5.03065184543009	9.064862394809882	9.14469263224634	7.73011790318346	-4.2879961182162	13.2	One	Core
Chr1	4282349	4282461	Unsp	0.259628512396694	0.34821428571428603	1.3125	5.03065184543009	9.530819359119212	10.1070344879814	8.30229768766414	-4.84504300398292	15.0	One	Core
Chr1	4282681	4282880	Unsp	0.21975046728972	0.407035175879397	0.350383631713555	5.03065184543009	0.914476664259385	8.02322229174186	8.994863151279429	-5.963613185620461	11.0	Three	Core
Chr1	4416590	4416785	Unsp	0.219433571428571	0.3487179487179489	-0.0838509316770186	5.2739259169181105	9.136342712541381	8.11044247542497	8.71570734922819	-6.643856189774719	12.666666666666666	Two	Core
Chr1	4417008	4417120	Unsp	0.220065511811024	0.25	1.3	5.03065184543009	0.0	9.238819306923268	6.498193402485209	-2.60958628768998	18.5	Three	Core
Chr1	4417182	4417603	Unsp	0.27456986078886303	0.25415676959620004	1.390625	5.03065184543009	7.27937158445878	9.0334208570388	5.77788561697281	-3.74630345874554	18.166666666666668	One	Core
Chr1	4417603	4419646	LTR	0.0941567626953125	0.269701419481155	1.53237604320079	5.03065184543009	8.67923858117808	8.88995348053685	6.6031388344326505	-4.25567418232259	16.904761904761905	One	Core
Chr1	4419646	4420122	LTR	0.222516966067864	0.3529411764705879	1.1441782261454398	5.03065184543009	9.16077937596975	8.412006530354821	7.47696218809984	-4.64328651749057	2.3333333333333335	One	Core
Chr1	4420122	4423425	LTR	0.248080616873299	0.303360581289737	1.42009389671361	5.03065184543009	9.252242944867259	8.48334731431507	6.996581504437191	-4.42659618590313	5.382352941176471	One	Core
Chr1	4423425	4423901	LTR	0.222516966067864	0.348739495798319	1.5204678362573099	5.03065184543009	10.2098122659251	9.018379449741868	7.25817061286178	-4.680918283996269	0.5	One	Core
Chr1	4423901	4429884	LTR	0.24283071094793104	0.32308206585325105	1.54870792591607	5.03065184543009	9.45160037352732	8.48431966903128	7.10662714923367	-4.51746013075214	1.85	One	Core
Chr1	4429884	4430360	LTR	0.225057884231537	0.34453781512605	1.27261998426436	5.10471848180467	9.961326713273289	8.34792626643191	7.33484754275069	-4.62967457423379	2.1666666666666665	One	Core
Chr1	4430360	4434836	LTR	0.251938680974737	0.306076854334227	1.43920618180343	5.03065184543009	9.432916858357551	8.39249401937812	6.82839619228636	-4.35391477704862	5.021739130434782	One	Core
Chr1	4434836	4435312	LTR	0.21698948207171304	0.36764705882352894	1.3668831168831201	5.03065184543009	9.63842559142762	8.026286060428639	7.34229577566375	-5.239993766052559	1.0	One	Core
Chr1	4435312	4435677	Unsp	0.07989168937329699	0.287671232876712	1.46	5.03065184543009	10.9076867912578	8.61486623020304	6.8241985832962	-3.77021739996259	9.75	One	Core
Chr1	4435581	4437265	Unsp	0.0908487603305785	0.25	1.42857142857143	5.03065184543009	9.91967362691197	8.43324577267028	6.2070103628840805	-4.341512491205759	11.88888888888889	One	Core
Chr1	4437389	4437516	Unsp	0.267293103448276	0.26771653543307106	1.625	5.03065184543009	10.9265605812937	9.75771009305141	6.915354006124951	-4.45121111183233	6.666666666666667	One	Core
Chr1	4437516	4448657	LTR	0.0856482054309327	0.280668707322816	1.51415428167021	5.03065184543009	9.6618143628028	8.42454515021626	6.53357547251219	-4.58800295504121	8.75	One	Core
Chr1	4439168	4445993	LTR	0.290801644015783	0.271794871794872	1.3098752016859299	5.03065184543009	9.62091388982431	8.41295754613793	6.2507639597178795	-4.25112157259467	7.3768115942028984	One	Core
Chr1	4448657	4451819	LTR	0.22555963054187197	0.29127134724857695	1.52181020733652	5.03065184543009	9.181284122951961	8.453310727558451	6.65931930813411	-4.43642765962326	8.363636363636363	One	Core
Chr1	4451867	4457851	LTR	0.22725186236846498	0.33673128342246006	1.5407138473538997	5.03065184543009	9.45081632860275	8.38324158037129	7.1801773835875	-4.44893205186125	3.377049180327869	One	Core
Chr1	4457851	4458327	LTR	0.226601593625498	0.34033613445378197	1.4055555555555599	5.03065184543009	9.50270445013879	8.577624172479	7.69626100048545	-3.8757849953676597	3.3333333333333335	One	Core
Chr1	4458327	4460315	LTR	0.203632242242242	0.34808853118712296	1.63998398037596	5.03065184543009	9.181585081651448	8.48463761105511	7.223234459528309	-4.30897537218282	7.428571428571429	One	Core
Chr1	4460316	4461789	Unsp	0.0866253731343284	0.224032586558045	1.3756025213199898	5.03065184543009	8.86724613987729	8.71842500675381	5.927459835444701	-4.35594212715242	17.4	One	Core
Chr1	4461626	4462505	Unsp	0.167512430939227	0.249146757679181	0.943417366946779	5.1352948761526696	8.5328314160945	8.412133237095869	7.0553398059019194	-5.157501285994231	9.3	One	Core
Chr1	4734942	4735211	LTR	0.284537101449275	0.449814126394052	-0.557029177718833	5.2433495225700995	7.35566700277346	7.41083912574121	8.940242633087651	-5.687473204325331	0.0	Two	Core
Chr1	4811325	4812003	DNA	0.122659507154213	0.4654895666131621	0.72962962962963	5.22822020606754	6.85682369326831	7.98322631530411	9.22504361588936	-3.5192993777034904	0.375	One	Core
Chr1	4879515	4887037	LTR	0.0830956532097948	0.215949940087871	1.15526286164584	5.03065184543009	7.92879512330655	8.44349460817535	6.132065089586719	-4.26204747150081	16.44736842105263	One	Core
Chr1	5376178	5377075	LTR	0.4229698666666671	0.53288740245262	-1.08661257606491	8.72290757184515	4.74479539157505	6.460732249875491	9.17436245631276	-6.28856591694621	0.0	Two	Core
Chr1	5525105	5525518	Unsp	0.374676496350365	0.5665859564164649	-1.05832449628844	5.16928288619553	4.60817764076057	7.112080923109291	8.963118065561279	-6.25518470030077	0.0	Two	Core
Chr1	5532098	5533397	LINE	0.0285921729323308	0.5519630484988449	-0.450298685782557	10.2090765579552	5.509196116018799	7.415918056161949	9.44118327169161	-6.41339471772928	17.785714285714285	Two	Core
Chr1	5558982	5559179	Unsp	0.208363762376238	0.45685279187817296	0.262857142857143	5.88372130261143	0.9213713159441009	6.45889541108889	9.11335898066252	-6.643856189774719	0.0	Three	Core
Chr1	5593493	5600321	LTR	0.31219827747695	0.260181658365075	1.3271953010278998	5.03065184543009	8.63278533987612	8.17495614743464	6.07831102717857	-4.09742873898592	11.771428571428572	One	Core
Chr1	5600651	5607526	LTR	0.320032540983607	0.259071980963712	1.2972891620392801	5.03065184543009	8.28944755343194	8.194598183641	5.90996583859439	-3.9797756953682404	10.471428571428572	One	Core
Chr1	5600925	5601105	LTR	0.237178125	0.28333333333333305	1.42265795206972	5.03065184543009	9.49662238420768	9.24255256786107	7.32782186714785	-3.9563079191427004	18.666666666666668	One	Core
Chr1	6065336	6065460	Unsp	0.08704921875	0.4919354838709679	0.729166666666667	5.76249563406834	7.16435322716365	6.14985601155903	10.498542493463	-6.643856189774719	0.0	Two	Core
Chr1	6083522	6083737	DNA	0.0759339449541284	0.288372093023256	0.661490683229814	5.7304576848602	6.442382634085599	7.58126518978142	8.39537441747848	-6.04155637262056	1.0	Two	Core
Chr1	6162070	6162750	DNA	0.246912869127517	0.522033898305085	-0.296583850931677	6.0931359235691	5.78627788422104	7.400568891702191	10.0349722993058	-6.4734287697165405	0.0	Two	Core
Chr1	6311890	6312149	DNA	0.101458544061303	0.301158301158301	0.497219132369299	5.31698141925331	6.50209074995229	7.3314731242694196	8.69106129437303	-6.21643496604005	0.5	Two	Core
Chr1	6312152	6312407	DNA	0.18743962264150899	0.458823529411765	-0.31034482758620696	5.03065184543009	6.5351570014952305	8.31226310800992	9.76720986094176	-5.985727276491599	0.0	Two	Core
Chr1	6348727	6348879	Unsp	0.24532791907514498	0.513157894736842	-0.130769230769231	5.03065184543009	5.49479626997474	9.27910909845265	8.92864489142956	-6.290219235160019	0.0	Two	Core
Chr1	6503785	6503922	DNA	0.300073214285714	0.262773722627737	1.02941176470588	5.03065184543009	0.0	8.429209133130259	7.79965879377794	-4.93336280696971	3.6666666666666665	Three	Core
Chr1	6504134	6504351	DNA	0.244336055045872	0.24423963133640603	1.25760649087221	5.03065184543009	0.8569018729579009	7.67517082144394	7.6399556914089795	-5.31321087778625	3.6666666666666665	Three	Core
Chr1	6923907	6924450	Unsp	0.306358903107861	0.513812154696133	-0.982142857142857	5.725755274010051	0.719421171779058	7.84689561722553	9.1677758937706	-6.328118031006559	23.666666666666668	Three	Core
Chr1	6924543	6924682	Unsp	0.3579229166666671	0.60431654676259	-1.04444444444444	5.2541672565896205	0.0	8.60975924167859	9.89202142821505	-6.108362365317871	14.5	Three	Core
Chr1	7044817	7044967	Unsp	0.390191346153846	0.5266666666666671	0.0840336134453781	5.173816680909019	1.1216041168304298	8.2315222747798	9.82451889674078	-5.859024284343259	0.0	Three	Core
Chr1	7061167	7061368	Unsp	0.22422624434389105	0.54228855721393	0.6342592592592591	5.03065184543009	1.4605185878053102	9.67464309614782	9.80103806333674	-6.45450291414359	0.0	Three	Core
Chr1	7061370	7061501	Unsp	0.277259448275862	0.5038167938931299	-0.7	5.03065184543009	8.02107803385524	9.470288668004141	9.8598176818859	-6.643856189774719	0.0	Two	Core
Chr1	7094683	7099415	LTR	0.080830379614094	0.20942519019442105	1.22934085571021	5.03065184543009	9.083504183497311	8.80204851249872	5.670135886106861	-5.4514429259311505	22.346938775510203	One	Core
Chr1	7099415	7099782	LTR	0.254282281167109	0.258855585831063	1.23839009287926	5.03065184543009	9.114749358087119	9.21305792062929	6.89734231978909	-5.59853219926524	23.5	One	Core
Chr1	7099746	7100488	Unsp	0.278814347826087	0.276280323450135	1.31275925004148	5.03065184543009	9.33228028934029	8.798247916774141	6.81956343215166	-4.36211018860849	19.5	One	Core
Chr1	7100543	7101845	Unsp	0.268069631236443	0.235023041474654	1.36302218218669	5.03065184543009	9.050184047682151	8.7558309713848	5.90405199192062	-5.60860161335325	28.642857142857142	One	Core
Chr1	7101895	7102484	Unsp	0.10858686971235199	0.213921901528014	1.3505154639175299	5.03065184543009	8.65130182950881	8.585466929527481	5.57220296532638	-5.86193045451748	26.571428571428573	One	Core
Chr1	7102546	7105109	Unsp	0.243358207440812	0.21030042918454897	1.1859683794466398	5.03065184543009	9.186437900486421	8.60875669548685	5.4617048481397905	-4.94400376862562	30.11111111111111	One	Core
Chr1	7105712	7106896	Unsp	0.235700953947368	0.21452702702702697	1.16452221650369	5.03065184543009	9.46347533414377	8.07688756533577	4.781678129507299	-5.527947221628571	30.0	One	Core
Chr1	7106895	7108902	Unsp	0.23275377898372002	0.216741405082212	1.25356502766306	5.03065184543009	9.454796373754562	8.72562099141973	8.18032104947458	-4.67666805984965	29.363636363636363	One	Core
Chr1	7108876	7109228	Unsp	0.137436103151862	0.22159090909090898	0.7912932138284251	5.03065184543009	9.626040203920368	8.78976923477086	6.1053758403533305	-4.07873850045044	29.2	One	Core
Chr1	7109300	7115709	LTR	0.3761454098360661	0.204244031830239	1.25473601508485	5.03065184543009	9.43340141247861	8.34662858435373	5.34271498097488	-4.8944486169264	18.6	One	Core
Chr1	7115709	7118481	LTR	0.0856048775216138	0.212889210716872	1.19237979429498	5.03065184543009	9.37521635458788	8.56010987866975	5.71213944883916	-5.61629468213848	24.678571428571427	One	Core
Chr1	7124995	7125254	Unsp	0.20360730337078697	0.35521235521235495	0.696491228070175	5.570271989050809	8.7165881088287	7.79234356388715	8.66395745355677	-6.643856189774719	29.75	Two	Core
Chr1	7125430	7126007	LTR	0.18436	0.257894736842105	1.54515050167224	5.03065184543009	8.89243812399772	9.03737527252874	6.806641853057069	-4.95580019608947	30.571428571428573	One	Core
Chr1	7126091	7126724	Unsp	0.156023783783784	0.202211690363349	1.0978835978836	5.03065184543009	8.32980210482594	8.44757454329139	5.40770990202613	-5.5218656653961204	33.25	One	Core
Chr1	7126724	7127243	LTR	0.117177958015267	0.14643545279383402	1.2528735632183898	5.03065184543009	9.068157417235732	8.526456702981301	3.55183195034666	-6.643856189774719	33.833333333333336	One	Core
Chr1	7127261	7127964	Unsp	0.25803097183098606	0.254623044096728	1.27378598110305	5.03065184543009	9.65267805326794	9.07868304011247	6.4790437324673	-5.243676649223	21.75	One	Core
Chr1	7128003	7129306	Unsp	0.255975082912761	0.19800460475825002	1.1532976827094499	5.03065184543009	9.59108483028045	8.43058745544083	5.03143156195257	-4.82205975532864	33.42857142857143	One	Core
Chr1	7129355	7129942	Unsp	0.110949134125637	0.146507666098807	1.15254237288136	5.03065184543009	8.2287634699682	8.581362164520499	3.8626257655332203	-6.643856189774719	37.714285714285715	One	Core
Chr1	7130005	7132571	Unsp	0.229345501138952	0.182774746687451	1.1493369499698602	5.03065184543009	9.27738932712897	8.54940990189694	4.8351432466882	-4.4973901611564004	31.115384615384617	One	Core
Chr1	7133173	7136584	Unsp	0.22025101298701302	0.19613016710642003	1.2010076537635601	5.03065184543009	9.461719738270368	8.1798961880217	4.78340077940153	-5.00037722448663	32.371428571428574	One	Core
Chr1	7136584	7137057	LTR	0.290985863453815	0.34460887949259994	1.3251461988304098	5.03065184543009	10.3543764576004	8.950339533847881	7.430872126986901	-5.4493531656117495	5.666666666666667	One	Core
Chr1	7137057	7143038	LTR	0.220428395185557	0.34893830463133296	1.64513653569242	5.03065184543009	10.1750606335847	8.524831077757161	7.568102938723099	-4.99015631907509	3.3114754098360657	One	Core
Chr1	7143038	7143520	LTR	0.274294793713163	0.35062240663900396	1.2090395480226002	5.03065184543009	9.403139149345769	8.61707323973102	7.976478488112989	-5.05029339508471	4.5	One	Core
Chr1	7143612	7150336	LTR	0.0884835614035088	0.185222417692888	1.2297260574183702	5.03065184543009	9.1100354800335	8.4801114166443	7.0039100890956405	-5.79328648710166	32.55882352941177	One	Core
Chr1	7143704	7144336	Unsp	0.132714060606061	0.219936708860759	1.33393829401089	5.03065184543009	9.888078863061	8.29472980455452	5.60900230440089	-5.31321087778625	25.714285714285715	One	Core
Chr1	7147221	7149078	DNA	0.000538213132400431	0.510500807754443	-0.40021208907741296	5.03065184543009	8.550439975450539	8.26790793751374	8.51928491899683	-6.226602723370299	32.10526315789474	Two	Core
Chr1	7150338	7151023	Unsp	0.269457325746799	0.274452554744526	1.29475833900613	5.03065184543009	10.4321804393986	9.300789678071279	6.62189254233233	-4.998772696616	28.375	One	Core
Chr1	7151080	7152367	Unsp	0.246775	0.201243201243201	1.28991596638655	5.03065184543009	9.619434355756662	8.56592060654722	5.67244826433986	-5.5641635474947595	35.785714285714285	One	Core
Chr1	7152429	7153011	Unsp	0.125953595890411	0.187285223367698	1.05987445678416	5.03065184543009	9.88445944219182	8.514767703398451	4.5985841878343	-6.643856189774719	36.142857142857146	One	Core
Chr1	7153080	7154199	Unsp	0.23785428940568498	0.204647006255585	1.25942768411713	5.03065184543009	10.0243505695267	8.412218151105531	5.27175604098352	-4.23336670835208	31.75	One	Core
Chr1	7154192	7154734	Unsp	0.241527408056042	0.193726937269373	1.21820175438596	5.03065184543009	10.313045505977199	8.89644381896887	5.31777274671646	-4.86185684199402	32.857142857142854	One	Core
Chr1	7154803	7155385	Unsp	0.14332286689419801	0.18213058419244	1.26943881000676	5.03065184543009	10.158626928977599	8.54895621492944	4.71573844800684	-6.643856189774719	35.0	One	Core
Chr1	7155434	7155555	Unsp	0.28256354838709696	0.20661157024793397	1.55555555555556	5.03065184543009	11.2762307929611	8.07921381284037	6.647170624402981	-6.643856189774719	29.5	One	Core
Chr1	7155555	7161132	LTR	0.0881419691535151	0.177497749774978	1.18014443014443	5.03065184543009	9.75325400820803	8.40553765664605	4.89175986834642	-5.5630337100247695	34.14035087719298	One	Core
Chr1	7161163	7168492	LTR	0.0844601723095526	0.194736041381409	1.2073026467964199	5.03065184543009	9.633775861687289	8.3007366988834	6.136088960771411	-5.33392919235756	30.91891891891892	One	Core
Chr1	7162356	7162992	Unsp	0.08703999999999999	0.29874213836478003	1.4225874867444301	5.03065184543009	9.545650628716981	8.94798132329379	6.640406914512051	-5.66155819150818	17.142857142857142	One	Core
Chr1	7168189	7168400	Unsp	0.28879295154185	0.28436018957346004	1.53272727272727	5.03065184543009	10.3331832241934	9.41925357250827	6.294508770538191	-6.643856189774719	28.666666666666668	One	Core
Chr1	7168492	7175433	LTR	0.0884953272101033	0.218700475435816	1.24079762453284	5.03065184543009	9.84490401846136	8.44346403914715	6.02488364826267	-5.3335045895462505	26.859154929577464	One	Core
Chr1	7175443	7180491	LTR	0.0885617886822319	0.202461294164351	1.25325781362228	5.03065184543009	9.82401257871778	8.43613802149459	5.590567445393059	-4.97379315174967	30.058823529411764	One	Core
Chr1	7180491	7181654	LTR	0.0840868610634648	0.210754553339115	1.3386243386243402	5.03065184543009	10.0144399823983	8.73761914118122	5.28228289208836	-4.599462070416269	34.15384615384615	One	Core
Chr1	7181654	7183195	LTR	0.11423997333333301	0.204713804713805	1.23755274261603	5.03065184543009	9.96466772915586	8.72753816153888	4.87535886273666	-4.52837897235479	35.125	One	Core
Chr1	7183195	7185456	LTR	0.13632837670930698	0.22547714158899199	1.23849878934625	5.03065184543009	9.837420931173261	8.55792600376162	5.663993963937041	-5.94686707131946	34.791666666666664	One	Core
Chr1	7185464	7185649	LTR	0.205837486910995	0.24864864864864897	1.18858560794045	5.03065184543009	10.7842643589664	9.20987010932518	6.7374369874368	-6.643856189774719	32.333333333333336	One	Core
Chr1	7186693	7186844	Unsp	0.27489529411764696	0.24503311258278102	1.6666666666666698	5.03065184543009	9.56140120746938	9.333904552821268	6.12514415374131	-3.0082676159836	33.0	One	Core
Chr1	7187216	7187450	Unsp	0.22147824701195198	0.25213675213675196	1.46616541353383	5.03065184543009	10.292056524532699	9.18794473056845	7.118786092312959	-6.643856189774719	33.666666666666664	One	Core
Chr1	7189629	7189909	LTR	0.22937174545454503	0.29642857142857104	1.5027027027027	5.03065184543009	10.4858869773997	8.78755642458219	6.25551160829894	-4.49060992947904	33.0	One	Core
Chr1	7190591	7193659	LTR	0.17165787206266298	0.228872081552121	1.21468856676396	5.03065184543009	10.1494457365426	8.405590117179559	7.49482432310978	-5.363748270581991	33.96875	One	Core
Chr1	7193672	7198068	LTR	0.125205605978261	0.20839008444565502	1.24814570022766	5.03065184543009	9.726316562539509	8.44351238712516	5.94695249520868	-5.12561980285438	30.977777777777778	One	Core
Chr1	7196349	7196987	Unsp	0.102123836858006	0.286833855799373	1.4592004381161001	5.03065184543009	9.70650241776343	8.485928166912089	6.6177231216005	-5.26534456652099	10.857142857142858	One	Core
Chr1	7198031	7199153	Unsp	0.256070008764242	0.186274509803922	1.1734693877551001	5.03065184543009	9.838146196483288	8.72343524172504	5.09943039776716	-4.7647105846491105	36.333333333333336	One	Core
Chr1	7199153	7201199	LTR	0.17376131400966197	0.25610948191593397	1.31533561979422	5.03065184543009	10.0637126711736	8.6159135436517	6.56008352263093	-5.15917091751204	32.142857142857146	One	Core
Chr1	7201199	7208694	LTR	0.0870260817626759	0.201736806947228	1.2223691914044699	5.03065184543009	9.539850344855891	8.378737063916951	5.21214878400578	-5.23814448276798	29.5	One	Core
Chr1	7208762	7210847	LTR	0.141509723479135	0.235084140744518	1.3514821536600101	5.03065184543009	9.83170927207118	8.40391076032696	6.37988091927091	-5.1249828795113395	34.22727272727273	One	Core
Chr1	7210844	7211005	LTR	0.272918448275862	0.39130434782608703	2.13095238095238	5.03065184543009	10.703608748695	9.10079604827546	8.42350888774892	-6.643856189774719	30.333333333333332	One	Core
Chr1	7211136	7218854	LTR	0.108637413651316	0.21722924000828303	1.2782322701896	5.100184687091179	9.39994112636677	8.38502795626856	7.43503172748603	-5.48973304445531	31.21794871794872	One	Core
Chr1	7212263	7214120	DNA	0.000538213132400431	0.510500807754443	-0.40021208907741296	5.03065184543009	8.495273792947769	8.23971595930645	8.408332715726099	-6.37351131907457	31.95	Two	Core
Chr1	7219489	7227696	LTR	0.0835241380232714	0.201453371013323	1.2210615471485	5.03065184543009	9.14311644573553	8.57373229522657	5.4673551889771295	-4.98627007291631	29.927710843373493	One	Core
Chr1	7225223	7225860	Unsp	0.096908734939759	0.281004709576138	1.3548951048951101	5.03065184543009	10.0044658053052	8.44880252361074	6.44500083239962	-5.40661918688765	17.571428571428573	One	Core
Chr1	7227696	7234563	LTR	0.0721674467159635	0.519440803844474	-0.34624867911236396	7.17453976119132	7.13240518557066	7.77501405223457	9.066628302037369	-6.24811166496261	20.214285714285715	Two	Core
Chr1	7234744	7235381	Unsp	0.10351468277945598	0.271585557299843	1.32558139534884	5.03065184543009	9.182126127303858	8.35938608814232	6.45529831341947	-3.73916986509294	21.142857142857142	One	Core
Chr1	7235419	7240515	LTR	0.055086141238365	0.19637030995106	1.2618512867111298	5.03065184543009	8.970950315857019	8.450954246187349	5.068834194590379	-4.90554291214677	22.865384615384617	One	Core
Chr1	7239335	7240102	Unsp	0.295207303070761	0.213820078226858	1.34	5.03065184543009	8.22637753590414	8.66745269986229	4.57286438961528	-6.643856189774719	22.77777777777778	One	Core
Chr1	7240515	7241150	Unsp	0.11087477272727302	0.237795275590551	1.35356695869837	5.03065184543009	8.48956202226797	8.81384660419045	6.00521440753157	-5.632912812088139	15.714285714285714	One	Core
Chr1	7241233	7241429	Unsp	0.114917647058824	0.280612244897959	1.7916666666666698	5.03065184543009	10.114847270758599	9.85564626546291	7.26361233918296	-6.643856189774719	28.666666666666668	One	Core
Chr1	7241512	7242069	Unsp	0.114653447684391	0.22800718132854603	1.26421568627451	5.03065184543009	10.2371717522254	8.954037466666119	6.17768844750481	-5.75266967691365	25.666666666666668	One	Core
Chr1	7242069	7248998	LTR	0.380026022908511	0.19945158031462	1.21306432033935	5.03065184543009	9.34790692212324	8.35130730290398	5.235228301187321	-4.94952581538149	19.514285714285716	One	Core
Chr1	7248995	7254186	LTR	0.0626464128563229	0.178385667501445	1.2395495791945301	5.03065184543009	8.543501061654121	8.41796612295175	5.2485073878277095	-4.81031733591347	28.60377358490566	One	Core
Chr1	7254182	7255206	Unsp	0.139708019271949	0.265625	1.24858757062147	5.03065184543009	8.97928083638388	8.87425520314492	6.54447104925282	-5.36153995078622	26.416666666666668	One	Core
Chr1	7254775	7255618	Unsp	0.25416595238095196	0.270462633451957	1.2695675971538	5.15012889933759	8.80254617275384	8.97061775424501	7.29059466077223	-5.57560353655146	24.2	One	Core
Chr1	7334489	7334700	Unsp	0.16176	0.5876777251184829	0.116959064327485	5.6313734706817105	0.0	9.08100932783266	9.564222136812061	-6.08782469102422	0.0	Three	Core
Chr1	7371901	7372226	DNA	0.241279027355623	0.44	0.285869565217391	5.362970710730679	0.623645134854671	7.3357600529614695	9.858558825424499	-6.20463532250233	0.0	Three	Core
Chr1	7412147	7412342	Unsp	0.34935690821256	0.5025641025641029	0.245714285714286	5.03065184543009	6.983393900620951	8.57531798611918	9.31582796352796	-5.8597528998184005	0.0	Two	Core
Chr1	7508356	7508560	Unsp	0.227808486238532	0.38235294117647106	-0.263157894736842	5.7766057733787095	8.72174149942322	8.8664190116524	8.47921164865617	-5.86624861111117	19.333333333333332	Two	LS
Chr1	7508771	7508883	Unsp	0.255799590163934	0.3125	1.33333333333333	5.03065184543009	8.98777700015735	11.3498356486406	8.25241829684027	-5.1980564367251905	16.0	One	LS
Chr1	7508942	7510144	Unsp	0.274924563106796	0.363560732113145	1.6337868480725601	5.03065184543009	8.75274605749531	9.24879428631813	8.19876553418664	-3.6918709067032003	15.461538461538462	One	LS
Chr1	7510144	7510620	LTR	0.051792828685259	0.51890756302521	-0.37866224433388596	5.03065184543009	7.50865833260955	7.93108737651166	9.52096297689775	-6.04736678252756	13.833333333333334	Two	Core
Chr1	7510620	7516603	LTR	0.0791642833333333	0.521477519638977	-0.38430216103203707	6.595065302000611	6.6965057958813095	7.70906356973013	9.05100697920844	-6.317265231203259	18.39344262295082	Two	Core
Chr1	7516603	7517079	LTR	0.051792828685259	0.51890756302521	-0.37866224433388596	5.03065184543009	8.23127984476297	8.18325476408412	9.474269564114632	-6.24807324757583	15.0	Two	Core
Chr1	7517079	7522722	LTR	0.0652110482142857	0.308915490441308	1.62906435658053	5.03065184543009	8.985917832106018	9.00591940743432	7.66016739406454	-3.90214701176546	15.948275862068966	One	Core
Chr1	7522722	7522907	Unsp	0.266274029850746	0.318918918918919	1.44805194805195	5.03065184543009	9.3806714211743	9.87621969155752	8.31335731280515	-3.9082522710667402	17.666666666666668	One	Core
Chr1	7523011	7527149	Unsp	0.08724327821711	0.29265345577573704	1.35184781985905	6.234049498985129	8.36254776318361	9.01464575729532	7.4570843902896105	-4.055494655040009	17.976190476190474	One	Core
Chr1	7569445	7569697	DNA	0.158329618320611	0.468253968253968	-0.0268817204301075	5.09975004453444	0.763867841938722	7.33382896109052	10.5154564470071	-6.393193708609901	0.0	Three	Core
Chr1	7594685	7594857	Unsp	0.27063505494505496	0.5290697674418611	1.6357142857142901	5.03065184543009	2.0263793243136696	9.59004064342359	9.309884022337618	-6.643856189774719	0.0	Three	Core
Chr1	7630445	7630611	Unsp	0.27462065573770494	0.518072289156627	-0.25	5.608104171792071	8.08626827109266	8.34797590550115	9.608082114524109	-6.40798224174237	0.0	Two	Core
Chr1	7648945	7649460	Unsp	0.29420188235294104	0.5786407766990289	-0.47643097643097604	5.100184687091179	6.839326873024381	8.508109661844571	9.57879444883999	-6.26887351245226	0.0	Two	Core
Chr1	7650636	7650761	Unsp	0.334214453125	0.568	-1.16666666666667	5.03065184543009	8.59521491450444	9.792342106607052	9.869875431722981	-6.20101199495786	0.0	Two	LS
Chr1	7669428	7669629	Unsp	0.2044	0.567164179104478	0.0	5.17425132346575	6.656326815224191	8.91173760664853	9.897252575207869	-6.643856189774719	0.0	Two	Core
Chr1	7682373	7682801	Unsp	0.357653642384106	0.5046728971962621	-0.235523747560182	5.767505165632301	5.09744392222585	7.90999203394732	9.239076337332131	-6.349308289814861	0.0	Two	Core
Chr1	7682805	7682984	Unsp	0.251142797927461	0.5754189944134079	-0.36931818181818205	5.44610000351058	6.3350178234393	8.1812004902281	9.86242531708901	-6.17488412018205	0.0	Two	Core
Chr1	7712182	7712303	Unsp	0.26727390625	0.47107438016528896	-1.54545454545455	5.10471848180467	7.64073833823887	9.359859839815359	9.6163963425108	-5.60793661551978	0.0	Two	LS
Chr1	7712826	7713504	LTR	0.43377871532846707	0.46607669616519204	-0.31	5.03065184543009	0.601790660506266	9.33313063265978	8.732933130296018	-6.1263811821599505	0.0	Three	LS
Chr1	7714159	7714339	Unsp	0.149838095238095	0.46666666666666706	0.49074074074074103	5.100184687091179	7.245428937584079	9.89525098089225	9.33599812297974	-5.339001608246299	0.0	Two	LS
Chr1	7723081	7723480	LTR	0.234941411192214	0.399497487437186	0.988461538461539	5.03065184543009	7.866881878438081	8.47568355347662	8.84157845900614	-4.55892719560698	0.0	One	Core
Chr1	7726622	7726772	LTR	0.122653475609756	0.52	0.38636363636363596	5.173816680909019	3.37949645496601	9.10483839649723	8.978641027789221	-6.643856189774719	3.0	Three	Core
Chr1	7726874	7731761	LTR	0.0884352531256405	0.27866143358810197	1.35577073246916	6.56019304249142	8.1741293197153	8.76938541045962	6.8400627274687	-4.10815182974057	13.4	One	Core
Chr1	7767057	7767300	Unsp	0.165416987951807	0.432098765432099	0.303030303030303	5.672992730364269	7.54741301203081	7.74962520601025	9.62556188084991	-6.3560877595862495	0.0	Two	Core
Chr1	7805208	7805390	Unsp	0.34814651685393294	0.456043956043956	-0.397727272727273	5.03065184543009	7.98667799742651	8.81231410568999	9.11845017877158	-5.44830538065692	0.0	Two	Core
Chr1	7813185	7819058	LTR	0.00365665896843726	0.533127293799498	-0.797188626658825	5.15012889933759	5.71096085765913	6.934181999217781	9.377040704201189	-6.2109519211736295	15.866666666666667	Two	Core
Chr1	7861883	7862149	Unsp	0.2926555859375	0.582706766917293	-0.679738562091503	6.76388238291558	7.95962421959126	6.96583162867661	9.708702394180609	-6.2288186904958796	0.0	Two	Core
Chr1	8155926	8156027	Unsp	0.17486740740740697	0.465346534653465	1.5	5.09975004453444	1.4605185878053102	8.008778736531	10.1600348122465	-5.9826581032264805	0.0	Three	Core
Chr1	8185849	8186145	Unsp	0.243474376996805	0.398648648648649	0.52	5.7387729847873095	3.54727869440508	9.72904789269766	8.3274493204742	-6.41141010377435	0.0	Three	Core
Chr1	8187807	8187915	Unsp	0.18205	0.555555555555556	2.9	5.03065184543009	1.39914436357115	7.71131624170201	10.7655106271817	-6.105329262043849	0.0	Three	Core
Chr1	8194091	8194814	Unsp	0.11133888888888901	0.307053941908714	1.30557834290402	5.100184687091179	6.412887601824651	8.666205234435031	7.3696013799009	-4.44884020736958	1.4444444444444444	One	Core
Chr1	8298983	8299104	Unsp	0.34140416	0.47933884297520707	1.26666666666667	5.03065184543009	0.0	9.76142409165863	9.12927189969333	-6.313791879808679	0.0	Three	Core
Chr1	8299279	8299489	Unsp	0.146536578947368	0.595238095238095	0.270676691729323	5.03065184543009	5.4513406163732006	9.47126179496413	9.39102013703151	-6.03380270809074	0.0	Two	Core
Chr1	8302551	8302665	Unsp	0.275370491803279	0.56140350877193	-1.6	5.6228520451796795	0.0	9.25776332402628	9.589186825905461	-6.021784631032691	0.0	Three	Core
Chr1	8308881	8309126	DNA	0.299522162162162	0.43265306122448993	0.0909090909090908	5.22822020606754	0.780782593077215	7.429670896003441	9.87593088927997	-6.643856189774719	0.0	Three	Core
Chr1	8352301	8352422	Unsp	0.11318433070866099	0.45454545454545503	0.5714285714285711	5.5441835099535295	0.0	8.5984285728572	10.012613412507	-6.643856189774719	8.0	Three	Core
Chr1	8352767	8352889	Unsp	0.105288503937008	0.43442622950819704	2.9	5.2739259169181105	8.76138567575427	8.17994279990603	9.83436348424774	-6.643856189774719	6.0	Two	Core
Chr1	8534101	8534254	Unsp	0.261986047904192	0.542483660130719	-0.5686274509803921	5.03065184543009	0.0	9.92328420572443	9.7129265587155	-6.16332539119785	0.0	Three	Core
Chr1	8541776	8541917	DNA	0.33702344827586195	0.33333333333333304	0.944444444444444	5.03065184543009	7.343771875817	10.3262187860272	8.78282513096651	-6.643856189774719	0.3333333333333333	Two	Core
Chr1	8542166	8542300	DNA	0.315849927536232	0.32089552238805996	0.4375	5.03065184543009	8.70031690947302	10.9978788216891	9.08787040270617	-6.643856189774719	0.5	Two	Core
Chr1	8551334	8551468	Unsp	0.279927746478873	0.597014925373134	1.5833333333333302	5.03065184543009	1.21247465254365	9.846427166386801	9.49231588809227	-6.45350211458426	0.0	Three	Core
Chr1	8651253	8651380	Unsp	0.0943251908396947	0.5118110236220471	0.0526315789473685	5.100184687091179	7.39114963673496	7.45395435222648	9.22768856499556	-6.643856189774719	0.0	Two	Core
Chr1	8684847	8685036	Unsp	0.168315099009901	0.582010582010582	0.427631578947368	5.03065184543009	6.62724385547341	10.3067607650137	9.41115309971312	-6.13296597324038	0.3333333333333333	Two	LS
Chr1	8712294	8712627	LTR	0.264370970588235	0.46846846846846796	-0.746296296296296	5.03065184543009	7.42170868793332	9.97537624482369	9.27401774587507	-6.3697973152547895	3.6	Two	Core
Chr1	8743809	8744087	LTR	0.256424296296296	0.42805755395683504	0.28498985801216997	5.03065184543009	8.241795938098559	9.2955802567581	8.317906301600459	-5.830269314005611	0.3333333333333333	Two	LS
Chr1	8744108	8744240	DNA	0.18497436619718302	0.393939393939394	-0.0166666666666667	5.03065184543009	8.914342167080259	9.46747360776928	8.93315279138193	-5.9991874429293	0.5	Two	LS
Chr1	8744738	8744866	Unsp	0.245242706766917	0.4453125	-0.5615384615384611	5.03065184543009	1.25070987568727	10.531534596595401	9.29018220405921	-6.01209947757463	0.0	Three	LS
Chr1	8745417	8745600	Unsp	0.20906620000000004	0.5464480874316939	0.6098901098901099	5.03065184543009	0.0	10.020913704400199	9.62259618410221	-6.37441745874701	0.0	Three	LS
Chr1	8755699	8755915	DNA	0.190507792207792	0.435185185185185	-0.29006085192697806	5.58795219910259	1.7844003822404702	8.14872598999787	9.75346278983449	-6.43945626011132	0.0	Three	Core
Chr1	8756888	8757068	Unsp	0.325656042780749	0.522222222222222	-0.0909090909090908	5.03065184543009	7.9350122613704	9.29985368036744	9.720455457651731	-6.4835699806001195	0.0	Two	Core
Chr1	8783746	8783927	Unsp	0.27095915	0.530386740331492	0.38509316770186297	5.03065184543009	6.6893584544023	9.40002394194258	9.23071756966454	-6.398743691938191	0.0	Two	Core
Chr1	8784437	8784605	Unsp	0.202646467391304	0.5416666666666671	-0.4	5.03065184543009	8.16699996409804	9.839940474036661	9.328062194428119	-5.76572819330374	0.0	Two	Core
Chr1	8784607	8784789	Unsp	0.252342974358974	0.505494505494505	0.25	5.03065184543009	7.70818126376427	10.4582239898254	9.217433229780141	-5.838043982219019	0.0	Two	Core
Chr1	8809894	8810095	Unsp	0.192153846153846	0.582089552238806	0.22924901185770802	5.09975004453444	5.456996047167469	8.493307980883431	9.91218731988284	-5.81096617560998	0.0	Two	Core
Chr1	8828176	8828308	DNA	0.262959142857143	0.37878787878787895	0.214285714285714	5.03065184543009	7.45013743906065	9.265325230112891	8.7824706378937	-6.0298493943979095	11.0	Two	Core
Chr1	8832541	8838414	LTR	0.00365665896843726	0.533127293799498	-0.797188626658825	5.72104602725903	5.60439422178664	7.03045618486891	9.356509122266822	-6.251055902399111	15.766666666666667	Two	Core
Chr1	8887534	8887715	Unsp	0.14681438144329903	0.535911602209945	0.40526315789473705	5.03065184543009	6.15143080795331	10.678752434361698	9.23071756966454	-5.790697578104	0.0	Two	Core
Chr1	8894403	8894603	Unsp	0.21982954545454503	0.55	0.937142857142857	5.539507402925531	7.9462767603094395	9.04248062673367	9.50586026351698	-6.43710894931511	0.0	Two	Core
Chr1	8909721	8909884	Unsp	0.270103621621622	0.515337423312883	0.214285714285714	5.51647575960701	6.58757982138069	7.9623480801028395	9.59849740961006	-6.643856189774719	0.0	Two	Core
Chr1	8991118	8991309	Unsp	0.330173301886792	0.534031413612565	-0.0707070707070707	5.03065184543009	9.177877925770401	9.434393617022302	9.79239719075234	-6.3377029066477295	0.6666666666666666	Two	LS
Chr1	8997285	8997499	LTR	0.30834140969163	0.45327102803738295	0.258333333333333	6.26244342248469	0.0	8.55604941406229	10.1014325253401	-6.467050774055821	0.0	Three	LS
Chr1	9115986	9116171	Unsp	0.24977306122449	0.545945945945946	-0.0476190476190477	5.03065184543009	8.48413827804211	8.77613446603783	9.27637786228269	-6.40122297600065	0.0	Two	Core
Chr1	9137723	9137879	LTR	0.141682395209581	0.5512820512820511	-0.6875	6.96075554649966	8.03405804726447	7.122204056103691	10.7193798137095	-6.643856189774719	0.0	Two	Core
Chr1	9187245	9187406	LTR	0.15064899408284	0.509316770186335	1.0	5.1352948761526696	7.33959778020033	7.909467371455821	9.630010922518311	-6.643856189774719	1.3333333333333333	Two	Core
Chr1	9187505	9190202	LTR	0.0928035908921239	0.21764923989618104	1.30995475113122	5.03065184543009	7.7311187183098795	8.654531074000209	6.95855258954254	-3.9682160214243503	18.178571428571427	One	Core
Chr1	9190202	9190696	LTR	0.0613167816091954	0.506072874493927	-0.302941176470588	5.100184687091179	7.63627826962726	8.232520929795179	9.36716657862506	-6.279999138814139	15.4	Two	Core
Chr1	9190696	9196679	LTR	0.0793429033333333	0.521644659869631	-0.38053085199824294	5.03065184543009	6.74300773835118	7.694201923561059	9.04594493122009	-6.2381639833960305	19.24590163934426	Two	Core
Chr1	9196679	9197155	LTR	0.051792828685259	0.51890756302521	-0.37866224433388596	5.03065184543009	7.8225509431052105	7.6705451981527695	9.5143843041022	-5.985727276491599	12.666666666666666	Two	Core
Chr1	9197155	9199333	LTR	0.0955554909090909	0.24563820018365498	1.2277731616119698	5.82369805943969	8.04665756418489	8.8934644067356	6.931486147583519	-4.5304317544895305	15.217391304347826	One	Core
Chr1	9214094	9214421	DNA	0.21808894578313298	0.418960244648318	0.151544401544402	5.51816062281016	7.2327555417076095	7.9753011361236705	9.42562708747825	-6.16332539119785	0.0	Two	Core
Chr1	9221495	9221746	DNA	0.169886692015209	0.43426294820717104	0.0411764705882354	6.389582147144691	0.0	7.07203161707119	9.40713896108052	-6.643856189774719	0.0	Three	Core
Chr1	9255072	9255244	Unsp	0.298420552486188	0.47093023255814	0.6	5.3024636334589905	2.35004900876018	10.2377576188188	9.044135925132359	-6.151176820056571	2.0	Three	LS
Chr1	9261057	9261323	LTR	0.266414871794872	0.46616541353383506	-0.206744868035191	5.9288407761869095	5.9189671138282405	10.3691667816645	9.48271928132801	-5.493613554194111	0.0	Two	LS
Chr1	9262526	9262651	Unsp	0.12171511627907	0.568	-0.25	5.03065184543009	0.0	9.833259107967859	9.85499256076027	-6.643856189774719	0.0	Three	LS
Chr1	9274983	9275110	LTR	0.30312288288288297	0.46456692913385794	1.1168831168831201	5.322580407735781	9.65733571028181	11.788665076450801	9.12561523540397	-5.29990178855736	7.666666666666667	One	Core
Chr1	9275088	9275343	Unsp	0.181845787401575	0.29019607843137296	1.35714285714286	5.03065184543009	8.73207354960071	11.630730216833198	8.480953361610531	-4.97759358695172	8.75	One	Core
Chr2	73	1490	DNA	0.00422095003518649	0.551164431898377	-0.558441558441558	7.49165648597592	7.150323080807119	7.692681090029651	8.99606366194827	-6.41903294218351	31.266666666666666	Two	LS
Chr2	5888	5990	Unsp	0.27006405660377397	0.519607843137255	-0.595238095238095	5.41686997233837	2.16009760308311	10.5548335401513	9.655762768180221	-6.643856189774719	0.0	Three	LS
Chr2	118811	119428	Unsp	0.34826832520325196	0.5397082658022689	-0.9426229508196721	5.09975004453444	6.703864021147469	9.42732593797708	9.1563510877426	-6.13248671540309	0.0	Two	LS
Chr2	172727	172937	Unsp	0.17522096069869	0.547619047619048	1.08888888888889	5.03065184543009	6.12394773953931	9.09455508601515	9.5272147579659	-5.99377182224066	0.0	Two	Core
Chr2	204933	205073	Unsp	0.307081931034483	0.478571428571429	0.155555555555556	5.35315680208378	1.17663168414485	7.60308428644071	9.452462038947461	-6.643856189774719	1.0	Three	Core
Chr2	220420	220629	Unsp	0.260555066079295	0.483253588516746	1.83939393939394	5.03065184543009	6.649564198065691	10.715444257522401	9.45395956795442	-6.4176198409008895	1.0	Two	Core
Chr2	231292	231469	Unsp	0.15324972972973	0.45197740112994395	0.0314285714285714	5.03065184543009	0.996747285142244	8.56762799761109	9.9980515925832	-6.34220048991362	1.0	Three	Core
Chr2	231696	231896	Unsp	0.198866359447005	0.515	0.257692307692308	5.03065184543009	0.9110691610691891	8.6121676190213	9.56783767626756	-5.9231853262004295	1.0	Three	Core
Chr2	233099	233288	Unsp	0.28222247572815506	0.5714285714285711	-0.206349206349206	5.03065184543009	7.5427127713747195	8.6102094223867	9.709196808743881	-6.268481040755599	0.0	Two	Core
Chr2	243361	243578	Unsp	0.305528623853211	0.42857142857142894	-0.0565610859728507	6.04890188887917	0.0	7.780350251118961	9.85951038805236	-6.315301772767381	0.0	Three	Core
Chr2	263126	263334	LTR	0.370769326923077	0.4375	-0.731060606060606	5.03065184543009	0.0	8.39006983960326	9.091611481255221	-6.643856189774719	0.0	Three	Core
Chr2	306002	306209	Unsp	0.259294545454545	0.45410628019323707	-0.807017543859649	5.03065184543009	0.8879313003271491	7.47233167870785	9.167882897923052	-6.03813512888677	0.0	Three	Core
Chr2	306884	307075	Unsp	0.176927607655502	0.565445026178011	0.0641711229946524	5.48043005847243	7.62509929413268	7.8764884409297	9.78899443547761	-6.643856189774719	0.0	Two	Core
Chr2	307872	308133	DNA	0.244027	0.49425287356321795	-0.25	5.23845559855887	0.0	6.3110962886202	9.488862927564051	-6.132355850994589	0.0	Three	Core
Chr2	330400	330721	DNA	0.190719357798165	0.485981308411215	-0.10526315789473699	5.03065184543009	0.0	7.3242099208032	9.06167162870455	-6.17539620325526	0.0	Three	Core
Chr2	343556	343799	Unsp	0.19250408	0.460905349794239	-0.313131313131313	5.20482771781376	5.9329056635985005	6.9677594598061	9.39897440990937	-6.643856189774719	0.0	Two	Core
Chr2	348926	349028	Unsp	0.1722675	0.411764705882353	-0.25	6.08237490338638	1.45139600637817	6.62107311224043	9.500048737918881	-6.643856189774719	1.5	Three	Core
Chr2	349035	349836	Unsp	0.148302324455206	0.35081148564294606	0.5939500640204871	5.6419296453746295	8.33219920263391	8.4495609653739	7.802679250752231	-4.11018840277193	15.11111111111111	One	Core
Chr2	349836	352419	Unsp	0.0615603636363636	0.311265969802555	1.5585841749191103	5.03065184543009	8.13222534542719	8.58150913521459	7.5314577365928	-3.7475425495687698	10.814814814814815	One	Core
Chr2	352419	353243	Unsp	0.0812569230769231	0.344660194174757	1.97530864197531	5.03065184543009	9.27234232729297	8.758777509757191	8.01693151057264	-3.55835007612787	9.222222222222221	One	Core
Chr2	353357	353554	Unsp	0.26212846153846203	0.304568527918782	1.72727272727273	5.03065184543009	9.235067777012869	9.47205502764255	8.63633464891148	-3.80131183925482	12.666666666666666	One	Core
Chr2	353554	357613	LTR	0.06886927629942799	0.328521652563464	1.53252794214333	5.03065184543009	8.62247423336151	8.6332082189841	7.9101386167688705	-3.87670515068441	10.023809523809524	One	Core
Chr2	357613	364560	LTR	0.0692045903045903	0.5173456168130129	-0.27531272050805106	9.084342644796788	6.979427354925929	7.66525228418992	9.13040747746864	-6.2462609811501695	16.84285714285714	Two	Core
Chr2	364560	366727	LTR	0.0729755832180728	0.35394554683894797	1.8262560069899498	5.03065184543009	7.6623289999215105	8.483050145444091	8.15871504236114	-3.3511307644697403	15.0	One	Core
Chr2	366727	367358	Unsp	0.27426346749226	0.38510301109350203	0.9699530516431931	5.03065184543009	8.15454990524863	8.6067105156636	8.158732663711	-4.109812177257759	16.0	One	Core
Chr2	367569	367771	Unsp	0.18953317972350198	0.36633663366336605	0.6388888888888891	5.19782060273641	6.9531091470946595	7.840361131066491	8.77285737206534	-5.15190623902315	11.0	One	Core
Chr2	367767	367908	Unsp	0.172520540540541	0.439716312056738	0.166666666666667	5.1352948761526696	1.17087398816528	6.89467984331321	9.35112227554366	-5.238761493743461	0.3333333333333333	Three	Core
Chr2	368260	368420	DNA	0.2961042105263161	0.475	0.336363636363636	5.17425132346575	0.0	7.9445991007834005	9.683520844502091	-5.91261558344215	0.0	Three	Core
Chr2	378369	378731	Unsp	0.544453228571429	0.55524861878453	-1.24545454545455	5.37499794034605	7.14718684320065	6.42121986999328	10.0510992992765	-6.182944293362	0.4	Two	Core
Chr2	380085	380334	DNA	0.196936186770428	0.44578313253012003	-0.0761494252873564	5.21253970151793	0.0	6.754827630029481	9.60813590856283	-6.643856189774719	0.0	Three	Core
Chr2	403625	403829	Unsp	0.253272248803828	0.3970588235294121	-0.641414141414141	5.2739259169181105	6.800583129108469	7.21102349023955	9.88178790985943	-6.643856189774719	0.3333333333333333	Two	Core
Chr2	499758	499908	LTR	0.216507483870968	0.226666666666667	1.08095238095238	5.03065184543009	7.412170389037829	8.27611401782619	7.98908112823054	-2.92192341056599	2.0	One	Core
Chr2	499907	500218	Unsp	0.159260923076923	0.305466237942122	0.952503209242619	5.03065184543009	7.389992640166089	8.37031538344934	7.21183497353461	-4.00850340826016	2.0	One	Core
Chr2	500215	500367	LTR	0.195758106508876	0.440789473684211	1.24475524475524	5.03065184543009	6.44067263261448	8.79190763941315	7.92381510102237	-4.11731037527889	3.0	One	Core
Chr2	500498	500822	LTR	0.19058280487804896	0.287037037037037	1.50238095238095	5.09975004453444	8.047803170908491	6.87561331829881	7.42467674462727	-4.599462070416269	17.2	One	Core
Chr2	500822	507702	LTR	0.0713818760856977	0.518895348837209	-0.35387413962635206	5.03065184543009	6.98084544880316	7.64698341145291	9.06172517777076	-6.17341938889261	23.014285714285716	Two	Core
Chr2	507701	513666	LTR	0.0638668560922614	0.52070410729254	-0.373827062242046	5.03065184543009	6.7758295602341905	7.478076876795339	8.95366963928296	-6.267058447960809	22.9	Two	Core
Chr2	513666	520533	LTR	0.0709179866550624	0.519440803844474	-0.35470959796599394	5.03065184543009	7.06581803016611	7.60923581004382	9.070511611842269	-6.259258720267679	23.32857142857143	Two	Core
Chr2	520533	521184	LTR	0.11631804281345601	0.15821812596006102	1.14354838709677	5.03065184543009	8.589120213583879	7.79536824975057	6.1039533986122	-5.4739311883324095	24.571428571428573	One	Core
Chr2	521185	530985	LTR	0.0923438446680899	0.242167568119196	1.25698664469393	5.03065184543009	9.56126372645896	8.114076343755059	6.1087307789664	-5.369334921928361	18.09090909090909	One	Core
Chr2	530986	531126	LTR	0.214023529411765	0.47142857142857103	2.6153846153846203	5.03065184543009	11.1451865409181	7.83643607410206	8.62594430512227	-5.4323520845810105	17.0	One	Core
Chr2	531228	532108	LTR	0.129258221208666	0.197727272727273	1.20540034337443	5.03065184543009	9.49058967326903	7.90750167616831	5.68858780462543	-6.643856189774719	21.1	One	Core
Chr2	532108	540994	LTR	0.102731498417165	0.20092133238837698	1.22668045056105	5.03065184543009	9.840603837807631	7.5139629350872505	5.94849204379891	-5.54117052580016	23.49438202247191	One	Core
Chr2	532442	538348	LTR	0.101493612746796	0.21661152707644102	1.2734162406856397	5.03065184543009	9.85314684689718	7.489953667434059	5.737754936041401	-5.504433276729749	22.383333333333333	One	Core
Chr2	540994	548565	LTR	0.0966714291476203	0.21429536549115	1.2609305269130502	5.03065184543009	10.050883881671199	7.55999655716071	5.346673330526019	-5.973696122358151	20.83116883116883	One	Core
Chr2	548565	551482	LTR	0.10331011866235199	0.220976491862568	1.23448883666275	5.10471848180467	9.8216395936783	7.5779604882396	6.42064037919375	-5.84034674766842	24.933333333333334	One	Core
Chr2	551482	555240	LTR	0.10275258064516099	0.17165184586364904	1.1527219991075401	5.03065184543009	9.44400586450082	7.52595165291334	4.64891250201831	-5.497740888717481	29.128205128205128	One	Core
Chr2	555240	562807	LTR	0.106643502143623	0.23528619528619502	1.28668378576669	5.03065184543009	9.85773724415664	7.48590471906967	5.741830243261029	-5.980291363485559	20.363636363636363	One	Core
Chr2	562807	563552	LTR	0.0970324074074074	0.166442953020134	1.12727272727273	5.03065184543009	9.98631016863782	7.50719198001068	5.676619920495501	-5.42693370879524	25.0	One	Core
Chr2	563552	571170	LTR	0.12850974524868597	0.28022126281705295	1.36540004103942	5.03065184543009	9.962570088355019	7.735609725906791	6.617426254124111	-5.47344619991191	14.883116883116884	One	Core
Chr2	571170	571432	LTR	0.0457388721804511	0.16793893129770998	1.33333333333333	5.03065184543009	10.1584431665124	8.49129845970714	6.179431780156599	-6.643856189774719	16.5	One	Core
Chr2	571432	582124	LTR	0.0899092245989305	0.21901242861941603	1.29065200314218	5.03065184543009	10.034639455011	7.69271727328169	5.52696914551227	-5.08647119451463	22.925925925925927	One	Core
Chr2	572588	580158	LTR	0.10014545184384697	0.220849735306095	1.27034092264972	5.03065184543009	9.95269881093027	7.67543027105104	5.55106040691488	-5.82852987556115	22.506493506493506	One	Core
Chr2	582171	586580	LTR	0.0894921644826028	0.194828759355863	1.24213816316717	5.03065184543009	9.56414702494507	7.50233288389755	4.99075151842667	-5.984503092148469	23.177777777777777	One	Core
Chr2	586580	588370	LTR	0.0949467624633431	0.23978685612788603	1.25854156042835	5.03065184543009	9.89311947882641	7.91093278463622	5.88579755122686	-5.49554352965436	18.263157894736842	One	Core
Chr2	588370	595939	LTR	0.0936881869158879	0.208780880773362	1.2578357230285	5.03065184543009	9.83942191999057	7.54054044187633	5.40355242490435	-6.135089868503799	23.428571428571427	One	Core
Chr2	595939	596986	LTR	0.0981460869565217	0.207171314741036	1.18261589403974	5.03065184543009	10.143344496465199	8.1510042469278	6.01680961162197	-5.3697796131493405	22.545454545454547	One	Core
Chr2	597000	603601	LTR	0.0942036480617661	0.186744073536526	1.22798031011996	5.03065184543009	9.633860856316419	7.2516443912334205	5.162722036732481	-6.225587569232871	25.65671641791045	One	Core
Chr2	599336	599533	LTR	0.0729417587939699	0.299492385786802	1.5317725752508402	5.03065184543009	9.93244331578747	8.740682609187571	6.24657488313239	-5.80599238925598	20.333333333333332	One	Core
Chr2	603601	606705	LTR	0.10939401847575098	0.23994682618810198	1.32649265395436	5.03065184543009	10.1605798903385	7.59654246380062	5.927521630922571	-5.487988087856491	20.625	One	Core
Chr2	606705	619584	LTR	0.0953906528189911	0.2007304206682	1.2194150499706102	5.03065184543009	10.0655924822144	7.682367810785719	6.28639868156083	-5.518183205248901	20.488372093023255	One	Core
Chr2	606965	607117	LTR	0.202357108433735	0.447368421052632	1.97222222222222	5.03065184543009	11.5681361398628	6.801639642527619	8.14088702321455	-6.643856189774719	16.666666666666668	One	Core
Chr2	607216	612105	LTR	0.0998311684275948	0.29991645781119497	1.4461257313438503	5.03065184543009	10.2367191891986	7.57688732077896	6.99726759595739	-5.742194108968019	13.62	One	Core
Chr2	614783	614938	LTR	0.15121449704142	0.52258064516129	1.8	5.03065184543009	11.942638149945	8.951551742686869	8.24105892671888	-4.998772696616	25.666666666666668	One	Core
Chr2	619646	624035	LTR	0.0916296914700545	0.18386876281613102	1.18223564194502	5.03065184543009	9.68000364907107	7.62696835643664	4.47619443532657	-5.687747106547429	27.155555555555555	One	Core
Chr2	624036	627984	LTR	0.126127602323739	0.20875331564986702	1.2495974235104699	5.03065184543009	9.912352291865961	7.536994323098691	5.22122155443987	-6.0691284034812805	27.675	One	Core
Chr2	627984	629519	LTR	0.133592062459336	0.159165035877365	1.07293720078851	5.03065184543009	9.0337232454945	7.017153372204129	4.64752170001723	-5.63658818931069	34.23529411764706	One	Core
Chr2	629521	631300	LTR	0.15247964412811402	0.22228843861740197	1.32104686215401	5.03065184543009	9.925004206615359	7.92918458962537	5.68515946139606	-5.910717375149031	19.61111111111111	One	Core
Chr2	631300	639027	LTR	0.11153501881214699	0.185980551053485	1.1699275958031101	5.03065184543009	9.76187046044422	7.62067113870564	4.95671323997106	-5.56343750731943	33.217948717948715	One	Core
Chr2	632281	632427	LTR	0.20296775	0.431506849315068	2.1666666666666696	5.03065184543009	11.258017406918599	9.07438355235278	7.568937903039559	-6.643856189774719	32.0	One	Core
Chr2	639027	640384	LTR	0.15683342395297598	0.18128224023581402	1.1103814884302698	5.03065184543009	9.94273519719891	7.94286544468409	5.00124696919634	-6.643856189774719	28.428571428571427	One	Core
Chr2	640384	641022	Unsp	0.10328599999999999	0.269592476489028	1.1641887524240502	5.03065184543009	10.7436274045912	8.35226319552662	6.1198109411359	-6.090702427284241	15.75	One	Core
Chr2	641059	643058	LTR	0.0547943810005053	0.224322943280531	1.4127731092437	5.03065184543009	10.198028404269401	7.730288244452269	5.95853807306433	-5.574222001937669	12.476190476190476	One	Core
Chr2	643058	650451	LTR	0.0915356613611416	0.211164713990351	1.26662131453632	5.03065184543009	9.79231347113735	7.6112604617162	5.195901512673809	-5.53259943867298	26.92	One	Core
Chr2	650451	663239	LTR	0.0932238949671772	0.21820722699141504	1.32236709491932	5.100184687091179	9.5656765471867	7.679455083570349	5.49137077139125	-5.53545259715621	20.48062015503876	One	Core
Chr2	654062	661792	LTR	0.0958044585300067	0.214963404716725	1.2650895887557199	5.03065184543009	9.56299205414043	7.6184456516390595	5.3792577567554805	-5.83495248062163	21.025641025641026	One	Core
Chr2	658711	658863	LTR	0.14222254545454502	0.5197368421052629	0.9523809523809521	5.03065184543009	8.67747369367779	7.67707107466432	7.55175642860512	-6.643856189774719	13.0	One	Core
Chr2	663240	665097	DNA	0.000538213132400431	0.510500807754443	-0.40021208907741296	5.03065184543009	8.434375171773889	8.15263609683581	8.5226445646776	-6.2007378150549695	31.894736842105264	Two	Core
Chr2	665099	667226	LTR	0.103447824351297	0.19143576826196498	1.27453815261044	5.03065184543009	9.326240216455599	7.5919218257259	5.26076360967066	-5.61665804844495	24.608695652173914	One	Core
Chr2	667226	667806	LTR	0.147380483271375	0.32956685499058397	1.57347670250896	5.03065184543009	10.0221415346371	8.79576897538688	7.073367440898029	-4.8156225380412	11.857142857142858	One	Core
Chr2	667901	670870	LTR	0.0586834071550256	0.19561493662213103	1.22927784577723	5.03065184543009	8.505875542368129	8.130428353724481	4.808081131430679	-5.20030166725942	18.666666666666668	One	Core
Chr2	669683	670458	Unsp	0.28685521568627503	0.20258064516129	1.27364257461345	5.03065184543009	8.03466882500988	8.429348866188459	4.35663888054333	-5.62920941381032	23.0	One	Core
Chr2	670870	671506	Unsp	0.0967985692771084	0.226415094339623	1.24489795918367	5.03065184543009	9.142745757620052	8.23486152001022	6.362105403047369	-6.643856189774719	11.75	One	Core
Chr2	671589	671998	LTR	0.1952	0.322738386308068	1.44838455476753	5.03065184543009	9.244353646311001	8.689139121220041	7.361396869691321	-6.643856189774719	4.6	One	Core
Chr2	678524	678739	DNA	0.29138858407079604	0.409302325581395	0.0160183066361557	5.03065184543009	1.39914436357115	7.30232921678974	9.81170694055402	-5.85091695735518	0.0	Three	Core
Chr2	694216	694456	Unsp	0.29092552845528497	0.40416666666666706	-0.0779220779220779	5.3026420836662	6.1274263681334995	7.661506816425001	10.032423934592698	-6.643856189774719	0.0	Two	Core
Chr2	826989	827224	Unsp	0.258257142857143	0.47234042553191496	0.25925925925925897	5.32430477172126	0.0	7.5943182551677095	9.85929085237646	-5.76719552496763	0.0	Three	Core
Chr2	907953	908137	Unsp	0.244245882352941	0.5	0.8585858585858589	5.10471848180467	0.9689509742448209	8.263612945429442	9.485341084422519	-6.28758609874575	0.0	Three	Core
Chr2	973009	973176	Unsp	0.239812349726776	0.562874251497006	0.47402597402597396	5.03065184543009	0.0	7.613108397967809	9.68568271912032	-6.643856189774719	0.0	Three	Core
Chr2	975596	975764	Unsp	0.15580954545454503	0.547619047619048	0.331521739130435	6.03156774904659	0.0	5.42929713812333	9.98174676015476	-6.417974782358401	0.0	Three	Core
Chr2	990336	990468	Unsp	0.0602284444444444	0.5	0.31547619047619	5.03065184543009	1.2249417298046898	8.78460233476707	9.945041731727631	-6.18491586861907	0.0	Three	Core
Chr2	1001759	1001954	Unsp	0.255227429906542	0.538461538461538	0.0765550239234449	5.03065184543009	0.9283743134756529	9.65349362515089	9.44848595067064	-5.98952322523995	0.0	Three	Core
Chr2	1002017	1002223	Unsp	0.229392286995516	0.519417475728155	1.30434782608696	5.03065184543009	0.0	9.72778770980547	9.528825950521721	-6.238790600778461	0.0	Three	Core
Chr2	1034959	1035469	LTR	0.31645999999999996	0.44811320754717	-0.328054298642534	5.19799905294362	0.0	9.40223805284324	9.292740942614609	-5.7828326029235395	0.0	Three	Core
Chr2	1035083	1035381	Unsp	0.4658152	0.553691275167785	-1.1741176470588202	5.03065184543009	0.0	9.44829365239123	9.526251742973711	-6.19709560083161	0.0	Three	Core
Chr2	1048248	1048516	LTR	0.30107136029411796	0.451492537313433	-0.564102564102564	5.17425132346575	1.20939972232964	9.18362019041126	9.48091955927833	-6.02584372298667	3.5	Three	Core
Chr2	1069539	1071396	DNA	0.000538213132400431	0.510500807754443	-0.40021208907741296	5.03065184543009	8.22183010944333	8.28289682870018	8.57131152483785	-6.290353213767389	29.42105263157895	Two	Core
Chr2	1086055	1086241	Unsp	0.29743529411764696	0.521505376344086	0.222222222222222	5.03065184543009	8.52907443478617	10.4552987230096	9.24325690117343	-5.874740072004809	0.0	Two	Core
Chr2	1133583	1133789	Unsp	0.19675119266055	0.470873786407767	-0.440476190476191	5.697146824163481	0.8911622131218191	6.91897277211478	9.84049521302839	-6.643856189774719	0.0	Three	Core
Chr2	1138715	1138973	LTR	0.323692377358491	0.47674418604651203	-0.5511921458625529	5.34801157379668	0.749954984086342	8.23116979566677	9.40399813448538	-6.643856189774719	0.0	Three	Core
Chr2	1145156	1145356	Unsp	0.199025833333333	0.57	0.280701754385965	5.03065184543009	5.5748052131679104	9.25339187887986	9.461651831557079	-6.311884798918459	0.0	Two	Core
Chr2	1246994	1247436	Unsp	0.327594660633484	0.538461538461538	-0.8636363636363641	8.06770435373924	6.172245002938559	7.49755244574586	9.06992511868596	-5.91566080523625	0.0	Two	Core
Chr2	1321378	1321521	LTR	0.24632418300653602	0.566433566433566	-0.0657894736842106	5.54606590939955	7.83307438999297	9.06169739601065	10.1707101040996	-6.643856189774719	0.0	Two	LS
Chr2	1326231	1326359	Unsp	0.0621019847328244	0.515625	0.282894736842105	5.03065184543009	8.8809255294592	9.371559872754089	9.97636954620019	-6.240500495543519	0.0	Two	LS
Chr2	1330674	1331361	Unsp	0.12304580736543902	0.30567685589519605	1.3918495297805602	5.03065184543009	8.70320459279004	8.99723679700881	7.15741916871058	-4.76538027868177	10.25	One	Core
Chr2	1347177	1347300	Unsp	0.34838682170542606	0.447154471544715	0.509803921568627	5.345697586001401	7.8858459942250505	8.80581254670361	9.769710013378289	-6.643856189774719	0.0	Two	Core
Chr2	1366733	1366933	Unsp	0.20224880733945	0.565	1.04166666666667	5.100184687091179	1.46512666678994	9.867877993308221	9.71547335195274	-6.27140459887605	0.0	Three	Core
Chr2	1381663	1381813	DNA	0.28496135135135103	0.46	-0.277777777777778	5.100184687091179	0.0	8.77271340454509	9.64415878323507	-5.772110680447169	0.0	Three	Core
Chr2	1394947	1400474	LTR	0.0009038322487346349	0.5348290211688079	-0.703106978085352	17.1451216507257	5.8010612528607	6.810813166193451	9.168797402148279	-6.29404033938462	27.571428571428573	Two	Core
Chr2	1428579	1428711	DNA	0.19904285714285697	0.38636363636363596	0.0625	5.03065184543009	8.29446296288427	10.5946334069514	8.86915660212234	-6.2660092498043	15.333333333333334	Two	LS
Chr2	1435434	1435901	LTR	0.193644480651731	0.334763948497854	0.8540510543840178	5.03065184543009	8.48151789800187	10.501649219850199	8.19969850620486	-5.9826581032264805	0.5	One	Core
Chr2	1480631	1480950	DNA	0.17685012383900894	0.366771159874608	1.57662835249042	5.03065184543009	9.417108192260859	8.951363515534881	9.05385764002636	-4.45121111183233	0.5	One	Core
Chr2	1481008	1481232	Unsp	0.21584454935622302	0.45982142857142894	0.0416666666666667	5.03065184543009	8.90532936771767	8.69046168100005	9.85573030446666	-4.487097327819559	0.0	Two	Core
Chr2	1481679	1481991	LINE	0.0577789665653495	0.5	0.6195426195426199	5.1352948761526696	5.47181475422361	9.39894429647342	9.38476061931796	-6.20101199495786	31.75	Two	Core
Chr2	1483444	1483576	LTR	0.25611583333333304	0.545454545454545	-0.1125	5.03065184543009	1.2249417298046898	7.897444117181069	10.5602392312782	-6.643856189774719	7.5	Three	Core
Chr2	1489343	1495216	LTR	0.00365665896843726	0.533127293799498	-0.797188626658825	5.17425132346575	5.889306260513201	7.042296676277241	9.32917655392803	-6.28381585843042	16.016666666666666	Two	Core
Chr2	1565475	1567337	DNA	0.0032113290460878898	0.5477980665950589	-0.6201485148514849	7.54902188582744	7.06640661756888	7.69704248259305	9.0173978641578	-6.253886105134139	28.85	Two	Core
Chr2	1574888	1575006	Unsp	0.198147826086957	0.576271186440678	-0.166666666666667	5.100184687091179	0.0	7.5943182551677095	10.6968998264858	-6.27092052337571	0.0	Three	Core
Chr2	1708399	1708516	Unsp	0.076792	0.47008547008547	1.1	5.70519198501876	8.58170186018075	8.56303866220467	9.8261622220438	-6.643856189774719	0.6666666666666666	Two	Core
Chr2	1897645	1897886	Unsp	0.22489180327868902	0.42323651452282207	-0.5580952380952379	5.431964972886809	0.0	7.02089115923285	9.64945234297974	-6.215155527289209	0.0	Three	Core
Chr2	2140530	2140669	Unsp	0.31066652482269497	0.561151079136691	-0.631944444444444	5.2329307917979	7.29611782569662	8.47685005319558	9.61348579027777	-6.14076581404821	0.0	Two	Core
Chr2	2140940	2141068	Unsp	0.33980358778626	0.5390625	-1.37142857142857	5.1352948761526696	0.0	8.07379077221599	9.4662398485479	-6.07182220363768	0.0	Three	Core
Chr2	2192724	2192945	Unsp	0.184118222222222	0.5339366515837101	1.06818181818182	5.91848554724651	7.15743395274476	9.07084107679623	9.445871937705641	-6.302413821212371	0.0	Two	LS
Chr2	2208190	2208986	Unsp	0.30980793931732	0.631909547738693	-0.918875502008032	6.84655030836915	5.392038813851871	6.398017244844099	9.62177760672464	-6.31512826278202	0.0	Two	Core
Chr2	2209130	2209882	Unsp	0.310791293333333	0.615691489361702	-0.574418604651163	6.299818651086531	4.83436932662205	5.9394581248604705	9.55058453399452	-6.24988585766291	0.0	Two	Core
Chr2	2293579	2293699	Unsp	0.246323553719008	0.558333333333333	-1.2	5.09975004453444	1.30587132913689	6.7849759819848	10.536519912902401	-6.26299953749284	0.0	Three	Core
Chr2	2331434	2331616	LTR	0.24865445026177999	0.46153846153846206	0.0140350877192983	5.95685749492198	7.172561561425081	8.6013166353427	9.42036789377952	-6.643856189774719	0.0	Two	Core
Chr2	2331837	2332061	Unsp	0.171313021276596	0.46875	0.0476190476190474	5.66361590492435	2.05058225705223	7.3586025907773305	9.50974203746442	-5.574222001937669	0.0	Three	Core
Chr2	2348548	2348732	Unsp	0.252022335025381	0.38043478260869606	0.45959595959595895	5.48354145000942	0.9689509742448209	8.35952536502138	9.35283245892885	-6.643856189774719	0.0	Three	Core
Chr2	2375717	2376039	Unsp	0.38578501547987604	0.577639751552795	-0.230263157894737	5.09975004453444	5.78230076202499	6.987671496895111	9.618724016868759	-5.40057370149951	0.0	Two	Core
Chr2	2376029	2376347	Unsp	0.42882260869565203	0.518867924528302	-0.466266866566717	5.8484923686643695	5.24911116964209	6.29661277064674	9.50377362785071	-6.323602448931919	0.0	Two	Core
Chr2	2448133	2448388	DNA	0.19063385826771698	0.458823529411765	-0.15151515151515196	5.21966174099868	6.54584766267756	6.93159159325567	9.8934649773046	-6.1551090043128704	0.0	Two	Core
Chr2	2540843	2541044	Unsp	0.180024516129032	0.572139303482587	0.45454545454545503	5.03065184543009	7.379992324534639	10.1229753113626	9.60908235547796	-6.10260383976465	0.0	Two	Core
Chr2	2551447	2551638	Unsp	0.21866304761904803	0.534031413612565	-0.0606060606060606	6.068710523983799	1.50806707922524	9.039833272737608	9.928516240084289	-6.209301244119481	0.0	Three	Core
Chr2	2552076	2552224	Unsp	0.328186357615894	0.432432432432432	-0.715151515151515	5.2023543974499	6.642796205831241	10.2920998929266	9.31793742733103	-6.643856189774719	0.0	Two	Core
Chr2	2559882	2560073	Unsp	0.18458028846153798	0.570680628272251	0.154761904761905	5.03065184543009	0.942716070870955	9.60172751985332	9.461501465254551	-6.39009959752894	0.0	Three	LS
Chr2	2668284	2668925	Unsp	0.10607904191616802	0.252730109204368	1.33406593406593	5.03065184543009	8.48706060397807	8.43062801711962	7.04285843573571	-4.46893050727405	4.0	One	Core
Chr2	2669005	2670035	LTR	0.0387455938697318	0.20291262135922303	1.27556473160068	5.03065184543009	8.82898725769887	8.89821262616906	5.80152575926344	-3.52411694550063	11.272727272727273	One	Core
Chr2	2670039	2674282	LTR	0.0792991157894737	0.21570014144271601	1.26845479769873	5.03065184543009	8.10027217786226	8.9085237690234	5.668808886120981	-4.1725504708491306	22.511627906976745	One	Core
Chr2	2674282	2681152	LTR	0.0704314256707759	0.5186317321688501	-0.358459638265303	5.836074474642	6.937416733104019	7.67115071035707	9.025140850410132	-6.2423875368838	22.814285714285713	Two	Core
Chr2	2681830	2682078	Unsp	0.21904569169960503	0.45161290322580605	-0.52125	5.03065184543009	0.773440383055268	8.95054173453755	9.07503199423514	-3.66518625263911	16.666666666666668	Three	LS
Chr2	2691290	2691469	Unsp	0.324455	0.5027932960893851	-0.4	6.95858988667541	8.82272544902966	10.508954339614	9.498816541303869	-5.996244892811201	0.0	Two	Core
Chr2	2871576	2872068	LTR	0.15818939096267198	0.283095723014257	1.48590381426202	5.03065184543009	7.30711326768485	9.443762247547788	7.2495318956188	-3.09002858780653	7.0	One	Core
Chr2	2872068	2872530	LTR	0.14628665158371	0.266514806378132	1.51167964404894	5.03065184543009	8.13105170765818	8.98320540728869	6.86262140325445	-5.87891502294733	13.0	One	Core
Chr2	2872520	2873165	Unsp	0.122041741071429	0.24961240310077498	1.40225563909774	5.03065184543009	9.20858648394135	9.25727951068594	6.20413249804857	-5.002937283079549	12.714285714285714	One	Core
Chr2	2873202	2875615	LTR	0.0675118850102669	0.17861583091587196	1.27501428027418	5.03065184543009	7.958273267053679	9.162914893353038	4.9364446156971695	-4.01503939946414	25.68	One	Core
Chr2	2875702	2876336	Unsp	0.11705444108761301	0.255520504731861	1.4367816091954	5.03065184543009	8.32504002202958	9.36460654804584	6.38836263064647	-4.34473797779545	23.857142857142858	One	Core
Chr2	2876336	2876679	LTR	0.0943511271676301	0.17201166180757999	1.18311688311688	5.03065184543009	7.16410186534505	8.83529789663254	6.56996754887197	-3.9311381418551896	25.25	One	Core
Chr2	2892809	2893020	Unsp	0.136805806451613	0.52132701421801	0.185185185185185	5.09975004453444	6.89043657306543	9.793066576036331	9.57498778906948	-6.249380012978199	26.666666666666668	Two	LS
Chr2	2893746	2894076	LTR	0.25469288888888897	0.478787878787879	-0.14957264957264998	5.17425132346575	0.0	8.13656364024462	8.68366450802718	-6.643856189774719	35.0	Three	LS
Chr2	2901553	2901720	Unsp	0.18645981707317102	0.497005988023952	0.69047619047619	5.03065184543009	8.054858447587879	9.94780636456512	9.563353930243188	-5.80095715085945	23.333333333333332	Two	LS
Chr2	2911519	2911716	Unsp	0.16686018957346	0.568527918781726	-0.471590909090909	5.03065184543009	8.12877474070656	9.84405883943575	9.830152064308919	-5.8991132450168005	31.666666666666668	Two	LS
Chr2	2942362	2942542	LINE	0.344178010471204	0.538888888888889	-1.6019736842105299	5.387875344182	0.0	9.25419630884579	9.94801156114737	-5.03579586128599	32.0	Three	LS
Chr2	2945756	2947618	DNA	0.0032113290460878898	0.5472610096670251	-0.621095674450685	6.16371217110353	6.820622438245059	8.041173295184329	9.0304021883371	-6.32634894502813	29.95	Two	LS
Chr2	2947632	2949489	DNA	0.000538213132400431	0.510500807754443	-0.40021208907741296	5.03065184543009	8.05210998248337	8.35684123308637	8.6128842686484	-6.1919504433009696	32.0	Two	LS
Chr2	2949489	2949598	LTR	0.34860631578947404	0.45871559633027503	0.133333333333333	5.03065184543009	5.63426468827734	10.2465305091619	9.331269507140538	-6.056479136120269	33.5	Two	LS
Chr2	2949796	2950008	Unsp	0.115152844036697	0.5	0.0290909090909091	5.03065184543009	1.80368112159707	10.5540424816626	9.3484483848201	-6.393193708609901	35.0	Three	LS
Chr2	2975373	2981246	LTR	0.00365665896843726	0.533127293799498	-0.797188626658825	5.27188723911098	5.645392185412541	6.9943402364680995	9.334473189446731	-6.2511452818710005	16.516666666666666	Two	LS
Chr2	2981248	2986776	LTR	0.000723065798987708	0.5347322720694639	-0.703106978085352	17.1446508566856	5.76172186719814	6.7415018207528306	9.17894186110876	-6.24224707504606	27.892857142857142	Two	LS
Chr2	2986826	2987031	LTR	0.25621149758454104	0.463414634146341	0.0625	5.10471848180467	1.44239594802731	7.8135678186080195	9.947582842127321	-6.643856189774719	24.0	Three	LS
Chr2	3003720	3004283	LTR	0.0603686933797909	0.206039076376554	1.39802802283342	5.03065184543009	8.39958660868142	8.77727481957865	6.711780046091031	-6.643856189774719	17.833333333333332	One	Core
Chr2	3004279	3005019	Unsp	0.133550128865979	0.28918918918918896	1.4563796002241698	5.03065184543009	8.37182956006285	9.28488261599122	6.91616895596786	-4.50869660649309	18.77777777777778	One	Core
Chr2	3004911	3006782	LTR	0.0634348588709677	0.185975609756098	1.23076923076923	5.03065184543009	8.08178502182214	8.91470434170703	5.2044295414268795	-6.10735517801021	26.473684210526315	One	Core
Chr2	3005600	3006487	Unsp	0.272999743918054	0.19842164599774498	1.2992125984252	5.03065184543009	7.65477479718482	9.126512579456131	5.35301261511283	-6.643856189774719	23.0	One	Core
Chr2	3006782	3007416	Unsp	0.120599243570348	0.26813880126183	1.21855921855922	5.03065184543009	8.70586406674933	9.278874274678989	6.57071906976848	-3.9128689976274504	18.625	One	Core
Chr2	3007453	3017042	LTR	0.0828445476536043	0.16634429400386802	1.18481648199446	5.03065184543009	8.950563642715212	8.86802925638615	5.50655759945647	-3.4610355043398897	27.422680412371133	One	Core
Chr2	3008327	3015842	LTR	0.0828443708609272	0.22478347768154602	1.29485428051002	5.03065184543009	9.040112350701929	8.961736256734518	5.728783159725009	-4.64252344599321	25.44736842105263	One	Core
Chr2	3017422	3018050	Unsp	0.10158079389313002	0.286624203821656	1.3722473604826497	5.03065184543009	9.235794620390081	9.33327785758405	6.23009565809729	-4.62055324542984	10.142857142857142	One	Core
Chr2	3018150	3018587	Unsp	0.140945054704595	0.18764302059496601	1.22972972972973	5.03065184543009	8.80948716559179	8.209595379273031	5.7975842371496	-4.56462949862415	31.8	One	Core
Chr2	3018587	3019063	LTR	0.0537840637450199	0.5210084033613449	-0.37866224433388596	5.56479235781017	8.6227912943495	7.7169461414628495	9.295886986784849	-6.273232618522849	21.833333333333332	Two	Core
Chr2	3019063	3025046	LTR	0.0793429033333333	0.521644659869631	-0.38430216103203707	6.63806959206941	6.62252971066082	7.72196819101962	9.077117970967901	-6.29914589863596	18.721311475409838	Two	Core
Chr2	3025046	3025522	LTR	0.0537840637450199	0.5210084033613449	-0.37866224433388596	5.56479235781017	8.19904795456936	8.04054602100971	9.501136272703869	-6.27711646864106	15.5	Two	Core
Chr2	3025522	3025733	Unsp	0.102569045454545	0.322274881516588	1.875	5.03065184543009	6.9005467012885795	9.69014392985228	8.40653266748294	-5.2288186904958796	12.0	One	Core
Chr2	3025816	3026101	LTR	0.125357542662116	0.235087719298246	1.4523809523809499	5.03065184543009	9.09697160738753	9.69828217779791	6.2568353009108195	-4.61637545335262	24.75	One	Core
Chr2	3026312	3026933	Unsp	0.17944471669218998	0.22866344605475	1.13591836734694	5.03065184543009	7.667722838542041	9.02932747869975	5.90443131100008	-4.55270830171653	24.714285714285715	One	Core
Chr2	3026944	3027350	LTR	0.3019517216981131	0.19950738916256197	1.19333333333333	5.03065184543009	8.065662278050999	9.333904552821268	6.05882106402732	-6.643856189774719	21.2	One	Core
Chr2	3028870	3029490	Unsp	0.18302177914110396	0.291935483870968	1.44879089615932	5.03065184543009	8.59753770375512	9.07330379966211	6.61213718325189	-5.21973939658502	20.714285714285715	One	Core
Chr2	3029492	3030088	LTR	0.17818222222222196	0.22818791946308703	1.29613402061856	5.03065184543009	8.71635324176771	9.000661501771589	5.8505708959978	-4.91024960769843	20.714285714285715	One	Core
Chr2	3030223	3030376	Unsp	0.26009083333333305	0.261437908496732	1.65	5.03065184543009	8.71226088711756	9.67047372006185	6.9812037733371	-6.643856189774719	15.5	One	LS
Chr2	3030390	3030941	Unsp	0.18118013544018105	0.37568058076224997	1.6266666666666698	5.03065184543009	9.30320121711004	9.36312999289401	8.00671220316303	-4.17721365624233	9.857142857142858	One	LS
Chr2	3032059	3032662	Unsp	0.22683980922098604	0.27694859038142605	1.41820768136558	5.03065184543009	8.454638419639831	9.22458245904069	6.787245749053559	-3.15598682304448	13.142857142857142	One	LS
Chr2	3032744	3033379	Unsp	0.150615335365854	0.256692913385827	1.33617963314358	5.03065184543009	8.846422152838722	9.157013056949289	6.78049230973477	-4.012797274464121	8.0	One	LS
Chr2	3033462	3033730	LTR	0.286653977695167	0.223880597014925	1.54545454545455	5.03065184543009	8.42157614956707	9.11677962605206	6.02066771106902	-6.643856189774719	10.25	One	LS
Chr2	3119906	3120833	Unsp	0.157472794612795	0.238403451995685	1.3222177581358001	5.03065184543009	7.35341404989887	9.10330578709292	6.6316631587186805	-3.64805617830401	26.2	One	LS
Chr2	3120942	3121590	LTR	0.10081991071428599	0.247295208655332	1.5128205128205099	5.03065184543009	8.22472641265537	9.58701968160025	6.96488927018071	-3.18442457113743	10.571428571428571	One	LS
Chr2	3141624	3141845	LTR	0.41896112612612607	0.48416289592760203	-0.1	5.4455745535237	1.3745072392866697	9.36627635020838	9.317132645837962	-6.278051366790709	23.0	Three	LS
Chr2	3171116	3171781	DNA	0.0914597590361446	0.5293233082706771	-0.399303135888502	5.10471848180467	6.67701044307125	9.17609023712	9.151987014103	-6.01950609620342	23.0	Two	LS
Chr2	3172196	3172336	Unsp	0.23228275862069	0.535714285714286	-0.9047619047619051	5.03065184543009	6.989234357438401	10.119274079817199	9.67035316858482	-5.990277076979179	23.0	Two	LS
Chr2	3174783	3175794	DNA	0.288600199600798	0.508407517309594	-0.406837606837607	9.081930591218539	5.5049054622022595	8.45415778526534	8.825673099089869	-6.291722849859361	23.0	Two	LS
Chr2	3179335	3181031	DNA	0.271585571260306	0.505896226415094	-0.29177202878817404	5.10471848180467	5.9123950408002495	9.37119712429822	8.69945799207705	-6.26129108294328	23.0	Two	LS
Chr2	3205158	3205336	DNA	0.13804488888888902	0.44943820224719105	-0.0928571428571429	5.24256142224091	6.629317088097169	9.35374308045642	9.47546603255614	-6.45887911895682	24.333333333333332	Two	LS
Chr2	3207709	3207915	Unsp	0.14978093896713598	0.519417475728155	0.153846153846154	5.09975004453444	7.70518113586481	9.53288365013468	9.8465759172695	-6.045987704856629	21.666666666666668	Two	LS
Chr2	3215508	3215609	Unsp	0.12752230769230802	0.514851485148515	-0.43181818181818205	5.03065184543009	0.0	8.79387605604678	8.402509063542361	-6.643856189774719	25.5	Three	LS
Chr2	3219273	3224795	LINE	0.00917840287769784	0.563382832307135	-0.7370052484591679	12.267970282618	5.614205235130401	7.0437860788350095	9.36373812128749	-6.1870113114546506	17.553571428571427	Two	LS
Chr2	3231036	3231233	Unsp	0.16686018957346	0.568527918781726	-0.471590909090909	5.03065184543009	8.08194792319011	9.80410489903194	9.91430828986233	-5.82553014989612	32.0	Two	LS
Chr2	3255348	3256115	LINE	0.0478311683417085	0.526727509778357	-0.31904318111214697	7.14327780248895	5.675022571684081	7.92088206318816	9.47454612083542	-6.41304986553949	22.666666666666668	Two	LS
Chr2	3260262	3260752	LTR	0.0676945945945946	0.508163265306122	-0.231237322515213	5.6589031614711	8.35652651424994	8.45982549910051	9.51316685606367	-6.15391202111264	13.666666666666666	Two	LS
Chr2	3306259	3306483	LTR	0.133092433628319	0.4508928571428571	-0.791666666666667	5.32244454412134	0.8364758545889179	7.076418532156731	9.57516413319132	-5.3896307714493	15.0	Three	LS
Chr2	3306771	3312299	LTR	0.00090293564714389	0.534913169319826	-0.699608923559518	17.1443647982845	5.73363386582604	6.81014574019524	9.173928099257221	-6.287109307159281	28.0	Two	LS
Chr2	3340756	3340969	LTR	0.0318181818181818	0.455399061032864	-0.6339522546419101	5.24837790774677	5.25513142634438	8.851345719918118	9.67473462688773	-6.18491586861907	17.333333333333332	Two	LS
Chr2	3340971	3346499	LTR	0.000723065798987708	0.5347322720694639	-0.703106978085352	17.1446171587255	5.8260154471001195	6.808100496516711	9.13207059589326	-6.24612148061139	27.946428571428573	Two	LS
Chr2	3373216	3373343	LINE	0.36609940298507504	0.5354330708661421	-2.46212121212121	5.34105995147432	1.9187937180473	9.17241869618673	10.1364871096156	-6.643856189774719	20.0	Three	LS
Chr2	3376999	3382485	LINE	0.00960075294117647	0.5641633248268321	-0.733907396950875	12.2659053389672	5.664915902924481	7.04582536962256	9.366059849004051	-6.28564046331825	18.017857142857142	Two	LS
Chr2	3422833	3422999	Unsp	0.204754424242424	0.487951807228916	0.7380952380952379	5.03065184543009	7.25593783487686	9.79985449571686	8.846947642377241	-6.00064854801762	20.0	Two	LS
Chr2	3430514	3430720	Unsp	0.140251226415094	0.519417475728155	0.12	5.09975004453444	7.675331625147471	9.49053143488622	9.80346274054417	-5.862798011425349	22.0	Two	LS
Chr2	3437759	3439101	LTR	0.340504422700587	0.37257824143070006	1.47950819672131	5.03065184543009	8.837233990501801	10.06097765679	8.411503893804849	-4.695270086151259	14.333333333333334	One	LS
Chr2	3439101	3439534	LTR	0.0605426879271071	0.533487297921478	-0.16998577524893302	5.03065184543009	7.560562234794941	8.38435423929356	9.4797518724592	-6.26299953749284	9.8	Two	LS
Chr2	3439534	3450407	LTR	0.180350465049929	0.38231098430813104	1.5668195983379498	5.2023543974499	8.1722652737453	8.544777638947071	8.856164655653618	-4.2351062624108895	16.51818181818182	One	LS
Chr2	3440257	3440733	LTR	0.051792828685259	0.51890756302521	-0.37866224433388596	5.03065184543009	7.794062235608269	8.24437196965016	9.37608877804035	-6.26380683270808	14.666666666666666	Two	LS
Chr2	3440733	3446716	LTR	0.0791642833333333	0.521477519638977	-0.38430216103203707	5.03065184543009	6.6928344429883095	7.738930607597669	9.04467663912228	-6.25260925383063	18.59016393442623	Two	LS
Chr2	3446716	3447192	LTR	0.051792828685259	0.51890756302521	-0.37866224433388596	5.03065184543009	8.51636521248676	8.41669973643623	9.49947168210773	-6.11185760044229	14.6	Two	LS
Chr2	3448107	3448540	LTR	0.0629733029612756	0.526558891454965	0.0284495021337126	5.03065184543009	8.740327721775731	8.41734313720289	9.60588780056391	-6.05322811919951	3.8	Two	LS
Chr2	3450407	3450866	LTR	0.200051900826446	0.389978213507625	1.21688675470188	5.100184687091179	9.054183577868221	9.77761740898406	8.37904124014398	-4.853204400961969	12.0	One	LS
Chr2	3450866	3451319	LTR	0.129327260869565	0.485651214128035	-0.0298507462686568	5.173816680909019	9.06066005586565	9.05125213670666	9.12345355636427	-5.131957151243291	14.166666666666666	Two	LS
Chr2	3464098	3464461	LTR	0.139657674418605	0.484848484848485	-0.261632341723875	5.10471848180467	9.78759624450685	9.10971314994532	9.06333583058881	-5.651015981347589	19.6	Two	LS
Chr2	3464461	3465751	LTR	0.0978879350348028	0.358139534883721	1.45787545787546	5.03065184543009	8.910968862725472	9.61609646957871	8.20492247415068	-4.1584460536057595	14.857142857142858	One	LS
Chr2	3465751	3466204	LTR	0.0989173626373626	0.507726269315673	-0.158862876254181	5.10471848180467	8.75243298044418	7.52750282522578	11.327308006388302	-5.611706964135849	24.0	Two	LS
Chr2	3475719	3476384	DNA	0.0931392771084337	0.52781954887218	-0.435185185185185	5.10471848180467	7.97691874693709	9.35582526833457	9.101072494969651	-6.3305520013975505	24.857142857142858	Two	LS
Chr2	3476800	3476940	Unsp	0.23892589041095896	0.5142857142857139	-0.628571428571429	5.100184687091179	8.25756283981036	9.81761494638866	9.753840128699789	-6.07638111578241	27.5	Two	LS
Chr2	3479386	3481245	DNA	0.28381877373847	0.513717052178591	-0.35398860398860404	9.31119193590607	5.34695042537175	8.727130923910611	8.76091764873023	-6.23909564774763	24.25	Two	LS
Chr2	3484270	3484446	Unsp	0.30035455056179805	0.477272727272727	0.7165775401069521	5.03065184543009	1.0008541161361602	10.9521592264679	9.28709234615411	-6.643856189774719	28.0	Three	LS
Chr2	3492697	3492937	DNA	0.35403094017094	0.4958333333333329	0.187683284457478	5.60011160503277	0.0	8.76666187374122	9.16480601275484	-5.450318631110459	28.0	Three	LS
Chr2	3498712	3499110	LINE	0.337731447028424	0.49612403100775204	0.241687979539642	5.12828776107532	0.5273988231851029	9.14303851428609	9.00252488022193	-6.012801423328661	28.0	Three	LS
Chr2	3500106	3508438	LINE	0.304502752688172	0.5605413105413111	-0.36712852365026294	12.226344104022601	6.088885683422309	7.73447874009792	9.47860152291619	-6.29285871732545	29.416666666666668	Two	LS
Chr2	3506029	3506188	LTR	0.239454649681529	0.45911949685534603	-0.22727272727272702	5.03065184543009	0.0	7.6917934939668	10.2279726557642	-6.33573389441239	28.0	Three	LS
Chr2	3508484	3508729	LINE	0.330888671875	0.5265306122448979	0.0666666666666667	7.796105885529361	0.0	8.01986999981884	9.53363774814962	-6.07788444197849	34.0	Three	LS
Chr2	3510927	3511140	LTR	0.0363783181818182	0.460093896713615	-0.7527472527472528	5.2023543974499	8.88287579886061	7.67885002336098	9.98569245007207	-5.924408356866549	28.666666666666668	Two	LS
Chr2	3511622	3512104	LINE	0.30006844444444397	0.5	0.10060606060606099	6.78641035285283	6.86831015916749	8.56930823549785	9.764760484068132	-6.42983746103976	34.0	Two	LS
Chr2	3515413	3515647	LTR	0.21045743589743598	0.45726495726495703	-0.20535714285714302	5.41126783243577	0.0	8.10605226719032	9.11541772592256	-6.27428272265225	34.0	Three	LS
Chr2	3519307	3519445	LTR	0.20309405594405602	0.471014492753623	0.300751879699248	5.35315680208378	0.0	8.36916041426656	10.031906163073302	-6.0552642656528795	34.0	Three	LS
Chr2	3524667	3530540	LTR	0.0141182640492687	0.522696542399073	-0.598558043319542	6.3539042479986	5.88639835439649	7.83529680274526	9.290767121534019	-6.29439438788936	23.8	Two	LS
Chr2	3543299	3544999	DNA	0.28335468473777303	0.508235294117647	-0.301867064973861	5.2023543974499	6.82402667226062	9.31957469838262	8.60638048726969	-6.31905515326576	33.0	Two	LS
Chr2	3551278	3551610	LINE	0.35744269113149896	0.46084337349397597	0.47619047619047605	5.2888344533620195	6.604924302393969	10.213785186088801	8.54201723099661	-6.40875271668872	33.0	Two	LS
Chr2	3555512	3561034	LINE	0.0093571726618705	0.563382832307135	-0.735464416409861	12.2676425508254	5.606708319272139	6.97536899662767	9.34997608364052	-6.263273226514531	17.589285714285715	Two	LS
Chr2	3561962	3567835	LTR	0.0104218302540416	0.526366621595519	-0.6555820364274471	5.77785082280676	6.12774064767423	7.7045907783374705	9.32431683956095	-6.31493220864528	22.366666666666667	Two	LS
Chr2	3582575	3584030	LINE	0.315273176470588	0.564036222509702	-0.45136866627839295	10.249390548517301	5.167721369726861	6.91178557176538	8.96425533607218	-5.83422438583146	33.0	Two	LS
Chr2	3606169	3612042	LTR	0.00365665896843726	0.533127293799498	-0.797188626658825	5.518625730450691	5.79088621624408	6.9742215670490895	9.328873300897131	-6.316180449592331	16.483333333333334	Two	LS
Chr2	3612146	3612686	LINE	0.317143747454175	0.559259259259259	-0.197435897435898	7.576062496953269	5.33386179132449	6.52295199500106	9.53778521594335	-6.28967389588274	18.333333333333332	Two	Core
Chr2	3613384	3613824	LINE	0.351922972972973	0.5840909090909089	-0.0307692307692308	6.19820644131811	6.38568673206646	6.67629021578228	9.330575596727881	-6.38043650017822	22.166666666666668	Two	Core
Chr2	3620789	3627343	LTR	0.0799396700623385	0.166768385718645	1.15990338164251	5.09975004453444	8.57065359206316	8.44362677255096	4.29688213146016	-4.53111497742454	32.32835820895522	One	Core
Chr2	3627353	3633889	LTR	0.0918800266889074	0.185339789614293	1.19665365586853	5.03065184543009	9.04121093891548	8.662157681304441	4.9515701466772	-5.2770738591030995	28.272727272727273	One	Core
Chr2	3629960	3630430	LTR	0.32696966527196697	0.29148936170212797	1.3643892339544499	5.03065184543009	9.36955993728902	9.519411839092589	6.51657168934577	-4.178505139369141	10.833333333333334	One	Core
Chr2	3633903	3634434	LTR	0.253580684931507	0.19962335216572502	1.3033707865168502	5.03065184543009	9.54327696534456	8.61071719352009	5.4242072241655395	-4.63296787363199	33.5	One	Core
Chr2	3634368	3635004	Unsp	0.134508962406015	0.227987421383648	1.3	5.03065184543009	9.15606438989943	8.47818929274146	5.74162754676509	-4.921892758947769	29.625	One	Core
Chr2	3635004	3640178	LTR	0.0736078076202374	0.17373059169114602	1.1953302030871498	5.03065184543009	8.811201216028062	8.3794846544011	4.38355610031409	-4.59635160601254	33.0	One	Core
Chr2	3640216	3640852	Unsp	0.148481536144578	0.212264150943396	1.27166350411132	5.03065184543009	9.212174862737312	8.671727855674911	5.2901782837048	-3.71910892958516	28.857142857142858	One	Core
Chr2	3640845	3641202	Unsp	0.11799104	0.260504201680672	1.44230769230769	5.03065184543009	8.722072847871031	9.31800010951667	5.93562400381287	-4.89842901686032	27.4	One	Core
Chr2	3641170	3645759	LTR	0.0969606645978795	0.23949908687712	1.27961282903143	5.3947793132518695	8.872608908301109	8.72257701884479	6.28533292300346	-4.6541981339961795	25.78723404255319	One	Core
Chr2	3641423	3642083	Unsp	0.132244525547445	0.21363636363636396	1.3039215686274501	5.03065184543009	9.04353394903503	8.70201139561746	5.4908389340252	-4.599462070416269	25.428571428571427	One	Core
Chr2	3649080	3649716	Unsp	0.16375457957957998	0.176100628930818	1.03429203539823	5.03065184543009	8.38622295480304	8.73868123678929	5.17008407521818	-6.643856189774719	33.875	One	Core
Chr2	3649716	3652110	LTR	0.0863713341645885	0.132414369256475	1.06669334400427	5.03065184543009	6.9162654992929395	8.3828540694265	3.51722887344723	-4.83650126771712	36.24	One	Core
Chr2	3652105	3652742	Unsp	0.11684362951807199	0.326530612244898	1.3268493150684901	5.03065184543009	8.03883372751036	8.89721361825619	7.051835191542749	-4.937620305901139	6.571428571428571	One	Core
Chr2	3652746	3661600	LTR	0.0442151974012994	0.211111111111111	1.3641975308642	5.03065184543009	7.50485814209208	8.05974829207774	8.8202915630705	-4.05889368905357	16.46067415730337	One	Core
Chr2	3654489	3661363	LTR	0.0661983796296296	0.519784695955775	-0.31485115471899605	5.03065184543009	6.96600487980487	7.68454992189422	9.14208805224259	-6.23757724842435	17.928571428571427	Two	Core
Chr2	3661694	3664681	LTR	0.0636615320427236	0.16605289588215602	1.19332890806505	5.03065184543009	7.564917328201059	8.49980310560311	4.476920783276549	-3.7108184030109603	29.129032258064516	One	Core
Chr2	3664681	3665329	Unsp	0.14877133928571398	0.183641975308642	1.19090909090909	5.03065184543009	7.0569102654186	8.50077504135306	5.11857852575709	-4.306415095516041	33.0	One	Core
Chr2	3691301	3691521	LTR	0.19347410714285698	0.322727272727273	1.12142857142857	5.03065184543009	7.72389115730411	10.198353546581	7.6068046037342905	-5.2288186904958796	2.0	One	Core
Chr2	3691623	3691781	Unsp	0.131142771084337	0.29746835443038	1.78235294117647	5.10471848180467	8.58412695703011	9.37906480592826	7.75417266052267	-4.78325924644014	3.5	One	Core
Chr2	3692098	3692617	Unsp	0.150938018348624	0.23314065510597304	1.05227743271222	5.03065184543009	8.25302459427173	8.44734383523731	7.21807578560422	-4.82612958364468	4.0	One	Core
Chr2	3787150	3787800	Unsp	0.160949852941176	0.19076923076923102	1.14332514332514	5.03065184543009	8.193930106164581	8.65010055569868	5.1887194048949405	-6.643856189774719	24.857142857142858	One	Core
Chr2	3787973	3788259	Unsp	0.135269466666667	0.23076923076923103	1.3478260869565202	5.03065184543009	7.714377420329599	8.68958276135955	5.553334677720519	-4.410059005166031	27.75	One	Core
Chr2	3788253	3788567	Unsp	0.0990955792682927	0.286624203821656	1.3170731707317098	5.03065184543009	8.902320229635869	8.14096607209183	7.05402322604275	-4.0738131088893095	16.5	One	Core
Chr2	3788891	3789225	Unsp	0.12216662889518401	0.227544910179641	1.27712264150943	5.03065184543009	8.37022868731593	9.0790801246887	6.35847952381387	-6.643856189774719	24.2	One	Core
Chr2	3789229	3794358	LTR	0.0543009071189115	0.19245283018867898	1.24355021071025	5.03065184543009	9.03706224735819	8.17897880549662	4.630088977579639	-4.46656495647252	23.01923076923077	One	Core
Chr2	3794358	3794993	Unsp	0.100330467571644	0.286614173228346	1.4512195121951201	5.03065184543009	8.894967383198411	8.812068361566881	6.1773293453663	-5.532762891305031	9.0	One	Core
Chr2	3794985	3796699	LTR	0.12789708100558697	0.162790697674419	1.26666666666667	5.03065184543009	9.16382266511721	8.72777438235379	7.15323157607466	-6.643856189774719	27.833333333333332	One	Core
Chr2	3796699	3801068	LTR	0.10217945699292699	0.16815783436568	1.12574682598954	5.03065184543009	8.63234392019758	8.44939161483255	4.41649337600052	-5.12978520237937	33.955555555555556	One	Core
Chr2	3801078	3813298	LTR	0.0779205123113582	0.17561654733492402	1.14364606602135	5.03065184543009	7.87658560943483	7.9975589159447	8.35361108963556	-4.603394193430679	23.504065040650406	One	Core
Chr2	3801182	3801511	Unsp	0.17926928571428602	0.364741641337386	0.806698002350176	5.03065184543009	9.458266316153699	9.0565544218336	6.973181490883321	-3.5313686888391205	26.0	One	Core
Chr2	3802895	3809786	LTR	0.0668872616984402	0.519082861703671	-0.31357377222867894	5.03065184543009	7.072316475235	7.71817352656812	9.120426599282599	-6.14249888654909	18.52857142857143	Two	Core
Chr2	3813285	3813922	Unsp	0.111369323308271	0.23861852433281	1.2816020025031298	5.03065184543009	9.09469022503994	8.64875604413526	5.39882277598984	-4.2906489283995	24.75	One	Core
Chr2	3813919	3819015	LTR	0.06114796375682	0.16228414442700198	1.23068451685144	5.03065184543009	8.55486046832244	8.2042080654204	4.33929746671194	-4.263789658835839	31.076923076923077	One	Core
Chr2	3819015	3819650	Unsp	0.12227077039274901	0.19527559055118102	1.1537037037037	5.03065184543009	6.99825918082126	8.53645411971619	5.01358910989215	-6.643856189774719	29.0	One	Core
Chr2	3819733	3820066	Unsp	0.19733645714285697	0.249249249249249	1.4155701754386	5.03065184543009	7.26718459411812	9.13457633608632	6.884636213845741	-3.52411694550063	12.5	One	Core
Chr2	3820140	3820273	Unsp	0.238481205673759	0.24812030075188	1.19323671497585	5.03065184543009	9.72537957937084	8.47215475181661	7.95170156803653	-4.45121111183233	4.5	One	Core
Chr2	3861650	3861883	DNA	0.265555327868852	0.450643776824034	-0.153996101364522	5.09975004453444	1.3279215735924998	9.12144598553283	9.55143451844558	-6.425510601500981	0.0	Three	Core
Chr2	3875805	3876012	Unsp	0.159510844444444	0.570048309178744	-0.4166666666666671	5.471038502010731	6.412807816554491	9.29067240863681	9.81508514346766	-6.2073138506816505	0.0	Two	Core
Chr2	3907477	3907657	Unsp	0.10940212765957401	0.5055555555555561	0.307692307692308	5.03065184543009	0.0	9.766202929648939	9.285628540576289	-6.643856189774719	0.0	Three	Core
Chr2	3908658	3909317	Unsp	0.14699985486211903	0.23975720789074398	1.30909090909091	5.03065184543009	6.39820116104944	9.24102377404952	6.486611731547611	-6.643856189774719	4.5	One	Core
Chr2	3909336	3909665	DNA	0.217398066465257	0.355623100303951	1.4	5.03065184543009	8.46359404583822	9.009339018991302	7.7736137061207105	-4.37796212980169	0.25	One	Core
Chr2	3913310	3913452	DNA	0.28550208333333305	0.35211267605633795	0.53475935828877	5.03065184543009	1.80124538938766	8.12372832620237	8.63633464891148	-6.643856189774719	0.5	Three	Core
Chr2	3913450	3913765	LTR	0.269795131964809	0.20952380952381	1.1306240928882398	5.03065184543009	6.57439605687814	8.90873367555361	5.723207276294151	-6.643856189774719	6.25	One	Core
Chr2	3913765	3914209	Unsp	0.15482535637148997	0.19144144144144098	1.15384615384615	5.03065184543009	7.098585875384329	8.43011220688624	4.17181989334952	-5.4838603055761395	18.833333333333332	One	Core
Chr2	3914293	3914935	Unsp	0.143843725782414	0.213395638629283	1.2293577981651398	5.03065184543009	6.57440923478966	8.57870258252216	5.387793990910731	-3.67128941989784	13.5	One	Core
Chr2	3914920	3915123	Unsp	0.11831134615384599	0.25615763546798004	1.57619047619048	5.03065184543009	0.9010021933394492	9.008804305261211	6.349842456163469	-2.9697677985805897	6.666666666666667	Three	Core
Chr2	3915208	3915423	DNA	0.23762534246575304	0.36744186046511607	1.00966183574879	5.173816680909019	0.862927866343582	9.36537855747785	8.403299628387199	-6.643856189774719	0.0	Three	Core
Chr2	4024801	4024942	Unsp	0.0721608391608392	0.5602836879432621	-0.5619047619047621	5.44745049642087	1.17087398816528	5.4896692742162	9.66507095457242	-6.43561425678131	0.0	Three	Core
Chr2	4093594	4093851	DNA	0.14612738461538502	0.30739299610894893	0.422413793103448	5.29731840517189	0.7522376954605641	8.37444129397159	9.35258941582687	-5.08533124898287	1.5	Three	Core
Chr2	4104457	4104565	Unsp	0.242567118644068	0.49074074074074103	-0.133333333333333	5.27188723911098	0.0	9.52825791178343	9.83533210592935	-5.64023587409603	0.0	Three	Core
Chr2	4110804	4111022	Unsp	0.174109471365639	0.43577981651376096	0.9215686274509799	5.03065184543009	7.49380986748312	8.770416861627039	9.5490374559549	-5.18614377099238	0.3333333333333333	Two	Core
Chr2	4159068	4159281	Unsp	0.19308699999999998	0.6056338028169009	-0.222222222222222	5.10471848180467	7.7540646779682	8.37387814180773	9.8459317738545	-6.260966126010421	0.0	Two	Core
Chr2	4163471	4163661	Unsp	0.24634226600985198	0.447368421052632	-1.22222222222222	5.56054459059001	5.77524313588701	7.75960942289188	9.786342288186571	-5.59588815659112	0.0	Two	Core
Chr2	4167060	4167297	Unsp	0.225023170731707	0.451476793248945	-0.49393939393939396	5.50183205260051	3.84431197451097	6.164662819156491	9.256248322284689	-6.643856189774719	0.0	Two	Core
Chr2	4218179	4218503	DNA	0.102127975460123	0.46913580246913594	0.29	6.64972479959335	6.41071069849524	7.91244321637099	9.69137755398013	-6.20146820235093	0.0	Two	Core
Chr2	4243481	4243595	Unsp	0.24687415254237302	0.5526315789473679	-1.22727272727273	5.03065184543009	8.686095355238509	8.86412021798741	10.6399784145896	-5.991779493195031	0.0	Two	Core
Chr2	4255002	4255645	DNA	0.18024758620689701	0.520338983050847	0.240659340659341	7.59879514019939	6.995818632266491	9.77627098625519	9.275830547581869	-6.37839504654639	2.0	Two	Core
Chr2	4274309	4277494	LTR	0.35107556711082205	0.200586128296972	1.2611247544204298	5.03065184543009	8.2678074301118	9.485589459755891	5.806721448846639	-4.310670724599141	24.4375	One	Core
Chr3	104	393	LTR	0.22265043478260896	0.269896193771626	1.49488372093023	5.03065184543009	9.08816336608065	11.352231030896599	7.9920193963339505	-5.73527921753832	20.5	One	Core
Chr3	2138	3995	DNA	0.000538213132400431	0.510500807754443	-0.40021208907741296	5.03065184543009	7.85738108341709	7.919770512516671	8.537666896967389	-6.3247877490266005	32.0	Two	Core
Chr3	103190	103339	LTR	0.164814074074074	0.5436241610738249	-0.166666666666667	6.858427964578411	6.94174944077137	7.09125397317916	10.155835344989601	-5.6983039737971	0.0	Two	Core
Chr3	127511	128131	Unsp	0.16080556414219502	0.22096774193548396	1.28571428571429	5.100184687091179	8.51845324238007	9.061853915195119	6.1605785646128295	-4.658873225415451	12.428571428571429	One	Core
Chr3	128266	128612	Unsp	0.13778325068870498	0.22832369942196498	1.1842397336293	5.03065184543009	9.295060029139462	8.95742860902931	5.84232888822096	-3.3380477602506398	10.0	One	Core
Chr3	128615	129558	LTR	0.0756191428571429	0.24973204715970002	1.39239028944911	5.03065184543009	8.19664691836199	8.767662100055901	6.31821017574579	-4.7647105846491105	9.5	One	Core
Chr3	129577	130330	Unsp	0.2758975	0.277556440903054	1.46153846153846	5.03065184543009	9.1902443285216	9.104904145833462	7.00230217997823	-4.45922699555478	14.222222222222221	One	Core
Chr3	130366	130999	Unsp	0.11087477272727302	0.309636650868878	1.29654403567447	5.03065184543009	8.839666195372619	8.70665928287512	6.79320205088238	-4.49060992947904	5.0	One	Core
Chr3	131036	132326	Unsp	0.254593781634129	0.24496124031007802	1.3234108527131798	5.03065184543009	9.24834694598046	8.8131212244965	5.96776178369495	-4.93336280696971	28.142857142857142	One	Core
Chr3	132388	132963	Unsp	0.10654533678756499	0.196521739130435	1.31632653061224	5.03065184543009	9.13450218773583	8.30109293591293	5.31193549914094	-4.61077383481889	33.857142857142854	One	Core
Chr3	133024	134937	Unsp	0.24081598774885102	0.205436487192891	1.27798201870928	5.03065184543009	8.71944282443701	8.28971975412734	8.36102770580633	-4.81297428253984	30.8	One	Core
Chr3	134929	135574	Unsp	0.112961661721068	0.30542635658914696	1.4579487179487198	5.03065184543009	9.912218338645962	8.17021729337362	6.81450827601316	-5.243676649223	17.285714285714285	One	Core
Chr3	135657	136321	Unsp	0.23304710144927498	0.16114457831325302	1.04643765903308	5.03065184543009	9.01137050909235	8.709834512682	4.834860102699559	-5.1054362749906	35.5	One	Core
Chr3	136915	140108	Unsp	0.23465258834469896	0.177262762292515	1.21907063197026	5.03065184543009	8.80830299846545	8.44884969934882	5.69304465772233	-4.28981198179363	32.75757575757576	One	Core
Chr3	140203	147686	LTR	0.0880809973404255	0.23712029974575102	1.30138118600683	5.03065184543009	9.41307179702576	8.6495785382759	5.705791023411809	-4.59144143317097	19.586666666666666	One	Core
Chr3	147693	147927	Unsp	0.13045649122807	0.26068376068376103	1.1991869918699198	5.03065184543009	10.0195300436681	8.728274705792039	6.759178744709691	-6.643856189774719	20.0	One	Core
Chr3	147926	148158	LTR	0.0755791452991453	0.21982758620689702	1.01453488372093	5.03065184543009	10.1901827199584	8.991989615469759	6.322655550433769	-4.75527747244315	28.0	One	Core
Chr3	148165	149892	Unsp	0.195113921457029	0.19976838448176001	1.24679897567222	5.03065184543009	8.236362716256219	8.441576045408489	5.45954640043839	-4.9123796131655	29.22222222222222	One	Core
Chr3	149892	156721	LTR	0.0673483076026799	0.520574022550886	-0.341798408272651	9.388694658515579	7.01915859171237	7.67430261836022	9.130753774361189	-6.265362858468441	18.3	Two	Core
Chr3	156721	158006	Unsp	0.252327953125	0.19066147859922197	1.25140901771337	5.09975004453444	7.889144175078489	8.11540552008515	7.24360441710864	-3.7969236101148796	34.285714285714285	One	Core
Chr3	158007	159864	DNA	0.000538213132400431	0.510500807754443	-0.40021208907741296	5.03065184543009	8.358396380464281	8.20078449446092	8.43353836462186	-6.274977042859	32.05263157894737	Two	Core
Chr3	159866	160363	Unsp	0.21830476861167003	0.18712273641851102	1.2435897435897398	5.03065184543009	8.59653204624789	8.558043620920111	4.81804406839273	-6.643856189774719	35.5	One	LS
Chr3	160965	163527	Unsp	0.244538275340393	0.19008587041373898	1.1873353428428999	5.03065184543009	8.27782844384507	8.72542781581255	4.89856917249176	-4.7280499028293095	33.888888888888886	One	LS
Chr3	163592	164182	Unsp	0.10830664406779698	0.19322033898305102	1.25	5.03065184543009	8.01128499862817	8.515231458419569	4.495977468234099	-6.643856189774719	30.285714285714285	One	LS
Chr3	164244	165534	Unsp	0.24692501459854	0.20620155038759697	1.24791666666667	5.03065184543009	8.66987609881208	8.91279287596817	8.39770916040988	-4.49060992947904	31.428571428571427	One	LS
Chr3	165573	166277	Unsp	0.26398580141844	0.285511363636364	1.33004827031376	5.03065184543009	8.905440334362071	9.26132485367799	7.0748082620649	-4.274622380109	21.0	One	LS
Chr3	168502	168886	LTR	0.156386684073107	0.262032085561497	0.915771622385529	5.03065184543009	8.057054549780789	8.59569353873012	7.10640588177524	-4.02839160065622	12.25	One	LS
Chr3	168893	169537	LTR	0.141963856502242	0.23794712286158604	1.42310577644411	5.03065184543009	8.06186775601056	8.77297353849769	6.480152576945669	-4.1725504708491306	15.0	One	LS
Chr3	169623	170246	Unsp	0.14479790123456798	0.23113964686998398	1.3196839080459801	5.03065184543009	8.222745102258429	9.046437189021312	6.003947844301231	-3.84266664052284	16.285714285714285	One	LS
Chr3	214383	214625	LTR	0.31508077551020397	0.39256198347107396	0.107142857142857	5.3676745878781	9.427822076117849	8.73751733766092	8.57535129753289	-5.974856190158559	2.0	Two	Core
Chr3	214637	218432	LTR	0.093096829015544	0.17931392931392898	1.13267813267813	5.03065184543009	8.326347963236099	8.76622978639975	7.62244573512089	-5.8326178332298895	29.871794871794872	One	Core
Chr3	215700	217557	DNA	0.000538213132400431	0.510500807754443	-0.40021208907741296	5.03065184543009	8.12025954297636	8.292077474396	8.48007596439018	-6.27359393617427	32.0	Two	Core
Chr3	218417	219056	Unsp	0.118171684210526	0.245696400625978	1.16	5.03065184543009	9.05931012328057	8.93471355492568	6.40918346178743	-4.921892758947769	18.142857142857142	One	Core
Chr3	219139	219454	Unsp	0.130799246987952	0.20317460317460298	1.17857142857143	5.03065184543009	9.59479327715392	9.217570776717551	6.2874106961321	-6.643856189774719	17.75	One	Core
Chr3	220670	220874	Unsp	0.25252401826484	0.446078431372549	1.56985294117647	5.03065184543009	11.199177920125	10.384464251941301	9.25513376163631	-4.36149517926726	15.333333333333334	One	LS
Chr3	225745	225870	LTR	0.090246062992126	0.32799999999999996	0.47619047619047605	5.03065184543009	10.326395074501999	10.1079360750972	8.60109146367385	-4.49060992947904	0.5	One	LS
Chr3	226009	226656	Unsp	0.13471117384844	0.20556414219474498	1.1257142857142899	5.03065184543009	9.240800903826669	9.33835730107187	5.861502232952451	-4.45121111183233	7.428571428571429	One	LS
Chr3	226716	227374	Unsp	0.129256202898551	0.22796352583586604	1.3162316231623201	5.03065184543009	9.555032290585231	8.79679434958988	5.940495783590991	-4.55749590497154	6.285714285714286	One	LS
Chr3	227478	234954	LTR	0.0816471158455393	0.210286632735066	1.2419695090388798	5.09975004453444	9.14220535706715	8.64974382509029	5.54100410994288	-4.702883765426769	20.394736842105264	One	LS
Chr3	239138	239537	LTR	0.11538944844124699	0.28101265822784804	1.5938914027149298	5.03065184543009	9.394923151733199	9.51690199092824	7.4637076021179904	-6.643856189774719	12.0	One	Core
Chr3	239550	239877	Unsp	0.172140377358491	0.23547400611620803	1.29731638418079	5.03065184543009	9.12358772483101	9.22072068081145	7.036475063317491	-5.16580889297008	17.5	One	Core
Chr3	239945	247460	LTR	0.0811912567871805	0.20389125799573604	1.2281741846707	5.03065184543009	9.266234652388029	8.710371606458251	7.0587957154824	-4.86966150233591	20.236842105263158	One	Core
Chr3	247487	247894	Unsp	0.128629203747073	0.221130221130221	1.19375	5.03065184543009	10.052211567849099	8.77814569666566	6.325323005054309	-3.47393118833241	22.0	One	Core
Chr3	247894	248036	LTR	0.108209578947368	0.190140845070423	1.375	5.03065184543009	10.4917892882657	9.171899239287539	3.91410310870045	-6.643856189774719	28.0	One	Core
Chr3	247978	248615	Unsp	0.132479019607843	0.240188383045526	1.24420677361854	5.03065184543009	9.920423904211802	8.76051408161968	5.957929241490201	-5.38751643651494	15.75	One	Core
Chr3	248615	249151	LTR	0.174564	0.210820895522388	1.2703703703703701	5.03065184543009	9.65282437410031	9.162024166080311	6.03443300234216	-5.05889368905357	11.833333333333334	One	Core
Chr3	249151	259485	LTR	0.0829654989384289	0.17855875044373395	1.1859943977591	5.03065184543009	9.18630470851243	8.46317551344771	4.86765110091168	-4.97143084780323	23.83653846153846	One	Core
Chr3	249939	257443	LTR	0.0889302765531062	0.174018289402905	1.18970189701897	5.03065184543009	9.251308873272189	8.43400579775267	4.51735281660522	-5.15405092209391	25.486842105263158	One	Core
Chr3	259485	260123	Unsp	0.121927643504532	0.26489028213166105	1.4888888888888898	5.03065184543009	9.921846112300289	8.56792001039608	6.483515670849349	-5.12615012746	4.25	One	Core
Chr3	260206	265190	LTR	0.0866021477079796	0.18816517667092397	1.22707805015497	5.03065184543009	9.025225995084009	8.397549724147119	4.93319216000083	-5.05145710021179	16.78	One	Core
Chr3	263281	263563	Unsp	0.13140992592592599	0.26950354609929106	1.27454545454545	5.03065184543009	9.87270128387025	9.16920097194157	6.68231941282095	-4.33340087933131	6.75	One	Core
Chr3	332732	332994	DNA	0.0716967175572519	0.32061068702290096	0.674242424242424	5.03065184543009	8.59365904972798	9.13057303337839	8.35739700121172	-5.32624108775844	0.0	One	LS
Chr3	336600	336830	Unsp	0.274787772925764	0.578260869565217	-0.875555555555556	5.100184687091179	7.52245005471819	8.27371520950123	9.59626566088057	-6.3583730274927595	0.0	Two	LS
Chr3	342666	342882	Unsp	0.18432097457627103	0.5787037037037039	0.527777777777778	5.16928288619553	0.8599040019093759	9.148261634130089	9.793029376972552	-6.418328609564	0.0	Three	LS
Chr3	346009	346190	Unsp	0.256897	0.535911602209945	0.455	5.173816680909019	0.0	10.1378029316483	9.74615864192121	-6.643856189774719	0.0	Three	LS
Chr3	354455	354620	Unsp	0.369816214689266	0.5333333333333329	-0.27192982456140397	5.03065184543009	8.550431115582349	9.236466205772	9.916890625757949	-6.1239726686963705	0.0	Two	LS
Chr3	419769	419915	Unsp	0.311199225806452	0.410958904109589	-0.620300751879699	5.10471848180467	7.078142126779371	6.3396080873068	10.296293516373	-6.643856189774719	0.3333333333333333	Two	Core
Chr3	489568	489712	Unsp	0.028310000000000002	0.5763888888888891	-0.891666666666667	5.65495190290429	8.34733259384632	6.02016870778659	9.76910826288282	-6.45223611723309	0.0	Two	Core
Chr3	599663	599866	Unsp	0.272721146788991	0.47783251231527096	-1.28947368421053	5.21966174099868	0.0	7.865880425596959	10.073864280836698	-6.643856189774719	0.0	Three	Core
Chr3	604572	604692	Unsp	0.29105836065573804	0.5416666666666671	-1.29761904761905	5.35315680208378	0.0	8.3611902957148	9.733935377169141	-6.643856189774719	0.0	Three	Core
Chr3	615597	615844	DNA	0.175594140625	0.47368421052631604	-0.0925925925925926	5.46593004015942	6.63353301215272	7.8563131531191805	9.813327897033199	-6.42517900997404	0.0	Two	Core
Chr3	624078	624203	Unsp	0.23135185185185198	0.46399999999999997	0.982456140350877	5.45848724298488	0.0	8.620414467286299	9.932650585016189	-6.643856189774719	0.0	Three	Core
Chr3	638709	638909	Unsp	0.19397726027397302	0.57	-0.6625	5.848639263451131	7.67511942549895	8.25157975159682	9.50586026351698	-6.22022754193837	0.0	Two	Core
Chr3	658965	659078	Unsp	0.209864117647059	0.548672566371681	-0.444444444444444	5.03065184543009	6.847966805231921	6.31197319290555	10.3342621567945	-6.0049917507545905	0.0	Two	Core
Chr3	858059	858186	Unsp	0.0860362595419847	0.5196850393700789	0.4962406015037589	5.513308396997569	0.0	6.279964350619741	9.75512712983006	-6.643856189774719	0.0	Three	Core
Chr3	888285	888543	DNA	0.12233022988505698	0.31782945736434104	0.857843137254902	5.100184687091179	0.749954984086342	7.3124277068706105	8.56752560773764	-6.24275788145376	1.0	Three	Core
Chr3	960110	960254	Unsp	0.287643133333333	0.527777777777778	-0.0888888888888888	5.17425132346575	7.64898151594323	8.73534411322799	9.736620058715609	-6.3323950939384295	0.0	Two	Core
Chr3	1069032	1069183	Unsp	0.2847545	0.543046357615894	-0.404761904761905	5.03065184543009	7.33111974659659	7.521654203713549	10.5418449909095	-6.643856189774719	0.0	Two	Core
Chr3	1195228	1195370	Unsp	0.34803	0.514084507042254	-0.891025641025641	5.10471848180467	0.0	7.413596267300839	9.34711907819276	-6.25296477782758	0.0	Three	Core
Chr3	1305477	1307745	LINE	0.02041890625	0.5502645502645501	-0.685882664047448	11.5309635021412	5.29769899071219	7.45522437496555	9.31455457676644	-6.222327146380991	19.958333333333332	Two	Core
Chr3	1463598	1463777	Unsp	0.188064162436548	0.5642458100558659	0.272727272727273	5.03065184543009	7.09629190943532	9.296643542290571	8.98000993785148	-5.8820159269694905	0.0	Two	Core
Chr3	1464586	1464759	Unsp	0.254180842105263	0.5202312138728321	-0.561497326203209	5.03065184543009	0.0	7.23039750970881	10.0532882225643	-6.643856189774719	0.0	Three	Core
Chr3	1511502	1511616	Unsp	0.21719073170731698	0.508771929824561	-0.0666666666666667	5.36606314650378	7.25691317303594	10.520644622752698	9.306658625871789	-6.643856189774719	0.0	Two	Core
Chr3	1681078	1681234	LTR	0.141682395209581	0.5512820512820511	-0.6875	6.807813268399639	7.219927463205599	7.94847723204105	10.1716126988531	-6.643856189774719	0.0	Two	Core
Chr3	1684293	1684518	Unsp	0.23453283898305102	0.502222222222222	-0.204761904761905	6.49164748111022	1.74266420308466	6.75076514305183	9.86581560012863	-6.06445015550188	0.0	Three	Core
Chr3	1722587	1722768	LTR	0.185625906735751	0.5193370165745861	1.1776315789473701	5.03065184543009	9.18513340904588	8.916700600332181	9.09186498902377	-4.9502524290497405	0.3333333333333333	One	Core
Chr3	1723134	1738329	LTR	0.10713375381485199	0.294297352342159	1.3767533356141002	5.03065184543009	8.65325252140406	8.32667607455859	6.43291975772143	-4.25571041821362	14.88888888888889	One	Core
Chr3	1723517	1730345	LTR	0.376826280299692	0.200937316930287	1.21212179802343	5.03065184543009	8.16050500330412	8.202194788745379	5.397903451952961	-4.41994063612046	19.6231884057971	One	Core
Chr3	1730691	1737172	LTR	0.287167712569316	0.281900941212776	1.3886898350661998	5.03065184543009	9.06980687513496	8.364548793588199	6.48793205937186	-4.3062647145284805	8.848484848484848	One	Core
Chr3	1737172	1737667	LTR	0.0618202702702703	0.513131313131313	-0.277319086935405	5.03065184543009	8.81722984592308	7.6478991362884905	9.314139343840981	-5.75655871680223	12.833333333333334	Two	Core
Chr3	1737670	1738069	LTR	0.19798108695652203	0.28822055137844604	1.46386630532972	5.03065184543009	9.616604947405401	9.39636313836912	7.33595410837909	-3.96456630650541	6.8	One	Core
Chr3	1738329	1747690	LTR	0.0849709703969202	0.21161548731642202	1.24035598801215	5.03065184543009	8.716301445423879	8.393887538024861	6.57777531950228	-4.66777974550709	27.085106382978722	One	Core
Chr3	1743294	1745151	DNA	0.0010779224973089302	0.511039310716209	-0.394765723934149	5.03065184543009	8.123681620643	8.1425205392705	8.4155793776692	-6.39406389500946	31.95	Two	Core
Chr3	1747697	1748073	LTR	0.107179047619048	0.265957446808511	1.49023569023569	5.03065184543009	9.98108359346294	8.755283914775879	7.0700149118250195	-4.89842901686032	27.4	One	Core
Chr3	1748071	1748352	Unsp	0.11046577854671301	0.31672597864768703	1.5	5.03065184543009	10.4762997383223	8.85459699419839	6.9247362147183	-4.578189272125731	18.0	One	Core
Chr3	1748436	1749070	Unsp	0.0877305900151286	0.274447949526814	1.3632478632478602	5.03065184543009	8.80918093122081	8.60296794184833	6.55155882731412	-4.744535358525071	19.285714285714285	One	Core
Chr3	1749070	1754122	LTR	0.0526664383012821	0.19076426698931198	1.27840986049032	5.03065184543009	8.67165413539175	8.34771447288113	4.94405035209243	-3.9548438188314505	21.26923076923077	One	Core
Chr3	1754202	1754847	Unsp	0.0880891952309985	0.293023255813953	1.432131495228	5.03065184543009	8.7057200197286	9.08241397773486	6.83801534895985	-4.10239018396139	9.0	One	Core
Chr3	1754835	1755201	Unsp	0.1065978125	0.26775956284153	1.45652173913043	5.03065184543009	9.566951038602099	8.71871175683293	6.84777734773745	-3.78587519464715	21.2	One	Core
Chr3	1755284	1755625	Unsp	0.110746327683616	0.310850439882698	1.22883720930233	5.03065184543009	7.690772458786781	8.83560335648995	7.16414506192001	-4.2583279326586005	17.4	One	Core
Chr3	1764268	1764570	LTR	0.286158139534884	0.510121457489879	-0.385185185185185	6.10075934452482	5.095029231806031	8.65969213144013	9.136360352948529	-5.1338820795334605	23.0	Two	Core
Chr3	1767457	1767706	DNA	0.135714110671937	0.317269076305221	0.643636363636364	5.16928288619553	7.7438733458550795	7.72898655098143	8.98968798634609	-6.643856189774719	0.5	Two	Core
Chr3	1800614	1800717	Unsp	0.302590642201835	0.5533980582524269	-0.43181818181818205	5.30060340585908	7.729820270055701	8.28127063279911	9.892535125221029	-6.643856189774719	0.0	Two	Core
Chr3	1815798	1815976	Unsp	0.252436373056995	0.573033707865168	-0.49431818181818205	5.2265367694845	1.5751879909585402	9.218428674495241	9.312028707075529	-6.643856189774719	0.0	Three	Core
Chr3	1824015	1824264	DNA	0.163903188976378	0.46184738955823296	-0.208909370199693	5.128900853839269	6.2723954021173896	8.906890002769881	9.273298597569699	-6.4668335569729605	0.0	Two	Core
Chr3	1892250	1892510	DNA	0.0804268199233717	0.307692307692308	0.5125448028673839	5.16928288619553	0.0	6.06205890299649	8.591185467219171	-6.14486691216342	0.5	Three	Core
Chr3	1932130	1932392	Unsp	0.320184714828897	0.465648854961832	0.6061120543293721	5.16928288619553	6.55933302750526	8.22852599087073	9.02120575209706	-6.11628424827453	13.666666666666666	Two	Core
Chr3	1932399	1932680	LTR	0.202518881118881	0.45195729537366497	-0.262228260869565	5.91795839946015	0.701096775429896	8.212370700567009	8.76413138505103	-5.4323520845810105	4.75	Three	Core
Chr3	1932680	1933320	Unsp	0.0986136448598131	0.3171875	1.5367575462512202	5.03065184543009	7.8365397133432495	8.41322720437452	8.069955231842481	-4.236171671693899	18.125	One	Core
Chr3	1933320	1933430	Unsp	0.0734758928571428	0.4	2.0	5.03065184543009	1.38261533025196	8.51949907765121	9.11505181233046	-4.49060992947904	25.0	Three	Core
Chr3	1933730	1934231	Unsp	0.13266483168316803	0.383233532934132	1.0514619883040899	5.09975004453444	7.11230918274521	8.5287484391881	8.55035682828371	-5.46382116068757	21.333333333333332	One	Core
Chr3	2061105	2061936	DNA	0.164072673147023	0.5222623345367029	0.45744680851063796	5.2731378165889105	1.18050345318675	6.99078720883138	9.69985476293703	-6.34050285192067	0.0	Three	Core
Chr3	2092523	2092664	Unsp	0.0571832867132867	0.567375886524823	-0.825	5.26872180881972	0.0	6.57197799417226	9.41243077337417	-6.09337305684335	0.0	Three	Core
Chr3	2197602	2197779	Unsp	0.254374603174603	0.559322033898305	0.0362318840579712	5.09975004453444	1.58062391584391	4.99783635614399	9.789613715511882	-6.414739555167179	0.0	Three	Core
Chr3	2371786	2372011	LTR	0.19771675799086802	0.253333333333333	1.78125	5.03065184543009	9.4436767989092	8.900792225487269	7.02628437004306	-6.643856189774719	13.5	One	Core
Chr3	2372013	2372412	Unsp	0.18180025252525303	0.318295739348371	0.8406926406926409	5.03065184543009	8.74150978183249	8.481041659867559	7.535259790043679	-3.41166414482772	12.8	One	Core
Chr3	2374572	2375331	LTR	0.178786843467012	0.17786561264822098	1.18531976744186	5.100184687091179	8.51195836232224	8.261083246564091	4.94708387202233	-4.599462070416269	21.555555555555557	One	Core
Chr3	2375418	2375788	Unsp	0.0935379487179487	0.27027027027027	1.27972027972028	5.03065184543009	8.960386676089788	9.24611561767304	6.987010268634171	-3.13989341116705	16.75	One	Core
Chr3	2375871	2376066	Unsp	0.0993092682926829	0.29230769230769205	1.46666666666667	5.03065184543009	9.574288518927	9.13597628708579	7.39891735799461	-6.643856189774719	19.333333333333332	One	Core
Chr3	2376066	2383635	LTR	0.10197497646267699	0.24132811445539198	1.32978588344442	5.03065184543009	9.621495854553269	7.895269606388919	5.72295180848663	-5.66177534957466	22.883116883116884	One	Core
Chr3	2383635	2384082	Unsp	0.135885961538462	0.21700223713646502	1.05087719298246	5.10471848180467	10.480371873112801	7.56780411789904	5.642341581235041	-6.643856189774719	24.4	One	Core
Chr3	2384082	2385998	LTR	0.0884421120913337	0.188413361169102	1.21904024767802	5.03065184543009	9.42840246502738	7.8815645747652106	4.547514306575481	-6.643856189774719	28.65	One	Core
Chr3	2385998	2386638	LTR	0.12187399317406099	0.217993079584775	1.24365045200172	5.03065184543009	10.3428971942867	8.05733727445469	6.00805037038505	-5.67187056594432	23.25	One	Core
Chr3	2386637	2386781	LTR	0.18566624203821697	0.4583333333333329	1.6060606060606102	5.03065184543009	10.6591687918224	9.3384760038299	7.74635415964709	-6.643856189774719	18.5	One	Core
Chr3	2386880	2388468	LTR	0.0867060480207657	0.206784083496412	1.22855239047143	5.03065184543009	9.43163993625482	7.69241440666767	5.593062312156089	-6.08197730216661	18.705882352941178	One	Core
Chr3	2388468	2401393	LTR	0.0952946446615022	0.22241029113067	1.3310283564411598	5.03065184543009	10.1697987629233	7.83281699461826	6.11484934157979	-6.10277499603649	21.138461538461538	One	Core
Chr3	2389855	2399723	LTR	0.0896805331441314	0.24791369835131302	1.31791106223976	5.03065184543009	10.185894207495199	7.77730023808074	6.22140244063761	-5.63861807885869	20.71	One	Core
Chr3	2401440	2405849	LTR	0.0894299819413093	0.19550918575640697	1.24838123845794	5.03065184543009	9.704367055577231	7.622193509482581	4.94087024457295	-5.778843857556	24.6	One	Core
Chr3	2405849	2407008	LTR	0.0991124955595027	0.23450134770889497	1.28269537480064	5.03065184543009	10.030305255518698	8.18485696701171	5.838276056935659	-6.13779451680048	32.23076923076923	One	Core
Chr3	2407008	2419626	LTR	0.0989412941176471	0.20254237288135604	1.24835053290475	5.03065184543009	9.93919916161461	7.60414042920555	5.53101483746847	-5.86481466303478	24.64566929133858	One	Core
Chr3	2407715	2407912	LTR	0.0895333165829146	0.314720812182741	1.77272727272727	5.03065184543009	9.791122998253831	7.0334523345371505	6.78601490312452	-5.58245564511058	26.333333333333332	One	Core
Chr3	2407960	2415514	LTR	0.0899617128632939	0.228022721125237	1.2864202979621	5.03065184543009	10.0443645429001	7.71023062754339	5.70701458832043	-5.64977846357169	23.324675324675326	One	Core
Chr3	2419626	2419823	LTR	0.0951463316582914	0.33502538071065996	1.33333333333333	5.03065184543009	10.500092774876	8.76764319697052	7.805816289969361	-5.936409682528571	17.333333333333332	One	Core
Chr3	2419871	2433541	LTR	0.08533868456678699	0.181962383865851	1.20575817609042	5.03065184543009	9.95464320536297	7.5479821923088	5.49811650036119	-5.78169683118968	25.391304347826086	One	Core
Chr3	2423298	2425183	LTR	0.143574202271498	0.280065005417118	1.1991502920871002	5.03065184543009	10.306854428869	7.8442381268573	6.58837126133394	-5.68062799869184	26.45	One	Core
Chr3	2425183	2432555	LTR	0.0950549979353063	0.21577854671280303	1.26763112365689	5.03065184543009	9.977699572474561	7.59075425943117	5.44785369855328	-5.855360294968441	23.773333333333333	One	Core
Chr3	2433588	2436704	LTR	0.0953744008056395	0.207164582629267	1.24716075805171	5.03065184543009	9.940393538614538	7.46077208155563	5.41505028119021	-6.29452193754671	28.848484848484848	One	Core
Chr3	2436704	2438848	LTR	0.0859195567867036	0.25419776119403004	1.23453389830508	5.38752645406029	10.4737410578304	7.8186730714703705	6.475377916343289	-5.49084457126876	19.636363636363637	One	Core
Chr3	2438850	2441511	LTR	0.140039261876718	0.18324197337509804	1.12652895203231	5.03065184543009	9.75399835554276	7.32026438534583	5.31457664584405	-5.6950815131299	30.535714285714285	One	Core
Chr3	2441511	2444348	LTR	0.0949687139689579	0.19306746179649598	1.18792270531401	5.03065184543009	9.98918104323384	7.409168111884969	4.95842064384667	-6.032928665266909	28.310344827586206	One	Core
Chr3	2444348	2449363	LTR	0.0960051589682064	0.24939662107803698	1.2846000837520901	5.03065184543009	10.206147938839	7.803555732263909	6.28586389235661	-5.8018006743415995	24.627450980392158	One	Core
Chr3	2449363	2456941	LTR	0.112955776231263	0.24311618535930202	1.3117117117117099	5.03065184543009	9.92086736610542	7.55973462135233	6.1149883901433	-5.766734570576559	23.649350649350648	One	Core
Chr3	2456941	2460264	LTR	0.0521247880299252	0.23745294855708898	1.20794211747977	5.03065184543009	9.99214006603082	7.8769737826609	6.340795515423809	-6.0073789833464	17.235294117647058	One	Core
Chr3	2460301	2460939	Unsp	0.10670406015037599	0.332288401253919	1.32997936016512	5.100184687091179	10.6614869837111	8.23298788124719	7.14158990868441	-5.8998985219502	9.714285714285714	One	Core
Chr3	2460939	2472748	LTR	0.0973894400396432	0.21713147410358605	1.2718342734876498	5.03065184543009	10.2306021698449	7.751215587865371	6.34884722661146	-5.797565605170179	21.81512605042017	One	Core
Chr3	2462323	2472124	LTR	0.0959257750946485	0.263914561511604	1.32974221211965	5.03065184543009	10.304671627448199	7.75343293030514	6.457411749647799	-5.7988792972900995	21.404040404040405	One	Core
Chr3	2472748	2476469	LTR	0.11863312324141802	0.21127159444916502	1.2532627865961201	5.03065184543009	10.0075890147744	7.6154132103190495	5.42758531327162	-5.76572819330374	28.07894736842105	One	Core
Chr3	2476469	2484036	LTR	0.0908543224676724	0.21831462193967302	1.23391253611123	5.03065184543009	10.0395070347891	7.52572579155851	5.4651716994454596	-5.94545044213956	25.571428571428573	One	Core
Chr3	2484036	2487893	LTR	0.104050552147239	0.187818620874698	1.1683563472101002	5.03065184543009	9.804692611429221	7.79162606446175	4.99926232734598	-6.236487911390481	31.153846153846153	One	Core
Chr3	2487893	2495465	LTR	0.10727410197766699	0.23972972972973	1.28907519536304	5.03065184543009	9.928053473513618	7.59036149798422	5.815314520029019	-5.91504143672938	22.805194805194805	One	Core
Chr3	2495465	2498969	LTR	0.0919681908548708	0.142694063926941	1.14300832755031	5.03065184543009	9.236724303867849	7.1027484089807995	3.7751098482981496	-6.643856189774719	34.083333333333336	One	Core
Chr3	2499067	2499202	LTR	0.212426092715232	0.42962962962962997	2.06666666666667	5.03065184543009	10.710745498473699	8.59451833165055	7.70283949869941	-4.11731037527889	22.333333333333332	One	Core
Chr3	2499314	2504076	LTR	0.082915	0.254564755838641	1.3141144012838302	5.03065184543009	10.2444374494192	7.8232538569069	6.377097838141849	-5.7652686133355	20.291666666666668	One	Core
Chr3	2504355	2504807	LTR	0.19240555555555605	0.30088495575221197	1.6375	5.03065184543009	10.647363097145801	7.54580148573784	7.379002952380019	-5.47142084310029	22.333333333333332	One	Core
Chr3	2504807	2510128	LTR	0.0890504049726879	0.22845235840121203	1.28659932659933	5.03065184543009	10.1136568907912	7.718485529664661	5.92863199912972	-5.808260749619531	21.796296296296298	One	Core
Chr3	2510128	2512938	LTR	0.151698469387755	0.249110320284698	1.34163173652695	5.03065184543009	9.95218585659413	7.667574540885901	6.07796275355196	-5.6179277247842005	28.20689655172414	One	Core
Chr3	2512938	2520113	LTR	0.116422956323801	0.24006859102600697	1.3096364609853899	5.03065184543009	9.926646949949609	7.66645790306222	5.82565505126065	-5.94402792991987	22.315068493150687	One	Core
Chr3	2520113	2521117	LTR	0.143973975535168	0.33264675592173	1.4894957983193302	5.03065184543009	10.664698892932499	7.48808894676287	7.2306571569305005	-5.31016464557152	14.181818181818182	One	Core
Chr3	2521117	2525425	LTR	0.10348434974454303	0.230230930720784	1.2715236419156002	5.03065184543009	10.146699684531198	7.795051879019179	5.783879176015719	-5.76499262727636	25.704545454545453	One	Core
Chr3	2525425	2539216	LTR	0.0909990556189855	0.183529796987557	1.21110829031621	5.03065184543009	9.500326809311119	7.733464690606019	5.20187974002909	-5.53634613364969	24.841726618705035	One	Core
Chr3	2529505	2537075	LTR	0.0976508716642081	0.222791638570465	1.29787628822257	5.03065184543009	9.38417541854136	7.713270133923559	5.52007102180139	-5.4647206320430195	21.43421052631579	One	Core
Chr3	2539280	2539414	LTR	0.17271507246376802	0.313432835820896	1.5	5.03065184543009	10.087213557949301	9.26844308336898	6.9812037733371	-6.643856189774719	24.333333333333332	One	Core
Chr3	2539414	2541266	LTR	0.130453030821918	0.20926243567752997	1.18574795647159	5.03065184543009	8.3003807214017	8.08164264972952	5.5110433224152	-4.712335927657491	31.105263157894736	One	Core
Chr3	2541266	2541422	LTR	0.20219842767295604	0.30128205128205104	1.24561403508772	5.10471848180467	8.96758167245281	9.09660073491318	7.838629812593889	-6.643856189774719	4.666666666666667	One	Core
Chr3	2543868	2544093	DNA	0.22905137931034503	0.422222222222222	-0.6785714285714289	5.49551977287838	7.7023559756699	7.959431872648	9.6473286914075	-6.09601771507311	0.6666666666666666	Two	Core
Chr3	2554606	2554814	DNA	0.269629333333333	0.28365384615384603	1.28869565217391	5.03065184543009	8.70247837850813	7.88357547064849	8.05318380550257	-6.643856189774719	3.0	One	Core
Chr3	2554972	2555167	DNA	0.216908426395939	0.23076923076923103	1.09150326797386	5.09975004453444	0.0	8.45758470330078	7.53245840288015	-6.643856189774719	5.0	Three	Core
Chr3	2760159	2764905	LTR	0.334146124473097	0.19766575614601395	1.22645457997553	5.03065184543009	7.88640340771255	8.13451009710334	5.339239876771019	-4.14954783047902	19.46938775510204	One	Core
Chr3	2763619	2764255	Unsp	0.11034823529411802	0.30503144654088	1.29012345679012	5.03065184543009	7.796269408836791	8.33716754441186	6.640406914512051	-4.05889368905357	14.428571428571429	One	Core
Chr3	2764905	2765378	LTR	0.354282909090909	0.29598308668076095	1.43240093240093	5.03065184543009	9.48741954998741	8.7365510238739	6.7180272409305	-4.08627012798487	4.0	One	Core
Chr3	2765378	2771359	LTR	0.30696995639047303	0.26182912556428695	1.41052721233285	5.03065184543009	8.86799834597335	8.12118313957771	6.105066733168679	-4.12872538180014	9.639344262295081	One	Core
Chr3	2771359	2771545	LTR	0.326844836956522	0.31182795698924703	1.64166666666667	5.21966174099868	8.33962565008644	8.66070496854459	7.849060710725219	-3.77807429405261	18.333333333333332	One	Core
Chr3	2771545	2778466	LTR	0.07200505254066498	0.516543852044502	-0.331095192613817	5.2277855635108	6.968553733890049	7.64505722472535	9.01096499486222	-6.272185666686621	22.47142857142857	Two	Core
Chr3	2778465	2778806	LTR	0.20988126760563397	0.255131964809384	1.14658925979681	5.03065184543009	5.6275968389183895	8.53952965847737	7.6399556914089795	-3.0995356735509105	12.8	One	Core
Chr3	2778806	2781514	LTR	0.09201594336153	0.20162481536189103	1.15634438403866	5.03065184543009	7.674069838761961	8.179940130998741	5.2121921881090305	-4.14399262942763	18.392857142857142	One	Core
Chr3	2781930	2782037	Unsp	0.299255089285714	0.43925233644859796	0.653846153846154	5.27430674119526	1.4075696340742	7.92505051298421	8.766082604704781	-5.62920941381032	3.5	Three	Core
Chr3	2856181	2856433	LTR	0.323350948616601	0.472222222222222	-0.24285714285714302	5.03065184543009	6.24202989218894	9.81368804824935	8.976909965655212	-6.1261726419545806	0.0	Two	LS
Chr3	2856454	2856617	Unsp	0.214187670454545	0.54601226993865	0.0235294117647058	5.03065184543009	8.47028924272624	10.055342559293301	9.489619591272051	-6.34408768174227	0.0	Two	LS
Chr3	2857324	2857536	Unsp	0.164219826086957	0.547169811320755	0.968181818181818	5.3026420836662	6.30477429765578	9.60677300307677	9.60345904964263	-6.366627902358179	0.0	Two	LS
Chr3	2858221	2858428	Unsp	0.1663721875	0.555555555555556	-0.505681818181818	5.43934364119169	1.4335157891952601	7.642124022080799	9.81199598520284	-5.985727276491599	7.0	Three	LS
Chr3	2953025	2953364	LTR	0.503663855421687	0.51622418879056	-0.7680180180180181	5.03065184543009	0.0	7.69628673901236	8.690648145552519	-6.2925988139709	0.0	Three	Core
Chr3	2953772	2953959	Unsp	0.197235365853659	0.572192513368984	1.1363636363636398	5.03065184543009	0.0	8.68972175416427	9.36252555270032	-5.91166773587039	0.0	Three	Core
Chr3	2972704	2972891	DNA	0.29180500000000004	0.438502673796791	-0.6579710144927541	5.16928288619553	8.27597389673107	8.340349930239402	9.23037590356698	-6.643856189774719	0.0	Two	Core
Chr3	2975677	2975807	Unsp	0.19071032258064496	0.476923076923077	0.8642857142857142	5.10471848180467	1.2376835713791001	7.8615782073251	9.99358050582966	-6.643856189774719	0.0	Three	Core
Chr3	3067410	3068147	DNA	0.0855078629032258	0.373134328358209	1.6488801054018403	5.46926348134598	5.35730440571259	8.498917547476129	8.36146328667807	-3.8935405649940598	1.25	One	Core
Chr3	3090030	3090289	DNA	0.0842712643678161	0.32046332046332	0.14417989417989402	5.2433495225700995	6.14867158367087	6.24645899713288	8.6138491750449	-6.643856189774719	2.0	Two	Core
Chr3	3164962	3165162	Unsp	0.175145	0.555	0.650717703349282	5.03065184543009	6.905196888809151	8.87350132535623	9.227307586724029	-6.23474352445299	0.0	Two	Core
Chr3	3255125	3255275	LTR	0.23290740740740698	0.54	-0.7222222222222221	5.6150069210452696	7.12675352572021	8.85952438775324	10.247613162436402	-6.643856189774719	0.0	Two	Core
Chr3	3255620	3256402	LTR	0.39616935064935105	0.547723935389134	-0.932835820895522	6.922832972366309	5.965053843040071	6.69803232607829	9.679921704163279	-6.10512581884819	0.0	Two	Core
Chr3	3350700	3350883	Unsp	0.235330612244898	0.508196721311475	-0.48868778280543	5.03065184543009	0.9728229974506821	9.848814328118971	9.087566050280358	-6.643856189774719	0.0	Three	Core
Chr3	3350947	3351158	Unsp	0.162258333333333	0.5639810426540279	0.444444444444444	5.03065184543009	7.61026184174577	9.68575302969565	9.187721613483571	-6.151176820056571	4.0	Two	Core
Chr3	3351159	3351329	Unsp	0.3510665	0.429411764705882	-0.136363636363636	5.03065184543009	7.752233368755981	10.0702857414054	8.84966552667675	-6.057688933208281	0.0	Two	Core
Chr3	3351384	3351566	Unsp	0.189238838383838	0.48351648351648396	0.745454545454545	5.03065184543009	7.8480911153233395	9.48879219041447	9.19061217851982	-6.1386896222052405	0.0	Two	Core
Chr3	3602323	3608196	LTR	0.00365665896843726	0.533127293799498	-0.797188626658825	5.2731378165889105	5.65908728726354	6.947535776750129	9.3906163025806	-6.270268277784701	16.033898305084747	Two	Core
Chr3	3614318	3614545	LTR	0.27855668085106394	0.277533039647577	0.898275862068965	5.33117980020708	1.7336841647748997	9.59163146897175	8.83804930591468	-6.643856189774719	0.3333333333333333	Three	Core
Chr3	3615872	3616143	LTR	0.266925631768953	0.45756457564575603	-0.55316091954023	6.24237926278093	6.8722861901318	9.20460377570224	8.95112412923076	-6.267001884383769	0.0	Two	Core
Chr3	3619702	3619982	LTR	0.331536917562724	0.475	-0.6120879120879119	5.20296749021384	0.703085679683038	9.207424532347051	9.81852083557376	-6.36716123435721	7.666666666666667	Three	Core
Chr3	3623223	3623432	LTR	0.30219333333333304	0.43540669856459296	-0.3928571428571429	5.100184687091179	7.49520734297338	10.2834372625724	9.13450633870599	-5.948579408221709	0.0	Two	Core
Chr3	3627413	3627625	Unsp	0.180026788990826	0.46698113207547204	0.796296296296296	5.03065184543009	7.217280997770129	10.206961869490199	9.38137569167418	-5.91700593970058	0.0	Two	Core
Chr3	3736830	3737088	DNA	0.10097379310344802	0.31007751937984496	0.6048387096774189	5.09975004453444	0.0	8.13268015288939	9.43007277598876	-5.95701407503435	1.6666666666666667	Three	Core
Chr3	3747318	3747585	LTR	0.18078952205882395	0.42322097378277207	0.33333333333333304	5.03065184543009	6.96382900832869	9.249777502594071	8.07463649723924	-3.8734954751993196	5.333333333333333	One	Core
Chr3	3749288	3749932	Unsp	0.110007310549777	0.31521739130434806	1.384858812074	5.03065184543009	9.04583937536541	9.16583613779582	6.60433612347884	-4.49287561095621	3.375	One	Core
Chr3	3750484	3750722	DNA	0.35018899563318795	0.260504201680672	1.30184331797235	5.03065184543009	7.42434808715155	10.5272603515194	6.316762944832631	-5.375750794393509	13.25	One	LS
Chr3	3754679	3754973	Unsp	0.132327766990291	0.27891156462585	1.43650793650794	5.03065184543009	8.67321139922083	10.3889310996025	7.87039085805776	-4.78325924644014	6.5	One	LS
Chr3	3785230	3785409	Unsp	0.18745840425531898	0.497206703910615	-0.166666666666667	5.03065184543009	1.56979293017445	9.68539063603675	9.314057497821231	-5.97799933497208	0.0	Three	Core
Chr3	3886704	3886870	Unsp	0.298019759036145	0.542168674698795	0.277777777777778	5.03065184543009	0.0	7.6372993163370095	9.94027679992682	-6.0440966871254895	0.0	Three	Core
Chr3	3899450	3899656	Unsp	0.275087058823529	0.480582524271845	-0.35	5.660385076638111	0.8911622131218191	7.96836536528	9.79405416350402	-6.1781926174259105	0.0	Three	Core
Chr3	3909812	3910043	DNA	0.23967194214876	0.47619047619047605	-0.6977225672877849	5.03065184543009	8.34994953722809	8.772358163091331	10.150428155257599	-6.24829164646947	0.0	Two	Core
Chr3	3914786	3915001	Unsp	0.20295881057268697	0.581395348837209	0.7729468599033821	5.03065184543009	4.765493274956469	9.82192474571785	9.6841551560487	-6.02314366410437	0.0	Two	LS
Chr3	3973615	3973997	DNA	0.218548727272727	0.5732984293193721	-0.653846153846154	5.46555974745766	0.5458316072303371	7.974108345348981	9.398818010024211	-6.31791096902907	0.0	Three	Core
Chr3	4043326	4043635	LTR	0.27764764890282106	0.4692556634304211	-0.277432712215321	6.71759402138116	6.35362990693813	7.98402370928469	9.47385678541836	-6.25578573809615	0.0	Two	Core
Chr3	4152495	4152765	LTR	0.31294	0.42962962962962997	-0.341191066997519	5.03065184543009	7.622416269086401	10.5936839792545	8.614775560662679	-4.98825814646051	0.0	Two	LS
Chr3	4155005	4155437	Unsp	0.295184624145786	0.40046296296296297	0.4971358428805239	5.03065184543009	9.331150251997382	9.86202328772182	8.61277089959179	-4.24652069222934	9.4	One	LS
Chr3	4168067	4168539	LINE	0.0944577039274925	0.267857142857143	1.31333333333333	5.03065184543009	9.51342027856214	10.5704400443116	7.529137280825031	-3.4567047742218198	27.333333333333332	One	LS
Chr4	2112	2572	LINE	0.0836331983805668	0.374301675977654	1.6987522281639902	5.03065184543009	8.9522204676646	9.71064827813732	8.409313696584231	-5.14228872676973	26.4	One	LS
Chr4	68838	68978	LTR	0.11844836601307199	0.564285714285714	0.2	5.41899828375263	1.17663168414485	7.77114128753836	10.144395303733198	-6.643856189774719	0.0	Three	Core
Chr4	184371	184557	Unsp	0.35625911602209903	0.5645161290322579	-1.2	5.03065184543009	0.0	7.51117558911467	9.44768645748386	-6.31754077764642	0.0	Three	Core
Chr4	280229	280421	Unsp	0.219280710900474	0.5208333333333329	0.008771929824561429	5.03065184543009	3.05979211284633	8.92440086475857	9.88335249083318	-6.37888397969944	0.0	Three	LS
Chr4	284765	284893	Unsp	0.0692072727272727	0.5078125	0.375	5.34688750021642	7.559365881867089	8.50040873692244	10.188288658497198	-6.643856189774719	0.0	Two	LS
Chr4	284974	285093	LTR	0.331310151515152	0.5378151260504199	-0.866666666666667	5.16928288619553	7.25219568150445	8.436705730101401	9.97549684713681	-5.830269314005611	0.0	Two	LS
Chr4	295688	295855	Unsp	0.231295260115607	0.467065868263473	-0.272727272727273	5.03065184543009	8.054858447587879	10.7651046987609	9.248723247076711	-6.158429362604481	0.0	Two	LS
Chr4	347299	347424	Unsp	0.0958333333333333	0.52	0.0555555555555556	5.09975004453444	5.34209004042609	9.131285622554929	9.869875431722981	-6.643856189774719	0.0	Two	Core
Chr4	382871	382986	DNA	0.22695315789473702	0.565217391304348	-0.12820512820512803	5.03065184543009	8.22477223541816	7.51486096956347	10.9349779056973	-6.643856189774719	0.0	Two	Core
Chr4	408727	408906	Unsp	0.19075412698412697	0.497206703910615	-0.0909090909090909	5.3651771001223	0.988637801793612	7.668055776832241	9.36373369902609	-6.643856189774719	0.0	Three	Core
Chr4	493872	493998	Unsp	0.260280895522388	0.5158730158730159	0.05	5.03065184543009	7.7605892800321605	9.77383355419564	9.76134064342213	-6.643856189774719	0.0	Two	Core
Chr4	529538	529712	LTR	0.318613953488372	0.402298850574713	0.853479853479854	5.03065184543009	0.0	10.0154862574133	8.962522323569381	-6.304431447037881	0.0	Three	Core
Chr4	574905	575062	Unsp	0.24918651162790698	0.592356687898089	-1.04285714285714	5.03065184543009	0.0	8.16551406117208	9.99617401780883	-6.643856189774719	4.0	Three	Core
Chr4	581483	581667	Unsp	0.15830460000000002	0.559782608695652	0.0647058823529412	6.6318909908577295	0.0	9.52841571189687	9.83283300735216	-6.643856189774719	2.6666666666666665	Three	LS
Chr4	582177	582355	Unsp	0.29009314432989697	0.46629213483146104	0.0476190476190477	5.173816680909019	1.5751879909585402	9.495418496866211	9.35218340767235	-5.503195782837611	0.0	Three	LS
Chr4	604086	604248	Unsp	0.24264115606936398	0.506172839506173	0.0222222222222224	5.03065184543009	1.06229023800145	9.06267240586755	9.49361486288223	-6.643856189774719	3.0	Three	Core
Chr4	605609	605820	Unsp	0.160570131004367	0.5781990521327011	0.37878787878787895	5.22822020606754	8.90658962601958	7.65101510043944	9.61378845880107	-6.478037255461191	5.333333333333333	Two	Core
Chr4	687127	687353	Unsp	0.0680969298245614	0.5619469026548671	0.857142857142857	5.23354388456185	0.0	6.07437772344628	10.5116553755106	-6.4506944797620305	13.0	Three	Core
Chr4	700642	701196	DNA	0.195738856088561	0.50749063670412	0.153846153846154	5.81286543699958	5.76935801413541	7.01546811104789	9.86296892276266	-6.33887223596079	0.0	Two	Core
Chr4	775655	775811	Unsp	0.112521707317073	0.49358974358974395	-0.315789473684211	5.22419553571217	0.0	8.37031538344934	9.643786892197289	-6.30995545322129	0.0	Three	Core
Chr4	775864	776067	LTR	0.358043221153846	0.39901477832512294	-0.792307692307692	5.10471848180467	7.823458381647719	9.97160104668352	8.99413332322433	-5.1980564367251905	0.0	Two	Core
Chr4	776075	776226	Unsp	0.23595	0.52317880794702	0.516666666666667	5.03065184543009	8.251210668112721	10.0689270019959	9.488045284766072	-6.643856189774719	0.0	Two	Core
Chr4	782643	782766	Unsp	0.31111285714285697	0.48780487804878003	-0.509090909090909	6.00956120222303	8.134654304042309	10.637197582637599	9.55563456112908	-6.2699485664557395	0.0	Two	Core
Chr4	798012	798201	Unsp	0.22096815533980604	0.544973544973545	0.4428571428571429	5.03065184543009	7.91554492836268	9.526618455781561	9.983423356837301	-5.6024722690096	0.0	Two	Core
Chr4	840303	843199	LTR	0.0994804550155119	0.20616770616770602	1.13315523059618	5.03065184543009	7.871138448806831	8.72654644286048	5.539747528268629	-5.02049269465227	23.20689655172414	One	Core
Chr4	843199	850026	LTR	0.39261588339222603	0.188076754064743	1.20024520684043	5.03065184543009	8.73246366594306	8.75859319947776	4.99706083266163	-4.37702882983326	21.228571428571428	One	Core
Chr4	850026	854644	LTR	0.0783333218736571	0.200303161541793	1.17738545607398	5.03065184543009	8.38549017151701	8.8041279714242	5.549102594822741	-4.790108362232671	26.425531914893618	One	Core
Chr4	876328	876538	Unsp	0.290178933333333	0.519047619047619	0.272727272727273	5.03065184543009	1.4204148160172099	10.285298428406	9.298325983974289	-6.643856189774719	0.0	Three	Core
Chr4	877260	885264	LTR	0.0880755973012303	0.220271348762969	1.20474725374903	5.09975004453444	8.37035165146052	9.107912279894439	7.70157799321216	-4.7320022870363605	25.320987654320987	One	Core
Chr4	877762	878238	LTR	0.051792828685259	0.51890756302521	-0.37866224433388596	5.03065184543009	8.04839450780305	8.199686484781031	9.27463346825706	-6.212053161825629	14.166666666666666	Two	Core
Chr4	908673	908826	LTR	0.128268674698795	0.581699346405229	0.0615384615384615	5.398390428599829	3.50768235839753	8.41806571725137	10.773618625664898	-5.96686455056122	1.6666666666666667	Three	Core
Chr4	937389	937496	Unsp	0.26865900000000004	0.495327102803738	-0.25	5.03065184543009	8.276552835139402	10.681441150895	9.66145414844915	-6.1517424674772405	0.0	Two	LS
Chr4	940347	943682	Unsp	0.0203050464210842	0.528635682158921	-0.762682850918145	6.79073684279394	6.72359854209696	9.26739046116181	9.191584620878539	-6.286820752884691	22.029411764705884	Two	LS
Chr4	943655	946099	Unsp	0.0423473529411765	0.523322422258592	-0.589298951604363	6.180731093347559	6.068758298919481	9.275211203787	9.29308306141642	-6.15042444226019	12.28	Two	LS
Chr4	956458	956675	Unsp	0.353776197183099	0.557603686635945	-1.07	5.03065184543009	7.6477578315305195	9.44247788151641	9.399590899850661	-6.41234463947257	6.0	Two	LS
Chr4	957264	961042	Unsp	0.0357778633605909	0.543673901535204	-0.641926824418373	7.3482083067201	6.189707791759759	8.18415823154372	9.31109048040926	-6.265465592907621	5.589743589743589	Two	LS
Chr4	961039	962471	Unsp	0.0265375069252078	0.5705307262569829	-0.578544061302682	5.2277855635108	5.7087688551952995	8.09601646072664	9.4540226589672	-6.14158635221634	8.6	Two	LS
Chr4	965088	966705	Unsp	0.0509728729281768	0.641311069882498	-0.5856725146198829	5.09975004453444	4.64159778154418	7.333480228707111	9.48677489439699	-6.1331630509788395	14.055555555555555	Two	LS
Chr4	966742	967424	Unsp	0.0507208175182482	0.595307917888563	-0.9421052631578951	6.64718291372872	5.691646989611889	7.135469455024281	8.98393382601896	-6.28356165509031	17.875	Two	LS
Chr4	968122	971419	Unsp	0.012125169184290002	0.59417652411283	-0.663311688311688	7.59131781754009	6.43867745525397	7.78916079401127	9.779944782762831	-6.24771993626629	4.176470588235294	Two	LS
Chr4	971454	971817	Unsp	0.107744383561644	0.5123966942148761	-0.853682170542636	5.41966625470559	7.0032814456188	8.467245988129191	9.26962425900231	-5.87641563726817	4.0	Two	LS
Chr4	978020	982014	Unsp	0.190900258577822	0.5395593390085129	-0.61095840205241	6.505719745429619	6.29926093829242	8.80095975686798	9.28853453590205	-6.2062370125123	7.926829268292683	Two	LS
Chr4	982031	986774	Unsp	0.0378893411913281	0.5460678895214001	-0.6717292421555779	6.6980321708762895	6.4566045823963405	8.678719067975559	9.54440569788862	-6.174542103568901	8.729166666666666	Two	LS
Chr4	1017022	1022938	LTR	0.109617650220772	0.53970080552359	-0.704031713900135	11.2224182290891	5.899148674366361	7.26623431874951	9.299743719074211	-6.209370646191	31.366666666666667	Two	LS
Chr4	1037301	1037850	Unsp	0.0593095306859206	0.60655737704918	-0.7902564102564101	5.75039044815178	2.7559522159071896	6.72600604984272	10.0566463641091	-6.322916888685991	18.666666666666668	Three	LS
Chr4	1037879	1038439	Unsp	0.0344384341637011	0.6482142857142861	-0.2375	7.0031717748924995	0.956271902706294	6.03218864418063	9.889065266799301	-6.265677201892919	28.857142857142858	Three	LS
Chr4	1039130	1039824	Unsp	0.0628803165467626	0.6051873198847261	-0.673202614379085	7.91257914799284	5.743823632328019	7.43822013563949	9.72322161390142	-6.00009273110275	30.75	Two	LS
Chr4	1039798	1040838	Unsp	0.0563058024691358	0.639423076923077	-0.8367565254599909	5.472127284624599	5.00883979512175	7.61103473392543	9.82945066278066	-6.07455951570414	30.916666666666668	Two	LS
Chr4	1041249	1041361	Unsp	0.20607504587156	0.705357142857143	-0.7777777777777779	5.03065184543009	1.36650064822972	8.870439224003169	10.269910139854598	-6.643856189774719	32.0	Three	LS
Chr4	1059778	1059946	LINE	0.22898508287292801	0.4583333333333329	0.23809523809523803	5.03065184543009	0.0	10.6630984811606	8.88141922184932	-5.920109098141559	32.0	Three	LS
Chr4	1064465	1064607	DNA	0.27174131578947397	0.30281690140845097	0.27692307692307694	5.03065184543009	7.50126150643932	11.0213794081085	8.2259003836272	-6.643856189774719	30.333333333333332	Two	LS
Chr4	1074434	1074714	LTR	0.23810923076923102	0.23214285714285698	1.4047619047619	5.03065184543009	7.5016870223737895	9.68576879157687	6.383943359023321	-2.44290429271179	30.5	One	LS
Chr4	1074837	1075094	Unsp	0.22685416058394198	0.24902723735408605	1.34722222222222	5.03065184543009	6.94044640141294	8.57732400268664	7.53532038495463	-3.23577145113765	30.666666666666668	One	LS
Chr4	1100494	1100659	Unsp	0.272961797752809	0.23636363636363603	0.805555555555556	5.03065184543009	7.171498690469999	8.83073858673546	9.24331918639233	-6.643856189774719	29.333333333333332	Two	LS
Chr4	1107064	1108926	DNA	0.0042890139335477	0.5472610096670251	-0.657582179291311	6.25900421453398	6.80370086079952	8.07591913156681	8.99947364489426	-6.22265155596851	29.25	Two	LS
Chr4	1116395	1117100	Unsp	0.10148866008462598	0.51063829787234	-0.250075414781297	5.03065184543009	6.35111882621565	9.63258036889707	9.25910866188226	-6.408059516916269	24.375	Two	LS
Chr4	1118466	1119917	Unsp	0.039185219478738	0.544452101998622	-0.7924627519719541	6.50535775419439	5.91188267624591	8.57569597609125	9.55327542681559	-6.2421959223771	15.1875	Two	LS
Chr4	1125652	1125756	Unsp	0.31878899082568796	0.432692307692308	-0.5416666666666671	5.03065184543009	1.4335157891952601	10.9881538806529	9.340748103849949	-6.29788908331974	22.0	Three	LS
Chr4	1129336	1129912	LINE	0.043426510851419	0.527777777777778	-0.260364842454395	6.69513401605955	5.9878938514166995	8.55219447044933	9.519821012668249	-6.1951697229502205	18.714285714285715	Two	LS
Chr4	1131791	1132050	LTR	0.213160866425993	0.471042471042471	0.150375939849624	5.475065691082901	0.0	9.717980268372212	9.76013303746455	-6.643856189774719	34.0	Three	LS
Chr4	1135516	1135848	LTR	0.258327298050139	0.484939759036145	-0.290816326530612	5.565434202714879	7.10398425392659	10.047152448412	9.4807835373777	-6.28669960657638	29.5	Two	LS
Chr4	1136574	1136785	Unsp	0.14758917050691198	0.502369668246445	0.34222222222222204	5.09975004453444	6.561385376505981	10.030890065671999	9.5424467871648	-6.643856189774719	29.0	Two	LS
Chr4	1143359	1143598	LINE	0.22154372384937196	0.556485355648536	-1.06923076923077	5.625346580359009	8.99347629040546	9.27723437647883	9.62236138173041	-5.9489208470284405	29.0	Two	LS
Chr4	1144043	1144910	LINE	0.290292271223815	0.5190311418685121	-0.18582887700534803	6.313239171558269	7.288913313819389	9.75083912926066	9.03835960572595	-6.211736709772	23.0	Two	LS
Chr4	1155758	1155965	LTR	0.398875	0.458937198067633	-0.954545454545454	5.09975004453444	5.6775286312381	10.4807913473957	9.05743875150226	-6.643856189774719	25.0	Two	LS
Chr4	1163670	1165289	LINE	0.0740614415505754	0.5515750463248921	-0.7492533067842408	7.516033155834941	6.72548434134932	9.01552553270821	9.120598065164712	-6.328655690904269	26.58823529411765	Two	LS
Chr4	1169436	1169912	LTR	0.17385479838709697	0.48739495798319304	0.0757142857142858	5.312094263902	7.3803916103762495	10.0510943457677	9.477655392006811	-5.90689059560852	29.0	Two	LS
Chr4	1171201	1171738	LTR	0.211538172043011	0.4487895716946	0.0843373493975904	5.45255895827219	8.15511197003104	10.058686293733802	8.95753744339927	-6.15046791173591	29.166666666666668	Two	LS
Chr4	1172646	1173082	LTR	0.15825890410958898	0.48853211009174297	0.32100938967136106	5.414482394855879	7.26729821068863	10.268563051562001	9.16037527025104	-6.203554613556991	25.4	Two	LS
Chr4	1173232	1175094	DNA	0.0042890139335477	0.5472610096670251	-0.657582179291311	6.25900421453398	7.176602820806379	8.26359598946026	9.00607174414412	-6.29586034354908	29.05263157894737	Two	LS
Chr4	1178568	1179035	LTR	0.158595950920245	0.501070663811563	-0.0481000481000481	5.23845559855887	6.06980318465112	9.472328590449038	9.656004080604099	-6.45287121695302	21.666666666666668	Two	LS
Chr4	1180593	1180863	Unsp	0.26560516853932603	0.559259259259259	-0.34444444444444394	5.3024636334589905	6.7524517797347	9.111154473769881	9.71270960083217	-5.844912021394731	18.25	Two	LS
Chr4	1180884	1181023	Unsp	0.19968721804511302	0.517985611510791	-1.16666666666667	5.03065184543009	6.9110214033377195	9.71889311719285	9.6449242715443	-6.39009959752894	9.333333333333334	Two	LS
Chr4	1181509	1181854	Unsp	0.176583571428571	0.6028985507246379	-0.7065637065637059	5.03065184543009	5.92102792403927	8.9317361523055	9.67784401422857	-6.42877193301816	10.25	Two	LS
Chr4	1182369	1183836	Unsp	0.19914884848484804	0.584185412406271	-0.723170731707317	5.03065184543009	6.79535442001986	8.30494485751038	9.568148002787481	-6.219682098953719	16.0	Two	LS
Chr4	1186767	1186907	Unsp	0.24581909090909101	0.65	1.9375	5.03065184543009	0.0	8.813143245039429	10.1334339163975	-6.1728244436382305	32.0	Three	LS
Chr4	1187086	1188152	Unsp	0.0423190361445783	0.642589118198874	-0.874014155712841	5.48452285384202	6.0583388806785194	7.935894613441611	9.86993104142401	-6.33945733707389	24.5	Two	LS
Chr4	1188126	1188810	Unsp	0.054019039301309996	0.595029239766082	-0.6001745962461811	7.74673028378842	5.973215666247491	8.42827451730372	9.80822395246975	-6.21751157496425	10.125	Two	LS
Chr4	1189506	1190696	Unsp	0.0602076730608841	0.640336134453781	-0.660429447852761	7.247646872186639	5.947456097073441	6.87967767027094	10.0442473132726	-6.2409540163548	15.5	Two	LS
Chr4	1190696	1196569	LTR	0.00384596420323326	0.532934131736527	-0.795034940489486	5.559326871861731	5.74426752312397	6.97284738037088	9.32416470939864	-6.37849297788096	15.45	Two	LS
Chr4	1196571	1196797	LTR	0.0088257268722467	0.455752212389381	-0.841269841269841	7.00470617216303	5.34744059470131	7.971106049009791	9.82333161685887	-6.072968874265291	23.666666666666668	Two	LS
Chr4	1206925	1208998	LINE	0.302471010248902	0.56825856246985	-0.5332500480492021	5.661907049714269	6.22372910202997	8.44313136970595	9.18443199820759	-6.236518381022769	4.666666666666667	Two	LS
Chr4	1209077	1210197	LINE	0.174982396475771	0.541964285714286	-0.43810748999428206	6.1504766334178695	8.09590773470672	8.118222067120039	8.926584819830891	-6.25956221392699	5.666666666666667	Two	LS
Chr4	1233088	1234818	DNA	0.289038506437768	0.49848024316109396	-0.30938697318007696	11.5847395874164	5.89408968642414	8.03677648170604	8.788641001951952	-6.3131661002184805	2.0	Two	LS
Chr4	1236437	1236617	LTR	0.236057074468085	0.422222222222222	-0.4166666666666671	5.03065184543009	0.0	8.59915920190038	8.952703230992551	-5.070816856429389	3.0	Three	LS
Chr4	1236711	1236853	LTR	0.126254509803922	0.514084507042254	1.3768115942029	5.03065184543009	0.0	9.65036002669932	9.22348900901627	-4.50083623120329	3.0	Three	LS
Chr4	1240541	1242099	LINE	0.256126896551724	0.564547206165703	-0.523479278074866	8.40716444477285	0.6439889337492709	6.83543929910007	8.97280674874393	-6.238336118081599	14.875	Three	LS
Chr4	1245251	1250086	LINE	0.0914517737630876	0.5615305067218199	-0.609500792004834	9.59085370893927	5.85920639843178	7.752622906171791	9.225243306676141	-6.277207572305	8.63265306122449	Two	LS
Chr4	1269209	1269377	DNA	0.264785628742515	0.505952380952381	0.0416666666666666	5.75981637527556	1.03502231182158	6.43017175296721	9.98174676015476	-6.643856189774719	10.0	Three	LS
Chr4	1272038	1274053	LINE	0.329980449101796	0.58562874251497	-0.530628109452736	6.80621678443267	6.009416970316731	6.775351553364691	9.30209797209662	-6.409822945436	9.904761904761905	Two	LS
Chr4	1284786	1284998	Unsp	0.0798130275229358	0.476415094339623	0.290909090909091	5.03065184543009	6.4760384511600995	10.3864333381785	9.3484483848201	-6.33306865249256	12.333333333333334	Two	LS
Chr4	1290081	1290200	LTR	0.259283203125	0.436974789915966	-0.25	7.64496342471192	1.31313402157055	10.2178187257884	9.73474927230836	-5.94341647163363	12.5	Three	LS
Chr4	1311805	1312341	Unsp	0.31494290613718395	0.483208955223881	-0.194047619047619	5.03065184543009	6.4719577228489396	9.782382485031869	8.73760013523098	-5.9431010526155905	15.0	Two	LS
Chr4	1312500	1312685	Unsp	0.346672020725389	0.49729729729729705	0.33333333333333304	5.03065184543009	8.03290794436685	10.4796113654163	8.893539005904161	-6.01209947757463	15.0	Two	LS
Chr4	1312786	1312935	Unsp	0.311290909090909	0.476510067114094	0.6507936507936509	5.03065184543009	0.0	10.465511311797199	9.14005599120392	-5.7693870718585805	15.0	Three	LS
Chr4	1313103	1313237	Unsp	0.262956115107914	0.567164179104478	2.35294117647059	5.03065184543009	2.3080240492642097	10.270363022438	9.65602698504313	-5.847775951039691	15.0	Three	LS
Chr4	1317144	1317526	LTR	0.32417192214111895	0.515706806282722	-0.11313131313131301	7.63389350680353	0.5458316072303371	7.745159374818409	9.31399116906445	-6.108362365317871	15.0	Three	LS
Chr4	1318096	1318275	Unsp	0.217848214285714	0.541899441340782	-0.17647058823529396	5.10471848180467	8.89609615654241	10.1017193329455	9.444445451203089	-6.25260925383063	15.0	Two	LS
Chr4	1327135	1327335	LTR	0.395982884615385	0.485	-0.0666666666666667	6.671800323077461	0.0	8.507537698995769	9.12279136959564	-6.41178482392131	15.0	Three	LS
Chr4	1336044	1337906	DNA	0.0048278563772776	0.5472610096670251	-0.6159510423404151	6.2992512280255	6.55195868308725	7.860710702588951	9.042123435090069	-6.207654872950081	28.1	Two	LS
Chr4	1339113	1341487	Unsp	0.263038313407344	0.5134793597304129	-0.22048274778784197	5.27188723911098	5.768962436674251	9.453622502977481	8.81465930063557	-6.285361522820129	15.0	Two	LS
Chr4	1341461	1344791	Unsp	0.24122537647414602	0.485285285285285	-0.27052655631156697	5.71939000030353	7.106295260070831	9.935841003143619	8.70306785349564	-6.33156786483284	15.0	Two	LS
Chr4	1346968	1347082	Unsp	0.21511	0.5	-0.0833333333333333	5.03065184543009	7.150723362283389	10.7424602784923	9.621712879345608	-6.643856189774719	15.0	Two	LS
Chr4	1347082	1347291	Unsp	0.25719794520547895	0.521531100478469	0.606060606060606	5.03065184543009	6.294538481817599	10.596106811734	9.53040675879664	-6.4808506022722	15.0	Two	LS
Chr4	1347387	1348931	LINE	0.31442609991235804	0.49100719424460404	-0.621264700212069	5.03065184543009	7.10314935473729	9.82690489741408	9.05093200533938	-6.22054053238755	15.0	Two	LS
Chr4	1348949	1352261	LINE	0.271524813710879	0.506038647342995	0.0466767440795199	7.20350061155089	7.021902246305809	9.45750763876525	8.91562355909867	-6.30662334808143	15.0	Two	LS
Chr4	1354034	1359950	LTR	0.109617650220772	0.53970080552359	-0.704031713900135	11.221686484804001	5.91552482648275	7.311188044618031	9.36271214457744	-6.35613476457327	31.6	Two	LS
Chr4	1363333	1366672	Unsp	0.0209032734889288	0.52680443246481	-0.7772560613306669	6.29632330177539	6.6414913606391295	9.50710815899624	9.57436215500522	-6.273383224638179	5.705882352941177	Two	LS
Chr4	1366645	1369083	Unsp	0.0502278510028653	0.525020508613618	-0.5621794871794871	6.16295051506516	6.47221760221176	9.20857200626657	9.15624679711964	-6.293322473699809	8.08	Two	LS
Chr4	1379445	1379662	Unsp	0.353776197183099	0.557603686635945	-1.07	5.03065184543009	7.688037843859401	9.70404134629455	9.44973717736649	-6.31901649946746	3.3333333333333335	Two	LS
Chr4	1380280	1384059	Unsp	0.0355126747560011	0.543794654670548	-0.641926824418373	7.3482083067201	6.389342093682621	8.3047917169833	9.27470044320293	-6.271939067763469	5.3076923076923075	Two	LS
Chr4	1384056	1385498	Unsp	0.0257164738292011	0.5707350901525661	-0.5926625728231779	5.24744857759222	5.63328333538149	8.20465794537219	9.47949417571875	-6.24742813155979	9.533333333333333	Two	LS
Chr4	1388135	1389763	Unsp	0.0506278292682927	0.640663390663391	-0.588342967244701	5.09975004453444	4.56159115024995	7.49419138297733	9.69564265212246	-6.2658282054933	8.176470588235293	Two	LS
Chr4	1389822	1390496	Unsp	0.0484441333333333	0.602373887240356	-0.937837837837838	6.71061021749175	6.324498496886211	7.786958990446419	9.80875743853261	-6.38666551791528	5.428571428571429	Two	LS
Chr4	1391197	1393876	Unsp	0.0153812168719672	0.609555804404629	-0.758356510745891	7.50091530786971	5.99713678440485	7.0092783342618095	9.968304334913869	-6.05138575472472	4.571428571428571	Two	LS
Chr4	1397907	1398557	Unsp	0.11484138972809699	0.47846153846153794	-0.476984126984127	5.03065184543009	7.404785186226269	10.729992747027401	9.75990033158096	-6.350510259048481	8.0	Two	LS
Chr4	1398547	1398840	Unsp	0.08536302325581402	0.5324232081911261	-0.36140350877192995	5.03065184543009	7.338127301529809	10.3088011442364	9.74833904259701	-6.18442457113743	8.0	Two	LS
Chr4	1398852	1399775	Unsp	0.109422863247863	0.533044420368364	-0.421472937000887	5.2433495225700995	5.872310729978139	9.992346090982679	9.650064442787949	-6.277474496440001	8.0	Two	LS
Chr4	1402550	1402791	Unsp	0.0954565843621399	0.539419087136929	-0.506631299734748	5.03065184543009	1.67359752899857	9.696705324042581	9.59187079195364	-6.251896250220259	9.666666666666666	Three	LS
Chr4	1410836	1411301	LINE	0.234747730192719	0.5311827956989249	-0.915360501567398	5.03065184543009	0.46215901418952204	9.13608641523754	9.363754746581698	-6.42051510920274	8.5	Three	LS
Chr4	1428385	1434945	Unsp	0.0252157446808511	0.5513719512195121	-0.76475487115022	7.3203643117639805	6.4127441396583	8.2309931038663	9.48049667349042	-6.27634959559615	9.940298507462687	Two	LS
Chr4	1437398	1439286	Unsp	0.0683301985370951	0.526483050847458	-0.37286821705426393	5.1352948761526696	6.782648740734951	9.17493899773235	9.38869777552939	-6.30126272794739	6.9	Two	LS
Chr4	1443031	1446044	Unsp	0.10488759075907599	0.580816461998009	-0.645900974025974	6.69640578837357	6.44059585194443	8.107443994390039	9.71272981526489	-6.2525681899563805	8.03225806451613	Two	LS
Chr4	1446097	1446726	Unsp	0.0399875118110236	0.650238473767886	-0.47368421052631604	6.99480516614825	5.08411153739464	7.00043773121616	10.0596804273624	-6.205680898775669	10.625	Two	LS
Chr4	1447422	1448106	Unsp	0.0526400583090379	0.599415204678363	-0.6625	7.80344091631561	6.15558995805065	8.43900980997306	9.84697565082583	-6.39557223530625	6.125	Two	LS
Chr4	1448116	1449138	Unsp	0.04611965217391299	0.645792563600783	-0.735869565217391	5.42798299967553	6.03392845063084	7.8275456493943505	9.98155078020241	-6.1250357246645795	7.181818181818182	Two	LS
Chr4	1449331	1449512	Unsp	0.26280456410256403	0.674033149171271	0.842105263157895	5.03065184543009	0.980664207903963	8.77920416198389	10.024879906493	-6.44017888452419	6.333333333333333	Three	LS
Chr4	1449570	1449694	Unsp	0.257012066115702	0.693548387096774	-1.25	5.03065184543009	0.0	8.21304065416131	10.3387628762531	-6.11284777984129	6.5	Three	LS
Chr4	1452427	1453769	Unsp	0.18700206921944	0.582712369597616	-0.715702947845805	5.03065184543009	7.35919684358244	8.46022403057575	9.574179744760189	-6.22407597904766	8.714285714285714	Two	LS
Chr4	1454409	1454754	Unsp	0.178929487179487	0.6028985507246379	-0.733590733590733	5.03065184543009	5.23539350619178	8.656564733308361	9.685950581881269	-6.33385078393434	10.25	Two	LS
Chr4	1455242	1455381	Unsp	0.19968721804511302	0.517985611510791	-1.0	5.03065184543009	6.86462234931386	9.712338234734279	9.852171271757161	-6.643856189774719	7.5	Two	LS
Chr4	1455402	1457798	Unsp	0.0922789375	0.545075125208681	-0.677929022848809	6.54595191033346	5.03339919514329	8.6757894544776	9.417084836150698	-6.31954356828425	9.25	Two	LS
Chr4	1459197	1459466	Unsp	0.244546260162602	0.531598513011152	-0.6736111111111109	5.03065184543009	7.7510939731246	9.660849373412251	9.481524193962711	-6.10277499603649	14.0	Two	LS
Chr4	1459665	1460169	Unsp	0.205247058823529	0.49801587301587297	-0.0933333333333334	5.20482771781376	6.86596538839231	9.76231425152335	9.1426440897863	-6.41351762909016	17.0	Two	LS
Chr4	1471223	1471410	Unsp	0.21850073170731696	0.5401069518716579	-0.21078431372548997	5.100184687091179	7.218103132603019	9.331790894588462	9.99582614808251	-6.3197493453554	6.333333333333333	Two	LS
Chr4	1471418	1473871	Unsp	0.114443174603175	0.530370974317163	-0.601634997790543	5.37914008809626	6.057353752308741	8.63337338146587	9.17635682602866	-6.358348383395259	16.04	Two	LS
Chr4	1473844	1477182	Unsp	0.0314217060760251	0.529958058717795	-0.810474852325515	5.95607959609763	5.83743206276099	8.89735942392109	9.17225868815815	-6.35857399567545	12.823529411764707	Two	LS
Chr4	1512585	1512782	Unsp	0.16912	0.598984771573604	0.7619047619047621	5.03065184543009	8.70276249997946	9.669220052279249	9.83335809876397	-6.176416992536059	0.0	Two	LS
Chr4	1873220	1874414	LTR	0.44600172754195505	0.5710479573712262	0.182231404958678	5.96210630180348	6.229180865776651	6.59610575750085	8.981237681697891	-6.34170227794096	13.384615384615385	Two	Core
Chr4	1874610	1874807	Unsp	0.41232536912751705	0.614213197969543	-0.264367816091954	5.312094263902	5.456408734336491	5.752150078080669	9.74419169687776	-6.155665578156	0.0	Two	Core
Chr4	2293762	2293892	Unsp	0.08531804511278199	0.5	0.36309523809523797	5.23354388456185	6.4129194528513205	6.610557858043751	9.752433855118161	-6.05889368905357	0.0	Two	Core
Chr4	2312003	2312126	Unsp	0.088821811023622	0.51219512195122	0.7	5.32244454412134	0.0	7.890107215579129	9.68100567708517	-6.26400811895818	0.0	Three	Core
Chr4	2319097	2319733	Unsp	0.10196825037707402	0.275157232704403	1.3932584269662902	5.03065184543009	7.73965896687453	8.33345917556793	6.362105403047369	-4.44312514155124	7.375	One	Core
Chr4	2319733	2321887	LTR	0.0665337332718043	0.19962859795728896	1.2917569117085	5.03065184543009	8.56451102278153	8.457952414340099	4.8772993257360095	-4.874237378289769	15.409090909090908	One	Core
Chr4	2321894	2325098	Unsp	0.233860497667185	0.24157303370786498	1.3189189826273502	5.03065184543009	8.28300878110973	8.14044817390761	5.88252521773719	-3.91425642523157	18.90909090909091	One	Core
Chr4	2325098	2330021	LTR	0.14763540540540498	0.5171643306926671	-0.41284019995425897	5.30060340585908	7.0899229299133095	7.69400866600823	9.0525119247758	-6.2895610413254905	18.50980392156863	Two	Core
Chr4	2330021	2330331	Unsp	0.248940911949686	0.248387096774194	1.3863636363636398	5.09975004453444	9.031273135932329	8.37001142933455	6.11019892714715	-5.74694968273883	18.75	One	Core
Chr4	2330933	2335514	Unsp	0.214255335968379	0.23968565815324203	1.3672263868066001	5.03065184543009	8.492860289699559	8.51569809489833	5.70887543960749	-4.223257216831181	19.319148936170212	One	Core
Chr4	2335529	2336424	Unsp	0.25799894444444393	0.26033519553072604	1.2853317102860602	5.03065184543009	8.85036197027988	8.41718184090924	6.53076239052222	-4.19532554455385	16.2	One	Core
Chr4	2336260	2339245	LTR	0.0458807409948542	0.20988934993084402	1.33791666666667	5.03065184543009	8.57478563167291	8.42739568446955	5.57557396549451	-3.3399673866943105	9.612903225806452	One	Core
Chr4	2339249	2339894	Unsp	0.111190830860534	0.29922480620155	1.38722331185206	5.100184687091179	8.297770607805031	8.65733588130359	6.73326427024978	-4.2726813429772905	9.571428571428571	One	Core
Chr4	2340424	2340604	LTR	0.277250434782609	0.29444444444444395	1.7391304347826102	5.03065184543009	9.82244637882185	9.277205603512881	7.4967487363819805	-5.62920941381032	15.0	One	Core
Chr4	2356985	2357197	Unsp	0.16326128440367002	0.504716981132076	0.281818181818182	5.03065184543009	9.04969414153073	9.38930359106914	9.199463532664948	-5.924408356866549	2.0	Two	Core
Chr4	2377928	2378111	Unsp	0.33644885416666703	0.48087431693989097	0.512605042016807	5.03065184543009	0.9728229974506821	8.96352355439423	8.86946474884097	-6.282199786823901	0.0	Three	Core
Chr4	2462849	2463049	Unsp	0.15688767123287697	0.575	0.166666666666667	5.03065184543009	0.0	9.28641012706608	9.44935610828114	-6.05809107704906	0.0	Three	Core
Chr4	2536310	2537214	LTR	0.389286548956661	0.503236245954693	-0.10672188595094001	5.2433495225700995	5.74888013740368	7.07769595972941	9.194881001205	-6.37872120278565	7.0	Two	Core
Chr4	2557818	2557933	Unsp	0.302244628099174	0.617391304347826	-0.25	5.66166293404887	0.0	6.5703074002792	9.82930718554329	-6.359502060345339	0.0	Three	Core
Chr4	2884653	2885602	LTR	0.24738948660714302	0.170236753100338	1.09979550102249	5.03065184543009	8.318571034356768	7.89082778178758	4.48241539857027	-5.14909149802515	30.0	One	Core
Chr4	2885602	2885786	LTR	0.19617553191489398	0.21195652173913002	1.48148148148148	5.03065184543009	9.64810200376761	8.034474107943149	6.52507280147212	-6.643856189774719	25.5	One	Core
Chr4	2885786	2904530	LTR	0.10158771098967802	0.24557836958731397	1.3311240483654299	5.03065184543009	9.83821435609275	7.80087759747952	6.85126857940633	-5.13492480572472	20.084656084656086	One	Core
Chr4	2887810	2888445	Unsp	0.10660090361445801	0.31811023622047196	1.38421768707483	5.03065184543009	9.978900170181731	7.59098950710416	7.14197145058063	-6.08637442547568	6.428571428571429	One	Core
Chr4	2888445	2890628	LTR	0.0736643156424581	0.223159868729489	1.21766707920792	5.03065184543009	8.814098916330641	8.058559955021959	5.7036469886586705	-5.67050858196679	16.0	One	Core
Chr4	2888858	2889625	Unsp	0.287563174603175	0.251629726205997	1.3252252252252301	5.03065184543009	8.76606006796259	8.12908746335558	5.87078710338295	-6.643856189774719	9.333333333333334	One	Core
Chr4	2890698	2891399	LTR	0.181292304347826	0.33666191155492203	1.91233651466949	5.03065184543009	10.4219299007075	8.25508082934422	8.05112910949813	-5.43342963944706	23.5	One	Core
Chr4	2891397	2897924	LTR	0.30695755794058194	0.32441263419947103	1.39163483096519	5.03065184543009	10.0674300614239	7.62483929972602	7.51071838151734	-5.32550685335983	25.80597014925373	One	Core
Chr4	2897924	2900840	LTR	0.0462710892480675	0.227771873893022	1.32219309742246	5.03065184543009	9.80139009084984	7.68625859662804	6.104546456458559	-5.01171012787089	9.4	One	Core
Chr4	2900877	2901515	Unsp	0.10206304216867501	0.316614420062696	1.4023268398268403	5.03065184543009	10.8785273171462	7.63314991152926	7.115896195904679	-5.9154441485747	7.0	One	Core
Chr4	2904530	2912101	LTR	0.0943873201293452	0.174837486457205	1.2067375840828798	5.03065184543009	9.642120078857381	7.40224525931609	4.64166243322323	-5.375750794393509	29.01298701298701	One	Core
Chr4	2912101	2922761	LTR	0.0880480019398642	0.24125647668393801	1.35355181880577	5.03065184543009	9.92502578803189	7.45308525503782	5.45118612899875	-5.84339618589507	27.214953271028037	One	Core
Chr4	2913017	2920587	LTR	0.0968161450020289	0.18641304347826101	1.21832952033813	5.03065184543009	9.774740200436689	7.40065180405093	4.83446420555629	-5.99869890713482	29.06578947368421	One	Core
Chr4	2922761	2930332	LTR	0.102152544235925	0.22794018590866197	1.28646238983398	5.03065184543009	10.1159702912971	7.316391072827849	6.086556896525071	-5.77112230210372	24.155844155844157	One	Core
Chr4	2930332	2930997	LTR	0.0988402548725637	0.22255639097744398	1.1939775910364099	5.03065184543009	10.7176247820692	8.10144163238153	6.2539733696297	-5.8991132450168005	26.142857142857142	One	Core
Chr4	2930997	2938567	LTR	0.0897630196818549	0.19170844059070602	1.19557476548406	5.03065184543009	9.95707314616031	7.40085001531837	5.02542802622256	-6.01973471221276	29.83116883116883	One	Core
Chr4	2938567	2941284	LTR	0.101830595054096	0.18862042088854197	1.23737145723602	5.03065184543009	9.97227153165404	7.4558460160590005	5.03820889123727	-5.71717286741765	28.428571428571427	One	Core
Chr4	2941268	2948837	LTR	0.144965580013504	0.302063535161553	1.40699804755409	5.03065184543009	10.1951893030037	7.70529685522074	7.0445359187352405	-5.71485695867586	19.948051948051948	One	Core
Chr4	2948885	2953002	LTR	0.12140231738035301	0.23076923076923103	1.2892293588718302	5.03065184543009	9.95619167006806	7.6767102744787	6.085866569835781	-5.536670681576071	27.046511627906977	One	Core
Chr4	2953002	2958563	LTR	0.0931466907384004	0.199673558215452	1.2174520326398601	5.03065184543009	9.910071570634551	7.50382732970033	5.06222427690463	-5.74406117210168	27.517857142857142	One	Core
Chr4	2958563	2961803	LTR	0.0870267281105991	0.159876543209877	1.1782706045420601	5.03065184543009	9.53247219858776	7.48080326773386	4.39057633397828	-5.89216908990175	31.0	One	Core
Chr4	2961805	2965224	LTR	0.0917679358068316	0.270085976875185	1.42085162655382	5.173816680909019	10.034536524595	7.828891737988019	6.609062864965731	-5.736544606386321	19.228571428571428	One	Core
Chr4	2965249	2966856	LTR	0.11206529562982001	0.24854368932038798	1.3111629262605702	5.03065184543009	9.85998983942923	7.524880675762381	6.363026634610901	-5.75509812995286	27.11764705882353	One	Core
Chr4	2966856	2976777	LTR	0.10124332379438301	0.30649792619376803	1.4572580645161297	5.173816680909019	10.156479049747901	7.91169785892328	7.512344638250071	-5.06213246700846	20.76	One	Core
Chr4	2974279	2974755	LTR	0.051792828685259	0.51890756302521	-0.37866224433388596	5.03065184543009	9.51947837288432	8.1098052267493	9.344911871243	-6.3967799633821	16.333333333333332	Two	Core
Chr4	2976777	2986718	LTR	0.13833894191080198	0.37370485866613	1.44371446986727	5.03065184543009	10.5588196818651	7.884509107393599	7.95313229643283	-5.101593585430099	23.22772277227723	One	Core
Chr4	2986718	2987039	LTR	0.112659577039275	0.4125	1.3969696969696999	5.03065184543009	10.4289538482561	7.52251623214259	8.52900641714657	-4.71281644479864	20.5	One	Core
Chr4	2987041	2993011	LTR	0.0895697832712496	0.21868618107556198	1.2695088213801	5.03065184543009	9.69310749096493	7.835201595241981	5.640251402908571	-5.630447013859531	22.065573770491802	One	Core
Chr4	2993011	2996969	LTR	0.101239312901631	0.266799402687904	1.2975577557755802	5.03065184543009	9.4373936870349	7.70806404044407	8.12336636146162	-5.4782083780674	27.9	One	Core
Chr4	2993089	2994951	DNA	0.0032113290460878898	0.5477980665950589	-0.6201485148514849	5.03065184543009	7.77321599480695	7.68716137826556	8.929255306515321	-6.25984775987304	31.7	Two	Core
Chr4	2997068	3001864	LTR	0.099499540546263	0.263740945888368	1.32360444177671	5.03065184543009	10.2361042032492	7.57092546673598	6.594077779169849	-5.545900974706741	22.163265306122447	One	Core
Chr4	3001864	3008673	LTR	0.336317457004263	0.235129975033045	1.20111577074597	5.03065184543009	10.0356848573427	7.6819635344822	6.178315264230441	-5.622859792888139	12.36231884057971	One	Core
Chr4	3008673	3010655	LTR	0.11131546494281501	0.237253912165573	1.2706270627062701	5.03065184543009	10.4800009380874	7.776223709085901	6.23140322112195	-5.39215801776883	22.666666666666668	One	Core
Chr4	3010655	3015887	LTR	0.0996610497237569	0.19611342454888	1.23039074939312	5.03065184543009	9.943078457201619	7.50647781285037	5.23455024201632	-5.754290163828031	29.150943396226417	One	Core
Chr4	3015887	3017960	LTR	0.13938478260869597	0.23416117587430302	1.22938890851289	5.03065184543009	10.19191885426	7.668481568112531	6.306663161970531	-5.58011672069684	30.636363636363637	One	Core
Chr4	3018093	3018252	LTR	0.12288576687116601	0.257861635220126	1.19130434782609	5.03065184543009	11.0886451602868	8.04154639559672	7.52659387314496	-6.643856189774719	29.333333333333332	One	Core
Chr4	3018252	3019564	LTR	0.0803556904400607	0.214176829268293	1.1780269058296	5.03065184543009	10.147247860802901	7.43888127629406	5.76250779805655	-5.44303718038663	20.071428571428573	One	Core
Chr4	3019563	3019711	LTR	0.19707337423312898	0.40540540540540504	2.9	5.03065184543009	11.6460141552738	8.69979138800649	7.590285126842329	-6.643856189774719	18.666666666666668	One	Core
Chr4	3019810	3028811	LTR	0.10682231520223201	0.21678321678321696	1.24034831323834	5.03065184543009	10.0780170084193	7.699270855760001	6.191069747783491	-6.34283219805967	21.54945054945055	One	Core
Chr4	3020438	3028009	LTR	0.108678122990354	0.25326511377406796	1.33055118480073	5.03065184543009	10.0901032084721	7.7720310972648505	6.26436700697277	-5.88625608672245	21.792207792207794	One	Core
Chr4	3028867	3032851	LTR	0.0948913296227582	0.25753339546443	1.3113445378151298	5.10471848180467	10.2612944824153	7.615417573097451	6.64465824265336	-5.56472753999019	21.024390243902438	One	Core
Chr4	3032065	3032732	Unsp	0.114417341040462	0.307346326836582	1.46984478935698	5.03065184543009	10.9132956411267	7.3650472044489	7.426643082300361	-6.37492118250125	13.875	One	Core
Chr4	3032851	3036212	LTR	0.0976712991656734	0.253092006033182	1.24950980392157	5.173816680909019	10.3765534826351	7.49287250689087	6.72977776295294	-5.363748270581991	23.285714285714285	One	Core
Chr4	3036215	3037108	LTR	0.0897977433628319	0.217245240761478	1.43144368858655	5.03065184543009	10.3507433780418	7.46055194212971	6.317612206240259	-5.71717286741765	19.6	One	Core
Chr4	3037108	3038495	LTR	0.134788330914369	0.26773957571324103	1.3474609891563099	5.03065184543009	10.32638132869	8.213942457185428	6.4928719447385	-5.06694783441509	21.857142857142858	One	Core
Chr4	3038495	3045670	LTR	0.0979941104987989	0.228737753798097	1.27555706032969	5.03065184543009	9.82453582655595	7.4599755678554205	5.74460574501442	-5.68975902755336	20.65753424657534	One	Core
Chr4	3045670	3052253	LTR	0.10422656714108901	0.234654234654235	1.2743628291975502	5.03065184543009	9.953312158142401	7.83922186380138	6.00175357923928	-5.67969276041545	22.895522388059703	One	Core
Chr4	3052253	3052590	LTR	0.10531691876750698	0.270029673590504	1.6331168831168799	5.03065184543009	10.902526482231	7.70480759199453	6.466250371248639	-6.643856189774719	12.25	One	Core
Chr4	3052593	3052928	LTR	0.15426686956521699	0.11940298507462699	1.171875	5.03065184543009	10.0406907874258	7.3949740258020595	5.14824735510108	-6.643856189774719	34.2	One	Core
Chr4	3053012	3053153	Unsp	0.0828381632653061	0.28368794326241104	1.2571428571428602	5.03065184543009	11.392950680926	8.65792077160621	7.44247678206645	-5.131957151243291	25.0	One	Core
Chr4	3053153	3070431	LTR	0.0924583521560575	0.247729149463254	1.2828092713144599	5.03065184543009	9.74302784853535	7.80632866015635	5.803786676364571	-5.368140708259951	23.729885057471265	One	Core
Chr4	3062351	3069920	LTR	0.0972216888888889	0.17878911011783802	1.21335832675612	5.03065184543009	9.125535220908038	7.723480183074981	4.6897185324646395	-5.86838942622561	27.12987012987013	One	Core
Chr4	3070431	3070931	Unsp	0.107547709923664	0.292	1.34343434343434	5.09975004453444	9.899333175438061	8.20655331449059	7.171702826056941	-4.878321443411751	1.8333333333333333	One	Core
Chr4	3070931	3071191	LTR	0.125908951310861	0.226923076923077	1.2392344497607701	5.03065184543009	8.16905212269908	8.58370639036641	6.09656604221534	-6.643856189774719	7.0	One	Core
Chr4	3264955	3265112	Unsp	0.229503448275862	0.643312101910828	-1.125	5.03065184543009	1.6987728053666002	8.74501793622198	9.534124816723631	-6.02314366410437	0.0	Three	LS
Chr4	3265095	3265277	Unsp	0.185149	0.543956043956044	-0.00526315789473686	5.48216903851909	9.15037090073945	8.42914937574636	9.70444445516098	-6.33373929290445	0.0	Two	LS
Chr4	3303483	3303679	DNA	0.18055472361809	0.505102040816326	0.747619047619048	5.2433495225700995	0.0	6.80533954243714	10.3751889987832	-6.391876972449929	0.0	Three	Core
Chr4	3337647	3337893	DNA	0.271209333333333	0.38211382113821096	0.595238095238095	5.03065184543009	5.674099603462929	10.3702735006191	9.01174713537111	-6.00210293646379	0.0	Two	LS
Chr4	3349257	3349928	LTR	0.243895049833887	0.49211356466877	0.19249530956848	6.815711483298041	8.70136670945283	8.66705901174899	8.68698383004278	-4.833696104397231	23.375	Two	Core
Chr4	3350029	3350170	LTR	0.15984142857142902	0.531914893617021	0.8125	6.23527891652696	8.97755230520824	9.85303787292062	9.35737170298133	-6.643856189774719	26.0	Two	Core
Chr4	3352702	3352819	Unsp	0.0781088235294118	0.46153846153846206	1.7352941176470602	5.81687692404999	9.2447762744391	9.66976776531464	9.925954461995321	-5.903022778168809	1.0	Two	Core
Chr4	3353180	3355042	DNA	0.0042890139335477	0.5472610096670251	-0.657582179291311	6.27472037546738	7.24893021671535	8.11771636826895	8.98010579012351	-6.23269686426267	27.75	Two	Core
Chr4	3355042	3355200	Unsp	0.215111479289941	0.44303797468354406	-0.844444444444444	5.52227501206387	7.05185544847266	8.46587148739273	9.710494147237199	-6.643856189774719	19.5	Two	Core
Chr4	3361384	3362000	Unsp	0.16864973143759898	0.279220779220779	1.28245222139489	5.03065184543009	8.795353445555179	8.94806019016611	7.399201713623261	-3.8400286412124505	17.285714285714285	One	Core
Chr4	3362094	3362740	Unsp	0.1023078125	0.30650154798761603	1.36376686764284	5.03065184543009	6.82602241902817	9.060438123071341	7.48751979876253	-4.1725504708491306	14.125	One	Core
Chr4	3362794	3363088	Unsp	0.236772727272727	0.26870748299319697	1.01923076923077	5.03065184543009	7.07624755294741	8.88388393989798	7.76651651803767	-5.74694968273883	11.0	One	Core
Chr4	3366265	3367573	LTR	0.0550991060606061	0.217889908256881	1.4029810298103003	5.03065184543009	8.63686016836621	8.8131339376764	6.063939961489691	-4.274622380109	18.214285714285715	One	Core
Chr4	3367565	3367861	Unsp	0.11505068259385699	0.307432432432432	0.7852564102564101	5.03065184543009	9.15926577743034	9.651027306725789	7.00923181478546	-2.9909168952375604	26.0	One	Core
Chr4	3367951	3368584	Unsp	0.100089773755656	0.279620853080569	1.34509803921569	5.03065184543009	9.328802869482779	9.1559486582073	6.181824739975459	-5.01256463799809	9.142857142857142	One	Core
Chr4	3368584	3373684	LTR	0.0500620758086922	0.19992011184341896	1.2596302003081699	5.03065184543009	8.21074424325036	8.74343631604718	5.174209259529531	-3.8628125448329707	18.903846153846153	One	Core
Chr4	3373721	3374366	Unsp	0.13134808320951	0.25116279069767394	1.3315602836879399	5.03065184543009	8.06404083561139	9.029157344143359	6.845766687806929	-5.21361628385221	28.714285714285715	One	Core
Chr4	3374355	3374704	Unsp	0.12098622950819699	0.24928366762177698	1.18755980861244	5.03065184543009	7.77480122745541	9.5130842310076	7.095169076771491	-4.2249036404925	27.2	One	Core
Chr4	3378563	3378812	DNA	0.20747465116279104	0.449799196787149	-0.34615384615384603	5.09975004453444	6.059673832683151	9.68962527238708	9.75164506158782	-6.30362727814442	28.0	Two	Core
Chr4	3383030	3388903	LTR	0.00365665896843726	0.533127293799498	-0.797188626658825	5.219976054820321	5.783871533046731	6.974564909295441	9.3688041011636	-6.2286422856397	16.45	Two	LS
Chr4	3388998	3389191	Unsp	0.206169764150943	0.549222797927461	-0.3208556149732619	5.58950071763463	1.49828954749452	8.3564245175171	10.2486007001619	-6.643856189774719	26.0	Three	LS
Chr4	3403194	3403385	Unsp	0.229434278846154	0.518324607329843	1.21367521367521	5.829947910585671	7.36755933086519	10.6850698692335	9.36424761469468	-5.987757340275429	6.0	Two	LS
Chr4	3404471	3404683	Unsp	0.19696724137931002	0.547169811320755	1.33014354066986	5.48084779353539	6.8937505312009595	10.6096974012884	9.613887421935571	-6.1717877454595005	0.0	Two	LS
Chr4	3425872	3426054	Unsp	0.15146592592592598	0.49450549450549497	-0.34821428571428603	5.03065184543009	0.9767272689921491	8.70564574610312	10.0854717721129	-6.37937111007221	0.0	Three	Core
Chr4	3455714	3455921	Unsp	0.308521238938053	0.48792270531401	0.7481481481481479	5.03065184543009	0.8879313003271491	10.3763366265371	9.33214829681132	-6.32047887825029	0.0	Three	Core
Chr4	3456175	3456326	Unsp	0.298587636363636	0.52317880794702	0.288888888888889	5.3430986292814495	0.0	10.1107987168705	9.14115282213076	-6.26045435598455	0.0	Three	Core
Chr4	3459673	3460007	DNA	0.21286967164179102	0.43113772455089794	0.115384615384615	5.47842728560663	0.6098948397172139	7.666140791641411	9.14462062896049	-4.44363258779937	0.0	Three	Core
Chr4	3461996	3462232	Unsp	0.169818801652893	0.466101694915254	-0.329831932773109	6.11990484863627	6.56895812304899	7.76226727778289	9.76906920444291	-5.88222173959381	0.0	Two	Core
Chr4	3487843	3487993	LTR	0.287149342105263	0.62	1.76190476190476	5.17425132346575	1.1216041168304298	8.53654085159953	10.423015813572	-6.16332539119785	0.5	Three	Core
Chr4	3497201	3497363	Unsp	0.229439608938547	0.537037037037037	0.5	5.03065184543009	7.09835312664986	8.71842500675381	9.47873676107001	-6.06247802640261	0.0	Two	Core
Chr4	3532525	3539366	LTR	0.0684062636244732	0.5195146908346729	-0.332703137570394	9.48754676397899	6.9473687276948795	7.77014243594784	9.13865969330265	-6.20518363164229	16.652173913043477	Two	Core
Chr4	3588330	3588458	Unsp	0.0866662595419847	0.5	0.0416666666666666	5.03065184543009	7.67100293201151	8.79369613675288	10.3559275161736	-6.32407762849717	0.0	Two	Core
Chr4	3602596	3602725	Unsp	0.0686781954887218	0.511627906976744	0.32163742690058506	5.100184687091179	2.9715957947757996	7.95487754352126	10.08112018533	-6.643856189774719	0.0	Three	Core
Chr4	3611289	3611497	Unsp	0.158316814159292	0.572115384615385	-0.0213903743315509	6.44601315128495	8.411134640146651	9.824647473171279	9.847674757330779	-6.345332699222309	0.0	Two	Core
Chr4	3630183	3630981	LTR	0.3418291566265061	0.513321492007105	-0.47181467181467207	6.33030298417604	4.94941125623945	8.18129283815401	9.46696750304467	-6.23454877488758	0.0	Two	LS
Chr4	3654652	3654788	LTR	0.216458163265306	0.580882352941177	-0.5714285714285711	5.03065184543009	1.84625792325848	8.77599477909201	9.856653815221529	-6.643856189774719	0.0	Three	LS
Chr4	3654788	3654911	Unsp	0.328972272727273	0.479674796747967	-0.788461538461539	5.03065184543009	9.598185536076722	9.11402926562167	10.0071505034696	-6.643856189774719	0.0	Two	LS
Chr4	3655484	3662973	LTR	0.0891536388999601	0.234019791388072	1.2540821110441398	5.1352948761526696	8.70366165743002	9.46376331170467	6.11974361241754	-5.1983776466371205	15.868421052631579	One	LS
Chr4	3676764	3676989	DNA	0.22818926940639303	0.36	0.0290909090909093	5.03065184543009	6.53160778520335	9.92162683280867	8.9677851976354	-6.643856189774719	0.0	Two	Core
Chr4	3682765	3682920	Unsp	0.22957834319526602	0.535483870967742	-0.18055555555555605	5.20439307525702	0.0	9.55864815588744	9.98205501988703	-5.84717476923157	0.0	Three	Core
Chr4	3689786	3689892	Unsp	0.217357117117117	0.47169811320754707	-0.0769230769230769	5.03065184543009	8.194816524107441	10.556088474140099	9.87419336318765	-6.031172931495121	0.0	Two	Core
Chr4	3689917	3690100	Unsp	0.164422	0.551912568306011	0.5	5.03065184543009	0.9728229974506821	10.3342257498863	9.62658198865242	-5.60508181754965	0.0	Three	Core
Chr4	3690476	3690615	Unsp	0.268126506849315	0.553956834532374	0.923076923076923	5.100184687091179	7.599778396967451	8.91771394603129	9.74018703336669	-6.643856189774719	0.0	Two	Core
Chr4	3694971	3695171	Unsp	0.233539814814815	0.565	-0.15	5.09975004453444	0.9110691610691891	7.188053202509401	9.76592221462233	-6.424512790441541	0.0	Three	Core
Chr4	3701434	3702056	Unsp	0.14388117103235698	0.31189710610932503	1.18243243243243	5.03065184543009	8.11337906051172	10.5712093532903	7.614302090964269	-5.3056404398824295	10.142857142857142	One	LS
Chr4	3718525	3718722	Unsp	0.401836213592233	0.5025380710659899	-0.773504273504273	5.173816680909019	1.4791422260957	9.324520466347929	9.239551817274151	-6.14703627440874	0.0	Three	Core
Chr4	3720826	3720951	Unsp	0.104350775193798	0.52	1.26190476190476	5.03065184543009	8.10388890267867	9.50779991001516	9.538430570723051	-6.344711490531651	0.0	Two	Core
Chr4	3770617	3770798	Unsp	0.270617948717949	0.530386740331492	-0.7575757575757579	5.47798066076158	0.0	9.052872344514439	9.49599760410534	-6.28580866908071	8.0	Three	LS
Chr4	3770903	3771084	Unsp	0.209332713567839	0.546961325966851	0.0166666666666668	5.30060340585908	7.292227720069469	9.772739096661	9.49599760410534	-5.732907377591849	0.5	Two	LS
Chr4	3782582	3784444	DNA	0.0032113290460878898	0.5477980665950589	-0.6201485148514849	7.502626184575879	7.26756167390067	7.54559294041506	9.072731894851481	-6.27200426859442	28.7	Two	Core
Chr4	3867025	3867156	Unsp	0.0754893333333333	0.5114503816793889	0.10526315789473699	5.100184687091179	6.71117294172009	8.26607282074946	10.0337783833942	-6.643856189774719	0.0	Two	Core
Chr4	3957673	3957897	Unsp	0.334111189427313	0.5758928571428571	-1.25757575757576	10.195243267225699	6.75292068991084	8.876117769331382	9.87226371953202	-6.07975229395123	0.0	Two	Core
Chr4	3983157	3983401	Unsp	0.421305829959514	0.22950819672131098	1.3324675324675301	5.03065184543009	9.36160830302156	9.893652640579221	7.07617518291422	-4.11731037527889	6.25	One	Core
Chr4	3983407	3983983	LTR	0.114008146911519	0.269097222222222	1.43758434547908	5.03065184543009	7.2288413657157395	9.73390042294947	7.33841453901196	-4.76236237123169	5.0	One	Core
Chr4	3983983	3990862	LTR	0.0720027446438911	0.519406890536415	-0.34969007583250894	5.708451587527731	6.86604305690198	7.7038029304278695	9.07140571950362	-6.2562759592378	22.928571428571427	Two	Core
Chr4	3991080	3991556	LTR	0.051792828685259	0.51890756302521	-0.37866224433388596	5.03065184543009	7.89364409128275	8.16663373442324	9.39769728419381	-6.07382582582114	14.333333333333334	Two	Core
Chr4	3991556	3997992	LTR	0.0770297071129707	0.520198881292728	-0.36604554865424394	5.2277855635108	6.831422848919849	7.72649993661127	9.06781495790502	-6.310622543703389	19.784615384615385	Two	Core
Chr4	4037059	4037240	Unsp	0.22542487437185899	0.5193370165745861	0.00416666666666665	5.173816680909019	7.74260482832486	9.86926348696833	8.9382113332831	-6.31605152855069	0.0	Two	Core
Chr4	4044768	4045061	Unsp	0.30417679715302504	0.627986348122867	-0.5980148883374691	8.851811764711961	6.3785707776579	8.59528916624435	9.706702313028641	-6.03927991679896	0.0	Two	LS
Chr4	4045104	4045549	Unsp	0.305068752783964	0.595505617977528	-1.23974358974359	9.17531201782822	5.69779648061284	7.916692687141469	9.34829835026375	-6.17417815906966	0.0	Two	LS
Chr4	4059231	4059354	Unsp	0.0804960317460317	0.536585365853659	1.06666666666667	5.12828776107532	8.378272809592989	9.93732391321632	9.55563456112908	-6.32407762849717	0.0	Two	LS
Chr4	4059937	4060150	Unsp	0.265443534482759	0.549295774647887	-0.555555555555556	5.03065184543009	7.703480026830549	10.4868397033218	9.38672112752717	-6.340929056817419	0.0	Two	LS
Chr4	4073046	4073164	Unsp	0.26057016	0.5169491525423731	-2.48214285714286	5.17425132346575	7.177517331757	11.360521394360001	9.34951548814143	-6.2312092379208694	0.0	Two	LS
Chr4	4077962	4078163	Unsp	0.16274545454545497	0.587064676616915	0.404761904761905	5.03065184543009	1.85921782682803	9.61446521678562	9.5143843041022	-6.643856189774719	12.333333333333334	Three	LS
Chr4	4083645	4086845	LTR	0.17191782078634602	0.131875	1.11994161057497	5.03065184543009	8.5063199434393	9.44601610390789	6.520796787978769	-5.46382116068757	39.666666666666664	One	Core
Chr5	281	462	Unsp	0.16743810526315803	0.298342541436464	1.24	5.03065184543009	9.82838673458605	10.7277472606043	8.06511155753726	-5.17401630525729	20.666666666666668	One	LS
Chr5	22169	22355	Unsp	0.27213227722772304	0.5053763440860221	0.543478260869565	5.10471848180467	9.37492303685775	10.0027027454866	9.80337825190386	-6.28036778124323	0.0	Two	LS
Chr5	22406	24268	DNA	0.0032113290460878898	0.5477980665950589	-0.6201485148514849	7.497183903324539	7.1103209298443	7.7217758560214405	9.08241372735363	-6.202672583223681	28.63157894736842	Two	LS
Chr5	30481	30631	LTR	0.12409202453987699	0.573333333333333	0.0615384615384615	5.47798066076158	8.260829271669099	6.5572122117822005	10.1290703782423	-5.35150121027071	3.6666666666666665	Two	Core
Chr5	51583	51785	Unsp	0.22052678733031697	0.608910891089109	-0.26900584795321597	5.100184687091179	6.71052651659752	7.25028185745795	9.59085518374017	-6.4757155980105905	0.0	Two	Core
Chr5	51889	52040	LTR	0.18236703030303	0.4701986754966889	1.5641025641025599	5.09975004453444	0.0	9.576783595477039	8.701975047715889	-6.643856189774719	16.333333333333332	Three	Core
Chr5	52142	56511	LTR	0.0971916803911477	0.27475955289836196	1.19373776908023	5.81552087297006	7.54625441200086	8.6778706079803	7.81141314607759	-4.26449044320094	18.177777777777777	One	Core
Chr5	54938	55414	LTR	0.051792828685259	0.51890756302521	-0.37866224433388596	5.03065184543009	8.29873921993837	7.80071796618558	9.37427337449754	-6.1208425040512005	17.0	Two	Core
Chr5	73320	73546	Unsp	0.25613948051948	0.389380530973451	0.27893738140417496	5.20296749021384	5.17158531877995	9.747072438774891	8.723207872352178	-5.874740072004809	0.0	Two	Core
Chr5	135871	136185	DNA	0.204979689440994	0.445859872611465	-0.0789473684210527	5.74071353231308	3.04910435209775	7.45618910537155	10.0988892961226	-6.12491782438356	0.0	Three	Core
Chr5	241119	241907	DNA	0.11100450063211098	0.33502538071065996	1.6727272727272702	5.03065184543009	6.92939261992088	8.49114754225249	8.711159418279621	-4.78958353782707	5.888888888888889	One	Core
Chr5	293527	293736	Unsp	0.222710900473934	0.42583732057416296	-0.263427109974425	5.2023543974499	1.4247529848538203	7.81303655138035	9.51167136587433	-5.627720133967849	0.0	Three	Core
Chr5	406650	406895	DNA	0.28313848605577696	0.469387755102041	-0.8746803069053709	5.44774206346151	0.780782593077215	8.63076733454299	9.53046778788387	-6.05889368905357	0.0	Three	Core
Chr5	431083	431265	Unsp	0.181370808080808	0.554945054945055	0.166666666666667	5.03065184543009	1.55384801115244	9.93753467150368	9.6853586880524	-5.7828326029235395	0.0	Three	Core
Chr5	457279	457522	Unsp	0.175224819277108	0.47325102880658393	0.480769230769231	5.20439307525702	0.785757254308379	7.4110228820071695	9.19204337147802	-6.318280317872221	0.0	Three	Core
Chr5	477925	478124	Unsp	0.266853333333333	0.537688442211055	-0.6937799043062199	5.128900853839269	7.5992060115959905	10.1953946692969	9.54830783116854	-6.643856189774719	0.0	Two	LS
Chr5	478331	478439	Unsp	0.224397522123894	0.46296296296296297	0.0	5.03065184543009	7.564583035915049	10.292421240185801	9.66779934627257	-6.313031694398969	0.0	Two	LS
Chr5	521915	522391	LTR	0.051792828685259	0.51890756302521	-0.37866224433388596	5.09975004453444	8.03425450565714	8.08643186642658	9.45550412619882	-5.108005806209991	14.8	Two	Core
Chr5	523063	523407	LTR	0.403240490797546	0.543604651162791	-1.1047619047619	5.03065184543009	6.11786792509299	7.12234096490512	9.55463409078221	-6.350958463615201	0.0	Two	Core
Chr5	551161	551393	Unsp	0.13860739495798302	0.439655172413793	0.130952380952381	5.3430986292814495	0.0	7.72082850127702	10.0837816557031	-6.643856189774719	0.0	Three	LS
Chr5	560181	561160	LTR	0.386379734345351	0.49049429657794696	-0.5419512195121949	5.128900853839269	7.0517437808014	9.32746315821941	9.03268798921898	-6.437553174871829	0.9090909090909091	Two	LS
Chr5	560561	560737	Unsp	0.224287564766839	0.556818181818182	0.302631578947368	5.03065184543009	8.89652190467511	10.294848312224099	9.328397498409151	-6.28174352797181	0.3333333333333333	Two	LS
Chr5	560805	560988	Unsp	0.250339187817259	0.513661202185792	0.494736842105263	5.03065184543009	8.5189181838612	9.63946379729568	9.6502683003953	-6.643856189774719	4.5	Two	LS
Chr5	566023	569342	Unsp	0.0237985641639246	0.5272672491714371	-0.767019733661495	6.26956078685044	5.138228579446361	8.14450225433441	8.196561014679089	-6.30134024825311	24.294117647058822	Two	LS
Chr5	569316	571752	Unsp	0.0428005730659026	0.5233990147783251	-0.6166480029861889	6.17582927666919	5.16581335141772	8.960051820614849	8.996849925707151	-6.393680737025759	16.12	Two	LS
Chr5	582099	582316	Unsp	0.353776197183099	0.557603686635945	-1.07	5.03065184543009	7.624225467546831	9.592923255257642	9.600775410940448	-6.428288969730329	3.75	Two	LS
Chr5	582920	586699	Unsp	0.0355126747560011	0.543794654670548	-0.641926824418373	7.3482083067201	6.3957131549594495	8.30881804291195	9.357672078241132	-6.35763848860852	5.052631578947368	Two	LS
Chr5	586696	588136	Unsp	0.0264270158511371	0.5701388888888891	-0.5926625728231779	5.24744857759222	5.7143252573066405	8.18683973253136	9.48871380906893	-6.28863308048797	9.1875	Two	LS
Chr5	590749	592376	Unsp	0.051240743902439	0.6404425322679781	-0.565895953757225	5.09975004453444	5.1750317923714695	7.40042210822557	9.59954018872111	-6.2892161254060595	12.823529411764707	Two	LS
Chr5	592369	593056	Unsp	0.0502705217391304	0.59825327510917	-0.9733333333333329	6.650822623540961	6.38803375496524	7.61049063417948	9.289762203956599	-6.29494642816837	14.0	Two	LS
Chr5	593772	597068	Unsp	0.0124347552870091	0.5940533980582521	-0.663311688311688	7.5874496030310405	6.26551215585528	7.75404006134025	9.75385605809005	-6.31038614085857	4.852941176470588	Two	LS
Chr5	597103	597466	Unsp	0.107744383561644	0.5123966942148761	-0.853682170542636	5.41966625470559	6.95906864841932	8.49468714697266	9.37105319183544	-5.72982474995193	4.5	Two	LS
Chr5	603788	607776	Unsp	0.19254651394422304	0.539368104312939	-0.639413637704601	6.4807733389694295	6.6401523883078895	8.90174215669429	9.3832932234123	-6.2328312623849405	8.024390243902438	Two	LS
Chr5	607802	612543	Unsp	0.0376468511892233	0.546298249314491	-0.664647610869165	6.697218613486429	6.404043036180051	8.51623403849919	9.49482596609249	-6.28036778124323	10.375	Two	LS
Chr5	616873	617085	Unsp	0.0646540639269406	0.495283018867925	-0.33333333333333304	5.03065184543009	0.0	9.89748370557022	9.30191011134757	-6.28491325256681	27.0	Three	LS
Chr5	655033	655152	LTR	0.259283203125	0.436974789915966	-0.25	7.64496342471192	7.85265524634818	10.179426077216801	9.8177501130839	-6.24609668192772	15.0	Two	LS
Chr5	660234	660447	Unsp	0.0851356880733945	0.49295774647887297	0.0454545454545454	5.03065184543009	6.66997387376286	9.151776467036038	9.047065296637651	-6.05889368905357	22.0	Two	LS
Chr5	678878	679311	LTR	0.0629733029612756	0.531177829099307	-0.0367700072098053	5.03065184543009	9.12478423000237	8.78107301022616	9.64614753282767	-6.38379335047222	13.166666666666666	Two	LS
Chr5	688221	688360	Unsp	0.28554927152317894	0.517985611510791	0.625	5.274000430177099	9.09522742406567	10.3941402652624	9.847674757330779	-6.41903294218351	36.0	Two	LS
Chr5	695339	695566	LTR	0.10211587719298199	0.43612334801762104	-0.353448275862069	5.769934504753269	7.61167852231103	8.081148168458249	9.61526606911968	-6.21061607522253	30.0	Two	LS
Chr5	701437	707354	LTR	0.19978523489932898	0.46059443911792897	0.6547920260686221	6.135650494947869	7.3497639806739405	10.3029058378167	8.71721610274823	-6.13611667696405	35.96666666666667	Two	LS
Chr5	711485	711671	Unsp	0.302723015075377	0.510752688172043	0.36764705882352894	5.03065184543009	7.40580356268029	10.995301855089998	9.521140363187529	-5.93285238947247	36.0	Two	LS
Chr5	718850	718958	LINE	0.21500474576271203	0.472222222222222	-0.381818181818182	5.03065184543009	8.57941442958007	10.7880096761414	9.74466918556894	-5.8122001553975595	36.0	Two	LS
Chr5	727107	727894	Unsp	0.105432824933687	0.523506988564168	-0.168617614269788	5.03065184543009	7.701018090004539	9.49812750138104	9.33960223698391	-6.43986156129809	27.0	Two	LS
Chr5	729275	731667	Unsp	0.0812649356044869	0.543896321070234	-0.754507462686567	6.57614691531849	6.19479490567693	8.67144939608283	9.47708456404541	-6.1602847040255	12.52	Two	LS
Chr5	731688	731827	Unsp	0.19968721804511302	0.517985611510791	-1.16666666666667	5.03065184543009	6.76709225632446	9.55027152537797	10.0530157323242	-6.643856189774719	9.333333333333334	Two	LS
Chr5	732315	732660	Unsp	0.176583571428571	0.6028985507246379	-0.7065637065637059	5.03065184543009	7.384045046905429	8.608282081424639	9.79115176398574	-6.321205120659809	9.5	Two	LS
Chr5	733300	734646	Unsp	0.19004735294117603	0.581723625557207	-0.668609022556391	5.03065184543009	6.19569059495288	8.60231376707603	9.577709810373511	-6.10756387588886	20.285714285714285	Two	LS
Chr5	737379	737503	Unsp	0.257012066115702	0.693548387096774	-1.125	5.03065184543009	0.0	8.38935732266035	10.415760361672199	-5.97327326350028	6.0	Three	LS
Chr5	737561	737742	Unsp	0.26280456410256403	0.668508287292818	0.7894736842105259	5.03065184543009	0.0	8.83578469268458	9.997132158370441	-6.314800019021111	6.0	Three	LS
Chr5	737935	738974	Unsp	0.0471770588235294	0.644850818094321	-0.7570512820512819	5.4095034559369894	5.53621931546096	7.6408414301317595	9.61565817175966	-6.49429774127591	13.727272727272727	Two	LS
Chr5	738967	739650	Unsp	0.0539207278020378	0.5988286969253289	-0.65	7.68118690435348	5.52224026592734	8.04058168806195	9.26445158981588	-6.415900443836	12.375	Two	LS
Chr5	740346	744025	Unsp	0.0933560519199567	0.594455014949715	-0.621577520216927	7.49283683451069	6.3361269614316	7.81428857321664	9.7554531129926	-6.3246601611296	8.105263157894736	Two	LS
Chr5	747768	749656	Unsp	0.0678431782540512	0.52489406779661	-0.336111111111111	5.1352948761526696	6.650218344317159	9.24658142825813	9.45937262896862	-6.30288968637895	8.7	Two	LS
Chr5	752111	756966	Unsp	0.0494115694330321	0.561277033985582	-0.8739394120458891	6.9339986751469604	6.002136110562791	8.20209937437003	9.70745055951506	-6.274235791001309	15.571428571428571	Two	LS
Chr5	757237	758972	Unsp	0.0566620725388601	0.536023054755043	-0.295917870870433	5.68439574691646	5.92160130024508	8.47286571474812	9.64363240984874	-6.317281140815981	27.833333333333332	Two	LS
Chr5	768479	768944	LINE	0.234747730192719	0.5311827956989249	-0.915360501567398	5.03065184543009	0.811638517489869	9.12829667894842	9.41165439107222	-6.26082004628627	8.333333333333334	Three	LS
Chr5	776986	777233	Unsp	0.0975473092369478	0.530364372469636	-0.6781609195402301	5.03065184543009	0.775872025967789	9.22445654363447	9.416816107386671	-6.19917764255525	8.5	Three	LS
Chr5	780007	780935	Unsp	0.112423138297872	0.5377155172413789	-0.414285714285714	5.2433495225700995	5.787754296833509	8.35922503047542	8.26880412821418	-6.45671663298021	32.0	Two	LS
Chr5	780947	781297	Unsp	0.106929247910864	0.49142857142857105	-0.27953216374269	5.03065184543009	0.5869103288201801	7.67184322104146	7.8500989206046	-6.21643496604005	34.75	Three	LS
Chr5	793891	799378	LINE	0.109914317770539	0.56114452341899	-0.5823289591030699	10.454357333053801	5.97045329587896	7.711444006214321	9.20123788626026	-6.19011590964218	13.642857142857142	Two	LS
Chr5	799415	799774	Unsp	0.130310137741047	0.506963788300836	-1.1517241379310301	5.34801157379668	6.70410589283999	9.008232529836212	9.26237551186726	-6.32389960217594	12.5	Two	LS
Chr5	799809	803105	Unsp	0.0130526926563917	0.5934466019417479	-0.669130722316114	7.56460276815956	6.5257507644163395	8.07398863103316	9.897070320125142	-6.220563871206809	4.9411764705882355	Two	LS
Chr5	803812	804500	Unsp	0.0476691860465116	0.597383720930233	-0.9684210526315791	6.52690910154432	6.783376436076339	8.157036095427621	9.76574419793371	-6.25662405615575	3.857142857142857	Two	LS
Chr5	804493	804764	Unsp	0.0984242391304348	0.616236162361624	-0.587121212121212	5.03065184543009	6.26534595321679	8.13706049193673	10.0471011307029	-5.94811325833503	7.0	Two	LS
Chr5	805314	805511	Unsp	0.138308341708543	0.5837563451776651	-0.574074074074074	5.03065184543009	7.76372590188859	9.20468496914698	9.14981973435698	-6.28036778124323	9.0	Two	LS
Chr5	805484	805718	Unsp	0.136131688311688	0.6581196581196579	-0.807971014492754	5.03065184543009	7.33913723349951	8.908899495246711	9.38538701443184	-6.500756320800519	9.0	Two	LS
Chr5	878536	878659	LINE	0.316264921875	0.577235772357724	-0.480769230769231	5.03065184543009	1.9531722284038502	9.58903115595492	9.61070422275351	-6.468556476418541	27.0	Three	LS
Chr5	914882	915685	LINE	0.0781907451923077	0.5205479452054791	-0.4	5.322580407735781	7.94062770186712	9.05740847626882	8.881609594144939	-6.139729877469679	8.11111111111111	Two	LS
Chr5	915700	916382	LTR	0.344064928684628	0.545454545454545	-0.461240310077519	5.03065184543009	6.394055271675629	9.001246465789189	9.155939555591269	-6.393120918638919	9.0	Two	LS
Chr5	931778	931991	LTR	0.0363783181818182	0.45070422535211296	-0.6339522546419101	5.16928288619553	6.05070850975667	7.7856791806128705	10.076046202724699	-6.643856189774719	18.666666666666668	Two	LS
Chr5	949381	949573	Unsp	0.24981910614525102	0.635416666666667	-1.4166666666666698	5.03065184543009	6.95326855141406	7.9782589091847695	9.84800482117055	-6.19732790877378	25.0	Two	LS
Chr5	949996	951050	Unsp	0.0532417630331754	0.63472485768501	-0.792429792429792	5.479280774518711	1.9981940908520799	7.8347527191941	9.87934957809352	-6.380488431213091	25.083333333333332	Three	LS
Chr5	951024	951686	Unsp	0.0655845112781955	0.602719033232628	-0.7720450281425891	7.18124773052989	5.115329681871519	7.61960807436191	9.80303232093962	-6.289248573049201	21.857142857142858	Two	LS
Chr5	952311	953474	Unsp	0.0835648755364807	0.632846087704213	-0.643605870020964	6.76609329348366	5.51194591032313	6.50989056572559	9.89476992023066	-6.2847849683076	23.833333333333332	Two	LS
Chr5	973429	973956	Unsp	0.18144271510516302	0.5256166982922199	-0.518218623481781	5.312094263902	4.028773244599599	8.24640493416459	9.135511742388001	-6.170328608953941	26.333333333333332	Two	LS
Chr5	973954	981971	Unsp	0.0995179962616823	0.551203692154172	-0.566501057082452	6.671124875078959	6.325718713566	8.581339338480769	9.419780246723858	-6.29911158477601	25.358024691358025	Two	LS
Chr5	983974	986454	Unsp	0.0474994451145959	0.5532258064516129	-0.7164793902541541	6.3688639226639605	6.06177418947236	8.25750472167436	9.57276943481028	-6.31153823350659	15.923076923076923	Two	LS
Chr5	986951	988394	Unsp	0.0271121197522368	0.5710325710325711	-0.5858317025440309	5.24744857759222	7.01736669537122	8.35415966565357	9.75385005571721	-6.298285594670251	7.2	Two	LS
Chr5	991081	992709	Unsp	0.0551643902439024	0.64004914004914	-0.570980699519937	5.09975004453444	6.81045599036497	8.085116941595139	10.242893763851	-6.29505238889597	16.5	Two	LS
Chr5	992768	993443	Unsp	0.0516481305637982	0.598518518518519	-0.937837837837838	6.575626527472839	7.30624967688183	8.91533356122096	10.291177442382699	-6.22518011343253	19.125	Two	LS
Chr5	994095	997392	Unsp	0.0130415558912387	0.59387321807704	-0.663311688311688	7.516948245018869	6.37911360562793	7.91112999450448	9.99099148561374	-6.20278528958563	7.823529411764706	Two	LS
Chr5	997427	997790	Unsp	0.11087841095890401	0.515151515151515	-0.9523809523809521	5.41966625470559	6.95906864841932	8.60491860219038	9.34209755791524	-6.197513579868651	9.75	Two	LS
Chr5	1007281	1007813	DNA	0.061625447761194	0.5093984962406021	-0.683333333333333	5.398390428599829	6.80136123946783	9.316787192275589	9.37022065516085	-6.44717805105448	11.285714285714286	Two	LS
Chr5	1023595	1023701	DNA	0.31196165217391303	0.47169811320754707	-1.625	5.3430986292814495	0.0	7.351725121156441	9.94229391381466	-6.33103914558712	27.0	Three	LS
Chr5	1026751	1027600	LINE	0.165942898719441	0.5477031802120139	-0.818803418803419	5.72642994578025	4.961873455260861	8.47816288751085	9.316439556192119	-6.178409106248401	26.333333333333332	Two	LS
Chr5	1027601	1027759	LINE	0.274045652173913	0.550632911392405	-0.523809523809524	5.03065184543009	7.337172859815179	8.69354323275619	9.827512464260119	-6.27601966355081	27.0	Two	LS
Chr5	1028284	1029086	Unsp	0.0575628784119107	0.605985037406484	-0.855664174813111	5.796131110587651	4.52934013124818	7.49901718882392	9.765959350469961	-6.27483717201315	23.666666666666668	Two	LS
Chr5	1029187	1030593	Unsp	0.0542667889908257	0.630867709815078	-0.533640978311029	7.23988485395084	5.33649935415009	6.62836906449454	10.0523066286274	-6.28484912195625	20.6	Two	LS
Chr5	1031256	1031989	Unsp	0.0721543404255319	0.60300136425648	-0.693223443223443	7.1129940819033495	6.368415325994801	7.4012690937417105	9.739829063437071	-6.3226478230344405	27.5	Two	LS
Chr5	1031960	1033542	Unsp	0.0692720974983964	0.6479140328697851	-0.533683657383079	5.32244454412134	1.5824450587590302	7.01916145236516	9.834212649141751	-6.1976726026914095	29.941176470588236	Three	LS
Chr5	1043565	1044054	Unsp	0.18485347916666697	0.505112474437628	0.1	5.362970710730679	6.509646041217691	10.0361254702126	9.26464741298848	-6.13801859344123	19.833333333333332	Two	LS
Chr5	1044253	1044522	Unsp	0.250035487804878	0.539033457249071	-0.645833333333333	5.03065184543009	5.83852899897413	9.37199835733117	9.300224531597221	-5.972319842049131	19.0	Two	LS
Chr5	1045912	1047285	Unsp	0.12206186805040802	0.541879096868172	-0.7357142857142859	5.85713577726861	6.19029840234313	8.20305794822002	9.53451449516135	-6.25560032316435	28.714285714285715	Two	LS
Chr5	1047347	1048556	Unsp	0.143153754152824	0.549214226633581	-0.83639774859287	7.45679983920429	5.802834060918769	8.12709162879511	9.38797654737903	-6.24174521274517	27.0	Two	LS
Chr5	1048989	1049377	Unsp	0.11633740458015303	0.587628865979381	-0.5273556231003039	5.09975004453444	0.538768546330702	7.998517709273879	9.57562508611883	-5.99391365784588	27.0	Three	LS
Chr5	1049925	1051138	Unsp	0.0792664922322159	0.56883759274526	-0.8808389907792079	5.03065184543009	5.404095536947691	7.702765109914781	9.52334927787862	-6.35713105169404	27.0	Two	LS
Chr5	1051168	1051445	Unsp	0.0507081850533808	0.5559566787003609	0.788617886178862	5.03065184543009	6.32824621421808	7.83880496962953	9.76900849194248	-6.486886843436331	27.0	Two	LS
Chr5	1055005	1055192	Unsp	0.22428531707317104	0.53475935828877	0.0	5.03065184543009	7.4456217849085995	9.50498876494338	10.092047570001801	-6.25578573809615	9.0	Two	LS
Chr5	1055200	1057642	Unsp	0.10176530995106	0.5294840294840301	-0.5670966661082261	5.61090403418136	5.8307157255095605	8.4829399853048	9.158407913325	-6.20062903640496	19.36	Two	LS
Chr5	1057615	1060526	Unsp	0.0172961934156379	0.5166609412573	-0.803592367551434	6.263024017950849	5.25583934442267	8.787344416333509	9.091083414843661	-6.14854743198844	25.5	Two	LS
Chr5	1083467	1083623	Unsp	0.313452884615385	0.43589743589743607	0.252941176470588	5.03065184543009	0.0	8.95547220897967	9.19193896549154	-5.1232283308056905	0.3333333333333333	Three	Core
Chr5	1147258	1153131	LTR	0.00365665896843726	0.533127293799498	-0.797188626658825	5.37641342672313	5.66334048205801	6.947185940506361	9.37542650700128	-6.2466552557589505	16.066666666666666	Two	Core
Chr5	1160125	1160245	Unsp	0.342356031746032	0.4	0.266666666666667	5.03065184543009	0.0	9.26170011439164	9.63452071375865	-6.643856189774719	0.0	Three	Core
Chr5	1171037	1172899	DNA	0.0032113290460878898	0.5477980665950589	-0.6201485148514849	7.54723419622108	7.18316001861528	7.6530502070135595	9.03392857231418	-6.292840367278401	29.526315789473685	Two	Core
Chr5	1181806	1181952	Unsp	0.11368986928104598	0.452054794520548	0.22727272727272702	5.173816680909019	8.846003945194079	10.1427518959021	9.692944239041509	-6.643856189774719	0.0	Two	Core
Chr5	1223040	1223172	DNA	0.200447957746479	0.37121212121212105	0.7165775401069521	5.03065184543009	8.152495466245941	7.30330288730319	9.15640083185702	-6.643856189774719	0.5	Two	Core
Chr5	1223360	1223787	LTR	0.54991106888361	0.585480093676815	-0.47987616099071206	5.2720656893181905	4.87669583068775	8.37250662122271	9.399977842344212	-6.41112826684738	0.0	Two	Core
Chr5	1255790	1256005	LTR	0.248607090909091	0.465116279069767	-0.21637426900584802	6.815643846806459	1.39914436357115	9.420011412787419	9.42082091963275	-5.976431528861601	0.0	Three	Core
Chr5	1256221	1256322	DNA	0.256571428571429	0.405940594059406	-0.355769230769231	5.46284767825297	1.4605185878053102	10.3709378618983	8.786534987981911	-5.47891804100217	0.0	Three	Core
Chr5	1318561	1324434	LTR	0.00365665896843726	0.533127293799498	-0.797188626658825	5.294042691194901	5.77367861738106	6.97799384513275	9.31056046998112	-6.2961865470216	15.416666666666666	Two	LS
Chr5	1414916	1415119	Unsp	0.23605309734513302	0.541871921182266	0.026086956521739	5.03065184543009	1.8488335017592201	9.931035828631142	9.568850906641108	-6.39492804559633	0.0	Three	Core
Chr5	1516722	1516865	Unsp	0.279882658227848	0.517482517482518	-0.461538461538461	5.03065184543009	2.23314016386906	9.25817622076375	9.04028899564692	-6.643856189774719	0.0	Three	Core
Chr5	1516897	1517084	Unsp	0.12370388601036302	0.49732620320855603	0.30606060606060603	5.03065184543009	0.0	8.01637915140697	9.50492365935578	-6.05404428939217	0.0	Three	Core
Chr5	1539686	1543810	Unsp	0.0899419634263715	0.265518913676043	1.2732281183945402	5.09975004453444	8.945343457185881	8.64608191390666	6.720451334071551	-3.73804953630701	19.232558139534884	One	Core
Chr5	1543913	1544109	Unsp	0.283504708737864	0.27551020408163296	1.49333333333333	5.03065184543009	9.03322012113615	8.80438308313311	6.59496500381232	-3.5627404552902697	28.0	One	Core
Chr5	1544109	1546620	LTR	0.0596045103503185	0.274392672242135	1.5197173841603702	5.03065184543009	9.21241014301137	8.90777894977908	6.96004592857576	-3.7596531888741	13.846153846153847	One	Core
Chr5	1546620	1553930	LTR	0.20777560572524698	0.346102647537347	1.5925270502578601	5.03065184543009	8.86729368199012	8.551053032970671	7.7896231435096395	-3.99664144296139	3.4324324324324325	One	Core
Chr5	1547745	1548275	LTR	0.0676998220640569	0.4886792452830189	-0.0999194198227236	5.03065184543009	7.90567923409317	8.41290376670773	9.142724045780529	-5.794758619393059	14.5	Two	Core
Chr5	1553930	1557761	LTR	0.0732298826597132	0.30096580527277506	1.65499717673631	5.03065184543009	8.92738840835335	8.949576149297949	7.39104156479204	-3.9409617089119	15.897435897435898	One	Core
Chr5	1557761	1558377	Unsp	0.24579961414791	0.301948051948052	1.35227272727273	5.03065184543009	8.84177825685388	9.36048709861174	7.2784514688206	-4.25007780986768	7.428571428571429	One	Core
Chr5	1558600	1558779	Unsp	0.178686787564767	0.39664804469273707	-0.478571428571429	5.15868736440645	7.27195262019141	8.53226122568306	8.76761541993981	-6.643856189774719	6.5	Two	Core
Chr5	1564008	1564245	Unsp	0.259610573770492	0.41350210970464096	-0.562962962962963	5.42547349454417	8.7132685581838	7.715860061460661	9.82043622371716	-6.643856189774719	0.0	Two	Core
Chr5	1574245	1581789	LTR	0.0779075102635413	0.210114149190337	1.21831370599844	5.16928288619553	8.27666191721341	8.705552342199299	5.41712450444105	-4.60721742354915	22.710526315789473	One	Core
Chr5	1646872	1647130	DNA	0.0888829230769231	0.33333333333333304	0.7657142857142858	5.26699331509975	0.749954984086342	7.9572362480262	8.99623006637183	-6.34656738128991	0.5	Three	Core
Chr5	1648370	1648534	Unsp	0.268008791208791	0.51219512195122	0.375	7.01917558541176	0.0	9.14993083140205	9.0939737527396	-6.2785170211696695	0.0	Three	Core
Chr5	1707512	1707613	Unsp	0.315185185185185	0.534653465346535	-1.3	5.61197650200242	0.0	8.5984285728572	9.12072522099529	-6.13051661688408	0.0	Three	Core
Chr5	1707624	1707954	Unsp	0.43386253164557004	0.551515151515152	-1.08866995073892	6.03470008612577	6.5657175263158205	6.94620509613433	8.84754314653173	-6.14170919981697	0.0	Two	Core
Chr5	1708375	1708562	Unsp	0.246842871287129	0.5401069518716579	0.0611111111111111	5.48084779353539	0.0	8.04762349135562	9.79214134851176	-6.643856189774719	0.0	Three	Core
Chr5	1867826	1868060	Unsp	0.113976066945607	0.52991452991453	1.12903225806452	5.23354388456185	9.32906977896544	5.50771796283801	9.5052146089341	-6.04661535927513	0.0	Two	Core
Chr5	1868738	1876322	LTR	0.0891707415368082	0.20299433504181302	1.20566801619433	5.03065184543009	9.10123711834809	8.08768569177136	5.2241430985915	-5.66974072399202	14.714285714285714	One	Core
Chr5	1876336	1876530	LTR	0.20309335	0.23195876288659803	1.68	5.03065184543009	10.3291892346369	8.93646700012126	7.005714177538481	-6.643856189774719	10.333333333333334	One	Core
Chr5	1876525	1876643	LTR	0.12800475409836098	0.279661016949153	1.16666666666667	5.03065184543009	10.503900856734699	7.440651981670211	7.74635415964709	-6.643856189774719	8.0	One	Core
Chr5	1876645	1880674	LTR	0.0858623119636547	0.260825267447784	1.3181498240321798	5.03065184543009	9.94811031556306	7.86826934495604	6.617073022810191	-5.438075709643201	14.121951219512194	One	Core
Chr5	1880757	1881393	Unsp	0.111721055806938	0.259433962264151	1.37650686851696	5.03065184543009	10.0297644153536	7.9597469162248	6.786431763827769	-5.515714094234331	11.142857142857142	One	Core
Chr5	1881393	1884016	LTR	0.0644859528411287	0.191993781577925	1.18058548009368	5.03065184543009	9.35016149954265	7.42825434422354	5.174738219594509	-6.19072985450779	20.714285714285715	One	Core
Chr5	1881806	1882581	Unsp	0.293430754966887	0.20258064516129	1.31380027739251	5.03065184543009	9.24119859140249	7.824489055125821	4.86813905704974	-6.643856189774719	18.125	One	Core
Chr5	1884021	1891595	LTR	0.0973281166219839	0.20646464646464602	1.23086828550405	5.03065184543009	9.810121315887061	7.51546134749241	5.5193254145998	-5.6303819553580405	19.776315789473685	One	Core
Chr5	1891595	1893764	LTR	0.0878621679962459	0.24739829706717104	1.34531877957718	5.03065184543009	10.3885676763294	7.8695733343114105	7.35543192911133	-5.2724079590435595	9.565217391304348	One	Core
Chr5	1893866	1894021	LTR	0.21253691860465102	0.425806451612903	2.56923076923077	5.03065184543009	10.425586382253801	8.83742510238006	8.37028436839621	-6.643856189774719	3.6666666666666665	One	Core
Chr5	1894012	1906350	LTR	0.0898788323353293	0.22524154589372	1.27362104187947	5.100184687091179	10.1531410985158	7.83760700258968	6.932675874650349	-5.38751643651494	5.887096774193548	One	Core
Chr5	1894686	1899201	LTR	0.0941601168276792	0.27283027418989303	1.36494545454545	5.03065184543009	10.150787815890599	7.83361542550688	7.4176027620598495	-5.6042529873029805	7.702127659574468	One	Core
Chr5	1899204	1905363	LTR	0.0990314674000971	0.253612599447962	1.3052954510234498	5.03065184543009	10.181525064189401	7.77979008163087	6.578288804929169	-5.547572537588099	4.354838709677419	One	Core
Chr5	1906350	1906571	Unsp	0.16919022624434402	0.19909502262443396	1.09121621621622	5.03065184543009	10.3442104501874	8.74260555492661	7.33603506406559	-6.643856189774719	3.6666666666666665	One	Core
Chr5	1906605	1907036	Unsp	0.3458133640553	0.568445475638051	-0.508021390374332	5.247883220148959	10.1479048552002	6.920635502940151	9.388502989154288	-6.250282392240179	0.0	Two	Core
Chr5	1907035	1907912	LTR	0.158234057142857	0.335233751425314	1.04519697787372	5.173816680909019	10.59401111924	7.2560298239659105	8.08241840265312	-5.436650172252951	1.8	One	Core
Chr5	1907912	1915442	LTR	0.106632098033935	0.202435723951286	1.22262396694215	5.100184687091179	9.92768427500335	7.469760328832081	5.2720694522217	-6.08058876015289	22.539473684210527	One	Core
Chr5	1915442	1930233	LTR	0.148558929743926	0.27698574338085497	1.2431455399061	5.03065184543009	10.052590944053499	7.46480260801594	5.99120083442234	-5.873899477765121	14.442953020134228	One	Core
Chr5	1915676	1923247	LTR	0.0974704768981356	0.236013036393265	1.29584473011272	5.03065184543009	10.1499300747956	7.381707840112701	6.0040994411058	-5.790450169320849	16.558441558441558	One	Core
Chr5	1923247	1928994	LTR	0.0980312104981253	0.20834826227158698	1.22334807544731	5.03065184543009	9.92655954552501	7.45561504076794	5.52693538324221	-5.73881315777511	13.068965517241379	One	Core
Chr5	1930288	1931206	LTR	0.0929526213592233	0.252723311546841	1.5668041494813099	5.03065184543009	10.678101206257802	7.240700800296071	7.381803472800269	-5.5218656653961204	4.909090909090909	One	Core
Chr5	1931206	1949790	LTR	0.148773011976048	0.272540381791483	1.28996010638298	5.03065184543009	10.1557043725805	7.673093320171981	6.74787271428998	-5.34226695534869	11.908602150537634	One	Core
Chr5	1932697	1936600	LTR	0.11882436461126	0.239270386266094	1.2740858169520202	5.03065184543009	10.024774798508	7.492697513002599	6.24153690781366	-5.82379273216812	7.875	One	Core
Chr5	1936600	1943779	LTR	0.16493990108945	0.320218265364733	1.41345766737791	5.03065184543009	10.310025438863901	7.70241033893824	7.324222106934591	-5.75357461191141	18.25	One	Core
Chr5	1943779	1947845	LTR	0.11614512543039801	0.21716674864731897	1.1968103359527802	5.03065184543009	9.61602150212676	7.62365108212174	5.39935816796574	-5.63399669933159	11.333333333333334	One	Core
Chr5	1949790	1957362	LTR	0.0942197854652722	0.22451456310679604	1.25376007325054	5.03065184543009	9.868797335822471	7.54141045770815	5.80317480135172	-5.997039801169361	15.441558441558442	One	Core
Chr5	1957362	1972611	LTR	0.0642184827586207	0.25482093663911803	1.2675438596491202	5.03065184543009	9.9237456808324	7.63012839275728	6.23443133820341	-6.643856189774719	9.084415584415584	One	Core
Chr5	1957700	1970922	LTR	0.0951527449078565	0.21708819714656302	1.25121396593789	5.03065184543009	9.90329395905722	7.62465834066155	6.2102986489334295	-5.70150384877454	9.300751879699249	One	Core
Chr5	1959614	1960093	LTR	0.273454336633663	0.29853862212943605	1.30132309005548	5.03065184543009	10.372920336658	8.06555232565497	7.264811260337741	-5.70783681567655	3.8	One	Core
Chr5	1960093	1966075	LTR	0.322558382278906	0.261451019725844	1.36578929092298	5.03065184543009	10.0897681392956	7.582133725347589	6.565372391456321	-5.7360669986585595	9.508196721311476	One	Core
Chr5	1966075	1966554	LTR	0.28146357142857104	0.30688935281837204	1.25857200484066	5.03065184543009	10.1574056998041	7.643051714563709	6.91377778433657	-5.928052161981451	4.666666666666667	One	Core
Chr5	1970961	1972223	LTR	0.0952344023083265	0.23153526970954397	1.36898395721925	5.03065184543009	9.889855285291368	7.7909086460360095	6.16002466636845	-4.99305587569082	9.214285714285714	One	Core
Chr5	1972611	1972808	LTR	0.178559497487437	0.467005076142132	0.166666666666667	5.03065184543009	10.9867609985713	7.00352300826809	8.142051864929709	-6.03380270809074	13.333333333333334	One	Core
Chr5	1972831	1975896	LTR	0.115474249414911	0.19959609559071	1.17074941654421	5.03065184543009	9.98956325797352	7.44321025140208	5.538216031666889	-5.32909975028962	15.580645161290322	One	Core
Chr5	1975896	1979233	LTR	0.0900397714285714	0.29644268774703597	1.3620657867623898	5.32585612171277	10.3587734764859	7.682177039046099	7.036547258043821	-5.6185280098287	8.028571428571428	One	Core
Chr5	1979233	1986794	LTR	0.10106025865552999	0.24566865186789397	1.33308404132264	5.03065184543009	9.90658443918196	7.52522666706048	6.1977307708651	-5.8617330070898195	16.223684210526315	One	Core
Chr5	1986794	1988346	LTR	0.11383568106312301	0.29592518370073495	1.4	5.03065184543009	10.468283655328099	7.650050509345441	7.14461608566555	-5.8835567535397	3.1176470588235294	One	Core
Chr5	1988448	1988599	LTR	0.168539090909091	0.503311258278146	0.7888888888888891	5.03065184543009	10.792869652307001	8.992765380171699	8.5875500633779	-6.643856189774719	0.0	One	Core
Chr5	1988599	1990432	LTR	0.110050850587577	0.218924972004479	1.27179295524619	5.03065184543009	9.95543625216546	7.95696755796705	6.299770752702	-6.093904053881269	10.8	One	Core
Chr5	1990432	1997587	LTR	0.0983447493554855	0.20907127429805603	1.25797796971452	5.100184687091179	9.98045007131285	7.904103334826501	5.41129759282624	-5.66986627689768	17.61111111111111	One	Core
Chr5	1997587	2004499	LTR	0.0846455406380829	0.276331018518519	1.41259585345072	5.03065184543009	10.0349713308613	8.10610769357573	7.03247145572251	-5.50665967140785	3.7	One	Core
Chr5	2004499	2006902	LTR	0.150987258996002	0.307864164432529	1.39176194442341	5.03065184543009	9.53659058825269	7.88211299853316	6.89864218347758	-4.9541296607485705	17.76923076923077	One	Core
Chr5	2006902	2007103	LTR	0.116017169811321	0.512437810945274	-0.111455108359133	5.03065184543009	8.664371890906741	7.290194433768231	9.408824825939131	-5.93427967706151	17.0	Two	Core
Chr5	2007103	2013970	LTR	0.0706010966057441	0.518858307849134	-0.354465721529977	5.17425132346575	6.98180632398117	7.66778852679425	9.09313643403181	-6.22653520082451	23.130434782608695	Two	Core
Chr5	2013970	2014250	LTR	0.203967567567568	0.33928571428571397	1.25882352941176	5.03065184543009	8.66773977053489	8.709392559801849	8.49557945400622	-4.25421155015198	6.0	One	Core
Chr5	2014250	2020169	LTR	0.197685656565657	0.355634397702315	1.6144448019448001	5.128900853839269	9.60807540999643	7.8795324732276795	7.65875228331354	-4.574199357080549	3.1166666666666667	One	Core
Chr5	2020169	2020659	LTR	0.21493708737864103	0.36326530612244895	1.53133903133903	5.03065184543009	9.758701996303769	8.544185667150499	8.12625118959838	-4.06051706611345	8.0	One	Core
Chr5	2020659	2026301	LTR	0.134317263875365	0.296346942762258	1.4069331217083898	5.10471848180467	9.329446182664961	8.003734080814509	7.41664790186391	-4.58207779790663	16.103448275862068	One	Core
Chr5	2020815	2021291	LTR	0.051792828685259	0.51890756302521	-0.37866224433388596	5.03065184543009	7.7551804986637904	8.22130831405266	9.322491821303778	-5.95738411259708	14.8	Two	Core
Chr5	2026301	2029269	LTR	0.10163435278336698	0.268867924528302	1.3220104379396398	5.03065184543009	10.057515839557901	8.18711072863105	6.77470992585306	-5.204866368751441	4.7	One	Core
Chr5	2029262	2029505	LTR	0.13799669354838698	0.255144032921811	1.47058823529412	5.03065184543009	9.6625413364687	8.55061618527018	7.450036084101829	-4.10301624228588	6.25	One	Core
Chr5	2029505	2030280	LTR	0.127518067226891	0.19007092198581602	1.14900763358779	5.03065184543009	9.43199301165029	7.77749179285737	5.33938237493774	-5.306591784504961	18.875	One	Core
Chr5	2030317	2037892	LTR	0.103985833333333	0.240037194473964	1.3228004434901	5.03065184543009	9.41632599034735	7.8694377299984595	5.94931304340682	-5.0523579311866795	15.210526315789474	One	Core
Chr5	2037892	2038057	LTR	0.10093772455089801	0.290909090909091	1.65	5.03065184543009	9.81806515036121	8.6385460844383	7.30666196942771	-5.1821254550478395	3.0	One	Core
Chr5	2038057	2038670	LTR	0.17574656	0.262642740619902	1.2840535205088799	5.03065184543009	10.193942666398302	8.62133094988881	7.19895057438931	-4.97759358695172	2.857142857142857	One	Core
Chr5	2038676	2038868	LTR	0.0900359585492228	0.453125	2.9	5.03065184543009	10.3654284000143	7.7871822266374	8.582605700415241	-4.8668323436867595	0.0	One	Core
Chr5	2038868	2039857	LTR	0.10851290258449302	0.26592517694641	1.4199623352165702	5.03065184543009	9.06088475575974	8.07832799930353	6.64137640853245	-5.590557963614679	4.2727272727272725	One	Core
Chr5	2039859	2041158	LTR	0.0506408993902439	0.217090069284065	1.4000522261391801	5.03065184543009	9.528540693265699	8.167274687705719	6.03391710270113	-4.0982066130784	6.642857142857143	One	Core
Chr5	2041195	2041827	Unsp	0.133535683890578	0.280063291139241	1.43647316538883	5.03065184543009	9.895668458463991	8.42551914016256	6.920595344258031	-4.69292423241067	3.625	One	Core
Chr5	2041920	2043085	LTR	0.14315334928229698	0.24039408866995104	1.2925101214574901	5.03065184543009	8.7262673560699	8.26499484226571	6.0095568529070595	-4.8036366338114895	6.083333333333333	One	Core
Chr5	2043085	2043399	LTR	0.155078885448916	0.229299363057325	1.16170212765957	5.03065184543009	9.376959763092481	8.23805469493484	6.56743157982423	-2.8320277911378104	8.25	One	Core
Chr5	2123378	2123556	Unsp	0.109074759358289	0.50561797752809	0.693602693602694	5.20439307525702	8.54759476452557	8.604329065095849	9.86708434031959	-6.48158476087585	0.0	Two	Core
Chr5	2132269	2132464	Unsp	0.165563730569948	0.492307692307692	-0.145502645502646	5.09975004453444	2.20555549704277	9.80288125410552	9.3792555820884	-6.28036778124323	0.0	Three	Core
Chr5	2136717	2137356	Unsp	0.131256986506747	0.336463223787167	1.29945205479452	5.3026420836662	8.14483296219485	8.115104179389089	7.653392565948019	-3.9395947606812203	4.714285714285714	One	Core
Chr5	2137352	2144650	LTR	0.0685692349200231	0.23138091543832398	1.3051915950834698	5.128900853839269	8.3525971726728	8.3730919388739	7.2171444474950395	-4.05773703458538	20.027027027027028	One	Core
Chr5	2137493	2137776	LTR	0.150164756944444	0.406360424028269	0.901069518716578	5.03065184543009	9.653895844164	9.271268152951789	7.950209496625639	-4.742989381793981	17.75	One	Core
Chr5	2142674	2144531	DNA	0.000538213132400431	0.510500807754443	-0.40021208907741296	5.03065184543009	8.1848666272839	8.27630327116036	8.47921164865617	-6.2965290775678895	30.95	Two	Core
Chr5	2144650	2145284	Unsp	0.105113303167421	0.318611987381703	1.28205128205128	5.03065184543009	8.478460335823469	8.72156346959695	7.313024043290759	-4.35779674747536	8.142857142857142	One	Core
Chr5	2145680	2145914	Unsp	0.0650989830508475	0.5512820512820511	0.8467432950191569	5.2569363728156295	8.5868431426589	6.4045589816751205	10.6117909380543	-5.80599238925598	18.25	Two	Core
Chr5	2148410	2152521	LTR	0.0850936233316856	0.258354114713217	1.12715392142229	9.87535579619108	9.178090282644051	8.31692367043486	6.75752169748435	-4.88400374941353	20.166666666666668	Two	Core
Chr5	2152521	2159901	LTR	0.0936875543097407	0.24355806565478302	1.28329867906067	5.03065184543009	9.421997605977369	8.46139468862028	5.93145105592915	-4.82786751938332	21.96	One	Core
Chr5	2153665	2155327	Unsp	0.0763803915662651	0.240673886883273	1.25588049856928	5.03065184543009	9.251556864395079	8.15941511107612	5.824735411443401	-4.87640216810963	24.833333333333332	One	Core
Chr5	2172691	2178531	LTR	0.254460985650837	0.300342465753425	1.46499238964992	5.03065184543009	9.829030194835699	8.2869649812211	7.06130013107808	-4.666021121516071	11.233333333333333	One	Core
Chr5	2178544	2179106	LTR	0.19248563380281697	0.34697508896797197	1.6693620844564199	5.03065184543009	9.79131499277678	8.43280992331864	7.792770509561829	-4.62449839661652	17.428571428571427	One	Core
Chr5	2179106	2179562	LTR	0.255589484978541	0.307017543859649	1.3833333333333302	5.03065184543009	10.2173326243392	9.12890381975052	7.37394801840788	-4.43905554612119	10.2	One	Core
Chr5	2184433	2184633	LTR	0.10804901960784301	0.315	1.3030303030303	5.03065184543009	9.53077294860938	8.49699760518128	7.234510609976421	-6.643856189774719	29.0	One	Core
Chr5	2184633	2185411	LTR	0.0987222733077906	0.21850899742930602	1.23996062992126	5.03065184543009	9.60788563545922	8.58030063656803	5.98463631270545	-5.81096617560998	26.666666666666668	One	Core
Chr5	2185517	2185664	LTR	0.189295	0.45578231292516996	1.9191919191919198	5.03065184543009	9.08274106655389	8.96027088770212	8.26774746488928	-6.643856189774719	25.5	One	Core
Chr5	2185970	2186078	LTR	0.16321781512605	0.574074074074074	0.7	5.100184687091179	11.363947942412	7.733752078661129	9.55137303237608	-5.87051820594356	25.0	One	Core
Chr5	2186080	2186553	LTR	0.35205052104208395	0.26427061310782196	1.29279279279279	5.03065184543009	9.615826573885661	8.71114378345954	6.96135751976632	-4.9594763225297305	13.666666666666666	One	Core
Chr5	2186553	2192535	LTR	0.356390876097232	0.21815446339017	1.25773195876289	5.03065184543009	8.754405858443139	8.39346145418815	5.47899802681695	-4.916228460187849	14.819672131147541	One	Core
Chr5	2192535	2193008	LTR	0.327134558232932	0.266384778012685	1.4459459459459498	5.03065184543009	8.815464748173119	9.20453634038474	6.729505579171811	-4.306415095516041	10.833333333333334	One	Core
Chr5	2193503	2194419	LTR	0.0916581976112921	0.210698689956332	1.32005965697241	5.03065184543009	9.15407269838066	8.5348572268399	7.84847372121464	-5.81096617560998	31.0	One	Core
Chr5	2194404	2195055	Unsp	0.0960577794117647	0.2642089093702	1.24761904761905	5.03065184543009	8.063851288540171	8.61344428020472	6.78536307640429	-5.1780830442636	12.142857142857142	One	Core
Chr5	2195135	2195611	LTR	0.051792828685259	0.51890756302521	-0.37866224433388596	5.03065184543009	7.61291798003349	7.94847723204105	9.4083813682562	-5.83842871628824	16.666666666666668	Two	Core
Chr5	2195611	2201594	LTR	0.0793429033333333	0.521644659869631	-0.38053085199824294	5.03065184543009	6.731919601970531	7.712300562671139	9.034124818729321	-6.309374992050401	19.233333333333334	Two	Core
Chr5	2201594	2202070	LTR	0.051792828685259	0.51890756302521	-0.37866224433388596	5.03065184543009	8.27316523144983	7.67577517334933	9.48271928132801	-6.40733630245425	17.666666666666668	Two	Core
Chr5	2202075	2203379	LTR	0.044576783625731	0.199211045364892	1.3268322981366498	5.03065184543009	8.78056513672562	8.73090287210585	6.749762735041861	-5.17401630525729	21.5	One	Core
Chr5	2202132	2202415	LTR	0.141900763888889	0.39222614840989395	0.8503225806451609	5.03065184543009	9.51501301330522	9.17033974543209	8.02227498246094	-4.37675211963188	22.0	One	Core
Chr5	2203377	2204017	Unsp	0.0902693243243243	0.3125	1.3513888888888899	5.03065184543009	9.65908417491233	8.90375367753366	7.12431005709148	-4.16656019882791	10.875	One	Core
Chr5	2203966	2204100	LTR	0.0752021276595745	0.23134328358209	1.4590909090909099	5.03065184543009	8.78461587087329	9.73452708143064	7.25929519075269	-6.643856189774719	3.5	One	Core
Chr5	2204100	2207313	LTR	0.0800612625653398	0.284141867101508	1.27548898814107	5.2569363728156295	8.06262098784066	8.52717636761964	7.12055769823223	-4.16628070886535	16.424242424242426	One	Core
Chr5	2206137	2206769	Unsp	0.121155569044006	0.330696202531646	1.23723723723724	5.03065184543009	8.26854811136462	8.53680225277164	7.235630624196559	-4.4276083880543	6.571428571428571	One	Core
Chr5	2289392	2289645	DNA	0.16618888030888002	0.466403162055336	-0.393939393939394	5.03065184543009	1.6256449558992698	7.701186477113921	9.73926256975008	-6.470663474498499	0.0	Three	Core
Chr5	2347036	2348552	Unsp	0.126616152849741	0.260554089709763	1.1728876750336001	5.09975004453444	8.35473284184754	8.56744504991907	6.874367548567459	-4.1461448828244905	3.6875	One	Core
Chr5	2347757	2350360	Unsp	0.0822725652841782	0.240491740299654	1.39659101266977	5.03065184543009	8.87587389621427	8.76526654111441	6.1624510573302995	-4.21368474164298	5.111111111111111	One	Core
Chr5	2348553	2351157	Unsp	0.105666107921929	0.261520737327189	1.4531318993250502	5.03065184543009	9.18558653608269	8.8331521422869	6.4754771323465095	-4.05274146207197	4.296296296296297	One	Core
Chr5	2351301	2351499	Unsp	0.234903677130045	0.22727272727272702	1.4333333333333302	5.03065184543009	9.70296375554992	8.801279832044619	6.385564228443671	-6.643856189774719	6.0	One	Core
Chr5	2351499	2360510	LTR	0.0727528965517241	0.307692307692308	1.65087719298246	5.03065184543009	9.0164494437526	8.46033889084437	5.917142154554959	-4.19907134710183	10.956521739130435	One	Core
Chr5	2351940	2355603	LTR	0.0896838274737224	0.21403221403221398	1.25485988023952	5.03065184543009	8.85840578962759	8.31962033016211	5.60237107533976	-4.20541705797433	12.631578947368421	One	Core
Chr5	2355686	2356327	Unsp	0.12112950598802401	0.338533541341654	1.17753047164812	5.03065184543009	9.601981438469391	8.72458597408228	6.92263053117466	-4.81197894858305	3.875	One	Core
Chr5	2356324	2359118	LTR	0.360628676258993	0.205798138869005	1.2755809021068	5.03065184543009	9.04319896485696	8.524286165789349	5.09221572079222	-4.627816600097731	14.068965517241379	One	Core
Chr5	2359118	2359651	LTR	0.320556666666667	0.23076923076923103	1.3890518084066499	5.03065184543009	7.986419244202981	9.00927135314421	5.923320828443071	-5.131957151243291	7.666666666666667	One	Core
Chr5	2360510	2367380	LTR	0.23853320639534897	0.32940320232896697	1.4794347136067398	5.03065184543009	9.33526382817268	8.39014371366707	7.388809409468241	-4.32016440879865	3.0	One	Core
Chr5	2367380	2367652	LTR	0.0563188321167883	0.297794117647059	1.79411764705882	5.1352948761526696	8.24589476044309	9.31982286067527	8.0558331490438	-3.1053839512970205	1.25	One	Core
Chr5	2367652	2368049	LTR	0.170173406326034	0.314861460957179	1.54117647058824	5.19799905294362	9.24274310987475	8.74857171423357	8.25600234344604	-3.97886438589849	3.6	One	Core
Chr5	2368049	2368525	LTR	0.051792828685259	0.51890756302521	-0.37866224433388596	5.03065184543009	8.30380006361656	7.59249946646892	9.392325423983381	-6.158193705132399	13.833333333333334	Two	Core
Chr5	2368525	2374508	LTR	0.0791642833333333	0.521477519638977	-0.38430216103203707	6.595065302000611	6.65978291261883	7.74684443364361	9.070723406551581	-6.23905411659541	18.34426229508197	Two	Core
Chr5	2374508	2374984	LTR	0.051792828685259	0.51890756302521	-0.37866224433388596	5.03065184543009	7.87563018340173	7.98685454129913	9.481033292378472	-5.893322830649309	14.6	Two	Core
Chr5	2375025	2381417	LTR	0.313439574001566	0.253911138923655	1.27299578059072	5.03065184543009	8.7876996614539	8.3761072574966	6.158423972744241	-4.24687042800495	9.846153846153847	One	Core
Chr5	2381417	2383328	LTR	0.0965151436031332	0.28257456828885397	1.63974808673469	5.03065184543009	9.598451428092211	8.606964509126989	7.13382584210386	-4.90481626737066	4.85	One	Core
Chr5	2383328	2383746	Unsp	0.284393187066975	0.28468899521531105	1.3855172413793102	5.03065184543009	9.61735944355082	8.7538199541602	6.97374785341647	-3.4427365667288194	1.8	One	Core
Chr5	2383850	2390674	LTR	0.372816332726169	0.25401109611635897	1.3213118321388202	5.03065184543009	8.53899466976519	8.31122355739581	6.2231567925814195	-4.300737929189601	26.507246376811594	One	Core
Chr5	2390975	2391179	Unsp	0.193138082191781	0.348039215686274	0.39613526570048296	5.03065184543009	7.74850364298458	8.85567573508629	8.75860596392385	-5.30436972350306	1.0	Two	Core
Chr5	2571788	2572054	LTR	0.243047810218978	0.469924812030075	-0.25652841781874	6.001789453788089	6.891010740080941	9.900712719059609	8.7808964394549	-5.693137092545941	3.5	Two	LS
Chr5	2722622	2722778	Unsp	0.336172201257862	0.49358974358974395	0.32222222222222197	5.03065184543009	1.70519896044393	9.19476500193774	9.48787378475007	-5.88167265291139	0.0	Three	Core
Chr5	2789461	2789633	Unsp	0.28198362573099395	0.575581395348837	-0.375	5.2739259169181105	6.988983223377531	6.5780870074936795	10.793094110243402	-6.12866396735774	0.0	Two	Core
Chr5	2843633	2843834	Unsp	0.23682545871559602	0.5522388059701488	-0.5350877192982461	5.29372837737325	0.907687786397919	8.81373108500044	9.210454178334631	-6.2170718050372695	0.0	Three	Core
Chr5	2848165	2848318	Unsp	0.23901158536585398	0.477124183006536	-1.06372549019608	5.10471848180467	0.0	5.728591542592571	9.63452071375865	-6.643856189774719	0.0	Three	Core
Chr5	2850348	2850539	Unsp	0.299086896551724	0.528795811518325	-0.25	5.856420486814951	7.04378611001605	8.68202226248129	8.745693828578169	-6.643856189774719	0.0	Two	Core
Chr5	2884171	2884430	DNA	0.0842712643678161	0.28571428571428603	0.41995073891625606	5.03065184543009	6.4129194528513205	7.95957286259839	8.641901682687731	-6.0636629332014405	0.5	Two	Core
Chr5	2902146	2902355	Unsp	0.23316432900432899	0.502392344497608	1.1746031746031698	5.03065184543009	6.58773581100309	9.62740616548358	9.07959200794106	-5.4493531656117495	8.333333333333334	Two	Core
Chr5	2903492	2903722	Unsp	0.263726829268293	0.269565217391304	1.4153846153846201	5.03065184543009	1.3392482962134198	9.72952539338123	7.10777926966513	-6.643856189774719	22.0	Three	Core
Chr5	2903813	2904077	LTR	0.21218301115241603	0.4583333333333329	-0.321044546850998	6.08994837115485	8.46248966401533	9.17399567183054	8.736722713957139	-5.28630418515664	16.666666666666668	Two	Core
Chr5	2904077	2904226	Unsp	0.18877044303797502	0.375838926174497	1.20454545454545	5.03065184543009	8.79361471975745	9.97369413404542	9.344335545518339	-3.5654498443094	6.333333333333333	One	Core
Chr5	3171450	3171578	Unsp	0.0935854545454545	0.5390625	0.5714285714285711	5.93273607578911	1.91041401574743	9.07111102009958	9.65703514142237	-5.76572819330374	0.0	Three	Core
Chr5	3260228	3260970	DNA	0.0917838791946309	0.338274932614555	1.47612732095491	5.22494449209055	7.38562329411725	8.666360365945058	8.16779534468487	-4.26592701975648	1.25	One	Core
Chr5	3279267	3279441	Unsp	0.32020505494505497	0.4712643678160921	-0.5142857142857139	5.03065184543009	0.0	10.558802033420301	9.3036488380588	-6.643856189774719	0.0	Three	Core
Chr5	3280030	3280300	Unsp	0.290613616236162	0.49259259259259297	0.267379679144385	5.03065184543009	7.66007005501851	9.0853616153737	9.325044467178142	-6.36716123435721	4.0	Two	Core
Chr5	3282051	3282254	Unsp	0.21587466367713	0.5517241379310339	-0.0574162679425838	5.03065184543009	0.0	9.05200562366326	9.72773958015888	-6.643856189774719	0.0	Three	Core
Chr5	3296781	3296911	Unsp	0.0454676691729323	0.515384615384615	0.230263157894737	5.100184687091179	0.0	8.62455650234406	9.83251378863319	-6.643856189774719	0.0	Three	Core
Chr5	3299747	3299875	Unsp	0.0540897709923664	0.4921875	0.157894736842105	5.4538061111490705	0.0	9.49288495329714	9.92627409209763	-5.570054889364611	0.0	Three	Core
Chr5	3305563	3305695	Unsp	0.0447893333333333	0.507575757575758	0.10526315789473699	5.100184687091179	0.0	9.14057905745435	9.82487476086849	-6.643856189774719	0.0	Three	Core
Chr5	3324079	3324206	Unsp	0.0873584615384615	0.496062992125984	0.0	6.086272559845249	0.0	9.21027631021579	10.0703949119792	-5.87051820594356	0.6666666666666666	Three	Core
Chr5	3329779	3329907	Unsp	0.0692072727272727	0.515625	0.325	5.03065184543009	8.19707895609166	9.17836479171135	10.366212445183901	-6.643856189774719	0.0	Two	Core
Chr5	3330043	3330446	Unsp	0.338668342857143	0.5508684863523571	-0.862876254180602	5.75177846503155	0.0	7.1910925935991505	9.874973750307381	-6.53010975114339	0.0	Three	Core
Chr5	3348512	3348638	Unsp	0.0784553846153846	0.5158730158730159	0.48809523809523797	5.03065184543009	1.2640308255107802	8.37839877776384	10.0214557880592	-6.21643496604005	0.0	Three	Core
Chr5	3374747	3375028	LTR	0.20342395104895103	0.455516014234875	-0.108036890645586	5.87205217058945	7.54569703185033	9.06532027582211	9.41243077337417	-6.06835401830263	7.5	Two	Core
Chr5	3395349	3395553	Unsp	0.23000911627907	0.455882352941176	0.731764705882353	5.03065184543009	7.88644998698554	9.230976648520171	9.30057509508568	-5.8372733817526194	0.0	Two	LS
Chr5	3396072	3396229	DNA	0.262286878980892	0.32484076433121	1.3949579831932801	5.03065184543009	10.1602997397703	10.0092468222216	8.5798961368788	-6.643856189774719	3.0	One	LS
Chr5	3398475	3398664	Unsp	0.257151490384615	0.5343915343915341	0.139705882352941	5.03065184543009	8.45703008476662	9.271268152951789	9.63452071375865	-6.29536988340449	0.0	Two	LS
Chr5	3401004	3401287	LTR	0.200809031141869	0.268551236749117	1.6602787456446	5.03065184543009	6.65863541870539	10.7468467496187	7.34752875173864	-6.643856189774719	10.333333333333334	One	LS
Chr5	3401305	3414681	LTR	0.13336992971887598	0.27244582043343696	1.45860805860806	5.61232066034614	6.83732412758569	7.64401732016184	9.32537843771968	-5.31321087778625	12.455223880597014	One	LS
Chr5	3401872	3402139	LTR	0.18448	0.28464419475655395	1.31453634085213	5.03065184543009	8.65859873935307	10.2795937731934	7.09580234930757	-6.643856189774719	11.25	One	LS
Chr5	3406102	3406393	Unsp	0.21048525423728798	0.7010309278350509	-1.29166666666667	5.03065184543009	7.21936153847591	6.5407956230089495	9.90962336900277	-6.35651903921546	9.333333333333334	Two	LS
Chr5	3406714	3407358	Unsp	0.273864474522293	0.762422360248447	-0.502164502164502	5.03065184543009	1.24026575654233	6.28161445404909	9.643456466889722	-6.25457017362287	23.857142857142858	Three	LS
Chr5	3407938	3408099	Unsp	0.344664331210191	0.7391304347826091	-0.716666666666667	5.03065184543009	0.0	6.97963684403209	10.369858809912	-6.3272484268206295	19.5	Three	LS
Chr5	3413838	3413988	LTR	0.11758588957055198	0.56	0.0285714285714287	5.03065184543009	10.091498755430198	10.10507338989	9.29235565265815	-6.643856189774719	4.0	Two	LS
Chr5	3414097	3414301	LTR	0.12647980861244001	0.24509803921568601	1.38235294117647	5.03065184543009	10.1606205591423	9.36769487336008	7.044428622742231	-6.643856189774719	16.0	One	LS
Chr5	3414665	3415320	Unsp	0.129319225146199	0.26717557251908397	1.2351018355544399	5.03065184543009	7.3351465925019905	9.17062601740106	6.694434720406781	-4.98613734661826	30.375	One	LS
Chr5	3415401	3421242	LTR	0.0777737340904641	0.18063133281371802	1.21623818940892	5.03065184543009	8.25012118008754	9.02819605664144	5.24174255989349	-4.13140618883794	31.28813559322034	One	LS
Chr5	3419149	3419792	Unsp	0.10915708955223899	0.31104199066874	1.45947368421053	5.03065184543009	8.57735441369107	9.3551643336139	6.811034057190599	-4.92294257965067	7.285714285714286	One	LS
Chr5	3421242	3421877	Unsp	0.145891478129713	0.21259842519685	1.2492970946579198	5.03065184543009	9.19688875642459	8.652295147882121	5.54541695741493	-4.00965017003372	35.42857142857143	One	LS
Chr5	3421819	3422205	LTR	0.15569815270936	0.18798955613576998	1.37622950819672	5.03065184543009	7.39245277584947	9.27701586195053	5.87611956862185	-4.7263183499667	29.2	One	LS
Chr5	3422284	3423647	LTR	0.115204444444444	0.22817314746881898	1.3327464788732402	5.03065184543009	8.369955807442759	9.35110785532566	6.15447945337443	-3.9222413756187002	13.133333333333333	One	LS
Chr5	3448148	3450010	DNA	0.0032113290460878898	0.5472610096670251	-0.621095674450685	6.16371217110353	7.20725768025888	8.00874700128391	9.0000747206016	-6.2812861103900195	29.5	Two	LS
Chr5	3458321	3460231	LINE	0.31605722126929703	0.493055555555556	-0.253846153846154	7.681335672782019	7.076796653073401	10.051434262841699	8.646849913250911	-6.24683105541344	29.8	Two	LS
Chr5	3461462	3466984	LINE	0.00917840287769784	0.563382832307135	-0.7370052484591679	12.2679011297728	5.628157805942121	7.0927140324686695	9.35758516070062	-6.245674262176269	17.517857142857142	Two	LS
Chr5	3467119	3467986	LINE	0.37825384431137704	0.557093425605536	-0.28617810760667894	5.2720656893181905	4.78155067877426	8.60731354457808	9.361499064960778	-6.12565054744504	30.666666666666668	Two	LS
Chr5	3475341	3475503	LTR	0.25196583850931703	0.46296296296296297	0.08	5.17425132346575	1.06229023800145	8.29076681578599	10.316939540347901	-6.643856189774719	31.0	Three	LS
Chr5	3477977	3478115	LTR	0.15254140845070402	0.4782608695652171	0.15	5.09975004453444	0.0	7.88099898391288	9.90250279926506	-6.32336432700288	31.0	Three	LS
Chr5	3481472	3482160	DNA	0.28171761151079106	0.526162790697674	-0.0518579011841569	6.014360543716849	6.697357723979009	8.735126113076191	8.961304903627349	-6.38476896845759	31.0	Two	LS
Chr5	3482358	3482584	DNA	0.328495868544601	0.52212389380531	-0.833333333333333	5.51527271587392	6.1194705280896295	8.36547437590044	9.48271928132801	-6.50854668314891	31.0	Two	LS
Chr5	3485704	3490868	LTR	0.00385802469135802	0.53272656855151	-0.7955329975197529	5.322580407735781	5.7423199390373805	7.030237852743911	9.352807431932089	-6.328056075504731	17.21153846153846	Two	LS
Chr5	3497896	3503060	LTR	0.00385802469135802	0.53272656855151	-0.7955329975197529	5.328233892964191	5.8232332187589595	7.11945904322109	9.37151442918908	-6.2591651514526605	17.18867924528302	Two	LS
Chr5	3533122	3533408	DNA	0.331922433460076	0.5419580419580421	-0.646569646569647	6.79873628520836	8.0683570918821	7.89342292011566	9.7556806254591	-6.410278631439849	31.0	Two	LS
Chr5	3536821	3538595	DNA	0.214692644581696	0.512965050732807	-0.497260405652216	5.100184687091179	5.606735345093959	9.05353180203068	8.6676470317147	-6.29387309511446	31.0	Two	LS
Chr5	3569325	3569460	LTR	0.0147382352941176	0.444444444444444	-0.3	5.69506480926295	7.43955862468858	7.79848329990806	10.0477592184185	-6.643856189774719	29.0	Two	LS
Chr5	3569460	3576328	LTR	0.0715643342036554	0.5196563774024461	-0.36236171854900895	5.2433495225700995	6.86896240051429	7.67319758926721	9.07278173955214	-6.25048609079069	24.02857142857143	Two	Core
Chr5	3576422	3582285	LTR	0.101809277573884	0.534392559581476	-0.6826007552173039	10.733128381492198	5.9770294187356106	6.93025194372826	9.20062930670259	-6.14538730282984	32.03389830508475	Two	Core
Chr5	3583074	3588235	LINE	0.17824306036139898	0.5591085271317829	-0.52432114679094	15.893728045509501	5.7238077766236	6.6983352474328495	9.08029396297182	-6.28098051940372	29.132075471698112	Two	Core
Chr5	3605641	3606739	LINE	0.275535089285714	0.537453183520599	-0.38799999999999996	5.76674085447127	5.2069501787484	8.02783605247309	9.140468525461301	-6.30362727814442	32.0	Two	LS
Chr5	3609867	3610254	DNA	0.25264737864077697	0.48578811369509006	0.7888888888888891	5.22419553571217	8.060632390963711	7.40466207646757	9.42173090060963	-6.44408667739895	32.0	Two	LS
Chr5	3614251	3616097	DNA	0.0	0.540086673889491	-0.42200217037439003	10.4950973530915	6.9406119656206595	6.525909677237901	9.07138584001962	-6.25193593012053	32.0	Two	Core
Chr5	3618296	3618546	LTR	0.10984126984127	0.584	-0.23333333333333303	6.417828064206541	6.508846764582031	6.78644937658398	9.61412387262021	-6.2363720849275195	32.0	Two	Core
Chr5	3620142	3621999	DNA	0.000538213132400431	0.510500807754443	-0.40021208907741296	5.3024636334589905	8.03403793417372	8.2670213695651	8.59144799464885	-6.34583368923841	32.0	Two	Core
Chr5	3624089	3629611	LINE	0.00917840287769784	0.563382832307135	-0.7370052484591679	12.2676227838485	5.635544367507711	7.104774479202349	9.35457803135662	-6.23112119365867	17.736842105263158	Two	Core
Chr5	3631324	3635282	LINE	0.334944966485796	0.5763670647391579	-0.67550554724998	11.486692774606302	5.58698403865991	6.3599402365000595	9.28775402991339	-6.26470182451667	30.025	Two	Core
Chr5	3643385	3644064	DNA	0.278213352855051	0.5184094256259211	-0.323613086770982	6.6244192625205995	1.0240864577106998	7.17839523090483	9.259206556995231	-6.15586765149741	34.0	Three	Core
Chr5	3644181	3650054	LTR	0.00365665896843726	0.533127293799498	-0.797188626658825	5.17425132346575	5.793216885095791	6.98141465054232	9.35397789324149	-6.24318422853701	16.716666666666665	Two	Core
Chr5	3651743	3655355	DNA	0.16408700400801599	0.552048726467331	-0.448145061639702	7.91876873351964	6.03946247005491	7.903325719048901	9.345683308341119	-6.331254030126469	33.0	Two	LS
Chr5	3681051	3681218	Unsp	0.19139036363636397	0.497005988023952	0.7380952380952379	5.03065184543009	8.054858447587879	11.0355873822126	10.082363619356698	-6.643856189774719	16.666666666666668	Two	LS
Chr5	3688701	3689029	LTR	0.249245714285714	0.481707317073171	-0.0588235294117647	5.20296749021384	6.10950391668298	10.4259009651584	9.88656212595939	-6.4468642529082	25.0	Two	LS
Chr5	3689754	3689965	Unsp	0.136805806451613	0.52132701421801	0.115384615384615	5.09975004453444	6.880255094714251	9.71764686212611	9.520337727502062	-6.436214724213411	25.0	Two	LS
Chr5	3692346	3692524	DNA	0.13804488888888902	0.44943820224719105	-0.0928571428571429	5.24256142224091	6.83093169668906	9.31153699087302	9.28116179332486	-6.47272036573436	24.0	Two	Core
Chr5	3695401	3697258	DNA	0.000538213132400431	0.510500807754443	-0.40021208907741296	5.03065184543009	8.08508332554662	8.17454922005858	8.44686240054117	-6.22569258950916	31.842105263157894	Two	Core
Chr5	3697258	3699658	LTR	0.27636793724042497	0.18041666666666697	1.22166798627606	5.03065184543009	8.66652832898032	8.88085123958145	5.15297538234969	-4.63077372696121	27.08	One	Core
Chr5	3699674	3706778	LTR	0.22721261692969896	0.32685810810810806	1.5096846434403102	5.03065184543009	9.38580438224534	8.98782833237603	7.40068419469818	-4.75139195991845	6.111111111111111	One	Core
Chr5	3708471	3709837	LTR	0.0581293591654247	0.208638360175695	1.27582046332046	5.03065184543009	9.1407968563706	9.102792601499461	6.24834970915228	-5.1232283308056905	31.6	One	Core
Chr5	3709874	3710513	Unsp	0.124502938530735	0.236306729264476	1.2510344827586202	5.03065184543009	9.41200370563802	9.19888022864171	5.8483470937848905	-5.019365324866929	34.125	One	Core
Chr5	3710492	3710828	LTR	0.0910039473684211	0.178571428571429	1.23943661971831	5.03065184543009	8.998462420591931	9.701182123658961	6.048017555389639	-3.70525673443887	30.6	One	Core
Chr5	3710909	3711544	Unsp	0.105253393665158	0.261417322834646	1.32487961476726	5.03065184543009	8.64902002296682	8.56629799327021	6.40755009760571	-5.19172937176066	12.714285714285714	One	Core
Chr5	3711544	3711774	LTR	0.0983311965811966	0.195652173913043	1.03716216216216	5.03065184543009	9.85367990320094	8.543706470737881	6.136088960771411	-5.421463768438281	28.333333333333332	One	Core
Chr5	3711777	3713362	LTR	0.10068123393316199	0.24296005239030802	1.41573243647235	5.03065184543009	9.53867496486324	8.864363364786199	5.78464678731276	-4.49060992947904	20.58823529411765	One	Core
Chr5	3713362	3720191	LTR	0.36695265033734203	0.21262263874652199	1.193078717705	5.03065184543009	9.29934023819957	8.857170545929028	5.728667400029511	-4.6139791484401105	17.420289855072465	One	Core
Chr5	3720191	3726090	LTR	0.081081327014218	0.21990151129223998	1.24632606243233	5.03065184543009	9.76235041937489	8.77859417796116	5.63193997631349	-4.81231086252078	24.866666666666667	One	Core
Chr5	3726090	3730972	LTR	0.0527390314465409	0.18784297171802397	1.2957393483709299	5.03065184543009	8.96657557566358	8.76478200354547	5.1188394710718	-4.71998016632138	21.94	One	Core
Chr5	3726282	3727049	Unsp	0.299426966887417	0.19817470664928302	1.3047619047619	5.03065184543009	9.59511126876451	9.040501650945561	4.50863390507994	-5.46382116068757	17.88888888888889	One	Core
Chr5	3731009	3731646	Unsp	0.0987303927492447	0.295133437990581	1.33554817275748	5.03065184543009	9.950057159361679	9.13059755672255	6.67387109470742	-5.97955966330675	18.571428571428573	One	Core
Chr5	3731644	3734359	LTR	0.12366594504270301	0.20579382994732898	1.2792308233143501	5.03065184543009	9.77479273583276	8.91681227500723	5.2645276259791105	-5.260592015248849	33.464285714285715	One	Core
Chr5	3734396	3734778	Unsp	0.17232230769230802	0.31675392670157104	1.36349206349206	5.03065184543009	10.599590551161699	9.43157146298428	7.2970787849219905	-4.2312577359473	26.8	One	Core
Chr5	3734778	3740427	LTR	0.30232132931584493	0.25721366613559904	1.3289524233172199	5.03065184543009	8.99258171666391	8.8299352706052	6.34439227709381	-4.447088416448401	9.482758620689655	One	Core
Chr5	3740463	3741480	LTR	0.304813874709977	0.293083235638921	1.34794685990338	5.03065184543009	8.82057543764727	9.079437535245109	6.95035364535833	-4.14959483481134	15.272727272727273	One	Core
Chr5	3741030	3741210	LTR	0.30407722513089	0.305555555555556	1.44444444444444	5.03065184543009	8.76033644528522	9.41013265594034	7.4967487363819805	-4.58221712398234	11.666666666666666	One	Core
Chr5	3741490	3741706	Unsp	0.20452841409691602	0.314814814814815	1.40909090909091	5.03065184543009	10.3205644459626	10.3248403915838	7.685950622444411	-3.4766278153621806	19.25	One	Core
Chr5	3742141	3742381	Unsp	0.397348888888889	0.579166666666667	-0.403162055335968	5.03065184543009	8.86802597800243	8.71458769424922	9.197820868209	-5.901561628686639	0.0	Two	Core
Chr5	3746291	3746559	DNA	0.272911254612546	0.43656716417910396	0.25	5.988500241651	8.04873325456787	9.10648098565648	9.902191988742029	-6.643856189774719	0.0	Two	Core
Chr5	3755032	3755247	Unsp	0.23262052173913003	0.5720930232558139	0.62962962962963	5.03065184543009	8.36329792135793	9.62744937152335	9.69388037123032	-6.321205120659809	0.0	Two	LS
Chr5	3774329	3774488	Unsp	0.171338536585366	0.47169811320754707	0.37037037037037	5.03065184543009	6.9552273822844	10.1276872864446	9.449929120885331	-6.22022754193837	0.0	Two	LS
Chr5	3789205	3790028	DNA	0.099348703030303	0.3681652490887	1.56367243867244	5.433108970698039	7.4078017834781305	8.72087423799174	8.57554831031589	-4.19354628693608	1.4444444444444444	One	Core
Chr5	3814811	3815011	Unsp	0.21876923076923102	0.55	0.51207729468599	5.100184687091179	6.62539731761532	9.60378856655645	8.97050226835885	-6.212573360305999	0.0	Two	Core
Chr5	3815150	3815327	Unsp	0.24815681318681304	0.559322033898305	-0.5375	5.03065184543009	7.665944559283201	8.40716401743425	9.325270744838571	-5.99077866412896	0.0	Two	Core
Chr5	3871254	3871510	DNA	0.11399384615384599	0.30859375	0.307142857142857	5.03065184543009	6.58222558828966	6.49021008117105	9.402036321743301	-6.22147671515471	0.0	Two	Core
Chr5	3906665	3906835	Unsp	0.211738609625668	0.5352941176470589	-0.8076923076923079	5.274000430177099	6.42646289474591	8.70723297711668	9.8032962581967	-6.38600710089362	0.0	Two	Core
Chr5	3930770	3930931	Unsp	0.19834758620689702	0.509316770186335	0.38888888888888895	5.03065184543009	1.06698153877491	9.660615629775661	9.67885982976609	-5.643856189774719	0.0	Three	LS
Chr5	3970241	3970397	Unsp	0.33719499999999997	0.5512820512820511	0.141176470588235	5.22419553571217	1.0911036734739301	8.399671083514429	9.79699460971857	-6.643856189774719	0.0	Three	Core
Chr5	3987589	3987698	DNA	0.360107913043478	0.24770642201834897	0.9841269841269841	5.03065184543009	2.5525906914332204	9.35197848392423	8.84673826681334	-3.96456630650541	1.0	Three	LS
Chr5	3989363	3989490	Unsp	0.272812941176471	0.52755905511811	-0.29166666666666696	5.03065184543009	7.7397919925203205	10.631844250988099	9.82693888936088	-6.643856189774719	0.0	Two	LS
Chr5	4116519	4117258	DNA	0.118521197846568	0.31529093369418104	1.4051724137931	5.03065184543009	7.152364909053559	8.51674820054459	8.01769567840426	-4.1267293226273	2.375	One	Core
Chr5	4171449	4171711	Unsp	0.11119347826087	0.305343511450382	1.67329545454545	5.03065184543009	9.26183589630386	11.5574428471586	8.125672997258981	-3.84266664052284	28.0	One	Core
Chr6	52	643	Unsp	0.192888174204355	0.28764805414551603	0.934030804998547	5.03065184543009	8.74556827928527	10.3171533481864	7.507545841152529	-3.7373128549792702	32.285714285714285	One	LS
Chr6	682	1306	LTR	0.24218869701726803	0.266025641025641	1.5247607157719498	5.03065184543009	9.54027585495504	10.825732251131301	7.3971195544135595	-4.9837061926593496	9.625	One	LS
Chr6	87601	87715	Unsp	0.25595264	0.49122807017543896	-0.36363636363636404	5.328233892964191	1.35078396125964	10.3489322261058	9.93294327349652	-6.643856189774719	0.0	Three	Core
Chr6	176155	176360	Unsp	0.24068018018018	0.473170731707317	0.616666666666667	5.03065184543009	7.58890644878055	9.897421950580501	9.547171310297381	-6.643856189774719	0.0	Two	LS
Chr6	176840	176984	Unsp	0.320943758389262	0.430555555555556	-0.6	5.03065184543009	7.25670861128724	10.9328760187269	9.369833159598251	-6.1697004749395	0.0	Two	LS
Chr6	292909	293857	Unsp	0.16693285867237698	0.275316455696203	1.3652663934426201	5.100184687091179	7.05032987340921	9.008451799018472	6.46921902065463	-4.4239793663570595	3.6	One	Core
Chr6	344417	349903	LINE	0.00995821176470588	0.564710171345242	-0.729888446606713	12.217616384895699	5.33120102438374	6.9548648401209805	9.36495194856879	-6.3138302768917205	13.285714285714286	Two	Core
Chr6	353888	359784	LTR	0.0964579372715028	0.537115384615385	-0.694833333333333	11.148899823632199	5.984040572005191	7.13879787328385	9.3593326454698	-6.285439676849919	29.1	Two	Core
Chr6	396803	396947	Unsp	0.0422001388888889	0.5763888888888891	-0.982142857142857	5.26872180881972	0.0	6.59770239266279	9.892204655824619	-6.035543201776191	0.0	Three	Core
Chr6	411186	411321	LTR	0.556920357142857	0.525925925925926	-0.9	5.17425132346575	7.15189767681777	8.4826106668659	9.52277420335789	-5.98977470560004	0.6666666666666666	Two	Core
Chr6	413154	413261	Unsp	0.257816551724138	0.5607476635514019	0.5	5.12828776107532	0.0	7.702007148509611	10.035442404617301	-6.249380012978199	2.0	Three	Core
Chr6	414959	415141	Unsp	0.206427208121827	0.582417582417582	-0.866666666666667	5.34769725997504	0.0	8.77443183297487	9.76387559848042	-6.643856189774719	0.3333333333333333	Three	Core
Chr6	415717	415833	Unsp	0.222744409448819	0.525862068965517	-0.725	5.03065184543009	0.0	8.26744930298644	9.65319343720224	-6.643856189774719	16.0	Three	Core
Chr6	415838	415959	Unsp	0.270981538461538	0.528925619834711	0.133333333333333	5.03065184543009	0.0	8.26923676874376	9.744305247399529	-6.643856189774719	8.0	Three	Core
Chr6	420251	433135	LTR	0.104086996466431	0.24391862007961101	1.24641943880652	5.354572288460861	8.35303897527693	8.73499986617454	6.681028151972161	-4.78194813449479	16.06153846153846	One	Core
Chr6	423288	423923	Unsp	0.107201510574018	0.330708661417323	1.3039215686274501	5.03065184543009	8.04788712939456	8.30949679154858	7.33892886206435	-4.49209197289962	5.375	One	Core
Chr6	423920	429059	LTR	0.0498216062992126	0.20332936979785998	1.33903359649628	5.03065184543009	8.34302585832701	8.68805812869409	5.45531990609277	-4.289425455200029	12.634615384615385	One	Core
Chr6	429059	429695	Unsp	0.111897175226586	0.26100628930817604	1.3563814462690902	5.03065184543009	9.37929145558142	9.104132567270538	5.87052554132531	-4.6652298405672905	8.142857142857142	One	Core
Chr6	431141	432998	DNA	0.000538213132400431	0.510500807754443	-0.40021208907741296	5.03065184543009	8.038706697827719	8.10381855230116	8.4406598273487	-6.29926090407217	31.736842105263158	Two	Core
Chr6	433135	433688	LTR	0.083181275862069	0.471971066907776	-0.120209059233449	5.09975004453444	8.05028687014552	7.820635814861519	9.1937573294611	-6.2551545992408	16.0	Two	Core
Chr6	433688	439671	LTR	0.0791642833333333	0.521477519638977	-0.38430216103203707	6.595065302000611	6.687104814303429	7.703584620906611	9.029003081733071	-6.25013193095086	18.770491803278688	Two	Core
Chr6	439671	440147	LTR	0.051792828685259	0.51890756302521	-0.37866224433388596	5.03065184543009	7.54899905520829	7.774143931988309	9.42250483730064	-6.32372137671041	14.166666666666666	Two	Core
Chr6	440147	443023	LTR	0.0903080955654864	0.24139130434782602	1.21350780639476	5.10471848180467	7.91245414935767	8.55101941922267	6.39659893059906	-4.5437323812621795	13.7	One	Core
Chr6	490991	491120	Unsp	0.0790089312977099	0.503875968992248	1.2	5.20296749021384	8.028311072849231	6.9764946884054195	10.752482096373802	-6.146603927207691	0.0	Two	Core
Chr6	532038	532193	LTR	0.139620833333333	0.567741935483871	0.17142857142857096	5.50388265414672	2.9683225454990603	7.32869726854556	10.0537764529575	-6.643856189774719	0.5	Three	Core
Chr6	550567	552051	Unsp	0.114283438337802	0.272911051212938	1.24090909090909	5.971730028734631	7.7255395032594905	8.8175005235522	7.60368971090312	-3.89405229027928	18.125	One	Core
Chr6	551276	552100	Unsp	0.0761523486682809	0.234223300970874	1.44078947368421	5.03065184543009	7.62256691220116	8.62004199146883	7.17231198180042	-3.5987826755175	14.666666666666666	One	Core
Chr6	552101	558939	LTR	0.0650305964503928	0.521205030710734	-0.331865038378192	9.44721508588075	7.0460937123223	7.682193924376709	9.12030389182491	-6.150013594749599	18.507246376811594	Two	Core
Chr6	558939	561509	Unsp	0.0962033255903988	0.26848249027237403	1.4926079243051398	5.03065184543009	8.90701328711985	9.32690423033934	7.05134115580888	-4.36054938891467	21.11111111111111	One	Core
Chr6	561613	561809	Unsp	0.262995603864734	0.28571428571428603	1.53846153846154	5.03065184543009	10.768256891087198	9.444397087077538	7.996817523214331	-3.78587519464715	17.666666666666668	One	Core
Chr6	561809	568150	LTR	0.0608840444444444	0.300555996822875	1.6444161260426298	5.03065184543009	8.67305205919765	9.04565152469349	7.693296593102291	-4.08440415191449	14.890625	One	Core
Chr6	568150	568799	Unsp	0.250721426403642	0.322033898305085	1.4976130938849699	5.03065184543009	8.41193156987116	9.47637699154556	7.95332313567026	-4.02839160065622	22.285714285714285	One	Core
Chr6	569006	569185	Unsp	0.197031968911917	0.402234636871508	0.37719298245613997	5.16928288619553	7.908016987918661	7.833294491030821	9.81678309683264	-5.87683336175234	20.0	Two	Core
Chr6	587103	587305	Unsp	0.329872156862745	0.48019801980197996	-0.24725274725274696	5.03065184543009	10.121705442803801	10.408050730971901	9.212904706956891	-5.5797258523550095	0.3333333333333333	Two	LS
Chr6	587889	588065	DNA	0.12262572972973	0.36363636363636404	0.16111111111111098	5.03065184543009	7.02406241129027	9.690728374787131	8.67687591904468	-5.963613185620461	0.0	Two	LS
Chr6	621652	622048	Unsp	0.310648467336683	0.606060606060606	-1.26666666666667	6.622184267439589	6.50847984517192	7.91429775483701	9.59570122424883	-6.377904300558639	1.0	Two	Core
Chr6	622309	622442	Unsp	0.327842335766423	0.601503759398496	-0.252631578947368	6.33370452784325	0.0	6.9635686734597	10.3542844960096	-6.35780513121596	1.0	Three	Core
Chr6	626440	626556	Unsp	0.204220983606557	0.508620689655172	-0.4583333333333329	5.03065184543009	6.79044608117275	9.727153441905381	9.737272964732052	-6.3525901881654905	1.0	Two	Core
Chr6	636580	642102	LINE	0.00917840287769784	0.563382832307135	-0.7370052484591679	12.2678296452132	5.579200683348991	7.00283997014395	9.339607736186991	-6.2661065873726	16.719298245614034	Two	Core
Chr6	656849	656993	LTR	0.367740402684564	0.45138888888888895	-0.606060606060606	5.03065184543009	8.25777058953441	10.6133975687108	9.39978303112367	-6.009275756637	0.0	Two	Core
Chr6	656997	657228	LTR	0.43418654708520205	0.519480519480519	0.0756302521008404	5.03065184543009	7.5041410013857694	9.88702811966099	9.44034420686265	-6.0932667328749694	0.0	Two	Core
Chr6	657303	657515	Unsp	0.16878181818181798	0.580188679245283	0.40096618357487895	5.03065184543009	5.84460917537825	9.70072964491148	9.79281593274467	-6.237066050878661	0.0	Two	Core
Chr6	680615	680857	Unsp	0.21388047808764898	0.462809917355372	0.160714285714286	5.03065184543009	5.10609918380392	9.68433512954922	9.32569159574136	-6.13327048318732	0.0	Two	LS
Chr6	750882	751144	LTR	0.309663146067416	0.480916030534351	-0.8	5.9602780589618805	4.35526119840742	8.68310476255858	9.066922668814039	-5.790697578104	7.25	Two	Core
Chr6	772954	773242	Unsp	0.362312534722222	0.652777777777778	-1.13247863247863	6.2413266021793605	0.0	7.226767647969821	9.8203333638571	-6.26576026888402	0.0	Three	Core
Chr6	850560	850779	DNA	0.133009736842105	0.40639269406392703	0.494824016563147	5.09975004453444	6.3885583819957805	10.1259757168716	8.27856459340811	-4.90481626737066	20.666666666666668	Two	LS
Chr6	854809	854940	Unsp	0.426470909090909	0.47328244274809206	-0.7076023391812859	5.03065184543009	8.96870882680248	10.1876119824062	9.42621640947533	-6.25631011422082	0.0	Two	LS
Chr6	855395	855571	Unsp	0.24520894736842103	0.5227272727272729	-0.26842105263157895	5.03065184543009	7.001694393125731	10.4416529610657	9.281845048796	-6.643856189774719	0.0	Two	LS
Chr6	856355	856833	LTR	0.222751533742331	0.50418410041841	-0.06702702702702701	5.3716363458223295	5.742153122164759	9.713357088532788	9.15734804124304	-6.46876948321663	0.0	Two	LS
Chr6	862760	863406	Unsp	0.152077474150665	0.286377708978328	1.27906976744186	5.03065184543009	9.13006874195942	9.365233744780221	7.198150607965901	-4.46264117511319	2.25	One	LS
Chr6	879237	879367	Unsp	0.0603328358208955	0.515384615384615	0.10526315789473699	5.20482771781376	1.2376835713791001	8.49981037835127	9.817833478513391	-6.175907159457441	0.0	Three	Core
Chr6	907825	908024	Unsp	0.155602962962963	0.57286432160804	0.8392857142857142	5.03065184543009	7.538701175436831	9.659349450680368	9.645395382649	-6.448334872465559	0.0	Two	Core
Chr6	929504	929629	Unsp	0.0626937984496124	0.52	0.335526315789474	5.12828776107532	1.2708051148410902	9.07931849760224	10.301703474388699	-6.643856189774719	0.0	Three	Core
Chr6	1002175	1002388	LTR	0.0318181818181818	0.455399061032864	-0.6339522546419101	5.03065184543009	7.15302345629199	8.35208510274761	10.1468484664042	-5.9536653547134994	11.0	Two	Core
Chr6	1026121	1026317	DNA	0.22094666666666699	0.27551020408163296	1.33399209486166	5.03065184543009	4.75790150655118	8.67358428575392	10.171284127157302	-6.643856189774719	9.0	Two	Core
Chr6	1026828	1027014	DNA	0.247998743455497	0.231182795698925	0.8347578347578349	5.03065184543009	8.79207438554235	7.52612184429975	8.03756154337034	-3.53806152575213	7.0	One	Core
Chr6	1027014	1027332	DNA	0.10419498452012402	0.446540880503145	0.27678571428571397	5.16928288619553	8.07770768987885	6.854864130036111	9.11487247693668	-4.70703210226182	1.0	Two	Core
Chr6	1068615	1068878	DNA	0.122405190839695	0.304182509505703	0.7156511350059742	5.2023543974499	6.745883721333129	8.02922109420139	8.99013866225231	-5.4323520845810105	0.3333333333333333	Two	Core
Chr6	1081129	1081329	Unsp	0.186548479262673	0.53	0.5416666666666671	5.52616268115015	6.72481651188997	10.4243226350441	9.7017169629854	-6.3531790288718	0.0	Two	Core
Chr6	1088608	1088796	Unsp	0.207557536945813	0.51063829787234	0.645454545454546	5.15087785571597	7.83123643170269	8.963045987443481	9.87850640537091	-5.79242531541965	0.0	Two	Core
Chr6	1090095	1090371	Unsp	0.351148387096774	0.5362318840579711	-1.15402298850575	5.874208159496829	0.7111577390496591	8.62669152684019	9.59198322030829	-5.963613185620461	0.0	Three	Core
Chr6	1090430	1090583	Unsp	0.35001363636363597	0.549019607843137	-0.727941176470588	5.686868964094889	1.72480690009798	9.64778174490619	9.86206148345947	-6.229418938077201	0.0	Three	Core
Chr6	1118852	1119674	DNA	0.0877351089588378	0.36009732360097296	1.3426724137931	5.9891971079558095	7.89668812740175	8.62667164085427	8.049678299189768	-3.90984650628291	0.3333333333333333	One	Core
Chr6	1127245	1127404	LTR	0.492265732484076	0.46540880503144705	-0.393939393939394	5.03065184543009	1.68608073865002	10.386916167442	9.20174059726304	-6.643856189774719	0.0	Three	Core
Chr6	1146194	1146379	Unsp	0.23567904040404	0.459459459459459	-0.545098039215686	5.19782060273641	7.80003097616569	9.671807951575449	9.511999286408251	-6.643856189774719	0.0	Two	Core
Chr6	1147157	1147386	Unsp	0.20321215189873398	0.3624454148471621	-0.277056277056277	5.03065184543009	7.56430934975326	9.49358957352655	8.80304803127051	-6.643856189774719	0.0	Two	Core
Chr6	1181991	1182159	Unsp	0.23705220338983105	0.49404761904761896	-0.5358851674641151	5.03065184543009	0.0	9.444072998489359	9.10959520333417	-6.29536988340449	0.0	Three	Core
Chr6	1209752	1209905	Unsp	0.149542545454545	0.516339869281046	0.163398692810458	5.03065184543009	7.23695485792413	10.287241204616699	9.375635141272062	-6.03380270809074	0.0	Two	Core
Chr6	1210062	1210182	Unsp	0.210736	0.45	0.5668449197860961	5.128900853839269	7.28164865496454	10.3900044067568	9.508053786350569	-6.643856189774719	0.0	Two	Core
Chr6	1224196	1224398	Unsp	0.36090816326530606	0.48514851485148497	0.1	5.38741343639704	7.8470655236817	8.38033808887678	9.255478232087778	-6.45573919065603	0.0	Two	Core
Chr6	1231584	1231792	Unsp	0.26662224137931	0.524038461538462	0.321969696969697	5.2569363728156295	0.0	8.40820906526634	9.77691331725339	-6.643856189774719	1.0	Three	Core
Chr6	1256615	1257060	Unsp	0.292357924107143	0.5685393258426971	-0.7222222222222221	7.437182726689071	0.8393323562898349	6.126524335130481	9.476939235352711	-6.05220468004253	0.0	Three	Core
Chr6	1257106	1257401	Unsp	0.326829896907217	0.6033898305084751	-0.255060728744939	7.2210946280135	0.674409215649856	7.2386537239548305	9.689808611840538	-6.21529806805896	0.0	Three	Core
Chr6	1258347	1259085	DNA	0.125555443548387	0.32384823848238503	1.42488687782805	5.03065184543009	8.0414089786328	9.012624046855539	8.16478774337853	-5.61665804844495	8.75	One	Core
Chr6	1265958	1266064	Unsp	0.247185294117647	0.5283018867924529	-0.277777777777778	5.03065184543009	8.313072257424441	9.64863298211671	10.0073242474525	-6.643856189774719	0.0	Two	Core
Chr6	1266086	1266297	Unsp	0.167755263157895	0.5781990521327011	0.7202380952380949	5.100184687091179	0.0	9.867326021088141	9.90010923354093	-6.1242881070245705	0.0	Three	Core
Chr6	1308341	1308554	Unsp	0.169925641025641	0.563380281690141	-0.315789473684211	6.14864373180912	7.697748443005709	8.3774785229035	9.43824659837574	-6.23239414471971	0.0	Two	Core
Chr6	1309413	1309601	Unsp	0.278006403940887	0.5212765957446811	0.5	6.82895210146129	6.550851281100201	8.095496992172789	9.705924001695688	-6.24443430340549	0.0	Two	Core
Chr6	1468168	1468906	DNA	0.13983977150537602	0.319783197831978	1.48040752351097	5.03065184543009	6.659417688723071	8.60868687533303	8.24636868356918	-4.7647105846491105	2.2222222222222223	One	Core
Chr6	1504413	1504671	LTR	0.26832898876404504	0.426356589147287	-0.0994694960212201	5.42250363137279	0.0	8.87671076356509	8.85900902861731	-6.643856189774719	0.3333333333333333	Three	LS
Chr6	1519820	1519963	Unsp	0.0572129166666667	0.58041958041958	-0.587301587301587	5.03065184543009	7.13366117641227	8.88415478555588	10.1317023377241	-6.24756270518788	0.0	Two	Core
Chr6	1521808	1521936	Unsp	0.0612557575757576	0.5234375	0.325	5.17425132346575	1.91041401574743	8.84668996476777	9.74373561656524	-6.291953035441871	0.0	Three	Core
Chr6	1522320	1522457	Unsp	0.0732145714285714	0.598540145985402	-0.9326923076923079	5.328233892964191	0.0	7.02471386037403	9.96874687431286	-6.33306865249256	0.0	Three	Core
Chr6	1572015	1572192	Unsp	0.251152564102564	0.564971751412429	-0.0166666666666666	5.03065184543009	0.0	8.87735450242789	9.87178105338406	-6.117257851567559	0.0	Three	Core
Chr6	1588521	1588765	Unsp	0.163875180722892	0.39344262295082005	-0.04	6.080364864368531	1.2880839686293601	8.23415235937703	9.413912088654019	-6.14832877263551	0.0	Three	Core
Chr6	1754639	1754771	Unsp	0.0680702222222222	0.492424242424242	0.275	5.100184687091179	1.2249417298046898	8.740036158842459	9.52605212836836	-6.010690815690251	0.0	Three	Core
Chr6	1832346	1832552	Unsp	0.172467567567568	0.5485436893203879	0.434343434343434	6.630421833421	6.54387195116563	9.321071955758109	9.616841120196641	-6.643856189774719	7.666666666666667	Two	Core
Chr6	1836306	1836552	Unsp	0.2509684375	0.463414634146341	0.17647058823529396	6.63360725798086	6.302855618323781	7.73193360375684	9.643315566004599	-6.209301244119481	28.0	Two	Core
Chr6	1886496	1886623	Unsp	0.0617317557251908	0.5118110236220471	0.335526315789474	5.17425132346575	0.0	7.88690562958791	10.1364871096156	-6.643856189774719	0.0	Three	Core
Chr6	1889322	1889448	Unsp	0.0784553846153846	0.5	0.625	5.3593376276411195	1.9272579395968101	10.3143213322277	9.67990740199616	-6.643856189774719	2.5	Three	Core
Chr6	1890207	1890388	Unsp	0.13384760638297902	0.49171270718231996	0.14285714285714302	5.03065184543009	0.980664207903963	10.6466048019235	8.944682178154741	-6.07124711656513	5.0	Three	Core
Chr6	1890987	1891175	Unsp	0.212547044334975	0.5053191489361699	0.628205128205128	5.12828776107532	0.0	10.0097358342186	9.14364544935823	-6.643856189774719	5.0	Three	Core
Chr6	1892039	1892318	LTR	0.261525830388693	0.476702508960573	-0.19499341238471699	5.70661206610841	7.33164667594316	9.66758473935257	9.23725506578948	-6.643856189774719	4.5	Two	Core
Chr6	1892326	1892444	LTR	0.326135081967213	0.35593220338983095	-0.4428571428571429	5.19782060273641	1.32048354845961	10.4302297213474	9.28821109310877	-6.643856189774719	5.0	Three	Core
Chr6	1893674	1893854	Unsp	0.13175238095238098	0.516666666666667	0.148148148148148	6.640118985272981	0.0	7.9334921669591605	9.658469657547972	-6.23415871525108	0.0	Three	Core
Chr6	1922842	1923025	Unsp	0.173584179104478	0.524590163934426	0.272727272727273	5.03065184543009	0.0	9.52878673426699	9.66196720305762	-6.643856189774719	0.0	Three	Core
Chr6	2082763	2082872	Unsp	0.0728479464285714	0.504587155963303	1.8666666666666698	6.98314142152248	7.246720915882991	7.95605967674301	9.85092364509765	-4.880355557306549	0.0	One	Core
Chr6	2166905	2167316	LTR	0.257404579439252	0.18491484184914803	1.140625	5.03065184543009	7.565708741729259	7.556889593972629	6.220628234716459	-5.096368394472231	13.2	One	Core
Chr6	2167332	2169105	LTR	0.119902816901408	0.20738636363636398	1.28512666743551	5.03065184543009	8.957557518617289	8.24019531424566	6.5435908886776195	-5.59853219926524	10.842105263157896	One	Core
Chr6	2169105	2169372	LTR	0.113747111111111	0.329588014981273	1.8804713804713797	5.03065184543009	10.567885850496198	7.421582611199059	7.59612477309619	-5.4838603055761395	1.3333333333333333	One	Core
Chr6	2169437	2169588	LTR	0.151435582822086	0.49006622516556303	0.811965811965812	5.03065184543009	9.92948393671619	8.44683898832298	8.77350853586391	-6.643856189774719	0.0	One	Core
Chr6	2169589	2171358	LTR	0.161545444382337	0.210288298473714	1.28798321845969	5.03065184543009	9.07416610227875	8.138968423784661	6.159744468539589	-5.6217172125054695	14.68421052631579	One	Core
Chr6	2171366	2172919	LTR	0.08903015325670499	0.17643271088216397	1.21381495564005	5.03065184543009	9.180799466363519	7.78937587585862	4.88965422172003	-5.7693870718585805	21.41176470588235	One	Core
Chr6	2172920	2183626	LTR	0.10842403961018499	0.191854915685651	1.1581849845201202	5.03065184543009	9.596233220335131	7.769028416480481	4.922611740003339	-5.963613185620461	25.84259259259259	One	Core
Chr6	2174321	2181777	LTR	0.0872701058273777	0.18707717796493203	1.20102948296511	5.03065184543009	9.66672453376887	7.774734148634031	4.8288190329275995	-5.93837031384514	26.333333333333332	One	Core
Chr6	2183626	2183823	LTR	0.0895333165829146	0.304568527918782	1.6521739130434798	5.03065184543009	11.107405044833099	8.33880426492586	6.960363759554269	-6.643856189774719	15.0	One	Core
Chr6	2183823	2184298	LTR	0.0947128099173554	0.32631578947368395	1.16347905282331	5.03065184543009	11.021993871445	8.280461371969519	7.26904503265633	-5.93285238947247	20.8	One	Core
Chr6	2184298	2189534	LTR	0.08716051292657699	0.18407258064516102	1.18840620433854	5.03065184543009	9.858306804197731	7.69516509345164	5.201133870085901	-5.72665349022975	26.61111111111111	One	Core
Chr6	2185067	2185278	LTR	0.12617801843318	0.322274881516588	1.52	5.03065184543009	10.7479411097172	8.70351942851287	6.9078040594477494	-5.774816867657889	16.0	One	Core
Chr6	2189534	2189731	LTR	0.143847609756098	0.218274111675127	1.4	5.03065184543009	10.3986552097374	8.15589451260141	6.52559276242131	-6.643856189774719	19.666666666666668	One	Core
Chr6	2189768	2199630	LTR	0.0957550636492221	0.290132846567285	1.3405050537251102	5.03065184543009	10.3818544567775	7.85902064710082	7.026003925154929	-5.583882937742651	15.86	One	Core
Chr6	2199630	2200480	LTR	0.11744048959608301	0.19183168316831697	1.3874764595103601	5.03065184543009	9.689026722959278	7.40147178772673	5.475048252753	-5.729325531964071	18.77777777777778	One	Core
Chr6	2200480	2203292	LTR	0.083167368043088	0.268840579710145	1.3638086139638599	5.10471848180467	10.0649170132553	7.94723532303735	6.7363263324341105	-5.9251053312082895	15.413793103448276	One	Core
Chr6	2203329	2214021	LTR	0.0863444555873925	0.267789300749564	1.31811356190224	5.09975004453444	10.3224174676791	7.81937634748317	7.1592136460897	-5.37512505377141	14.064814814814815	One	Core
Chr6	2214017	2217906	LTR	0.0761885019646365	0.237883283877349	1.28971962616822	5.03065184543009	9.43144131199242	8.093464723147019	7.739107567828139	-5.33997227035712	22.025	One	Core
Chr6	2214494	2216351	DNA	0.000538213132400431	0.510500807754443	-0.40021208907741296	5.03065184543009	8.312439988046139	8.18959917278507	8.49297894523262	-6.04079545778363	30.15	Two	Core
Chr6	2218005	2218160	LTR	0.189495882352941	0.4580645161290321	1.80808080808081	5.03065184543009	11.0471253164103	8.54301279957915	7.049277202178089	-6.643856189774719	12.0	One	Core
Chr6	2218154	2218936	LTR	0.12099439414114502	0.19111709286675602	1.03030303030303	5.03065184543009	10.3516480853981	7.808664848714111	5.232348309485349	-6.643856189774719	23.22222222222222	One	Core
Chr6	2218936	2221845	LTR	0.10978072558459401	0.18803712616019197	1.26589300411523	5.03065184543009	9.82483212510697	7.70817150862984	4.936348630364	-6.06287353996611	27.5	One	Core
Chr6	2221845	2222547	LTR	0.10856949152542401	0.168091168091168	1.18039327443716	5.03065184543009	9.63491330369642	7.25893038441693	4.37973806230882	-6.643856189774719	22.0	One	Core
Chr6	2222547	2230015	LTR	0.0883176277222298	0.199036476256022	1.21877324802857	5.03065184543009	9.72554225609175	7.59290752756309	5.1169160297917005	-5.63821278202757	22.276315789473685	One	Core
Chr6	2230015	2231801	LTR	0.11663549054373501	0.21628045157456896	1.22047008034537	5.03065184543009	10.0032798360028	7.68419549049683	5.35845068240033	-5.663638801965259	23.263157894736842	One	Core
Chr6	2231814	2239158	LTR	0.100832877817979	0.232522371364653	1.2512566832701202	5.100184687091179	10.0242577021797	7.500509214119219	5.795473217376549	-5.39781622808478	18.41891891891892	One	Core
Chr6	2239158	2245877	LTR	0.0912865258502364	0.213290460878885	1.2612448950852	5.03065184543009	10.009374106456901	7.35168991480173	5.605258190863419	-6.23668080826885	20.044117647058822	One	Core
Chr6	2245877	2254217	LTR	0.0930207050669216	0.24580335731414898	1.33903175502433	5.03065184543009	10.4253347684354	7.778808421198661	6.403904135495571	-5.716145050581599	19.435294117647057	One	Core
Chr6	2254217	2261787	LTR	0.0870860450160772	0.20983164983165	1.2583374758354	5.03065184543009	9.907236644919669	7.571499966855691	5.42641958151449	-5.809217666074789	21.36842105263158	One	Core
Chr6	2261855	2267446	LTR	0.0954441624365482	0.181685781904242	1.19254986671569	5.03065184543009	9.578637657650349	7.52594228674176	4.7157787063652306	-5.97191038745893	26.29824561403509	One	Core
Chr6	2267446	2271885	LTR	0.120090262529833	0.195582329317269	1.2204110559886598	5.03065184543009	8.983258127707462	7.3015984355490104	7.70694693963454	-5.24733877846668	30.2	One	Core
Chr6	2268888	2270750	DNA	0.0037501714898177897	0.5472610096670251	-0.6251485148514849	5.03065184543009	8.09071391907267	7.516871974162759	8.83941126871332	-6.1843339532488	32.15	Two	Core
Chr6	2271885	2276534	LTR	0.10323509054326	0.21115091804747	1.27265576854465	5.03065184543009	9.51485327694751	7.67820199214692	5.16355974584356	-5.6331965240224005	27.6875	One	Core
Chr6	2276534	2282977	LTR	0.0943714014852267	0.23344449737970496	1.3173587106502198	5.03065184543009	9.77277469634226	7.69125128011102	5.96700239852821	-5.41267962854379	20.015384615384615	One	Core
Chr6	2282977	2299714	LTR	0.0988000303275374	0.29787234042553196	1.4097558008697502	5.2023543974499	9.243041993839961	7.82074166189757	8.23754743249702	-4.91233749159262	20.23076923076923	One	Core
Chr6	2288438	2295305	LTR	0.07044265158108501	0.519003931847969	-0.35821878994741796	5.03065184543009	7.02654296788982	7.644910123172059	9.07190704848769	-6.32821435773479	22.285714285714285	Two	Core
Chr6	2299714	2300447	LTR	0.12864871967655	0.252387448840382	1.2830434782608702	5.03065184543009	9.43864715258938	7.94875762138394	6.53354211936928	-4.98825814646051	18.375	One	Core
Chr6	2300447	2303575	LTR	0.10496319796954302	0.18702046035805603	1.19707237733803	5.03065184543009	9.23277252619456	7.393912161202519	4.81576485781696	-5.542558849161121	25.84375	One	Core
Chr6	2303584	2303779	LTR	0.134013819095477	0.27692307692307694	1.4	5.03065184543009	10.220537884186	8.01262965516482	6.60230593877562	-5.44303718038663	16.666666666666668	One	Core
Chr6	2303779	2303892	LTR	0.0702925	0.33628318584070804	1.5416666666666698	5.03065184543009	9.78419216795166	8.63076733454299	7.045763607313969	-6.643856189774719	17.0	One	Core
Chr6	2303892	2305712	LTR	0.0841940011580776	0.191365227537923	1.1872332859174999	5.100184687091179	9.76998195593373	7.975530465105799	5.36282885878751	-6.643856189774719	21.15	One	Core
Chr6	2305712	2318282	LTR	0.0881740374787053	0.259439707673569	1.28181840170279	6.81483031463454	9.7651899357525	7.73249308784837	6.474382905488371	-4.91385081032437	18.96825396825397	One	Core
Chr6	2310107	2317678	LTR	0.0875000589654248	0.20272090517241395	1.2238442822384399	5.03065184543009	9.700954917625179	7.67916761447428	5.20415523755224	-5.790004461220349	20.05263157894737	One	Core
Chr6	2318282	2323578	LTR	0.10334405276237801	0.182675649663138	1.16867879381135	5.03065184543009	9.5172768124436	7.5185763317298795	4.852278488737991	-5.375750794393509	24.5	One	Core
Chr6	2323578	2330754	LTR	0.0961901034287334	0.210076857386849	1.2444609854885902	5.03065184543009	9.2918924689936	7.905650491426719	5.254554269431151	-5.26743013976586	18.986301369863014	One	Core
Chr6	2330754	2332880	LTR	0.111575968342644	0.163687676387582	1.1718309859154898	5.03065184543009	8.3144785631144	7.6370269094621905	4.54931840942666	-4.97428146133863	25.681818181818183	One	Core
Chr6	2332882	2333389	LTR	0.130813825757576	0.274703557312253	1.50336134453782	5.03065184543009	8.78381504146288	8.62633656400371	6.74008608291152	-4.07873850045044	5.833333333333333	One	Core
Chr6	2333391	2333532	LTR	0.26134475862069	0.219858156028369	1.14285714285714	5.03065184543009	7.756587327586829	8.06801079560151	7.4887560413222	-6.643856189774719	3.3333333333333335	One	Core
Chr6	2367866	2367982	Unsp	0.299613492063492	0.4913793103448279	2.9	5.03065184543009	0.0	7.78817468531047	10.8103858666435	-6.643856189774719	0.0	Three	Core
Chr6	2607249	2607453	LTR	0.369120196078431	0.450980392156863	-0.770334928229665	5.03065184543009	1.84369046005521	8.40345952823232	9.24587118042502	-6.35666251101645	0.0	Three	Core
Chr6	2607970	2608115	Unsp	0.330901455696203	0.5448275862068971	-0.9047619047619051	5.100184687091179	8.12736620538818	8.6788151025163	9.56796932176883	-6.340929056817419	0.0	Two	Core
Chr6	2658425	2664298	LTR	0.00365665896843726	0.533127293799498	-0.797188626658825	5.19799905294362	5.675183150597169	6.894088800232691	9.39380913648632	-6.21401726685512	15.457627118644067	Two	Core
Chr6	2729459	2729658	Unsp	0.28628219178082204	0.47236180904522596	0.47719298245614	5.03065184543009	6.632591885431331	9.025369666883769	9.27246913432719	-6.43224849106925	16.333333333333332	Two	Core
Chr6	2730655	2730858	Unsp	0.250921891891892	0.527093596059113	0.34117647058823497	5.56359788040643	6.9152347303676605	9.12575205804661	9.70414406623784	-6.4337917974792	1.6666666666666667	Two	Core
Chr6	2730877	2731000	Unsp	0.26539844444444394	0.479674796747967	0.0833333333333334	5.75055845363442	8.71050486723333	9.60779577030774	9.7910593592886	-6.643856189774719	0.0	Two	Core
Chr6	2777404	2777683	DNA	0.147751875	0.336917562724014	0.9627586206896551	5.03065184543009	7.68971070601338	10.1700250564023	7.66046337163349	-5.39042169957111	0.3333333333333333	One	Core
Chr6	2794798	2795047	DNA	0.189776896551724	0.44176706827309203	-0.36376811594202896	5.75692218555625	7.13110320546901	7.918368704914731	9.6489730819225	-5.890361993729	0.0	Two	Core
Chr6	2795435	2795548	Unsp	0.18938470085470102	0.46902654867256605	-0.107142857142857	5.95268175940608	2.04568803745293	7.3998781656368395	10.166455477154301	-6.643856189774719	0.0	Three	Core
Chr6	2795654	2796024	Unsp	0.36737010178117	0.5783783783783779	-1.5568181818181799	6.67017216341218	6.880255094714251	7.620067808232321	9.71796637435329	-6.36429276371608	0.0	Two	Core
Chr6	2796058	2796184	Unsp	0.0965702325581395	0.42063492063492103	1.92105263157895	5.6808547401324905	9.17263129120163	8.089178351746071	10.1398746901175	-6.643856189774719	1.5	Two	Core
Chr6	2810641	2817394	LTR	0.0900203167420815	0.24673439767779398	1.22957677165354	5.1352948761526696	8.11248866432967	8.67295980256839	7.45270723931645	-4.94892554806054	23.91176470588235	One	Core
Chr6	2810962	2812819	DNA	0.000538213132400431	0.510500807754443	-0.40021208907741296	5.03065184543009	8.043360401430549	8.2500722291202	8.54924373925458	-6.19717761968608	30.95	Two	Core
Chr6	2817496	2817652	LTR	0.14248350877193	0.506410256410256	0.5	5.100184687091179	8.61094168181484	9.22514550984885	9.20451755210899	-6.643856189774719	12.0	Two	Core
Chr6	2832466	2832639	Unsp	0.218772240437158	0.5086705202312141	0.666666666666667	5.03065184543009	6.85931241843242	7.751887509342929	9.88039655512837	-6.26749623737604	0.0	Two	Core
Chr6	2850710	2850950	Unsp	0.20152024193548396	0.4416666666666671	-0.0644444444444445	5.34340494029961	0.7933422614159341	7.71297092411515	9.667303730222269	-6.30037195152091	0.0	Three	Core
Chr6	2944834	2944975	LTR	0.42160488188976397	0.5035460992907801	-1.27564102564103	5.03065184543009	8.31685193054921	7.65700898038507	10.6232774791244	-6.256833066665481	0.0	Two	Core
Chr6	2945082	2945330	DNA	0.19695703125	0.45161290322580605	-0.17113095238095197	5.03065184543009	0.0	8.899871618572499	10.2091185098809	-5.441270189289299	0.0	Three	Core
Chr6	2980051	2980263	Unsp	0.21506149122807	0.5283018867924529	1.7782608695652198	5.03065184543009	0.872132327574746	9.302534955406712	9.918721160247319	-6.40524525788015	0.0	Three	Core
Chr6	3021703	3021906	Unsp	0.19693470319634698	0.5566502463054189	1.47826086956522	5.03065184543009	0.0	8.99657073538488	9.74436033304697	-6.2399321473479805	0.0	Three	Core
Chr6	3022013	3022745	LTR	0.304013473053892	0.499250374812594	0.77	5.03065184543009	5.04951482311255	9.340695838270689	9.16997054946783	-6.28336773404038	0.0	Two	Core
Chr6	3067701	3067820	Unsp	0.282851627906977	0.5546218487394959	-0.11363636363636401	5.41334956553383	1.31313402157055	9.21361171641891	10.2550682360091	-5.500816000629509	7.0	Three	LS
Chr6	3068178	3068739	DNA	0.0626514180478821	0.508021390374332	-0.75	5.43289594419076	6.8635553933511995	9.403519100107669	9.11520406979567	-6.37731299816379	7.0	Two	LS
Chr6	3068857	3070132	LINE	0.17069175136825598	0.425882352941176	1.20486618004866	6.81773083972428	8.7025243938796	9.60461470064913	8.57401098713991	-5.0861795149747095	15.357142857142858	One	LS
Chr6	3070132	3076863	LTR	0.339416916666667	0.22671222700935997	1.2731670529375	5.03065184543009	8.800800248935529	8.971150411347061	5.95379965217363	-4.6028709256502	10.132352941176471	One	Core
Chr6	3076870	3083737	LTR	0.0702941093704671	0.518858307849134	-0.354146624319658	5.03065184543009	7.2035666482962	7.684577733758889	9.106210061436538	-6.25693020353784	22.914285714285715	Two	Core
Chr6	3083833	3085265	LINE	0.149246406685237	0.43296089385474895	1.08935381933094	5.769613674840139	7.633817934805889	8.53240101402891	8.84391069787084	-4.51334140515973	15.866666666666667	One	Core
Chr6	3090445	3090657	Unsp	0.146865321100917	0.5094339622641509	0.0	5.03065184543009	8.953900363851119	10.013619661839801	9.108977287247448	-6.17667148907055	16.0	Two	Core
Chr6	3093572	3093980	Unsp	0.131867089201878	0.21078431372548997	1.2537313432835802	5.128900853839269	8.89167329529821	8.69718020158081	6.3393002960403395	-6.643856189774719	18.6	One	Core
Chr6	3094509	3094717	Unsp	0.228816470588235	0.48557692307692296	1.125	5.03065184543009	8.62417969399894	8.16960977777478	9.17054201080726	-5.52491511705122	11.333333333333334	Two	Core
Chr6	3110834	3112691	DNA	0.000538213132400431	0.510500807754443	-0.40021208907741296	5.03065184543009	8.148371869828969	8.21418540058697	8.59862886760481	-6.3058375474705	28.68421052631579	Two	LS
Chr6	3114167	3114324	Unsp	0.232882077922078	0.503184713375796	-0.05	5.03065184543009	8.30650702324834	10.015540710866599	9.1826770663339	-6.643856189774719	0.0	Two	LS
Chr6	3118748	3118874	Unsp	0.112078	0.53968253968254	0.166666666666667	5.128900853839269	0.0	7.116557587176139	10.1995290961881	-6.115306997958831	0.0	Three	LS
Chr6	3123543	3123668	Unsp	0.12171511627907	0.536	0.263157894736842	5.19782060273641	0.0	8.993674773624779	9.9928077582925	-6.2138683490299105	0.0	Three	Core
Chr6	3144166	3144374	Unsp	0.16844160000000002	0.576923076923077	-0.29166666666666696	5.87053922861506	0.0	8.66511498922696	9.987763032668381	-6.643856189774719	9.333333333333334	Three	Core
Chr6	3159009	3159125	DNA	0.32222672131147495	0.508620689655172	-1.03296703296703	5.57684960253238	0.0	7.375311147476361	10.2104973353906	-6.643856189774719	0.0	Three	Core
Chr6	3163355	3163550	Unsp	0.24583211267605604	0.543589743589744	0.00534759358288772	5.173816680909019	0.9283743134756529	8.80010465950952	9.89229153913457	-6.09496294376109	0.0	Three	LS
Chr6	3167080	3168547	LINE	0.368939122928177	0.5126107702794821	0.494640540725063	5.532715175040259	7.0701470503596	8.99628242272634	8.95399745912169	-5.963841056811099	0.25	Two	LS
Chr6	3170505	3170740	LINE	0.21143008620689702	0.523404255319149	0.27083333333333304	5.03065184543009	6.8431026291689205	9.085346786349259	9.45090320962341	-5.901464009260841	0.0	Two	LS
Chr6	3170919	3171527	Unsp	0.182716933962264	0.332236842105263	1.33899456521739	5.03065184543009	7.5571216597939	10.132167326505199	7.579588990662639	-4.886426493048799	0.5714285714285714	One	LS
Chr6	3171546	3171709	LTR	0.287484819277108	0.331288343558282	0.975	5.03065184543009	9.17895511733958	10.0360949273448	8.69721390210273	-4.6652298405672905	0.0	One	LS
Chr6	3174939	3175117	Unsp	0.156912085561497	0.48314606741572996	0.123376623376623	5.03065184543009	7.74026913050764	9.676105778845141	9.52461103909411	-6.18491586861907	0.0	Two	LS
Chr6	3177426	3178331	Unsp	0.38594960629921293	0.535911602209945	-0.7804545454545451	5.23802762752742	7.0718634757289	8.780494422174	9.06788172578559	-6.18442457113743	0.0	Two	LS
Chr6	3179306	3179710	Unsp	0.27188720207253897	0.26485148514851503	1.2794117647058798	5.03065184543009	7.744604675851099	10.2662363111074	7.719638715939361	-6.643856189774719	14.6	One	LS
Chr6	3179710	3179979	LTR	0.18159985507246398	0.442379182156134	0.0284090909090908	5.714215655676	7.916375835495731	8.66146287137073	8.92273797705914	-5.6179277247842005	6.666666666666667	Two	LS
Chr6	3180145	3185672	LTR	0.0009038322487346349	0.5348290211688079	-0.703106978085352	17.145156278506903	5.767026796142019	6.825449844191589	9.20454021554023	-6.25176865291211	27.589285714285715	Two	LS
Chr6	3185677	3185903	LTR	0.0921684581497797	0.433628318584071	-0.365384615384615	5.219976054820321	7.263269206983121	6.96787104763641	9.52478672794275	-6.29409640771901	2.0	Two	LS
Chr6	3187726	3187848	DNA	0.31711275	0.44262295081967207	0.0	5.15012889933759	7.788523140564609	8.95908913108568	9.586084248612721	-5.9826581032264805	0.0	Two	LS
Chr6	3212526	3220009	LTR	0.0908218450479233	0.22373879298809	1.1773473609661498	5.718196611411481	8.613489878964321	9.127486610424869	5.946945720320519	-5.0575883779119195	20.907894736842106	One	LS
Chr6	3220160	3220310	LTR	0.27102209876543204	0.5266666666666671	-0.587719298245614	5.03065184543009	0.0	7.654598331530581	9.820274117265699	-6.643856189774719	0.0	Three	LS
Chr6	3229447	3229593	LTR	0.12173607594936699	0.561643835616438	-0.24285714285714302	7.91172662606853	1.1429531684774399	8.127945587693631	10.3334971914096	-6.643856189774719	0.0	Three	LS
Chr6	3259088	3259313	Unsp	0.256532602739726	0.7422222222222221	-0.4	6.8433675138298495	0.0	5.82526199711577	10.038610196688401	-6.417974782358401	5.75	Three	Core
Chr6	3259496	3259626	Unsp	0.247361439393939	0.607692307692308	-0.450980392156863	6.70597768848655	2.34329061176994	6.83371406307032	10.2039015308834	-6.28310884599683	0.0	Three	Core
Chr6	3272844	3273007	Unsp	0.267196741573034	0.52760736196319	-0.4571428571428571	5.8778442246685305	6.53806848296816	8.379075812701139	9.413912088654019	-6.35666251101645	0.0	Two	Core
Chr6	3304458	3304634	Unsp	0.23	0.534090909090909	0.527950310559006	5.03065184543009	8.0406202267717	9.050369817700119	9.67511227859766	-6.24664771798693	0.0	Two	Core
Chr6	3370294	3370479	Unsp	0.11855375	0.5081081081081079	-0.0290909090909093	5.03065184543009	0.965110787698268	9.56307853707601	9.266305371013882	-6.643856189774719	0.0	Three	LS
Chr6	3376153	3376308	Unsp	0.23399584905660398	0.6	0.14285714285714302	5.03065184543009	0.0	10.1016183262746	9.4554372249601	-6.318280317872221	0.0	Three	LS
Chr6	3379113	3379322	Unsp	0.168720973451327	0.5693779904306221	-0.0666666666666667	5.03065184543009	1.4247529848538203	9.62740616548358	9.66536158922742	-6.458163872474099	0.0	Three	LS
Chr6	3380690	3380868	Unsp	0.24957187817258897	0.556179775280899	-0.288888888888889	5.25632328005168	0.0	9.27501153331481	9.91478717346487	-6.37441745874701	0.0	Three	LS
Chr6	3380927	3381043	Unsp	0.24985795275590503	0.508620689655172	-0.4583333333333329	5.3529707897117005	1.33544980577523	8.09273588360857	9.215907348226269	-6.643856189774719	3.0	Three	LS
Chr6	3383442	3383571	LTR	0.28876755244755203	0.573643410852713	-0.671052631578947	5.100184687091179	1.24416054098098	7.86428229713698	10.431411136136301	-6.643856189774719	0.0	Three	LS
Chr6	3436881	3437067	Unsp	0.19171291666666698	0.258064516129032	1.29166666666667	5.03065184543009	8.38529016251866	9.738078644253429	7.39532042047241	-1.4455865626384499	2.3333333333333335	One	Core
Chr6	3437179	3437300	Unsp	0.0961204724409449	0.289256198347107	1.0672268907563	5.03065184543009	8.87553266370814	9.8805138057861	7.25882672315887	-3.13989341116705	13.0	One	Core
Chr6	3437404	3438041	Unsp	0.11684362951807199	0.252747252747253	1.36677367576244	5.03065184543009	8.73681265075734	8.63277719236453	6.7173022712971795	-4.34021924374485	14.428571428571429	One	Core
Chr6	3438612	3438727	Unsp	0.137423966942149	0.156521739130435	1.1304347826087	5.03065184543009	9.273413705100651	9.70018493235163	5.5317809452957905	-6.643856189774719	15.0	One	Core
Chr6	3438727	3438993	LTR	0.150769925373134	0.176691729323308	1.27906976744186	5.03065184543009	4.01851567944573	8.52241407874164	4.55257199986786	-6.643856189774719	22.666666666666668	One	Core
Chr6	3439030	3439663	Unsp	0.113560951661631	0.244865718799368	1.3170653907496002	5.03065184543009	9.223016656565939	8.38775160169768	5.98129924396916	-4.70844971628272	12.0	One	Core
Chr6	3439663	3444795	LTR	0.0522344037804142	0.2	1.2654489146331	5.03065184543009	8.74378680983623	8.58906703281913	5.3546050997927805	-3.86336938983159	19.365384615384617	One	Core
Chr6	3440086	3440861	Unsp	0.26923311827957	0.212903225806452	1.32692307692308	5.03065184543009	8.027176997370029	8.592670671017519	4.79006619603501	-3.5654498443094	21.11111111111111	One	Core
Chr6	3444832	3445026	Unsp	0.11142266009852199	0.32989690721649495	1.8095238095238102	5.03065184543009	9.520638781705369	8.58959013281752	8.3393294667031	-5.01256463799809	18.333333333333332	One	Core
Chr6	3445026	3445502	LTR	0.051792828685259	0.51890756302521	-0.37866224433388596	5.03065184543009	8.16422560837996	7.86623151100385	9.40482879104468	-6.236487911390481	15.5	Two	Core
Chr6	3445502	3451485	LTR	0.0793429033333333	0.521644659869631	-0.37921332894159004	6.59872320438753	6.64887605121186	7.69563366765823	9.063763826954462	-6.2216356502345	19.183333333333334	Two	Core
Chr6	3451485	3451961	LTR	0.051792828685259	0.51890756302521	-0.37866224433388596	5.03065184543009	7.6715168454914995	7.73208730569701	9.47934533081185	-6.130780182521759	16.166666666666668	Two	Core
Chr6	3451961	3452409	Unsp	0.0871160599571734	0.274553571428571	1.2564102564102602	5.10471848180467	8.35882150349435	9.00350214702307	7.37644101177885	-5.28630418515664	13.0	One	Core
Chr6	3452416	3457618	LTR	0.375933852729745	0.20222991157247197	1.20998695254631	5.03065184543009	8.69186140815899	8.79864343099509	5.189310014665669	-4.5518506675255495	18.32075471698113	One	Core
Chr6	3457618	3458091	LTR	0.36567321792260704	0.25369978858351	1.3223529411764698	5.03065184543009	9.30895408995945	8.65495421937059	6.6103930687145995	-4.295932886354421	7.8	One	Core
Chr6	3458091	3458254	Unsp	0.125811137724551	0.251533742331288	1.2258064516129	5.03065184543009	10.108729468050301	9.803711868807499	7.20952561705265	-6.643856189774719	21.666666666666668	One	Core
Chr6	3458252	3462834	LTR	0.082339982555604	0.200787401574803	1.225097483162	5.03065184543009	9.372801146500642	8.7047534744988	6.5673684143483	-5.05483261658764	28.595744680851062	One	Core
Chr6	3462834	3464014	LTR	0.0724880811496196	0.190677966101695	1.21028037383178	5.03065184543009	9.526779522809619	8.50929729821519	5.170423941785531	-5.03939751342777	26.384615384615383	One	Core
Chr6	3464008	3464647	Unsp	0.111861990950226	0.262910798122066	1.3432494279176201	5.03065184543009	10.1567087998783	8.901029737150411	6.3108598021196505	-5.1685557332974	27.857142857142858	One	Core
Chr6	3464684	3469696	LTR	0.0671096598639456	0.206960845245494	1.2767889492753601	5.03065184543009	9.23706386955076	8.568196875532019	5.472713195773231	-4.407841997874639	23.627450980392158	One	Core
Chr6	3468571	3469346	Unsp	0.29402550913838105	0.20258064516129	1.3155172413793101	5.03065184543009	8.24734692971548	8.5133196625728	4.98954746670391	-3.33227003910882	34.333333333333336	One	Core
Chr6	3469696	3477194	LTR	0.0878562931265044	0.21854393755887502	1.2610764727756398	5.1352948761526696	9.638550183179259	8.786892223116231	5.472941098000059	-4.9045214880804195	24.18421052631579	One	Core
Chr6	3474429	3476055	Unsp	0.0740689066339066	0.19741697416974202	1.25602177901403	5.03065184543009	9.542057048851651	8.639693784681151	5.359605116203	-5.568658295765751	27.058823529411764	One	Core
Chr6	3477279	3477915	Unsp	0.11889433534743199	0.24056603773584898	1.25731382978723	5.03065184543009	9.363666170916131	9.35702142083888	6.60378828111152	-4.82786751938332	20.5	One	Core
Chr6	3477997	3479604	LTR	0.0874271535114978	0.183469004383219	1.18387299743478	5.03065184543009	9.744006779720511	9.03620122680086	6.07115594671991	-4.33719485154067	31.22222222222222	One	Core
Chr6	3479604	3480245	LTR	0.0797370031055901	0.19032761310452398	1.11400894187779	5.03065184543009	8.82591690479933	8.952766981170921	5.81241323429083	-5.345283491553389	27.142857142857142	One	Core
Chr6	3480249	3480569	Unsp	0.14671195652173902	0.315625	0.7133333333333329	5.03065184543009	8.21451278866319	9.005233166178881	6.68691500814554	-4.33719485154067	25.75	One	Core
Chr6	3480568	3481514	Unsp	0.276231442105263	0.30655391120507397	1.4864864864864902	5.03065184543009	6.72456233354527	8.438279618302559	7.06766789758018	-4.18400291541591	28.0	One	Core
Chr6	3481516	3488381	LTR	0.07030665989553099	0.518863801893664	-0.35421490438212894	5.03065184543009	6.93304427096931	7.7127271044275	9.085285977387759	-6.2432685125686005	22.956521739130434	Two	Core
Chr6	3488381	3490630	Unsp	0.283519571810883	0.29791018230324606	1.4565249629263501	5.03065184543009	8.96883312087397	8.91143784690698	7.1397223446665	-4.79315016276681	27.041666666666668	One	Core
Chr6	3490606	3491028	LTR	0.311026329113924	0.26540284360189603	1.3606557377049198	5.03065184543009	9.27285189114337	9.29544879244004	6.78614066714069	-4.63296787363199	30.6	One	Core
Chr6	3491232	3492046	Unsp	0.274308442330559	0.27027027027027	1.3182076006806598	5.03065184543009	9.157388057836439	9.03422827369214	6.7538105966484805	-4.042176294108629	26.555555555555557	One	Core
Chr6	3492065	3493927	DNA	0.0032113290460878898	0.5477980665950589	-0.6201485148514849	7.49503216872261	7.2453539242673095	7.844799050222111	8.907633762926	-6.129232538645389	31.4	Two	Core
Chr6	3493948	3495350	Unsp	0.301875673412421	0.31312410841654803	1.4455698792715401	5.09975004453444	9.216209458546519	9.709503076141731	7.6057414356757	-4.161876245428701	28.933333333333334	One	Core
Chr6	3495350	3502246	LTR	0.0711418481561822	0.518126450116009	-0.338300653594771	5.03065184543009	7.13734628802961	7.7463648150549105	9.06195815679133	-6.225566800006121	22.928571428571427	Two	Core
Chr6	3502246	3502531	Unsp	0.263860390879479	0.23859649122807	1.64864864864865	5.03065184543009	8.80425440082833	9.31814153582388	7.793256677974759	-5.68527611715471	29.25	One	Core
Chr6	3502591	3503182	Unsp	0.10819794266441801	0.253807106598985	1.5432098765432098	5.03065184543009	9.658463742173439	8.97914954509039	6.5624204835784195	-3.6692978196962898	27.714285714285715	One	Core
Chr6	3503232	3504534	Unsp	0.304956501182033	0.31336405529953903	1.46546345811052	5.03065184543009	9.57828061101538	8.70163289214094	7.0662888271228494	-4.45043667677112	28.571428571428573	One	Core
Chr6	3504573	3505280	Unsp	0.301715138121547	0.316831683168317	1.47302833731649	5.03065184543009	9.38761950249067	8.98662453244885	7.46737421464906	-4.038659205313509	22.875	One	Core
Chr6	3505294	3507739	LTR	0.100494736411933	0.19322873658133802	1.1576851109329098	5.03065184543009	9.28385215103653	8.767725768527981	8.0026151974181	-5.14909149802515	31.346153846153847	One	Core
Chr6	3507749	3512315	LTR	0.0757794953026	0.195795006570302	1.21104190083677	5.03065184543009	9.283255466909699	8.94859214818431	5.44641428373595	-5.266358407069309	24.4468085106383	One	Core
Chr6	3512399	3513035	Unsp	0.112063903177005	0.24685534591195002	1.28421052631579	5.03065184543009	9.55573527333923	8.9325392308342	5.77494768978526	-5.114388801645269	23.75	One	Core
Chr6	3513035	3518141	LTR	0.0699372422680412	0.178642714570858	1.22167583192329	5.03065184543009	9.019788787722462	8.75972850531161	4.77387324180693	-4.7039227583467005	30.26923076923077	One	Core
Chr6	3518178	3518818	Unsp	0.136174782608696	0.2421875	1.3525883838383799	5.03065184543009	9.43739671492435	9.103769214936019	6.15362018481416	-4.886426493048799	22.75	One	Core
Chr6	3518815	3519381	Unsp	0.12468243654822302	0.24381625441696103	1.2065404475043	5.03065184543009	8.94310249525364	9.725656474758212	6.58254539196918	-4.11731037527889	17.666666666666668	One	Core
Chr7	853	7720	LTR	0.0713933217290398	0.519586427843309	-0.359096706826248	5.09975004453444	6.957722607370019	7.650985357073389	9.09740598455148	-6.240391787560919	23.228571428571428	Two	Core
Chr7	12272	12399	LTR	0.32758913043478305	0.574803149606299	-0.5634920634920629	5.03065184543009	1.25733286371152	9.097264510162821	10.6842076488189	-6.29536988340449	2.0	Three	LS
Chr7	48094	55006	LTR	0.21772887417218498	0.33232060185185197	1.44764366754888	5.03065184543009	8.69148319157499	8.82682874539558	7.5216166068445895	-4.38455645909338	3.056338028169014	One	Core
Chr7	74542	74708	Unsp	0.23580847457627102	0.5783132530120481	-1.08333333333333	6.269688795731129	0.0	7.09018767770648	9.739745885989722	-6.33373929290445	0.0	Three	Core
Chr7	223105	223313	Unsp	0.168188407079646	0.5673076923076921	-0.0802139037433156	6.2326644605635595	6.632032374283449	9.3713705982989	9.76742231609752	-6.347180886819269	4.333333333333333	Two	Core
Chr7	272983	273251	LTR	0.497759701492537	0.5410447761194029	-0.578947368421053	5.2023543974499	6.50621410511612	7.37102804133043	9.39751653562749	-6.01806517730263	0.0	Two	Core
Chr7	273243	273451	LTR	0.465675471698113	0.495192307692308	-0.8012820512820509	5.32430477172126	7.9746321749453495	6.01501289048876	9.548475762668811	-6.259426676426281	0.0	Two	Core
Chr7	340429	340608	Unsp	0.143054074074074	0.45251396648044706	0.261904761904762	5.03065184543009	0.988637801793612	10.1700695257509	9.43982066059384	-6.33473982351184	0.0	Three	Core
Chr7	359224	359389	Unsp	0.256747368421053	0.539393939393939	-0.0666666666666667	5.03065184543009	1.64923561320085	9.2719067522902	9.880310399735441	-6.29872070372604	0.0	Three	Core
Chr7	436800	437022	DNA	0.212438095238095	0.47747747747747704	-0.6125	5.293259418862379	6.9620367342736	8.17016782203361	9.35480168699986	-5.918250457773071	0.0	Two	Core
Chr7	437094	437301	Unsp	0.329391787439614	0.444444444444444	-0.447204968944099	5.03065184543009	8.19760561543202	6.5543149098219295	9.395431025403811	-6.643856189774719	0.0	Two	Core
Chr7	441931	442062	Unsp	0.09283477611940302	0.480916030534351	0.0555555555555556	5.83879564775574	0.0	7.93260058032683	9.855069276164741	-6.643856189774719	0.0	Three	Core
Chr7	442134	442310	Unsp	0.19386505208333302	0.556818181818182	0.3	5.03065184543009	6.92055685902056	8.55671786693845	9.7184822347387	-6.4388744519870995	0.0	Two	Core
Chr7	451115	451313	Unsp	0.21775787037037	0.515151515151515	1.17105263157895	5.03065184543009	7.0512393735996	9.18635290820549	9.476204068362689	-4.93336280696971	0.0	One	Core
Chr7	480571	480748	Unsp	0.154856516853933	0.5028248587570621	-0.36057692307692296	5.10471848180467	7.96505677980778	8.71201734674226	10.1316614901418	-6.22518011343253	3.3333333333333335	Two	Core
Chr7	596440	596808	DNA	0.250103272727273	0.438405797101449	-0.274247491638796	5.03065184543009	1.28226900014041	8.40330877267841	9.29278981826694	-6.643856189774719	0.0	Three	Core
Chr7	671482	671614	Unsp	0.0921137777777778	0.477272727272727	0.0555555555555556	6.102594178429719	0.0	7.716055075954599	9.95828444189743	-6.08637442547568	0.0	Three	Core
Chr7	779063	779254	Unsp	0.21492367149758498	0.56020942408377	0.267676767676768	5.5217462267719295	7.94960685141312	8.126135194189809	9.511909547143679	-6.643856189774719	0.0	Two	Core
Chr7	794693	794914	Unsp	0.165491818181818	0.5837104072398189	0.916666666666667	5.03065184543009	0.845105966824197	8.5469795634291	9.325270744838571	-6.30078228601581	0.0	Three	Core
Chr7	796542	796675	DNA	0.18635992907801396	0.37593984962406	0.47272727272727294	5.03065184543009	1.21867443368708	10.513139352671	8.60325209857198	-5.976431528861601	0.0	Three	Core
Chr7	816297	816456	DNA	0.331157625	0.47169811320754707	0.325	5.03065184543009	7.13670668873459	9.64907080903833	9.85795624611359	-6.643856189774719	0.0	Two	Core
Chr7	816658	816839	DNA	0.31262064864864897	0.46961325966850803	1.06535947712418	5.03065184543009	8.02730218049974	9.73356957675527	9.39566032153988	-6.250462369840241	0.0	Two	Core
Chr7	853367	853495	Unsp	0.0621019847328244	0.4921875	1.6666666666666698	5.9499356710215405	1.25070987568727	5.036710294600691	10.2112913010857	-5.903022778168809	5.0	Three	Core
Chr7	853510	854087	LTR	0.30069393782383397	0.5441941074523401	-1.01862348178138	5.768281551894259	5.86259289093633	4.79946520483506	9.56927854052003	-6.1673299210929295	16.333333333333332	Two	Core
Chr7	854101	854229	Unsp	0.0701923664122137	0.4921875	1.61111111111111	6.1473292042372405	1.25070987568727	6.26870692853825	9.92627409209763	-5.59588815659112	5.0	Three	Core
Chr7	937776	937974	Unsp	0.21285336405529998	0.55050505050505	-0.0277777777777779	5.03065184543009	7.52522060581954	8.68101596312095	9.13216713813223	-6.44454738155132	0.0	Two	Core
Chr7	1201683	1201793	Unsp	0.296425	0.46363636363636407	-0.452380952380952	5.64124242211213	1.38261533025196	8.12047193871376	9.48858168072182	-6.643856189774719	0.5	Three	Core
Chr7	1418959	1419150	Unsp	0.326279014778325	0.534031413612565	-0.294117647058824	5.03065184543009	0.0	10.0346507657105	9.12072522099529	-6.2306142041575	0.0	Three	Core
Chr7	1442883	1443083	Unsp	0.23852133333333303	0.445	-1.57142857142857	5.312094263902	0.9110691610691891	7.01170611023157	8.90598111926512	-6.643856189774719	0.0	Three	Core
Chr7	1464813	1465003	Unsp	0.20986666666666698	0.542105263157895	-0.33333333333333304	5.65812217482393	0.0	7.66363977015121	9.24776283181725	-6.34283219805967	0.0	Three	Core
Chr7	1548713	1548927	Unsp	0.310294932735426	0.425233644859813	-0.3	5.03065184543009	0.0	7.77349130622653	9.431467242100108	-6.25787472377996	0.0	Three	Core
Chr7	1619287	1619921	LTR	0.457933220910624	0.536277602523659	-0.616063919259882	5.17425132346575	6.789316364108031	7.8732645683708204	9.01942354046778	-6.539607527148029	0.0	Two	Core
Chr7	1816758	1817014	DNA	0.115001081081081	0.3125	0.487684729064039	5.20482771781376	0.754534661821285	7.542068688922269	8.2206243864435	-4.10301624228588	0.0	Three	Core
Chr7	1902323	1902571	Unsp	0.15856442687747	0.43145161290322603	0.0	5.19799905294362	6.36761980401618	7.72511881653229	9.65191598575985	-6.643856189774719	0.0	Two	Core
Chr7	1944454	1944928	LTR	0.263160330578512	0.291139240506329	1.1230158730158701	5.19782060273641	7.97385194482365	8.89870817983941	7.13236733181591	-4.6746773665201	3.5	One	Core
Chr7	1944928	1945151	LTR	0.34101659388646305	0.201793721973094	1.175	5.03065184543009	8.09840477706738	9.08959907047134	6.14423386374073	-4.599462070416269	14.333333333333334	One	Core
Chr7	1945126	1945761	Unsp	0.0989714501510574	0.302362204724409	1.49076086956522	5.03065184543009	9.52320986588733	8.092264532883249	6.97969796549876	-4.69835672026589	9.142857142857142	One	Core
Chr7	1945826	1955669	LTR	0.10151516965461399	0.281316671746419	1.34012974145407	5.03065184543009	9.414338305286948	8.21048920740541	6.735818005416	-5.22947748544814	20.88888888888889	One	Core
Chr7	1955689	1961004	LTR	0.399309274040289	0.183443085606773	1.20630386952221	5.03065184543009	9.742357385278211	7.69959724234887	4.7939057143538	-5.7841537825675	20.545454545454547	One	Core
Chr7	1961004	1968569	LTR	0.0824898257227776	0.193373166757197	1.20771537865213	5.100184687091179	9.75085171536834	7.489271708313461	4.86426228387693	-5.70971956620266	24.276315789473685	One	Core
Chr7	1968569	1975941	LTR	0.0869313924225664	0.20152883947185501	1.20968889547107	5.03065184543009	9.65567854228255	7.61218315230134	5.0319678460613	-5.666169378368781	22.893333333333334	One	Core
Chr7	1975941	1980919	LTR	0.0931424173080924	0.209788747124033	1.26969696969697	5.03065184543009	9.631956055711841	7.56073835282463	5.469388339094981	-5.9408055732178	21.11764705882353	One	Core
Chr7	1980919	1982593	LTR	0.0952010259433962	0.272401433691756	1.4314248746563203	5.10471848180467	10.300430440515198	8.31003536736937	6.572714337209639	-6.25578573809615	12.705882352941176	One	Core
Chr7	1982593	1983696	LTR	0.10017047111111099	0.31187669990933803	1.5033422459893	5.03065184543009	11.0655742102913	8.13614613708233	7.355809495996209	-5.42693370879524	15.833333333333334	One	Core
Chr7	1983696	1984983	LTR	0.10604856374808	0.202020202020202	1.20555760029444	5.03065184543009	9.71210107797184	7.51257099599737	5.898279123343179	-5.77075106462435	24.5	One	Core
Chr7	1984986	1988959	LTR	0.0903085831622176	0.231663223140496	1.23422140560404	5.03065184543009	10.0277770954331	7.4790439385926195	5.6770744638565	-5.7945748895975395	17.097560975609756	One	Core
Chr7	1989061	1989208	LTR	0.188322125	0.442176870748299	2.2916666666666696	5.03065184543009	9.8458634551801	8.03443791710391	7.207561338539669	-6.643856189774719	16.333333333333332	One	Core
Chr7	1989207	1990518	LTR	0.0951009379727685	0.189168573607933	1.18627802690583	5.03065184543009	9.95738918706595	7.32156579165303	5.32502715445774	-5.75831491435964	23.714285714285715	One	Core
Chr7	1990625	1991276	Unsp	0.11258457902511099	0.27342549923195103	1.4441354903943402	5.100184687091179	10.6703189672207	8.12929114923987	6.832504511369151	-6.10123063561103	2.5714285714285716	One	Core
Chr7	1991252	1991868	Unsp	0.232519537480064	0.256493506493506	1.25	5.03065184543009	9.67757663725351	8.41494634038457	7.113428156621751	-5.35150121027071	2.5714285714285716	One	Core
Chr7	1991868	2001848	LTR	0.0931218005906915	0.242563630788102	1.2856991966200402	5.03065184543009	9.93012695154579	7.82724262761426	6.19832205598073	-5.6033436366512	16.762376237623762	One	Core
Chr7	1992731	1992928	LTR	0.112252663316583	0.4467005076142129	0.8684210526315791	5.03065184543009	10.410074125127199	7.84876028026286	7.88210404291407	-5.95812297044866	13.666666666666666	One	Core
Chr7	2001848	2002167	LTR	0.10179704968944099	0.304075235109718	1.57142857142857	5.03065184543009	9.931862155926689	8.40361029963454	7.46754715538501	-5.61410884638067	2.0	One	Core
Chr7	2002169	2002502	LTR	0.154055015384615	0.22910216718266302	1.1985294117647098	5.03065184543009	9.83351386064283	8.5677652157992	6.899159657775019	-2.57437108945344	6.6	One	Core
Chr7	2006167	2006294	LTR	0.0936848854961832	0.307086614173228	1.6666666666666698	5.03065184543009	10.282541552743599	9.203466587418589	7.706741076887231	-6.643856189774719	2.0	One	Core
Chr7	2006294	2008166	LTR	0.215111517467249	0.256256800870511	1.38875323714391	5.03065184543009	9.966445880184981	7.72629023951382	6.092744646089469	-5.27064941101212	8.35	One	Core
Chr7	2008166	2009648	LTR	0.131340746371804	0.167567567567568	1.08558238636364	5.03065184543009	9.21588785114452	7.30900839463351	4.435403543350629	-5.06209257072089	25.0	One	Core
Chr7	2009648	2012560	LTR	0.0958783818181818	0.181486548107615	1.2308323860048	5.03065184543009	9.676791774980119	7.657933332322	5.24607856456891	-5.49842575025316	18.366666666666667	One	Core
Chr7	2010175	2010814	Unsp	0.11947332833583199	0.311424100156495	1.40592515592516	5.03065184543009	10.452534766565	7.693665535374469	6.3108598021196505	-6.07863308406997	4.5	One	Core
Chr7	2012563	2020134	LTR	0.091400670624747	0.202902482029025	1.20493770243753	5.03065184543009	9.69625331739154	7.4503357956126	4.7664173577693	-5.8106364785367095	24.558441558441558	One	Core
Chr7	2020134	2020817	LTR	0.0676853735632184	0.18008784773060002	1.2422731804586202	5.03065184543009	9.236441569457279	7.39865916951833	5.799798384822769	-6.643856189774719	26.25	One	Core
Chr7	2020854	2021491	Unsp	0.0910433383685801	0.279434850863422	1.31877990430622	5.03065184543009	10.4090544108878	7.13475738357136	6.3707839417763905	-5.407558166413059	15.571428571428571	One	Core
Chr7	2021479	2026782	LTR	0.0883710949043379	0.181126331811263	1.2174386406545	5.03065184543009	9.48216151108951	7.446593908897199	4.70066245235008	-5.54231816331266	27.35185185185185	One	Core
Chr7	2026782	2028650	LTR	0.0623136166756903	0.221248630887185	1.3015823766677	5.03065184543009	9.456132912166359	8.020425233078411	5.64702899142391	-6.01209947757463	18.6	One	Core
Chr7	2028687	2029328	Unsp	0.0961708370702541	0.258970358814353	1.33229036295369	5.03065184543009	9.820400346208949	8.02194514904149	5.5889919517835	-5.9536653547134994	14.875	One	Core
Chr7	2029328	2030853	LTR	0.127481277561608	0.14839133289560097	1.16482813749001	5.03065184543009	9.03399429538499	7.30947228520238	3.7826039791160095	-5.515714094234331	28.25	One	Core
Chr7	2030853	2038178	LTR	0.127217272727273	0.23941958887545298	1.19866975130133	5.17425132346575	9.004322419831631	7.874353315471231	5.526374557093081	-5.51261165649647	13.121621621621621	One	Core
Chr7	2031194	2031831	Unsp	0.0841206325301205	0.276295133437991	1.3930799773114	5.03065184543009	10.1698855780877	8.153610878941361	6.52539330270347	-6.08197730216661	6.0	One	Core
Chr7	2031868	2036989	LTR	0.0564549192100539	0.2088772845953	1.2823780817725199	5.03065184543009	8.89526342256666	7.90368926683112	5.0349468454650195	-5.65337896389323	15.23076923076923	One	Core
Chr7	2036989	2037624	Unsp	0.11553708459214501	0.261417322834646	1.36860465116279	5.03065184543009	8.36932745188461	8.207673236608711	6.126523766539051	-5.82553014989612	12.625	One	Core
Chr7	2100185	2100301	DNA	0.13953903225806502	0.422413793103448	0.173611111111111	5.22494449209055	7.81352852984619	8.71842500675381	9.22425679735159	-6.643856189774719	0.0	Two	Core
Chr7	2100308	2100697	DNA	0.142340628930818	0.47619047619047605	0.583979328165375	5.55159522284207	7.22897731629167	6.771418997360961	8.840074203013	-6.479549694887821	0.0	Two	Core
Chr7	2100793	2101013	DNA	0.26058219730941695	0.477272727272727	-0.815217391304348	5.09975004453444	6.70327076682534	7.80780514241524	9.173301381236689	-6.365015459983519	0.0	Two	Core
Chr7	2201107	2201355	Unsp	0.1309348	0.435483870967742	0.0280172413793103	6.5416223313466295	0.773440383055268	7.42414612838713	9.616913136072249	-6.643856189774719	0.6666666666666666	Three	Core
Chr7	2204903	2205143	DNA	0.2332576	0.4833333333333329	-0.666666666666667	5.45615817772893	0.0	6.27551555898313	9.65843653128034	-6.643856189774719	0.0	Three	Core
Chr7	2315778	2316060	LTR	0.43916704545454494	0.5283687943262411	0.411411411411411	5.03065184543009	0.0	6.576374113804509	9.34911494223927	-6.2407273843309605	0.0	Three	Core
Chr7	2385220	2385463	Unsp	0.15768572	0.44032921810699605	0.133333333333333	5.3561391795535895	1.2916000084504398	7.072654350383461	8.89180734470006	-6.35376548551067	0.0	Three	Core
Chr7	2405353	2405475	Unsp	0.192202109375	0.47540983606557397	0.274725274725275	5.61794136893229	0.0	4.83762096015971	9.4233031710478	-6.643856189774719	0.0	Three	Core
Chr7	2547349	2547472	Unsp	0.106061181102362	0.504065040650406	0.0588235294117647	5.79394811935347	0.0	6.2731566401142	9.7910593592886	-6.643856189774719	0.0	Three	Core
Chr7	2547866	2547993	Unsp	0.0957990769230769	0.551181102362205	-0.144736842105263	5.100184687091179	0.0	8.51728405040028	9.37869262835157	-6.643856189774719	0.0	Three	Core
Chr7	2745700	2745904	DNA	0.16280572815534	0.480392156862745	0.39560439560439603	5.84935140349167	2.62726597538988	7.625733909114691	9.12981750275611	-6.643856189774719	0.0	Three	Core
Chr7	2812139	2817661	LINE	0.00917840287769784	0.563382832307135	-0.7370052484591679	12.2681074266698	5.599172242357151	6.98953127220412	9.322861811787678	-6.22508597161955	16.982142857142858	Two	Core
Chr7	2843811	2843950	Unsp	0.209692657342657	0.5035971223021579	-0.28333333333333305	5.57822445955959	1.1824494386837	7.0461320553522	9.80656274364735	-6.12111620413643	0.0	Three	Core
Chr7	3041149	3041315	Unsp	0.34161236994219707	0.469879518072289	0.196172248803828	5.03065184543009	7.22555176217996	8.20430008975075	9.43337734574331	-6.643856189774719	0.0	Two	Core
Chr7	3042381	3042580	Unsp	0.304164516129032	0.562814070351759	-0.383838383838384	5.85080983169971	6.95418518686998	8.71087190030112	9.670455303866529	-6.4368117327717105	0.0	Two	Core
Chr7	3054129	3054235	DNA	0.0676457943925234	0.47169811320754707	0.166666666666667	5.471038502010731	0.0	7.9870549049810196	9.07089124518405	-6.244989981167031	0.5	Three	Core
Chr7	3054240	3054879	Unsp	0.16640158850226902	0.264475743348983	0.937569676700111	5.09975004453444	8.44115920845999	8.705487984938541	7.1583170642247405	-4.04375509221565	25.571428571428573	One	Core
Chr7	3054962	3055599	Unsp	0.14414637048192802	0.20094191522763	1.18263239875389	5.03065184543009	9.341933111871072	8.9753208857268	5.00918606605153	-5.32624108775844	30.714285714285715	One	Core
Chr7	3055599	3060052	LTR	0.0808719750807568	0.158089939731108	1.14230769230769	5.03065184543009	8.66365523035278	8.06728913336247	3.98183464815448	-4.548333578730429	35.91304347826087	One	Core
Chr7	3060056	3060694	Unsp	0.19480093233082701	0.41536050156739796	0.501978518937253	5.25632328005168	9.45949205103668	8.35469684102729	7.2925708969412195	-5.11652050663562	8.0	One	Core
Chr7	3060690	3061388	LTR	0.0617348523206751	0.19054441260745	1.38655462184874	5.03065184543009	9.011406547120949	9.15554504017795	5.332470669962	-3.18442457113743	19.625	One	Core
Chr7	3061425	3062068	Unsp	0.102058154761905	0.27527216174183505	1.4601307189542498	5.03065184543009	9.20441608480045	8.85924478004595	6.737709548793711	-3.97857452454183	21.428571428571427	One	Core
Chr7	3062079	3062363	Unsp	0.157105860805861	0.25352112676056304	1.17543859649123	5.03065184543009	10.023892521001	9.00360366775845	6.65220881763584	-3.3088719420619204	32.5	One	Core
Chr7	3062881	3063332	LTR	0.21366612419700198	0.470066518847007	0.015625	5.03065184543009	9.19043100167259	8.45649388595986	8.64907000110258	-4.91978882282792	26.0	Two	Core
Chr7	3065081	3065551	LTR	0.23670951271186397	0.42978723404255303	0.908730158730159	5.03065184543009	7.436450551413371	8.62221886798903	8.20295652947754	-5.14838600641428	27.833333333333332	One	Core
Chr7	3065568	3065727	Unsp	0.306469772727273	0.427672955974843	1.08928571428571	5.03065184543009	8.50185155300257	8.79329750143294	8.10236715819491	-4.95580019608947	31.333333333333332	One	Core
Chr7	3065801	3066236	LTR	0.125538801843318	0.209195402298851	1.45454545454545	5.03065184543009	9.54660757289104	8.292711935043071	6.06282288157183	-3.47393118833241	37.8	One	Core
Chr7	3066230	3066519	Unsp	0.136208085106383	0.321799307958477	1.00320769847634	5.03065184543009	9.27967035874573	8.864019907993312	6.522947680538031	-3.42146376843828	30.25	One	Core
Chr7	3066558	3069751	Unsp	0.26052517940717607	0.25963044159098	1.3557201975704198	5.03065184543009	8.99804778486333	8.62595042845727	6.07472018523569	-4.14816102715066	30.727272727272727	One	Core
Chr7	3069761	3070149	LTR	0.31075527027027006	0.21907216494845397	1.3125	5.03065184543009	9.470710782297449	8.87531103141791	5.6796496180266	-3.91402005966662	33.8	One	Core
Chr7	3070353	3071218	Unsp	0.2400382	0.21849710982659	1.26666666666667	5.03065184543009	8.36951163561563	8.79170594937934	5.95652033362242	-4.48674532391375	32.4	One	Core
Chr7	3071239	3078106	LTR	0.07044265158108501	0.519003931847969	-0.35821878994741796	5.03065184543009	7.16637577968181	7.68188297771543	9.0315187475449	-6.270932063686909	22.7	Two	Core
Chr7	3078106	3079788	Unsp	0.26225695702671303	0.247324613555291	1.36981566820276	5.03065184543009	8.9897688943179	8.441044391336629	6.58731862584878	-4.51178655207542	33.35294117647059	One	Core
Chr7	3079850	3080439	Unsp	0.102766632825719	0.23259762308998302	1.47727272727273	5.03065184543009	9.533643799547699	8.41404638554579	5.530672583802769	-4.94466393824044	28.857142857142858	One	Core
Chr7	3080489	3081791	Unsp	0.26359698275862103	0.264976958525346	1.38137254901961	5.03065184543009	9.181462824575132	9.012057242959461	6.18984161817853	-5.01483850897563	31.357142857142858	One	Core
Chr7	3081830	3082537	Unsp	0.28469262295082	0.302687411598303	1.2572359593636202	5.03065184543009	9.59257083135968	8.710508282403389	7.00066912989385	-4.463705517712361	22.75	One	Core
Chr7	3082553	3082658	LTR	0.178119724770642	0.28571428571428603	1.56730769230769	5.03065184543009	9.75415072754124	9.703933096638869	7.1901058196585	-6.643856189774719	26.0	One	Core
Chr7	3082658	3082914	LTR	0.282619	0.313008130081301	1.18831168831169	5.03065184543009	8.836763610355481	9.321526819533052	8.1353441807498	-4.68608442516402	31.75	One	Core
Chr7	3082742	3082851	Unsp	0.117711929824561	0.256880733944954	1.3529411764705903	5.03065184543009	9.41781855596256	9.66119559068445	8.20464364058683	-4.274622380109	32.5	One	Core
Chr7	3083173	3083603	Unsp	0.15660886917960098	0.21860465116279104	1.2086956521739098	5.03065184543009	9.454975926230821	9.40012598884576	6.1931266249735595	-6.643856189774719	29.166666666666668	One	Core
Chr7	3083604	3084240	Unsp	0.138126610942249	0.24213836477987397	1.29700977573318	5.03065184543009	9.55202807432422	8.872474341065882	5.98884572873012	-5.21361628385221	35.0	One	Core
Chr7	3084233	3085289	LTR	0.0605950561797753	0.20454545454545497	1.3559829059829098	5.03065184543009	9.61385781428558	8.54152270844177	5.480342362178449	-3.42146376843828	32.54545454545455	One	Core
Chr7	3085270	3085926	Unsp	0.13049793814433	0.25609756097561	1.39827201783724	5.03065184543009	9.76100951424942	9.313569487697741	5.87205430891157	-4.70930925126334	26.5	One	Core
Chr7	3085963	3095476	LTR	0.0716677508650519	0.19930069930069896	1.3287976729153201	5.03065184543009	9.45061501226341	8.46394150032649	5.39583123194887	-4.34021924374485	25.5	One	Core
Chr7	3086211	3093722	LTR	0.0807820265076209	0.20690574590054697	1.23470860876833	5.03065184543009	9.51311195172133	8.453132933208849	5.43920633858274	-4.9157866339997	24.763157894736842	One	Core
Chr7	3095576	3098551	LTR	0.0774442842605156	0.158145875937287	1.1237191481778501	5.03065184543009	9.202727072298071	8.298096151246671	4.06597512204101	-5.14057748664728	37.16129032258065	One	Core
Chr7	3098551	3099051	Unsp	0.126057142857143	0.21	1.23529411764706	5.03065184543009	9.81636695591392	8.41739129632758	5.92260977027334	-4.86185684199402	31.5	One	Core
Chr7	3099051	3099572	LTR	0.283909513108614	0.21113243761996203	1.15322580645161	5.03065184543009	9.24910757104924	8.349154331700401	6.38261941739969	-4.36070386793752	33.833333333333336	One	Core
Chr7	3099572	3100280	Unsp	0.262542750352609	0.261299435028249	1.25496155909172	5.03065184543009	9.65713891865064	9.14202845889396	6.478034523739001	-3.59339485493398	23.75	One	Core
Chr7	3100336	3101635	Unsp	0.265791127063891	0.24711316397228603	1.38057784911717	5.03065184543009	10.0504983768685	8.66220423430056	6.2751632427318205	-4.38724479368964	29.714285714285715	One	Core
Chr7	3101896	3102531	Unsp	0.0985724886877828	0.26771653543307106	1.29254529254529	5.03065184543009	10.321880540898	8.75119409014113	6.70458666682634	-5.31976025820465	22.875	One	Core
Chr7	3102531	3107683	LTR	0.0547140897359539	0.20267839296422102	1.3099132668098201	5.03065184543009	8.93620340682019	8.36680293173067	5.35457438696267	-4.148372009169299	19.192307692307693	One	Core
Chr7	3102944	3103719	Unsp	0.261533778371162	0.23096774193548397	1.2969696969697	5.03065184543009	8.81268233453759	8.11415210725232	5.47862911107491	-5.35150121027071	14.11111111111111	One	Core
Chr7	3107687	3108324	Unsp	0.11388618759455399	0.32182103610675	1.35368421052632	5.03065184543009	9.38477431057008	9.06958715205188	7.29482305767749	-4.88122571221517	14.0	One	Core
Chr7	3108311	3111415	Unsp	0.20149683844451502	0.196842783505155	1.2605837789661298	5.03065184543009	9.255245091402891	8.58495970874474	5.16674655465814	-4.950870849734559	30.5	One	Core
Chr7	3112017	3115209	Unsp	0.24452243376463298	0.201754385964912	1.24380952380952	5.03065184543009	8.41680159585418	8.09182962239918	4.83864879119667	-5.262972687580019	29.848484848484848	One	Core
Chr7	3115213	3115534	Unsp	0.128325318471338	0.277258566978193	1.2669220945083	5.03065184543009	9.66512474251947	8.6045475649672	6.476813068015231	-3.86095431144166	30.25	One	Core
Chr7	3115532	3116028	LTR	0.320200515463917	0.19153225806451604	1.1480769230769199	5.03065184543009	9.53355943177518	9.15500505915993	4.7365764960467	-4.312650281299351	26.833333333333332	One	Core
Chr7	3116112	3116748	Unsp	0.150428330827068	0.356918238993711	1.17087912087912	5.100184687091179	8.24510100759101	8.60971480677953	7.4748826452106	-5.1595876886730405	11.142857142857142	One	Core
Chr7	3117076	3117253	Unsp	0.21715149171270698	0.41242937853107303	1.78095238095238	5.100184687091179	7.761701487243509	8.47350621679531	9.289322624051	-4.643856189774719	20.666666666666668	One	Core
Chr7	3117249	3117358	DNA	0.0913728571428571	0.513761467889908	0.14285714285714302	5.35302093846935	7.4874529885117305	7.67517082144394	10.1919338551935	-5.93285238947247	2.5	Two	Core
Chr7	3160861	3161117	DNA	0.11057297297297301	0.30078125	0.94	5.03065184543009	7.47790826032817	7.56849714700515	8.86544925585136	-6.643856189774719	0.5	Two	Core
Chr7	3197201	3198051	DNA	0.141010378250591	0.342352941176471	1.4188316800503897	5.100184687091179	6.99906338597133	8.787483760953139	8.5722150185664	-5.7503907353668895	1.6666666666666667	One	Core
Chr7	3211381	3212421	LTR	0.249956339869281	0.283783783783784	1.3547619047619	5.68010468738566	7.154627116360491	8.79097036095591	8.20906513100096	-5.86838942622561	7.416666666666667	One	LS
Chr7	3211464	3211890	Unsp	0.105037472035794	0.295774647887324	1.4125	5.03065184543009	7.93209022112252	9.024421160297038	7.85016584706435	-3.59726562993991	3.0	One	LS
Chr7	3212209	3212710	Unsp	0.231937915057915	0.28942115768463106	1.18319327731092	5.7501166250814295	8.245114127422099	9.031391993053019	7.38294875619851	-4.76095023470995	3.6666666666666665	One	LS
Chr7	3213042	3213235	Unsp	0.197621990521327	0.5129533678756479	1.5645933014354099	5.03065184543009	7.2086596379328896	8.88651447167742	9.37184927745765	-4.44109257518721	0.0	One	LS
Chr8	77	505	LTR	0.11775107551487402	0.27803738317757	1.5740740740740702	5.03065184543009	8.501810210612481	11.271878190287099	7.819874596761889	-5.67413177301656	29.666666666666668	One	LS
Chr8	27027	27234	Unsp	0.16098367713004502	0.579710144927536	0.0647058823529412	7.811130002735231	6.35401958582646	10.362381005606698	9.54804529713539	-6.643856189774719	0.3333333333333333	Two	LS
Chr8	31617	31858	DNA	0.25306876494023894	0.419087136929461	-0.310769230769231	5.100184687091179	7.72279882689098	10.3960843267377	8.93333908158529	-6.643856189774719	0.0	Two	LS
Chr8	32029	32235	Unsp	0.156484753363229	0.5533980582524269	-0.5049019607843139	5.22494449209055	7.3596783820677105	10.352469132087599	9.59171995966796	-6.643856189774719	0.3333333333333333	Two	LS
Chr8	100510	107339	LTR	0.293860873942223	0.273246448967638	1.37096533173939	5.03065184543009	8.49117591446694	8.90442756031633	6.718189258144599	-4.02213542991845	4.869565217391305	One	Core
Chr8	180119	180260	Unsp	0.22252067796610198	0.5602836879432621	-2.375	5.16928288619553	0.0	7.505799891751651	10.589166691455999	-5.94109665276928	0.0	Three	Core
Chr8	180302	180552	DNA	0.23547866666666697	0.436	0.293939393939394	5.03065184543009	0.0	8.26675956761832	10.339152639093	-5.561617928867889	0.0	Three	Core
Chr8	246236	252109	LTR	0.00365665896843726	0.533127293799498	-0.797188626658825	5.100184687091179	5.810961347846071	6.90133050548347	9.36126177436902	-6.293599805090199	16.0	Two	LS
Chr8	274892	275210	Unsp	0.28066666666666695	0.6257861635220129	-0.891666666666667	8.490430585524079	1.07410028167639	6.31681835818416	9.639058931106199	-6.25994120799166	0.0	Three	Core
Chr8	332366	332639	LTR	0.276934057971015	0.48351648351648396	-0.394428152492669	6.2167423929588	6.683342922029821	9.27594622418133	9.572277560676142	-6.345951324093879	0.0	Two	Core
Chr8	332840	333104	LTR	0.441338841698842	0.568181818181818	-0.9449275362318841	6.7532009069845795	8.20679365453581	8.92903664639389	9.393593597113131	-6.13851085711694	0.0	Two	Core
Chr8	365136	365318	Unsp	0.23951984924623101	0.538461538461538	-0.3	5.52748735342767	1.55384801115244	8.46922347491177	9.91243355923224	-6.2699485664557395	0.0	Three	Core
Chr8	422038	423895	DNA	0.000538213132400431	0.510500807754443	-0.40021208907741296	5.03065184543009	8.00729236437696	8.26480256319182	8.52599640482772	-6.4030615452906	28.736842105263158	Two	LS
Chr8	470206	470413	Unsp	0.164491466666667	0.565217391304348	-0.4166666666666671	5.10471848180467	0.8879313003271491	8.641593267788531	9.54804529713539	-6.19072985450779	8.666666666666666	Three	Core
Chr8	478320	478533	Unsp	0.16394545454545498	0.5727699530516429	0.25454545454545496	5.2433495225700995	7.559216556038099	8.48485433544885	9.74251954154366	-6.2288186904958796	10.0	Two	Core
Chr8	514891	515047	LTR	0.152768154761905	0.5192307692307689	0.32967032967033	5.10471848180467	7.54210786422027	8.94555405995041	9.456666848873471	-5.643856189774719	6.666666666666667	Two	Core
Chr8	515162	515923	LTR	0.241156511111111	0.36904761904761896	1.34212261041529	5.128900853839269	6.76368056002436	9.021977315219289	7.673559073790469	-4.779582838964469	12.88888888888889	One	Core
Chr8	515923	516079	LTR	0.149542545454545	0.532051282051282	0.44871794871794896	5.74999561750996	7.3654788769246196	8.05686635237181	9.74627813403878	-5.4323520845810105	3.0	Two	Core
Chr8	520855	521033	Unsp	0.0976028877005348	0.48876404494382003	0.615384615384615	5.09975004453444	8.03521754164425	9.511207226292711	9.567880518156	-6.643856189774719	0.0	Two	LS
Chr8	523881	524081	Unsp	0.32410792270531397	0.53	0.36363636363636404	5.03065184543009	6.638205896663379	10.0968519839908	9.35143696396179	-6.397905938566481	0.0	Two	LS
Chr8	586548	586808	LTR	0.21979473684210502	0.465384615384615	-0.14285714285714302	5.8229601393160095	7.676798144475991	8.915056802154131	9.28709234615411	-5.656316310763191	6.75	Two	Core
Chr8	639302	639502	Unsp	0.18410036866359397	0.57	0.7	5.03065184543009	6.89456030465258	9.49676409057337	9.56783767626756	-6.397484905503839	0.0	Two	Core
Chr8	640788	640913	Unsp	0.070843023255814	0.512	0.335526315789474	5.15087785571597	8.863766443465039	9.94947649493309	9.697055600829552	-6.643856189774719	0.0	Two	Core
Chr8	641827	642062	DNA	0.255648214285714	0.4808510638297871	0.22119815668202802	5.447752677704541	1.32048354845961	9.60271061199872	9.78078907083834	-6.292383819273349	0.6666666666666666	Three	Core
Chr8	663861	664044	Unsp	0.309764021164021	0.53551912568306	-0.511764705882353	5.324619085542901	0.9728229974506821	8.43738695016665	10.210935997288	-6.643856189774719	0.0	Three	Core
Chr8	697958	698090	DNA	0.229515602836879	0.446969696969697	-0.3	5.03065184543009	1.2249417298046898	9.161007157474609	8.128009720473809	-5.20920767206732	1.5	Three	Core
Chr8	724912	725176	LTR	0.0833939483394834	0.303030303030303	1.6851851851851898	5.03065184543009	9.02040705962576	9.45376095984174	6.256634775912691	-5.4739311883324095	14.333333333333334	One	Core
Chr8	725549	726320	Unsp	0.259913636363636	0.269779507133593	1.32055035128806	5.03065184543009	8.70921965073467	9.11663746189568	6.7440129215921605	-4.01503939946414	24.22222222222222	One	Core
Chr8	726373	729000	Unsp	0.273113585762969	0.20479634564141602	1.25275876257809	5.03065184543009	8.74666180182142	8.874762708300919	5.41163849253358	-4.43086246644053	32.629629629629626	One	Core
Chr8	729000	735709	LTR	0.367008194682009	0.21488871834228698	1.2671417349343501	5.03065184543009	8.65182771321686	8.44327768497321	5.460002661932861	-4.19393175664417	20.16176470588235	One	Core
Chr8	729299	729454	LTR	0.25251019108280304	0.25161290322580604	1.13793103448276	5.03065184543009	10.1957915307732	8.60351630761875	6.992006230825139	-5.05406861752959	17.0	One	Core
Chr8	735693	735874	LTR	0.25289555555555604	0.298342541436464	1.2823275862069	5.03065184543009	10.1754180820054	9.60201371280668	6.32883651023637	-4.16484210114909	9.666666666666666	One	Core
Chr8	735874	737281	Unsp	0.241082232267038	0.17270788912579998	1.16894586894587	5.03065184543009	9.00607473048034	8.42503368167099	5.21470633694962	-4.306415095516041	32.06666666666667	One	Core
Chr8	737281	739143	DNA	0.0032113290460878898	0.5477980665950589	-0.6201485148514849	7.49165648597592	7.25783235355408	7.77871699608903	8.99103218361118	-6.22819946377164	32.0	Two	Core
Chr8	739143	739681	Unsp	0.242183714285714	0.195167286245353	1.1594982078853	5.03065184543009	8.3398848161356	8.30288849476841	5.874137576846691	-3.9969659399103703	34.333333333333336	One	Core
Chr8	740283	740778	Unsp	0.240580534653465	0.24040404040403998	1.2951945080091498	5.03065184543009	8.075962053789201	8.56521278512195	6.6644149410105005	-5.87891502294733	30.0	One	Core
Chr8	740785	741239	LTR	0.143097654584222	0.508810572687225	-0.250278706800446	5.03065184543009	7.87649525055899	7.774859607981191	9.48201237352306	-5.9838124501728	28.0	Two	Core
Chr8	741238	747199	LTR	0.0648618514801806	0.5213890286864621	-0.378388655481669	5.85850655038483	6.84993774578341	7.6846820467936094	9.024563653534189	-6.22751885045768	20.433333333333334	Two	Core
Chr8	747199	747652	LTR	0.143405555555556	0.509933774834437	-0.217971014492754	5.03065184543009	7.70575619147401	8.0241148984707	9.61849307524727	-6.20678078176255	28.0	Two	Core
Chr8	747730	748367	Unsp	0.10193552710843401	0.270015698587127	1.29029304029304	5.03065184543009	9.23188774410789	9.01515703733688	7.150193106729139	-6.092841020976911	12.0	One	Core
Chr8	748367	753497	LTR	0.0533015305719921	0.193170538018662	1.26192454079998	5.03065184543009	8.56715449310264	8.610897543783151	5.19064725412046	-5.02777874207763	20.134615384615383	One	Core
Chr8	753501	754140	Unsp	0.105505858433735	0.273865414710485	1.42296918767507	5.03065184543009	9.45328138981325	8.20133305285367	6.729828098527251	-4.6919504779757695	19.714285714285715	One	Core
Chr8	754138	754838	Unsp	0.251294285714286	0.264285714285714	1.54081632653061	5.03065184543009	9.47696327943236	8.83537451348331	6.64102751597375	-6.643856189774719	21.875	One	Core
Chr8	754837	756178	Unsp	0.23475521323529397	0.21774794929157298	1.2517972681524099	5.03065184543009	9.16347588918643	8.773787181324499	5.5878817661163	-4.59088172490968	30.142857142857142	One	Core
Chr8	756192	756895	Unsp	0.257864621848739	0.28733997155049795	1.28409090909091	5.03065184543009	10.013008999705301	8.94364834561279	6.80504698357682	-4.4337968619215795	25.875	One	Core
Chr8	756934	758224	Unsp	0.25371799236641196	0.231782945736434	1.33897994129159	5.03065184543009	9.499273882907131	8.956997347314609	5.818317697402411	-4.9613077234534	32.142857142857146	One	Core
Chr8	758286	758875	Unsp	0.128329830795262	0.20543293718166397	1.25666666666667	5.03065184543009	9.574811629314631	9.206875466669212	4.622121608418309	-4.80139746676121	36.0	One	Core
Chr8	758934	761500	Unsp	0.244653438556934	0.203039750584567	1.27539503386005	5.03065184543009	9.50262294148235	8.57192139964066	5.40315931322072	-5.00471497921384	28.923076923076923	One	Core
Chr8	761704	762092	LTR	0.344686315789474	0.154639175257732	1.2191780821917801	5.03065184543009	9.1049043154558	8.56353133002543	4.98954746670391	-4.63296787363199	34.0	One	Core
Chr8	762102	763287	Unsp	0.23592734375	0.20084388185654	1.24166666666667	5.09975004453444	9.0357505366159	8.83117437958735	4.8323529674000705	-6.0440966871254895	27.166666666666668	One	Core
Chr8	763286	764457	Unsp	0.24189423076923103	0.21093082835183602	1.2810810810810802	5.03065184543009	8.88344558389957	9.12663509207506	5.68784268075768	-5.436650172252951	31.307692307692307	One	Core
Chr8	764459	766316	DNA	0.000538213132400431	0.510500807754443	-0.40021208907741296	5.03065184543009	8.30900866767161	8.40800509662563	8.42009012636596	-6.2818348722988295	32.0	Two	Core
Chr8	766317	767157	Unsp	0.26261406103286394	0.220238095238095	1.3852459016393401	5.03065184543009	8.54918601130764	9.36524582080549	5.82843530949659	-4.64924944854494	25.77777777777778	One	Core
[truncated: 221 more rows]
