# Supplementary material for: A unique chromatin profile defines adaptive genomic regions in a fungal plant pathogen
Source: eLife journal article supplement (doi:10.7554/elife.62208), 2020-12-18
Supplement: supp [file elife-62208-supp-v1.zip › elife_poa_e62208_Figure_7_source_data_2.txt]

Chrom start end Name lg2TPM.K9 lg2TPM.K27 lg2TPM.atac GC_frac lg2_PDB lg2whgt_mCG umap_g lg2FC_plant LS_core
Chr1 95919 100448 VDAG_JR2_Chr1g00010.1 8.84985961507389 5.813056737720059 5.91362036039973 0.509826 4.074267725063788 -0.989456505758531 Two 1.6558259531043402 Core
Chr1 100674 106913 VDAG_JR2_Chr1g00020.1 8.41117685720832 6.2516556509274 6.0758802891726695 0.520757 2.8555285010622664 -0.990451665430748 One 2.6159843010283903 Core
Chr1 106967 108991 VDAG_JR2_Chr1g00030.1 8.37410904884175 5.87091976423087 6.02623479801717 0.542984 8.186746521044029 -0.9935051787078678 Two 2.50948957147581 Core
Chr1 109150 110146 VDAG_JR2_Chr1g00040.1 7.93103956486773 6.46078011891866 6.125160133048098 0.4889560000000001 7.034239110839715 -0.9907221864119892 Two -1.07758553705912 Core
Chr1 109890 114598 VDAG_JR2_Chr1g00050.1 7.69175237588444 5.89513135383908 6.13569604342892 0.546092 4.125034244220505 -0.9882406775473432 Two -3.17047829995658 Core
Chr1 115849 116907 VDAG_JR2_Chr1g00060.1 6.969330758409081 5.9788046468848 6.15978225562006 0.534972 2.8167081276769426 -0.9922226494082808 Two -0.856138962322101 Core
Chr1 116793 118314 VDAG_JR2_Chr1g00070.1 8.60420047503531 5.4730150420570185 6.223724591891428 0.539776 5.306935615880647 -0.9945216713690932 Two -0.20825357060995806 Core
Chr1 118782 119550 VDAG_JR2_Chr1g00080.1 0.556265668297366 4.46040611093352 6.63734220209952 0.520833 5.4470932432132235 -0.987740302205881 Three -1.22836044881624 Core
Chr1 119525 122333 VDAG_JR2_Chr1g00090.1 6.35413834600671 6.1413125914295685 6.24821744148762 0.5349 4.5450901274791535 -0.993489414639634 Two 2.34217084548332 Core
Chr1 122724 124875 VDAG_JR2_Chr1g00100.1 7.005536688687121 5.94884185036114 6.214642718245653 0.551836 5.3980676940223065 -0.990771642046462 Two 0.945401012638927 Core
Chr1 125213 127877 VDAG_JR2_Chr1g00110.1 6.30104284523165 5.90270105088843 6.16340118841297 0.533784 5.427053647481909 -0.990682238605956 Two -1.76145503536603 Core
Chr1 127929 128638 VDAG_JR2_Chr1g00120.1 7.80541201412225 6.40228735954465 6.476160188297699 0.54725 11.320518502916615 -0.990855834872986 Two -0.580190151737106 Core
Chr1 128815 131545 VDAG_JR2_Chr1g00130.1 7.454797073186119 6.3336446782936 6.082944360175119 0.5362640000000001 7.527855191334576 -0.992492666804798 Two 5.46542292818255 Core
Chr1 130885 134116 VDAG_JR2_Chr1g00140.1 7.28842480353928 6.087386040091679 6.44199190971549 0.547199 3.8725279262837593 -0.9899641914671852 Two 2.8775013932097697 Core
Chr1 134332 136170 VDAG_JR2_Chr1g00150.1 5.467518616016611 6.28944500133932 6.54992325335363 0.551687 1.9674756549871868 -0.994429144480718 Two -0.287849986099266 Core
Chr1 136331 137939 VDAG_JR2_Chr1g00160.1 7.34479932711918 5.980417281705941 6.150158906673419 0.541667 1.4207658900774758 -0.9880378871596 Two -1.34817267641422 Core
Chr1 139431 144139 VDAG_JR2_Chr1g00170.1 6.06278110567549 5.567516630988162 6.47833832588516 0.5497029999999999 5.262336169168108 -0.9903743839003232 Two 1.61551420220915 Core
Chr1 145871 146516 VDAG_JR2_Chr1g00180.1 7.38690996315257 6.6319671632232415 6.3432780030188 0.474419 0.8198681169737158 -0.9884053735439708 One -3.7333552443004314 Core
Chr1 149245 149954 VDAG_JR2_Chr1g00190.1 1.33846601166411 6.393368129953831 6.965764151798379 0.571227 1.1768556490550106 -0.9951684648718172 Three -2.81886145388362 Core
Chr1 150094 153864 VDAG_JR2_Chr1g00200.1 7.4507757643241 5.63210508961012 6.182672279045451 0.5262600000000001 3.191753735435661 -0.988315238249568 Two -0.87252055656058 Core
Chr1 161015 164654 VDAG_JR2_Chr1g00210.1 6.41608729809988 5.1275291493370405 6.352472449609443 0.545754 5.785655056582643 -0.99156461373446 Two 1.49945787765313 Core
Chr1 164876 168188 VDAG_JR2_Chr1g00220.1 6.64307981822945 4.8585042869964505 5.999651257340091 0.548007 5.133712857463434 -0.991203588132742 Two 4.133047440103669 Core
Chr1 169615 174014 VDAG_JR2_Chr1g00230.1 6.55423284721035 5.914523315813099 6.3443621600275 0.534667 4.244498818580063 -0.9916323292137008 Two 1.8103340945421895 Core
Chr1 172327 174499 VDAG_JR2_Chr1g00240.1 7.33117250291687 6.0824171134568 6.27450718074728 0.5432779999999999 2.5873790128863834 -0.9907221864119892 Two -0.7918968070653729 Core
Chr1 174498 175888 VDAG_JR2_Chr1g00250.1 7.06142675845514 5.8129899446812585 6.50964130608998 0.5690649999999999 4.289739315597154 -0.9905319099657572 Two -1.99704195420328 Core
Chr1 178982 180954 VDAG_JR2_Chr1g00260.1 6.87911486949605 5.7358465165110495 6.141795429085599 0.530933 4.241302896146508 -0.9877724023548752 Two -1.38663609634762 Core
Chr1 181183 182394 VDAG_JR2_Chr1g00270.1 7.23626137411413 5.45051505324988 6.652062897023081 0.543353 9.088314909052077 -0.9943644653305672 Two 0.833465778619849 Core
Chr1 182745 183961 VDAG_JR2_Chr1g00280.1 5.9028459256672585 6.55005706882359 6.4022097035754095 0.536184 6.256299866765963 -0.991040596871126 Two 0.9041038108237992 Core
Chr1 184466 187662 VDAG_JR2_Chr1g00290.1 6.599623032485019 6.061833106222191 6.0622536713888895 0.5259699999999999 4.687165460919479 -0.9901912707200472 Two 0.790605942467732 Core
Chr1 187795 190330 VDAG_JR2_Chr1g00300.1 7.20755316730282 6.08064814342555 6.163187409036289 0.5309659999999999 2.7945052826747103 -0.9927938493958292 Two 1.1731751330975602 Core
Chr1 190700 195776 VDAG_JR2_Chr1g00310.1 7.037067532500871 6.18383843237731 6.27886272543927 0.537234 2.4473504973012594 -0.990524338508256 Two 1.78348711087231 Core
Chr1 195810 197685 VDAG_JR2_Chr1g00320.1 6.85129408910051 6.16260511112028 6.42957017708841 0.559467 2.7526633794523163 -0.99198659690499 Two 0.745705719188904 Core
Chr1 203378 206944 VDAG_JR2_Chr1g00330.1 6.82741235457317 5.87265998683648 6.51113899025803 0.547392 3.2207499127699517 -0.9927710821344592 Two 2.21709321120567 Core
Chr1 207790 210034 VDAG_JR2_Chr1g00340.1 6.7320263751382505 5.32914247122309 6.504533119752611 0.55303 3.679074188598016 -0.992535622688697 Two 2.01849281866342 Core
Chr1 211415 215428 VDAG_JR2_Chr1g00350.1 6.23762538251996 5.56833808338331 6.29436496540363 0.5417390000000001 1.6387701578026448 -0.992005699360759 Two 0.393519081398221 Core
Chr1 216158 218299 VDAG_JR2_Chr1g00360.1 5.449425507478889 5.929810478778943 6.29166759802899 0.5506770000000001 2.8812287190307115 -0.9884583781173092 Two 1.11351794789249 Core
Chr1 218483 220570 VDAG_JR2_Chr1g00370.1 6.6812293876877415 5.72492075631871 6.32805723424956 0.560134 4.883532575243545 -0.9865625569818408 Two 0.722607639926395 Core
Chr1 221027 222004 VDAG_JR2_Chr1g00380.1 7.93056098930511 6.14947500183514 6.5593525492984295 0.582395 3.957732613560131 -0.991075600460436 Two 1.09617992909124 Core
Chr1 222265 224662 VDAG_JR2_Chr1g00390.1 6.1112864277361725 5.877048629062233 6.0930560667734515 0.529412 6.112911738696043 -0.99117941923981 Two 1.54383021934572 Core
Chr1 225260 226924 VDAG_JR2_Chr1g00400.1 7.315521430675651 6.52926948427527 6.10356326670663 0.5150239999999999 7.3031526810670675 -0.9913782908292093 Two -0.629369896218396 Core
Chr1 226934 229850 VDAG_JR2_Chr1g00410.1 4.8395154643981 5.830281853474059 6.2713079799376 0.542867 5.984019061059327 -0.991660111188267 Two 1.6479541477519302 Core
Chr1 232412 236100 VDAG_JR2_Chr1g00420.1 6.20154485716313 6.1130176560531 6.4978963231807985 0.5550430000000001 8.451339835984964 -0.9917305957373208 Two 1.66449633916501 Core
Chr1 236196 238480 VDAG_JR2_Chr1g00430.1 4.61886658170898 5.18742550340658 6.3850586171830095 0.5704899999999999 2.9900228599724827 -0.991847126746376 Two 2.47469485212382 Core
Chr1 237337 238501 VDAG_JR2_Chr1g00440.1 4.36145511256289 5.30862374482544 6.50568672586706 0.573883 0.0 -0.992093598498966 Two -0.5803418213911651 Core
Chr1 238552 242703 VDAG_JR2_Chr1g00450.1 6.98316153635588 5.1576869726056 6.64684989523416 0.599374 4.978981113166618 -0.992595922524088 Two 0.8745026930913891 Core
Chr1 243144 249734 VDAG_JR2_Chr1g00460.1 5.8828207736692 5.5731091293919 6.44604944809787 0.575114 5.4637669953572585 -0.989890427326375 Two 3.62415928267335 Core
Chr1 251341 253202 VDAG_JR2_Chr1g00470.1 8.11618059401996 5.616550227208982 6.51219678992561 0.56475 6.606859237886439 -0.9912030517628408 Two 1.39006337068413 Core
Chr1 253329 254020 VDAG_JR2_Chr1g00480.1 4.99322455328734 6.172719400899871 6.33051961078762 0.570188 6.2001063637472535 -0.992990231987156 Two 0.094418706327641 Core
Chr1 254112 256460 VDAG_JR2_Chr1g00490.1 5.516622715834581 5.931368668027768 6.16596699965535 0.531942 8.277078060357804 -0.990636288329756 Two 0.335040446131428 Core
Chr1 256638 262114 VDAG_JR2_Chr1g00500.1 3.46324422055036 5.77712647445889 6.29640295730921 0.573959 5.5187320321532525 -0.989108687005266 Two 2.45763734481262 Core
Chr1 260131 262085 VDAG_JR2_Chr1g00510.1 0.453983823052398 5.4449129931668185 6.412394389934912 0.603378 0.0 -0.9908176519923148 Three -1.57225394985727 Core
Chr1 262565 263954 VDAG_JR2_Chr1g00520.1 6.08983526371254 5.19948908142764 6.6407819742572 0.593952 6.150451229306077 -0.9945129706820122 Two 2.96144420322183 Core
Chr1 265288 270976 VDAG_JR2_Chr1g00530.1 6.4229319718244815 5.7233455910552005 6.36654882825241 0.582278 3.4112905767232733 -0.990990315267593 Two 2.09965619346188 Core
Chr1 272316 276028 VDAG_JR2_Chr1g00540.1 7.28951951203843 6.01772982786901 6.05306637566096 0.5393319999999999 3.328665307173312 -0.991023692909275 Two 1.4197041165009 Core
Chr1 276183 278789 VDAG_JR2_Chr1g00550.1 5.81557045626557 5.64595079234604 6.247048890049863 0.554106 7.757124808645559 -0.990424290468096 Two 2.0509353155592 Core
Chr1 278871 279803 VDAG_JR2_Chr1g00560.1 7.4707930524111115 5.9892789271770726 6.138457813080031 0.5493560000000001 6.920308294943652 -0.9905577298668248 Two -2.00578757760774 Core
Chr1 280436 282197 VDAG_JR2_Chr1g00570.1 7.803542609178881 5.63497036437242 6.599897137866219 0.57297 3.8918439632062944 -0.992476576093898 Two 0.96784851125721 Core
Chr1 282264 283989 VDAG_JR2_Chr1g00580.1 5.697602541191549 5.108380822337129 6.641901334991242 0.628406 3.785379664646919 -0.995070337829442 Two -5.2021598215147185 Core
Chr1 285015 287077 VDAG_JR2_Chr1g00590.1 6.898162101010032 5.4561328871310915 6.33093676262964 0.562561 6.654797521858892 -0.988255569674755 Two 4.97298503800971 Core
Chr1 290434 292427 VDAG_JR2_Chr1g00600.1 6.66955797660776 5.31546454572028 6.3654826113877 0.538384 6.02320662543691 -0.993779466310224 Two 0.6488294769331889 Core
Chr1 293075 295565 VDAG_JR2_Chr1g00610.1 4.0964871523232 5.68144114865301 6.31910757559547 0.586747 5.241483618856867 -0.990202759765368 Two 0.7886337420792529 Core
Chr1 295360 296866 VDAG_JR2_Chr1g00620.1 4.43514050174783 5.2594263973459805 6.32334704351699 0.6029220000000001 6.4163267255533984 -0.99071665860122 Two 4.5144189779317685 Core
Chr1 297432 300087 VDAG_JR2_Chr1g00630.1 6.88307198930913 5.419865005806919 6.55316096520833 0.587571 3.255631673986436 -0.986644561507704 Two 1.80480713123776 Core
Chr1 300338 302806 VDAG_JR2_Chr1g00640.1 4.21473373399201 5.260774108211749 6.54711323779709 0.5919770000000001 4.3770975928300775 -0.99195315467563 Two 1.95009413696204 Core
Chr1 304518 307298 VDAG_JR2_Chr1g00650.1 6.3729523693608785 5.441477550842251 6.59225216891116 0.5931649999999999 5.473043242887648 -0.989069687058167 Two 4.24314562140558 Core
Chr1 307478 309481 VDAG_JR2_Chr1g00660.1 5.28099042084199 5.262929456928831 6.72415480122691 0.6240640000000001 0.997022037642754 -0.987283663360912 Two -1.7035484898032 Core
Chr1 312037 313694 VDAG_JR2_Chr1g00670.1 6.9816218360184 5.0753179773696 6.76123413401707 0.592637 6.396487367812548 -0.9942414068424 Two -0.769434748001616 Core
Chr1 314591 317939 VDAG_JR2_Chr1g00680.1 6.26023290079847 5.67995472265308 6.46110051441918 0.5985659999999999 3.54507130596119 -0.99164195710865 Two -1.53956436610998 Core
Chr1 319917 321670 VDAG_JR2_Chr1g00690.1 6.93058241430218 7.5824874957678094 6.51715561043617 0.574444 0.7219916392863078 -0.98516052297331 One -2.45816327523734 Core
Chr1 322744 323932 VDAG_JR2_Chr1g00700.1 5.83957889023183 4.89869286743128 6.85498362086854 0.612795 8.944403053487319 -0.992812340526095 Two 6.52488214414966 Core
Chr1 325765 327208 VDAG_JR2_Chr1g00710.1 5.4200450760370185 5.90270105088843 6.79512216668023 0.612613 2.7172844584455857 -0.9886375815844192 Two 0.30395163947570697 Core
Chr1 329498 330091 VDAG_JR2_Chr1g00720.1 7.75542883518223 7.27178613964826 6.51238769719074 0.527825 0.224941374596502 -0.9937137371525692 One -5.9474581178449 Core
Chr1 330901 333833 VDAG_JR2_Chr1g00730.1 5.00243632359137 6.51121843724917 6.4732922987921215 0.539904 3.557162701100688 -0.9946209847612092 Two 2.32925619693985 Core
Chr1 334136 336551 VDAG_JR2_Chr1g00740.1 5.11530761220337 5.84098572323058 6.3698656803473614 0.561491 5.05137154376567 -0.98972501616661 Two 3.6310213584113 Core
Chr1 336547 337686 VDAG_JR2_Chr1g00750.1 6.36676180580729 5.5234762529703705 6.8574426784901785 0.645303 4.219439473795715 -0.9937979284339292 Two 1.67127688754044 Core
Chr1 338107 340840 VDAG_JR2_Chr1g00760.1 6.036667039989071 6.02364673581174 6.43561615217399 0.5667760000000001 4.330945096071944 -0.9901537770723672 Two 2.12842332338018 Core
Chr1 340632 341814 VDAG_JR2_Chr1g00770.1 5.20023625807216 5.72254973922862 6.114221528004251 0.560914 3.798046999033625 -0.9908535511001652 Two 1.3304611527314498 Core
Chr1 342729 344187 VDAG_JR2_Chr1g00780.1 4.51144095465009 6.35222757916746 6.43774214914409 0.5624140000000001 3.0682129280201265 -0.991233465705368 Two -2.10185320817062 Core
Chr1 345122 346675 VDAG_JR2_Chr1g00790.1 6.930502362270008 6.036834849680481 6.30179709922306 0.566001 1.0148235554453784 -0.989946335336077 Two -1.99186750210984 Core
Chr1 346598 348791 VDAG_JR2_Chr1g00800.1 6.12996562789078 5.63702503239084 6.495780372182258 0.592795 3.1751725199222403 -0.992957541604083 Two 1.55184579585307 Core
Chr1 348957 350322 VDAG_JR2_Chr1g00810.1 7.9117859652419185 6.61111585689829 6.22358476281031 0.547253 1.7237462434671482 -0.991511363092768 One -0.990180949638344 Core
Chr1 350760 352672 VDAG_JR2_Chr1g00820.1 7.039782094526402 5.12487986730412 6.832062405043019 0.610356 4.1746218749634965 -0.990863731441443 Two 0.47254615785337 Core
Chr1 353619 354407 VDAG_JR2_Chr1g00830.1 8.1469341686344 6.16012597879751 6.39310865863662 0.513959 1.3309052141240865 -0.98623294874707 One -2.4669317785094504 Core
Chr1 354611 356556 VDAG_JR2_Chr1g00840.1 5.93078252490096 5.16598654101174 6.47883825400059 0.6113109999999999 5.525704309510847 -0.989562594818342 Two 3.91697512117426 Core
Chr1 357140 359574 VDAG_JR2_Chr1g00850.1 6.332095462974008 4.9596349859437305 6.6978533575159585 0.597781 6.836762233812507 -0.98629315177807 Two 5.4207998715748 Core
Chr1 359962 361733 VDAG_JR2_Chr1g00860.1 6.115725396887691 5.79002036190793 6.59923656119053 0.577075 4.093628319262698 -0.990578284614742 Two 2.1377912177323 Core
Chr1 361836 363736 VDAG_JR2_Chr1g00870.1 6.4948470907835985 6.41110992481239 6.84033620276016 0.534737 3.972681698307913 -0.990321926189076 Two -1.89202265525995 Core
Chr1 364336 370309 VDAG_JR2_Chr1g00880.1 7.46635699950224 7.879341887474119 6.22685157695058 0.522016 0.7039880023339963 -0.9934217585774928 One -0.7347844775513319 Core
Chr1 371812 372531 VDAG_JR2_Chr1g00890.1 8.69548543173615 6.265074300631532 6.44734370262185 0.561891 2.306161983292796 -0.993264716801038 Two -2.16763301650352 Core
Chr1 372541 373442 VDAG_JR2_Chr1g00900.1 7.058900480976338 7.19869346018651 6.56004542688394 0.54162 4.45539858862802 -0.9914615136211252 One -2.44445753115719 Core
Chr1 374613 376285 VDAG_JR2_Chr1g00910.1 7.575402510756152 8.591925441240361 6.17184378856796 0.525718 0.0 -0.990352411280168 One -19.123308 
Chr1 379359 381261 VDAG_JR2_Chr1g00920.1 6.774385553928338 6.62847447581683 6.89116178849645 0.612513 0.6575683711297682 -0.9914262972028292 Two -2.47495065336294 Core
Chr1 382492 383414 VDAG_JR2_Chr1g00930.1 3.00967140791897 7.05984987842775 6.69462008720273 0.612798 0.2146872220560023 -0.9918363470517472 Three -5.97798727606938 Core
Chr1 383634 385111 VDAG_JR2_Chr1g00940.1 6.33097560256076 6.19283776562183 6.77809912627153 0.6147600000000001 2.4652895874625207 -0.992771881371091 Two 0.007634674743273329 Core
Chr1 385374 386557 VDAG_JR2_Chr1g00950.1 0.3845140055546679 4.83784252272724 6.8300578277141 0.663567 6.490269070095527 -0.992729610831571 Three 2.98622622873711 Core
Chr1 386636 387708 VDAG_JR2_Chr1g00960.1 4.82276139114855 5.36139968701855 6.84060993348446 0.639925 5.285282714129408 -0.989637938102392 Two 0.799219843771547 Core
Chr1 387814 390164 VDAG_JR2_Chr1g00970.1 6.322421234495032 5.29924481327605 6.72072870274383 0.612766 4.888159401993704 -0.9901954708547058 Two 3.39704870752534 Core
Chr1 391300 392971 VDAG_JR2_Chr1g00980.1 5.62111863233585 5.828151130812548 6.893794668454 0.597846 7.0653730526958025 -0.98562344243442 Two 2.25002843776794 Core
Chr1 393481 394716 VDAG_JR2_Chr1g00990.1 5.00051289691454 6.1361114775592505 6.54767772479269 0.529555 0.3583409848197613 -0.992768430768924 Two -3.40880801604952 Core
Chr1 394190 395073 VDAG_JR2_Chr1g01000.1 6.03675587597096 6.2960274489237 6.66266577909906 0.5345409999999999 0.22502618733683466 -0.990625295129922 Two -4.64907037755394 Core
Chr1 395271 396111 VDAG_JR2_Chr1g01010.1 7.11969573947878 5.96133367713872 7.170153500051 0.569048 1.6758417174454632 -0.9951829837022242 Two -2.77795221446505 Core
Chr1 397174 398540 VDAG_JR2_Chr1g01020.1 7.03782407540055 7.52071989018704 6.24112011338521 0.568082 4.058521190966923 -0.9919242515703242 One 1.76001132932603 Core
Chr1 400559 402175 VDAG_JR2_Chr1g01030.1 6.03597109714799 5.14501014139814 6.58188872554674 0.637995 4.080895420525018 -0.9867363966584592 Two -1.4280074647778502 Core
Chr1 402185 404689 VDAG_JR2_Chr1g01040.1 7.01754143038854 5.72272942355294 6.53878727134138 0.575879 3.9693325380143447 -0.993786298255257 Two 1.55892416515205 Core
Chr1 407700 411490 VDAG_JR2_Chr1g01050.1 6.867083239981151 6.15937178204134 6.63785881717623 0.5630609999999999 5.594508604569642 -0.990874763752398 Two 4.808727724875419 Core
Chr1 411664 413590 VDAG_JR2_Chr1g01060.1 7.152391716466041 6.73620647010464 6.39474503248244 0.568017 1.6305040919376281 -0.992530833363755 One -0.612949609388813 Core
Chr1 414056 416022 VDAG_JR2_Chr1g01070.1 6.74943368826317 8.25500414514137 6.11497467467651 0.52645 0.2954674300923039 -0.988338429246306 One -3.81202573674262 Core
Chr1 417164 418961 VDAG_JR2_Chr1g01080.1 6.53426607017501 7.395354651064402 6.239934503746799 0.562048 0.3207056312228853 -0.9933074648777328 One -3.81886180462343 Core
Chr1 421093 422933 VDAG_JR2_Chr1g01090.1 6.5222605768045305 6.863375930450911 6.52885852944843 0.598913 0.9222312136702376 -0.994505507348805 One -2.3459520392921003 Core
Chr1 423071 425233 VDAG_JR2_Chr1g01100.1 7.11936135578402 6.06092791753143 6.27349640421028 0.562905 5.7060929936259575 -0.986728928072229 Two 2.2241313332587405 Core
Chr1 425891 429673 VDAG_JR2_Chr1g01110.1 5.69555963800764 6.008090613336071 6.299694270085468 0.571391 5.150926272914433 -0.9892582768605792 Two 2.4730729248444905 Core
Chr1 429834 431626 VDAG_JR2_Chr1g01120.1 6.664044710885482 5.3604270600843895 6.69925250872299 0.573661 6.026445427316031 -0.98655566225439 Two 3.1864750734919 Core
Chr1 432173 435468 VDAG_JR2_Chr1g01130.1 5.29130116250054 5.25845542006307 6.65133554344226 0.591806 3.2201256075599662 -0.99168708048143 Two 2.07286258057861 Core
Chr1 435497 439263 VDAG_JR2_Chr1g01140.1 7.5426676658138 5.87145598255021 6.39870304379712 0.549124 4.073245124714508 -0.99102744700066 Two 0.778799335068973 Core
Chr1 443529 444628 VDAG_JR2_Chr1g01150.1 6.3553684356646 6.02509865271489 6.84647348070286 0.576888 6.190902902201376 -0.991678336622217 Two -0.0384640133042805 Core
Chr1 445196 449969 VDAG_JR2_Chr1g01160.1 6.30185055917975 5.12480060449468 6.370579009396759 0.594595 1.8625294967189816 -0.990328160260655 Two -0.88802592772051 Core
Chr1 450056 452982 VDAG_JR2_Chr1g01170.1 6.47843793951967 5.15595547668106 6.82155638267428 0.6120979999999999 5.709208669325303 -0.993726915942248 Two -2.26759386553776 Core
Chr1 453362 457668 VDAG_JR2_Chr1g01180.1 6.387745022484982 5.54512707269132 6.34379278756838 0.5715279999999999 6.71892161552418 -0.991091731239213 Two 1.28337581444895 Core
Chr1 458059 461345 VDAG_JR2_Chr1g01190.1 8.087668827406139 5.520940400730621 6.34987411071184 0.557212 3.402734810239508 -0.9899712949828822 Two 0.760752036183333 Core
Chr1 470614 472257 VDAG_JR2_Chr1g01200.1 8.75128855223554 5.781091315779519 6.41197061077848 0.581862 1.7526193865036956 -0.990063189018732 Two -0.6818180327583261 Core
Chr1 483748 484675 VDAG_JR2_Chr1g01210.1 7.41072990571134 6.789800758885112 6.14125845976776 0.6170439999999999 0.21582512990420444 -0.989547746297047 One -5.9787756769849 Core
Chr1 485268 486669 VDAG_JR2_Chr1g01220.1 7.89953695610767 7.75083251207562 5.9574364373315 0.5210560000000001 1.117835454908649 -0.9900245407862048 One -2.53289602976796 Core
Chr1 488247 491291 VDAG_JR2_Chr1g01230.1 7.5785736070959695 5.62307702846815 6.28236408514348 0.5919840000000001 5.4115825854327415 -0.9930472393582328 Two 2.42368180179188 Core
Chr1 491291 492149 VDAG_JR2_Chr1g01240.1 8.13893695403777 6.20556800532414 6.241568243022653 0.527972 6.931831543337148 -0.9918721191166 Two 0.8576347693145799 Core
Chr1 492591 494900 VDAG_JR2_Chr1g01250.1 6.77606407869167 5.97608056707499 6.634592629412628 0.601126 6.58074029719519 -0.9930072987408368 Two -0.439586413574326 Core
Chr1 494549 495630 VDAG_JR2_Chr1g01260.1 8.40762296376841 6.16312528166006 6.66079913466541 0.575393 11.014202685239164 -0.9911595125061228 Two 0.288849507459384 Core
Chr1 495693 496695 VDAG_JR2_Chr1g01270.1 7.58851696479729 5.373385083348548 6.6094765109275695 0.580838 11.514150127721665 -0.9894429701166072 Two 1.39778476497004 Core
Chr1 496833 498857 VDAG_JR2_Chr1g01280.1 6.9665579508708095 5.748853549454969 6.350721774732079 0.579051 0.503732131154202 -0.993205078617996 Two -2.90024076630336 Core
Chr1 499460 504332 VDAG_JR2_Chr1g01290.1 7.31321717316367 5.22746604190968 6.065495487346031 0.5704020000000001 2.6684405926205788 -0.9910668752299922 Two 2.02629846644503 Core
Chr1 504397 506100 VDAG_JR2_Chr1g01300.1 7.25451657134976 5.57476190146683 6.271850691511822 0.584263 3.1310275983790588 -0.992232312760765 Two -0.803752665574165 Core
Chr1 506748 507533 VDAG_JR2_Chr1g01310.1 6.88714512530169 6.178114560926349 6.8074957241538 0.5974520000000001 5.376464983051113 -0.992722834301074 Two -0.852830944364533 Core
Chr1 507518 509531 VDAG_JR2_Chr1g01320.1 6.25861247739546 5.663823966366709 6.660402769337961 0.597119 2.712905972307525 -0.990757683228286 Two 0.8443979917351719 Core
Chr1 510123 511901 VDAG_JR2_Chr1g01330.1 7.53382598325515 6.12816566882166 6.561785124517209 0.603487 1.266980121785344 -0.994660169019275 Two -1.37113612168838 Core
Chr1 513659 517110 VDAG_JR2_Chr1g01340.1 7.63726301311639 6.65049129031471 6.2055903887230714 0.55752 0.94464917977409 -0.987686975252822 One -0.921386379104982 Core
Chr1 516904 519395 VDAG_JR2_Chr1g01350.1 6.58722640036576 5.8536978167073785 6.73953445624242 0.590124 4.147804023158056 -0.9919674271404392 Two 0.8663041860329559 Core
Chr1 519538 523891 VDAG_JR2_Chr1g01360.1 6.95721085449118 6.056959668770992 6.59287228412756 0.550195 2.2439796599299617 -0.991427899549456 Two 1.24003861685874 Core
Chr1 523936 524576 VDAG_JR2_Chr1g01370.1 4.92393759499458 7.01138625107905 6.1579491027723385 0.504687 2.4007143536087496 -0.992789514149046 One -1.21098414700448 Core
Chr1 524813 528138 VDAG_JR2_Chr1g01380.1 5.67510063332908 5.07544332219108 6.423828315556201 0.602105 6.024077923498497 -0.992259595587203 Two 2.63697906012434 Core
Chr1 528252 529934 VDAG_JR2_Chr1g01390.1 5.90864428053069 6.00313031475742 6.263927132752732 0.600476 3.5944396409838264 -0.991227290534643 Two 0.549200571019601 Core
Chr1 529747 530826 VDAG_JR2_Chr1g01400.1 6.601462605282428 6.12857225570521 6.1255118156635096 0.518072 1.1970999658420138 -0.992303897956992 Two -3.04195873252904 Core
Chr1 530805 531626 VDAG_JR2_Chr1g01410.1 6.3571313611449884 5.80149403503988 6.938309380848921 0.556638 1.065662785943832 -0.985786140780299 Two -2.51895870881756 Core
Chr1 532630 533747 VDAG_JR2_Chr1g01420.1 9.15639683828208 7.060334874998231 6.5667606737615 0.535363 0.8528721923154453 -0.996163042842344 One -2.99774568912438 Core
Chr1 536036 538406 VDAG_JR2_Chr1g01430.1 8.17255216736301 6.304286763169558 6.53833408520454 0.60211 0.8638359743623429 -0.991249421982302 One -1.78464640747329 Core
Chr1 539697 542045 VDAG_JR2_Chr1g01440.1 7.79823308187989 6.471371694580751 6.4340499602932 0.592845 0.2518995676679499 -0.993858590403746 One -3.82533437012235 Core
Chr1 683015 684301 VDAG_JR2_Chr1g01450.1 8.5741620424085 5.5832509020220185 6.45725308835267 0.569984 5.044758134866801 -0.992914592659824 Two 0.8360984072617641 Core
Chr1 684316 687190 VDAG_JR2_Chr1g01460.1 7.040239095313 5.182809523769572 6.2332696070309295 0.567154 4.564952065957373 -0.9921164009241672 Two 3.3421827007785 Core
Chr1 687407 690063 VDAG_JR2_Chr1g01470.1 6.7095593105591 5.4563857020716 6.12501723749399 0.5847140000000001 3.306991596346036 -0.992068726363781 Two 0.90926829276997 Core
Chr1 690672 693421 VDAG_JR2_Chr1g01480.1 7.3457485927745 5.58130530941133 6.5155668956857005 0.580575 7.105120272602552 -0.992965477043788 Two 4.92343648350814 Core
Chr1 693945 695748 VDAG_JR2_Chr1g01490.1 6.06889180316308 5.71672386437711 7.01850690245413 0.575707 0.935004079849549 -0.992090090807574 Two -1.94281299092839 Core
Chr1 695933 698501 VDAG_JR2_Chr1g01500.1 6.92072056768904 5.19179988301181 6.8869736217468205 0.570483 0.9668196797521345 -0.9915940441065848 Two -1.31551213342155 Core
Chr1 698625 700550 VDAG_JR2_Chr1g01510.1 6.8351630351643085 5.659258545629848 6.165220936135071 0.58026 1.845637361030478 -0.992205530594424 Two -0.357357959000433 Core
Chr1 701776 703909 VDAG_JR2_Chr1g01520.1 7.590594855433309 7.48161301112605 5.86683446425588 0.515237 5.185056478793585 -0.994213137481018 One 3.55734058761071 Core
Chr1 707107 710218 VDAG_JR2_Chr1g01530.1 7.97249593726395 5.58994073612118 6.4647939040844 0.564449 5.651834563971377 -0.9887178698476192 Two 1.37726696057877 Core
Chr1 709732 710940 VDAG_JR2_Chr1g01540.1 8.11876381181654 5.338759687387348 6.454258663500251 0.538907 2.238776691129146 -0.991289361970653 Two -2.6886596153430404 Core
Chr1 711204 714701 VDAG_JR2_Chr1g01550.1 7.0331718678938 5.433171209161639 6.498124843504139 0.594224 3.9194466103938734 -0.992319411072869 Two 1.09433025958621 Core
Chr1 715098 717733 VDAG_JR2_Chr1g01560.1 7.03783619867935 5.29620179231826 6.44818031242411 0.610247 3.7714759988098896 -0.991195560701683 Two 0.13365190677225902 Core
Chr1 717378 718953 VDAG_JR2_Chr1g01570.1 6.2741058427624905 5.49562882185012 6.57901924499371 0.601905 3.969943362623728 -0.9906002084823928 Two -1.88332785009492 Core
Chr1 719341 723984 VDAG_JR2_Chr1g01580.1 6.82489607522784 5.26456563056529 5.98867157280182 0.574628 3.0739055968164184 -0.9905828230455258 Two -0.00297486198921066 Core
Chr1 724196 725161 VDAG_JR2_Chr1g01590.1 6.45104928562213 3.89879282366762 6.40302221440213 0.623834 0.0 -0.987311963902361 Two -8.808564504355939 Core
Chr1 726057 727325 VDAG_JR2_Chr1g01600.1 8.39883556480601 5.623211569439862 5.9119653991287695 0.52918 0.4765039658868051 -0.993918502031332 Two -3.9689915084344713 Core
Chr1 727657 730741 VDAG_JR2_Chr1g01610.1 7.21318544373963 5.809650989495982 6.4054782110604105 0.571012 7.446125194987367 -0.9777549212014808 Two 1.6376956326680498 Core
Chr1 729953 730618 VDAG_JR2_Chr1g01620.1 8.617423652750139 6.741088709588452 6.51498139846984 0.509774 0.0 -0.981780279099736 One -5.97877567698491 Core
Chr1 755397 757245 VDAG_JR2_Chr1g01630.1 7.825403310175528 5.83796225992575 6.629029708025169 0.580087 9.267271627912383 -0.9936230660913492 Two 2.7175267773455203 Core
Chr1 757635 761735 VDAG_JR2_Chr1g01640.1 5.45670082131842 4.83567660293026 6.405458934017769 0.600488 4.359538267059768 -0.99226632586898 Two 2.7390171742349203 Core
Chr1 761405 765295 VDAG_JR2_Chr1g01650.1 5.54815705399551 5.74688161051585 6.27787828857208 0.596915 2.2678019328734846 -0.9905895817157452 Two 1.26622242508757 Core
Chr1 765370 766834 VDAG_JR2_Chr1g01660.1 6.85500454227981 4.7232608523865 6.35372879892645 0.64276 1.2788556466214314 -0.9937480851873728 Two -3.62902659794405 Core
Chr1 767276 771835 VDAG_JR2_Chr1g01670.1 7.1480348117934405 5.5029068691399585 6.2983469034893895 0.599035 0.22007534176346685 -0.991223756588356 Two -3.09051429692365 Core
Chr1 771928 774677 VDAG_JR2_Chr1g01680.1 6.679015230051791 4.822398288034691 6.43232212629491 0.591852 3.0755292072905185 -0.989392665098846 Two 1.67235142981841 Core
Chr1 775905 776737 VDAG_JR2_Chr1g01690.1 6.148065915173969 5.78263926453678 6.94119507713539 0.576923 0.37782692845801386 -0.992053436031663 Two -4.674618112095611 Core
Chr1 776745 778611 VDAG_JR2_Chr1g01700.1 7.1215453757444696 5.405901847605469 6.6160560482358886 0.6071810000000001 2.2190693215032167 -0.99330472605263 Two 0.16990056740146894 Core
Chr1 780009 781541 VDAG_JR2_Chr1g01710.1 7.400199531791401 5.60312036949571 6.6498749811143485 0.576371 1.1409621741707825 -0.9891887459359732 Two -1.8970581795579 Core
Chr1 781902 783565 VDAG_JR2_Chr1g01720.1 3.0681569976941496 5.047815883566269 6.490837891976137 0.663259 1.3406109872375624 -0.9942843804424548 Two -1.12623683588113 Core
Chr1 783460 786409 VDAG_JR2_Chr1g01730.1 4.4153759641919015 5.609848376532719 6.40143574469056 0.564937 3.64711594049366 -0.994659721826191 Two 2.40941602176417 Core
Chr1 786474 788227 VDAG_JR2_Chr1g01740.1 6.14713328105325 5.4365895988935975 6.62810172017265 0.6160869999999999 4.4183325696360285 -0.989687237585598 Two 1.6159415339115302 Core
Chr1 788056 789009 VDAG_JR2_Chr1g01750.1 0.0 5.51914443164158 6.3973130212772 0.635887 4.071209234050022 -0.993247152307378 Three -5.1085585158601 Core
Chr1 789077 790156 VDAG_JR2_Chr1g01760.1 4.09366035185788 5.40373266275203 6.3168920041064 0.649676 3.2414951528967184 -0.987077501207203 Two -1.39379814820749 Core
Chr1 790172 794918 VDAG_JR2_Chr1g01770.1 6.95979868657264 5.80687227644012 6.49814306589271 0.558786 5.9686305066419445 -0.991204463122176 Two 3.09518218573506 Core
Chr1 795491 798934 VDAG_JR2_Chr1g01780.1 5.9163953850649 5.47148897592185 6.25706945474496 0.571304 5.542233198994888 -0.9929240973315708 Two 2.76009107085616 Core
Chr1 799196 801660 VDAG_JR2_Chr1g01790.1 6.42954372075863 5.5314003984332585 6.23905227357342 0.563718 7.789294687191701 -0.990372726662038 Two 4.5558005262639005 Core
Chr1 802513 803025 VDAG_JR2_Chr1g01800.1 6.230686243119999 3.90269464888735 6.63890053354426 0.7089840000000001 0.2560730231503323 -0.988997505942528 Two -6.88501115271346 Core
Chr1 803067 806406 VDAG_JR2_Chr1g01810.1 6.412562388099111 5.45290550013283 6.28831808011111 0.5552560000000001 3.5198730061875647 -0.9935030350273688 Two 1.52080634464931 Core
Chr1 806845 807528 VDAG_JR2_Chr1g01820.1 1.04125286592432 6.30241952534347 6.35566236459572 0.5124449999999999 4.9084471629678355 -0.987642793480017 Three -2.22223211639955 Core
Chr1 807849 810765 VDAG_JR2_Chr1g01830.1 5.29142861314667 5.24192387816453 6.008480804626981 0.595336 3.672706836530733 -0.988973646729388 Two 2.4398061839146497 Core
Chr1 811303 811937 VDAG_JR2_Chr1g01840.1 7.14153030626495 5.745826373946231 6.13791933439296 0.5347 1.7224940025381432 -0.9812904361045172 Two -5.86386096120816 Core
Chr1 812920 814391 VDAG_JR2_Chr1g01850.1 6.409444480802032 5.541081064565799 6.01646689328612 0.558124 1.77964964422228 -0.9905145514762248 Two -0.9797094217331328 Core
Chr1 815432 817543 VDAG_JR2_Chr1g01860.1 7.99530199043355 6.974059562285099 6.1515440703003215 0.539081 7.547579387182774 -0.990999850003025 Two -4.43877205159329 Core
Chr1 818175 819650 VDAG_JR2_Chr1g01870.1 6.6362298824137405 5.511062357144637 7.0906662889714 0.575593 3.0236340450071317 -0.993351623990634 Two 0.6104583087123809 Core
Chr1 819716 821007 VDAG_JR2_Chr1g01880.1 7.197827329395701 6.02524484461327 6.42402733353277 0.565453 8.732801688133257 -0.990175267136606 Two 1.3976793985061002 Core
Chr1 821204 822015 VDAG_JR2_Chr1g01890.1 5.7671694278386125 4.58128508258868 6.90278605861064 0.614057 1.6833852794373978 -0.99693695205344 Two -2.98819081975073 Core
Chr1 823708 826377 VDAG_JR2_Chr1g01900.1 6.41739771170519 4.90189522263329 6.3522102710439405 0.61746 1.3431117168066644 -0.9903479310599408 Two -0.5996337842727739 Core
Chr1 826418 828959 VDAG_JR2_Chr1g01910.1 6.51914846577838 5.72198813281069 6.25748876046645 0.562377 1.7024007648067667 -0.991532691030149 Two -0.329234924361057 Core
Chr1 829683 832465 VDAG_JR2_Chr1g01920.1 5.42892790308661 5.8916136298507205 6.306189111310459 0.554277 4.072613689564643 -0.991288473487283 Two 1.820546030935 Core
Chr1 832984 834672 VDAG_JR2_Chr1g01930.1 7.0675678456465985 6.17170934175201 6.201797295243808 0.556872 3.736103527566759 -0.9902112366233728 Two 0.729431736324123 Core
Chr1 834911 836789 VDAG_JR2_Chr1g01940.1 5.88514300246842 5.82017350215372 6.164265239795048 0.551651 7.201988107445848 -0.989245729206189 Two 4.47697490456229 Core
Chr1 837874 839108 VDAG_JR2_Chr1g01950.1 5.69080608518831 5.4003198841407 6.981747083425442 0.566451 1.8577220138116688 -0.993998486668634 Two -1.05939567277173 Core
Chr1 839476 844222 VDAG_JR2_Chr1g01960.1 6.80339060975233 5.35032836368789 6.21789588957314 0.554994 6.814194332237808 -0.99046571374006 Two 6.37294072797989 Core
Chr1 844209 846957 VDAG_JR2_Chr1g01970.1 6.52950563654938 5.51832133260238 6.59598504101387 0.549854 6.317221134231563 -0.992102438595626 Two 2.65308782955752 Core
Chr1 847149 848076 VDAG_JR2_Chr1g01980.1 7.50351590369868 5.90070740776838 6.38229856562173 0.576052 3.385893158412837 -0.993679939932676 Two -1.37146392403465 Core
Chr1 848108 852169 VDAG_JR2_Chr1g01990.1 6.773031742351072 6.26272874733968 5.80883060092537 0.505787 0.9044087391542722 -0.993560185032989 Two -0.8382129672323051 Core
Chr1 852371 853954 VDAG_JR2_Chr1g02000.1 7.27247933966703 6.076068914530588 5.976692250808611 0.500316 4.8023063523533605 -0.99281769621615 Two -0.707472819047803 Core
Chr1 854078 855676 VDAG_JR2_Chr1g02010.1 6.84209338561445 6.19759932598647 6.038617902983298 0.5413020000000001 8.584549784588157 -0.994433579818338 Two 2.78855208442817 Core
Chr1 856012 857068 VDAG_JR2_Chr1g02020.1 6.861769328799268 5.623534705299388 5.914317314272361 0.541667 2.6095982996317684 -0.993947494765174 Two -2.66738117195521 Core
Chr1 857929 858214 VDAG_JR2_Chr1g02030.1 7.42750311033101 6.20210682051796 6.9052837303081 0.522807 1.353508936884468 -0.993382121235492 Two -3.8254228600379 Core
Chr1 858658 860056 VDAG_JR2_Chr1g02040.1 6.23217887308257 5.886644531506339 6.7264084512628495 0.552217 7.797352378247763 -0.991358037691621 Two 5.575199125529151 Core
Chr1 860370 862115 VDAG_JR2_Chr1g02050.1 7.63772685040882 5.8503479144509605 6.27234930856349 0.582808 7.207540317083431 -0.988385074245934 Two 2.47850637655899 Core
Chr1 862830 866049 VDAG_JR2_Chr1g02060.1 5.2831180597731695 4.90004779307895 6.5398872475728895 0.5877600000000001 4.707785955430689 -0.990017904142748 Two 3.6290556142949 Core
Chr1 869574 870497 VDAG_JR2_Chr1g02070.1 5.964819996612179 5.50192380882151 7.12429475940287 0.593716 1.7297274268764844 -0.9920174150326752 Two -1.59365055674121 Core
Chr1 871348 872115 VDAG_JR2_Chr1g02080.1 4.4723718309714 4.7730989531656105 6.48696019135317 0.597132 2.3110535865611204 -0.991386869695292 Two -1.05057881793543 Core
Chr1 872101 874574 VDAG_JR2_Chr1g02090.1 4.8238101147668 4.13665307978808 6.62848585305173 0.670036 1.8897683788815305 -0.989392680391018 Two 0.0204874693598424 Core
Chr1 874695 875132 VDAG_JR2_Chr1g02100.1 1.40795145181701 4.90873490554154 7.81696728905121 0.695652 0.0 -0.9955768129658148 Three 31.765076 
Chr1 875400 877627 VDAG_JR2_Chr1g02110.1 5.247588114481281 5.13931376553458 6.5954291864549015 0.643018 2.1402261240772265 -0.9888809080364258 Two 0.249268255204769 Core
Chr1 877951 880737 VDAG_JR2_Chr1g02120.1 5.692319921526389 4.79463045052922 6.374934393211019 0.590811 4.615238924102038 -0.9910922904561228 Two 2.38294072390164 Core
Chr1 880913 882260 VDAG_JR2_Chr1g02130.1 5.7931570523028215 5.07264409053064 6.5787606286098805 0.679287 4.20030775130578 -0.984178852998009 Two 0.0235864621867262 Core
Chr1 882263 884815 VDAG_JR2_Chr1g02140.1 6.216035148652541 5.15438300821804 6.23406699161242 0.594828 4.884679023183667 -0.991613839741292 Two 2.5279614531359704 Core
Chr1 886921 887921 VDAG_JR2_Chr1g02150.1 7.428459003236389 6.43876441975071 6.5441378743083 0.535 1.3750830268572685 -0.991710327870612 One -2.08778252664553 Core
Chr1 888456 890472 VDAG_JR2_Chr1g02160.1 7.36778577585778 5.482042532632001 6.26449365559147 0.562004 4.345521300244116 -0.9916037656549732 Two -1.0452569162594 Core
Chr1 890578 892380 VDAG_JR2_Chr1g02170.1 6.542765082300769 5.305982912010951 6.27237742641796 0.5793560000000001 5.129057005611228 -0.991221452034445 Two 2.27575857531575 Core
Chr1 892849 893436 VDAG_JR2_Chr1g02180.1 0.6920010070151751 5.999212381473888 6.448460962514759 0.575809 0.5966121426339637 -0.993582663687893 Three -4.40421752556867 Core
Chr1 893825 897736 VDAG_JR2_Chr1g02190.1 5.37699705568596 4.944869987765942 6.421529715017001 0.601381 0.357160664293618 -0.9899738892811312 Two -2.5966620446659303 Core
Chr1 898862 905421 VDAG_JR2_Chr1g02200.1 5.7458454674282695 4.69736377641896 6.38943629376016 0.638512 2.0141064273987594 -0.991690305746723 Two 0.674484374625585 Core
Chr1 906257 909288 VDAG_JR2_Chr1g02210.1 5.29954378695893 5.1730686803132695 6.2292306174878 0.593863 5.423822766191924 -0.9902704769278772 Two 0.878637081855311 Core
Chr1 909612 912169 VDAG_JR2_Chr1g02220.1 6.022595669103921 5.446024071125112 6.30034130641851 0.5827140000000001 2.31531716734182 -0.9926347247395192 Two -1.94090270557505 Core
Chr1 913040 915789 VDAG_JR2_Chr1g02230.1 6.5534184650658895 6.161617948943071 6.13609805496917 0.53183 1.725551882058377 -0.9928686289260692 Two -0.0257654567053455 Core
Chr1 915929 920553 VDAG_JR2_Chr1g02240.1 6.10484201052037 5.254303734477951 6.3218068350403085 0.588884 2.826493915959565 -0.990167594774133 Two 1.1722622691606002 Core
Chr1 920602 921619 VDAG_JR2_Chr1g02250.1 0.77445553129491 4.08667975593845 6.93011570698954 0.657817 3.5290867386742364 -0.987804234424807 Three 0.763268096866002 Core
Chr1 921927 924106 VDAG_JR2_Chr1g02260.1 6.81922638044616 5.1698665742189 6.61468274595747 0.598899 1.8038605455073744 -0.987010536071708 Two -0.423136862537639 Core
Chr1 924345 925604 VDAG_JR2_Chr1g02270.1 0.0 4.49367844587501 6.8174661888238886 0.6942020000000001 3.79922676615919 -0.99202928889142 Three 0.40280456103984497 Core
Chr1 927868 930628 VDAG_JR2_Chr1g02280.1 4.37625021365224 4.4255244654605495 6.7004939244885495 0.6213770000000001 4.641127734173159 -0.992052289485942 Two -0.0981714247342906 Core
Chr1 931028 932534 VDAG_JR2_Chr1g02290.1 4.497761770541429 4.9853957961552 6.41462914496732 0.623506 3.671482869475623 -0.989993225562485 Two 1.46562545037377 Core
Chr1 932640 937046 VDAG_JR2_Chr1g02300.1 3.5231323010159303 6.12662209538686 5.91970239636914 0.5333640000000001 2.6037156060509443 -0.993396210871216 Two 1.78606498784244 Core
Chr1 938670 940537 VDAG_JR2_Chr1g02310.1 5.85057255716199 5.66174402885521 6.69057411015896 0.573112 7.132808315560423 -0.991085275192252 Two 0.443648006484949 Core
Chr1 940861 942548 VDAG_JR2_Chr1g02320.1 4.667656842775299 4.64961019437064 6.239268411577232 0.588026 5.0444754220263395 -0.989555103402659 Two 0.627158842664245 Core
Chr1 942396 944753 VDAG_JR2_Chr1g02330.1 6.55768883501621 5.34043854132585 5.9649670092862594 0.5443359999999999 6.284920295864199 -0.993558280374 Two 3.87546582792063 Core
Chr1 945857 947026 VDAG_JR2_Chr1g02340.1 7.292553123804259 5.377658054480982 6.17486453750915 0.54491 9.807867898155203 -0.991099597506696 Two 2.8782332160948 Core
Chr1 947258 949737 VDAG_JR2_Chr1g02350.1 5.82466921189072 5.56282105895753 6.3085273111407005 0.5518350000000001 3.7468542126818094 -0.991515673030464 Two 2.30938349267681 Core
Chr1 949674 950771 VDAG_JR2_Chr1g02360.1 5.19263856405061 6.18293804094754 6.08608044447943 0.516864 4.015090104895544 -0.989361168237208 Two 0.61618583380237 Core
Chr1 950958 953583 VDAG_JR2_Chr1g02370.1 4.740882534826451 4.82591282165443 6.50584042289858 0.647619 3.317735367443262 -0.991132243159368 Two 0.93250948694307 Core
Chr1 953850 956783 VDAG_JR2_Chr1g02380.1 6.16905441440137 5.167857270709759 6.222239795237348 0.576543 6.0101374141675965 -0.992232312760765 Two 1.9969235220819097 Core
Chr1 959481 962732 VDAG_JR2_Chr1g02390.1 4.6633086734196505 5.77844200976786 6.42922604518571 0.56598 6.070609102316734 -0.9900510122811428 Two 2.2189389198392795 Core
Chr1 962921 966599 VDAG_JR2_Chr1g02400.1 6.019109546614732 4.95169231518994 6.253668496811921 0.53888 3.559086082910428 -0.991694784266122 Two 2.64032996277502 Core
Chr1 966793 968541 VDAG_JR2_Chr1g02410.1 7.20506389588824 5.70513650570607 6.500793788182241 0.569222 7.780642518223258 -0.99324346663106 Two 4.04673929490019 Core
Chr1 969741 974558 VDAG_JR2_Chr1g02420.1 6.0450852716746 5.91375492731382 6.105548327051443 0.541416 4.606823585715193 -0.991503090088887 Two 3.1836559379956 Core
Chr1 974598 975409 VDAG_JR2_Chr1g02430.1 5.15987489747056 5.36656749031904 6.324247048248839 0.5980270000000001 4.711737707127279 -0.989644800160794 Two 0.6330515216380861 Core
Chr1 975572 976470 VDAG_JR2_Chr1g02440.1 0.487848199087035 5.76471478163787 6.22484133666486 0.593541 4.765901550128246 -0.988074690071954 Three -0.0789722261725209 Core
Chr1 976596 977765 VDAG_JR2_Chr1g02450.1 7.38348586176528 4.69919516926535 6.57993543255108 0.675791 4.417307407284717 -0.990522721696476 Two -2.09789795945007 Core
Chr1 978082 980066 VDAG_JR2_Chr1g02460.1 5.589979688246619 5.7170762385846 6.03640154423106 0.5665319999999999 1.4807077706687441 -0.990467394327317 Two -0.9260009534742192 Core
Chr1 980523 985487 VDAG_JR2_Chr1g02470.1 6.5014405696805895 5.504659807389048 6.44036631102988 0.572321 0.6436615446267574 -0.9910815547413948 Two -1.23717062093663 Core
Chr1 986061 987598 VDAG_JR2_Chr1g02480.1 0.304599822473272 6.003689756950741 6.29892665163797 0.5901109999999999 0.4425779525777676 -0.990656087538642 Three -3.294817639465549 Core
Chr1 988685 990922 VDAG_JR2_Chr1g02490.1 0.85406043221006 6.469617838395307 6.25781327572008 0.5865 6.865620035588098 -0.9919724638460672 Three 5.34173765888774 Core
Chr1 996235 997477 VDAG_JR2_Chr1g02500.1 6.32946055466544 5.13028385983871 6.454619853979 0.558776 5.713311355109779 -0.9957774749148092 Two -0.349703046987326 Core
Chr1 997858 999943 VDAG_JR2_Chr1g02510.1 4.326394553697671 5.6451339410245005 6.3327372254405 0.559233 5.039307263482395 -0.989088006665575 Two 1.53487379968999 Core
Chr1 1000609 1004176 VDAG_JR2_Chr1g02520.1 5.62696505892017 5.48306580344957 6.17929686251945 0.555649 4.077225800495887 -0.9910610208957048 Two 2.18083117421358 Core
Chr1 1004259 1005522 VDAG_JR2_Chr1g02530.1 4.5072647238915895 4.68800665184136 6.25483837594234 0.616785 5.144759904740513 -0.994559594015801 Two 0.27954974873075605 Core
Chr1 1005683 1008780 VDAG_JR2_Chr1g02540.1 6.12823305634536 5.0746747336441 6.16999019754372 0.588634 3.657764573787329 -0.992621700313574 Two 1.52923508876139 Core
Chr1 1009162 1010162 VDAG_JR2_Chr1g02550.1 5.59490224547803 6.0800626902175585 6.302766486534411 0.5379999999999999 9.058839031872017 -0.990161168680913 Two -2.27297894191166 Core
Chr1 1010510 1011605 VDAG_JR2_Chr1g02560.1 7.13858118885183 5.635699159306822 6.7042776334397605 0.595434 6.075114866842941 -0.9903316410281032 Two -0.667250573440813 Core
Chr1 1011608 1013174 VDAG_JR2_Chr1g02570.1 1.25358782984553 5.1671466168872895 6.5908904839572005 0.660281 3.4139360567462576 -0.9917785172302572 Three 0.304425348900085 Core
Chr1 1013316 1015365 VDAG_JR2_Chr1g02580.1 5.93381970614761 5.73799021614233 6.403637121709349 0.550024 4.378677481481208 -0.992846864597808 Two 2.66084530949026 Core
Chr1 1015599 1017996 VDAG_JR2_Chr1g02590.1 5.50195155910892 5.47184230705874 7.01355859523044 0.589487 1.405884713241077 -0.9899315639917758 Two -0.82077914107497 Core
Chr1 1018087 1020191 VDAG_JR2_Chr1g02600.1 5.76571591910662 5.98154183935313 6.08850356772897 0.534696 4.76881240581237 -0.989515251521175 Two 0.272877207838793 Core
Chr1 1020193 1021848 VDAG_JR2_Chr1g02610.1 3.92509690508125 5.944761442797249 6.066837441811299 0.548036 6.184827393931575 -0.991460159802156 Two -1.7932501635487 Core
Chr1 1022619 1023623 VDAG_JR2_Chr1g02620.1 0.443471207392016 5.408584624127768 6.40656535484886 0.580677 10.774579219145787 -0.9952659677263248 Three 0.332924289712676 Core
Chr1 1024857 1025728 VDAG_JR2_Chr1g02630.1 0.871566320513256 5.30799104717758 6.67598028561043 0.553387 1.7392338082292549 -0.99123388958405 Three -1.61154819626499 Core
Chr1 1025390 1026983 VDAG_JR2_Chr1g02640.1 2.58252424101435 4.7416836630329815 6.23212497424392 0.681733 3.757549265559968 -0.9900547362955452 Two -1.24707205123968 Core
Chr1 1027717 1028787 VDAG_JR2_Chr1g02650.1 6.266351483724768 4.6803429583495 6.42876575488157 0.6205609999999999 6.725485953073642 -0.995395344055492 Two 0.6272511662450639 Core
Chr1 1028830 1031088 VDAG_JR2_Chr1g02660.1 5.7496589466668295 4.95969526501945 6.25237972812615 0.638175 3.0378516643731963 -0.991760125864575 Two 1.31704969614386 Core
Chr1 1031116 1032671 VDAG_JR2_Chr1g02670.1 6.83487323161768 5.20519306296769 6.38863842390911 0.623794 4.490841964942455 -0.9886513079233372 Two 2.3743607701340297 Core
Chr1 1032967 1035166 VDAG_JR2_Chr1g02680.1 5.81268464171682 4.81909292477615 6.84141771096312 0.634379 6.154270866798799 -0.9892796317459048 Two 1.7641396680773702 Core
Chr1 1035524 1037776 VDAG_JR2_Chr1g02690.1 7.0918236886219 5.18353213368963 6.8083065904921 0.604796 2.65124808141417 -0.9920214173214827 Two -1.50227428566905 Core
Chr1 1037885 1041369 VDAG_JR2_Chr1g02700.1 6.63391529457692 5.32590852193476 6.32829514924991 0.570034 3.918982339436259 -0.990884198834596 Two 2.93589155650769 Core
Chr1 1042672 1045923 VDAG_JR2_Chr1g02710.1 6.28369882162702 5.58926301945818 6.25294082931944 0.548447 3.004078390046733 -0.991312380291804 Two 1.85880695174581 Core
Chr1 1046414 1048756 VDAG_JR2_Chr1g02720.1 6.477207268917768 5.4361176893616605 6.816314170636621 0.571734 1.6666193275244916 -0.99204919346334 Two -0.434664264415984 Core
Chr1 1049079 1051604 VDAG_JR2_Chr1g02730.1 4.33446584752238 5.25474758546679 6.380423499675031 0.633267 2.908991997142529 -0.98946782509858 Two 0.33349920510847403 Core
Chr1 1051654 1054772 VDAG_JR2_Chr1g02740.1 6.86744519480727 5.659620631542209 6.52523297741226 0.579538 4.436919324850199 -0.991621855111034 Two 3.3046712978083503 Core
Chr1 1055029 1057359 VDAG_JR2_Chr1g02750.1 6.96284303632784 5.73591765125274 7.04022043032733 0.567811 4.043171356095531 -0.989201073262112 Two 0.6572815067057471 Core
Chr1 1057763 1059194 VDAG_JR2_Chr1g02760.1 4.7141852750951 5.36479196074555 7.67688443931978 0.587002 0.2302014638693829 -0.991727643384934 Two -4.67451302898942 Core
Chr1 1059837 1064007 VDAG_JR2_Chr1g02770.1 6.52457212588578 5.19499245829061 6.44067042393938 0.579377 6.7778347096185065 -0.9889915496985408 Two 5.192453868394661 Core
Chr1 1064698 1065941 VDAG_JR2_Chr1g02780.1 6.83013830893823 5.345060986020879 6.605652672331869 0.633146 2.0571889934968115 -0.984241748602434 Two -0.700248380579011 Core
Chr1 1066695 1067769 VDAG_JR2_Chr1g02790.1 6.84183392859136 4.74472095490423 7.27536501875733 0.5949720000000001 1.308261851544755 -0.992481750872198 Two -2.09007046978081 Core
Chr1 1068507 1071953 VDAG_JR2_Chr1g02800.1 5.892421197638731 5.58107917294721 6.213259497241441 0.574869 6.210914586061734 -0.991104675067048 Two 2.8593416796861697 Core
Chr1 1072295 1074145 VDAG_JR2_Chr1g02810.1 4.87376567211385 4.65387185948197 6.5788837313422 0.6648649999999999 5.967623733054367 -0.9916074706412792 Two 4.06820345446919 Core
Chr1 1074907 1076427 VDAG_JR2_Chr1g02820.1 6.1180914116290985 5.6565755571564 6.41742867221423 0.5980260000000001 4.892855155118007 -0.9954762595569928 Two 2.7523560598638497 Core
Chr1 1076606 1078339 VDAG_JR2_Chr1g02830.1 0.8749597124794529 4.689911354531129 6.851248467119699 0.671091 5.352026640997371 -0.9931908072257628 Three 2.4496509414316003 Core
Chr1 1078381 1080329 VDAG_JR2_Chr1g02840.1 6.41917016562576 4.88070221351114 6.8499234237568 0.62731 2.4581409490754664 -0.992444025551642 Two -1.28720065601698 Core
Chr1 1080003 1082668 VDAG_JR2_Chr1g02850.1 6.66093939759628 5.17898901955282 6.235110867147322 0.582364 7.598977700422872 -0.992436705923531 Two 3.95210834335628 Core
Chr1 1082623 1085296 VDAG_JR2_Chr1g02860.1 3.70378843794013 4.875094881892991 6.799014051859452 0.603442 7.639781359717237 -0.990807901105512 Two 1.6308674887403798 Core
Chr1 1085463 1087237 VDAG_JR2_Chr1g02870.1 5.5366300252852785 4.80098128617617 6.57678030762437 0.6110479999999999 6.675471226196767 -0.9893133212027528 Two 0.7887011525944609 Core
Chr1 1087474 1090650 VDAG_JR2_Chr1g02880.1 4.9073525351224205 5.59123651321502 6.288419614898349 0.579345 5.100093705275904 -0.992826547806496 Two 4.04491814065206 Core
Chr1 1091165 1092528 VDAG_JR2_Chr1g02890.1 6.80826804017503 5.38737314020347 6.979139489020572 0.573734 2.2433260669985864 -0.9932206506260528 Two -0.34122525050733393 Core
Chr1 1093557 1098996 VDAG_JR2_Chr1g02900.1 6.433439460357749 5.3448345845096386 6.03393905456333 0.558191 4.755498494874604 -0.993031513893572 Two 2.62072955416882 Core
Chr1 1098893 1100887 VDAG_JR2_Chr1g02910.1 6.883313879067661 5.511266422287459 5.99904367245901 0.575727 4.632763295076973 -0.994246223353087 Two 1.04106467490705 Core
Chr1 1101775 1103178 VDAG_JR2_Chr1g02920.1 6.807285071711 5.3986343137832105 6.58280793107553 0.597292 2.220395290276142 -0.991823047124334 Two -0.4157961383908089 Core
Chr1 1104119 1104912 VDAG_JR2_Chr1g02930.1 8.05375756227984 4.66628805040225 6.9134451009155 0.620429 3.705966344367959 -0.992305608209999 Two 0.4734924990175661 Core
Chr1 1105363 1106562 VDAG_JR2_Chr1g02940.1 6.75860393663399 5.3565374856588095 6.55579251497345 0.584654 2.4678746783736583 -0.982539029933778 Two -0.305957640608215 Core
Chr1 1107374 1109838 VDAG_JR2_Chr1g02950.1 5.69310095548125 5.36108537426964 6.14738627539138 0.560471 2.728467630661716 -0.990094650917334 Two 0.200733475765609 Core
Chr1 1109648 1113876 VDAG_JR2_Chr1g02960.1 6.0376212036242 4.76379602043052 6.336274027400888 0.585147 4.968537831841727 -0.9939807819190608 Two 4.34648881331734 Core
Chr1 1116362 1118132 VDAG_JR2_Chr1g02970.1 5.6198504672444285 5.49601032178678 6.358793588584441 0.614124 4.232291735668132 -0.9909540263537592 Two 2.29539756918513 Core
Chr1 1118360 1120260 VDAG_JR2_Chr1g02980.1 5.601132765034 4.9642519737687 6.18036260464458 0.595263 7.795865322644019 -0.990469825187226 Two 3.5924088271414703 Core
Chr1 1120732 1123199 VDAG_JR2_Chr1g02990.1 5.77092462652457 5.79010932411291 6.280642626706281 0.580867 8.237048631886132 -0.991644175460175 Two 5.88341085272828 Core
Chr1 1126867 1129309 VDAG_JR2_Chr1g03000.1 5.857074658519782 5.67519405684135 6.34123334508029 0.5651109999999999 4.011176135601238 -0.991413328541364 Two 0.106870661755607 Core
Chr1 1130099 1130976 VDAG_JR2_Chr1g03010.1 7.43638001521266 5.76879783074573 6.5920281726989405 0.652223 3.0479544752614265 -0.989798224731441 Two -1.17284781370628 Core
Chr1 1132227 1133267 VDAG_JR2_Chr1g03020.1 5.25449680840574 5.10461351556243 6.3385207056416295 0.640385 5.349357570895396 -0.991464647133442 Two 2.5686428189014703 Core
Chr1 1133829 1134225 VDAG_JR2_Chr1g03030.1 0.0 6.40941006484813 6.2072976372859 0.532828 0.17149963828346934 -0.98606828726512 Three -6.88501115271346 Core
Chr1 1135199 1136614 VDAG_JR2_Chr1g03040.1 5.798144486395483 5.061318688186249 6.3467485098272585 0.561131 0.6482361439032368 -0.992220028111253 Two -3.0865217331751 Core
Chr1 1136788 1137588 VDAG_JR2_Chr1g03050.1 5.637410131842741 5.2638795658374296 6.815253178331702 0.7375 4.977321472099988 -0.9911558647725552 Two 1.72157478286781 Core
Chr1 1138590 1140696 VDAG_JR2_Chr1g03060.1 6.33586953955789 5.55580830395354 6.739838652082749 0.593542 4.467106568893487 -0.9942019270198008 Two 1.87083312967446 Core
Chr1 1140290 1141411 VDAG_JR2_Chr1g03070.1 7.37524602354845 5.46212145283262 6.766321638743071 0.64942 2.871639009468708 -0.99292686781339 Two 0.329950446299553 Core
Chr1 1143356 1146064 VDAG_JR2_Chr1g03080.1 0.617012024797484 5.2816130197352695 6.55366359262786 0.619645 5.0143426290014785 -0.9897833742775258 Three 2.78487366377751 Core
Chr1 1145677 1146714 VDAG_JR2_Chr1g03090.1 0.43127021446532704 5.27282385407795 6.47344408504618 0.688525 1.0769766404621413 -0.987971688841936 Three -3.48953718022717 Core
Chr1 1147194 1151600 VDAG_JR2_Chr1g03100.1 6.49931823433 5.749339013351753 6.561532539026032 0.590558 3.676440094587768 -0.991163617325186 Two 2.21743349444821 Core
Chr1 1147543 1147980 VDAG_JR2_Chr1g03110.1 1.40795145181701 6.071518248859402 6.91133954637385 0.6270020000000001 0.0 -0.9873502474022132 Three -4.65304256603375 Core
Chr1 1151752 1157205 VDAG_JR2_Chr1g03120.1 6.007730689612499 5.56289032047017 6.28624320003592 0.5699609999999999 3.0328673170161786 -0.9913638521066328 Two 0.8903779528093441 Core
Chr1 1157191 1158848 VDAG_JR2_Chr1g03130.1 6.1000536966511785 4.75613100522938 6.46592706777056 0.606518 4.366317954818822 -0.989413523334272 Two 0.384009541631641 Core
Chr1 1159070 1160615 VDAG_JR2_Chr1g03140.1 4.118535366241029 5.35300864144371 6.84707487742411 0.626537 4.6222431507155495 -0.993374122804243 Two 1.5604640339403897 Core
Chr1 1160758 1161687 VDAG_JR2_Chr1g03150.1 6.71743023663733 5.80144389354571 6.92746116300234 0.643703 5.422491906073806 -0.991195893908637 Two -1.26555263162807 Core
Chr1 1161731 1163120 VDAG_JR2_Chr1g03160.1 5.055514046575532 5.19948908142764 6.7611809759845185 0.643629 3.0157343446329388 -0.991466924607297 Two -1.73447358960484 Core
Chr1 1163243 1166752 VDAG_JR2_Chr1g03170.1 5.87687505437395 5.79691810432688 6.0048614630650805 0.552864 4.805364712672714 -0.9906976163268748 Two 2.93558451252811 Core
Chr1 1174477 1176133 VDAG_JR2_Chr1g03180.1 5.789929584945849 5.86322970132849 6.24177667978396 0.525362 6.352813863808748 -0.9914591065350028 Two -0.2831616059657069 Core
Chr1 1177504 1181017 VDAG_JR2_Chr1g03190.1 7.38547842296824 6.02710001225247 5.996527097544991 0.5257609999999999 3.997408236915035 -0.993382988474644 Two 3.0201790012352 Core
Chr1 1181143 1183038 VDAG_JR2_Chr1g03200.1 6.10195219277519 5.893547737976482 6.426193021576131 0.599472 5.917133856840646 -0.9901348690721692 Two 4.13552327076555 Core
Chr1 1183428 1189038 VDAG_JR2_Chr1g03210.1 5.598914631087201 5.3053027580792005 5.90363467372275 0.554189 4.405115028381692 -0.9921648010627042 Two 4.13827354291889 Core
Chr1 1189415 1191110 VDAG_JR2_Chr1g03220.1 5.5882376679556 5.83207257327374 6.131829345980622 0.5303829999999999 4.890849558662504 -0.988402710532644 Two 1.9727588 
Chr1 1192088 1194767 VDAG_JR2_Chr1g03230.1 5.464596813170449 5.303484648148982 6.66042942890147 0.5935050000000001 8.117123877795674 -0.992574523493484 Two 1.99947986660203 Core
Chr1 1195283 1196320 VDAG_JR2_Chr1g03240.1 5.16358030438998 5.582806032867769 6.60443919373383 0.5776279999999999 1.5713958588766104 -0.9972168883755992 Two -1.7096091620517702 Core
Chr1 1199257 1202400 VDAG_JR2_Chr1g03250.1 5.17700219534095 5.1606494191474015 6.60315339723191 0.5720649999999999 5.853790355692634 -0.991907452959202 Two 1.3653083570549398 Core
Chr1 1203413 1205309 VDAG_JR2_Chr1g03260.1 3.91665170972256 4.952132067536531 6.0198684363011585 0.599684 0.0 -0.992639295048746 Two -10.336293 
Chr1 1205430 1207697 VDAG_JR2_Chr1g03270.1 4.8365572936513 5.562186618522661 6.270069824047152 0.5483020000000001 4.3087173568255945 -0.987489241253648 Two 1.72787084948534 Core
Chr1 1207880 1208917 VDAG_JR2_Chr1g03280.1 0.762850986047752 5.804474301568719 6.43232955058244 0.556413 5.5750993326538385 -0.983821584977664 Three 0.45083309074673 Core
Chr1 1208968 1210217 VDAG_JR2_Chr1g03290.1 4.83196250735835 6.04663412670617 6.25579989190382 0.548439 11.477316983980133 -0.994220542933317 Two 0.367388628874226 Core
Chr1 1210376 1212637 VDAG_JR2_Chr1g03300.1 6.7321249524001585 6.16883943607885 6.04599359295022 0.534277 6.675288511163088 -0.990933125168163 Two 3.33764684359905 Core
Chr1 1212572 1213986 VDAG_JR2_Chr1g03310.1 6.05896209426077 5.02418744550042 6.48081928850491 0.637907 5.511341698908131 -0.9913588319943772 Two 3.33080254012137 Core
Chr1 1215675 1219989 VDAG_JR2_Chr1g03320.1 5.3792175159445295 5.65225944944001 6.19316145135895 0.563978 6.2642428215474855 -0.990819761958374 Two 3.83361510108069 Core
Chr1 1219945 1222370 VDAG_JR2_Chr1g03330.1 5.72383451090584 5.743702739238911 6.002829196733612 0.556701 5.8364628207282925 -0.990118488486036 Two 3.44449912969595 Core
Chr1 1223607 1228337 VDAG_JR2_Chr1g03340.1 6.28254358340232 6.04979164706042 5.7032554588191 0.533827 3.53619845216574 -0.989414386416912 Two 1.1322130322123 Core
Chr1 1229603 1230537 VDAG_JR2_Chr1g03350.1 7.0627187739810005 6.13445639496698 6.67531328853917 0.5428270000000001 1.7234856818837407 -0.989948836890196 Two -2.52315265385554 Core
Chr1 1231071 1232796 VDAG_JR2_Chr1g03360.1 6.1658349817018605 5.321783870872509 6.262002623556841 0.558261 7.035641767931567 -0.993702182813142 Two 3.28837711033895 Core
Chr1 1232801 1233448 VDAG_JR2_Chr1g03370.1 6.906266418103911 6.03875999365855 6.272095222460611 0.5564140000000001 5.610201660221845 -0.993380223357091 Two -0.18683039372891005 Core
Chr1 1233646 1237597 VDAG_JR2_Chr1g03380.1 6.8413455163873484 5.629933894014901 5.8688995502832695 0.5565680000000001 5.6442921854081005 -0.98936270710289 Two 3.94781663116994 Core
Chr1 1239124 1241352 VDAG_JR2_Chr1g03390.1 6.434009209830508 5.683009782149969 6.3790504132005 0.574955 6.579126208869577 -0.99168569021518 Two 4.07176049639191 Core
Chr1 1241901 1243962 VDAG_JR2_Chr1g03400.1 5.724962869840679 5.34456418093718 6.4390759545132985 0.5982529999999999 6.502249982259411 -0.990733253801097 Two 2.99147768452178 Core
Chr1 1244351 1246021 VDAG_JR2_Chr1g03410.1 4.77585304145199 6.50902082530766 6.14827421324262 0.545509 7.228340633691013 -0.9907680630583208 Two -1.56090807631722 Core
Chr1 1245869 1247796 VDAG_JR2_Chr1g03420.1 5.6741895859424805 5.1662414538963635 6.4985019699165 0.609237 3.3262233086586868 -0.9901024821008622 Two 1.45351639664008 Core
Chr1 1248046 1249230 VDAG_JR2_Chr1g03430.1 5.20980879730386 6.21845469978884 6.172632013171481 0.538007 2.1796754438998853 -0.993793823807398 Two -0.6301158627874499 Core
Chr1 1249531 1251499 VDAG_JR2_Chr1g03440.1 6.78687948266009 5.59102886437956 6.27970834133171 0.594512 6.048392819159732 -0.988242464689712 Two -0.4487788531379461 Core
Chr1 1250981 1255113 VDAG_JR2_Chr1g03450.1 6.722207214190823 5.78598270752159 6.107737211208839 0.544773 4.585194477495959 -0.9886864614630708 Two 1.6333455857820902 Core
Chr1 1255307 1256367 VDAG_JR2_Chr1g03460.1 6.82200360481856 6.670810343577862 6.04347714446559 0.5330189999999999 6.657793076491617 -0.994849184580621 Two -1.1295848187991495 Core
Chr1 1259880 1263664 VDAG_JR2_Chr1g03470.1 6.221456371220031 5.4830472547741 6.30559427228197 0.541226 4.621720110891005 -0.98763578508505 Two 3.81698668110804 Core
Chr1 1263759 1267554 VDAG_JR2_Chr1g03480.1 6.33938963216088 5.993693414410981 5.83433055603795 0.509091 3.0168416432846072 -0.988925166709942 Two 0.7465054373985591 Core
Chr1 1268283 1269390 VDAG_JR2_Chr1g03490.1 6.5797322530703415 6.0731944994885385 5.9976712093290105 0.523939 2.9532906647666524 -0.993384455592445 Two -0.7720099381271608 Core
Chr1 1270497 1273691 VDAG_JR2_Chr1g03500.1 5.47741789434572 5.83406235850292 5.976098608024548 0.53757 6.587583581032583 -0.992683213524882 Two 2.13275989298684 Core
Chr1 1277592 1278182 VDAG_JR2_Chr1g03510.1 0.689203341392061 6.50115597418216 6.95155215820011 0.554237 6.6291844260503785 -0.99241255554955 Three -0.735360384565885 Core
Chr1 1279845 1280343 VDAG_JR2_Chr1g03520.1 8.57979311861143 7.182196162168387 6.22453718543916 0.473896 3.856978085337186 -0.9914125041632758 One -3.608758634101621 Core
Chr1 1281796 1283534 VDAG_JR2_Chr1g03530.1 6.4267138235966375 5.875338735245099 6.37381150248867 0.5333720000000001 5.595983570525797 -0.98630497305347 Two 8.290527 
Chr1 1283653 1286695 VDAG_JR2_Chr1g03540.1 6.5852561746899605 5.757444186532661 6.16813659466115 0.5595 5.041866534309362 -0.989584067745029 Two 1.0550978046088002 Core
Chr1 1288181 1291681 VDAG_JR2_Chr1g03550.1 6.31583326374709 5.519812420782928 6.4318513102560315 0.5957140000000001 4.3749891320825425 -0.992115421711856 Two 2.50081645215245 Core
Chr1 1294614 1295858 VDAG_JR2_Chr1g03560.1 6.5129846035942105 5.38553871045163 6.319452636020429 0.595659 1.9255231383817528 -0.9924724692572652 Two -0.90192948271849 Core
Chr1 1296999 1298266 VDAG_JR2_Chr1g03570.1 5.2178795046995985 5.583951538510621 6.54380715470977 0.602999 4.620378555042475 -0.987185452025132 Two -0.6422520892560071 Core
Chr1 1298892 1300568 VDAG_JR2_Chr1g03580.1 6.227738876198112 6.03756273961197 6.869384500421409 0.551909 1.5091494534420595 -0.99383650860764 Two -1.07279868633781 Core
Chr1 1302799 1305258 VDAG_JR2_Chr1g03590.1 6.35944767240461 5.02522701497778 6.12549293939216 0.574217 6.805626019122343 -0.99100906220865 Two 2.55863618100497 Core
Chr1 1305340 1306656 VDAG_JR2_Chr1g03600.1 1.06916059258897 4.426425974280299 6.3246753749141 0.6565350000000001 2.8305117393902797 -0.984592065926255 Three -2.08096446658798 Core
Chr1 1307653 1313132 VDAG_JR2_Chr1g03610.1 6.1835271729206385 5.90156236478178 6.16689017815612 0.539149 3.685946364586627 -0.989385537807419 Two 3.3404728416178195 Core
Chr1 1314036 1315482 VDAG_JR2_Chr1g03620.1 2.85733341863221 5.42926907359161 6.39244795911904 0.5885199999999999 4.26026843606779 -0.990439097693333 Two 0.204550653298624 Core
Chr1 1315506 1317150 VDAG_JR2_Chr1g03630.1 5.34197464087687 5.43517052923913 6.52098338772413 0.582725 3.734469365651423 -0.990128147907995 Two 1.32474766612246 Core
Chr1 1319568 1323299 VDAG_JR2_Chr1g03640.1 6.14415127342623 5.8586625516555575 6.3034772581548095 0.553471 4.813554649874163 -0.990320806681105 Two 2.1378375569924 Core
Chr1 1323829 1324800 VDAG_JR2_Chr1g03650.1 6.14125340013296 4.89733890386638 6.54729514571077 0.589083 4.791356215539384 -0.9915877601838 Two 1.06435730040457 Core
Chr1 1324812 1325657 VDAG_JR2_Chr1g03660.1 0.8915559782776881 5.13411334248687 6.86597726471974 0.598817 4.130161814711204 -0.9917188249161992 Three 1.11482392675005 Core
Chr1 1325996 1331878 VDAG_JR2_Chr1g03670.1 4.59808468984382 5.43383424596673 5.95992204505574 0.554573 2.4137076168726384 -0.990638137399448 Two -0.43608596966148494 Core
Chr1 1333084 1335467 VDAG_JR2_Chr1g03680.1 2.43215674845561 4.79601209578769 6.39404293007799 0.59253 6.522817322898837 -0.991770256620466 Three -0.223768676382358 Core
Chr1 1335783 1338606 VDAG_JR2_Chr1g03690.1 6.48078427729213 5.921605585669321 6.06086670404994 0.527099 6.530353352259326 -0.9904070602591708 Two 1.46248122034152 Core
Chr1 1339624 1342751 VDAG_JR2_Chr1g03700.1 6.6291068962641 5.96492831380879 6.353157065008791 0.574033 6.003314459226214 -0.992214655176422 Two 2.51800292445983 Core
Chr1 1342735 1343834 VDAG_JR2_Chr1g03710.1 7.65261107690253 5.471968488586461 6.52233675118633 0.607825 6.63188084098591 -0.995848356729533 Two 1.63525676059644 Core
Chr1 1344288 1346929 VDAG_JR2_Chr1g03720.1 6.715775771989829 5.39888446301092 6.53951437629511 0.577433 5.986471550396884 -0.987452688031155 Two 3.72524944768004 Core
Chr1 1348928 1350375 VDAG_JR2_Chr1g03730.1 6.197947564043959 5.60273103123932 5.99231470604296 0.538355 6.1676396250692775 -0.9867533218734252 Two 0.11898125063406 Core
Chr1 1350518 1351854 VDAG_JR2_Chr1g03740.1 5.02864995218914 5.834605500167871 6.07693075675392 0.541916 1.9837807580722011 -0.991659359863348 Two -0.688483531146574 Core
Chr1 1354079 1358141 VDAG_JR2_Chr1g03750.1 6.098294767009518 5.503769131353461 6.04315250850131 0.5566220000000001 2.6688435999790685 -0.990648338374402 Two 0.80853246228256 Core
Chr1 1359373 1360751 VDAG_JR2_Chr1g03760.1 1.03477959719466 5.555943707954872 6.14312845287328 0.562409 3.8227089972742654 -0.987758877728622 Three 0.652125621417697 Core
Chr1 1360667 1362898 VDAG_JR2_Chr1g03770.1 3.6622561010065096 5.76992869447572 6.14617963335641 0.535634 4.234988264188424 -0.989671063366019 Two 2.7155897946564704 Core
Chr1 1364549 1367601 VDAG_JR2_Chr1g03780.1 5.592029963633079 5.135490417326492 6.5706366388648405 0.578637 3.741307380616208 -0.9908689882478722 Two 0.112747431556892 Core
Chr1 1367786 1368724 VDAG_JR2_Chr1g03790.1 6.9794308608991695 4.5111692983711125 6.6708723485535 0.6375270000000001 2.1915124393674854 -0.9921178366623392 Two -1.12943009732348 Core
Chr1 1370258 1372408 VDAG_JR2_Chr1g03800.1 5.09905518553225 5.96810979927077 6.357322111751009 0.5869770000000001 5.153109839371159 -0.989314181582474 Two 3.5144277670589195 Core
Chr1 1372663 1373305 VDAG_JR2_Chr1g03810.1 0.0 5.99874039877462 6.746764462482599 0.5342680000000001 5.157907016381853 -0.9862544887232548 Three 1.75035452480053 Core
Chr1 1373667 1379550 VDAG_JR2_Chr1g03820.1 5.95673441744368 5.723895333304911 6.38742473308311 0.568587 9.093568384091157 -0.991599634607986 Two 5.30782810022955 Core
Chr1 1380089 1381991 VDAG_JR2_Chr1g03830.1 0.8154578798787739 5.917986822961558 6.4116405667683605 0.565195 5.685628312306781 -0.990876439143538 Three 2.05707090510823 Core
Chr1 1382490 1385519 VDAG_JR2_Chr1g03840.1 5.728135680985191 5.0712725502807405 6.08157986105013 0.5519970000000001 2.6403111089857005 -0.991603060815584 Two 1.2706775716586 Core
Chr1 1385724 1387748 VDAG_JR2_Chr1g03850.1 2.19228092964992 6.070968340139589 6.00315841020905 0.528656 7.627200186708905 -0.99303111850966 Three 1.91654524909352 Core
Chr1 1387993 1390979 VDAG_JR2_Chr1g03860.1 5.45001317514007 5.74765532589118 5.9735251341259 0.525787 4.406285875768449 -0.989706978924121 Two -0.37246851984430107 Core
Chr1 1391207 1393061 VDAG_JR2_Chr1g03870.1 7.0268206173260594 5.81304883102365 5.88182165054562 0.529126 4.200514045456513 -0.99128913527143 Two 1.35832880256766 Core
Chr1 1393315 1396008 VDAG_JR2_Chr1g03880.1 6.67471403701862 6.22217951376979 6.015601401180612 0.551801 0.31192463099629403 -0.9897344044969292 Two -4.3624902315986 Core
Chr1 1396844 1401755 VDAG_JR2_Chr1g03890.1 3.4505134875140087 5.83780715022249 5.8666651919221 0.545714 2.759541299852466 -0.9905850868991422 Two 1.19124515538584 Core
Chr1 1402026 1403586 VDAG_JR2_Chr1g03900.1 5.15014981987716 5.7818628981576214 6.053005194562267 0.5564100000000001 10.615294364313053 -0.9925997405257472 Two 0.35976163575081 Core
Chr1 1403994 1405181 VDAG_JR2_Chr1g03910.1 7.871371240131039 5.8626905848233095 6.27571116886721 0.556866 5.062587638058154 -0.990278298516968 Two 1.56805733839309 Core
Chr1 1405878 1409466 VDAG_JR2_Chr1g03920.1 6.2729683484643 5.836459970800692 6.423018380231191 0.547938 10.265678909791738 -0.9924137769069707 Two 3.8158778202404497 Core
Chr1 1409819 1411687 VDAG_JR2_Chr1g03930.1 4.82132580300722 6.084853629547441 6.2205950336974 0.533191 6.452039430444639 -0.993466511113202 Two -0.719269504346728 Core
Chr1 1413232 1413870 VDAG_JR2_Chr1g03940.1 0.0 7.460637547680402 5.96915557310433 0.5 0.8938616668019888 -0.993230743987246 Three -3.66884814312988 Core
Chr1 1414173 1415747 VDAG_JR2_Chr1g03950.1 5.558866530233389 5.9352690977831 6.16375758384542 0.543837 5.110143798449782 -0.992895876333998 Two 3.0419193377846896 Core
Chr1 1416739 1418807 VDAG_JR2_Chr1g03960.1 6.3891397195372415 5.25230179287104 6.14814119065982 0.5560930000000001 7.090948513726863 -0.992022508158362 Two 2.592057765082 Core
Chr1 1419336 1421217 VDAG_JR2_Chr1g03970.1 7.84406666715525 5.62843785685417 6.299758365209381 0.5475810000000001 6.1331969394296015 -0.99481790017225 Two 2.49463840660394 Core
Chr1 1421893 1425352 VDAG_JR2_Chr1g03980.1 4.2374032861849305 5.72019397079834 6.37305908669685 0.566638 4.830427475018502 -0.9925017537288928 Two 1.04560887328092 Core
Chr1 1426402 1434331 VDAG_JR2_Chr1g03990.1 6.31809549052078 5.462287019379059 6.310043796663059 0.574347 4.227373267101332 -0.991077480901472 Two 4.61727067473253 Core
Chr1 1432797 1433472 VDAG_JR2_Chr1g04000.1 0.618498752162228 4.6066011658763 6.00368068889396 0.518519 0.0 -0.978187780437276 Three -1.62361819062575 Core
Chr1 1433477 1434331 VDAG_JR2_Chr1g04010.1 7.064448210730151 4.3760263558416 6.2797034724340905 0.663934 0.0 -0.9942998936481452 Two -1.8206782521603104 Core
Chr1 1434785 1438026 VDAG_JR2_Chr1g04020.1 6.13172492180119 5.899484928419841 6.13042130985932 0.586547 2.071995223497077 -0.99027507080352 Two 0.64111251741778 Core
Chr1 1438722 1441100 VDAG_JR2_Chr1g04030.1 6.29999475375861 4.59136741647094 6.6094150279396775 0.597561 2.145653686694681 -0.991125844546133 Two 0.33071132974515804 Core
Chr1 1441603 1442070 VDAG_JR2_Chr1g04040.1 7.00740128159614 4.517064850623241 6.528200339966871 0.7023550000000001 3.3158721573101766 -0.993351623990634 Two -1.9083406316168503 Core
Chr1 1442308 1443602 VDAG_JR2_Chr1g04050.1 5.10879646239064 5.86582924966222 6.47281412035353 0.606646 6.91577553962988 -0.9865384621183172 Two 1.67062743014706 Core
Chr1 1443839 1445274 VDAG_JR2_Chr1g04060.1 4.83008242236341 5.557778688275652 6.60681148442313 0.5909409999999999 6.310474796980164 -0.9918939153620152 Two 1.28579164295127 Core
Chr1 1446029 1446883 VDAG_JR2_Chr1g04070.1 0.509018541353914 4.16018728145364 6.74462227409015 0.693208 4.874780837011999 -0.9926129124786468 Three 1.70685736219484 Core
Chr1 1447223 1449360 VDAG_JR2_Chr1g04080.1 6.366214150803501 5.69784160361945 6.40598366878206 0.577913 5.43774964594046 -0.993089562482264 Two 2.8328215042607097 Core
Chr1 1452777 1454013 VDAG_JR2_Chr1g04090.1 5.92205482935115 5.45488049886585 6.45641071299528 0.580906 10.819366746455534 -0.993332163261434 Two 4.74406584468525 Core
Chr1 1456251 1457532 VDAG_JR2_Chr1g04100.1 5.70967439474838 5.79023840457218 6.58738726188774 0.556596 5.02057952023884 -0.995188606376332 Two 0.762388518584228 Core
Chr1 1458030 1460775 VDAG_JR2_Chr1g04110.1 6.43557078756045 5.1630394099165 6.4596174901127394 0.609472 5.196683323021867 -0.992928364003322 Two 2.9676328555929907 Core
Chr1 1461140 1463488 VDAG_JR2_Chr1g04120.1 6.98024088800014 5.44299065695756 6.56278624227008 0.618825 3.467242776767118 -0.9925168016833 Two 1.89385613282305 Core
Chr1 1464345 1469613 VDAG_JR2_Chr1g04130.1 5.55524263344358 5.32310219480495 6.01803534173206 0.546507 3.7910075452159036 -0.9919392920368332 Two 2.41009823529876 Core
Chr1 1469925 1472520 VDAG_JR2_Chr1g04140.1 4.82221173696877 4.82268006144117 6.42757922743234 0.60578 6.686702725967258 -0.98791670736147 Two 1.35759968190104 Core
Chr1 1474889 1476819 VDAG_JR2_Chr1g04150.1 1.32058030791601 5.5728772098571095 6.2278593573992405 0.5290159999999999 2.5440709359939637 -0.9909527595495 Three -3.602944150031621 Core
Chr1 1477158 1479357 VDAG_JR2_Chr1g04160.1 6.005811388673822 6.21603416227349 6.500689223723018 0.562983 1.529053096617914 -0.9918750723090258 Two -0.660761266554718 Core
Chr1 1480295 1483422 VDAG_JR2_Chr1g04170.1 5.71198751338797 6.3803340533259 6.0409704680357885 0.526383 1.7830580618605836 -0.99324895800892 Two 0.22953827695033904 Core
Chr1 1485516 1488389 VDAG_JR2_Chr1g04180.1 4.75662625206072 4.65944170000921 6.59848518119785 0.6286109999999999 2.5538095050803444 -0.9920754506250632 Two 0.168434395689822 Core
Chr1 1488725 1489819 VDAG_JR2_Chr1g04190.1 0.993348454109652 6.4786183391467205 5.929992726641903 0.547532 0.18170770664897426 -0.9900859506835088 Three -5.42496966958905 Core
Chr1 1490790 1493189 VDAG_JR2_Chr1g04200.1 6.2451313621059095 5.339576331674 6.6343572540929285 0.603168 3.0064611079891232 -0.993295903437686 Two 0.452007652526984 Core
Chr1 1493859 1496835 VDAG_JR2_Chr1g04210.1 6.194522089850073 5.59326347690567 6.48193064507005 0.581989 4.3211237698989695 -0.989937749117752 Two 2.15370102137465 Core
Chr1 1499790 1503225 VDAG_JR2_Chr1g04220.1 6.555955237777518 5.48057568115023 6.43551639623205 0.554585 5.8035787778526675 -0.991225523123182 Two 3.91844855210114 Core
Chr1 1503507 1504598 VDAG_JR2_Chr1g04230.1 5.324761579962 4.7167329489896614 6.4855830949007585 0.5884510000000001 6.3033626685434525 -0.990897792892747 Two -1.74012396949755 Core
Chr1 1505200 1510102 VDAG_JR2_Chr1g04240.1 5.706706784228983 5.62220523181104 6.20301620905984 0.5534479999999999 4.942083702368269 -0.991485753090917 Two 1.6562841350484498 Core
Chr1 1509995 1514089 VDAG_JR2_Chr1g04250.1 6.10019035195101 5.94574447939957 6.4257247011676215 0.565217 6.187788529678485 -0.9906302163295228 Two 4.5864197841951695 Core
Chr1 1515622 1517460 VDAG_JR2_Chr1g04260.1 5.788052588309059 5.18820378443606 6.45356048454093 0.566921 1.872362972322957 -0.991767361330529 Two -1.43421903571748 Core
Chr1 1518259 1520883 VDAG_JR2_Chr1g04270.1 6.84217573150907 5.88343719148685 6.26113806983354 0.5487810000000001 1.1114629883643838 -0.990922091060644 Two -0.991939905010909 Core
Chr1 1523016 1525189 VDAG_JR2_Chr1g04280.1 0.7356028259464821 5.1206487715303615 6.57900345809668 0.5715600000000001 4.799870773745419 -0.9925441950809528 Three 2.31964643920374 Core
Chr1 1525080 1526744 VDAG_JR2_Chr1g04290.1 5.6143189506217 5.70695326480749 6.407993369145499 0.6027640000000001 5.916422866133763 -0.9932741368116872 Two 4.01784930728687 Core
Chr1 1527651 1528372 VDAG_JR2_Chr1g04300.1 6.668549152621338 4.85063946984392 6.28843337888989 0.532594 3.6068477923778053 -0.980868139821804 Two -0.7005335890120059 Core
Chr1 1528768 1530318 VDAG_JR2_Chr1g04310.1 0.95040688773268 6.00963785095278 6.2724120256034 0.559355 3.7417773444052322 -0.989111683857264 Three 1.55682577635569 Core
Chr1 1531235 1532273 VDAG_JR2_Chr1g04320.1 8.52854595133224 5.7721100973532 5.89177508733605 0.5520229999999999 1.5959928738476086 -0.991362697997388 Two -1.4711687673634 Core
Chr1 1533731 1535869 VDAG_JR2_Chr1g04330.1 6.538125416435809 5.52190762251816 6.045039335618943 0.534144 4.691998645831446 -0.990133395840862 Two 3.02217441349768 Core
Chr1 1536199 1537550 VDAG_JR2_Chr1g04340.1 5.7392620070912095 5.6921836487440185 6.2992863065274 0.554404 10.811307566757307 -0.9935411246803728 Two 1.2100019616358202 Core
Chr1 1537550 1540072 VDAG_JR2_Chr1g04350.1 5.7123695361932025 5.468641508903708 6.385890990022111 0.582871 4.1285419844912585 -0.9919894572602892 Two 2.7235390253752594 Core
Chr1 1540347 1541447 VDAG_JR2_Chr1g04360.1 7.72034221042142 7.34633793878181 6.9382440858982894 0.620909 5.8353984496369025 -0.994296030250553 One 2.28418471580315 Core
Chr1 1542615 1545607 VDAG_JR2_Chr1g04370.1 6.680304216882711 4.70241541263084 6.6274698668377985 0.610628 6.476598960910889 -0.990649002707684 Two 5.37300233839516 Core
Chr1 1546057 1548633 VDAG_JR2_Chr1g04380.1 6.63608920126153 5.32633111173092 6.634356347974429 0.62073 4.280802430925865 -0.991349426692392 Two 2.8701932584568 Core
Chr1 1548910 1552086 VDAG_JR2_Chr1g04390.1 5.6963314919576 5.63581428775775 6.30971013928268 0.569584 3.0173853339433414 -0.989968804596536 Two -8.36716267216147 Core
Chr1 1552549 1553514 VDAG_JR2_Chr1g04400.1 0.8063923455770909 2.9572674976837794 6.48988281178673 0.684974 3.73870725091972 -0.979680015620404 Three -0.0598058346238997 Core
Chr1 1553631 1557914 VDAG_JR2_Chr1g04410.1 6.15183364304824 5.67956250179267 6.39220064290645 0.56339 2.4763019548270364 -0.988249886683172 Two 1.6343102074524 Core
Chr1 1558377 1559826 VDAG_JR2_Chr1g04420.1 6.51199952051401 5.84440564296284 6.62553077895255 0.575569 4.1447133284396696 -0.9945957214347108 Two 1.9264304285148 Core
Chr1 1560316 1562041 VDAG_JR2_Chr1g04430.1 7.5804139835664 5.108380822337129 6.2993339354109095 0.5571010000000001 5.660570077439372 -0.989941813241805 Two -0.538428115558587 Core
Chr1 1563766 1565989 VDAG_JR2_Chr1g04440.1 4.5602347974578 4.97898092705386 6.1492758722009695 0.602789 3.901498233883906 -0.99187392625894 Two -0.8829554579635699 Core
Chr1 1566135 1568161 VDAG_JR2_Chr1g04450.1 6.40022980758421 4.77245877907303 6.56269046022221 0.610069 5.391154372773354 -0.991930050003489 Two 0.4603882540013371 Core
Chr1 1569454 1572060 VDAG_JR2_Chr1g04460.1 4.858305230020171 5.011206529184469 6.667865439870981 0.6128170000000001 3.481061532099517 -0.990178643470049 Two 2.02929536643112 Core
Chr1 1572402 1575041 VDAG_JR2_Chr1g04470.1 5.40886319325228 5.2785360994750805 6.55923652379649 0.61349 4.647400868569137 -0.990318696134997 Two 0.4533355466258621 Core
Chr1 1575312 1576465 VDAG_JR2_Chr1g04480.1 6.3876522335481285 5.27895140838396 6.58101357829074 0.5915 5.919728485233796 -0.992008592807423 Two 1.58451309907498 Core
Chr1 1576437 1578085 VDAG_JR2_Chr1g04490.1 5.99329813750971 5.3547668151495404 6.51012781610603 0.636529 3.1356671105538143 -0.9917978538168648 Two 0.0981112530777692 Core
Chr1 1578315 1586273 VDAG_JR2_Chr1g04500.1 4.93128216842206 5.58641141495316 6.01821013668483 0.533049 4.764778021648682 -0.989575963615457 Two 4.05362746802625 Core
Chr1 1586931 1589669 VDAG_JR2_Chr1g04510.1 5.5763567490848605 5.3417125587145975 6.02051236301057 0.5620890000000001 2.4521484460776053 -0.991911719892167 Two 0.91068730913663 Core
Chr1 1589803 1591251 VDAG_JR2_Chr1g04520.1 0.584047992415378 5.36613819678772 6.5199128045306525 0.5745859999999999 6.142057217546929 -0.9952987492707572 Three 1.09312480063838 Core
Chr1 1591849 1594225 VDAG_JR2_Chr1g04530.1 4.26664199840325 5.50251926998352 6.52204371064556 0.599747 3.192144123360752 -0.9905436457076592 Two 1.62315293224348 Core
Chr1 1594191 1595898 VDAG_JR2_Chr1g04540.1 4.93701815278566 6.3584634248413385 6.27273099515303 0.554189 7.224626068717733 -0.9896635444518728 Two 1.13362626614034 Core
Chr1 1596857 1598159 VDAG_JR2_Chr1g04550.1 1.25551654722134 6.0424845394792 6.46125446159758 0.532258 1.2723193495855534 -0.9942483842456072 Three -1.85567563047275 Core
Chr1 1598672 1601134 VDAG_JR2_Chr1g04560.1 7.059326917368821 5.544970509568549 6.385890990022111 0.573517 10.803798849240687 -0.994023719477104 Two 3.67889079869263 Core
Chr1 1601994 1602775 VDAG_JR2_Chr1g04570.1 6.63719847959772 6.2908816564551 6.12156093167492 0.513444 2.0042378240092464 -0.991305010522758 Two -1.86423481276905 Core
Chr1 1603404 1605126 VDAG_JR2_Chr1g04580.1 5.940835236287509 6.011955346776331 6.173421781512362 0.559233 0.3653697016500879 -0.9892067199259972 Two -3.4038745381367006 Core
Chr1 1605412 1607719 VDAG_JR2_Chr1g04590.1 5.684543043973321 5.186122435896031 6.40288511650242 0.610316 3.6874466284648615 -0.992288569539927 Two -0.32574369847737 Core
Chr1 1609460 1611625 VDAG_JR2_Chr1g04600.1 5.060748183873571 5.34768126443034 6.536826930634072 0.599538 5.396332019034097 -0.990026108158141 Two 2.83460465603023 Core
Chr1 1612656 1617139 VDAG_JR2_Chr1g04610.1 4.9191657516232095 5.39242366541826 6.356445613104402 0.575284 4.433553911495835 -0.9935676290084192 Two 3.9434475898603902 Core
Chr1 1616709 1617766 VDAG_JR2_Chr1g04620.1 0.4241993662065821 4.13349903711934 6.431464596626822 0.695364 4.429216153594238 -0.99060130199775 Three 0.14004981183195905 Core
Chr1 1618080 1620508 VDAG_JR2_Chr1g04630.1 7.309160585992041 5.81398821967826 6.249720621505751 0.550659 6.686837331183036 -0.988047197238235 Two 2.08797771083238 Core
Chr1 1621789 1623680 VDAG_JR2_Chr1g04640.1 5.8372958566223705 5.24072064029418 6.71255232571894 0.561079 14.334825421783213 -0.985896485902649 Two 6.646625034939111 Core
Chr1 1624220 1626004 VDAG_JR2_Chr1g04650.1 4.5283003703828 6.863777674679589 5.82139368603901 0.5168159999999999 0.8351472691264168 -0.991890988929756 One -2.5252655150761 Core
Chr1 1626685 1627110 VDAG_JR2_Chr1g04660.1 1.82799633926016 6.25494210926803 5.937082004688518 0.5317649999999999 0.0 -0.995076121360715 Three 31.440107 
Chr1 1627832 1629278 VDAG_JR2_Chr1g04670.1 5.097302806096031 5.779592610626402 6.54855034554023 0.6300140000000001 2.3598863198641133 -0.989011908965915 Two -2.53790572769736 Core
Chr1 1629407 1631463 VDAG_JR2_Chr1g04680.1 5.577295722992799 4.385046521053201 6.73987711751473 0.632782 5.944776041283804 -0.988351335185437 Two 3.31778090658872 Core
Chr1 1631676 1632788 VDAG_JR2_Chr1g04690.1 5.626824110366889 4.95535294705779 6.72545418106354 0.636691 5.493319420230273 -0.99319367547262 Two -0.20045625612295695 Core
Chr1 1632713 1635954 VDAG_JR2_Chr1g04700.1 3.6158447124598494 4.736555714737509 6.66385842253342 0.614008 3.1810855588474265 -0.989066176389338 Two 2.0385930965810504 Core
Chr1 1636956 1638702 VDAG_JR2_Chr1g04710.1 2.03704949996664 5.0179304659122685 6.77432893223144 0.632875 4.6133162865100505 -0.990958769721173 Three -0.151885998655498 Core
Chr1 1638699 1641501 VDAG_JR2_Chr1g04720.1 6.8821010841714 5.34554554037292 6.275629133468901 0.583869 5.827505389454387 -0.9924809255705008 Two 4.60408081363301 Core
Chr1 1642447 1643837 VDAG_JR2_Chr1g04730.1 4.11902436209367 5.19499245829061 6.432970989463708 0.544604 4.947848110925002 -0.992779740746157 Two 1.5974100518216598 Core
Chr1 1645633 1647727 VDAG_JR2_Chr1g04740.1 1.1426249354072 5.55307072947557 6.2011991177768895 0.5596939999999999 7.192734801094708 -0.9913401722235408 Three 3.12761439390098 Core
Chr1 1647804 1648975 VDAG_JR2_Chr1g04750.1 4.93643916181707 5.9571572781048205 6.27326874909711 0.5508109999999999 4.988758864151201 -0.990568874808402 Two 2.45929817215919 Core
Chr1 1650214 1651515 VDAG_JR2_Chr1g04760.1 6.24234119065054 5.815150965903679 6.789448290512531 0.5626439999999999 5.321997747532438 -0.994548661411619 Two -4.98727678543216 Core
Chr1 1652470 1653665 VDAG_JR2_Chr1g04770.1 0.9313494397138852 5.6190193380951605 6.2833242512111696 0.569874 4.681662337063718 -0.9938515186778332 Three -2.58937874497385 Core
Chr1 1653969 1654818 VDAG_JR2_Chr1g04780.1 1.1869569968644298 5.742308392483469 6.38756898133165 0.5630149999999999 3.7505256606656734 -0.993856505801355 Three 0.6906492755621171 Core
Chr1 1654914 1655578 VDAG_JR2_Chr1g04790.1 5.704583290072111 5.36028160880755 6.9860134860738095 0.563253 3.4091846422151835 -0.988956351466508 Two -0.11967301675707198 Core
Chr1 1656453 1657457 VDAG_JR2_Chr1g04800.1 0.443471207392016 4.00839989980696 7.1486622931725 0.613546 4.316581660927089 -0.9946322801431592 Three 1.26982272299227 Core
Chr1 1661461 1662098 VDAG_JR2_Chr1g04810.1 1.93961870526185 5.57909032623171 7.0725725746097 0.598116 0.10673764717547783 -0.996508903218678 Three -6.88501115271346 Core
Chr1 1663193 1664086 VDAG_JR2_Chr1g04820.1 5.11195662635932 4.4665264932375095 6.9720195258386095 0.639418 1.1837374103915812 -0.992341647685463 Two -2.66868387074636 Core
Chr1 1664039 1664337 VDAG_JR2_Chr1g04830.1 7.8765412611165795 4.68961796873032 6.705003798749981 0.516779 0.5910659824753524 -0.992725891946679 Two -5.0106808529876 Core
Chr1 1664697 1666032 VDAG_JR2_Chr1g04840.1 7.37820322819155 5.4656412663082 6.747593082078309 0.625468 4.567058937697924 -0.99201298093856 Two 1.09692076606495 Core
Chr1 1666281 1667348 VDAG_JR2_Chr1g04850.1 6.63719847959772 5.22832183606638 6.51731981164469 0.5623239999999999 1.6573386034284383 -0.9943133744233827 Two -1.6991894120146298 Core
Chr1 1668128 1671114 VDAG_JR2_Chr1g04860.1 7.25604300098421 5.68539890780426 6.2959438109607015 0.588078 3.4913960757118843 -0.9889326960971628 Two 2.66765448245652 Core
Chr1 1671205 1672226 VDAG_JR2_Chr1g04870.1 5.77583569160183 5.409719006465581 6.7966091255685 0.562194 3.319600663814493 -0.992381790662746 Two -3.6032672 
Chr1 1672717 1674210 VDAG_JR2_Chr1g04880.1 5.144232123120469 5.68192458834593 6.54341445517066 0.621567 2.4696711259046045 -0.994023005263948 Two -0.8870947732724109 Core
Chr1 1674377 1676186 VDAG_JR2_Chr1g04890.1 6.37311494010664 4.8092920317765095 6.3623229928265586 0.641791 4.624670460985577 -0.990345892377722 Two -0.7138658853072791 Core
Chr1 1676477 1677929 VDAG_JR2_Chr1g04900.1 5.04876003579823 6.57776839255017 6.8987563773224005 0.5585399999999999 8.30228003082048 -0.989134049661834 Two 1.8148861472359896 Core
Chr1 1678075 1680189 VDAG_JR2_Chr1g04910.1 0.751596783012899 5.55045486299276 7.055332533129112 0.594607 7.539692722108924 -0.989691215464594 Three 3.4899696159382403 Core
Chr1 1680368 1681900 VDAG_JR2_Chr1g04920.1 4.95196488130449 5.80129385413494 6.30422448287871 0.5372060000000001 3.635909349906628 -0.992535929184985 Two 0.33660897010678703 Core
Chr1 1681757 1682779 VDAG_JR2_Chr1g04930.1 7.541110947513831 5.63523267758484 6.30951753158628 0.596869 4.148212847003859 -0.9896534201743922 Two 5.3127375 
Chr1 1682762 1683832 VDAG_JR2_Chr1g04940.1 5.49937942181654 6.0099538606264815 6.75595615995633 0.618692 2.3622460723255174 -0.981855506272788 Two -0.512952094412908 Core
Chr1 1684508 1686665 VDAG_JR2_Chr1g04950.1 5.805864486316152 5.695833704259631 6.58955434074738 0.578118 7.70822434467654 -0.9928742121351222 Two 1.50008291210253 Core
Chr1 1686488 1687932 VDAG_JR2_Chr1g04960.1 6.789136886214499 6.04282586548828 6.518467456653 0.6121880000000001 2.2505897126715686 -0.9937072855474168 Two -0.19928021805108895 Core
Chr1 1688323 1689709 VDAG_JR2_Chr1g04970.1 6.439056849187652 6.98718845452513 6.34274251097279 0.518759 2.168571308098239 -0.990483208506405 One -0.406466558005281 Core
Chr1 1690399 1692226 VDAG_JR2_Chr1g04980.1 8.03476631443528 8.613400231010049 5.80564552852249 0.473454 1.066320350387583 -0.9902421336437328 One -3.47551501570998 LS
Chr1 1692622 1694000 VDAG_JR2_Chr1g04990.1 6.82967285237878 7.534150715576709 6.59839631280588 0.537736 2.918434274115534 -0.9931614124289828 One 0.510080039830335 LS
Chr1 1696788 1697894 VDAG_JR2_Chr1g05000.1 7.43325539861366 8.54410826662201 5.94865268797372 0.529837 0.7825791778996721 -0.990770747559606 One -2.97454550683613 LS
Chr1 1699397 1701820 VDAG_JR2_Chr1g05010.1 7.09010833832747 7.30345098036199 6.3292994139651215 0.569542 0.19578774105029992 -0.98954241767154 One -4.1937498249598 LS
Chr1 1702506 1703722 VDAG_JR2_Chr1g05020.1 5.52869560705602 5.60645339462023 6.3162468265279985 0.597862 2.4555725141496816 -0.991963924530533 Two -0.197997433924353 Core
Chr1 1703571 1706089 VDAG_JR2_Chr1g05030.1 6.37887015557528 5.46769309232267 6.49977900744146 0.601668 1.0793663741663706 -0.98758608396085 Two -1.18452245443121 Core
Chr1 1706444 1708450 VDAG_JR2_Chr1g05040.1 1.3901393966559 5.14540368321772 6.5291788693016 0.600698 2.4404416836547176 -0.982821204150695 Three 0.37083080889931 Core
Chr1 1708433 1709504 VDAG_JR2_Chr1g05050.1 0.7439187097523678 5.85939749045303 6.51766064010929 0.582633 5.102633824178222 -0.985731130324664 Three 2.4873375432771097 Core
Chr1 1709514 1710743 VDAG_JR2_Chr1g05060.1 6.370317599124808 4.943588381890071 6.830525193643861 0.5834010000000001 3.536299025942685 -0.9906886533565128 Two 1.0307766321453 Core
Chr1 1712547 1714169 VDAG_JR2_Chr1g05070.1 4.67261018431767 5.8012810272876205 6.47450976544518 0.571517 1.3929695528406558 -0.992090862100214 Two -1.3175597924401898 Core
Chr1 1715404 1716057 VDAG_JR2_Chr1g05080.1 7.42603803337121 5.74012670343881 6.69220578374246 0.566616 5.905822266677784 -0.993486693041326 Two -1.11538282482229 Core
Chr1 1716018 1716728 VDAG_JR2_Chr1g05090.1 0.593487520718864 5.443382752715322 6.572687052797789 0.6309859999999999 6.416989161454654 -0.990370533703082 Three -0.13429789595434 Core
Chr1 1716955 1719014 VDAG_JR2_Chr1g05100.1 6.2892973808893 5.11385252927206 6.388427188729018 0.5998060000000001 5.720362326872863 -0.99272811407555 Two 2.20783549545778 Core
Chr1 1719331 1720252 VDAG_JR2_Chr1g05110.1 6.46093004997909 5.77897293293761 6.832635837772501 0.598263 4.956157624092117 -0.9884660674876428 Two -1.12239659139525 Core
Chr1 1721039 1723315 VDAG_JR2_Chr1g05120.1 6.86504013075466 5.45343349669593 6.40001758150275 0.559754 5.590306322249578 -0.9874991159490892 Two 3.10525206494026 Core
Chr1 1723409 1724709 VDAG_JR2_Chr1g05130.1 6.17848691623776 6.230943326615 6.7186554959974885 0.607692 1.026618684590739 -0.985749830945352 Two -2.17614638676217 Core
Chr1 1725289 1729829 VDAG_JR2_Chr1g05140.1 6.1681091344386685 6.8509547189005175 6.28084905925128 0.527753 3.3921428910502214 -0.992461588904876 One 2.76692755978459 Core
Chr1 1730035 1731856 VDAG_JR2_Chr1g05150.1 6.6468391689567685 5.38997648900958 6.80092087824376 0.6183420000000001 2.8015280235405733 -0.987809855307733 Two 0.7798026899051271 Core
Chr1 1731847 1734934 VDAG_JR2_Chr1g05160.1 5.510752843504091 6.01025693923749 6.570431011661661 0.577583 4.384524667090477 -0.992410435508853 Two 3.2804616611572004 Core
Chr1 1735658 1737300 VDAG_JR2_Chr1g05170.1 4.85526988881551 6.395917709832162 6.6825029545534695 0.5615100000000001 4.597439438245393 -0.9931531766639772 Two -0.6702371203315071 Core
Chr1 1737550 1739669 VDAG_JR2_Chr1g05180.1 0.596011133040445 5.2248322803098 6.45911847636377 0.607834 6.658756302747379 -0.993399077792297 Three 3.2441894016509902 Core
Chr1 1739589 1741248 VDAG_JR2_Chr1g05190.1 0.52163155441291 5.75947602045257 6.53461861309013 0.586498 3.4924869149370914 -0.99028133912987 Three 1.45927261770872 Core
Chr1 1741612 1745143 VDAG_JR2_Chr1g05200.1 5.929857775761 5.19059430489067 6.46457888821046 0.578873 4.770466104715408 -0.991869306408111 Two 2.8884500981679 Core
Chr1 1745904 1747363 VDAG_JR2_Chr1g05210.1 0.319205718375844 5.635851316742199 6.63939683809868 0.59767 4.963839435134012 -0.9903957179429028 Three 0.331071063149708 Core
Chr1 1748034 1748866 VDAG_JR2_Chr1g05220.1 5.6079099655192985 5.2030091043654405 6.5147395124341285 0.582933 1.906400751596983 -0.984232684141683 Two -1.6006557475683103 Core
Chr1 1750650 1751531 VDAG_JR2_Chr1g05230.1 5.8581318200912 6.841625120920732 6.33036388236367 0.4687850000000001 6.9489234387784435 -0.99488405477768 Two -2.26083825692016 Core
Chr1 1751689 1752548 VDAG_JR2_Chr1g05240.1 0.506519796763612 5.04367982769351 6.30102517269363 0.651921 5.070785426503149 -0.9944820358845872 Three -3.67813801857162 Core
Chr1 1752659 1754069 VDAG_JR2_Chr1g05250.1 5.100659682956231 5.21622600097572 6.59740149183387 0.602837 1.6414727781081777 -0.9928092175958008 Two -2.1187036383705697 Core
Chr1 1755250 1756913 VDAG_JR2_Chr1g05260.1 6.35059168634938 6.44313413043107 6.49825757061047 0.5616359999999999 0.9706918320471559 -0.98888468750685 Two -2.24287551951479 Core
Chr1 1758021 1763605 VDAG_JR2_Chr1g05270.1 4.84266063076863 6.93406993031533 6.4481749927994 0.57414 0.1114896938930525 -0.991510877925989 One -3.81254929334925 Core
Chr1 1763805 1764513 VDAG_JR2_Chr1g05280.1 6.75714006913392 7.56439914522232 6.42951808826423 0.5310729999999999 0.8877270197044348 -0.994123433663331 One -4.36878353563982 Core
Chr1 1768378 1770207 VDAG_JR2_Chr1g05290.1 7.306031556208731 6.15631493200977 6.49034713767002 0.584472 3.0698648690005883 -0.9920971217535348 Two -0.934135523832764 Core
Chr1 1770260 1772081 VDAG_JR2_Chr1g05300.1 3.98923410035739 6.48372072204772 6.722506439582079 0.565623 4.508632489533358 -0.990992832704963 Two 2.46386498985248 Core
Chr1 1772181 1773305 VDAG_JR2_Chr1g05310.1 0.0 5.646890883625868 6.88958317437933 0.613879 5.339273171822321 -0.995930973370318 Three 0.928923661705765 Core
Chr1 1774270 1774917 VDAG_JR2_Chr1g05320.1 1.08194188010287 7.18704615742231 6.230169662075782 0.587326 5.053853016574006 -0.990817327296063 Three -5.70336345282141 Core
Chr1 1776511 1778171 VDAG_JR2_Chr1g05330.1 5.57883034855937 5.28538542341174 6.28881219712545 0.5951810000000001 1.4565185252749533 -0.987632862573667 Two -1.21108427431775 Core
Chr1 1778288 1779289 VDAG_JR2_Chr1g05340.1 1.05856074029029 6.46373212674895 6.425684323170153 0.535465 3.8138804062101705 -0.988265937421196 Three 0.0909638451885849 Core
Chr1 1781372 1783391 VDAG_JR2_Chr1g05350.1 7.073391846234982 5.382013219975573 6.50443690790861 0.580485 2.7926057588391013 -0.9939212197670172 Two -0.0798045663114965 Core
Chr1 1784638 1786465 VDAG_JR2_Chr1g05360.1 7.19722507411126 6.923261290026421 6.39754692516695 0.605364 1.6803946917662769 -0.993122125915035 One -1.01636969078817 Core
Chr1 1787288 1788125 VDAG_JR2_Chr1g05370.1 8.36415448650602 7.45107669837729 6.21684489384765 0.5448029999999999 0.673157811243518 -0.993349921455538 One -3.6632558216603295 Core
Chr1 1788248 1789337 VDAG_JR2_Chr1g05380.1 5.5883609309462585 7.13783320671264 6.484130535167298 0.632691 0.0 -0.993330493567004 One -15.874427 
Chr1 1790274 1791849 VDAG_JR2_Chr1g05390.1 7.277610152608348 7.7393693464361215 6.29274508043764 0.574603 0.0 -0.985678847977062 One -8.808564504355939 Core
Chr1 1791887 1795078 VDAG_JR2_Chr1g05400.1 4.25674978682032 8.3314182549833 6.0573909725463295 0.502664 1.5384831221880064 -0.989538061181376 One -0.0544467852052869 Core
Chr1 1795826 1796991 VDAG_JR2_Chr1g05410.1 6.76723548859374 7.27884792678095 6.4779217652485 0.562232 4.006448307667768 -0.993530504670442 One 0.488015369476455 Core
Chr1 1797835 1799760 VDAG_JR2_Chr1g05420.1 6.682719237898071 7.6372237411051795 6.30283185241786 0.5511689999999999 0.7182473324503444 -0.99330379377628 One -2.28275672632535 Core
Chr1 1800029 1801079 VDAG_JR2_Chr1g05430.1 7.15408662937266 8.40382100176429 6.0119141867684185 0.5361899999999999 0.0 -0.99427374976221 One -18.58837 
Chr1 1802009 1803073 VDAG_JR2_Chr1g05440.1 7.04523988649328 8.66793383692202 6.09714151291769 0.5037590000000001 0.0 -0.994929010452578 One -18.635134 
Chr1 1803897 1805160 VDAG_JR2_Chr1g05450.1 3.5693480082150697 8.073867837107759 6.030649762511518 0.541568 0.0 -0.992736878227806 One -15.7615795 
Chr1 1805380 1806738 VDAG_JR2_Chr1g05460.1 1.37649616719268 7.09605235266932 6.60911759679688 0.629602 0.4476328334933607 -0.9902331684176072 Three -3.81832130205221 Core
Chr1 1807164 1809135 VDAG_JR2_Chr1g05470.1 5.2280289550261525 6.60286290093496 6.64007666628222 0.5631659999999999 1.1335594987209137 -0.9877542391271692 Two -1.38384818472897 Core
Chr1 1809240 1812203 VDAG_JR2_Chr1g05480.1 5.42451156547932 7.05816604045061 6.44480661432876 0.560243 1.0089925426121775 -0.991375069346888 One -1.05769601999245 Core
Chr1 1814145 1817330 VDAG_JR2_Chr1g05490.1 6.90142900678199 6.42794205077814 6.427503826339789 0.567347 1.0568142147160593 -0.990315607081521 Two -0.418821077862301 Core
Chr1 1817294 1818923 VDAG_JR2_Chr1g05500.1 6.7327425257312585 5.02068788449709 6.64009230033956 0.614487 4.0705313619571735 -0.989477478747887 Two -0.399260501384826 Core
Chr1 1819095 1821809 VDAG_JR2_Chr1g05510.1 5.94735699331741 5.35570268349028 6.60776961533787 0.565217 3.784449320307962 -0.994175963667216 Two 1.48811105939579 Core
Chr1 1821925 1826089 VDAG_JR2_Chr1g05520.1 5.408584029804291 5.354498414249 6.213756098753719 0.561239 5.015504415635896 -0.9919381830097728 Two 2.5181886908087003 Core
Chr1 1828467 1830566 VDAG_JR2_Chr1g05530.1 6.188885900683321 6.713552314258361 6.56511210716921 0.572177 1.4663068540885082 -0.9877626984195808 One -0.73586271674546 Core
Chr1 1830932 1833493 VDAG_JR2_Chr1g05540.1 6.80230357160549 6.247900658358389 6.32777775124304 0.557595 1.5021263263924514 -0.98817456460321 Two -1.33465989541283 Core
Chr1 1834639 1836483 VDAG_JR2_Chr1g05550.1 5.8825939472728095 5.05035614797028 6.4419893016283 0.644252 6.34894329418196 -0.994738417684149 Two 2.675869616609 Core
Chr1 1837347 1838984 VDAG_JR2_Chr1g05560.1 5.61812266821023 4.37806389913444 6.33418057238727 0.5949909999999999 6.1606494375196466 -0.9906104774917828 Two -0.0017149529215734196 Core
Chr1 1839399 1842739 VDAG_JR2_Chr1g05570.1 6.04943137310179 5.578104366597482 6.72193965014055 0.5928140000000001 4.052449568472081 -0.99087021769081 Two 0.589850115457793 Core
Chr1 1843243 1845083 VDAG_JR2_Chr1g05580.1 0.258657750536134 6.04765986781724 6.0396667847399295 0.5570649999999999 2.4152321576532327 -0.993556646912198 Three 0.348811522186498 Core
Chr1 1845062 1846926 VDAG_JR2_Chr1g05590.1 6.74185437707897 5.9892789271770726 6.50145295357183 0.587983 2.407985959963532 -0.992211402823382 Two 0.316401040664781 Core
Chr1 1847805 1849071 VDAG_JR2_Chr1g05600.1 6.76280635747473 7.2230982789335085 6.37004104408275 0.537125 1.0714594303729899 -0.99149268272394 One -2.52210441645796 Core
Chr1 1849439 1855674 VDAG_JR2_Chr1g05610.1 4.89164952862602 5.98057872764575 6.292310957470058 0.55814 5.108905328354966 -0.99128088193655 Two 0.636723741479023 Core
Chr1 1855959 1856939 VDAG_JR2_Chr1g05620.1 6.87657374479303 6.664583273139581 6.13325113502784 0.534694 3.433478866026737 -0.9959082126930192 One -3.92786511681589 Core
Chr1 1857391 1858501 VDAG_JR2_Chr1g05630.1 5.3815695099365914 7.712711702858219 6.1830774516159295 0.5387390000000001 1.939351807348268 -0.9941901274402528 One -0.953182853620854 Core
Chr1 1859275 1861945 VDAG_JR2_Chr1g05640.1 5.447138610912041 6.69132538826077 6.5606534292450585 0.567041 0.6777193152097399 -0.991409663426732 One -1.9446322265088305 Core
Chr1 1864294 1865576 VDAG_JR2_Chr1g05650.1 6.4700572872129705 6.7297517852359805 6.6425769646402895 0.624025 0.0 -0.990524812902664 One -12.633498 
Chr1 1865889 1866797 VDAG_JR2_Chr1g05660.1 6.61607243283014 6.96126106828261 6.57309881687201 0.573789 0.0 -0.9834443014576048 One -16.58387 
Chr1 1868080 1869951 VDAG_JR2_Chr1g05670.1 5.34982492320234 5.45072851469833 6.5096869149927485 0.5831109999999999 8.71550688562067 -0.988733401572438 Two 3.7611507389489103 Core
Chr1 1870946 1871983 VDAG_JR2_Chr1g05680.1 5.443184665600259 6.55132157439196 6.551499901336651 0.542912 6.818223146217216 -0.990755215522692 Two 0.131405581724422 Core
Chr1 1872087 1874449 VDAG_JR2_Chr1g05690.1 7.08821864660626 5.692075914435692 6.26990673929566 0.57155 4.083206357389684 -0.99161639240835 Two 2.52666718432858 Core
Chr1 1875035 1877623 VDAG_JR2_Chr1g05700.1 6.01796577584859 5.75319595561443 6.77602262219029 0.591577 5.4574957177050125 -0.993215091550528 Two 1.26947410133638 Core
Chr1 1877775 1878976 VDAG_JR2_Chr1g05710.1 7.685615917718541 5.7197751190992 6.4352804616415895 0.5670270000000001 4.138213860046509 -0.991249388726377 Two 0.693580484041807 Core
Chr1 1879178 1883254 VDAG_JR2_Chr1g05720.1 5.09392994581795 5.820055136742929 6.36971368055143 0.5814520000000001 4.172038736812011 -0.989923378494257 Two 1.58134877813102 Core
Chr1 1884382 1885676 VDAG_JR2_Chr1g05730.1 6.36200122094342 5.4975296203787005 6.6130499605705895 0.5749609999999999 4.174677641658047 -0.9915877601838 Two -0.100747110951611 Core
Chr1 1887654 1888844 VDAG_JR2_Chr1g05740.1 6.682486640757389 5.51818376193866 6.2927072209565305 0.5831930000000001 1.7073232519282533 -0.992700332779298 Two -1.23414943089319 Core
Chr1 1888822 1890667 VDAG_JR2_Chr1g05750.1 5.27052627747558 5.98873698620932 6.4759875294284415 0.555014 2.8251918389336534 -0.985949419072307 Two -0.123804657838069 Core
Chr1 1890836 1894529 VDAG_JR2_Chr1g05760.1 5.9957403526078785 5.76935333379877 6.4422860410903215 0.5629569999999999 4.568164326552052 -0.990171914027512 Two 1.27115494390532 Core
Chr1 1895058 1897064 VDAG_JR2_Chr1g05770.1 4.6924242621505305 5.30407998047078 6.4714181453132 0.612163 1.0464118767119035 -0.993460733382832 Two -1.57324563880151 Core
Chr1 1897565 1899981 VDAG_JR2_Chr1g05780.1 6.321245984358 5.62922116469549 6.562623819120669 0.605132 3.61323296444587 -0.990115884641818 Two 2.08596919707004 Core
Chr1 1900258 1902699 VDAG_JR2_Chr1g05790.1 6.878212120591072 5.75341502958758 6.3305342466780905 0.563294 3.151799630968513 -0.990029328431936 Two 1.55149922514344 Core
Chr1 1905813 1909492 VDAG_JR2_Chr1g05800.1 5.98780017426676 5.6034680718843495 6.6223004028956405 0.566186 5.319934209502296 -0.9914399404134508 Two 4.46558266926258 Core
Chr1 1910249 1914140 VDAG_JR2_Chr1g05810.1 5.73550179940621 5.21319520882615 6.64343457985534 0.6178359999999999 3.982096356996357 -0.991527773230807 Two 3.17365238575435 Core
Chr1 1915154 1919478 VDAG_JR2_Chr1g05820.1 4.8945515413460186 5.11476950574001 6.33807602903779 0.577706 2.541849694839159 -0.991794400842534 Two 1.6946282947266 Core
Chr1 1920074 1921313 VDAG_JR2_Chr1g05830.1 7.28129306086596 5.117234854320059 6.55539044400954 0.614205 2.005760366176387 -0.991370477016847 Two -0.78226362400589 Core
Chr1 1922442 1923855 VDAG_JR2_Chr1g05840.1 6.0981635289133225 5.18930900097311 6.5197121671007086 0.615004 5.397717984516042 -0.992631776420621 Two -0.202355877971202 Core
Chr1 1923986 1924916 VDAG_JR2_Chr1g05850.1 7.07718988070314 5.740389516113829 5.99647109166793 0.574194 10.590188922537704 -0.993145076455862 Two 0.188746517541027 Core
Chr1 1925026 1926096 VDAG_JR2_Chr1g05860.1 7.178409666857831 5.31061721166741 6.51331347203119 0.6364489999999999 5.3884522872179454 -0.994353436858858 Two 1.76377358674894 Core
Chr1 1926485 1927494 VDAG_JR2_Chr1g05870.1 1.28235442985708 6.764136543872241 6.30602023430984 0.531219 10.918437385871997 -0.9907221864119892 Three 2.00996910621317 Core
Chr1 1928809 1930372 VDAG_JR2_Chr1g05880.1 6.622811463501719 5.6401227828387 6.34300418744779 0.568778 10.436024270758166 -0.991972743007897 Two 3.74011680335689 Core
Chr1 1930464 1931444 VDAG_JR2_Chr1g05890.1 7.290804894162741 5.36998383280874 6.51652062027586 0.591837 3.958245242604228 -0.99339121592435 Two -1.77107010308773 Core
Chr1 1931496 1933367 VDAG_JR2_Chr1g05900.1 4.75862654314375 5.65306489110966 6.48239411169975 0.56868 6.4551009852664745 -0.9880598720219108 Two 0.38078562550749706 Core
Chr1 1934244 1935778 VDAG_JR2_Chr1g05910.1 7.21835922720052 5.91533051038833 6.6613801788763 0.591917 6.0879402245609695 -0.991545858955171 Two 0.8223601982106491 Core
Chr1 1936376 1938207 VDAG_JR2_Chr1g05920.1 4.4669105532027 5.8744174082703315 6.12397096078259 0.554342 3.7197299257371794 -0.9918701277105252 Two -1.34158113729679 Core
Chr1 1938317 1940354 VDAG_JR2_Chr1g05930.1 5.04121697068451 3.67739240143188 6.544968723031403 0.628375 3.3059489431893367 -0.992177467057832 Two -0.364001272219865 Core
Chr1 1941630 1942586 VDAG_JR2_Chr1g05940.1 7.39922156708436 4.50965605052812 6.4959017562743 0.549163 8.962166600443194 -0.9915982580466072 Two 1.20937177639228 Core
Chr1 1944194 1944906 VDAG_JR2_Chr1g05950.1 5.91582844334726 6.603003624633089 6.80960263363016 0.574438 1.0848578153217203 -0.9939615047906591 Two -2.9901841534101803 Core
Chr1 1945022 1947429 VDAG_JR2_Chr1g05960.1 5.624540325192339 4.82178483890337 6.625595854045769 0.6194430000000001 3.912067344363919 -0.992578288652282 Two -0.0095180771878669 Core
Chr1 1947424 1948853 VDAG_JR2_Chr1g05970.1 5.00448419542708 6.0255643357652 6.53156651463747 0.6200140000000001 4.85099851465629 -0.990433509689855 Two 0.821396304639999 Core
Chr1 1949614 1950915 VDAG_JR2_Chr1g05980.1 7.06039051801592 5.55238826436902 6.5240505416414205 0.563413 0.9408893374373928 -0.9913148531224292 Two -2.4620536370600896 Core
Chr1 1952810 1954733 VDAG_JR2_Chr1g05990.1 4.22200294220201 5.14584884627142 6.22421421406302 0.604264 4.985967090364584 -0.990263984246705 Two 2.24861719831524 Core
Chr1 1955066 1958143 VDAG_JR2_Chr1g06000.1 6.16367763614696 5.50728484271998 6.30930945867936 0.585635 4.556591030883177 -0.9907131716526468 Two 3.3626094472462795 Core
Chr1 1958330 1959575 VDAG_JR2_Chr1g06010.1 5.127410597523911 4.62356016784055 6.43060654191928 0.6321289999999999 5.327147246526102 -0.989988196871934 Two 0.0224463551630251 Core
Chr1 1960254 1961462 VDAG_JR2_Chr1g06020.1 0.3775115828149199 5.457364458663 6.757013856372019 0.696192 1.6363940236176993 -0.991419224734952 Three -2.39534183971042 Core
Chr1 1963108 1963437 VDAG_JR2_Chr1g06030.1 1.06916059258897 4.45749541160296 7.37723929173368 0.541033 1.836922562290011 -0.991814474263136 Three -3.40400595526749 Core
Chr1 1966321 1968778 VDAG_JR2_Chr1g06040.1 5.8186302089303 5.5070635956346 5.886450022842281 0.547009 9.126513343240841 -0.991824524546897 Two 2.64802573086453 Core
Chr1 1969557 1970193 VDAG_JR2_Chr1g06050.1 5.57241155099139 5.62160090801687 6.26761519747298 0.602201 5.304102219981567 -0.9913791494847692 Two -3.02185228977126 Core
Chr1 1971075 1972934 VDAG_JR2_Chr1g06060.1 5.56246351339742 5.8362598938148 6.42944453306379 0.615923 3.2273816291147326 -0.9937084651945308 Two 1.19556696430632 Core
Chr1 1973397 1975859 VDAG_JR2_Chr1g06070.1 5.948524668814678 4.16703647277268 6.69310036283669 0.689683 2.9254263447660227 -0.98913218935485 Two -0.5187805770021 Core
Chr1 1977018 1981418 VDAG_JR2_Chr1g06080.1 4.78689366150374 5.35305981858575 6.36981956025897 0.589091 3.4480658667153947 -0.992570014445139 Two 0.956875173978192 Core
Chr1 1982381 1983102 VDAG_JR2_Chr1g06090.1 5.96897759132687 5.79021406163707 6.160219333442769 0.57975 0.1893996070540772 -0.990224077511123 Two -6.010603579088169 Core
Chr1 1983493 1985727 VDAG_JR2_Chr1g06100.1 7.08624697861167 5.00218858905046 6.392681042551152 0.60385 5.6999190614332464 -0.99227370594104 Two 2.32613530427975 Core
Chr1 1986432 1989268 VDAG_JR2_Chr1g06110.1 5.02660858031564 5.44967806845658 6.62098516161391 0.574048 5.414195685746202 -0.988899874519798 Two 2.35941896934215 Core
Chr1 1990998 1992426 VDAG_JR2_Chr1g06120.1 4.03862828551231 5.32801613524506 6.46865170095065 0.5770310000000001 0.4681352624692275 -0.990737078671032 Two -3.82533437012235 Core
Chr1 1994605 1995502 VDAG_JR2_Chr1g06130.1 6.45289275064799 4.70789940720453 6.55701803404833 0.666667 0.9222392799310981 -0.991409496266052 Two -2.99774568912438 Core
Chr1 1996088 1998925 VDAG_JR2_Chr1g06140.1 6.68489728780428 5.531402047714058 6.29979881784129 0.589707 4.658908041446597 -0.991288942326626 Two 1.5567286839878702 Core
Chr1 1999394 2001458 VDAG_JR2_Chr1g06150.1 5.89404393348103 5.803634538852267 6.37711648434895 0.551357 5.190471141685984 -0.9899229273120492 Two -2.37757070499392 Core
Chr1 2003482 2006838 VDAG_JR2_Chr1g06160.1 5.739608475076129 5.42493939301265 6.11677984496295 0.5491659999999999 2.8214139883297635 -0.989569636966498 Two -1.18164668739997 Core
Chr1 2006934 2010358 VDAG_JR2_Chr1g06170.1 6.58927735376682 5.16166167181028 6.62522608820431 0.6115649999999999 5.548850731989878 -0.991457118530754 Two 2.78030234456168 Core
Chr1 2010267 2011112 VDAG_JR2_Chr1g06180.1 0.8915559782776881 3.9343726711011 6.445916039201809 0.7289939999999999 2.6874280045742593 -0.993719438479171 Three -3.9731984444016 Core
Chr1 2011574 2012644 VDAG_JR2_Chr1g06190.1 0.4197272043865461 4.26246274609204 6.532695873828889 0.692523 2.9682290555064736 -0.99228356113715 Three 0.0702311070941398 Core
Chr1 2012763 2014122 VDAG_JR2_Chr1g06200.1 5.982140943675881 5.28819486677293 6.57102824962284 0.6269319999999999 8.94584259447732 -0.991363150444969 Two 2.68333140922556 Core
Chr1 2016405 2017254 VDAG_JR2_Chr1g06210.1 3.99050736750186 5.7501090581098 6.365033678876389 0.603062 4.220427654391013 -0.984748187592156 Two 0.997818573742552 Core
Chr1 2021432 2024382 VDAG_JR2_Chr1g06220.1 6.609335385233541 5.41830034540164 6.39007266722263 0.5671189999999999 4.8434111306041565 -0.991890394380759 Two 1.80309431477122 Core
Chr1 2024685 2026730 VDAG_JR2_Chr1g06230.1 6.838308174674308 5.15790457701801 6.31273699625152 0.590709 0.9843563922760192 -0.992834493270683 Two -1.59260330835311 Core
Chr1 2029157 2031719 VDAG_JR2_Chr1g06240.1 6.28541846894328 5.20640072667128 6.333773983436871 0.5788449999999999 3.495577893879197 -0.991450952487092 Two -1.38002792366687 Core
Chr1 2034072 2035187 VDAG_JR2_Chr1g06250.1 0.404953758013549 5.289859941818 6.893310721283151 0.594619 1.6973733819655927 -0.99255317492719 Three -1.50260829185574 Core
Chr1 2035333 2036531 VDAG_JR2_Chr1g06260.1 5.12013350974044 6.50428405151529 6.528523498998232 0.608514 2.448313495197709 -0.986123655779596 Two -3.83348214241748 Core
Chr1 2036877 2039161 VDAG_JR2_Chr1g06270.1 5.521260842669281 5.58282169034486 6.231920115274099 0.552539 6.9231781506615215 -0.992100212754902 Two 5.37973110461997 Core
Chr1 2039843 2044453 VDAG_JR2_Chr1g06280.1 4.51022993423708 5.3718377630974805 6.1160250923922 0.541215 5.799271480281737 -0.990913810590196 Two 5.2784597107009805 Core
Chr1 2045005 2046478 VDAG_JR2_Chr1g06290.1 6.873657525941451 4.974756135290121 6.47561988899596 0.67074 4.574342664743495 -0.990887252315467 Two 2.27364944358479 Core
Chr1 2046725 2047251 VDAG_JR2_Chr1g06300.1 5.85830633715395 3.8893953521599705 6.59725984262498 0.6140680000000001 2.3360197810185044 -0.99305653452869 Two -1.74841557823676 Core
Chr1 2047449 2048378 VDAG_JR2_Chr1g06310.1 7.3260650926121915 4.20988294061961 6.55963382460538 0.58127 2.0563640156020893 -0.989992826644619 Two -1.95302388622579 Core
Chr1 2048329 2050197 VDAG_JR2_Chr1g06320.1 5.72347738627139 5.349440536348848 6.388432368142119 0.60439 2.809458496143036 -0.995053463388912 Two 0.8535950086327391 Core
Chr1 2051043 2053402 VDAG_JR2_Chr1g06330.1 6.39781563474572 5.540438482777411 6.022466083371168 0.571853 4.982048242506808 -0.990890987176368 Two 3.46943436351489 Core
Chr1 2053656 2057095 VDAG_JR2_Chr1g06340.1 3.7438853870006494 5.15117503294228 6.42635310820583 0.585345 5.081213299638674 -0.990731075271129 Two 0.965318173535945 Core
Chr1 2058888 2061538 VDAG_JR2_Chr1g06350.1 5.90777967347656 4.9557456126093 6.3388734186636695 0.5701890000000001 7.973777425610745 -0.9935695729244 Two 4.85669728591531 Core
Chr1 2061703 2066093 VDAG_JR2_Chr1g06360.1 7.1859361944141 5.66635371781472 6.20337487326789 0.555125 4.865352316718257 -0.99013647495135 Two 4.266748295999379 Core
Chr1 2066767 2067860 VDAG_JR2_Chr1g06370.1 5.64166735161587 5.389461011979718 6.46497567139726 0.561757 7.2090479531171265 -0.993093599198237 Two 1.83616407059438 Core
Chr1 2067940 2070850 VDAG_JR2_Chr1g06380.1 5.4743304977757585 6.11809960550857 6.04860057313468 0.5295529999999999 5.6933163425004025 -0.9923577555362488 Two 0.42256148502396296 Core
Chr1 2071123 2073003 VDAG_JR2_Chr1g06390.1 6.494652907458463 5.59634513109658 6.42626435309953 0.6212770000000001 5.303686375920742 -0.992003390041734 Two 2.4759236374949505 Core
Chr1 2073117 2075804 VDAG_JR2_Chr1g06400.1 6.60004920038833 5.32921726366864 6.286526572146231 0.546334 5.546378998107025 -0.995538537170914 Two 1.7933127095614698 Core
Chr1 2076853 2079571 VDAG_JR2_Chr1g06410.1 5.61438012078774 5.559001035821941 6.039842625775889 0.549301 8.030627575049394 -0.990693483130115 Two 4.35657014480998 Core
Chr1 2080577 2082688 VDAG_JR2_Chr1g06420.1 5.1937952237919705 5.74843497257277 6.34872808385769 0.611558 8.400104512622192 -0.992624242416877 Two 6.70709915147633 Core
Chr1 2082939 2084982 VDAG_JR2_Chr1g06430.1 6.3100878686051605 5.6567684428835 6.48453986667802 0.581008 4.123300694736631 -0.993352955801438 Two 0.522920788585879 Core
Chr1 2085395 2086612 VDAG_JR2_Chr1g06440.1 0.3750530875466209 5.56883347938594 6.47337250937482 0.554643 1.5702080098052544 -0.988234837624647 Three -2.4877159209577098 Core
Chr1 2087937 2089685 VDAG_JR2_Chr1g06450.1 7.248855378990589 5.69731899399458 6.4481354566524685 0.5846680000000001 4.9292076214802565 -0.993686226067798 Two 2.99534028696202 Core
Chr1 2089658 2092111 VDAG_JR2_Chr1g06460.1 5.516561429581901 5.68301041517639 6.16823848327994 0.551162 5.0132186540328885 -0.987989982330583 Two 0.784724462769868 Core
Chr1 2093293 2096258 VDAG_JR2_Chr1g06470.1 6.0406506415373205 5.94445562254665 6.1707890309277404 0.55312 7.582759982607134 -0.9894999897439192 Two 5.486265307180001 Core
Chr1 2096627 2098083 VDAG_JR2_Chr1g06480.1 0.8027814741239441 5.86506224385666 6.51563460223445 0.554258 3.283256845962537 -0.993376424332763 Three -2.66311438065954 Core
Chr1 2099580 2101687 VDAG_JR2_Chr1g06490.1 2.35489199780668 5.25947904160747 6.44314654624627 0.619364 3.748724032781992 -0.9923901623602 Two 2.0293456469356697 Core
Chr1 2101603 2103097 VDAG_JR2_Chr1g06500.1 4.18354810137419 4.7624115782492105 6.76418897456215 0.661981 4.923993296111308 -0.9891843838517808 Two 0.9747562561530592 Core
Chr1 2106768 2107561 VDAG_JR2_Chr1g06510.1 8.02376255070572 7.7446096633105315 6.22706728307564 0.482976 1.3962785137193277 -0.991054566333028 One -3.19611891285981 Core
Chr1 2107481 2110310 VDAG_JR2_Chr1g06520.1 7.09418974278923 8.34123768998825 5.86745313678743 0.511135 3.0481100255759297 -0.988835382640603 One 1.8397568550161896 Core
Chr1 2110467 2111307 VDAG_JR2_Chr1g06530.1 6.887846183814268 8.36172918082888 6.19893150870123 0.553571 2.3627829891822887 -0.99451446091627 One -0.760445978190236 LS
Chr1 2111928 2114147 VDAG_JR2_Chr1g06540.1 6.3066391840934015 7.67193139930205 6.2454416539432405 0.538981 0.3689167291918865 -0.9905888482274908 One -3.4086874524945 LS
Chr1 2114823 2115805 VDAG_JR2_Chr1g06550.1 7.6389192901561 8.27907709860537 6.21993145049129 0.51222 5.5425129726667945 -0.9953375465947072 One 2.7969834119573505 LS
Chr1 2116035 2117243 VDAG_JR2_Chr1g06560.1 7.17261261542575 8.46044400536566 5.89160428892105 0.522351 2.462679523093412 -0.990936916540414 One -1.19352752337774 LS
Chr1 2118049 2119155 VDAG_JR2_Chr1g06570.1 7.83730191786335 7.8869737461674205 6.2546528612606 0.526221 1.3897975061101813 -0.9915934161368058 One -1.88910690761384 LS
Chr1 2119979 2120683 VDAG_JR2_Chr1g06580.1 6.89532943208896 8.00578416347559 6.2291978526163305 0.571023 0.0 -0.992410844988317 One -17.6652 
Chr1 2121810 2122689 VDAG_JR2_Chr1g06590.1 7.145459998738871 8.90541761668208 5.875693062804659 0.511945 0.0 -0.992285034871995 One -18.919115 
Chr1 2122973 2123606 VDAG_JR2_Chr1g06600.1 7.5518945705508305 8.68739692790275 5.512286648098768 0.466035 0.0 -0.994245325274193 One -19.162966 
Chr1 2125484 2126207 VDAG_JR2_Chr1g06610.1 2.4588170166958703 8.60933447376976 5.7535819194339295 0.532503 0.1850869674829061 -0.991392008825021 Three -5.97798727606938 Core
Chr1 2127795 2128411 VDAG_JR2_Chr1g06620.1 6.16936311520751 7.244145172035282 6.57637800259514 0.5438310000000001 1.2975688784188892 -0.989612550831664 One -3.27629485883548 Core
Chr1 2130111 2132154 VDAG_JR2_Chr1g06630.1 5.954533135917901 7.5560039836624595 6.19122366465051 0.538913 1.6780163078601085 -0.992425051439019 One -0.769880776894059 Core
Chr1 2132516 2134693 VDAG_JR2_Chr1g06640.1 6.2916952050676 6.2017916104670086 6.200524892297549 0.588424 3.908307870592009 -0.990527839708664 Two 2.4226475681482498 Core
Chr1 2135798 2137502 VDAG_JR2_Chr1g06650.1 4.62925136670641 5.3796697886771 6.13096861430296 0.567488 8.315750172720206 -0.986847490473303 Two 6.39283298814277 Core
Chr1 2137477 2138577 VDAG_JR2_Chr1g06660.1 1.2103022907239198 3.5955214156510897 6.47142301576653 0.634545 5.906102602394947 -0.990165639895424 Three 0.919101341496656 Core
Chr1 2139028 2141284 VDAG_JR2_Chr1g06670.1 0.84862172386822 5.31769447472479 6.40222614397603 0.590426 5.74352240154966 -0.992686899882399 Three 2.533299087887241 Core
Chr1 2142806 2144568 VDAG_JR2_Chr1g06680.1 7.27992170640033 5.54623544840541 6.3492957914977 0.580023 7.1008729576032135 -0.991534601966183 Two 3.3631225376484304 Core
Chr1 2144927 2147681 VDAG_JR2_Chr1g06690.1 4.65941814075043 5.66649092532129 6.1326914277425715 0.570443 3.9779801957889513 -0.991093759563833 Two 2.69466864895183 Core
Chr1 2147497 2148306 VDAG_JR2_Chr1g06700.1 6.93639500507958 5.726027011977887 6.10326876728826 0.572312 3.5840937515325955 -0.992634597705468 Two -0.404374451360968 Core
Chr1 2148943 2151022 VDAG_JR2_Chr1g06710.1 6.63719847959772 6.635623089821018 5.98875778906204 0.566138 0.7213233825495741 -0.9916032644480072 Two -2.42028384987396 Core
Chr1 2151906 2153013 VDAG_JR2_Chr1g06720.1 5.17990642970446 6.662137676222191 6.04627756434381 0.498645 3.3929936722975182 -0.9860981200886072 Two -0.271920279685308 Core
Chr1 2153194 2155102 VDAG_JR2_Chr1g06730.1 6.15874987426044 5.490984557534361 6.15639520952132 0.581237 2.101676577830117 -0.993412918390293 Two 0.0125557731612705 Core
Chr1 2155167 2158482 VDAG_JR2_Chr1g06740.1 3.67482722743375 5.75877782492934 6.2232639272296115 0.5677220000000001 5.610636035048443 -0.992574802343958 Two 4.62588493063785 Core
Chr1 2158648 2159206 VDAG_JR2_Chr1g06750.1 7.25894633753837 6.22814816392641 6.4718373397876 0.4910390000000001 4.1968867086177415 -0.9944404746580991 Two 0.5707974386396689 Core
Chr1 2160503 2161101 VDAG_JR2_Chr1g06760.1 6.99183784487136 6.3785655427799295 6.88920619871644 0.528428 3.074133435031495 -0.9963545273316008 Two -0.563813280169458 Core
Chr1 2161904 2164473 VDAG_JR2_Chr1g06770.1 6.3022497800479975 5.53652925990987 6.6267062977683695 0.574153 9.023323922819095 -0.990612279114723 Two 3.81504752872069 Core
Chr1 2164822 2165419 VDAG_JR2_Chr1g06780.1 1.14432368009676 5.9074009160558605 5.979496361524639 0.552764 6.954046051446853 -0.9899023556922868 Three 0.342119769872336 Core
Chr1 2165764 2168261 VDAG_JR2_Chr1g06790.1 5.821816621761509 5.7387392233293495 6.08411849380124 0.5891069999999999 3.881039934702876 -0.988607087186886 Two -0.0180237684518113 Core
Chr1 2168468 2170581 VDAG_JR2_Chr1g06800.1 6.46562019407092 5.16459692914926 6.62280348582 0.6209180000000001 6.6257491241242885 -0.991594520434872 Two -1.70662480706429 Core
Chr1 2170314 2171518 VDAG_JR2_Chr1g06810.1 5.0360568364331915 5.69074790452593 7.0067477448584805 0.589701 2.4293502670530445 -0.9885272155560508 Two 0.53219313051891 Core
Chr1 2173694 2174752 VDAG_JR2_Chr1g06820.1 0.423851948775834 5.51094496640606 6.18890324209922 0.626654 0.2487428918037285 -0.987754960918275 Three -5.0106808529876 Core
Chr1 2176138 2177248 VDAG_JR2_Chr1g06830.1 1.97436603843786 7.71499986781684 5.7837689876991 0.52973 0.0 -0.990417696480169 Three 30.955576 
Chr1 2177460 2177900 VDAG_JR2_Chr1g06840.1 0.0 7.263053636247839 6.18953490924328 0.615909 0.0 -0.992366675097572 Three 31.088934 
Chr1 2178568 2183406 VDAG_JR2_Chr1g06850.1 6.70128906623245 5.20579238633306 6.4694567488292885 0.589913 4.547602052330526 -0.990034167728157 Two 4.06609539041016 Core
Chr1 2185484 2186246 VDAG_JR2_Chr1g06860.1 7.71171166724321 5.04496356270066 6.77200907275887 0.564304 1.2099346478028494 -0.98564470702293 Two -2.81251204002973 Core
Chr1 2187791 2192960 VDAG_JR2_Chr1g06870.1 4.4389798584157 5.38395881785222 6.09465060126407 0.5631649999999999 4.602388075961555 -0.9905107544237908 Two 4.21190871119808 Core
Chr1 2193733 2195429 VDAG_JR2_Chr1g06880.1 6.23553812851046 6.3689455691142784 6.50365984113979 0.551297 4.412012628179548 -0.990747686761804 Two 0.532129982005071 Core
Chr1 2195640 2199766 VDAG_JR2_Chr1g06890.1 5.370497218750969 5.79193405938121 6.189552902279 0.560107 5.037572689840392 -0.990330330684294 Two 3.36973400494027 Core
Chr1 2199796 2201180 VDAG_JR2_Chr1g06900.1 7.0788084874144825 5.96194208602612 6.43450015724351 0.6206649999999999 2.179722004272126 -0.988930269831135 Two -0.63099863983545 Core
Chr1 2201945 2205216 VDAG_JR2_Chr1g06910.1 6.376275338910401 5.82063740443588 6.57269999443341 0.579639 4.454588375659698 -0.989380417217618 Two -1.34822560900217 Core
Chr1 2209074 2212175 VDAG_JR2_Chr1g06920.1 5.20045672935654 5.87204729499507 6.34659495771932 0.58723 0.8396253668812336 -0.991941168156905 Two -1.3519850347428 Core
Chr1 2212390 2213447 VDAG_JR2_Chr1g06930.1 1.43783398934324 5.2548190994805495 6.64183717639732 0.625355 3.9758804367266976 -0.9884603850282748 Three 0.30672613292555 Core
Chr1 2215322 2216274 VDAG_JR2_Chr1g06940.1 0.0 4.71345567730517 6.47492177946648 0.622899 2.3912140977958267 -0.991053949997697 Three -0.6868863532725629 Core
Chr1 2217360 2219502 VDAG_JR2_Chr1g06950.1 6.07234387020069 5.47144443360136 6.25161741533491 0.564426 4.576635252396722 -0.992829302815496 Two 2.90327677231528 Core
Chr1 2220464 2222555 VDAG_JR2_Chr1g06960.1 3.98734505662233 5.69128771409702 6.49124847390867 0.5853659999999999 5.298335362307371 -0.987449786059488 Two 1.77162694005951 Core
Chr1 2222817 2224656 VDAG_JR2_Chr1g06970.1 5.952014037404879 5.292284190365058 6.282266686486371 0.5997819999999999 4.122927284363039 -0.9875124345293208 Two 1.2845538410838302 Core
Chr1 2224936 2227807 VDAG_JR2_Chr1g06980.1 6.64991039463001 5.66125922789621 6.3900225450064685 0.5621729999999999 4.0612529000311435 -0.990405055228216 Two 0.965194927818287 Core
Chr1 2228063 2229731 VDAG_JR2_Chr1g06990.1 0.72232733861771 4.904670296411191 6.16665524295758 0.564149 4.112603634688028 -0.988634714116362 Three -0.794279625765869 Core
Chr1 2229886 2230524 VDAG_JR2_Chr1g07000.1 4.1690899018355 6.43861025907322 6.36488593504306 0.561128 4.245598870209309 -0.9921512486952192 Two 0.900882911003132 Core
Chr1 2231289 2232324 VDAG_JR2_Chr1g07010.1 1.26085318437782 5.504627041299 6.41452694427201 0.5603859999999999 4.759281738086554 -0.9783049289006808 Three -1.96630638026926 Core
Chr1 2235244 2238398 VDAG_JR2_Chr1g07020.1 5.36890648463575 5.65685482982984 6.16737295959154 0.554534 6.9738614136834896 -0.990282734307846 Two 4.97469310598857 Core
Chr1 2238740 2240341 VDAG_JR2_Chr1g07030.1 4.63934542718849 4.7471825829169205 6.47925766393672 0.602124 10.51796625936517 -0.9940020387416728 Two 3.59618076703637 Core
Chr1 2240587 2242926 VDAG_JR2_Chr1g07040.1 5.44228044780754 5.46570309492783 6.575055000220081 0.625908 3.5356818390076468 -0.989909798819111 Two 1.9759050070528 Core
Chr1 2243766 2248480 VDAG_JR2_Chr1g07050.1 6.92376391581915 6.13460004893402 6.07433651409232 0.543912 2.1094630705385606 -0.9915055847472192 Two 1.26766109737541 Core
Chr1 2248673 2250650 VDAG_JR2_Chr1g07060.1 1.06801429202776 5.37092189425294 6.51434740562696 0.580678 8.358327382871312 -0.9801301341072768 Three 6.660278795383282 Core
Chr1 2250797 2251674 VDAG_JR2_Chr1g07070.1 0.867083750170226 5.6767086494505286 7.25205130284187 0.624857 2.667704958960232 -0.991987030423454 Three -0.803408314290265 Core
Chr1 2254983 2256638 VDAG_JR2_Chr1g07080.1 5.227227171608191 6.23444771307931 6.20603017350835 0.5413899999999999 1.7066212603388742 -0.9895400277284592 Two -0.972735704140687 Core
Chr1 2257006 2259837 VDAG_JR2_Chr1g07090.1 5.76415645228922 6.235153931678259 6.20117925822433 0.533027 1.1951301518158317 -0.992789690799442 Two -0.82162693012834 Core
Chr1 2260045 2261344 VDAG_JR2_Chr1g07100.1 5.809232617101951 7.523937286004619 5.9868784569619 0.504234 2.1927517360246243 -0.992527460637436 One -0.390439146715842 Core
Chr1 2262167 2263936 VDAG_JR2_Chr1g07110.1 5.52789750985509 6.68007281781787 6.0068605055199 0.527417 0.03939012929247791 -0.99233015184028 One -15.689622 
Chr1 2264072 2265279 VDAG_JR2_Chr1g07120.1 6.9405687720059 6.38326670734064 6.07473090649918 0.4971 4.27370562855807 -0.99450700163924 Two -1.25718661394775 Core
Chr1 2265569 2278028 VDAG_JR2_Chr1g07130.1 6.61990037423021 5.419504225778309 6.0003645223372 0.54579 3.0081532090232765 -0.991134139526653 Two 2.81585873485353 Core
Chr1 2278361 2279443 VDAG_JR2_Chr1g07140.1 7.35423800467991 5.19533440218377 6.476932625717031 0.6524949999999999 2.391161655076135 -0.992782264022684 Two -0.344800872099708 Core
Chr1 2279430 2281909 VDAG_JR2_Chr1g07150.1 5.31358104004088 5.36651391756456 6.63828029424417 0.63332 4.074899457952253 -0.9920730842283708 Two 1.65556035410221 Core
Chr1 2282080 2283703 VDAG_JR2_Chr1g07160.1 5.0273310615692095 5.29772201210811 6.6715371991291 0.569932 2.8338510140990403 -0.991172468384193 Two 0.767706029117583 Core
Chr1 2283429 2285861 VDAG_JR2_Chr1g07170.1 4.933788693743179 4.96546888505854 6.14950408036955 0.653783 1.7317634884135074 -0.99467209535165 Two -1.09960988263686 Core
Chr1 2285955 2287233 VDAG_JR2_Chr1g07180.1 6.27828587119975 5.1423759934597815 6.28901916169649 0.6189359999999999 4.569629422864481 -0.991219346819255 Two -0.6673714156379449 Core
Chr1 2287251 2289472 VDAG_JR2_Chr1g07190.1 6.18793531741056 4.72278479672758 6.19029794041387 0.6091850000000001 5.000106556702159 -0.9911934134751792 Two 3.4160666456502904 Core
Chr1 2290197 2295754 VDAG_JR2_Chr1g07200.1 5.652043867533232 5.04501696397228 6.650950954570839 0.598344 5.383630457617876 -0.992486277987996 Two 1.98647845247073 Core
Chr1 2297034 2299526 VDAG_JR2_Chr1g07210.1 5.07135317237241 5.515453008438691 6.64967264887223 0.578652 2.0592481167490906 -0.991075756113226 Two 0.323481652869467 Core
Chr1 2300796 2304424 VDAG_JR2_Chr1g07220.1 5.86945980073424 5.07476626588842 6.6154551687507 0.6008819999999999 5.8647131032072135 -0.991930211794866 Two 2.18039429178453 Core
Chr1 2304522 2307548 VDAG_JR2_Chr1g07230.1 6.432504352588039 5.27886349436014 6.58449317545666 0.580304 4.712490393107255 -0.987407818704664 Two 2.64092664784585 Core
Chr1 2308666 2312249 VDAG_JR2_Chr1g07240.1 5.477778745657082 6.280723328757 5.91253903887942 0.518839 3.140136601900272 -0.991807501886892 Two 2.2917766318424704 Core
Chr1 2312184 2313516 VDAG_JR2_Chr1g07250.1 6.76764865812819 5.7866310647481916 6.3439067371167885 0.564565 6.766834124638785 -0.991501771790714 Two 4.51175119977071 Core
Chr1 2314459 2318147 VDAG_JR2_Chr1g07260.1 4.23499662528702 5.7145804003997185 6.35989087052009 0.559653 4.69297217431657 -0.989516848977135 Two 0.41264611342239904 Core
Chr1 2318476 2321314 VDAG_JR2_Chr1g07270.1 6.07589475700092 6.34384007150139 6.16095824406712 0.540874 4.716965221143409 -0.9912475259910358 Two 2.52190235190588 Core
Chr1 2321541 2323506 VDAG_JR2_Chr1g07280.1 5.96803748048765 5.04334457197258 6.30916874028108 0.619847 3.0705308811100687 -0.9828284426502892 Two -2.25502725980952 Core
Chr1 2323534 2324704 VDAG_JR2_Chr1g07290.1 6.14551147118745 5.798335438342449 6.41324544211384 0.565812 5.167188288669586 -0.9907953091038468 Two -0.15948791114301 Core
Chr1 2324864 2326215 VDAG_JR2_Chr1g07300.1 6.453692882943809 4.69463902571883 6.43939992286243 0.5995560000000001 5.300342274085282 -0.992192586058917 Two 1.12155094543495 Core
Chr1 2326642 2328236 VDAG_JR2_Chr1g07310.1 5.79772493897424 5.643925842596492 6.293573773639211 0.576537 4.840949375078933 -0.991557552474126 Two 2.77263190783765 Core
Chr1 2328463 2330045 VDAG_JR2_Chr1g07320.1 6.5468582256336925 6.05516710286041 5.767727392961099 0.523388 0.13177661114052802 -0.988758163578086 Two -6.010603579088169 Core
Chr1 2331832 2335275 VDAG_JR2_Chr1g07330.1 4.27535520115481 5.28281864289812 6.337190798201621 0.556782 3.8280926795539236 -0.9906831847318408 Two -0.0217346966210949 Core
Chr1 2337737 2341106 VDAG_JR2_Chr1g07340.1 6.4342123990574 5.87633952259533 6.0262523222069 0.5425939999999999 1.7915197799666305 -0.989515392626629 Two -2.0600740871742 Core
Chr1 2341179 2342268 VDAG_JR2_Chr1g07350.1 5.65637293224416 5.470207365770039 6.3202831520076 0.575758 5.447111645708165 -0.989782168291558 Two 0.9862752504420508 Core
Chr1 2343226 2344995 VDAG_JR2_Chr1g07360.1 1.60524001338887 4.77586068803886 6.57233736562451 0.608819 6.310487183264681 -0.987454746680886 Three 0.7778705429566299 Core
Chr1 2345315 2350735 VDAG_JR2_Chr1g07370.1 6.0559207817441205 5.6771464673733485 5.91899251662813 0.539299 4.1688015849606765 -0.9916686155628208 Two 3.84346881672982 Core
Chr1 2352179 2354749 VDAG_JR2_Chr1g07380.1 6.1642209489410495 5.88394787543108 5.87474552600047 0.5607 4.634872183668211 -0.991303426595236 Two 2.2816792919937203 Core
Chr1 2355040 2358575 VDAG_JR2_Chr1g07390.1 4.19167827133784 5.21089219017206 6.07395365269632 0.58331 7.492396757796903 -0.988110845214587 Two 0.862107530471395 Core
Chr1 2360190 2361341 VDAG_JR2_Chr1g07400.1 6.72582767827913 6.171402202540111 6.53443095380076 0.572546 7.449639016925468 -0.989933956416086 Two -0.527813042259748 Core
Chr1 2361531 2363649 VDAG_JR2_Chr1g07410.1 4.26702940880028 5.07428711917688 6.29706605666555 0.59254 5.366353504154533 -0.992168468739998 Two 3.703775609582221 Core
Chr1 2363748 2367735 VDAG_JR2_Chr1g07420.1 5.835300416244558 5.97769178475742 5.85810197074075 0.518686 4.20559949792342 -0.993740686249039 Two 1.57684350614481 Core
Chr1 2369121 2369604 VDAG_JR2_Chr1g07430.1 1.69785064991848 6.1732508292353785 6.1755053365019705 0.559006 0.3914537731405253 -0.991783394738105 Three -5.3827547535082605 Core
Chr1 2369827 2371999 VDAG_JR2_Chr1g07440.1 5.884013890109661 5.71124006527449 6.205781297581531 0.5635359999999999 4.703422352838398 -0.9926759442305308 Two 0.655154110278419 Core
Chr1 2373101 2374805 VDAG_JR2_Chr1g07450.1 6.31204534129918 6.05539316555403 6.23555591814392 0.515258 8.457022299238362 -0.990699076679798 Two -1.96077709195135 Core
Chr1 2374902 2376302 VDAG_JR2_Chr1g07460.1 6.2741058427624905 5.81866509630053 6.78430205943207 0.541429 0.8945718591884958 -0.99060130199775 Two -2.33873972960777 Core
Chr1 2377899 2381867 VDAG_JR2_Chr1g07470.1 4.5028031290583606 5.5823977057362315 6.31370478739987 0.570817 5.5636751965398 -0.9879264137040952 Two 2.99541622656474 Core
Chr1 2381789 2384355 VDAG_JR2_Chr1g07480.1 5.74960878348108 4.84315814349158 6.23205902275751 0.5923619999999999 1.4820505266963695 -0.9930844881836808 Two -0.43078954065144703 Core
Chr1 2384598 2386719 VDAG_JR2_Chr1g07490.1 6.40909261722997 5.32316060649219 5.9966092844925 0.542669 5.560284415371814 -0.9932170795045908 Two 1.11984624879048 Core
Chr1 2386899 2391881 VDAG_JR2_Chr1g07500.1 3.92049075095968 6.02674272419513 6.016872554180112 0.550984 6.036415631806643 -0.9902416125717808 Two 4.70351227832826 Core
Chr1 2391814 2393234 VDAG_JR2_Chr1g07510.1 0.327049149513792 5.84938403246505 6.283282160863191 0.580282 6.270930446373031 -0.9901494123758108 Three -0.029349373833714 Core
Chr1 2393393 2399193 VDAG_JR2_Chr1g07520.1 5.799479365042631 5.3738350780214 5.87519520772627 0.564655 5.0255563973599156 -0.991557337997133 Two 2.39911549654318 Core
Chr1 2402086 2405431 VDAG_JR2_Chr1g07530.1 4.20933712015759 5.53875566569576 6.4127700448434295 0.579372 4.803663942048554 -0.99099198874834 Two 0.9632620709065648 Core
Chr1 2408959 2411386 VDAG_JR2_Chr1g07540.1 6.330872639077732 5.12974333362508 6.53687335357777 0.6069220000000001 3.603810891590176 -0.989275365357944 Two 0.244161339728841 Core
Chr1 2419662 2421743 VDAG_JR2_Chr1g07550.1 7.01079084598799 4.67634001925678 6.70697143667051 0.575204 4.694528592176411 -0.991841826120906 Two 2.07073158241771 Core
Chr1 2428395 2430307 VDAG_JR2_Chr1g07560.1 6.24114216649899 5.7031493469933485 6.27271934302233 0.5774060000000001 6.79107169564999 -0.992325184643308 Two 0.8511655316557131 Core
Chr1 2431706 2433045 VDAG_JR2_Chr1g07570.1 6.1419632370435 5.43097667569546 6.4453293990640415 0.6131439999999999 6.9126041732717525 -0.9929710212193829 Two -0.661039834205966 Core
Chr1 2433253 2437833 VDAG_JR2_Chr1g07580.1 5.29213005560347 5.38196113311958 5.909040668872152 0.554148 3.6626284154932174 -0.990748746234682 Two 2.10754977601116 Core
Chr1 2438453 2440633 VDAG_JR2_Chr1g07590.1 5.47863059292057 5.49445802570528 6.1163534008781095 0.542661 6.616755636398232 -0.9922960209906422 Two 1.19134103257982 Core
Chr1 2441139 2444221 VDAG_JR2_Chr1g07600.1 6.07870141639492 4.9864326344073895 5.70811822736343 0.547696 3.9335900876367886 -0.9899386865087428 Two 1.82212922320031 Core
Chr1 2445054 2446413 VDAG_JR2_Chr1g07610.1 7.1542174281752 5.6372910634211095 6.18555065856285 0.531273 9.70254009199023 -0.99198659690499 Two 1.10206354589707 Core
Chr1 2446737 2449140 VDAG_JR2_Chr1g07620.1 6.6210613587926614 5.667732536889959 5.72764296134306 0.54432 5.000752945047104 -0.9914759276934608 Two 2.589048903210509 Core
Chr1 2449458 2450271 VDAG_JR2_Chr1g07630.1 5.72783615633506 5.88361219266388 6.3047524316273895 0.558426 4.626267181917384 -0.990115884641818 Two -1.28395408803851 Core
Chr1 2450393 2451505 VDAG_JR2_Chr1g07640.1 1.2014348729605802 4.81476825089795 6.31405614659075 0.566547 5.204518991277896 -0.9945695229198148 Three -2.1163383406897 Core
Chr1 2451531 2452762 VDAG_JR2_Chr1g07650.1 3.33611701193171 4.59807680379025 6.00212368931659 0.597888 4.046404566828112 -0.993817351496566 Two -0.31509362341250896 Core
Chr1 2454143 2458583 VDAG_JR2_Chr1g07660.1 5.82222469097165 5.6082847722026905 6.41449957564489 0.545045 3.8495230161091203 -0.992067520150903 Two 2.9401276455175 Core
Chr1 2460974 2461939 VDAG_JR2_Chr1g07670.1 7.86040000759387 5.5296716033940605 6.43001595890465 0.615544 5.425584581136554 -0.9915779384820268 Two 0.234827495140258 Core
Chr1 2462181 2465189 VDAG_JR2_Chr1g07680.1 2.44475385641535 5.97751821064182 5.74054255092402 0.527261 4.068070622540203 -0.990495761135254 Two 2.86102676444136 Core
Chr1 2465248 2467171 VDAG_JR2_Chr1g07690.1 5.72915671255475 6.18116837404688 5.614978039066219 0.522101 5.07746050063178 -0.990146609113376 Two 2.30456088297986 Core
Chr1 2467287 2472014 VDAG_JR2_Chr1g07700.1 5.46052405229912 5.190788787034768 6.1333251859898485 0.610324 4.244532712408415 -0.991237812346118 Two -0.103879230166836 Core
Chr1 2472992 2474206 VDAG_JR2_Chr1g07710.1 6.72061978032139 5.40962792365377 6.2979407313444815 0.615321 8.189871570376027 -0.9923581628471378 Two 2.9339458992117406 Core
Chr1 2474528 2478057 VDAG_JR2_Chr1g07720.1 5.64506052994681 5.2186972490378 6.51103887375182 0.583451 7.2691770470163135 -0.990421137167269 Two 3.54899482171732 Core
Chr1 2478654 2480260 VDAG_JR2_Chr1g07730.1 6.539395756433097 5.9627962312237575 6.461395070225789 0.520548 5.339335797639492 -0.992369050131954 Two 1.52076601217936 Core
Chr1 2479961 2481628 VDAG_JR2_Chr1g07740.1 5.44951240835724 5.3569628390330895 6.119633568796751 0.532094 7.102410691240468 -0.991144288606677 Two -0.9258667992946048 Core
Chr1 2481763 2483459 VDAG_JR2_Chr1g07750.1 7.600002745831209 5.8108452492261895 6.40923437866516 0.551297 6.087428838972076 -0.99078617994263 Two -0.0259785579320058 Core
Chr1 2483854 2490512 VDAG_JR2_Chr1g07760.1 5.79682935105134 5.32551570233261 6.57353419847199 0.591769 6.763698207052696 -0.992062629261692 Two 3.15555522784616 Core
Chr1 2490722 2494933 VDAG_JR2_Chr1g07770.1 4.52138292365713 5.27035606970219 6.37717643482825 0.597008 4.301426914722208 -0.992344289875652 Two 1.78980228001254 Core
Chr1 2494673 2498495 VDAG_JR2_Chr1g07780.1 2.31337923069833 5.68322184635955 6.18020053065351 0.5764 3.91208001055086 -0.990914476247658 Two 3.14872729147816 Core
Chr1 2499078 2501265 VDAG_JR2_Chr1g07790.1 6.4193188506264605 6.32966936615373 6.15679886208969 0.515775 4.8498695516972985 -0.9875214033764328 Two -0.663692028431663 Core
Chr1 2501240 2502069 VDAG_JR2_Chr1g07800.1 8.33966229142527 5.51984579986384 6.04261308075474 0.5186970000000001 5.876018819020076 -0.990837091835242 Two -0.528521762255229 Core
Chr1 2502313 2503434 VDAG_JR2_Chr1g07810.1 5.23815915036175 6.06483993742689 6.60672632756775 0.565566 8.016230681478897 -0.985231049750825 Two -1.00267581286673 Core
Chr1 2503726 2504419 VDAG_JR2_Chr1g07820.1 3.4470628459431203 4.57021158301065 6.1209576744071 0.580087 6.048920046110536 -0.99277522100317 Two -0.388014345235736 Core
Chr1 2504493 2505805 VDAG_JR2_Chr1g07830.1 5.94452636784062 6.366469285616732 6.3880622873188 0.570122 7.283885485658902 -0.9935965494479252 Two 0.931513523847021 Core
Chr1 2506401 2507440 VDAG_JR2_Chr1g07840.1 6.99133020680108 5.96947551366483 5.843226574828 0.517806 5.539760126954165 -0.9869155309979292 Two -0.284525653507526 Core
Chr1 2507449 2508429 VDAG_JR2_Chr1g07850.1 0.452791005300683 5.36998383280874 6.491504084634711 0.543878 8.278178943818068 -0.993355026446889 Three -0.487422343231899 Core
Chr1 2508568 2510162 VDAG_JR2_Chr1g07860.1 6.854182302141499 6.12012391176952 5.888235677727621 0.5288579999999999 3.1697818479291096 -0.9856286193909608 Two 0.0216428486020151 Core
Chr1 2510780 2515188 VDAG_JR2_Chr1g07870.1 4.3581300258561 5.6119260833468605 5.8770369374701925 0.551724 3.604668778159813 -0.99172879312808 Two 2.8914533381958103 Core
Chr1 2515212 2516708 VDAG_JR2_Chr1g07880.1 5.67226546869131 5.163328106634831 6.49827877165368 0.6129680000000001 4.289683791051656 -0.986550742480434 Two 2.03456202565507 Core
Chr1 2517185 2519003 VDAG_JR2_Chr1g07890.1 7.101572147185428 7.3704448190903 6.23562945300994 0.528053 5.540614083464782 -0.9911067985252108 One 2.71394746608684 Core
Chr1 2519365 2524874 VDAG_JR2_Chr1g07900.1 6.7675769418178 5.663690544763429 6.12459811835127 0.561263 7.596435012083937 -0.990903815253858 Two 3.93432476642526 Core
Chr1 2525746 2528649 VDAG_JR2_Chr1g07910.1 6.48769646820691 5.632068740099619 6.46378666308164 0.544609 5.721324566033808 -0.9904937385277373 Two 3.5817051252106897 Core
Chr1 2530240 2531971 VDAG_JR2_Chr1g07920.1 5.962702894353981 5.66938838350525 6.529722682131621 0.538417 1.2836398006477907 -0.990742032138904 Two -1.40629475708024 Core
Chr1 2532740 2534191 VDAG_JR2_Chr1g07930.1 4.96023685274181 4.49612083406504 6.16135115203642 0.616816 0.7240120441186136 -0.992558180240182 Two -2.82542198281204 Core
Chr1 2540458 2541538 VDAG_JR2_Chr1g07940.1 7.76011077689875 5.93621199794163 7.2276736525519 0.567593 0.3007549085926612 -0.9901094559550642 Two -4.62207554341244 Core
Chr1 2542483 2545853 VDAG_JR2_Chr1g07950.1 5.951812941931387 5.2982812208028 6.9708366839283 0.5818989999999999 3.431668436345802 -0.989826600977442 Two -0.7640316205943559 Core
Chr1 2545866 2548918 VDAG_JR2_Chr1g07960.1 6.28667427292777 4.88064132431497 6.2457198722120575 0.620904 5.006787780767703 -0.989892192498604 Two 1.04233685278937 Core
Chr1 2549093 2551202 VDAG_JR2_Chr1g07970.1 5.40800538666642 5.114710441046371 6.31216990599486 0.590327 5.1714868040231226 -0.9911919942983108 Two -0.6301553675277299 Core
Chr1 2551569 2554614 VDAG_JR2_Chr1g07980.1 5.025156007548191 5.37647215324674 6.38916415559198 0.596059 2.498451067622283 -0.988422197096699 Two 0.153744273275494 Core
Chr1 2554675 2556852 VDAG_JR2_Chr1g07990.1 6.112965914612008 5.418365064127411 6.23776385421389 0.577859 4.06818706413307 -0.9918322387563208 Two 2.40335427459352 Core
Chr1 2558042 2560005 VDAG_JR2_Chr1g08000.1 6.39251539343457 4.90971406595598 6.24006773775665 0.571574 6.617873300207857 -0.9883243606451508 Two 4.88738850579989 Core
Chr1 2560589 2561948 VDAG_JR2_Chr1g08010.1 6.22710051072384 4.99200144490454 6.35085558437413 0.583517 7.3766156255614685 -0.99230765951052 Two 1.21648366340383 Core
Chr1 2562280 2563636 VDAG_JR2_Chr1g08020.1 5.81136845407408 4.86619434651833 6.48081186353904 0.618732 4.634659790538661 -0.9885952367277512 Two -0.346640881356524 Core
Chr1 2563710 2565994 VDAG_JR2_Chr1g08030.1 4.07204201356804 5.33546398697316 6.32643313669618 0.574431 6.272116736907532 -0.990425986474297 Two 1.88721958249203 Core
Chr1 2566210 2568453 VDAG_JR2_Chr1g08040.1 6.89767350587074 5.4987734521858505 5.87619135843012 0.530539 7.006246352976833 -0.9915877601838 Two 1.45175738160999 Core
Chr1 2568911 2571299 VDAG_JR2_Chr1g08050.1 4.48115281807408 4.79577934316349 6.25301022133762 0.610553 1.4168565818715817 -0.9917839517991 Two -1.63211862135393 Core
Chr1 2572028 2573589 VDAG_JR2_Chr1g08060.1 5.46869246040112 5.819774248581389 6.57370816212735 0.62524 5.642147369190444 -0.99187731932379 Two -0.984818104916992 Core
Chr1 2575251 2577082 VDAG_JR2_Chr1g08070.1 3.76862267254121 4.837311596830389 6.36839875223535 0.597488 6.612163111246773 -0.9851357377849592 Two 3.06837948042977 Core
Chr1 2577478 2579276 VDAG_JR2_Chr1g08080.1 5.603645323614511 5.19500022428104 6.27725259755982 0.60901 3.435506400650453 -0.994960305631237 Two -0.956392444735177 Core
Chr1 2579916 2582432 VDAG_JR2_Chr1g08090.1 6.24174368076021 5.680588422464732 6.973912728375501 0.581479 4.815963199590212 -0.988052146695552 Two 0.5542116404900109 Core
Chr1 2583544 2585478 VDAG_JR2_Chr1g08100.1 4.1699819899550095 5.32602163418962 7.57530827205043 0.58273 0.3602648751110693 -0.991451337601592 Two -4.99384752461402 Core
Chr1 2585946 2588444 VDAG_JR2_Chr1g08110.1 5.55888902909649 5.87175931309979 7.1708428335655485 0.564852 2.2144387444852005 -0.991400507031879 Two 0.5179116001379129 Core
Chr1 2590437 2592640 VDAG_JR2_Chr1g08120.1 5.03640420239436 5.424363439801638 7.04381951095089 0.594644 3.041435471210008 -0.992127982344434 Two 1.28407649886791 Core
Chr1 2593119 2597820 VDAG_JR2_Chr1g08130.1 4.8644442707959 5.2989456850326695 6.3978689080512785 0.602425 4.5220608161798745 -0.99086327271206 Two -3.0190094705144603 Core
Chr1 2597620 2599334 VDAG_JR2_Chr1g08140.1 7.16067258456717 5.93119786325951 7.05831414192636 0.568261 1.864880708800524 -0.988598241175066 Two -0.682296423562137 Core
Chr1 2599680 2601377 VDAG_JR2_Chr1g08150.1 2.50692329511527 5.181239470517009 6.634498526863903 0.6205069999999999 6.539170431616899 -0.987594090168068 Three 2.76593308724606 Core
Chr1 2601350 2604987 VDAG_JR2_Chr1g08160.1 6.4968087962333705 4.97668778735294 6.12622458747015 0.585098 3.63325993062852 -0.989610563270072 Two 0.863455849478288 Core
Chr1 2605635 2608044 VDAG_JR2_Chr1g08170.1 0.8072895828151959 4.86687700336818 6.445963954306589 0.607306 5.291395302566716 -0.989049308373412 Three 3.8251472126119 Core
Chr1 2608861 2611410 VDAG_JR2_Chr1g08180.1 5.796296653412441 5.3582554302010585 6.364671877378122 0.608866 2.9435544059974985 -0.993059045421604 Two 1.31155157505379 Core
Chr1 2611797 2614077 VDAG_JR2_Chr1g08190.1 6.22587381846719 5.440225120175589 6.558157828083671 0.581579 7.0914970719945645 -0.9929375679643409 Two -0.6225513832612529 Core
Chr1 2614307 2615124 VDAG_JR2_Chr1g08200.1 0.914169735005006 5.02978412600308 6.19263625399361 0.5544680000000001 10.661867171289304 -0.982705438532147 Three -0.763085217622995 Core
Chr1 2615227 2617144 VDAG_JR2_Chr1g08210.1 5.42728885688489 4.89373943567458 6.30509876421969 0.57903 6.430293775712942 -0.992371332425507 Two 2.81657849201311 Core
Chr1 2618739 2620663 VDAG_JR2_Chr1g08220.1 6.246579281575849 4.94971866732917 6.21849066780441 0.591996 4.299669375523308 -0.9931924137417578 Two 0.647495602346888 Core
Chr1 2622136 2625551 VDAG_JR2_Chr1g08230.1 5.9329871523142685 5.1121718278048895 6.29204853981353 0.5815520000000001 3.811790136873523 -0.990593491722925 Two -1.73749270253542 Core
Chr1 2625813 2627571 VDAG_JR2_Chr1g08240.1 4.82450001443664 5.5233025588574005 7.22692447319937 0.5682590000000001 2.1850763652413168 -0.9809887541729828 Two -5.47611859375322 Core
Chr1 2628254 2631870 VDAG_JR2_Chr1g08250.1 5.39804811516073 5.83063377747052 6.68292065861542 0.559458 1.1734960139120505 -0.992804038464626 Two -1.41361063906403 Core
Chr1 2633434 2638014 VDAG_JR2_Chr1g08260.1 6.615203254579789 4.53223201864651 6.78170454337723 0.620742 5.129088525383732 -0.9889692532129192 Two 3.64358757396108 Core
Chr1 2638203 2639428 VDAG_JR2_Chr1g08270.1 4.43605450086809 4.628492235945701 6.7491524283315805 0.68 5.618227053975298 -0.990254886312077 Two 3.2075690633353595 Core
Chr1 2639438 2642309 VDAG_JR2_Chr1g08280.1 5.41467483327884 5.202883852763719 5.869939258501309 0.577847 2.343042578548688 -0.9912048800280442 Two -0.0763155770855103 Core
Chr1 2644082 2646062 VDAG_JR2_Chr1g08290.1 5.00917704672758 5.18606151252862 6.402592101966231 0.5848479999999999 5.012604348981804 -0.99199374396655 Two 0.8384510397579751 Core
Chr1 2646309 2647856 VDAG_JR2_Chr1g08300.1 6.09305843978724 3.93124761900491 6.096020419854 0.63607 3.129767237121264 -0.9917699404731828 Two -0.0368760914179912 Core
Chr1 2648174 2649175 VDAG_JR2_Chr1g08310.1 6.10556834703259 4.98397701028015 6.147456274289381 0.586414 5.096680020590254 -0.9941719915420292 Two -1.58882076777776 Core
Chr1 2649365 2650045 VDAG_JR2_Chr1g08320.1 6.226053486628 5.28716083865488 6.28459186845126 0.5367649999999999 12.608533641223145 -0.99694990364005 Two 3.22506876335376 Core
Chr1 2650660 2651458 VDAG_JR2_Chr1g08330.1 6.80059313951604 4.80827724881435 7.20232546305418 0.5576439999999999 0.3188501344585953 -0.982539029933778 Two -5.010390196747442 Core
Chr1 2651588 2653192 VDAG_JR2_Chr1g08340.1 1.08833410991843 5.07884238891991 6.85041105267487 0.588529 1.204290029036534 -0.993450164822686 Three -1.7324187281339198 Core
Chr1 2655223 2656357 VDAG_JR2_Chr1g08350.1 0.967796734593908 4.61276422253662 6.3664870097755895 0.666667 1.1596520810043842 -0.991733460674978 Three -2.66330337608339 Core
Chr1 2656744 2661043 VDAG_JR2_Chr1g08360.1 6.69046505018378 6.409343735229241 5.8138071263621125 0.519656 1.7766551066095235 -0.993003028065358 Two 0.686373132592224 Core
Chr1 2661586 2663558 VDAG_JR2_Chr1g08370.1 6.1420862322572605 6.190500929151501 6.8317042160692 0.574037 2.87689841338962 -0.9914501203152092 Two 0.00962286570200881 Core
Chr1 2665856 2669315 VDAG_JR2_Chr1g08380.1 6.25384683461022 4.8683521731696535 6.2543859488109 0.5764670000000001 4.179585332865071 -0.990843913598245 Two 1.36253585314266 Core
Chr1 2669906 2671375 VDAG_JR2_Chr1g08390.1 4.71883503974739 4.768215584878701 6.29063090283701 0.60177 6.447656678952942 -0.9909049656803148 Two -0.4425233285927889 Core
Chr1 2671814 2674130 VDAG_JR2_Chr1g08400.1 0.55387210046632 5.60319044799896 6.3238488610722685 0.579879 2.5423429455608657 -0.992212453880697 Three 1.1377375131598302 Core
Chr1 2673605 2676667 VDAG_JR2_Chr1g08410.1 0.6690205646088361 4.43031422126007 6.40592408846409 0.646636 3.0241635699132123 -0.991291415894476 Three 0.0422491842831797 Core
Chr1 2676961 2678799 VDAG_JR2_Chr1g08420.1 6.079809225045401 5.57855036473971 6.398759105317099 0.594668 5.866566780670081 -0.9917451959838208 Two 1.17139260969246 Core
Chr1 2678886 2681209 VDAG_JR2_Chr1g08430.1 5.95712371669568 5.19534405228041 6.45478597673915 0.616875 5.002453844466023 -0.991656009920932 Two 0.652616326287119 Core
Chr1 2681694 2684529 VDAG_JR2_Chr1g08440.1 3.780801920341741 4.47295547406035 6.27569653814333 0.628219 3.430597208612627 -0.990457396344595 Two -0.31054796397316303 Core
Chr1 2687596 2689004 VDAG_JR2_Chr1g08450.1 7.1275085048327185 5.541889949790338 6.8016773347064605 0.571023 1.0929812703525028 -0.98762852871993 Two -2.03359894876593 Core
Chr1 2691533 2695988 VDAG_JR2_Chr1g08460.1 6.15942952384466 5.840587933761539 6.3111422359882905 0.576431 3.625156963493554 -0.990501198956454 Two 2.9828429241100403 Core
Chr1 2696124 2698942 VDAG_JR2_Chr1g08470.1 5.91867436849756 5.49547170696918 5.925889075937481 0.5663590000000001 3.3815305004548253 -0.994461107705416 Two 2.02736005266441 Core
Chr1 2699146 2700045 VDAG_JR2_Chr1g08480.1 6.62443292380026 5.74112898625141 6.07379179887341 0.558398 3.720236711823213 -0.9925216504296328 Two -0.18664534579140304 Core
Chr1 2700151 2701719 VDAG_JR2_Chr1g08490.1 6.63841242565942 5.92957335458773 6.1698949634542695 0.550383 5.3933063096818366 -0.9913253700867288 Two 2.37530580584615 Core
Chr1 2701889 2705644 VDAG_JR2_Chr1g08500.1 5.0377917661904 5.48547147942711 6.30909946751477 0.5733689999999999 5.819636819866773 -0.9901584342700028 Two 4.0830143909062 Core
Chr1 2705606 2707494 VDAG_JR2_Chr1g08510.1 0.4675357164206421 4.98206483728619 6.307280843542991 0.604873 8.422304974896607 -0.9903843716852008 Three 2.34669659268482 Core
Chr1 2707708 2710316 VDAG_JR2_Chr1g08520.1 4.35995070245459 4.59097979460797 6.011019870654089 0.599693 2.5755397569337712 -0.990706595523824 Two 0.10104346613259 Core
Chr1 2710230 2711351 VDAG_JR2_Chr1g08530.1 5.3676858172907504 4.58314594861443 6.52363720559433 0.601249 4.98933628234906 -0.9911744627643192 Two 2.46995942517906 Core
Chr1 2711483 2712854 VDAG_JR2_Chr1g08540.1 7.487163350662509 5.0904065158427185 6.64731999106478 0.644055 3.8047213078660302 -0.9943843450190292 Two -2.8206420225919504 Core
Chr1 2713308 2713844 VDAG_JR2_Chr1g08550.1 1.59563141613653 4.17066086329725 6.3608538343728105 0.712687 0.8778899143279568 -0.988140916131684 Three -4.6630758536878805 Core
Chr1 2713964 2716510 VDAG_JR2_Chr1g08560.1 6.78679657129627 5.1340215869531605 6.62981209677354 0.5915159999999999 5.608033962582071 -0.989057486932413 Two 4.24823766206554 Core
Chr1 2716696 2718239 VDAG_JR2_Chr1g08570.1 7.33450483902103 4.77341749309108 6.56655296655532 0.618276 5.121755677060478 -0.9876189324582378 Two 0.153734910611647 Core
Chr1 2719851 2720672 VDAG_JR2_Chr1g08580.1 7.247452893449321 5.13193026664914 6.4275324259513305 0.602923 0.08625541232372741 -0.9887178698476192 Two -6.88501115271346 Core
Chr1 2721186 2722747 VDAG_JR2_Chr1g08590.1 5.275315065088192 4.74461418216227 6.22879486710344 0.623959 2.803331232560233 -0.9914652604190648 Two -0.429262495627015 Core
Chr1 2724015 2725928 VDAG_JR2_Chr1g08600.1 6.61032177225127 5.970334401748611 6.02260803080137 0.550967 0.3344188227326844 -0.990456227329129 Two -3.5446791534475897 Core
Chr1 2726008 2728204 VDAG_JR2_Chr1g08610.1 5.345260169886389 5.07741433932938 6.33793408736544 0.620674 3.1942031827914628 -0.9901831416397928 Two 1.4987635645166 Core
Chr1 2728405 2731555 VDAG_JR2_Chr1g08620.1 6.0249957699652805 5.086236412583831 6.359403051684179 0.60254 3.7925438262636177 -0.9937112132650292 Two 0.793555896533558 Core
Chr1 2732083 2736362 VDAG_JR2_Chr1g08630.1 5.26326735882818 5.11271892975021 6.41306085664711 0.568357 0.933350803689668 -0.988691256915373 Two -3.226546284043 Core
Chr1 2736477 2737135 VDAG_JR2_Chr1g08640.1 4.91181731537184 5.4116470782833215 7.51435012781263 0.5911850000000001 0.8761727872116709 -0.991973859461082 Two -3.7967703581493 Core
Chr1 2737583 2739299 VDAG_JR2_Chr1g08650.1 6.18584955576147 5.78674939111152 6.45667181279683 0.564685 0.5191987955044715 -0.982799259246392 Two -1.96981769738495 Core
Chr1 2737604 2739367 VDAG_JR2_Chr1g08660.1 6.14740931812369 5.73150475788319 6.44010906436024 0.560976 1.7796491130547631 -0.9832853076446892 Two -8.961918 
Chr1 2739345 2740690 VDAG_JR2_Chr1g08670.1 5.89632183528829 5.3260011930844415 6.76707676700989 0.618587 4.631567883510703 -0.9931425700758432 Two -0.506265282354677 Core
Chr1 2740915 2742865 VDAG_JR2_Chr1g08680.1 6.2451989342402685 5.67173621614638 6.62885457058131 0.5682050000000001 3.6283686173861187 -0.992162024906755 Two 0.7996605929313929 Core
Chr1 2743372 2747158 VDAG_JR2_Chr1g08690.1 5.791740708006119 5.20018154477145 6.372779457775153 0.585314 5.133902756299867 -0.991373994984402 Two 4.3320375930276205 Core
Chr1 2747318 2749962 VDAG_JR2_Chr1g08700.1 5.75180910953712 5.7704642439116505 6.17370567086166 0.566188 1.6031755836605457 -0.990185710173044 Two -0.26562981456886103 Core
Chr1 2750522 2751976 VDAG_JR2_Chr1g08710.1 6.229809527614268 5.38099942312615 6.6305749415716 0.593535 6.3467972284411465 -0.9922761840093228 Two -0.9006309123831421 Core
Chr1 2753408 2754787 VDAG_JR2_Chr1g08720.1 0.6078818698223989 5.12720792215705 6.364018765668969 0.619289 3.832478079122428 -0.989178190485875 Three 1.48818710101914 Core
Chr1 2755330 2756923 VDAG_JR2_Chr1g08730.1 5.23815915036175 5.949272582802711 6.76163485102367 0.552417 2.7582748041157705 -0.989088625639485 Two 0.532943090789776 Core
Chr1 2757780 2765249 VDAG_JR2_Chr1g08740.1 5.95870803547468 5.58974538168291 6.492482699149059 0.577453 5.618065964856418 -0.992033372733197 Two 5.25152614466308 Core
Chr1 2763091 2764910 VDAG_JR2_Chr1g08750.1 6.24572965718296 5.25745334677242 6.7700351832370975 0.585487 0.0 -0.993539418920484 Two 4.668621371177402 Core
Chr1 2766186 2768227 VDAG_JR2_Chr1g08760.1 6.46969544044874 5.23190109351512 6.64379058512331 0.596276 3.187847829426296 -0.9930118192769368 Two 1.30861183360216 Core
Chr1 2768407 2773673 VDAG_JR2_Chr1g08770.1 6.04686147220672 5.362714907287129 6.305175023716072 0.5681729999999999 2.328131336253294 -0.989966249877883 Two -0.11554631635571197 Core
Chr1 2773672 2777823 VDAG_JR2_Chr1g08780.1 5.25425323107625 5.19440198403525 6.26152213510497 0.5841970000000001 5.1743075817207 -0.991737600459591 Two 2.67978621482378 Core
Chr1 2779607 2781116 VDAG_JR2_Chr1g08790.1 6.51958860874105 5.74579521421615 6.481226647264871 0.578529 10.292508866375586 -0.992306633996996 Two 1.42586701116435 Core
Chr1 2781313 2782680 VDAG_JR2_Chr1g08800.1 6.09590455887091 5.482554714324862 6.2207214770426 0.542794 5.988673235312984 -0.991399706031144 Two 1.8926430129669896 Core
Chr1 2782723 2786900 VDAG_JR2_Chr1g08810.1 6.555729337806281 5.35531819691376 6.0755096831263 0.552071 4.727381458182088 -0.99077576598414 Two 3.08599201959202 Core
Chr1 2788220 2792340 VDAG_JR2_Chr1g08820.1 5.50102527217212 5.499112433792808 6.21284284607 0.5582520000000001 2.6428759798776507 -0.992139117961825 Two 1.53636993018983 Core
Chr1 2790580 2792149 VDAG_JR2_Chr1g08830.1 0.546524766758822 5.24433643985994 6.159807700206269 0.5748880000000001 0.0 -0.9912675624293 Three 31.758318 
Chr1 2793090 2795265 VDAG_JR2_Chr1g08840.1 6.51101512447968 4.6481137122957685 6.69588704617157 0.621149 4.603214940062808 -0.988182808289288 Two 1.96593222065004 Core
Chr1 2795314 2796727 VDAG_JR2_Chr1g08850.1 0.821397056813305 4.835546590077629 6.634545560486409 0.643312 4.469561873043559 -0.989129914781082 Three 1.23938400923572 Core
Chr1 2799985 2802478 VDAG_JR2_Chr1g08860.1 4.1780614733408905 5.2578385720700185 6.48726134231197 0.558363 4.019182407883745 -0.9923405016453272 Two -2.16870467126818 Core
Chr1 2803232 2807316 VDAG_JR2_Chr1g08870.1 4.78351032731644 5.35653659971162 6.3284522281016695 0.575171 0.2565354059551013 -0.9882762490515072 Two -1.6251249217118502 Core
Chr1 2805824 2812870 VDAG_JR2_Chr1g08880.1 4.06986807412102 5.35654775586696 6.50901566192588 0.576781 2.433000968836593 -0.9898919282469448 Two -3.9755664 
Chr1 2814564 2818067 VDAG_JR2_Chr1g08890.1 6.62464093859959 5.4248616138107 6.24209615532122 0.548958 3.218056188513424 -0.991099821316266 Two 2.1672504480903103 Core
Chr1 2818600 2822814 VDAG_JR2_Chr1g08900.1 6.53382707720939 5.51142224498009 6.24704507898811 0.561699 8.157030242053363 -0.99036731895848 Two 5.67653466457681 Core
Chr1 2822957 2824772 VDAG_JR2_Chr1g08910.1 5.5294730523673 5.25542802384603 6.45963108279225 0.560882 9.753440848019359 -0.988830692281888 Two 5.45174371013343 Core
Chr1 2825380 2826804 VDAG_JR2_Chr1g08920.1 6.697116778097709 5.03351600959116 6.3697852054742405 0.544944 8.651894171240478 -0.9909214513165392 Two 4.617357604374 Core
Chr1 2827061 2831187 VDAG_JR2_Chr1g08930.1 6.1311850187128485 5.32826544629437 5.78108929184211 0.5273869999999999 6.218004350135247 -0.992388331637362 Two 3.12193285500757 Core
Chr1 2831659 2834054 VDAG_JR2_Chr1g08940.1 6.40219227508704 5.23956804626528 6.297745488156838 0.57453 5.918268043588423 -0.992863230359035 Two 2.65425402842139 Core
Chr1 2834023 2835092 VDAG_JR2_Chr1g08950.1 6.848507515494161 6.01385731008775 6.43268312370538 0.57811 3.8950798520736223 -0.990918901347605 Two -2.42379650876584 Core
Chr1 2835319 2838489 VDAG_JR2_Chr1g08960.1 7.14850113185601 5.26986851107014 6.061904052773322 0.5583600000000001 4.281889988214202 -0.9880290140909508 Two 1.3329924606275 Core
Chr1 2840162 2843030 VDAG_JR2_Chr1g08970.1 7.43747079019367 5.25716206073721 6.06347122237599 0.56311 5.539239111823019 -0.991649234822636 Two 1.50147592482962 Core
Chr1 2844716 2847862 VDAG_JR2_Chr1g08980.1 6.20131896988464 5.75867552326064 7.08631765902855 0.5727909999999999 1.3605675465467733 -0.986491091995766 Two -4.708576833568348 Core
Chr1 2848799 2849910 VDAG_JR2_Chr1g08990.1 6.8060363887364685 5.08470616157397 6.742190272067901 0.5625560000000001 3.1671689638353078 -0.993086962249328 Two -2.71812124379184 Core
Chr1 2849999 2851801 VDAG_JR2_Chr1g09000.1 7.19146735821324 4.49855274077108 6.46789271209267 0.584906 4.5865549581447915 -0.989258234721905 Two -0.15043228886999302 Core
Chr1 2852256 2854172 VDAG_JR2_Chr1g09010.1 7.439183738094702 5.63261505183057 6.91716352162947 0.56524 1.4292183557260976 -0.992557016814438 Two -1.90657903257686 Core
Chr1 2855615 2858424 VDAG_JR2_Chr1g09020.1 7.068853986866231 5.2879946714100585 6.4872862613725975 0.578854 5.467122880869897 -0.991196858144343 Two 7.861706 
Chr1 2865193 2866672 VDAG_JR2_Chr1g09030.1 6.1717222121384 5.195846618905611 6.986541953705361 0.5780930000000001 2.024096794048116 -0.993024829083662 Two -0.724845039107225 Core
Chr1 2866769 2869583 VDAG_JR2_Chr1g09040.1 6.52208313316566 5.904155593377169 6.113103607102281 0.5440649999999999 4.508010915323005 -0.9906214367516728 Two 0.374490088870768 Core
Chr1 2869720 2870758 VDAG_JR2_Chr1g09050.1 5.96030062841938 6.15512782012284 6.18588267354575 0.56262 5.679182745351057 -0.994301735698076 Two 1.16504144676889 Core
Chr1 2870786 2873540 VDAG_JR2_Chr1g09060.1 7.433508856970072 5.699156537793058 5.771471522700431 0.5134350000000001 3.2544143443990565 -0.990032735368848 Two 1.83450542355654 Core
Chr1 2873968 2875495 VDAG_JR2_Chr1g09070.1 5.91058556031347 5.925654790701151 6.12201259408339 0.559921 7.278327155843692 -0.99018941790462 Two 1.5366781234920202 Core
Chr1 2875497 2876701 VDAG_JR2_Chr1g09080.1 5.993660997053901 5.68502033241582 6.4908961442640685 0.54485 5.382664999850575 -0.989087460453804 Two 3.00721220667773 Core
Chr1 2876964 2879185 VDAG_JR2_Chr1g09090.1 6.26319937465035 5.63849970719187 6.39506095503804 0.550653 3.6862774470203865 -0.990940660712534 Two 0.0695126923575999 Core
Chr1 2879713 2881644 VDAG_JR2_Chr1g09100.1 7.34575221486858 5.98492080929254 5.919686966187731 0.524081 6.011536219767533 -0.990261099845664 Two 0.810289603420818 Core
Chr1 2881873 2883340 VDAG_JR2_Chr1g09110.1 6.88551900254619 6.05358946093434 6.21884831379992 0.501023 6.16934421621041 -0.990850252601179 Two -0.392899531175998 Core
Chr1 2883823 2888101 VDAG_JR2_Chr1g09120.1 6.97435304267889 4.83303884682973 6.17197631265004 0.5603090000000001 6.67142385620963 -0.991126904580275 Two 2.2229551109559504 Core
Chr1 2889580 2890943 VDAG_JR2_Chr1g09130.1 7.495559437974969 6.0540323698498 6.16764608686483 0.526779 4.374656541083762 -0.9935237282797008 Two -0.779337925267282 Core
Chr1 2891241 2891986 VDAG_JR2_Chr1g09140.1 8.78423877872414 6.5587182419779895 5.91759477421281 0.496644 6.803226748042794 -0.996046054281806 Two -2.23780609275848 Core
Chr1 2891901 2893438 VDAG_JR2_Chr1g09150.1 6.317420946456831 6.428393200062691 6.14377547742612 0.539362 1.7097031798123687 -0.988588297340975 Two -0.760894120499229 Core
Chr1 2895154 2896341 VDAG_JR2_Chr1g09160.1 7.40108166819967 5.56982593991495 5.915373423900441 0.5240100000000001 1.9798969467380927 -0.98870010026306 Two -1.03268174071514 Core
Chr1 2896606 2898859 VDAG_JR2_Chr1g09170.1 7.0894900821669005 6.088349883185249 6.44112901238387 0.548158 5.664050720582777 -0.988709986780775 Two 2.28385004869162 Core
Chr1 2899789 2902040 VDAG_JR2_Chr1g09180.1 7.4109119360462685 5.3578709926704695 6.207012860314809 0.550866 5.137002973613892 -0.991418888956206 Two 1.72958925909099 Core
Chr1 2902448 2906838 VDAG_JR2_Chr1g09190.1 7.67388873757049 5.3991089993638495 5.829721307647341 0.526879 6.296948121411967 -0.994221507464779 Two 3.92329023510726 Core
Chr1 2906723 2907661 VDAG_JR2_Chr1g09200.1 7.95142491346872 6.0982711829038605 6.1122873919366905 0.508529 6.815673058842852 -0.99101630527619 Two -0.342003101691253 Core
Chr1 2907707 2909194 VDAG_JR2_Chr1g09210.1 6.80476412076777 5.87850559028896 6.46333858520149 0.523201 7.1318105537654235 -0.981179975980472 Two -1.32862839810426 Core
Chr1 2909199 2911693 VDAG_JR2_Chr1g09220.1 7.49814451993703 5.78377473376534 5.92048518254043 0.523256 5.502947087838062 -0.987791333663036 Two -0.898464208642678 Core
Chr1 2912444 2915505 VDAG_JR2_Chr1g09230.1 7.66422384336501 5.95459691730737 5.9534745342118 0.517478 5.766535427916473 -0.99262760407781 Two 0.19499110413136606 Core
Chr1 2915867 2919761 VDAG_JR2_Chr1g09240.1 8.20431972724334 5.979729233159031 6.186245599952952 0.525167 4.531558275791103 -0.991053949997697 Two 1.89240992029715 Core
Chr1 3094772 3096402 VDAG_JR2_Chr1g09250.1 8.471662669276709 6.52242232457999 5.865791434056409 0.498159 6.881434050084229 -0.991406109862008 Two 1.25113772217212 Core
Chr1 3096551 3098019 VDAG_JR2_Chr1g09260.1 8.09258993709732 6.28309105514086 5.890238873558661 0.495913 5.656883906491308 -0.9893886493781808 Two -1.41113784307428 Core
Chr1 3098185 3099711 VDAG_JR2_Chr1g09270.1 6.6570276988320805 5.98475889437137 6.1385514055714205 0.539319 11.63986913616504 -0.993716304029958 Two 1.94370000354597 Core
Chr1 3100119 3101162 VDAG_JR2_Chr1g09280.1 0.429124150849531 6.11916911074209 6.34382786225587 0.529243 4.00436783340088 -0.992488955588832 Three 1.24796882925299 Core
Chr1 3101532 3102384 VDAG_JR2_Chr1g09290.1 6.9832920096632005 5.5089891014722685 6.215612813956572 0.529343 5.401137803313569 -0.985636299684675 Two 2.33492178836107 Core
Chr1 3102432 3103982 VDAG_JR2_Chr1g09300.1 7.296273348963232 6.11266002626953 5.9245740913750895 0.507097 4.519376322537863 -0.9882055013391088 Two 1.45879943121228 Core
Chr1 3104047 3104794 VDAG_JR2_Chr1g09310.1 6.23816220379295 6.233003418201281 6.509558985356232 0.548862 6.184767367599847 -0.993613243200471 Two 0.199071878788374 Core
Chr1 3105556 3106837 VDAG_JR2_Chr1g09320.1 6.87983517070495 5.94013443191597 6.49136125828193 0.52381 6.76446561369388 -0.9921945975112 Two 1.10322340738394 Core
Chr1 3106764 3108087 VDAG_JR2_Chr1g09330.1 6.50541505446327 6.466666972001481 6.0203971166844905 0.493575 7.402301932549594 -0.9862599433736968 Two 0.789130299815529 Core
Chr1 3108446 3111956 VDAG_JR2_Chr1g09340.1 6.5411642503030505 5.774480960049571 6.11507735684999 0.516239 5.818092252833876 -0.992357689387648 Two 3.0700455513517304 Core
Chr1 3112128 3113572 VDAG_JR2_Chr1g09350.1 7.81020421716521 6.31122713850477 6.16209550963996 0.5180060000000001 6.239427020088482 -0.990649756370852 Two 0.588537753790291 Core
Chr1 3113935 3115219 VDAG_JR2_Chr1g09360.1 7.88758268697217 6.3144107117173895 6.13072603946107 0.510903 3.3174357836991977 -0.989900588501742 One -0.6945988178259929 Core
Chr1 3115122 3115716 VDAG_JR2_Chr1g09370.1 1.1483081592783702 4.93826966127472 6.00134347312768 0.5 5.724879862504324 -0.987556937366761 Three 35.556953 
Chr1 3115747 3116522 VDAG_JR2_Chr1g09380.1 5.293853106455179 5.32576737459366 6.221789236138071 0.5212899999999999 5.760978595790927 -0.9945831161359748 Two -1.18656591647401 Core
Chr1 3116707 3117645 VDAG_JR2_Chr1g09390.1 8.279359120700072 5.7565802995859405 6.3269562865011295 0.5 5.8006998466991755 -0.994914966897603 Two 1.16506108652726 Core
Chr1 3117988 3124046 VDAG_JR2_Chr1g09400.1 5.671861621003691 5.86264215894521 5.967973514401 0.530868 5.478511541131439 -0.9900827744296968 Two 1.5310045193127295 Core
Chr1 3124606 3126977 VDAG_JR2_Chr1g09410.1 6.80459616107676 5.682322607963131 6.08258389121085 0.527626 8.998470141863868 -0.989473174449076 Two 3.24822128873396 Core
Chr1 3127755 3130022 VDAG_JR2_Chr1g09420.1 6.67982231885689 5.459019461360482 6.1596617579820885 0.536392 9.327858070011757 -0.990674623457639 Two 2.27337105629463 Core
Chr1 3130253 3135609 VDAG_JR2_Chr1g09430.1 6.38607971896008 6.03036107314643 5.83704313019353 0.500934 4.9162736937033085 -0.990522580199194 Two 0.592260433048874 Core
Chr1 3135693 3137473 VDAG_JR2_Chr1g09440.1 7.83761679426957 5.99966441534159 6.06226872312946 0.512921 4.548699738972061 -0.9916122145072808 Two 0.184877117183883 Core
Chr1 3137529 3138139 VDAG_JR2_Chr1g09450.1 1.12738823259973 6.446936999423491 6.3575733765310725 0.5065569999999999 7.7198634893479 -0.98796632933411 Three -2.02846212920113 Core
Chr1 3138472 3140218 VDAG_JR2_Chr1g09460.1 6.706923447010161 6.36507681492177 5.98218354774565 0.5126 5.200065668026669 -0.9866549757184307 Two -1.94883861491704 Core
Chr1 3139919 3146638 VDAG_JR2_Chr1g09470.1 5.6200608041966 6.06315814870229 5.84884620658101 0.519125 2.9678319720305666 -0.990868680835398 Two 0.4194774766128061 Core
Chr1 3147347 3148462 VDAG_JR2_Chr1g09480.1 6.49883845324496 6.10061589214352 5.8397105229482005 0.548879 5.044976239941367 -0.98953895365572 Two 1.50129710005103 Core
Chr1 3148614 3149799 VDAG_JR2_Chr1g09490.1 0.686889499461301 5.94759840433338 6.43516108500135 0.52827 6.991272302602526 -0.9861907228905072 Three -0.918299574918859 Core
Chr1 3151256 3153389 VDAG_JR2_Chr1g09500.1 6.98514067273515 5.44714051124143 5.94026920207713 0.5321140000000001 6.443040500282124 -0.9916276288432628 Two 0.369026236175493 Core
Chr1 3153608 3156399 VDAG_JR2_Chr1g09510.1 5.45450329562801 5.51742102738561 6.12068726318691 0.5524899999999999 5.496298065118903 -0.9908217049867992 Two 1.40358065197575 Core
Chr1 3157289 3159009 VDAG_JR2_Chr1g09520.1 6.9257302519716 5.32328838594091 6.56735834246044 0.555233 4.607436563891612 -0.992021942576476 Two -0.7738331356700401 Core
Chr1 3159067 3161075 VDAG_JR2_Chr1g09530.1 6.34112457609524 5.31384863428101 6.29001680630804 0.543327 3.780004553010391 -0.986696365393196 Two -0.331153388391647 Core
Chr1 3160885 3164355 VDAG_JR2_Chr1g09540.1 6.85220971281891 5.64785101606988 6.1129634485206905 0.542363 5.830298881385058 -0.991484559840442 Two 3.98009484189884 Core
Chr1 3164599 3167109 VDAG_JR2_Chr1g09550.1 5.578437676520232 5.585647086063942 6.56677203606846 0.5553779999999999 5.6051732359586035 -0.985308984649592 Two 3.25973717560969 Core
Chr1 3169201 3171124 VDAG_JR2_Chr1g09560.1 6.43132050564844 5.98790602760947 6.75282952700804 0.579303 5.063985585445072 -0.990575720166624 Two 1.43266152595511 Core
Chr1 3172057 3175212 VDAG_JR2_Chr1g09570.1 6.212929696207651 5.074015504990871 6.440129303304219 0.5990489999999999 3.604434309467337 -0.991992421398634 Two 0.0453865545372586 Core
Chr1 3176117 3179908 VDAG_JR2_Chr1g09580.1 5.81206709305355 5.71630647492393 6.19551169243227 0.54814 3.0566558676927182 -0.9906400587222672 Two 2.17975587504738 Core
Chr1 3180310 3183492 VDAG_JR2_Chr1g09590.1 4.2776040811746014 5.1976405062043085 6.60260795369455 0.584538 7.516877235172247 -0.992832251510274 Two 2.65452052717428 Core
Chr1 3183700 3187173 VDAG_JR2_Chr1g09600.1 5.5476712858507 5.6322553560843005 6.35673095562153 0.543334 2.63668165398118 -0.99133271766065 Two 1.67898061794237 Core
Chr1 3186618 3190913 VDAG_JR2_Chr1g09610.1 4.57274149489501 4.68356735803252 6.3096816432894025 0.603492 2.945567480283912 -0.991672892991977 Two 1.32990056597964 Core
Chr1 3191220 3192706 VDAG_JR2_Chr1g09620.1 6.55649238869475 5.192495512020611 6.7261230230969415 0.640646 3.5911810833043307 -0.992607316799145 Two -0.489804263017319 Core
Chr1 3192731 3194818 VDAG_JR2_Chr1g09630.1 5.903580389163362 5.06471442420239 6.33844695572755 0.645424 2.0554526803854127 -0.99172807457607 Two -0.00894382393176052 Core
Chr1 3195100 3197159 VDAG_JR2_Chr1g09640.1 6.19914106224893 5.70816440610096 6.251263590645079 0.549296 2.15955937211925 -0.99245766244876 Two -0.795534100581557 Core
Chr1 3198422 3200750 VDAG_JR2_Chr1g09650.1 7.82836178913388 5.724192912723429 6.79291957274987 0.593643 3.456015931156569 -0.9922334774037092 Two 0.8857280438770729 Core
Chr1 3203469 3207140 VDAG_JR2_Chr1g09660.1 5.41722688752598 5.02445890497324 6.350381255832889 0.5794060000000001 4.009665546418161 -0.989872343765555 Two 3.1153660011928905 Core
Chr1 3210298 3212308 VDAG_JR2_Chr1g09670.1 5.42234770459216 5.975155497508579 6.41953604465824 0.533333 2.2767619618687283 -0.9910372127785908 Two 0.305523155794074 Core
Chr1 3212734 3215354 VDAG_JR2_Chr1g09680.1 5.77565785274951 5.121426563046031 6.22124114337693 0.5629770000000001 2.0884708704908537 -0.991522064591707 Two 0.52471963639455 Core
Chr1 3214946 3216303 VDAG_JR2_Chr1g09690.1 5.674021710335291 5.51885369096591 6.2673546288989606 0.548268 2.695888209140989 -0.994339803956828 Two 0.462405577694474 Core
Chr1 3216554 3217882 VDAG_JR2_Chr1g09700.1 4.57616296599828 5.42401819735302 6.278210923616119 0.582078 6.613159623780472 -0.98817456460321 Two 1.88661826621645 Core
Chr1 3218250 3219002 VDAG_JR2_Chr1g09710.1 4.67264369761345 5.27966401149299 5.88478623093686 0.62367 4.050589433333183 -0.9894693325078308 Two -2.1234586346428097 Core
Chr1 3218997 3220237 VDAG_JR2_Chr1g09720.1 6.9773054877872 5.56981577051067 6.21524838436343 0.5564520000000001 4.823436187469711 -0.9924575748231792 Two -0.745217454293652 Core
Chr1 3220401 3224734 VDAG_JR2_Chr1g09730.1 6.361382833109912 4.90013443000599 6.105610477160879 0.57189 3.7845768521468255 -0.99199334724205 Two 2.13462371582412 Core
Chr1 3226648 3229305 VDAG_JR2_Chr1g09740.1 5.60272726245193 4.65295083873185 6.851253848376781 0.615732 5.4365703579361675 -0.990914852393693 Two 4.13157861398311 Core
Chr1 3229815 3236001 VDAG_JR2_Chr1g09750.1 4.90265025960186 5.13489356761416 6.49160635545604 0.572583 5.46265751940101 -0.991264985036394 Two 5.395732866934612 Core
Chr1 3235952 3238193 VDAG_JR2_Chr1g09760.1 0.40321959297254 4.67662618436329 6.51770942521011 0.656403 3.3032708176307466 -0.99117749862773 Three 1.82483695624166 Core
Chr1 3238482 3242686 VDAG_JR2_Chr1g09770.1 6.86749627993183 5.663155562958652 5.95466244161851 0.550904 3.3328723370982907 -0.989940727333788 Two 0.736851605990628 Core
Chr1 3243013 3245433 VDAG_JR2_Chr1g09780.1 6.010187272433081 5.51408379403893 6.40810212835488 0.568595 8.153926329744296 -0.991048399155472 Two 2.8935055266686405 Core
Chr1 3246622 3247396 VDAG_JR2_Chr1g09790.1 6.36150759592416 4.3741862520275 6.368598962799783 0.605943 5.4042525197765565 -0.990363929672578 Two -1.17259506730973 Core
Chr1 3247588 3249313 VDAG_JR2_Chr1g09800.1 5.67412202161289 5.86845672043237 6.31735466527375 0.542609 4.141594537305656 -0.991418633746783 Two 2.1416786689351697 Core
Chr1 3249746 3252781 VDAG_JR2_Chr1g09810.1 6.18559243640969 5.396479513501967 6.32105024284349 0.565404 3.629168832077264 -0.9902493881278772 Two -2.42014813939974 Core
Chr1 3253085 3255401 VDAG_JR2_Chr1g09820.1 6.49562970766821 5.66197055770875 6.27195316516046 0.591105 2.915025149442739 -0.986991148909788 Two -0.6600523710293921 Core
Chr1 3255497 3256646 VDAG_JR2_Chr1g09830.1 5.51263723157339 5.32686683701556 6.5780336547963 0.5953 4.084350290973465 -0.994256017465196 Two 1.4645875576931 Core
Chr1 3257024 3259444 VDAG_JR2_Chr1g09840.1 6.1979374254855575 5.00018268491988 6.70546635979401 0.626859 5.852479010950687 -0.987806577089191 Two 2.5887521745367 Core
Chr1 3259428 3260794 VDAG_JR2_Chr1g09850.1 0.612595058321289 4.900204826605839 6.351393608381961 0.677892 4.346289652303838 -0.9901039638575 Three 2.05146387773907 Core
Chr1 3261129 3262625 VDAG_JR2_Chr1g09860.1 6.5469194722437 5.56324887297576 6.28867466547632 0.570856 4.259913370774761 -0.97867281535988 Two 2.16028246299492 Core
Chr1 3262568 3265057 VDAG_JR2_Chr1g09870.1 5.121972017859849 5.501474708135111 6.186175448650559 0.570912 4.537132364695557 -0.9912030517628408 Two -0.0624258012738362 Core
Chr1 3265213 3266773 VDAG_JR2_Chr1g09880.1 6.457032811355621 5.56314578082778 6.48305628184562 0.575641 6.30457617030527 -0.992162609524114 Two 2.39094877273721 Core
Chr1 3270071 3274489 VDAG_JR2_Chr1g09890.1 3.79074454824518 5.32239427082511 6.431410965616231 0.5595289999999999 2.7391526172983625 -0.992255966735024 Two 1.98546270921754 Core
Chr1 3274861 3276459 VDAG_JR2_Chr1g09900.1 7.06309491329249 5.29142731386571 7.00764486441175 0.556946 0.6426655355486506 -0.990362365073534 Two -4.74910202462165 Core
Chr1 3278968 3280192 VDAG_JR2_Chr1g09910.1 4.84537978839819 5.46535323769253 6.2870882837459305 0.569444 6.188104562053468 -0.993558188184504 Two 0.320061612765113 Core
Chr1 3280379 3282183 VDAG_JR2_Chr1g09920.1 5.65161984131685 5.76568310769732 6.38641766528127 0.56929 10.441906213158394 -0.993685362465816 Two 3.42340572719345 Core
Chr1 3282429 3284195 VDAG_JR2_Chr1g09930.1 4.83895676224984 5.30156839947519 6.184692380752421 0.612118 2.010675496255274 -0.990975849054082 Two -2.24629839857845 Core
Chr1 3284366 3285445 VDAG_JR2_Chr1g09940.1 6.84362878221353 5.9825104769681 5.80689976664873 0.544949 5.754505750311174 -0.9950213695346422 Two 3.16783089275755 Core
Chr1 3285600 3287979 VDAG_JR2_Chr1g09950.1 4.5057764062300185 5.4791266917707695 6.25314062237062 0.562421 3.5003905161414464 -0.98905761043826 Two 1.9257666531500104 Core
Chr1 3288046 3289603 VDAG_JR2_Chr1g09960.1 4.729346330284719 5.582636056348232 6.275251007011981 0.554913 4.706152290818848 -0.989622289997466 Two 1.64730731362425 Core
Chr1 3289851 3291291 VDAG_JR2_Chr1g09970.1 5.34496818883256 4.62639280941546 6.1949552129029 0.55625 5.87992644874532 -0.994015256998629 Two 0.31472801418219803 Core
Chr1 3291351 3291922 VDAG_JR2_Chr1g09980.1 7.72164419349327 5.20229793194083 6.3063496825264 0.56042 5.977544345698737 -0.993254481967563 Two 8.158481 
Chr1 3291913 3292488 VDAG_JR2_Chr1g09990.1 7.4465016584694 6.22729809254034 6.49640944707396 0.554783 4.983734724096536 -0.991705647058763 Two 0.545252617184593 Core
Chr1 3292587 3293294 VDAG_JR2_Chr1g10000.1 6.482388803311548 5.272027257609559 6.62956732432695 0.60396 4.872085589301264 -0.9892656123760428 Two 1.6447942118661698 Core
Chr1 3293320 3294604 VDAG_JR2_Chr1g10010.1 4.9722659114542695 4.718700324269241 6.1263027882418895 0.602025 4.608878009255931 -0.990133356147728 Two 1.19608456709647 Core
Chr1 3294865 3296002 VDAG_JR2_Chr1g10020.1 6.734733716808161 4.93458252650169 6.383799995197848 0.582234 6.527524145242066 -0.9932605216545493 Two -0.156334930594686 Core
Chr1 3296222 3298595 VDAG_JR2_Chr1g10030.1 5.39609328050521 5.28555201885296 6.454131875898 0.585335 4.770111924545962 -0.990924163172783 Two 0.8643006175008929 Core
Chr1 3298572 3300551 VDAG_JR2_Chr1g10040.1 5.58259337171924 5.32313839405388 6.122993591408581 0.547751 1.8236550400614648 -0.993000473446062 Two -0.4032405660205471 Core
Chr1 3301933 3304225 VDAG_JR2_Chr1g10050.1 6.00481155084268 5.51313262146104 6.34680721772217 0.5510470000000001 4.06282777553149 -0.9932972605651508 Two 1.594717206726 Core
Chr1 3305176 3308221 VDAG_JR2_Chr1g10060.1 5.61287126328284 5.22551717127845 6.64578664455532 0.583908 6.950390446104192 -0.9904997191761592 Two 3.03455281096571 Core
Chr1 3308184 3309615 VDAG_JR2_Chr1g10070.1 0.0 4.87829779783759 6.40862166787701 0.649895 3.649571711452576 -0.993066333865462 Three 1.13923426051345 Core
Chr1 3309738 3310705 VDAG_JR2_Chr1g10080.1 5.553298017170088 5.5347014435874415 6.76370965546204 0.5946229999999999 6.608504655254286 -0.9915844888295272 Two 2.87120387445567 Core
Chr1 3310939 3314866 VDAG_JR2_Chr1g10090.1 5.71742894500885 4.51519268051019 6.42562999752196 0.6170100000000001 2.7274249871694347 -0.990741270411784 Two -0.0735375515478166 Core
Chr1 3315547 3319202 VDAG_JR2_Chr1g10100.1 6.818938295773928 5.61172259422983 5.8605643304012585 0.525308 3.3124973647339258 -0.993833933752426 Two 2.36162773788238 Core
Chr1 3319122 3320580 VDAG_JR2_Chr1g10110.1 7.29346774782394 5.6944559323733 6.550194786892999 0.593278 3.0592771804217644 -0.989033515297028 Two -1.09652123500726 Core
Chr1 3320745 3321794 VDAG_JR2_Chr1g10120.1 6.533245359212017 5.32588184684339 6.6122195712723695 0.6577689999999999 4.6260543881862635 -0.990209760455456 Two -0.35724288000434706 Core
Chr1 3321756 3323190 VDAG_JR2_Chr1g10130.1 6.86292314377177 4.8411945867444 6.572140821663848 0.596932 3.0650379053994543 -0.98949840840311 Two 0.991934382197494 Core
Chr1 3323729 3325042 VDAG_JR2_Chr1g10140.1 5.475036137340468 5.8731477620806505 6.5221875597679695 0.582635 4.03710067147943 -0.992399350001678 Two 0.6694303561004781 Core
Chr1 3325521 3326224 VDAG_JR2_Chr1g10150.1 7.943437996366121 5.65594888389258 6.869960685620391 0.59175 5.5065446981065085 -0.992834281422995 Two -0.18379516456150896 Core
Chr1 3326421 3328955 VDAG_JR2_Chr1g10160.1 5.66162920900877 6.087411581677281 6.45042886384722 0.514601 1.4320991972677253 -0.991888736389787 Two -0.939224198905443 Core
Chr1 3329123 3335781 VDAG_JR2_Chr1g10170.1 6.21453053838051 5.022937184694509 6.38646179665162 0.591169 3.6304402923773367 -0.992151706938447 Two 1.1441619392058202 Core
Chr1 3336197 3337858 VDAG_JR2_Chr1g10180.1 0.521104381271637 5.11271892975021 6.76132037408097 0.626129 0.9945329652239004 -0.9869377850358808 Three -1.10512269204681 Core
Chr1 3338840 3339689 VDAG_JR2_Chr1g10190.1 8.21528586377819 4.76901029663415 6.95210963062641 0.57126 0.6667417506509827 -0.9867128455959432 Two -4.1761917275931 Core
Chr1 3339861 3342083 VDAG_JR2_Chr1g10200.1 3.8082332751720096 5.32316060649219 6.2890513711091 0.5945090000000001 0.8872979073733617 -0.9909313051910228 Two -4.211610407787609 Core
Chr1 3342162 3344001 VDAG_JR2_Chr1g10210.1 5.112562279544269 5.6793498241997895 6.098350698151232 0.5584560000000001 5.827977599588688 -0.993696188359642 Two 2.16325988430792 Core
Chr1 3344253 3345891 VDAG_JR2_Chr1g10220.1 5.62372810040422 5.432807045331058 6.26492746250979 0.581807 4.473778213401388 -0.9870898911126128 Two -1.14575679105946 Core
Chr1 3345818 3346792 VDAG_JR2_Chr1g10230.1 6.136866072338481 4.95318260624166 6.06486069993499 0.663244 3.3244775620820683 -0.991092999887809 Two -0.300855108352161 Core
Chr1 3349927 3351579 VDAG_JR2_Chr1g10240.1 4.44477415667688 5.57095520878646 6.3956370672310685 0.608959 5.158301403114307 -0.992636611586514 Two 1.32432986414152 Core
Chr1 3351624 3352863 VDAG_JR2_Chr1g10250.1 6.19039896190848 5.027718632219839 6.30991074147285 0.581114 4.719168333546829 -0.989648780412698 Two -1.34897795760147 Core
Chr1 3353046 3354879 VDAG_JR2_Chr1g10260.1 4.96155835259875 6.10330516605752 6.148932906056008 0.55701 2.74693504268546 -0.9907400513876372 Two -0.264960827094512 Core
Chr1 3354977 3356423 VDAG_JR2_Chr1g10270.1 6.10778413104174 5.26636477771262 6.30339985940684 0.5933609999999999 3.608149398740819 -0.986406442561479 Two 1.3089534413584 Core
Chr1 3356539 3358044 VDAG_JR2_Chr1g10280.1 4.94341562214254 4.52998470042839 6.372251061891731 0.633887 3.715117935481696 -0.992702806312576 Two 1.5429623284043898 Core
Chr1 3358138 3360722 VDAG_JR2_Chr1g10290.1 5.23398608733813 5.17549151311204 6.88382931297802 0.639706 6.138917608491341 -0.9907847412952232 Two 2.9975019733560897 Core
Chr1 3360843 3363128 VDAG_JR2_Chr1g10300.1 5.0487173164508885 4.8517682741458 6.77422411442425 0.6083149999999999 7.023696367966026 -0.99031578005772 Two 1.5107527836447598 Core
Chr1 3363490 3364901 VDAG_JR2_Chr1g10310.1 6.54597630409966 4.88518623704178 6.533333057978799 0.64635 6.016275268670661 -0.99453889000651 Two 0.626820660027413 Core
Chr1 3365115 3365980 VDAG_JR2_Chr1g10320.1 4.11189594240844 5.69619938834493 6.478952112228613 0.610405 6.381518847107017 -0.9924289882411088 Two -0.9066542882770192 Core
Chr1 3366045 3369109 VDAG_JR2_Chr1g10330.1 5.9256732701735695 4.41860652164867 6.4719734893318295 0.694517 1.7359408255166169 -0.992662692177587 Two 0.0185999827621358 Core
Chr1 3370859 3376026 VDAG_JR2_Chr1g10340.1 3.04830385223611 4.8670830146178465 6.428387286232097 0.6460229999999999 0.8269675785375351 -0.992208093188241 Two -0.665430353318848 Core
Chr1 3376362 3379737 VDAG_JR2_Chr1g10350.1 5.17449253481949 5.14811894828383 6.82450834755821 0.610963 4.7590978639301715 -0.991864327163348 Two 0.925132611230466 Core
Chr1 3381310 3385022 VDAG_JR2_Chr1g10360.1 6.54942307659226 5.40558587391846 6.855661588856031 0.579472 5.126963464862942 -0.993300726351514 Two -1.21328678953933 Core
Chr1 3384823 3387130 VDAG_JR2_Chr1g10370.1 4.163053237442879 4.63020244821938 6.582912175844951 0.6514949999999999 2.0305776516602374 -0.991479304434336 Two -2.23665883208564 Core
Chr1 3387387 3388718 VDAG_JR2_Chr1g10380.1 3.78225851777981 5.12041735704456 6.33021143440716 0.6085649999999999 5.715678809107872 -0.991164260470339 Two 0.585508884609879 Core
Chr1 3388883 3390485 VDAG_JR2_Chr1g10390.1 0.7455504827926109 5.02374370135218 6.473909140875571 0.650437 2.859643556156453 -0.990677938070779 Three -0.34301558524542497 Core
Chr1 3391073 3393379 VDAG_JR2_Chr1g10400.1 6.53630854516705 4.81732242309599 6.49077775181776 0.587598 6.245066038304036 -0.989636252476202 Two 2.88718121842314 Core
Chr1 3393716 3397229 VDAG_JR2_Chr1g10410.1 1.34638905533712 4.77836311441842 6.45623813323329 0.6117279999999999 6.1551785312858796 -0.990415543284961 Three 4.36862720748205 Core
Chr1 3396936 3403055 VDAG_JR2_Chr1g10420.1 5.86044038799832 5.22972565035617 6.43737587621784 0.608923 5.784785873556293 -0.991706419678 Two 3.8762933172043503 Core
Chr1 3403313 3409568 VDAG_JR2_Chr1g10430.1 5.3402188842325 5.14286317532434 6.590572307276712 0.619984 3.708956852466116 -0.99098786436153 Two 2.59438769653621 Core
Chr1 3410794 3415778 VDAG_JR2_Chr1g10440.1 6.1205935219796 5.36175570769337 6.39785342174698 0.587681 3.8672778465985984 -0.990368498643258 Two 1.56384081544759 Core
Chr1 3415726 3417436 VDAG_JR2_Chr1g10450.1 1.18126844563495 4.23233798040906 6.66219763489591 0.6543859999999999 2.5646390831481574 -0.990268461982226 Three -0.5652953025940329 Core
Chr1 3417676 3419698 VDAG_JR2_Chr1g10460.1 5.3331327706573095 5.14672784973079 6.52297970783344 0.623145 2.728528317467692 -0.9896970358645591 Two -0.18690017261522 Core
Chr1 3421136 3423680 VDAG_JR2_Chr1g10470.1 5.57671116286276 5.697611684185492 6.35187413850842 0.587264 4.526673512377839 -0.986921085090335 Two -0.0289849770877987 Core
Chr1 3425984 3427332 VDAG_JR2_Chr1g10480.1 8.42774627185707 8.78456872983115 6.969331952204371 0.571958 2.9672871209474785 -0.989519661127287 One -6.61518061639246 Core
Chr1 3428959 3430196 VDAG_JR2_Chr1g10490.1 4.9168929515155 6.294373891400388 6.7983417761406 0.5675020000000001 0.4861401264788164 -0.991413849119664 Two -3.81202573674262 Core
Chr1 3432775 3434320 VDAG_JR2_Chr1g10500.1 6.7780026283259 5.17657398799734 6.98339808327183 0.5825239999999999 1.9878277781565776 -0.990205452421564 Two -0.530374344135584 Core
Chr1 3436237 3441156 VDAG_JR2_Chr1g10510.1 6.0445094584382 4.8316516258963 6.64488534219743 0.636105 3.6641426324275774 -0.991656092760934 Two 1.31735743149163 Core
Chr1 3441432 3443331 VDAG_JR2_Chr1g10520.1 6.992490461266309 5.3540088134162005 6.379622152895499 0.5918899999999999 3.6565026957452207 -0.99182072142703 Two 1.7570398112706298 Core
Chr1 3443544 3446372 VDAG_JR2_Chr1g10530.1 5.67476642971157 5.72243090680301 6.21257394493958 0.5859260000000001 2.7455317334244578 -0.9898378001261008 Two 1.32379672851382 Core
Chr1 3446431 3448995 VDAG_JR2_Chr1g10540.1 6.22303090823163 4.89638275675766 6.63261559678785 0.6088140000000001 5.580543087915811 -0.990540316908781 Two 3.25988174572502 Core
Chr1 3449610 3452951 VDAG_JR2_Chr1g10550.1 5.25556928284262 5.08605593298846 6.590410124044 0.606405 3.0232375634016253 -0.991327232505744 Two 0.9591822774874632 Core
Chr1 3452915 3454324 VDAG_JR2_Chr1g10560.1 0.823173912554504 5.17942928586675 6.54626131380677 0.672818 4.295883991349898 -0.9911416716112808 Three 2.03279961146989 Core
Chr1 3454810 3455967 VDAG_JR2_Chr1g10570.1 0.392079242206074 6.1978835328731705 6.40749406616352 0.544512 4.752307198292763 -0.989869858618368 Three 1.42191688611101 Core
Chr1 3455790 3457915 VDAG_JR2_Chr1g10580.1 5.12952280869816 4.7902264568006 6.11865370682137 0.6122350000000001 3.898074081664697 -0.9865756613998308 Two 1.3309348546905502 Core
Chr1 3458253 3460161 VDAG_JR2_Chr1g10590.1 7.11944314791486 5.3924083289029 6.49196502209876 0.6194970000000001 3.046289906105544 -0.991847719556428 Two -6.7873025856662 Core
Chr1 3460349 3462085 VDAG_JR2_Chr1g10600.1 6.09663656211988 5.1751055272348605 6.19664483087176 0.635945 2.0865898202573634 -0.99152639734024 Two -0.16014655946295495 Core
Chr1 3461933 3463755 VDAG_JR2_Chr1g10610.1 6.8482938450641 5.00774794619308 6.04507332136391 0.545006 2.41983744667968 -0.992927951324498 Two 0.373495716747448 Core
Chr1 3463724 3464689 VDAG_JR2_Chr1g10620.1 6.88041509490455 5.42638100792267 6.52607607394523 0.590674 2.019636651887913 -0.9924845483729 Two -1.1551511766733702 Core
Chr1 3467069 3468151 VDAG_JR2_Chr1g10630.1 5.00249783477418 5.3959255724430895 6.82409431758801 0.542514 7.478534621017082 -0.9827595499111692 Two -0.510549386160941 Core
Chr1 3468269 3469865 VDAG_JR2_Chr1g10640.1 4.59044372911878 4.7222928891160585 6.461290920365441 0.621554 4.735819632388358 -0.991070645035232 Two 1.6907701389213503 Core
Chr1 3469904 3471359 VDAG_JR2_Chr1g10650.1 5.33926422630686 5.54610191142491 6.764817439131839 0.557388 0.9456183850480115 -0.9908360336028442 Two -2.23617544376937 Core
Chr1 3471980 3475846 VDAG_JR2_Chr1g10660.1 6.12292603531533 5.439105401301499 6.525868729073348 0.626487 1.6545426912144954 -0.9899677748755358 Two 0.35080789229848697 Core
Chr1 3476198 3478006 VDAG_JR2_Chr1g10670.1 5.40486925239704 5.18721759606192 6.051401884211321 0.59292 4.430798916385032 -0.9901020866010593 Two 0.6800695245746109 Core
Chr1 3478070 3479487 VDAG_JR2_Chr1g10680.1 5.20760759989838 5.059342053302459 6.24991063187068 0.662668 3.5037622928544305 -0.992365757074659 Two -1.7188927949028605 Core
Chr1 3479964 3481025 VDAG_JR2_Chr1g10690.1 0.0 4.256593662434431 6.499937105008558 0.71819 1.1194801047685772 -0.9925463351033672 Three -4.87468596383155 Core
Chr1 3481183 3482859 VDAG_JR2_Chr1g10700.1 5.18408562276013 5.499929492957442 6.19845502369073 0.586515 0.9191419157453901 -0.991868725765632 Two -2.28763120986746 Core
Chr1 3483259 3487894 VDAG_JR2_Chr1g10710.1 6.387294553312651 5.7284232876259695 6.416622777007 0.567638 3.630635870046991 -0.988517934081852 Two 2.0808785005033896 Core
Chr1 3488433 3491385 VDAG_JR2_Chr1g10720.1 6.312076642594299 5.605941078348299 6.52743940432881 0.5826560000000001 4.742649713681829 -0.990664063948082 Two 0.396516532437174 Core
Chr1 3491748 3492625 VDAG_JR2_Chr1g10730.1 6.064317613589551 5.063980131675001 6.283172366398048 0.5883689999999999 5.2323178160090285 -0.988687021776129 Two -1.42644543081839 Core
Chr1 3492649 3493581 VDAG_JR2_Chr1g10740.1 5.66169897173522 4.9044717968928095 5.98536757308694 0.51073 6.787449714220954 -0.983249915250902 Two -0.121897704683841 Core
Chr1 3493813 3496480 VDAG_JR2_Chr1g10750.1 6.54316289311376 5.27579631882924 6.5813652683807815 0.6003 4.419056618023899 -0.9900851863617008 Two 3.0804840120699195 Core
Chr1 3498155 3499397 VDAG_JR2_Chr1g10760.1 1.29546232889353 5.7673036121843095 6.83802556906642 0.552335 5.229240178815849 -0.98600129671863 Three 1.1126689302393895 Core
Chr1 3499262 3501472 VDAG_JR2_Chr1g10770.1 5.38228293482095 5.28406796987549 6.20176661758474 0.5972850000000001 5.608595171344987 -0.9897078142078342 Two 10.399273 
Chr1 3501867 3502982 VDAG_JR2_Chr1g10780.1 0.7207976031714889 5.38448382733897 6.40914042825248 0.6053810000000001 6.35007535393212 -0.9887165462618408 Three -4.08917237208225 Core
Chr1 3503245 3505070 VDAG_JR2_Chr1g10790.1 6.27463297841982 5.72187702575707 6.1745757767818406 0.591781 6.069020223204089 -0.990032663387221 Two 2.41419000487224 Core
Chr1 3506274 3507640 VDAG_JR2_Chr1g10800.1 7.50085701630644 5.97846529091375 6.652538589072652 0.535139 2.121039788394996 -0.98675911127048 Two -0.54215498035021 Core
Chr1 3511126 3515604 VDAG_JR2_Chr1g10810.1 6.17322806778209 5.8263103081882415 6.569934542632233 0.5553819999999999 6.596355294265951 -0.992223068651894 Two 3.2157864604033195 Core
Chr1 3515851 3518917 VDAG_JR2_Chr1g10820.1 5.55334294581118 5.63872761949742 6.01587719638674 0.560013 3.1830863049811806 -0.992717418318624 Two 0.113304040880696 Core
Chr1 3518867 3520801 VDAG_JR2_Chr1g10830.1 4.87758682401475 4.414221158777651 6.35158222409706 0.662358 2.3934271914212184 -0.992254264806786 Two -1.43915244254644 Core
Chr1 3520619 3524605 VDAG_JR2_Chr1g10840.1 0.24036369938291 5.22536451430253 6.423308466311541 0.6001 3.6772784677759462 -0.9924517884683772 Three 2.90456441426637 Core
Chr1 3525138 3527277 VDAG_JR2_Chr1g10850.1 6.41714558544053 5.31545407539203 6.358306284411943 0.568022 3.276123963593935 -0.992169126621206 Two 1.5595049105021102 Core
Chr1 3527232 3530242 VDAG_JR2_Chr1g10860.1 6.279912086727848 5.0429480995729605 6.36746244518904 0.569103 2.3771878280677776 -0.9919000697278192 Two 0.0830906650447153 Core
Chr1 3530665 3535514 VDAG_JR2_Chr1g10870.1 6.76283059684257 5.39346222102171 6.380884884517911 0.5945560000000001 1.7341086153657888 -0.9903308310393 Two 0.8197226849715149 Core
Chr1 3535822 3536557 VDAG_JR2_Chr1g10880.1 5.82141989071107 4.78052873664564 6.6341226847835815 0.6408159999999999 0.9618360176538372 -0.992628011343648 Two -1.98226342609071 Core
Chr1 3536332 3538078 VDAG_JR2_Chr1g10890.1 5.2177718674168885 4.9271592664459005 6.33774498217837 0.644903 4.417735785129668 -0.992114092391713 Two -0.880946257285463 Core
Chr1 3539564 3541430 VDAG_JR2_Chr1g10900.1 1.1122159225789598 4.259779267133872 6.47476485617355 0.598607 5.984666603411009 -0.9901195800124648 Three 1.0046644207441802 Core
Chr1 3541727 3545042 VDAG_JR2_Chr1g10910.1 6.06950357262306 5.65299768886554 6.14446223047274 0.548718 5.211079964214987 -0.991631013868389 Two 2.4425428846940296 Core
Chr1 3544930 3548641 VDAG_JR2_Chr1g10920.1 6.36788960799922 5.893932884942419 6.10662618842155 0.5437890000000001 6.098894897612483 -0.992843840600544 Two 4.32262366728511 Core
Chr1 3549653 3551025 VDAG_JR2_Chr1g10930.1 5.73893030538978 6.29947012817298 6.26155014472013 0.568513 5.5473202954251954 -0.984750230318718 Two -1.46108353801363 Core
Chr1 3551111 3552039 VDAG_JR2_Chr1g10940.1 0.8308144882337559 5.806396406593749 6.367339769004201 0.6002149999999999 7.73143442401529 -0.9878962185707292 Three -1.60408119981002 Core
Chr1 3552531 3553276 VDAG_JR2_Chr1g10950.1 4.51249261514075 5.82604361309473 6.5829102465179 0.5503359999999999 2.050766620758064 -0.997277933077572 Two -2.3634534599925496 Core
Chr1 3554015 3556195 VDAG_JR2_Chr1g10960.1 6.75800154777691 5.37968817691998 6.22121876389143 0.555046 9.528764909456607 -0.9920768697850229 Two 3.0104820104846697 Core
Chr1 3556297 3557095 VDAG_JR2_Chr1g10970.1 0.0 5.55955369400664 6.21007220343062 0.5977439999999999 4.7326141673825814 -0.9871927014295 Three -0.208664694971701 Core
Chr1 3557234 3562367 VDAG_JR2_Chr1g10980.1 5.08801032331062 5.7315114119039 6.12513875390064 0.5528930000000001 1.0005946711012579 -0.991208969107272 Two -0.4195234481039141 Core
Chr1 3562769 3564049 VDAG_JR2_Chr1g10990.1 7.84678903651975 6.04793365069862 6.070118693741809 0.532031 2.1967402130692317 -0.995042280204033 Two -0.4315096239456789 Core
Chr1 3565717 3566812 VDAG_JR2_Chr1g11000.1 0.411388418104697 5.21836123272304 6.32246574922624 0.6045659999999999 0.8638183095999495 -0.990129755975939 Three -0.0217226164218318 Core
Chr1 3569101 3572779 VDAG_JR2_Chr1g11010.1 5.36725707384625 5.209811402296 6.20412181666143 0.601414 0.8031546279609513 -0.9909959541810012 Two -10.375617 
Chr1 3573036 3573825 VDAG_JR2_Chr1g11020.1 7.11726755793419 5.2658789677945 6.5936142343167985 0.6007600000000001 6.316893491167004 -0.9921242258752858 Two -0.222289426239021 Core
Chr1 3573885 3576655 VDAG_JR2_Chr1g11030.1 4.83401881884205 5.33334443467152 6.44767334011666 0.6249100000000001 3.7859595083548254 -0.9910325796494008 Two 1.41481586201847 Core
Chr1 3576995 3578960 VDAG_JR2_Chr1g11040.1 6.101513946017271 5.4223101197159504 6.777935203493941 0.5659029999999999 4.004331201727361 -0.9914039763116148 Two -0.704802719005913 Core
Chr1 3578887 3580281 VDAG_JR2_Chr1g11050.1 6.05691389060737 4.39052112052696 6.88077091979053 0.581779 1.8677800068088344 -0.9794995479009608 Two -0.7443145640665029 Core
Chr1 3581810 3583118 VDAG_JR2_Chr1g11060.1 6.08423885757513 6.00030855668944 5.9780391564097 0.520642 3.627700009639897 -0.9874162451737212 Two -2.709962 
Chr1 3583166 3584322 VDAG_JR2_Chr1g11070.1 5.05280745741367 6.60660687684551 6.4486272363867 0.5406569999999999 3.378944898450145 -0.99263123878796 Two 2.032984920628 Core
Chr1 3591985 3594181 VDAG_JR2_Chr1g11080.1 5.801911028115232 5.12457896517826 6.41586911455754 0.580601 3.648909075414744 -0.9905859695921272 Two -0.42244255303546296 Core
Chr1 3594079 3595319 VDAG_JR2_Chr1g11090.1 5.42488150013078 4.916988399599131 6.4348641747367 0.675806 2.83174907249894 -0.990651243589529 Two -1.4718625619533998 Core
Chr1 3595474 3596294 VDAG_JR2_Chr1g11100.1 0.9116903003280392 5.77578905483049 6.615733031443289 0.559756 6.3361070407058975 -0.99112379947916 Three -0.104677049519173 Core
Chr1 3596547 3597964 VDAG_JR2_Chr1g11110.1 4.27491925547569 4.90880179401914 6.62256188387949 0.6824279999999999 3.4597421069611043 -0.996015263580664 Two 1.19656844515197 Core
Chr1 3597915 3598575 VDAG_JR2_Chr1g11120.1 7.19053750962774 6.2308881644578005 6.21326043912372 0.513636 2.6695032888911103 -0.9857471339468208 Two -0.391601725124508 Core
Chr1 3598475 3602135 VDAG_JR2_Chr1g11130.1 6.0627611936304415 5.2206109904272315 6.156751270991241 0.581421 3.4156175556406394 -0.990520178897804 Two 2.5038373009567403 Core
Chr1 3604240 3604750 VDAG_JR2_Chr1g11140.1 7.62899489412814 6.10098023713269 5.9672829913381324 0.531373 0.1363335851012314 -0.98813132669263 Two -6.88501115271346 Core
Chr1 3606749 3610291 VDAG_JR2_Chr1g11150.1 6.53616277061643 5.88053420805868 6.051318055338169 0.539808 3.4386815833236235 -0.992459217464092 Two 1.5043622668593402 Core
Chr1 3610503 3612299 VDAG_JR2_Chr1g11160.1 6.07442041049935 5.79354882018742 6.17794188989866 0.538419 4.14634642778404 -0.989382892625971 Two 1.41872013691298 Core
Chr1 3612231 3612681 VDAG_JR2_Chr1g11170.1 6.97098990501607 6.48270969583894 5.77769164506914 0.542222 2.524146653451357 -0.990801063153535 One -7.2109714 
Chr1 3612984 3613827 VDAG_JR2_Chr1g11180.1 5.990409186043952 5.94262537438641 6.140069338728138 0.62159 4.558356027177489 -0.994590309889715 Two -0.34717359404129805 Core
Chr1 3613958 3614867 VDAG_JR2_Chr1g11190.1 8.946851081365018 7.77439753111851 5.957550915322679 0.510451 4.001343589792309 -0.994199380303858 One 0.0381841889176735 Core
Chr1 3615630 3617391 VDAG_JR2_Chr1g11200.1 5.691479287388329 6.118775071294639 6.107936426350089 0.568427 1.0733027127070078 -0.990121871433224 Two -1.66471450237859 Core
Chr1 3617532 3618447 VDAG_JR2_Chr1g11210.1 6.599242517326831 6.472318686029941 6.1658526293065 0.514754 1.5371693260089117 -0.996375136181246 Two -1.94794369770096 Core
Chr1 3618751 3620323 VDAG_JR2_Chr1g11220.1 4.66466856223456 4.606147305909941 6.4193526890732 0.650127 4.932651575769662 -0.9908211457985028 Two -1.4728295018187298 Core
Chr1 3620589 3622548 VDAG_JR2_Chr1g11230.1 4.2948503249521 4.6668331728889685 6.572425318517983 0.608984 4.1686873562106666 -0.993924373344163 Two 1.42287024507869 Core
Chr1 3623043 3624087 VDAG_JR2_Chr1g11240.1 1.25358782984553 6.387577632067809 6.321675944436519 0.530651 6.950758233323941 -0.9939197964941942 Three 3.38743900239121 Core
Chr1 3624055 3625177 VDAG_JR2_Chr1g11250.1 6.354526606579901 6.3906517473822 6.1257957321255185 0.600713 6.016090124606028 -0.99295672299588 Two -0.0841734130188726 Core
Chr1 3625193 3626052 VDAG_JR2_Chr1g11260.1 6.68944514979612 5.42704900013111 6.22514571690884 0.536671 5.255519889687863 -0.9921081075953508 Two -0.0172788084313503 Core
Chr1 3626219 3627001 VDAG_JR2_Chr1g11270.1 7.406357943245442 5.76992869447572 6.36014314176224 0.5856779999999999 4.696480806258503 -0.993758241807639 Two 0.7351702500512349 Core
Chr1 3626924 3627730 VDAG_JR2_Chr1g11280.1 7.38251806326741 5.89216896635507 6.29338135621092 0.612903 4.137182797946701 -0.9893008074127072 Two 1.33501778329633 Core
Chr1 3627710 3628855 VDAG_JR2_Chr1g11290.1 7.49878553110183 5.81522301714918 6.49725816230955 0.5895199999999999 3.1299105339746287 -0.990904169262226 Two -1.3507506108500902 Core
Chr1 3629007 3629728 VDAG_JR2_Chr1g11300.1 7.29784527408408 6.30854370878842 6.51623680965399 0.533981 5.658936476783327 -0.983191712313446 Two -1.16123245344606 Core
Chr1 3629735 3631092 VDAG_JR2_Chr1g11310.1 7.16170287486479 5.66024377352057 6.160067136735308 0.565954 4.256225013293267 -0.99127839132701 Two 0.974736838926254 Core
Chr1 3631272 3633569 VDAG_JR2_Chr1g11320.1 5.12830202064946 5.47046540915792 6.23674425655423 0.5650850000000001 7.607176121001951 -0.994907131260334 Two 4.28008028678836 Core
Chr1 3633547 3635337 VDAG_JR2_Chr1g11330.1 5.536559296046409 5.423446840248599 6.36449749457911 0.551955 6.521939511050588 -0.9916580202092192 Two 4.6763896705209405 Core
Chr1 3635650 3640284 VDAG_JR2_Chr1g11340.1 5.5830914540543 5.31432109693821 6.20198250873425 0.58006 2.9496922627960114 -0.992597631064348 Two 1.32011114725856 Core
Chr1 3640502 3642481 VDAG_JR2_Chr1g11350.1 6.81210647659742 5.87858874757383 6.15546722254581 0.609904 2.674683430196138 -0.99277132949605 Two 0.7020425123156739 Core
Chr1 3643208 3645175 VDAG_JR2_Chr1g11360.1 7.461374248539209 5.77287771080788 6.542971956760451 0.555669 4.2739222463576985 -0.9932303830359368 Two 0.0684838527093937 Core
Chr1 3645429 3647950 VDAG_JR2_Chr1g11370.1 6.80645712106703 5.75553162383742 6.06723546721851 0.5410550000000001 5.606594726452223 -0.9908108285453392 Two 3.265904065894 Core
Chr1 3649948 3650752 VDAG_JR2_Chr1g11380.1 5.09824552434524 5.461374151147702 6.2918826832487404 0.599503 6.028124439290768 -0.988531239254428 Two 11.211357 
Chr1 3650647 3651402 VDAG_JR2_Chr1g11390.1 0.0 5.59948652132148 6.508302641528847 0.577483 6.021976304711617 -0.98366608890593 Three 0.883135710381712 Core
Chr1 3651421 3652159 VDAG_JR2_Chr1g11400.1 5.790345810404121 5.63167221190229 6.1131400937446 0.563686 5.7215944220396935 -0.9868283703312428 Two 9.840929 
Chr1 3653589 3654678 VDAG_JR2_Chr1g11410.1 6.30926380076855 5.66292646223397 6.341136037415558 0.578512 4.493898841917633 -0.986924914665684 Two 1.50900997758091 Core
Chr1 3654221 3655492 VDAG_JR2_Chr1g11420.1 5.27829690254063 5.96699241222255 6.47750082179623 0.558615 3.507779573284636 -0.994338400422322 Two 1.6082278108270702 Core
Chr1 3656471 3659263 VDAG_JR2_Chr1g11430.1 5.44973280464213 5.45730688442096 6.153747499792218 0.5547989999999999 5.471522384415215 -0.9885853929108392 Two 4.24390697788479 Core
Chr1 3659294 3660192 VDAG_JR2_Chr1g11440.1 6.578223925487992 6.4226851795198 6.44701362207704 0.528953 4.0586959350334215 -0.995217581120442 Two 1.18369642410144 Core
Chr1 3661517 3664486 VDAG_JR2_Chr1g11450.1 5.36740509272032 5.63564747509466 6.38765031628486 0.544291 1.1197098095465134 -0.991313735767566 Two -1.85903782252006 Core
Chr1 3665036 3665904 VDAG_JR2_Chr1g11460.1 4.9135141493074 5.921572078121869 6.62912781192949 0.56682 3.6933487469897033 -0.994543850890214 Two 0.6808782447356271 Core
Chr1 3665917 3667503 VDAG_JR2_Chr1g11470.1 6.957066840157031 5.39551224268793 6.37022765182814 0.575662 4.636767421498093 -0.991497278816074 Two 2.57777157993001 Core
Chr1 3667556 3669033 VDAG_JR2_Chr1g11480.1 3.01687754334948 5.2712561643147176 6.10750267632627 0.5639810000000001 5.121439420551914 -0.988386585331183 Two -3.1269067499924503 Core
Chr1 3669227 3670243 VDAG_JR2_Chr1g11490.1 7.03906406836926 5.647052403716072 6.54596725973019 0.583661 7.2154318383286835 -0.98691424098034 Two 0.473916952221299 Core
Chr1 3670122 3672565 VDAG_JR2_Chr1g11500.1 4.35912572093759 5.267546066724202 5.97536517504398 0.556693 2.6047361074537982 -0.992127463091933 Two 1.50094792863776 Core
Chr1 3672877 3678271 VDAG_JR2_Chr1g11510.1 5.13318814007613 5.96177936085663 6.0840354346119705 0.531516 5.200567489008936 -0.991255988397066 Two 3.9150674363134494 Core
Chr1 3679053 3680146 VDAG_JR2_Chr1g11520.1 4.2862793154183 5.93792248992731 6.23527275484495 0.541629 6.5201842287541405 -0.983477544087338 Two 0.695330756680658 Core
Chr1 3680742 3684323 VDAG_JR2_Chr1g11530.1 7.07348177708349 5.62261343729121 5.99632494218559 0.55208 5.5556774080689975 -0.990888211558443 Two 2.24444885734446 Core
Chr1 3684505 3686398 VDAG_JR2_Chr1g11540.1 5.03891199002571 5.6308636484902586 5.990112710171231 0.566297 9.131064035791914 -0.989735317488935 Two -0.13629885374530998 Core
Chr1 3687268 3688716 VDAG_JR2_Chr1g11550.1 1.32028156232596 5.55029378666425 6.78421385439178 0.587707 8.726162103620773 -0.992264351220395 Three 1.97345979111272 Core
Chr1 3688687 3690429 VDAG_JR2_Chr1g11560.1 4.57381845283172 5.45013735656225 6.43153060219313 0.607348 3.3626833511192595 -0.989156112067011 Two 1.21688316017894 Core
Chr1 3690749 3691681 VDAG_JR2_Chr1g11570.1 5.705229219086549 6.99890618244942 5.52286377375458 0.513949 1.6473607393704466 -0.991418888956206 One -4.18850997500268 Core
Chr1 3693277 3695109 VDAG_JR2_Chr1g11580.1 6.050516557561389 5.58316907169229 6.5522810213703 0.560044 7.301697239345048 -0.993307799089781 Two 3.66899481466048 Core
Chr1 3695073 3696135 VDAG_JR2_Chr1g11590.1 5.710750253331961 5.3336770888935305 5.8280881922703305 0.59887 4.216466037518987 -0.993025261412786 Two 1.59825076992781 Core
Chr1 3696654 3698644 VDAG_JR2_Chr1g11600.1 7.65295099257366 5.3960392791713785 6.3593845226494885 0.603518 2.4964764584725594 -0.989074381300323 Two 0.551066360593147 Core
Chr1 3700710 3702339 VDAG_JR2_Chr1g11610.1 0.5296705757703789 5.25588120950634 6.56014756592353 0.611418 2.4101280247657813 -0.99252778316205 Three 0.119551729866187 Core
Chr1 3702605 3704302 VDAG_JR2_Chr1g11620.1 6.18490258937033 5.544275088347268 6.441099588707839 0.629346 5.623657794510407 -0.988788013972435 Two 0.8222093664030079 Core
Chr1 3704574 3705628 VDAG_JR2_Chr1g11630.1 7.21338860636151 6.2443039442297605 6.62771249123351 0.572106 9.146388035207014 -0.993290978597494 Two 2.12123372136423 Core
Chr1 3706911 3708382 VDAG_JR2_Chr1g11640.1 6.53321253357451 6.91408902820714 6.161635154274467 0.577838 1.5183014453133452 -0.993956498387361 One -0.8960146162304871 Core
Chr1 3709378 3712311 VDAG_JR2_Chr1g11650.1 6.62480956956672 8.25838125118788 5.91432880116604 0.527105 0.32724384325543304 -0.9910810761724028 One -3.19298857455637 Core
Chr1 3713075 3714387 VDAG_JR2_Chr1g11660.1 7.6915090876502195 8.11853627293402 5.917691614874048 0.523628 1.4198456530906836 -0.9935159664298008 One -1.46216689361047 Core
Chr1 3715110 3715923 VDAG_JR2_Chr1g11670.1 6.48998592745963 8.3395417406122 5.46022260971483 0.501845 1.1141302136342663 -0.993226771404574 One -2.90714886932879 Core
Chr1 3716004 3716662 VDAG_JR2_Chr1g11680.1 8.09464053783864 7.71007825942889 5.6014021387099815 0.542553 1.370927750216924 -0.9888231017827992 One -2.91472725660328 Core
Chr1 3716879 3718280 VDAG_JR2_Chr1g11690.1 6.855037473043691 7.8492929822453785 6.2437971608848 0.539615 1.5800086063645415 -0.990459908758328 One -1.5964922270931 Core
Chr1 3719199 3721558 VDAG_JR2_Chr1g11700.1 8.06424158872457 8.06119614606129 6.609530223212628 0.536668 0.4872063406958551 -0.980794013677303 One -3.6254990123072006 Core
Chr1 3721828 3723528 VDAG_JR2_Chr1g11710.1 6.97207579230435 8.572154624562112 5.899985964353268 0.518824 0.3713197139822998 -0.9895663732190808 One -3.68136675323394 LS
Chr1 3724640 3727307 VDAG_JR2_Chr1g11720.1 7.26759895857419 8.73405856484874 6.13406657010224 0.533183 4.958559751074868 -0.988242029123828 One 1.87362782819457 LS
Chr1 3795630 3796593 VDAG_JR2_Chr1g11730.1 5.37576758945475 5.647519986215579 6.879546202593111 0.578401 0.2724740311288327 -0.99787682810703 Two -5.40438479152835 Core
Chr1 3799584 3803644 VDAG_JR2_Chr1g11740.1 6.4831563310002505 5.230190045511759 6.64975588417475 0.583498 1.63309330792552 -0.991710653610481 Two 0.4149352949279061 Core
Chr1 3804038 3804861 VDAG_JR2_Chr1g11750.1 1.46261357984418 6.120223250194711 7.02655831853034 0.585662 2.297697533514032 -0.992105616193125 Three -1.17752231712511 Core
Chr1 3805664 3809169 VDAG_JR2_Chr1g11760.1 5.61277644837067 5.11870222227592 6.14428528388513 0.5763199999999999 5.014053951388815 -0.992578875294342 Two 1.6607703688088402 Core
Chr1 3809463 3811606 VDAG_JR2_Chr1g11770.1 4.39667408939939 5.483818905006928 6.40767604449106 0.601493 4.331990419316743 -0.99051108186905 Two 2.68509764149162 Core
Chr1 3811483 3814066 VDAG_JR2_Chr1g11780.1 6.5909407175032815 5.14136032144878 6.68172892199158 0.604336 6.516608400966492 -0.993128919981211 Two 2.06743448797812 Core
Chr1 3814123 3815680 VDAG_JR2_Chr1g11790.1 6.4635767901412775 6.10790955446324 6.577905321964692 0.581888 4.889773321919763 -0.9925858431528428 Two -1.03499813852112 Core
Chr1 3815641 3816565 VDAG_JR2_Chr1g11800.1 6.7410510772544505 6.00751359210338 6.42144530787104 0.53355 2.687471794815158 -0.991931561877605 Two -6.555450147428732 Core
Chr1 3817072 3820165 VDAG_JR2_Chr1g11810.1 3.8859925885810096 5.5498880593395805 5.931154445337072 0.568704 4.6178510636657855 -0.9904225178546908 Two -0.160449855010912 Core
Chr1 3820940 3821678 VDAG_JR2_Chr1g11820.1 5.6567201053299705 4.97956825457019 6.75832863093604 0.578591 1.1439424984694484 -0.9845045396878142 Two -2.8220869528547103 Core
Chr1 3822194 3824540 VDAG_JR2_Chr1g11830.1 7.109261841891639 4.2686916642112 6.38264678034287 0.595908 2.181951502215293 -0.990660026583762 Two 0.3944325615484061 Core
Chr1 3828077 3833005 VDAG_JR2_Chr1g11840.1 3.1207509068093904 5.55843965895645 6.66708305702516 0.5702109999999999 2.649457300921707 -0.9898600262466752 Two -0.40296321436882 Core
Chr1 3834807 3835348 VDAG_JR2_Chr1g11850.1 6.377586732571159 6.16639149996372 6.683972389827559 0.543438 1.074003544364088 -0.9921271562287112 Two -3.65718071284898 Core
Chr1 3835633 3836180 VDAG_JR2_Chr1g11860.1 5.41324234836357 4.636598135835481 7.55848680634079 0.619744 0.12624154800040366 -0.976730220677153 Two -10.475945 
Chr1 3838895 3840655 VDAG_JR2_Chr1g11870.1 7.68853569941548 4.875307295154982 6.41051688655894 0.5778409999999999 5.390056629229933 -0.9917786256822309 Two 1.03960186335419 Core
Chr1 3840838 3844632 VDAG_JR2_Chr1g11880.1 5.2460348357548385 5.23253800637655 6.10409368162917 0.602003 1.4111375476001211 -0.988440307600654 Two -0.00232044389005171 Core
Chr1 3844614 3847302 VDAG_JR2_Chr1g11890.1 6.2454584876516295 5.43492508575655 6.53457420825488 0.591518 3.519117209746903 -0.9906944019356642 Two -1.00067485206688 Core
Chr1 3847882 3851598 VDAG_JR2_Chr1g11900.1 6.1379790146335695 5.07709433278698 6.279515868474983 0.602799 3.891188321344509 -0.9902219924839673 Two 0.148837639845549 Core
Chr1 3851813 3855392 VDAG_JR2_Chr1g11910.1 6.75097657077668 5.44793281739612 6.12924003491587 0.536742 5.199689146316707 -0.990436897138115 Two 3.34663450115842 Core
Chr1 3856092 3857208 VDAG_JR2_Chr1g11920.1 5.373979210678941 5.8067643705490495 6.60435380030875 0.5456989999999999 1.6141270828746663 -0.9889659497250228 Two -1.52652007636357 Core
Chr1 3857504 3860377 VDAG_JR2_Chr1g11930.1 5.698587165987519 4.7028473886584194 6.53039410279997 0.5851029999999999 4.828865278017033 -0.9917806354935492 Two 1.19765627928048 Core
Chr1 3862519 3865789 VDAG_JR2_Chr1g11940.1 6.57030302023507 5.95414988604748 6.0170269812692405 0.555046 4.784400431177197 -0.99295410217028 Two 1.46567401820694 Core
Chr1 3865544 3868214 VDAG_JR2_Chr1g11950.1 6.208263174964019 4.87665980090867 6.201634872483469 0.578652 6.784153601511611 -0.989403826007348 Two 5.61790132955704 Core
Chr1 3868569 3869551 VDAG_JR2_Chr1g11960.1 5.7932281168314885 5.31350413883541 6.22534971567107 0.5193479999999999 4.595782704309934 -0.9897316645461728 Two 2.03718057135082 Core
Chr1 3869327 3871896 VDAG_JR2_Chr1g11970.1 6.00966032788301 5.740523103581 5.86524979817394 0.553523 4.39316771123977 -0.99213788222703 Two 2.10981930668838 Core
Chr1 3872153 3876424 VDAG_JR2_Chr1g11980.1 5.9080535087351205 5.94025400795719 6.05875455304364 0.554203 3.6532309939113774 -0.991395309314092 Two 1.98104565021202 Core
Chr1 3877331 3878806 VDAG_JR2_Chr1g11990.1 7.3305317542213 5.49778932215179 6.370019433978992 0.533559 7.845516595291003 -0.990738069788618 Two -3.60368858683664 Core
Chr1 3883327 3885347 VDAG_JR2_Chr1g12000.1 4.66254413824936 5.05854102999384 6.81384637278659 0.564851 12.272906202534802 -0.9907179226814828 Two 5.764604509042551 Core
Chr1 3885537 3888531 VDAG_JR2_Chr1g12010.1 5.120601440839769 5.09277240000298 6.77301844666139 0.605878 2.7913921086154825 -0.991483475617165 Two -0.41662027336732893 Core
Chr1 3888856 3890546 VDAG_JR2_Chr1g12020.1 6.1348215407604805 5.37870287895398 6.385890990022111 0.5674560000000001 5.696196301751926 -0.99149924704996 Two -1.1452837849871202 Core
Chr1 3890494 3893561 VDAG_JR2_Chr1g12030.1 5.2697886627981205 4.79875650932751 6.31622463139304 0.6429739999999999 3.605602002381768 -0.9923802599286832 Two 2.4637514532550697 Core
Chr1 3894948 3895886 VDAG_JR2_Chr1g12040.1 7.34337420461832 6.41042301575408 5.54861611024865 0.486141 1.2511020083985085 -0.9907004392622378 Two -2.45879710038571 Core
Chr1 3896297 3897798 VDAG_JR2_Chr1g12050.1 5.6946202663694505 4.5789532380569415 6.526628425576988 0.5976020000000001 4.8456644973153296 -0.990597626777004 Two -0.44134657439589 Core
Chr1 3898302 3900560 VDAG_JR2_Chr1g12060.1 4.6347151945588 4.54661912049311 6.36895771357121 0.650133 4.0119029727354905 -0.991716787214285 Two 1.43486485677066 Core
Chr1 3900675 3901820 VDAG_JR2_Chr1g12070.1 0.0 5.01877264677723 6.19872341572867 0.613974 3.4258752888083697 -0.990649756370852 Three -1.05261750558189 Core
Chr1 3902308 3903484 VDAG_JR2_Chr1g12080.1 1.15636538775089 5.611078897827929 5.9473224859938005 0.539116 6.208064056059079 -0.9885348135065448 Three 35.78687 
Chr1 3903521 3907176 VDAG_JR2_Chr1g12090.1 3.2178117452333903 5.82318147454838 5.9494494937054805 0.5329689999999999 5.640890609655208 -0.989590657444414 Two 2.93811052567042 Core
Chr1 3907500 3909469 VDAG_JR2_Chr1g12100.1 6.594004798701251 5.44453644226523 6.38902466980042 0.576435 6.127040987099898 -0.99191852436772 Two 1.48028042809505 Core
Chr1 3909697 3912475 VDAG_JR2_Chr1g12110.1 5.807771230770558 5.6992477586747805 6.367992307578733 0.559395 6.711883434100945 -0.9904383301728232 Two 1.44499178614143 Core
Chr1 3913058 3913796 VDAG_JR2_Chr1g12120.1 8.07039778384759 5.44525250753695 7.11516286097942 0.565041 3.4323015248780995 -0.988241496721698 Two 0.117530001138354 Core
Chr1 3914107 3914919 VDAG_JR2_Chr1g12130.1 8.31204470525535 5.7040895689244815 6.63761867925701 0.612069 4.215120523299883 -0.9924251234904532 Two 1.15014254522301 Core
Chr1 3914867 3917376 VDAG_JR2_Chr1g12140.1 6.993646447754401 5.96867551102016 5.93079172087464 0.524512 3.1297635055104136 -0.9929136843502908 Two 0.660740797008042 Core
Chr1 3917820 3920595 VDAG_JR2_Chr1g12150.1 6.42445187941542 5.5960880713698 5.82173174494897 0.535135 6.594916679336247 -0.990587150783746 Two 2.51549723069283 Core
Chr1 3920932 3925982 VDAG_JR2_Chr1g12160.1 6.046745839738 5.6420982643269015 6.03841295335567 0.550099 4.656961907849947 -0.992392129498086 Two 3.30029635666807 Core
Chr1 3926148 3928256 VDAG_JR2_Chr1g12170.1 7.4438908412732605 5.229895666877058 6.60388016319749 0.610531 4.457692876901218 -0.99405686063397 Two 0.3305820096647151 Core
Chr1 3928525 3930506 VDAG_JR2_Chr1g12180.1 5.8601591011917185 4.8101020045692495 6.57005862919178 0.618375 4.896019686316643 -0.9908448447445508 Two 1.3082005168810702 Core
Chr1 3930752 3932020 VDAG_JR2_Chr1g12190.1 5.12551063206096 5.904009188852791 6.48926773457582 0.5701890000000001 4.259029587104097 -0.991703016477322 Two -2.3733931253225897 Core
Chr1 3932448 3934646 VDAG_JR2_Chr1g12200.1 0.41008506891292895 5.84267763628555 6.195276653256871 0.584622 5.917989721196912 -0.992119010968296 Three -1.20779823378644 Core
Chr1 3935223 3937372 VDAG_JR2_Chr1g12210.1 4.2213877292602495 5.80681997648193 6.75407468560843 0.571894 5.689525053447689 -0.991431630101758 Two -0.939484172731483 Core
Chr1 3937700 3940094 VDAG_JR2_Chr1g12220.1 6.5070119475944015 5.92109785028932 6.2559675232648 0.569758 5.420740679758982 -0.988635477139783 Two 2.11867271169688 Core
Chr1 3940395 3942627 VDAG_JR2_Chr1g12230.1 4.4937613900888085 5.832146794775491 6.409957437877929 0.5761649999999999 2.5184361229646672 -0.992334697189078 Two 0.705224119995201 Core
Chr1 3942666 3944972 VDAG_JR2_Chr1g12240.1 6.609897203219267 5.5480223762395084 6.15245776726348 0.585429 0.4770489660432098 -0.991434266825098 Two -3.93670750284051 Core
Chr1 3945810 3947995 VDAG_JR2_Chr1g12250.1 3.44911309886228 6.10617609343032 6.33881237693863 0.585812 2.600262682641065 -0.9826859461507228 Two 0.981774728696574 Core
Chr1 3947898 3953120 VDAG_JR2_Chr1g12260.1 5.266829621668241 5.698031839094241 6.11613684043761 0.546725 5.080469304948218 -0.992043623056777 Two 4.75816480488424 Core
Chr1 3954644 3957078 VDAG_JR2_Chr1g12270.1 4.98767708675305 5.515554224053839 6.0991742316002 0.536565 2.055532195034796 -0.9892531531189028 Two 0.1790246737894 Core
Chr1 3957298 3960649 VDAG_JR2_Chr1g12280.1 6.242615967997298 5.05818641378722 6.57000923756392 0.6332439999999999 4.611395361067263 -0.9881611281542292 Two 3.61673475109726 Core
Chr1 3961066 3963983 VDAG_JR2_Chr1g12290.1 6.246746854101733 5.07968401950946 6.21799884088785 0.604388 3.8917405807892447 -0.989519293120266 Two 2.62006958175552 Core
Chr1 3965104 3966477 VDAG_JR2_Chr1g12300.1 5.27169327986047 5.5249827484919285 6.45580479940559 0.5615439999999999 6.410727722270559 -0.991403474145792 Two -1.67912937405629 Core
Chr1 3968196 3969057 VDAG_JR2_Chr1g12310.1 0.505527224537504 5.05291812021062 6.399621834563191 0.626016 1.7036186137992737 -0.988200941333412 Three -1.78151909471677 Core
Chr1 3969253 3971084 VDAG_JR2_Chr1g12320.1 6.53540911761299 4.713280767933821 6.37311903387852 0.582742 5.30599355328466 -0.992140737559031 Two 1.61708791540065 Core
Chr1 3972752 3974124 VDAG_JR2_Chr1g12330.1 0.33725073055449 5.665267866640153 6.7489370289575 0.543732 0.14884320994452782 -0.99149268272394 Three -5.38221862774704 Core
Chr1 3976445 3982497 VDAG_JR2_Chr1g12340.1 4.9190349360318 5.57897362320464 6.40073146438347 0.573199 3.4949867929607383 -0.991871586626828 Two 2.32471661430412 Core
Chr1 3982806 3985062 VDAG_JR2_Chr1g12350.1 5.27786588091204 6.3554108309736375 6.02824154299415 0.552305 1.9601340158305167 -0.98710185550294 Two -1.05871260221969 Core
Chr1 3986897 3988335 VDAG_JR2_Chr1g12360.1 5.693612706167031 5.44845490652195 6.50810803923042 0.6057020000000001 9.562624312814746 -0.993671563663615 Two 6.43597582474556 Core
Chr1 3988380 3990012 VDAG_JR2_Chr1g12370.1 0.7348081310512191 5.20687040278463 6.48217665750934 0.634191 4.21688835110688 -0.994285217162482 Three 1.18892234648499 Core
Chr1 3990299 3993098 VDAG_JR2_Chr1g12380.1 6.525673353776691 4.75796494801257 6.3741299988124 0.6477310000000001 0.6811508801296845 -0.990068432376771 Two -1.8640556750620496 Core
Chr1 3993170 3995690 VDAG_JR2_Chr1g12390.1 5.445699499569111 5.59615900632018 6.240399045286031 0.563492 4.004474567016123 -0.989353713984512 Two 1.61248547331565 Core
Chr1 3995817 3997851 VDAG_JR2_Chr1g12400.1 0.916996661672183 5.61923804538975 6.232221873858321 0.566863 3.619422621372845 -0.991093587743692 Three -0.0520095012057183 Core
Chr1 3997975 3999999 VDAG_JR2_Chr1g12410.1 5.96367588889626 5.771537178797469 6.08641127335233 0.536561 3.0147135489827184 -0.99129593111914 Two 0.123739006201609 Core
Chr1 4001662 4003650 VDAG_JR2_Chr1g12420.1 5.5706777025950895 5.35657934559769 6.3451682875186695 0.533702 7.304381511917986 -0.994315615022395 Two 5.59816766527172 Core
Chr1 4009893 4015272 VDAG_JR2_Chr1g12430.1 5.50888023107354 5.352380553211192 6.49613820710135 0.5958359999999999 3.8007155427816914 -0.987678319842518 Two 3.4313698310425096 Core
Chr1 4018099 4020166 VDAG_JR2_Chr1g12440.1 4.24826238528337 5.01577189647701 6.489007495179981 0.641509 4.583767106736984 -0.989589318372764 Two 0.486892725052643 Core
Chr1 4019889 4023788 VDAG_JR2_Chr1g12450.1 6.275210997356429 5.674778613760611 6.371561976151153 0.567581 4.459899802160033 -0.988938677404512 Two 2.76351582246396 Core
Chr1 4025220 4026895 VDAG_JR2_Chr1g12460.1 6.98101538848967 5.35022477398197 6.2198193121294105 0.575522 2.69315959024002 -0.9890344414510942 Two -0.285911789816693 Core
Chr1 4026796 4029499 VDAG_JR2_Chr1g12470.1 6.4197669518779685 5.50009421665015 6.45772655533831 0.604514 1.546694860382699 -0.992910091324982 Two -2.59176501109975 Core
Chr1 4029523 4030719 VDAG_JR2_Chr1g12480.1 0.930775586094936 4.66167516412082 6.60103333870488 0.665552 3.852460124119368 -0.9928360256779072 Three 1.32525587840091 Core
Chr1 4030778 4033760 VDAG_JR2_Chr1g12490.1 5.6212716553526 5.6234385306415 6.21812083061317 0.533535 3.590314398265672 -0.99153609428491 Two 2.29848944313246 Core
Chr1 4034499 4036890 VDAG_JR2_Chr1g12500.1 6.03730483768087 5.29778838406296 6.412082026611309 0.5688 8.602692037964356 -0.991021799884169 Two 6.216369251264 Core
Chr1 4038033 4039255 VDAG_JR2_Chr1g12510.1 6.62742594824515 5.02040179788795 6.15988885949793 0.5646479999999999 11.751947249431133 -0.993925485590316 Two 3.4716860844483297 Core
Chr1 4039408 4040608 VDAG_JR2_Chr1g12520.1 1.48880242637258 6.066424037330741 6.17935296745526 0.5575 1.8448908487088185 -0.992996612262238 Three 0.35279406439337 Core
Chr1 4039408 4040564 VDAG_JR2_Chr1g12530.1 1.52372294596584 6.04929106087435 6.169921756665009 0.555363 5.536002685622368 -0.993254123543408 Three -0.348890396194989 Core
Chr1 4040663 4042307 VDAG_JR2_Chr1g12540.1 5.724299545349259 6.23679101792034 6.28721572188831 0.53528 9.208757241937032 -0.9944639416301492 Two 6.2778581590252 Core
Chr1 4043334 4044764 VDAG_JR2_Chr1g12550.1 7.5621142550038485 5.22664592909696 6.4323183809542 0.6 7.869415236672987 -0.9897810194687628 Two 3.8469291108177 Core
Chr1 4044795 4045846 VDAG_JR2_Chr1g12560.1 5.95067597226675 5.07490318964243 6.3366876500089 0.577545 6.947171008748637 -0.988614924563076 Two 1.85754632656585 Core
Chr1 4046982 4048738 VDAG_JR2_Chr1g12570.1 4.76188741226632 4.88876472521797 7.09026374642414 0.6110479999999999 3.0631195782601237 -0.98933143159238 Two 1.15290733287348 Core
Chr1 4048582 4049909 VDAG_JR2_Chr1g12580.1 6.12130243529055 5.437496141781041 6.67176812209505 0.638282 3.645979771062595 -0.993351623990634 Two 0.479946095335868 Core
Chr1 4050215 4051418 VDAG_JR2_Chr1g12590.1 5.34501260871415 4.10275035244606 6.37518721556301 0.6525350000000001 4.1114852543788905 -0.990287360761876 Two 1.159643 
Chr1 4051555 4052533 VDAG_JR2_Chr1g12600.1 6.50420396044359 5.07694364611258 6.59954602442618 0.576687 4.4475106439758365 -0.994916246797837 Two -0.169851336599156 Core
Chr1 4052913 4055944 VDAG_JR2_Chr1g12610.1 5.28638397691727 5.330004187638241 6.46800431769626 0.578357 4.889820713443114 -0.988698868729266 Two -0.3367910076143689 Core
Chr1 4056299 4058139 VDAG_JR2_Chr1g12620.1 5.3033264244133616 6.14232596049621 6.67550059009393 0.6054350000000001 5.77961574991226 -0.982928506983246 Two 3.92998482482381 Core
Chr1 4059182 4062045 VDAG_JR2_Chr1g12630.1 6.756811952141041 5.3822734884227 6.14338693787354 0.556409 6.352236237410362 -0.9920262153367868 Two 2.74233461583525 Core
Chr1 4062725 4063976 VDAG_JR2_Chr1g12640.1 0.0 5.930166405384848 6.18532521831324 0.565947 4.187820055230191 -0.989137303667018 Three -0.0700543264953297 Core
Chr1 4064021 4065761 VDAG_JR2_Chr1g12650.1 6.49316776856897 4.8061649121864685 6.859710430599249 0.594828 3.4152988817539605 -0.992575588082628 Two 1.3551861330554398 Core
Chr1 4065938 4067848 VDAG_JR2_Chr1g12660.1 4.86720978169449 5.503933724222572 6.48908144660206 0.647644 6.67918803953726 -0.9922894081016552 Two 4.92572930316497 Core
Chr1 4068086 4070714 VDAG_JR2_Chr1g12670.1 6.70582689929521 4.9167861761604685 6.481716453310652 0.634323 2.2747859292441106 -0.991747097962324 Two 0.613792137965968 Core
Chr1 4071667 4073495 VDAG_JR2_Chr1g12680.1 4.5686541208563085 5.5720196420680095 6.66699068932739 0.605033 8.048030173121658 -0.99083896204111 Two 0.389396246498591 Core
Chr1 4074156 4075340 VDAG_JR2_Chr1g12690.1 5.24506216167428 5.49900286174871 6.43092962845703 0.5751689999999999 7.413963442266209 -0.993828633230063 Two 3.93525528837027 Core
Chr1 4075501 4079095 VDAG_JR2_Chr1g12700.1 5.46033869016055 5.7354332778446615 5.948134021774349 0.533945 7.175628070938933 -0.98920557929015 Two 5.36173844569162 Core
Chr1 4082393 4084845 VDAG_JR2_Chr1g12710.1 6.36092625965818 5.68640525567418 6.28808482836213 0.558728 7.929905087114393 -0.991357847368235 Two 2.5307789516126498 Core
Chr1 4089589 4091520 VDAG_JR2_Chr1g12720.1 6.58293832391576 5.264978151356651 6.462790840588808 0.555153 5.73254052564534 -0.9928441543190808 Two 1.11223456183625 Core
Chr1 4092463 4095432 VDAG_JR2_Chr1g12730.1 5.84769818615733 5.87784095612921 6.53722500632038 0.519367 3.0294393752445616 -0.99104469476552 Two 0.252707054130763 Core
Chr1 4095409 4096221 VDAG_JR2_Chr1g12740.1 6.838777200755639 5.88535776061372 6.4831825174708495 0.607143 3.733040982372125 -0.993721943787948 Two -2.11486845933946 Core
Chr1 4097882 4098408 VDAG_JR2_Chr1g12750.1 8.23775591017575 6.220063563831509 5.7713128330120895 0.5342210000000001 0.0 -0.98315081530778 Two -12.5311 
Chr1 4100815 4101592 VDAG_JR2_Chr1g12760.1 0.9486139598324692 5.57340002739074 7.339847240404858 0.595882 0.0 -0.981771726518356 Three 31.69862 
Chr1 4102762 4108689 VDAG_JR2_Chr1g12770.1 7.007317845431781 5.62617622975672 6.00820957977224 0.566391 3.427138351495357 -0.987751784400783 Two 2.23005656136346 Core
Chr1 4109133 4110260 VDAG_JR2_Chr1g12780.1 7.20155374335045 4.88421008115903 6.36422734084677 0.654836 2.9053108512061283 -0.990893004745698 Two -0.865675678713746 Core
Chr1 4110285 4111401 VDAG_JR2_Chr1g12790.1 6.46091277876027 5.48984818716033 6.36271480287116 0.581541 5.080969275917992 -0.990372558700511 Two -2.5151770088376497 Core
Chr1 4111907 4113229 VDAG_JR2_Chr1g12800.1 5.5852269376827 5.38928785974344 6.667140192741621 0.6285930000000001 4.1077225680612175 -0.989583384054662 Two 0.8264795140659209 Core
Chr1 4113229 4115392 VDAG_JR2_Chr1g12810.1 4.04744282192147 5.40823388936462 6.380388742456829 0.618585 3.8771094497129934 -0.989117159552226 Two -0.21699249021455 Core
Chr1 4116519 4117482 VDAG_JR2_Chr1g12820.1 1.32237582079508 5.47566818557974 6.19915214872651 0.588785 2.593583258407582 -0.989547870031511 Three -0.4222035957134289 Core
Chr1 4117818 4119488 VDAG_JR2_Chr1g12830.1 4.66948292054563 5.591410284518419 5.97148253888495 0.546108 0.8275079652998247 -0.992979572322228 Two -3.70213551434579 Core
Chr1 4121259 4122898 VDAG_JR2_Chr1g12840.1 7.224782559660749 5.730421879846151 6.124392742534231 0.574741 8.812119960199514 -0.991529220830645 Two 0.984117290758404 Core
Chr1 4123808 4127860 VDAG_JR2_Chr1g12850.1 6.3864564420836105 6.28794977016033 6.0996671026385405 0.55997 4.18246460307011 -0.993633988387125 Two 2.4591873225998904 Core
Chr1 4127955 4130637 VDAG_JR2_Chr1g12860.1 5.74616404582551 5.06905627673914 6.40629675834033 0.580537 6.751517504876975 -0.990298518957223 Two 3.01611941366962 Core
Chr1 4131728 4133926 VDAG_JR2_Chr1g12870.1 5.82592616595984 5.40293047641943 6.43393704782438 0.636943 3.0931657329242457 -0.991373994984402 Two 1.38974471090246 Core
Chr1 4133920 4135811 VDAG_JR2_Chr1g12880.1 6.10895567923585 5.164146656204419 6.35104993348608 0.580645 0.5611594760493303 -0.990427288023312 Two 3.20620952015413 Core
Chr1 4133984 4135761 VDAG_JR2_Chr1g12890.1 6.19339786011593 5.19246790094343 6.338322490648861 0.578503 5.058624543316905 -0.990469633637364 Two 3.3703593257929905 Core
Chr1 4136054 4137104 VDAG_JR2_Chr1g12900.1 6.58972600849285 6.092395672484582 6.0817414556037 0.5361899999999999 6.654192747762816 -0.9917828376015658 Two -0.0946028513729754 Core
Chr1 4136868 4138102 VDAG_JR2_Chr1g12910.1 5.93819720630018 5.85818545269912 6.124919263643942 0.5575359999999999 10.590245671980377 -0.99389765022822 Two 0.8053906804648051 Core
Chr1 4139336 4142357 VDAG_JR2_Chr1g12920.1 6.700102049586201 5.48803799790118 6.382899539761668 0.565707 4.483749583330706 -0.989624513260848 Two 2.3630164188771 Core
Chr1 4142754 4144090 VDAG_JR2_Chr1g12930.1 6.18859540071808 6.31412946423402 6.00835785512733 0.532934 1.1082257790398768 -0.993202837646236 Two -3.3722551818024904 Core
Chr1 4144879 4147427 VDAG_JR2_Chr1g12940.1 5.785770543386179 4.93506393373281 6.5396363737242105 0.607928 6.6469679432384075 -0.991994735605818 Two 2.87933680433876 Core
Chr1 4148258 4151669 VDAG_JR2_Chr1g12950.1 6.49995797033399 5.46591682825163 6.11298411104614 0.55878 5.840913373529342 -0.992067101620294 Two 0.729510634418737 Core
Chr1 4154737 4156560 VDAG_JR2_Chr1g12960.1 6.375964877164099 5.66697807293674 6.384587198084098 0.543609 7.011584655807552 -0.989186917103315 Two 0.8602925732545641 Core
Chr1 4157859 4158215 VDAG_JR2_Chr1g12970.1 1.0107231524076 6.68777818032177 6.9416753329234515 0.542135 1.6922426752966224 -0.9863527829834308 Three -3.0741172424005496 Core
Chr1 4161111 4162001 VDAG_JR2_Chr1g12980.1 7.5242809086923 5.2673189724477 6.711411421380731 0.567416 6.275575487239175 -0.98969192370232 Two -1.25662492142051 Core
Chr1 4161935 4162942 VDAG_JR2_Chr1g12990.1 1.05408483755465 5.37490986872617 6.25613142173388 0.555114 6.170257498540662 -0.989957998614376 Three -0.416350918406444 Core
Chr1 4163218 4166758 VDAG_JR2_Chr1g13000.1 6.7720371138535285 5.61450256089401 6.50363241658183 0.566667 4.155971056300205 -0.9927529922164448 Two -0.21449554845585606 Core
Chr1 4169755 4170318 VDAG_JR2_Chr1g13010.1 0.0 5.66318964793387 6.41843546742782 0.5843689999999999 0.9763223721630808 -0.979774971935966 Three -3.80357447141945 Core
Chr1 4171234 4174488 VDAG_JR2_Chr1g13020.1 5.680870086098079 5.4079799427201785 6.45850265167496 0.581746 6.883985926459202 -0.988096186017026 Two 2.2352910590659 Core
Chr1 4176082 4177161 VDAG_JR2_Chr1g13030.1 5.44383768515555 6.63054760204288 6.5110850966069815 0.558851 5.949509880014802 -0.993759060025855 Two 0.4266658881562029 Core
Chr1 4177229 4180523 VDAG_JR2_Chr1g13040.1 5.688351144443129 5.95163888244328 6.463668777352692 0.566788 5.519169622060621 -0.991594538399776 Two 4.532389855369621 Core
Chr1 4180306 4184012 VDAG_JR2_Chr1g13050.1 6.648841096246112 5.93321508089053 6.110406533902 0.540475 4.172357094747744 -0.9876290183426192 Two 2.3693916374239303 Core
Chr1 4184393 4185261 VDAG_JR2_Chr1g13060.1 5.6944193994812 6.299788437337201 6.19289515882295 0.544931 5.238210203354705 -0.9914723287397208 Two 0.39767750336147706 Core
Chr1 4185511 4188863 VDAG_JR2_Chr1g13070.1 5.36476993123246 5.60062027266086 6.216102489031121 0.547733 6.10232300172724 -0.992000350258284 Two 4.1511810463121 Core
Chr1 4190136 4195157 VDAG_JR2_Chr1g13080.1 5.8104806335456 5.92651836597324 5.79020962710764 0.536945 4.0306669998309825 -0.991893369004947 Two 3.57224370194484 Core
Chr1 4195377 4197022 VDAG_JR2_Chr1g13090.1 6.69144172305724 6.202570195822752 5.97688026751009 0.559271 4.096207581014742 -0.988998205141861 Two -0.866986001129048 Core
Chr1 4197069 4200002 VDAG_JR2_Chr1g13100.1 6.41172676243917 5.38788611043205 6.403121747749621 0.541766 4.265134683760343 -0.992622295656145 Two 3.06936167607742 Core
Chr1 4200075 4202402 VDAG_JR2_Chr1g13110.1 7.665374615409568 6.1517452909355095 5.93149062146578 0.525999 2.016490898783113 -0.993303996467136 Two 0.17977577784985502 Core
Chr1 4202418 4204422 VDAG_JR2_Chr1g13120.1 5.09484149837263 5.585881058243131 6.28270548225729 0.564371 6.664994264297596 -0.9890389857576032 Two 2.53846258326631 Core
Chr1 4204969 4207293 VDAG_JR2_Chr1g13130.1 7.12757685900541 5.8708293653336385 6.04162717826846 0.54389 7.877724565485479 -0.99125885022441 Two 1.75297951760886 Core
Chr1 4208018 4208806 VDAG_JR2_Chr1g13140.1 0.0 6.03155129392723 6.93738260210447 0.57868 4.720610575061909 -0.993028574156451 Three -2.70163912764048 Core
Chr1 4209017 4211400 VDAG_JR2_Chr1g13150.1 5.86948145771736 5.5785979192158095 6.8628604651529095 0.59253 6.679209901335963 -0.986929389791353 Two 3.3801205632896103 Core
Chr1 4212695 4216652 VDAG_JR2_Chr1g13160.1 5.55520274771896 5.22724897435169 6.001061602222589 0.5516810000000001 5.389741669036944 -0.993755438674018 Two 3.69020993038085 Core
Chr1 4216758 4219239 VDAG_JR2_Chr1g13170.1 5.20832164643588 5.39121442262114 6.43317767746316 0.567513 6.361925820203178 -0.993883096395792 Two 1.14276147950527 Core
Chr1 4219780 4221507 VDAG_JR2_Chr1g13180.1 7.053160674103 6.317552707979339 5.95607736180004 0.520556 1.256113432688459 -0.992513470472521 Two -1.4634337783256102 Core
Chr1 4221884 4223246 VDAG_JR2_Chr1g13190.1 6.07863894750067 5.95974699350368 6.297412855498131 0.544053 10.187382772752603 -0.989122485860593 Two 2.2767691278157995 Core
Chr1 4224986 4227347 VDAG_JR2_Chr1g13200.1 5.3061314205686 5.666234178878831 6.318534537090678 0.551461 4.539700021344009 -0.9906629987647622 Two 2.01885697224347 Core
Chr1 4227881 4230537 VDAG_JR2_Chr1g13210.1 6.75932181768153 5.61635965104916 6.17639384366333 0.545181 4.256663046622588 -0.987953465697783 Two 0.479459795697805 Core
Chr1 4230692 4231847 VDAG_JR2_Chr1g13220.1 7.245849367818098 5.775069544439582 6.13636351310441 0.533333 6.250292911740644 -0.988845085863178 Two -1.61693107759821 Core
Chr1 4233086 4233767 VDAG_JR2_Chr1g13230.1 7.36117780821242 6.25284983765 6.11245462780993 0.5227609999999999 0.3680763669430485 -0.996943441566662 Two -4.97757538649302 Core
Chr1 4233722 4234995 VDAG_JR2_Chr1g13240.1 7.91698606712144 6.31268394429674 6.36294113855053 0.516104 1.0655118752556585 -0.991934597912713 One -2.07793677508139 Core
Chr1 4235568 4239752 VDAG_JR2_Chr1g13250.1 6.9538515244787895 6.055654047966138 6.166522085078928 0.528442 6.2516324517360475 -0.993560232002752 Two 4.63901936188015 Core
Chr1 4241508 4244729 VDAG_JR2_Chr1g13260.1 6.46570338568923 5.55971057314591 6.43676147205475 0.572183 3.5841251328268764 -0.992253670669146 Two 2.4559473700296097 Core
Chr1 4246265 4248760 VDAG_JR2_Chr1g13270.1 6.248190130409548 4.795125116068991 6.61160987401055 0.622445 4.4630942457663085 -0.9906494680954392 Two 3.0838627914357204 Core
Chr1 4248765 4250457 VDAG_JR2_Chr1g13280.1 5.0916531073177005 5.10219244660597 6.04896189457189 0.588061 5.9448722556334825 -0.9935159664298008 Two 2.15566304217249 Core
Chr1 4255664 4257725 VDAG_JR2_Chr1g13290.1 7.97852613268404 7.0840531422561215 6.24734574359834 0.5201359999999999 7.718524613220861 -0.9948131876678108 Two 3.82256429996539 Core
Chr1 4265986 4267437 VDAG_JR2_Chr1g13300.1 8.38445488975617 6.87226585926576 6.28590341217575 0.524466 8.129304250827467 -0.9908716143832428 Two -1.00203810642715 Core
Chr1 4283124 4285225 VDAG_JR2_Chr1g13310.1 7.3847779491357395 6.09047793562636 6.26346704226786 0.547358 5.055112725825123 -0.992584815907981 Two 3.3806596120452004 Core
Chr1 4285263 4287972 VDAG_JR2_Chr1g13320.1 6.9208949614944295 5.972818548750322 5.803763441923668 0.519011 5.334870666933509 -0.990582735340731 Two 0.623505462425183 Core
Chr1 4288112 4289537 VDAG_JR2_Chr1g13330.1 5.47932661042766 5.8136841082895705 6.19394780496938 0.540351 6.343291228959767 -0.9930868029878208 Two -0.7336750163348359 Core
Chr1 4289488 4291382 VDAG_JR2_Chr1g13340.1 6.91876963436329 5.33929324564303 6.37430456780861 0.559134 5.486047027255646 -0.99049186997239 Two 2.7288173297174705 Core
Chr1 4294866 4296130 VDAG_JR2_Chr1g13350.1 5.11811294253716 5.89909673986192 6.49237938977785 0.587816 13.430315186272436 -0.990815007369144 Two 3.3054410558465097 Core
Chr1 4297357 4300004 VDAG_JR2_Chr1g13360.1 6.666749122055808 5.98251835085889 6.23243331852075 0.562524 2.300104846279812 -0.992523629830027 Two 0.673538325317609 Core
Chr1 4301958 4303487 VDAG_JR2_Chr1g13370.1 6.29477429695269 5.18160191369104 6.429055542865338 0.622629 1.3397401140767142 -0.994073644900246 Two -1.43877397202035 Core
Chr1 4304862 4306911 VDAG_JR2_Chr1g13380.1 5.16649313032001 5.57467960768368 6.851377361472441 0.579307 1.6746833770738443 -0.988902291116669 Two -1.4941043956773898 Core
Chr1 4308370 4310685 VDAG_JR2_Chr1g13390.1 6.73479321851213 6.0381317013968 6.80522955959578 0.540821 1.8688670459626469 -0.9920072092464692 Two -0.11720755935135603 Core
Chr1 4313006 4317299 VDAG_JR2_Chr1g13400.1 6.258865342513371 5.553809617372051 6.467751235994951 0.576287 5.903537308516933 -0.992317558730806 Two 3.4511523222272498 Core
Chr1 4318081 4320883 VDAG_JR2_Chr1g13410.1 6.67194647932551 5.49790067479436 6.131773508562371 0.560314 4.236234597355269 -0.989655831207058 Two 1.9638730677354697 Core
Chr1 4323768 4332621 VDAG_JR2_Chr1g13420.1 6.10154274681832 5.3773399364224685 6.34798887978265 0.5818369999999999 5.942283654529918 -0.990824556698435 Two 5.44074996761199 Core
Chr1 4328883 4332594 VDAG_JR2_Chr1g13430.1 6.186925208841469 5.27725995612867 6.5964972962933 0.60388 0.0 -0.990605068471504 Two 3.981835455470121 Core
Chr1 4332952 4335285 VDAG_JR2_Chr1g13440.1 4.245261777353201 4.52818681093772 6.3401642065615 0.632662 1.4508996696166552 -0.988525924337708 Two -1.62595636604204 Core
Chr1 4336020 4338618 VDAG_JR2_Chr1g13450.1 5.93589899117589 5.2384750677898095 6.6262425650867405 0.626251 3.1619545206679147 -0.991397141825739 Two 0.6293348759933389 Core
Chr1 4338752 4340187 VDAG_JR2_Chr1g13460.1 1.0051419305185 5.20505270921925 6.409210558257412 0.606272 3.1701073065524623 -0.990493958309495 Three -0.993001770464244 Core
Chr1 4339995 4342837 VDAG_JR2_Chr1g13470.1 6.67701419392017 5.23882828863468 6.148743923813711 0.5524279999999999 5.097835823742728 -0.988801163497563 Two 1.4453392422483 Core
Chr1 4343277 4344241 VDAG_JR2_Chr1g13480.1 5.5691202117155 6.353521051224611 6.71891557832419 0.5466810000000001 2.288489428503369 -0.9885043611621708 Two -0.808471885623119 Core
Chr1 4345935 4352217 VDAG_JR2_Chr1g13490.1 6.46447868208288 5.56028425104016 5.849349304279912 0.5331100000000001 2.6014072577823626 -0.989909863479774 Two 1.3689170523774 Core
Chr1 4352479 4354509 VDAG_JR2_Chr1g13500.1 4.6248117344910185 4.95331608657456 6.42741885816409 0.646798 1.9341256740381931 -0.993630475124273 Two -0.18892892301335 Core
Chr1 4356072 4358059 VDAG_JR2_Chr1g13510.1 5.40180767790012 5.91201934317438 7.0105442640275095 0.571716 0.9084234490461048 -0.992681612438797 Two -2.0476241354357 Core
Chr1 4358835 4359783 VDAG_JR2_Chr1g13520.1 7.543887168387902 6.01525177247869 6.409750715047308 0.5474680000000001 3.759303867449407 -0.991094446778108 Two 0.870164745332054 Core
Chr1 4360556 4362139 VDAG_JR2_Chr1g13530.1 6.38191390155779 5.24376239659971 5.76313973585881 0.581807 1.9008334690153368 -0.9912259805270552 Two -0.581059012382887 Core
Chr1 4362392 4363480 VDAG_JR2_Chr1g13540.1 7.72254625314368 5.274554601448741 6.33703414079367 0.5726100000000001 11.08269037932151 -0.9870334009936528 Two 1.2324110418748 Core
Chr1 4363832 4366070 VDAG_JR2_Chr1g13550.1 6.59598589824185 5.46463930374226 6.19358729717718 0.55496 4.951094833192911 -0.993074607280974 Two 2.47526878672752 Core
Chr1 4365971 4366565 VDAG_JR2_Chr1g13560.1 0.685508776263926 5.373125708202361 6.161306062795321 0.560606 2.3536336312629387 -0.980200580723587 Three -1.37577160452726 Core
Chr1 4366655 4367025 VDAG_JR2_Chr1g13570.1 0.982961399201118 5.43589973848986 6.2598269474327095 0.5675680000000001 2.213250539922732 -0.994779143732204 Three -1.1803467257056202 Core
Chr1 4366762 4367502 VDAG_JR2_Chr1g13580.1 5.61026901109718 4.805868834201259 6.4088230631579695 0.5810810000000001 7.568562466011766 -0.994988897216514 Two -0.4372736712312 Core
Chr1 4367667 4368299 VDAG_JR2_Chr1g13590.1 7.080535501759631 6.87502776655486 6.47904989174475 0.5221520000000001 3.248305262582808 -0.994678850432804 One -0.4075432204529779 Core
Chr1 4368340 4368762 VDAG_JR2_Chr1g13600.1 0.8923437200532172 6.72133221766221 6.477499159058829 0.545024 2.5463505919706546 -0.9950564370558648 Three -1.86229986922014 Core
Chr1 4369188 4371183 VDAG_JR2_Chr1g13610.1 6.378916289627321 5.74623745797484 6.22452755817748 0.5779449999999999 3.048209643508663 -0.989863229346844 Two -0.6521316379297328 Core
Chr1 4371587 4375204 VDAG_JR2_Chr1g13620.1 6.10490540746056 5.42734814554937 6.18960674573214 0.567044 6.693469352374129 -0.98875943299432 Two 3.43800532130799 Core
Chr1 4375585 4376430 VDAG_JR2_Chr1g13630.1 5.6114630743152905 5.64354048321827 6.20202964953677 0.547929 1.6446970861290249 -0.989687625563862 Two -1.8952437294130304 Core
Chr1 4377507 4378630 VDAG_JR2_Chr1g13640.1 0.716750452470221 5.78648037688002 7.01313445841789 0.5512020000000001 2.331871508773585 -0.993546290396997 Three -1.44279596672804 Core
Chr1 4379617 4380415 VDAG_JR2_Chr1g13650.1 1.49112799704814 5.76601893751616 7.34391203675877 0.5513779999999999 1.0424119584324514 -0.9877164431129648 Three -3.00163935279698 Core
Chr1 4380620 4383875 VDAG_JR2_Chr1g13660.1 6.348312419364 5.88784823626464 6.27471582342291 0.569585 8.117115191162076 -0.9914207853074172 Two 2.8358205647319 Core
Chr1 4384140 4386346 VDAG_JR2_Chr1g13670.1 5.80395787805882 4.89539692066182 5.9519260828297975 0.596102 3.174913614823091 -0.98958103318432 Two 1.42350780096766 Core
Chr1 4386462 4387882 VDAG_JR2_Chr1g13680.1 5.70441366302218 5.15101318998625 6.24173202176016 0.598592 6.2106961168837564 -0.991871123535526 Two -1.6458446639579 Core
Chr1 4388081 4389770 VDAG_JR2_Chr1g13690.1 5.8819697159758695 4.84024189190187 6.20095448224883 0.597395 3.581595542533812 -0.991560695204312 Two 1.85032888476196 Core
Chr1 4389431 4393787 VDAG_JR2_Chr1g13700.1 6.46367084025496 5.300438451408 6.058393419824929 0.556474 6.374513400554969 -0.991495878394454 Two 5.88253163220587 Core
Chr1 4396378 4397632 VDAG_JR2_Chr1g13710.1 5.3794119727811305 6.22085137112422 6.567241783833048 0.563796 12.990158209540207 -0.991586124824644 Two 5.69113409329888 Core
Chr1 4397731 4400091 VDAG_JR2_Chr1g13720.1 4.996652754422179 5.570276036612031 6.5331410937140095 0.5813560000000001 6.299263256302536 -0.991315402634756 Two 3.00320864614602 Core
Chr1 4400766 4403704 VDAG_JR2_Chr1g13730.1 6.542786203005072 5.11922126907352 6.56797176645872 0.5912189999999999 10.42144497369192 -0.995559633625186 Two 5.27695838079398 Core
Chr1 4404088 4405628 VDAG_JR2_Chr1g13740.1 6.38922564116356 5.600526602842879 6.69468276574974 0.642208 4.458582049016068 -0.9904200717935192 Two 1.38750640465335 Core
Chr1 4405844 4407721 VDAG_JR2_Chr1g13750.1 5.2753380333432585 5.38860920217658 6.236954684093733 0.608418 1.1349518790889437 -0.99299738483976 Two -1.4303471570265098 Core
Chr1 4408242 4409789 VDAG_JR2_Chr1g13760.1 7.746206225860161 5.43855864950591 6.210741598049201 0.5410470000000001 1.4350459433834508 -0.9927274198061328 Two -1.20888820824564 Core
Chr1 4410544 4413372 VDAG_JR2_Chr1g13770.1 5.895184775350058 5.16046939117774 6.42631510392269 0.572489 5.1375801852819105 -0.9884936320456592 Two 2.01113254841257 Core
Chr1 4416195 4416665 VDAG_JR2_Chr1g13780.1 8.08124767870626 6.1706771875947 6.68436445914525 0.578723 0.14733948775882674 -0.988135664706925 One -6.88501115271346 Core
Chr1 4463852 4465044 VDAG_JR2_Chr1g13790.1 7.84074517254638 5.85673071571186 6.51615498078672 0.5746640000000001 4.155024405317507 -0.9932205825552608 Two 1.63204920098134 Core
Chr1 4467193 4470822 VDAG_JR2_Chr1g13800.1 6.25678935001742 5.475374410611299 6.705545347792191 0.5941029999999999 4.55594842703745 -0.990306372834299 Two 3.68524001674272 Core
Chr1 4476942 4480485 VDAG_JR2_Chr1g13810.1 5.798589141956719 5.1789261433219504 6.47948110415174 0.587638 6.478596278102957 -0.9917728594383 Two 1.95641737482796 Core
Chr1 4483105 4484058 VDAG_JR2_Chr1g13820.1 5.08680051044518 4.34990701926894 6.88745231056494 0.678909 6.6262988052063445 -0.990993496040254 Two 2.7548344114928 Core
Chr1 4484724 4485587 VDAG_JR2_Chr1g13830.1 6.7460717196922015 5.5045656764958 6.50979980023021 0.590962 5.542882304399856 -0.987175959642416 Two 1.73305190638053 Core
Chr1 4485438 4488494 VDAG_JR2_Chr1g13840.1 5.28362284112126 5.24366639539532 6.436608434754 0.597186 4.346241017771094 -0.9902724216010592 Two 3.2583516631190497 Core
Chr1 4490343 4493341 VDAG_JR2_Chr1g13850.1 4.6288884982206 4.87554829461172 6.30740281527724 0.634757 2.9813790653925363 -0.991191821754202 Two 0.7384210048335691 Core
Chr1 4493424 4497798 VDAG_JR2_Chr1g13860.1 5.58750091398653 5.4147687990485895 6.49143361567268 0.571788 3.7995335448055294 -0.99320594063908 Two 3.1322242194505203 Core
Chr1 4501620 4503208 VDAG_JR2_Chr1g13870.1 6.71708771010241 5.05297686101942 6.55509581129776 0.605793 4.7454459154902455 -0.9919636542163248 Two -0.8035499624738571 Core
Chr1 4503304 4506555 VDAG_JR2_Chr1g13880.1 5.53086475915052 4.7466051770689806 6.184009455621951 0.645647 3.104703470210038 -0.992638940741314 Two 0.104213287801459 Core
Chr1 4506519 4507605 VDAG_JR2_Chr1g13890.1 1.7350444567214298 5.26015821136241 6.494572997307451 0.585635 6.23654848003836 -0.995792866887157 Three 2.70490221299306 Core
Chr1 4508371 4510414 VDAG_JR2_Chr1g13900.1 5.70839504946816 5.1977135178132405 6.36126172439793 0.602056 4.095436196646077 -0.9904337075095492 Two -1.30588726466692 Core
Chr1 4510761 4513817 VDAG_JR2_Chr1g13910.1 0.670071233834445 5.30527129468454 6.4428992942526 0.649542 2.3218557907886765 -0.9940857533619292 Three 0.905980535964328 Core
Chr1 4513995 4517395 VDAG_JR2_Chr1g13920.1 5.484862858424388 5.59466585486907 6.42993168298592 0.585294 7.343967829319197 -0.988948909080568 Two 3.20850571731008 Core
Chr1 4518573 4521623 VDAG_JR2_Chr1g13930.1 6.380793656222769 5.41023987860374 6.23182206249329 0.562951 3.88394223035 -0.992300589311082 Two 2.6123069405907 Core
Chr1 4522503 4524110 VDAG_JR2_Chr1g13940.1 5.71390185991755 5.96545711479024 6.47280852681933 0.547604 4.9615733251436485 -0.991734443466199 Two -0.5299539258877539 Core
Chr1 4525674 4527185 VDAG_JR2_Chr1g13950.1 6.626446213288291 5.8041068832083615 6.65661638175704 0.574454 7.075136159501475 -0.989806351732838 Two 3.0823620483696 Core
Chr1 4527448 4528840 VDAG_JR2_Chr1g13960.1 4.159596940313191 5.002969526810968 6.4571490054785885 0.65158 2.3914483809013745 -0.990000400649428 Two -0.290502422718262 Core
Chr1 4529096 4531047 VDAG_JR2_Chr1g13970.1 5.27031242040982 5.22636856520891 6.339111525014499 0.621732 5.680692807114379 -0.9895508050537288 Two 2.96437850697328 Core
Chr1 4531141 4531816 VDAG_JR2_Chr1g13980.1 7.35039875775554 5.11202691235212 6.38940631714263 0.514074 7.229208858025498 -0.99194585463848 Two 1.79281032158677 Core
Chr1 4531684 4533029 VDAG_JR2_Chr1g13990.1 5.984656109784889 5.19504436549205 6.43622669342046 0.598513 6.106775476632188 -0.989619230688742 Two 1.45474801385933 Core
Chr1 4533622 4535009 VDAG_JR2_Chr1g14000.1 6.357818036736388 5.22910655920746 6.420751354274781 0.598414 5.221446553208853 -0.986726116449879 Two -0.469232115934875 Core
Chr1 4536110 4537362 VDAG_JR2_Chr1g14010.1 6.9635218459812425 5.00872122122433 6.28531013012807 0.617412 4.07754420626728 -0.990705450129558 Two 1.60467765969984 Core
Chr1 4537342 4539474 VDAG_JR2_Chr1g14020.1 5.93456711131542 5.5366900584209695 6.4456989513890806 0.580206 7.449265562289147 -0.99270509305411 Two 2.0125803202197097 Core
Chr1 4539723 4542867 VDAG_JR2_Chr1g14030.1 4.1427037287137205 5.80173847378922 5.8477764965823695 0.535623 6.3523906959555685 -0.989110072309934 Two 0.0661257151819136 Core
Chr1 4542676 4544222 VDAG_JR2_Chr1g14040.1 5.21818694056727 3.95453948927183 6.19491915493173 0.576973 6.346147091522558 -0.990282508089982 Two 0.6328632286337671 Core
Chr1 4544368 4546330 VDAG_JR2_Chr1g14050.1 5.674972393277299 5.49244709069293 6.2980229946298385 0.573904 4.330044256428893 -0.990120269273341 Two 2.34028002438685 Core
Chr1 4546411 4548794 VDAG_JR2_Chr1g14060.1 6.01863994556914 5.4700420359039414 6.67427254350906 0.577843 5.812505163153546 -0.99125012812199 Two 1.90070391883878 Core
Chr1 4549341 4551705 VDAG_JR2_Chr1g14070.1 5.5640815100989816 4.97432752906577 6.79145925162047 0.571489 6.3318480399157036 -0.990654574343856 Two 4.7566194592924695 Core
Chr1 4551927 4553135 VDAG_JR2_Chr1g14080.1 3.99593301639352 5.85826355993672 6.17537153667846 0.5960260000000001 4.498604861101733 -0.990564419990389 Two 1.83687557482502 Core
Chr1 4553474 4554997 VDAG_JR2_Chr1g14090.1 6.528824621210233 5.946509686013429 6.04901173256023 0.521996 0.2979590551328291 -0.993735347315424 Two -4.17619172759309 Core
Chr1 4555472 4558531 VDAG_JR2_Chr1g14100.1 6.496565458718469 4.95630084732804 6.1580275511377405 0.594639 3.048560926376828 -0.9890642572052472 Two 0.7759468657372671 Core
Chr1 4559212 4562497 VDAG_JR2_Chr1g14110.1 6.027534751176361 5.31938209263844 6.362119631963051 0.5710810000000001 7.548130612642993 -0.987772935751822 Two 6.558309449472281 Core
Chr1 4565074 4565546 VDAG_JR2_Chr1g14120.1 6.79741152142538 5.93771453502843 6.40190844883083 0.563559 2.7924277345532484 -0.993858249383804 Two -2.56390589245612 Core
Chr1 4565752 4567498 VDAG_JR2_Chr1g14130.1 6.101573686119809 4.833865126775 6.45600305582479 0.646621 4.342422445365725 -0.9903544384867892 Two 2.37591889540409 Core
Chr1 4567855 4570131 VDAG_JR2_Chr1g14140.1 5.283214898206559 5.13127091632379 6.45716841891526 0.588313 3.012586452549455 -0.989253618536004 Two -1.50363477527548 Core
Chr1 4570463 4572256 VDAG_JR2_Chr1g14150.1 4.0281222949017 5.244074727455058 6.80931125903222 0.643614 2.690283038277664 -0.989244640113603 Two 0.728720912975927 Core
Chr1 4572033 4576830 VDAG_JR2_Chr1g14160.1 6.35568721393041 5.18958710714845 6.4653776230063 0.6093390000000001 1.7079658353789955 -0.992303389356771 Two -0.224475588364106 Core
Chr1 4577224 4579491 VDAG_JR2_Chr1g14170.1 5.1596528229842304 5.06837249836289 6.5480796941638495 0.6572560000000001 3.2379506336126163 -0.990494118912814 Two 1.55382294268301 Core
Chr1 4579636 4581677 VDAG_JR2_Chr1g14180.1 5.33903007260931 4.9570306015118 6.2607220564178805 0.598236 1.0358982386277824 -0.986675485312702 Two -1.63369469104059 Core
Chr1 4582033 4584333 VDAG_JR2_Chr1g14190.1 5.7906121316915 5.1143423628941695 6.17445782337038 0.603043 8.067757436989138 -0.989331062606182 Two 1.40612188805971 Core
Chr1 4585076 4586502 VDAG_JR2_Chr1g14200.1 7.21642811678344 5.73758895650386 6.89119387818808 0.56662 0.6095828023115689 -0.9897362303185572 Two -3.19843101007648 Core
Chr1 4589503 4592821 VDAG_JR2_Chr1g14210.1 6.5628581518504285 5.3997091958113215 6.12578839546697 0.555154 1.2171339008451594 -0.984591932138283 Two -1.4776203797465302 Core
Chr1 4595120 4598277 VDAG_JR2_Chr1g14220.1 6.1644798253459285 5.32704018229336 6.48827720051256 0.5707949999999999 4.822313010072388 -0.9922407120380908 Two 2.77937555966792 Core
Chr1 4598330 4599935 VDAG_JR2_Chr1g14230.1 4.16057573795092 4.82018967899245 6.4773661639029685 0.633645 4.243373164205603 -0.9914220777936692 Two 2.13924759324111 Core
Chr1 4600120 4602966 VDAG_JR2_Chr1g14240.1 5.8799787229474285 5.30951966918952 6.40512868543428 0.584329 5.196970397100815 -0.993181853874722 Two 3.9820459877269103 Core
Chr1 4603100 4604799 VDAG_JR2_Chr1g14250.1 5.6039576087485 5.68158604772367 6.339570165600129 0.5903470000000001 2.6539511542743752 -0.9912624771212758 Two -0.4222893459155721 Core
Chr1 4604829 4612064 VDAG_JR2_Chr1g14260.1 4.61597380102318 6.00549167611352 6.091650861748049 0.558535 0.5690275959587684 -0.991853032548747 Two -0.8788771869458729 Core
Chr1 4613876 4615391 VDAG_JR2_Chr1g14270.1 6.619174926886539 5.633143206498881 6.08381996097629 0.555776 8.624564112741497 -0.994314494943638 Two 4.6818013186043 Core
Chr1 4615495 4616796 VDAG_JR2_Chr1g14280.1 7.0053192252207985 6.024814200221193 6.02652464509689 0.5495770000000001 9.912527566082039 -0.9944248497456528 Two -2.3474245918712 Core
Chr1 4617036 4619297 VDAG_JR2_Chr1g14290.1 5.1697882946813305 5.4927452168748605 6.916965426399339 0.568333 1.7775227001158502 -0.9876174565356328 Two -0.29741053982672 Core
Chr1 4620598 4624118 VDAG_JR2_Chr1g14300.1 5.93428544286667 5.89277432750126 6.14684016739417 0.573295 8.128005891928307 -0.993730384468638 Two 3.24882316445886 Core
Chr1 4624082 4627218 VDAG_JR2_Chr1g14310.1 6.05151276466054 5.0139594965428085 6.27376668507014 0.611926 5.180957204355078 -0.9849289745791252 Two 3.15531596997351 Core
Chr1 4627299 4629797 VDAG_JR2_Chr1g14320.1 3.3787375106298305 5.25502359918758 6.42010062547248 0.60048 5.040606497603672 -0.991586434265682 Two 2.71432532189508 Core
Chr1 4629377 4631462 VDAG_JR2_Chr1g14330.1 5.42994136420896 5.52623489797158 6.21607143908867 0.589928 2.3157664146009505 -0.993624024060688 Two 0.38694861304928296 Core
Chr1 4631554 4633003 VDAG_JR2_Chr1g14340.1 6.47608097835877 5.64802303830279 6.86971388037343 0.556246 2.270996033643085 -0.9928638187183708 Two 0.044979329843214 Core
Chr1 4632866 4635257 VDAG_JR2_Chr1g14350.1 6.22387183465319 5.747182635958249 6.205565463032548 0.590966 6.271484366301662 -0.9918787413788102 Two -1.6260837474247398 Core
Chr1 4635314 4637538 VDAG_JR2_Chr1g14360.1 4.87924313635809 4.6840784824492685 6.1263027882418895 0.602518 1.5699173750928788 -0.992078887270548 Two -0.4805285076272021 Core
Chr1 4638328 4639750 VDAG_JR2_Chr1g14370.1 6.85291358167392 5.667262790346661 6.56360528116251 0.588608 2.560625730296448 -0.9920392848176592 Two 0.108897342291924 Core
Chr1 4639857 4641794 VDAG_JR2_Chr1g14380.1 7.65077844087681 4.86044264387312 6.6778116487664905 0.643263 3.0154383281960517 -0.992882009863704 Two -1.43663976267478 Core
Chr1 4642145 4644398 VDAG_JR2_Chr1g14390.1 5.12921174941602 5.608610364020599 6.5174233819853615 0.596982 6.972762506651106 -0.991196341615769 Two 3.0355046307358395 Core
Chr1 4644637 4645869 VDAG_JR2_Chr1g14400.1 1.30238508431423 5.125173933132 6.10209226632573 0.578734 10.486877418957727 -0.9893991178752072 Three 2.4215511495745496 Core
Chr1 4646561 4648576 VDAG_JR2_Chr1g14410.1 7.232335777550981 6.02813846231418 5.94437153228819 0.546898 2.341325567013364 -0.989129422856156 Two 0.377647051467828 Core
Chr1 4648557 4651197 VDAG_JR2_Chr1g14420.1 6.9175490647269 5.412122946522441 6.1961189495061095 0.597349 1.7181831136253831 -0.9932728300528828 Two -0.0786546478246211 Core
Chr1 4653090 4658106 VDAG_JR2_Chr1g14430.1 5.837561118997871 5.60363229020312 6.45415814686428 0.5693779999999999 4.090430491105439 -0.98942340212587 Two 2.6858664324186003 Core
Chr1 4658625 4660536 VDAG_JR2_Chr1g14440.1 0.6481971279187622 5.545629832614781 7.08946546094936 0.585034 1.7024665993680614 -0.992657090442387 Three 0.18825999583603095 Core
Chr1 4658661 4663399 VDAG_JR2_Chr1g14450.1 3.47798210079064 5.36094163972203 6.68513734470779 0.5977210000000001 6.710494074909833 -0.99190593954773 Two 3.2157961600622498 Core
Chr1 4663413 4665587 VDAG_JR2_Chr1g14460.1 6.48782531319487 5.12469848701189 6.26418842144589 0.591536 2.1791434298276493 -0.98860471906565 Two -0.702085600051057 Core
Chr1 4667030 4669428 VDAG_JR2_Chr1g14470.1 5.36560379902178 5.24564568814941 6.36955104884812 0.6472060000000001 1.2962224273457619 -0.992799368092218 Two -1.0152457190032098 Core
Chr1 4670110 4674072 VDAG_JR2_Chr1g14480.1 4.86686044273748 5.300246095941139 6.08892575074206 0.592882 3.8936579133004408 -0.9919006381469642 Two 3.08633241990408 Core
Chr1 4676584 4680894 VDAG_JR2_Chr1g14490.1 5.78322157270823 5.38708902639113 6.17878676619725 0.561485 2.603673144664114 -0.9898505801811692 Two -0.0855189865072515 Core
Chr1 4681303 4682886 VDAG_JR2_Chr1g14500.1 5.931409610451532 5.86496300875438 6.91532239089107 0.598863 0.3960766817630978 -0.993396185764624 Two -3.68165712038764 Core
Chr1 4682753 4683896 VDAG_JR2_Chr1g14510.1 6.69235880461664 5.27923275097855 6.748922894015889 0.570429 0.2845081112393316 -0.994270464904355 Two -4.99348716490779 Core
Chr1 4684531 4689369 VDAG_JR2_Chr1g14520.1 5.7415071500530805 5.3370136382346915 6.157588176688289 0.565316 1.7326984833759314 -0.991544964368359 Two -0.195496647421555 Core
Chr1 4693539 4696526 VDAG_JR2_Chr1g14530.1 5.82072274244577 7.22306461679163 5.986539970485341 0.570807 0.09316851033479764 -0.99123724807939 One -15.987479 
Chr1 4699674 4700691 VDAG_JR2_Chr1g14540.1 5.3501607564147315 6.1648479152071705 6.24618642512958 0.5732550000000001 3.9126169075357775 -0.995470341519486 Two 1.30579181680582 Core
Chr1 4700667 4703153 VDAG_JR2_Chr1g14550.1 6.63509044856492 5.59182756331209 6.4654592955695405 0.5643600000000001 6.598010946720376 -0.9912967033087848 Two 2.13041997688524 Core
Chr1 4703326 4704980 VDAG_JR2_Chr1g14560.1 1.94103670970245 5.009440887830469 6.2396872022063 0.606409 7.741835294616142 -0.9904063016540172 Three 3.3388164974274503 Core
Chr1 4705012 4709088 VDAG_JR2_Chr1g14570.1 6.2393478393207005 5.30517890752295 6.3854246263224015 0.568449 7.208071211485826 -0.9922419824043208 Two 3.69796725230328 Core
Chr1 4711150 4712860 VDAG_JR2_Chr1g14580.1 7.1054567036308 5.224353432280823 6.227454493503388 0.5771930000000001 5.442543120028208 -0.990544099775746 Two 1.61824046702741 Core
Chr1 4712999 4713752 VDAG_JR2_Chr1g14590.1 5.1516860681659296 5.6926634251183605 6.605003876056322 0.504648 5.228674868214278 -0.998263904675107 Two 1.05532555437153 Core
Chr1 4713863 4714571 VDAG_JR2_Chr1g14600.1 6.051413651008589 5.9721145439716 6.428215256063808 0.569209 1.56820266132176 -0.9885043611621708 Two -2.46449146485899 Core
Chr1 4715517 4716825 VDAG_JR2_Chr1g14610.1 7.034583312010901 4.8707227523085495 6.1925966010919495 0.587156 3.3446778661657404 -0.9908993038933248 Two -1.5089580625819998 Core
Chr1 4717147 4720544 VDAG_JR2_Chr1g14620.1 5.88962910252244 4.6147994804918095 6.55104719254415 0.5890489999999999 6.947919487944827 -0.991019050673288 Two 6.0160870734198895 Core
Chr1 4724242 4726312 VDAG_JR2_Chr1g14630.1 7.08295331947801 6.0928630112962106 6.09435061029871 0.548309 3.015547186386213 -0.992253551830681 Two 0.30088995850684097 Core
Chr1 4725945 4727134 VDAG_JR2_Chr1g14640.1 7.00366058176312 5.694121285537139 6.12988633013313 0.619008 1.68425119970894 -0.9843935036823142 Two -2.04619407936222 Core
Chr1 4726851 4728392 VDAG_JR2_Chr1g14650.1 5.69054602684313 5.53391129620021 6.181878681041911 0.55743 5.3869029190862845 -0.982243529195842 Two -0.6879714493918629 Core
Chr1 4728703 4730158 VDAG_JR2_Chr1g14660.1 6.32133499459707 4.90897684523605 5.961004361335031 0.568385 6.278692130473035 -0.9842731269208828 Two 1.26810849015877 Core
Chr1 4732515 4734839 VDAG_JR2_Chr1g14670.1 5.84777164681146 5.58403962842923 6.161602031796512 0.607143 7.520352510128458 -0.990057006403384 Two 3.6245988551548303 Core
Chr1 4735342 4738449 VDAG_JR2_Chr1g14680.1 7.1289334573285315 5.74041022738851 6.35137847284846 0.568072 5.115939110517242 -0.992372609913679 Two 0.5955812681521611 Core
Chr1 4739504 4742094 VDAG_JR2_Chr1g14690.1 5.95007519372437 5.454799480709863 6.268609245294219 0.59305 2.1225189232178416 -0.991843398536713 Two 0.4798803115102 Core
Chr1 4742271 4744715 VDAG_JR2_Chr1g14700.1 6.32890951981899 5.06236042149873 6.38238728700797 0.585925 1.0714424944203371 -0.989886133259622 Two -3.1069985597394503 Core
Chr1 4745582 4745967 VDAG_JR2_Chr1g14710.1 8.02246957488533 7.36494179751263 6.35470253348053 0.52987 1.4927319715886154 -0.995498607765059 One -3.08605918708229 Core
Chr1 4746536 4752923 VDAG_JR2_Chr1g14720.1 6.09300202311466 5.396607725673031 6.20451903185449 0.5641149999999999 0.5161646440880325 -0.9903531907805028 Two -1.70505773850416 Core
Chr1 4753102 4755555 VDAG_JR2_Chr1g14730.1 6.03049968765241 4.95580023906692 6.65494777103824 0.593151 9.538649820380758 -0.989460455777466 Two 2.35715031597936 Core
Chr1 4758252 4759778 VDAG_JR2_Chr1g14740.1 5.74952960581335 6.08424721248316 6.3467552928153 0.585845 4.412473301309876 -0.98894951587255 Two -0.169163670028487 Core
Chr1 4760043 4761208 VDAG_JR2_Chr1g14750.1 7.486471965225849 5.83144832447493 5.8070939912748205 0.524464 0.6782358908733929 -0.99170181336998 Two -3.80588197852621 Core
Chr1 4761863 4765462 VDAG_JR2_Chr1g14760.1 4.24566435856035 4.8665664290944015 6.38417368005303 0.599055 2.092517410630612 -0.9887712379518442 Two 0.862456707517024 Core
Chr1 4767647 4769948 VDAG_JR2_Chr1g14770.1 4.179160415095581 5.51437852282647 6.101745342226138 0.554976 3.6774057676285214 -0.99386575725997 Two 0.8943095033700609 Core
Chr1 4770013 4771039 VDAG_JR2_Chr1g14780.1 5.89379556055004 5.23818889751145 6.51515077599442 0.631579 5.593968319492644 -0.98983592327408 Two -1.01600233410652 Core
Chr1 4772505 4774584 VDAG_JR2_Chr1g14790.1 6.86936190202868 6.07152115787197 6.513334981115492 0.5613279999999999 5.534670078899146 -0.9956131274503242 Two 2.89320135840213 Core
Chr1 4776983 4782178 VDAG_JR2_Chr1g14800.1 5.14678588862535 5.537257598143951 6.32908654268142 0.566121 4.405887408407459 -0.9925740788292132 Two 4.05320131456156 Core
Chr1 4782068 4784522 VDAG_JR2_Chr1g14810.1 1.30587615706483 5.847505510768159 6.413506526287169 0.58965 6.5538598976801214 -0.988364361148453 Three 0.993300697291445 Core
Chr1 4784338 4785392 VDAG_JR2_Chr1g14820.1 0.4252450688884679 5.81177663895255 6.48517814312876 0.513283 2.894002437486252 -0.994645109691755 Three -1.28711933623118 Core
Chr1 4785890 4788616 VDAG_JR2_Chr1g14830.1 1.0428844048999202 5.5659048497619805 6.14351873737762 0.568599 6.323069798765168 -0.989741129775856 Three 2.630567419447 Core
Chr1 4788668 4791280 VDAG_JR2_Chr1g14840.1 5.03629930621211 5.6399726195280095 6.89524285900203 0.557044 4.227650832797461 -0.9915546476259772 Two 2.67468000754811 Core
Chr1 4791664 4792881 VDAG_JR2_Chr1g14850.1 4.7457317555233605 5.22276473482738 6.80071503685081 0.6072310000000001 6.080599408359897 -0.989665853729678 Two 3.60158295079036 Core
Chr1 4793243 4795553 VDAG_JR2_Chr1g14860.1 5.46498589061768 5.08351584175567 6.66481734727874 0.6056279999999999 6.392981358606652 -0.9889504562684458 Two 1.7236084683096695 Core
Chr1 4796927 4798379 VDAG_JR2_Chr1g14870.1 7.86212627544177 5.0696272174970005 6.174837319504911 0.604683 5.117286768981368 -0.983017496926282 Two 2.9205112757264 Core
Chr1 4798694 4799913 VDAG_JR2_Chr1g14880.1 0.671565445444951 4.790871075506121 6.3690321176786515 0.647252 4.669401620545688 -0.9909560930487852 Three 1.1933819710804598 Core
Chr1 4799955 4801449 VDAG_JR2_Chr1g14890.1 6.51489351173916 4.93956253858805 6.13351866353009 0.5763050000000001 5.3984750561065695 -0.985588941918207 Two -1.91728665833742 Core
Chr1 4801895 4804233 VDAG_JR2_Chr1g14900.1 4.51032755448598 5.515331621658441 6.19449052183526 0.6065010000000001 4.50241069956179 -0.990726446227184 Two 0.546780761685566 Core
Chr1 4804895 4807032 VDAG_JR2_Chr1g14910.1 5.093330557029732 5.30629789572922 6.24124571360597 0.656996 2.3820078631025963 -0.9887138981583892 Two 0.445986221573806 Core
Chr1 4807217 4810673 VDAG_JR2_Chr1g14920.1 5.80173373553609 5.0924431577282 6.425488169015432 0.584491 6.5559442775310375 -0.990745264198032 Two 4.68113823502408 Core
Chr1 4812613 4814461 VDAG_JR2_Chr1g14930.1 7.441577308224139 4.87776294800288 6.12876310043509 0.563312 6.402928973278187 -0.990495523960407 Two 3.60008239895706 Core
Chr1 4815363 4816149 VDAG_JR2_Chr1g14940.1 5.978593157737089 6.6104598605873885 6.66828663629604 0.526718 3.858694151923391 -0.989185880916588 One -1.70937955413573 Core
Chr1 4816147 4817262 VDAG_JR2_Chr1g14950.1 7.01120886856484 6.05818410706602 6.61293404211512 0.557848 7.203604358586498 -0.993825832056465 Two 3.70379395369274 Core
Chr1 4817376 4818635 VDAG_JR2_Chr1g14960.1 6.69682813005438 5.24009063353611 6.374904636760559 0.550437 6.090164215683208 -0.991773325314376 Two 1.82687634886048 Core
Chr1 4818814 4820015 VDAG_JR2_Chr1g14970.1 3.8315802613149 5.611941186540951 6.35590959609993 0.601166 6.892209069987812 -0.991458858669678 Two 3.559880804770509 Core
Chr1 4819959 4821600 VDAG_JR2_Chr1g14980.1 0.526425088199098 5.35547654863117 6.28112532875446 0.596587 4.582237224272999 -0.9915410790762952 Three 0.17017654935287194 Core
Chr1 4821922 4823499 VDAG_JR2_Chr1g14990.1 6.840969738209632 5.805323899220929 6.44579358535149 0.568167 6.830811920866648 -0.9906681754786948 Two 0.9463937118870992 Core
Chr1 4824737 4826736 VDAG_JR2_Chr1g15000.1 4.51540338196334 5.3747609119808315 6.25224669634826 0.555778 2.518574048683305 -0.991170957247777 Two 0.904507296124621 Core
Chr1 4826609 4827785 VDAG_JR2_Chr1g15010.1 4.67688993404118 5.495226775253428 6.165429791393597 0.555272 4.239869754782303 -0.994786062120837 Two 1.86875876078362 Core
Chr1 4829215 4829810 VDAG_JR2_Chr1g15020.1 8.71424639657589 6.2193015245666095 6.151416792056709 0.559664 2.3958235171170563 -0.984829565358647 One -1.5065874731695 Core
Chr1 4829990 4831008 VDAG_JR2_Chr1g15030.1 6.4645229861474505 6.378074177409941 6.27936928713285 0.55501 5.6143179938549626 -0.9852980624288292 Two -1.24569386793671 Core
Chr1 4832367 4834970 VDAG_JR2_Chr1g15040.1 6.48251551321685 4.85188624915308 6.152826612168701 0.593162 5.047513332656735 -0.9899125389583492 Two 0.16909967799695902 Core
Chr1 4834639 4836684 VDAG_JR2_Chr1g15050.1 6.43779514436959 5.252139690795981 6.35180119880643 0.5975550000000001 6.1230531231864855 -0.986550813076416 Two 1.74000962930917 Core
Chr1 4837176 4839464 VDAG_JR2_Chr1g15060.1 6.062876658781098 4.613368872936019 6.24325039952087 0.638549 3.799977018063698 -0.9905919207448391 Two -0.231660599331328 Core
Chr1 4840121 4841795 VDAG_JR2_Chr1g15070.1 6.62921353209612 5.28451919529323 6.75984660503204 0.5919949999999999 3.1223157331379783 -0.988358593564604 Two 0.897132321940279 Core
Chr1 4841842 4843494 VDAG_JR2_Chr1g15080.1 5.3660760582177405 5.24472533761394 7.24427114260455 0.571429 1.2712921896286815 -0.990833386952144 Two -8.793674348646631 Core
Chr1 4843872 4846436 VDAG_JR2_Chr1g15090.1 5.720186206527951 5.01046067170353 6.31603057889809 0.597504 4.284578894633288 -0.991016254419674 Two 1.91217394125795 Core
Chr1 4847827 4848702 VDAG_JR2_Chr1g15100.1 1.6157171139434 4.23892744798871 6.58964090606182 0.7177140000000001 3.572403129152012 -0.991672732777389 Three 0.811256500772582 Core
Chr1 4848368 4854725 VDAG_JR2_Chr1g15110.1 6.1934325398694 5.1900230652839605 6.3011575031301 0.57417 2.5598482432728376 -0.992687935317347 Two 1.40327354698778 Core
Chr1 4858359 4859049 VDAG_JR2_Chr1g15120.1 5.83363681584754 5.489416655117871 6.97930960154835 0.581159 1.059705064803565 -0.991298556005045 Two -4.3707784465916095 Core
Chr1 4859272 4859800 VDAG_JR2_Chr1g15130.1 6.7050061684612 5.81508202981805 6.54747578715195 0.558712 1.1503604686955449 -0.991795077178277 Two -3.53832294237189 Core
Chr1 4862517 4864471 VDAG_JR2_Chr1g15140.1 6.8255892085683 5.51621090721563 6.18309963937713 0.576254 3.7382530545841695 -0.990124456830332 Two -0.5300397380993189 Core
Chr1 4864687 4867564 VDAG_JR2_Chr1g15150.1 6.729494878685889 5.76440472890726 6.40378138016281 0.54814 5.465651320522999 -0.99270443430948 Two 3.350156031961649 Core
Chr1 4867770 4869214 VDAG_JR2_Chr1g15160.1 7.42959853883936 6.252702878978339 6.04027773364252 0.5630189999999999 5.356293301635918 -0.99223311695631 Two 2.21168429793985 Core
Chr1 4869538 4871372 VDAG_JR2_Chr1g15170.1 4.82700840035297 5.0666667266689 6.06839851226162 0.603599 4.073299502157613 -0.991766862848294 Two 1.29883489132771 Core
Chr1 4871236 4872086 VDAG_JR2_Chr1g15180.1 6.56896043239107 5.1671689146947415 6.23021008479459 0.5847060000000001 4.949372943130436 -0.994842907677888 Two -0.34901588229562297 Core
Chr1 4873355 4876521 VDAG_JR2_Chr1g15190.1 5.46768461370729 5.62556490567594 6.268373151540412 0.574542 5.139859243090377 -0.990144405430491 Two 0.805973807459922 Core
Chr1 4877269 4878395 VDAG_JR2_Chr1g15200.1 4.90107322397393 6.741783095579691 6.055379974294442 0.566607 1.5378989823136509 -0.992999798046267 Two -2.74105369654082 Core
Chr1 4888046 4888835 VDAG_JR2_Chr1g15210.1 6.84006317301723 6.136072573885372 6.48198403373435 0.6185039999999999 3.753334572244577 -0.992620469634403 Two -1.73562051054479 Core
Chr1 4888672 4889108 VDAG_JR2_Chr1g15220.1 2.10928944002425 5.5124314088376 6.62256188387949 0.559633 4.448566399229568 -0.984487000628676 Three 0.548384463635035 Core
Chr1 4889387 4892387 VDAG_JR2_Chr1g15230.1 6.034620218737071 4.78934449488965 6.45183178712927 0.563667 7.424566556017928 -0.99198500693588 Two -3.7642236060483 Core
Chr1 4894023 4896963 VDAG_JR2_Chr1g15240.1 5.94743745111877 5.85880523876992 6.34357992163342 0.552041 5.757914132839142 -0.9914739391735742 Two 1.43874302172629 Core
Chr1 4897597 4903836 VDAG_JR2_Chr1g15250.1 5.77458057415206 5.37576523573738 6.59988684721759 0.584068 2.4089344621968163 -0.990683057305674 Two -0.3870769605742821 Core
Chr1 4913319 4915414 VDAG_JR2_Chr1g15260.1 6.17447792285278 5.32578102223386 6.36556317227394 0.5713600000000001 6.15294609562463 -0.9906200285624972 Two 4.58482180122321 Core
Chr1 4915286 4916077 VDAG_JR2_Chr1g15270.1 0.5427815621596429 5.9038848864637385 5.29906443506876 0.484197 5.807050548214265 -0.997877608972296 Three 1.87003565528798 Core
Chr1 4917188 4920520 VDAG_JR2_Chr1g15280.1 5.88297927508562 5.48712258129194 6.62768915013553 0.552821 0.5044696805144108 -0.9892926304441628 Two -2.11693382190766 Core
Chr1 4922795 4926768 VDAG_JR2_Chr1g15290.1 4.63382376907332 5.52729419264907 6.26923978948559 0.591241 4.249022632936821 -0.986276628575838 Two 2.51547349965562 Core
Chr1 4926965 4928903 VDAG_JR2_Chr1g15300.1 0.803840047360861 5.18119031544896 6.412611186359709 0.595459 4.244575724363839 -0.9898864286781752 Three 0.00625362092177156 Core
Chr1 4929209 4930114 VDAG_JR2_Chr1g15310.1 0.8467774332803921 3.88260164978244 6.591546504964922 0.59116 7.8703189258133825 -0.989661143874318 Three 0.0649770790309503 Core
Chr1 4930412 4930660 VDAG_JR2_Chr1g15320.1 3.96060667503652 6.51434506028328 7.30207184954208 0.592742 0.0 -0.992102014722674 Two -15.38447 
Chr1 4930950 4935698 VDAG_JR2_Chr1g15330.1 6.01555473718925 5.07666691329627 6.23028509985342 0.622157 5.284518649213877 -0.989846668993067 Two 2.9695569287552 Core
Chr1 4935732 4937338 VDAG_JR2_Chr1g15340.1 0.744099657261357 5.775473697187481 6.49140419292713 0.628892 4.571913167680647 -0.9913881550529192 Three 1.55073360447394 Core
Chr1 4938065 4938843 VDAG_JR2_Chr1g15350.1 6.02433581728157 6.1399333705379116 6.765964173223059 0.5706939999999999 4.286090610559503 -0.989338705469212 Two 1.37994932633099 Core
Chr1 4938757 4940439 VDAG_JR2_Chr1g15360.1 1.19463235818133 5.67321102320965 6.3039450270828485 0.612366 2.657962999817656 -0.991781108075942 Three -1.13109024613103 Core
Chr1 4940583 4944907 VDAG_JR2_Chr1g15370.1 6.548190968972138 5.5972794382804585 6.17595327711361 0.5571229999999999 2.1993332238007355 -0.993677790579706 Two 1.25472823678731 Core
Chr1 4946124 4948095 VDAG_JR2_Chr1g15380.1 6.383553655635871 5.17508683596104 6.50009623083602 0.606291 2.2330837110403468 -0.991272576318458 Two 0.179267705285573 Core
Chr1 4949273 4952941 VDAG_JR2_Chr1g15390.1 4.64586988140493 5.652702503732081 6.37835811583663 0.575518 4.415558071110683 -0.99165712686736 Two 1.70109404817776 Core
Chr1 4953198 4955434 VDAG_JR2_Chr1g15400.1 5.985799792992999 5.67949152452461 6.4236425471788 0.557692 5.66296584722596 -0.9912739953281 Two 0.692016098737289 Core
Chr1 4955552 4960077 VDAG_JR2_Chr1g15410.1 6.69383152823441 5.47070605905721 6.4187993913861705 0.581436 1.858393999715088 -0.9925651220636992 Two 0.8965418932174921 Core
Chr1 4963521 4967099 VDAG_JR2_Chr1g15420.1 4.88150720713739 5.76019828480616 6.538479471502018 0.556736 4.368939251550805 -0.991521123942675 Two 3.45550270031156 Core
Chr1 4969100 4970680 VDAG_JR2_Chr1g15430.1 6.86679984730785 5.75343126139434 6.454025019704419 0.525316 1.2342113034624616 -0.9915942093461968 Two -1.56019412394131 Core
Chr1 4975051 4977415 VDAG_JR2_Chr1g15440.1 7.550468192577468 5.7310680399083616 6.62773893875562 0.5478 6.2377410298711204 -0.988379616899976 Two 2.93110760869185 Core
Chr1 4977821 4983410 VDAG_JR2_Chr1g15450.1 6.0564103197657095 5.29364982441065 6.04760988191289 0.5557340000000001 4.042523559448971 -0.98974905247095 Two 3.71403601960898 Core
Chr1 4983508 4984512 VDAG_JR2_Chr1g15460.1 0.443471207392016 6.023588985269767 6.33777188583764 0.545817 6.831321355084849 -0.989458840218414 Three 0.462033464448144 Core
Chr1 4984810 4986561 VDAG_JR2_Chr1g15470.1 6.6325690490278495 4.70701580517976 6.51481945070496 0.644774 4.657745775338852 -0.991379244880385 Two -0.7143311506463159 Core
Chr1 4986939 4989044 VDAG_JR2_Chr1g15480.1 5.60126700808921 5.855225163790362 6.438854689397099 0.559145 2.840862525659551 -0.993304672014712 Two -0.8003224061797991 Core
Chr1 4991853 4995762 VDAG_JR2_Chr1g15490.1 6.160368926387018 5.47860340000408 6.60378021459071 0.585572 4.331380690829834 -0.992175573064494 Two 3.5452134944311 Core
Chr1 4996248 4997171 VDAG_JR2_Chr1g15500.1 6.62736517921718 6.076234793878161 7.22384046768636 0.562297 0.5179962136873311 -0.98858621387791 Two -4.184200048033141 Core
Chr1 4997585 5000674 VDAG_JR2_Chr1g15510.1 5.98512560717715 5.139974873477179 6.471152037582951 0.596957 4.554290313111603 -0.989884655907942 Two 1.03427027082048 Core
Chr1 5001186 5004780 VDAG_JR2_Chr1g15520.1 5.17736695972718 4.77947073559485 6.29729147924891 0.61241 2.374467148011552 -0.9915023431034772 Two 1.16590722833441 Core
Chr1 5005904 5007193 VDAG_JR2_Chr1g15530.1 6.7064223079258 5.90852415649071 6.64284263719676 0.59969 5.239346329237345 -0.991790408190934 Two -1.5873820261257698 Core
Chr1 5010562 5013200 VDAG_JR2_Chr1g15540.1 5.85400021555514 5.30145230990853 6.72920959433414 0.5879449999999999 5.146436620506523 -0.9907012566200848 Two 3.77838504445452 Core
Chr1 5013656 5014945 VDAG_JR2_Chr1g15550.1 4.88708677802193 5.074167304700451 6.70857080385879 0.65322 6.017161818400052 -0.989963820111422 Two 2.89766773748634 Core
Chr1 5014735 5015782 VDAG_JR2_Chr1g15560.1 6.10817349118572 5.84799200430125 6.0077443311647 0.516714 5.4515598469287525 -0.9961408045443648 Two 3.30440022909537 Core
Chr1 5016051 5019567 VDAG_JR2_Chr1g15570.1 3.07019639823886 5.634330730228091 6.539816386512362 0.600114 2.887916425468815 -0.992721897773152 Two -5.0813224002235 Core
Chr1 5024991 5026687 VDAG_JR2_Chr1g15580.1 5.184448758843558 5.8440644688455485 6.74686776053893 0.574882 3.9555527239229016 -0.990775154424041 Two 0.972562714265851 Core
Chr1 5026907 5029169 VDAG_JR2_Chr1g15590.1 5.394064782499112 6.0150364642593805 6.40798690466478 0.576923 3.2951478957682467 -0.9934821659663592 Two -0.76702518606701 Core
Chr1 5029927 5032207 VDAG_JR2_Chr1g15600.1 6.630711072967171 5.374094372722388 6.368278473229611 0.583333 1.4479182027430302 -0.99321451877515 Two -6.544398222040041 Core
Chr1 5032274 5035708 VDAG_JR2_Chr1g15610.1 6.30506376168459 5.55881359617159 6.25110629747936 0.570763 4.090134133293061 -0.991228362068105 Two 2.12560536825084 Core
Chr1 5035917 5037787 VDAG_JR2_Chr1g15620.1 6.221391212472731 5.261372670937731 6.523443118846152 0.602139 4.742509326368523 -0.9903072821829658 Two 0.246377451460128 Core
Chr1 5037615 5048491 VDAG_JR2_Chr1g15630.1 6.198137047638039 5.39021489471061 6.277788620163308 0.568499 3.6240389017405645 -0.9924958654416328 Two 2.45324001997141 Core
Chr1 5050749 5052224 VDAG_JR2_Chr1g15640.1 7.3673824148244 4.99192063816502 6.2583249569411095 0.559322 7.952166771901691 -0.9930065971712552 Two 1.27222880936365 Core
Chr1 5052434 5053244 VDAG_JR2_Chr1g15650.1 8.262094294116372 6.60181103441203 5.957378960599001 0.477778 3.239101172231924 -0.9934613903703752 One -0.00375504231560532 Core
Chr1 5057795 5059044 VDAG_JR2_Chr1g15660.1 6.12017706248342 6.327449324783701 6.50451500679733 0.513211 3.609412394853009 -0.990686624644749 Two -2.94724134666187 Core
Chr1 5059435 5063398 VDAG_JR2_Chr1g15670.1 6.15753357787931 5.90326826608747 6.26058776361204 0.580116 6.678387767217077 -0.9944034682474692 Two 3.11968797470799 Core
Chr1 5063583 5070049 VDAG_JR2_Chr1g15680.1 6.02690297586236 5.991197015453088 6.23497151669467 0.5420659999999999 5.5612660972278745 -0.992028023250773 Two 3.69882067845904 Core
Chr1 5069951 5071153 VDAG_JR2_Chr1g15690.1 0.0 5.9868842665383495 6.23781979040895 0.542429 5.181136291421105 -0.9960864671656948 Three 1.7505922149969098 Core
Chr1 5071757 5075400 VDAG_JR2_Chr1g15700.1 5.5521379471759404 5.7022777170804 6.2983814358682 0.583036 3.2345126316430868 -0.990103478967807 Two 0.380886765974896 Core
Chr1 5075825 5080160 VDAG_JR2_Chr1g15710.1 5.50008727627537 5.16933540428591 6.3484722257343495 0.582468 3.4006161696528285 -0.992618371975915 Two 1.70166088816668 Core
Chr1 5080384 5082463 VDAG_JR2_Chr1g15720.1 4.60217268186385 5.16369644324909 6.221710592991331 0.611352 3.636926322430656 -0.990629535680858 Two 1.86306714888889 Core
Chr1 5082740 5084272 VDAG_JR2_Chr1g15730.1 0.771910641508404 6.11929072649595 6.248003565716691 0.549608 3.106597617848073 -0.993552190201962 Three -2.03847782659292 Core
Chr1 5085829 5086676 VDAG_JR2_Chr1g15740.1 0.88998479102237 6.14606698253209 6.1172080312006925 0.5135770000000001 10.789915023175084 -0.992156878678971 Three -0.628420551042561 Core
Chr1 5086623 5087940 VDAG_JR2_Chr1g15750.1 5.654837198729791 6.054914338311111 6.04615878538118 0.5565680000000001 3.2732692293024375 -0.986503392325737 Two -0.15847231347781002 Core
Chr1 5088143 5089136 VDAG_JR2_Chr1g15760.1 4.82219028514617 6.6259611787134896 5.94170014081129 0.513595 5.7425707086926945 -0.986932020787521 Two 0.17230982328235198 Core
Chr1 5089266 5090159 VDAG_JR2_Chr1g15770.1 0.49016395811893 6.137417039195548 6.0740930351792 0.558791 4.683121511923209 -0.987262368103958 Three -2.9994518818231297 Core
Chr1 5090124 5092871 VDAG_JR2_Chr1g15780.1 5.03695003061675 6.439575713195058 6.02831541857491 0.535129 3.602468639940741 -0.990228765572606 Two -0.896269856731902 Core
Chr1 5093075 5095165 VDAG_JR2_Chr1g15790.1 5.44957745905051 6.26649005245118 6.0818056139059005 0.546411 1.951621172660232 -0.9933688131877172 Two -0.0698409637089773 Core
Chr1 5096510 5098593 VDAG_JR2_Chr1g15800.1 5.25247200575196 6.58834695989871 6.10553682471434 0.534806 1.6353569364423128 -0.992053772716512 Two -0.6447774971531239 Core
Chr1 5098898 5099409 VDAG_JR2_Chr1g15810.1 8.01725310250792 5.71685958641824 6.23198081087912 0.5577300000000001 5.6884986537371445 -0.992082406402718 Two -1.7544792883918798 Core
Chr1 5099361 5101503 VDAG_JR2_Chr1g15820.1 4.63132730351762 5.670298000963019 6.19501218478971 0.572829 5.90550638368472 -0.9909280012904208 Two 0.692328182928626 Core
Chr1 5101942 5103667 VDAG_JR2_Chr1g15830.1 7.054819814484558 5.87900019623838 6.570504028475421 0.56058 5.392803769600892 -0.985969303068545 Two 1.00662765554588 LS
Chr1 5103933 5104928 VDAG_JR2_Chr1g15840.1 6.41968545144316 7.14881232811041 6.123155142442111 0.542714 0.0 -0.9911471426909928 One -16.579845 
Chr1 5108022 5109451 VDAG_JR2_Chr1g15850.1 6.30612198614238 6.27240647262019 6.78202841181347 0.557033 3.174665875790628 -0.9931613233729448 Two -0.984855254165238 LS
Chr1 5109401 5111957 VDAG_JR2_Chr1g15860.1 6.77375659573588 7.283750335850309 6.179177060768208 0.511737 3.0659562466462797 -0.9905416714693492 One 1.5803274150712 LS
Chr1 5113491 5115663 VDAG_JR2_Chr1g15870.1 5.027086193853831 6.61046625369908 6.4650575203850975 0.5506449999999999 3.3701410638506464 -0.99210976765672 Two -0.7713191589313572 Core
Chr1 5115696 5124171 VDAG_JR2_Chr1g15880.1 6.797636436006267 6.8284252032632695 6.40455144056319 0.546313 2.2951250376311463 -0.991058645330389 One 0.521117664476352 Core
Chr1 5124526 5125368 VDAG_JR2_Chr1g15890.1 6.81466537504678 7.26589314515002 6.663283899380209 0.63658 0.0 -0.993480806616459 One -16.86316 
Chr1 5126541 5129273 VDAG_JR2_Chr1g15900.1 6.78450340360809 6.9706148590029295 6.5158616718884685 0.5065890000000001 1.5859926742809014 -0.994383358162492 One -0.14396384125156306 Core
Chr1 5129478 5130671 VDAG_JR2_Chr1g15910.1 6.74555751099967 6.347801780215192 7.091481474885678 0.569153 2.0059603877749432 -0.995005810535384 Two -0.94198570894628 Core
Chr1 5130732 5132471 VDAG_JR2_Chr1g15920.1 6.877239961877638 6.37327028254296 6.2919095243357095 0.542841 2.4619632014911543 -0.9909774875355508 Two 0.237145116097281 Core
Chr1 5136687 5141944 VDAG_JR2_Chr1g15930.1 6.059734972334733 5.6056045120579014 6.39857915180166 0.55545 3.7855410805806233 -0.991397141825739 Two 2.41707741452897 Core
Chr1 5142711 5144025 VDAG_JR2_Chr1g15940.1 6.42569461623549 6.031519803567848 6.45783423081806 0.579909 2.938045293861036 -0.9864215934994592 Two 0.4833591120582659 Core
Chr1 5144304 5146417 VDAG_JR2_Chr1g15950.1 0.8913986020644731 5.00871913427342 6.53102558867164 0.603881 2.427554057448857 -0.9899209717221692 Three 0.9586067435947372 Core
Chr1 5146179 5153617 VDAG_JR2_Chr1g15960.1 4.57476412696372 6.11944957949599 6.091393848599348 0.535762 5.733270223942976 -0.990551084535573 Two 5.01812237463438 Core
Chr1 5153928 5156735 VDAG_JR2_Chr1g15970.1 6.64733875773172 5.575913684257442 6.37518721556301 0.5454220000000001 2.6772029837022417 -0.98964084924375 Two 1.18646129385676 Core
Chr1 5157107 5159115 VDAG_JR2_Chr1g15980.1 7.74660945439859 5.004824513725719 6.4641810845745376 0.594622 6.72307659866027 -0.989536893869741 Two 0.888424113525133 Core
Chr1 5158946 5161845 VDAG_JR2_Chr1g15990.1 6.836575962111981 5.62161853001305 6.33263576167282 0.54605 6.287002312137921 -0.988208495889112 Two 1.69108293381119 Core
Chr1 5162613 5165469 VDAG_JR2_Chr1g16000.1 6.79688300939916 6.04929106087435 6.44009415898068 0.566527 4.911772290685164 -0.993516849395062 Two 2.7307625360937102 Core
Chr1 5165753 5169503 VDAG_JR2_Chr1g16010.1 5.2478641033273306 5.803893529212589 6.3292981087225 0.588267 5.731134490188763 -0.9892965707689628 Two 3.07751904306136 Core
Chr1 5169681 5170597 VDAG_JR2_Chr1g16020.1 5.7081286675002 5.94309684986902 6.75464270711009 0.605895 3.6148610676545 -0.980838301058927 Two -2.05030739453005 Core
Chr1 5170535 5174644 VDAG_JR2_Chr1g16030.1 5.75314856079854 5.2648826049106 6.39706429076252 0.590168 3.6314093586677587 -0.990439641203915 Two -0.250704744893847 Core
Chr1 5175498 5177266 VDAG_JR2_Chr1g16040.1 7.0796528759990895 5.586069049457951 6.543093260157501 0.616516 8.666886394155032 -0.990379993255484 Two 0.8874340823207 Core
Chr1 5177893 5179185 VDAG_JR2_Chr1g16050.1 6.30930117506411 5.9006279162407 6.520619935698861 0.526316 2.882216484471885 -0.99247474800036 Two 0.35960870665983097 Core
Chr1 5180306 5181490 VDAG_JR2_Chr1g16060.1 4.50248988585921 5.863703041500338 6.61474780941887 0.581926 9.772920261224968 -0.98986741726422 Two 2.6546600350490097 Core
Chr1 5182543 5184056 VDAG_JR2_Chr1g16070.1 4.78174493951537 5.0120603504072 6.5448198716844805 0.6411100000000001 2.6254583107930944 -0.9909605278147908 Two 0.23514108820281 Core
Chr1 5184886 5185922 VDAG_JR2_Chr1g16080.1 7.428272057279509 5.92640319249171 6.04615173400591 0.559846 4.2646756054469055 -0.9898416889535392 Two -0.8582439201085881 Core
Chr1 5185915 5187289 VDAG_JR2_Chr1g16090.1 6.28142627721524 5.16150756151743 6.39622827304532 0.601164 4.007200756711587 -0.9874853535384608 Two -0.755046442263441 Core
Chr1 5187602 5188718 VDAG_JR2_Chr1g16100.1 1.84400347579165 4.2391009565481 6.529245745077732 0.624552 4.9917290456212315 -0.993752303303223 Three 0.6506718368241611 Core
Chr1 5188607 5191779 VDAG_JR2_Chr1g16110.1 5.69176998422333 5.086421771285339 6.4514848664206506 0.571879 5.343736204179538 -0.99222730513305 Two 2.45377775199549 Core
Chr1 5191924 5194159 VDAG_JR2_Chr1g16120.1 6.724598123008982 5.670787847270678 6.6608820295269 0.576734 7.0026590408348826 -0.9923881548312852 Two 2.59883325253092 Core
Chr1 5194775 5197281 VDAG_JR2_Chr1g16130.1 5.500255841132669 6.04424220797812 6.217126552361551 0.549082 5.960805236590109 -0.9915637953489408 Two 1.42109001118239 Core
Chr1 5198315 5199614 VDAG_JR2_Chr1g16140.1 6.94701495609645 5.6826260102956905 6.96912549388746 0.589684 8.686679712293303 -0.991597182548725 Two 2.95759069074318 Core
Chr1 5199726 5201023 VDAG_JR2_Chr1g16150.1 7.199410438521451 5.52732410886603 5.89438344516372 0.5936779999999999 6.154202377514836 -0.991127308805657 Two 0.907374590409836 Core
Chr1 5201715 5202724 VDAG_JR2_Chr1g16160.1 7.23192309324123 5.93825633151405 6.00859869555917 0.564916 7.069906105960599 -0.985108194459372 Two -2.24468286390034 Core
Chr1 5202792 5203936 VDAG_JR2_Chr1g16170.1 6.34378673795457 5.2415070513441915 6.3428919456298205 0.592657 7.3158835074775235 -0.992611651447611 Two -0.427760659804023 Core
Chr1 5204137 5207037 VDAG_JR2_Chr1g16180.1 6.567065953851629 5.765575694512 6.149264061920719 0.541034 3.2380291668613195 -0.9894541159383 Two 1.91969301455254 Core
Chr1 5207181 5210135 VDAG_JR2_Chr1g16190.1 6.00530303902635 5.58631982749341 6.751879398892571 0.5514560000000001 5.518111565295162 -0.991954728877762 Two 1.93727769469708 Core
Chr1 5209975 5212293 VDAG_JR2_Chr1g16200.1 7.370209592029671 5.32619162747326 6.32732319974157 0.5565140000000001 5.3462079264082965 -0.992055936438076 Two 3.8763909484874 Core
Chr1 5212608 5214381 VDAG_JR2_Chr1g16210.1 6.904568237303059 5.02754747636275 6.20602870608406 0.606317 4.041814683978826 -0.9882228322236468 Two 1.04595944812066 Core
Chr1 5214566 5217177 VDAG_JR2_Chr1g16220.1 3.17409897666596 5.28657104799571 6.19614945458427 0.5538109999999999 10.473297063789843 -0.991850554100716 Two 3.37821599954485 Core
Chr1 5219502 5221075 VDAG_JR2_Chr1g16230.1 5.02096228081333 4.836408965815769 6.26135142705913 0.5778770000000001 3.2136898914835035 -0.99281264570991 Two 0.0217871203708668 Core
Chr1 5221757 5223900 VDAG_JR2_Chr1g16240.1 7.06818434307286 5.333543454945451 6.0195980310433 0.529165 4.410552987708561 -0.991426497098118 Two -1.10578879460749 Core
Chr1 5223931 5225282 VDAG_JR2_Chr1g16250.1 1.04946426262536 6.09766916656502 6.26298115682788 0.569948 6.779852739560182 -0.992374240370581 Three -1.66859829322217 Core
Chr1 5226124 5228791 VDAG_JR2_Chr1g16260.1 5.48844748600549 5.77533505236606 6.3917582622984686 0.561305 5.805279284247916 -0.991035265627124 Two -0.104667980804248 Core
Chr1 5228720 5229134 VDAG_JR2_Chr1g16270.1 6.9749989020739696 7.13207742449029 6.36041802544384 0.502415 5.879119503645947 -0.992620469634403 One -1.04658085289992 Core
Chr1 5229343 5230686 VDAG_JR2_Chr1g16280.1 7.00586947224162 5.72331079827745 6.288949881441928 0.574088 6.137513127630888 -0.986946308311404 Two -0.5199248068504939 Core
Chr1 5230869 5232131 VDAG_JR2_Chr1g16290.1 6.57711635130842 5.22549862737913 6.138421366452451 0.560222 7.170529619712697 -0.9923488151054258 Two -0.211263514211187 Core
Chr1 5232597 5234020 VDAG_JR2_Chr1g16300.1 6.082743864327379 5.8178903168384 6.562010864483111 0.508784 6.115976532369294 -0.990262304033343 Two 0.89298423890332 Core
Chr1 5233989 5236320 VDAG_JR2_Chr1g16310.1 5.851276060374969 5.95894530169531 5.76382917851692 0.503646 5.8977782837159465 -0.993704792527096 Two 3.5029966015269203 Core
Chr1 5236585 5237486 VDAG_JR2_Chr1g16320.1 7.41809791532588 5.62260225609301 6.187789783621451 0.557159 11.198623155448477 -0.991786693152316 Two -0.0346520578876453 Core
Chr1 5237473 5239049 VDAG_JR2_Chr1g16330.1 5.79606781337184 5.3775443448727 5.89928440266099 0.530457 7.395857734753215 -0.9941992414762172 Two 1.5306889042877798 Core
Chr1 5238979 5240917 VDAG_JR2_Chr1g16340.1 6.008720777552072 6.424048881328193 6.49402516355973 0.555728 6.585425885105374 -0.9909102600443292 Two 2.9504415782866698 Core
Chr1 5241171 5242720 VDAG_JR2_Chr1g16350.1 6.54126204614893 5.963520036461492 6.38005103344622 0.556488 8.7331234122396 -0.9905719266851328 Two 6.673634335741402 Core
Chr1 5243715 5245961 VDAG_JR2_Chr1g16360.1 6.40620940216953 5.98694862817976 6.03185129603589 0.549421 6.6107099177196025 -0.9902416622000793 Two 1.91148039261999 Core
Chr1 5246156 5247550 VDAG_JR2_Chr1g16370.1 5.3361756857675 5.59608997115568 6.377687259286151 0.541607 2.2390218332011043 -0.989074202204788 Two -0.224061576475296 Core
Chr1 5247468 5248450 VDAG_JR2_Chr1g16380.1 5.754422236013429 6.20489897355458 6.09171613827716 0.511202 3.2396618840015603 -0.989078196878358 Two 0.476893559551636 Core
Chr1 5248605 5249915 VDAG_JR2_Chr1g16390.1 6.452933260679059 6.10647353067141 6.35657855397041 0.540458 3.801212527332915 -0.9935910633703968 Two 0.3789395523771679 Core
Chr1 5250460 5252625 VDAG_JR2_Chr1g16400.1 5.57678056645592 5.31917553119446 6.26914407912433 0.579677 5.107362416863872 -0.991826694337118 Two 2.4769452175609903 Core
Chr1 5253553 5259246 VDAG_JR2_Chr1g16410.1 6.081142386782791 5.6946349728679415 6.11843805020336 0.541894 3.6564184950965934 -0.9911188123309028 Two 3.3484380539535 Core
Chr1 5259502 5260777 VDAG_JR2_Chr1g16420.1 5.057689703919291 5.18068466580702 6.323830719161849 0.595294 4.9242929993907305 -0.990840000714524 Two 1.53237967990434 Core
Chr1 5263280 5266013 VDAG_JR2_Chr1g16430.1 4.80578193047589 5.69876239929431 6.28937264803848 0.564581 3.0643041460453104 -0.986308583305327 Two 0.6977471087929821 Core
Chr1 5266074 5267693 VDAG_JR2_Chr1g16440.1 5.646662201363848 5.54641677717023 6.00562760694996 0.5324270000000001 7.699590730624349 -0.990653666191709 Two -0.297296638499372 Core
Chr1 5267880 5268604 VDAG_JR2_Chr1g16450.1 6.0525784905582585 6.43336595185312 6.18932981254293 0.5511050000000001 9.207738974557438 -0.9914885001444828 Two -1.05132733985546 Core
Chr1 5270275 5271604 VDAG_JR2_Chr1g16460.1 7.06547724395401 5.951997027866992 6.196269080571519 0.5417609999999999 8.989447189553713 -0.9946817481833532 Two 4.8289740617483 Core
Chr1 5271994 5275389 VDAG_JR2_Chr1g16470.1 5.56685057723018 5.8894825365420695 5.85634103822991 0.533432 5.294844736125876 -0.992035028750961 Two 3.4056132856715697 Core
Chr1 5275323 5276882 VDAG_JR2_Chr1g16480.1 5.81737586875983 5.93588094733594 6.3162726037563095 0.574086 3.831385941755205 -0.992002545303842 Two 1.86160214675274 Core
Chr1 5278512 5281071 VDAG_JR2_Chr1g16490.1 6.57679173686329 6.55555890583437 6.60126602842048 0.595936 8.092853728953626 -0.990298518957223 Two 2.5714094657656603 Core
Chr1 5281307 5282676 VDAG_JR2_Chr1g16500.1 6.79514697153705 4.570976369549482 6.71773178369441 0.6785979999999999 4.793714869015178 -0.987857544873082 Two 1.5167044314480502 Core
Chr1 5282667 5283863 VDAG_JR2_Chr1g16510.1 0.6818543408423381 6.06452303671016 7.14439852065189 0.587793 1.3950628908555178 -0.9887013026737572 Three -1.7452103336150402 Core
Chr1 5284587 5286801 VDAG_JR2_Chr1g16520.1 3.0606935237912705 3.82095563188974 6.29556005653556 0.64589 2.491487926540757 -0.9876959503594308 Two -1.02300628102577 Core
Chr1 5286741 5288587 VDAG_JR2_Chr1g16530.1 2.04671107314849 5.06618728588985 6.07070525491897 0.576923 6.728730966828621 -0.984678046715771 Three 3.1136623627646296 Core
Chr1 5288623 5289960 VDAG_JR2_Chr1g16540.1 4.42883201904802 5.13696430226127 6.6301734476517 0.55273 3.4307435569348788 -0.992980995483666 Two 0.915571997025405 Core
Chr1 5290427 5293251 VDAG_JR2_Chr1g16550.1 6.9536550749074015 5.764351200109839 6.07086718089982 0.555241 6.0481458048896135 -0.9915210156121108 Two 2.99317005768075 Core
Chr1 5294202 5294944 VDAG_JR2_Chr1g16560.1 5.11266165154163 5.83596215378134 6.49796829858758 0.578167 4.298122534756322 -0.987276937652238 Two -0.801213337883966 Core
Chr1 5294940 5295620 VDAG_JR2_Chr1g16570.1 0.614795488602442 5.29383939425721 6.608214596270798 0.586765 1.2136860917479837 -0.989532096820842 Three -2.7481908229741205 Core
Chr1 5296470 5297314 VDAG_JR2_Chr1g16580.1 2.71484541678581 5.256378479359482 6.688476475846231 0.590047 3.625679587947828 -0.9853766655298172 Two 0.529980616026104 Core
Chr1 5298387 5300429 VDAG_JR2_Chr1g16590.1 5.48803808069221 5.50863009788123 6.2721605993258285 0.574437 7.6224386068230725 -0.989509582454622 Two 1.28772761392513 Core
Chr1 5302092 5303261 VDAG_JR2_Chr1g16600.1 6.55508578163138 5.90480596548406 6.38629738941296 0.5355 4.7191565580717665 -0.991909559982294 Two 2.22319040608624 Core
Chr1 5304145 5307550 VDAG_JR2_Chr1g16610.1 6.764258770700869 5.42653194701013 6.35699702170993 0.5585899999999999 2.8651774060594195 -0.990048397169156 Two -0.0954629847965499 Core
Chr1 5307536 5308983 VDAG_JR2_Chr1g16620.1 6.90815904846709 5.64261836009076 5.890452057705599 0.55425 5.0651894675887545 -0.990004382364555 Two 1.92141839306752 Core
Chr1 5309533 5311281 VDAG_JR2_Chr1g16630.1 4.65443063601261 5.68748715548895 6.1386156822328495 0.563501 6.929384588904581 -0.992494323251916 Two 3.2045758100146298 Core
Chr1 5311869 5313886 VDAG_JR2_Chr1g16640.1 7.010121414793661 5.70391260992733 5.928804318853557 0.536936 4.991913337718613 -0.991321487476885 Two 3.28419698011081 Core
Chr1 5313804 5316277 VDAG_JR2_Chr1g16650.1 6.01571049931712 5.951365277186151 5.90753956539958 0.545896 4.933950423312849 -0.992354032897164 Two -0.331645443959753 Core
Chr1 5317295 5318309 VDAG_JR2_Chr1g16660.1 6.9902565294934496 5.6671900174541605 6.095115109150269 0.531558 0.4252631464354408 -0.993825202872037 Two -4.6630758536878805 Core
Chr1 5318524 5319568 VDAG_JR2_Chr1g16670.1 7.2303783916904925 5.98433601257801 5.77935572899537 0.527778 7.205334594858721 -0.995609901394785 Two 2.18281110527797 Core
Chr1 5319528 5321128 VDAG_JR2_Chr1g16680.1 6.00516567894408 5.534609747883071 5.628607551733579 0.531875 5.660626124226207 -0.991983893582039 Two -0.828201953905756 Core
Chr1 5321353 5322636 VDAG_JR2_Chr1g16690.1 6.42706432002233 6.652188179151191 5.9118380202390375 0.519096 7.738209374179259 -0.992347877278204 Two 1.73453841618616 Core
Chr1 5323303 5324105 VDAG_JR2_Chr1g16700.1 0.536563707756604 5.783287529764952 6.092576976878378 0.531172 2.5742726556527167 -0.992548473897641 Three -2.04252026650048 Core
Chr1 5324702 5327913 VDAG_JR2_Chr1g16710.1 5.20974211071287 5.06104684748252 6.49349744530545 0.576767 8.48725221414827 -0.9917983006123552 Two 6.525289912301179 Core
Chr1 5328378 5329954 VDAG_JR2_Chr1g16720.1 5.81381613733461 5.89607937848264 6.36095456050764 0.581853 8.103443071935859 -0.993319934764184 Two 2.93915925858712 Core
Chr1 5329948 5331122 VDAG_JR2_Chr1g16730.1 4.69647622578376 5.58538078194715 6.32555686315813 0.660988 4.036509247673358 -0.990768646778395 Two -0.9063228424642068 Core
Chr1 5331478 5333599 VDAG_JR2_Chr1g16740.1 6.5283754159672585 5.22798658147942 6.48688938832356 0.5761430000000001 2.07038547252762 -0.990575720166624 Two -0.8864233993303859 Core
Chr1 5334312 5335920 VDAG_JR2_Chr1g16750.1 5.9145609406291 5.03546760223304 6.445512782309492 0.6063430000000001 3.923775735185158 -0.992771218049516 Two -1.34195905852445 Core
Chr1 5336086 5337865 VDAG_JR2_Chr1g16760.1 5.30701571329057 4.95357659813732 6.409468028806 0.5711069999999999 5.4964775577411995 -0.993737990955798 Two 3.61091678399305 Core
Chr1 5339045 5343591 VDAG_JR2_Chr1g16770.1 5.6967338821657005 5.68923695574716 6.13913341070853 0.569732 6.4065073471757445 -0.9913653359254608 Two 4.93324634906071 Core
Chr1 5343761 5345747 VDAG_JR2_Chr1g16780.1 5.521571077974862 5.875107130395019 5.973252552830711 0.536254 4.622927288473559 -0.990858974886677 Two -0.304323200299695 Core
Chr1 5346683 5348885 VDAG_JR2_Chr1g16790.1 7.5650474610551 5.779671871234549 6.5756754964100095 0.579019 6.4842349254846345 -0.993711354405387 Two 1.49004552915867 Core
Chr1 5349027 5351747 VDAG_JR2_Chr1g16800.1 0.948486161626136 4.8976008280481205 6.2080124002272425 0.5727939999999999 5.9046166296196425 -0.989427462324646 Three 1.2237390465466005 Core
Chr1 5351960 5353220 VDAG_JR2_Chr1g16810.1 6.29848815351205 5.544202051767041 7.06173420943314 0.564286 5.6901645295821 -0.989278022187022 Two 1.4216292555310202 Core
Chr1 5353841 5356945 VDAG_JR2_Chr1g16820.1 5.0295122797696905 5.480923608436049 6.311444805766821 0.576353 6.785727734362732 -0.992816899932532 Two 2.5566902048373 Core
Chr1 5358210 5358445 VDAG_JR2_Chr1g16830.1 2.0267979949209898 7.67534873634265 6.56264454996384 0.561702 0.515197173513795 -0.979177235875074 Three -6.88501115271346 Core
Chr1 5358941 5359925 VDAG_JR2_Chr1g16840.1 6.8571035394038615 6.721729708536 5.75224584662686 0.535569 0.07233303113798772 -0.9863278803962092 One -6.88501115271346 Core
Chr1 5363025 5366979 VDAG_JR2_Chr1g16850.1 6.509371336581348 5.25681037722358 6.529656327498982 0.567779 7.873514835627271 -0.990016528305244 Two 3.32979534639479 Core
Chr1 5367071 5368918 VDAG_JR2_Chr1g16860.1 4.613208001201981 4.6975051466215 6.453483824471049 0.5787760000000001 3.9767541175860215 -0.990425238615852 Two -3.16247663223453 Core
Chr1 5369005 5372582 VDAG_JR2_Chr1g16870.1 5.1226006876994 5.391865695115008 6.44203572422336 0.604697 3.6698486435729913 -0.98822422540973 Two 0.392638391969762 Core
Chr1 5372145 5375495 VDAG_JR2_Chr1g16880.1 5.745045962424589 5.6101795447930005 6.2609225867987 0.575522 3.0492505140646533 -0.989494255116377 Two 2.04813890466786 Core
Chr1 5375662 5378312 VDAG_JR2_Chr1g16890.1 4.31844897524388 5.943253940250242 6.5187216070359 0.5252829999999999 5.086253311589489 -0.9924001841418392 Two -0.992538536970299 Core
Chr1 5378080 5379190 VDAG_JR2_Chr1g16900.1 6.87689995201372 6.36188230170039 6.2949004085419205 0.545045 2.5147618210178115 -0.98955161974937 Two -0.543690773043704 Core
Chr1 5379145 5381046 VDAG_JR2_Chr1g16910.1 7.37482753842796 5.763881493445997 5.73456697921518 0.5412939999999999 4.081925059946487 -0.989985880378755 Two 2.24805143704323 Core
Chr1 5381118 5382467 VDAG_JR2_Chr1g16920.1 6.43808936388714 5.48074491041336 6.52512322985869 0.60341 5.61459432764789 -0.990220305277874 Two 2.2578181367165 Core
Chr1 5386599 5391077 VDAG_JR2_Chr1g16930.1 7.1992889135545886 5.591311689917131 6.18663070345412 0.533274 7.200133595718337 -0.991032524076422 Two 4.24401179983321 Core
Chr1 5391875 5394104 VDAG_JR2_Chr1g16940.1 5.31255357899631 5.858997313605701 6.1409020561990895 0.544639 8.138469715924693 -0.991364529040521 Two 4.771119183768509 Core
Chr1 5395460 5402658 VDAG_JR2_Chr1g16950.1 5.88819582816535 5.4920287949389515 6.3474941698561915 0.574048 5.197402822551783 -0.993046308472229 Two 3.47514096110481 Core
Chr1 5403327 5404107 VDAG_JR2_Chr1g16960.1 7.89303184304851 5.07449787039798 6.27974032583529 0.641026 4.906610289470469 -0.9853750591981092 Two -2.10566985608804 Core
Chr1 5404140 5405752 VDAG_JR2_Chr1g16970.1 5.338012027480191 4.74180007998887 6.62841613779463 0.602978 3.921864948046095 -0.989050370680902 Two 1.8052445480400696 Core
Chr1 5406564 5411434 VDAG_JR2_Chr1g16980.1 4.79998167930913 5.396069767443099 6.253984893471968 0.5924020000000001 3.823228108847645 -0.9920518230927968 Two 0.8156463501239709 Core
Chr1 5412714 5412979 VDAG_JR2_Chr1g16990.1 8.16652751614512 5.83931314293215 6.7472167445265985 0.554717 11.541716190278866 -0.988280235786407 Two 0.396545117690457 Core
Chr1 5414709 5416200 VDAG_JR2_Chr1g17000.1 4.684678974479152 5.75397801973276 6.564037936105031 0.631791 7.904331617319614 -0.990896487533862 Two 4.820411629947911 Core
Chr1 5416654 5417609 VDAG_JR2_Chr1g17010.1 7.06389418999326 5.564180011785918 6.302423866106943 0.526702 14.013686640170505 -0.989255437507029 Two 5.34098848326055 Core
Chr1 5417775 5419930 VDAG_JR2_Chr1g17020.1 6.38642147765957 4.92259187690599 6.36075840044208 0.621346 5.300310221373974 -0.993654181772889 Two 1.87669025110266 Core
Chr1 5419799 5423770 VDAG_JR2_Chr1g17030.1 7.01956263789907 5.704035641287311 5.90979942303252 0.543692 5.160637890468447 -0.99083309527849 Two 0.43250845354698 Core
Chr1 5424201 5428195 VDAG_JR2_Chr1g17040.1 5.46733244930007 5.65317029487466 6.194859772898389 0.583125 2.3630513786392213 -0.991080046001111 Two 0.396532121882493 Core
Chr1 5429255 5431111 VDAG_JR2_Chr1g17050.1 6.1514130400645985 5.32784249447834 6.369930636541232 0.58028 5.696216106570545 -0.987979801273624 Two 3.8619015064179294 Core
Chr1 5431407 5436399 VDAG_JR2_Chr1g17060.1 4.28753221046404 5.2755823037616905 6.33276507524212 0.5691109999999999 10.301000244570393 -0.992076712125684 Two 6.29322129784912 Core
Chr1 5437500 5438707 VDAG_JR2_Chr1g17070.1 7.002505295252969 4.75641051696926 7.06644716724841 0.587407 2.3166596257388115 -0.9893459185290552 Two -0.6200470785221911 Core
Chr1 5442854 5446360 VDAG_JR2_Chr1g17080.1 6.5056401658096386 5.92286655124066 6.1784034071209 0.555904 6.763459492329192 -0.9914310517796552 Two 4.92549027665049 Core
Chr1 5446665 5450596 VDAG_JR2_Chr1g17090.1 4.9222165971656295 5.4655814818361295 6.30190451395049 0.5766979999999999 5.566256773172267 -0.98842306809779 Two -0.635377931080864 Core
Chr1 5450010 5451494 VDAG_JR2_Chr1g17100.1 5.52488615208153 5.760641670910291 6.27270340405895 0.588949 1.844111049486287 -0.99143677648191 Two -0.724998162337244 Core
Chr1 5451970 5453642 VDAG_JR2_Chr1g17110.1 0.898697746341271 4.97416158241171 6.53018057243711 0.6279899999999999 6.006398721940572 -0.992516154708686 Three 1.62065396112388 Core
Chr1 5454223 5456512 VDAG_JR2_Chr1g17120.1 5.68238220169726 4.48335602659592 6.73014250397522 0.634775 6.733245305210002 -0.9886973509344992 Two 1.79938346821468 Core
Chr1 5456603 5460337 VDAG_JR2_Chr1g17130.1 6.1170967455361 5.21831686065637 6.60570752588485 0.584896 3.227880178214752 -0.993173479779298 Two 2.35673524953248 Core
Chr1 5459838 5463196 VDAG_JR2_Chr1g17140.1 3.95658072162664 4.99346816469807 6.3357899880344295 0.612865 4.592405780292912 -0.991352451386489 Two 2.69628024596367 Core
Chr1 5463360 5466443 VDAG_JR2_Chr1g17150.1 6.64766079692082 5.35479246189756 6.648515966756411 0.56698 6.207758925549028 -0.9913833622235252 Two 5.20159561403384 Core
Chr1 5466217 5468452 VDAG_JR2_Chr1g17160.1 5.76415645228922 5.1320214269315585 6.554820042554669 0.6214770000000001 6.488383628326916 -0.989866893963799 Two 1.40577563726001 Core
Chr1 5468623 5469870 VDAG_JR2_Chr1g17170.1 5.83088286806658 5.13685825562998 6.2893806975608095 0.6014430000000001 3.7497805147338377 -0.992696740155468 Two 1.61514545755707 Core
Chr1 5469783 5472667 VDAG_JR2_Chr1g17180.1 4.30686178299231 5.314293019773901 6.2859635272271 0.571429 5.997636447515509 -0.9909062686091228 Two 2.01529483067209 Core
Chr1 5474307 5474477 VDAG_JR2_Chr1g17190.1 1.64402404818675 7.44465903182887 6.14953657279563 0.5352939999999999 2.062615370844176 -0.9932897784104472 Three -4.68883370766139 Core
Chr1 5475480 5476938 VDAG_JR2_Chr1g17200.1 5.157604192245549 6.36559511786109 6.28115351712164 0.540466 1.5442631233678836 -0.993538231773426 Two -2.1174165479955303 Core
Chr1 5477223 5480846 VDAG_JR2_Chr1g17210.1 4.734975236187929 5.971632087742 6.08626644956259 0.550925 4.6735295143944136 -0.991429672388777 Two 2.81266908539225 Core
Chr1 5480713 5482038 VDAG_JR2_Chr1g17220.1 4.86229668392306 3.98888285499576 6.66094169983845 0.716226 1.8151777750193576 -0.992493277159844 Two -0.944551220527528 Core
Chr1 5482865 5485854 VDAG_JR2_Chr1g17230.1 6.18112752467432 5.39273848585668 6.4159383112868085 0.5818 4.569024042059695 -0.991317554374062 Two 3.39059787132958 Core
Chr1 5486084 5488837 VDAG_JR2_Chr1g17240.1 6.87544205287557 5.66318738492189 6.29782346892011 0.580094 2.4237628418407207 -0.990370861617602 Two -0.0717186044573266 Core
Chr1 5489152 5490423 VDAG_JR2_Chr1g17250.1 0.6494290429674521 4.95197241871125 6.23675725077873 0.6286390000000001 2.88954629483952 -0.985166965777338 Three -4.91773962234736 Core
Chr1 5492017 5494268 VDAG_JR2_Chr1g17260.1 6.45411522166329 6.03164932792643 6.341521468692322 0.562861 3.3649922968442043 -0.991362697997388 Two 0.7507817261828921 Core
Chr1 5494760 5499388 VDAG_JR2_Chr1g17270.1 4.68641390919794 5.26212425766552 6.21819771468909 0.600475 4.246980258548638 -0.992631364802654 Two 1.8360827543104896 Core
Chr1 5499732 5501497 VDAG_JR2_Chr1g17280.1 4.90033566993636 4.83300333363674 6.55128973193106 0.65779 2.996853490210964 -0.9895981772796312 Two -2.7499564874193503 Core
Chr1 5501533 5503790 VDAG_JR2_Chr1g17290.1 5.1913599956846905 5.541629406015401 6.5351558199309405 0.5657949999999999 2.7833797377774316 -0.992701755606346 Two -4.63743536956279 Core
Chr1 5504493 5505179 VDAG_JR2_Chr1g17300.1 6.4578642180991 5.40281345589621 7.25742689801793 0.569971 1.4545070087210277 -0.997343102304532 Two -4.25781802518046 Core
Chr1 5506348 5508885 VDAG_JR2_Chr1g17310.1 5.541435095063031 5.551240294022058 6.2952655363615 0.53922 7.863922749144533 -0.992914202274612 Two -0.624004579500213 Core
Chr1 5510606 5513157 VDAG_JR2_Chr1g17320.1 6.64185644710716 5.04103625868442 6.94329744621387 0.577029 1.8471612623401856 -0.9901799512447548 Two 0.0587185624303463 Core
Chr1 5513557 5515425 VDAG_JR2_Chr1g17330.1 4.3326186126432695 5.06105483640657 6.939671355097481 0.589936 1.947398514638992 -0.9922841378830508 Two -0.21944713784785894 Core
Chr1 5515327 5516064 VDAG_JR2_Chr1g17340.1 4.753982856136 3.8113663091726 6.54042176118224 0.70692 2.111412704645316 -0.993960451500437 Two -1.21011899465754 Core
Chr1 5516117 5518885 VDAG_JR2_Chr1g17350.1 4.47746176049371 5.74083116001604 6.3852041967941 0.597182 4.763438470039277 -0.990372438086225 Two 0.0701881059846593 Core
Chr1 5519991 5520542 VDAG_JR2_Chr1g17360.1 1.85716620307095 7.3176829888573 6.1206137394067 0.577132 0.34738029901971235 -0.988592015919474 Three -5.42574112532876 Core
Chr1 5521755 5522027 VDAG_JR2_Chr1g17370.1 8.04446924449252 8.60427817829809 5.919811934567112 0.547794 0.2431366722753224 -0.9906378967963092 One -7.84690699137212 Core
Chr1 5522168 5523643 VDAG_JR2_Chr1g17380.1 6.88672670435271 7.41341940904292 5.88895739891678 0.5430510000000001 0.0486712921473666 -0.9850062439544692 One -6.88501115271346 Core
Chr1 5524865 5526145 VDAG_JR2_Chr1g17390.1 6.68906844558513 6.263898591945031 6.027924412178191 0.564062 0.0 -0.993876897262509 Two -12.309292 
Chr1 5526718 5527122 VDAG_JR2_Chr1g17400.1 6.59535402987201 6.15875123944525 6.273416425064111 0.586634 0.4509978447599909 -0.9929624492600658 Two -6.009802223201341 Core
Chr1 5527286 5528963 VDAG_JR2_Chr1g17410.1 4.792645077871518 4.48403899201188 6.3027934985555 0.661896 3.4957154722704766 -0.991117136229223 Two 0.485925786049613 Core
Chr1 5528944 5532959 VDAG_JR2_Chr1g17420.1 6.00187728091879 6.06154672671198 6.2386240470586 0.566376 6.216570971231581 -0.9911932067093 Two 0.393813361552636 Core
Chr1 5533854 5537445 VDAG_JR2_Chr1g17430.1 5.93945132784452 5.0282328914892 6.40181307650184 0.573656 5.319086598492006 -0.9899078533656948 Two 2.5869078492565096 Core
Chr1 5539060 5545156 VDAG_JR2_Chr1g17440.1 5.10552954834767 5.3438370143242 6.07752617371354 0.584482 4.43749327868814 -0.992096991461605 Two 1.85314642552594 Core
Chr1 5545670 5548477 VDAG_JR2_Chr1g17450.1 6.5053393473207315 5.754253428416622 6.4385765356882505 0.5532600000000001 2.4079413321750933 -0.991182494322929 Two 0.8696356000864058 Core
Chr1 5548561 5551204 VDAG_JR2_Chr1g17460.1 5.7039794283115 5.41525852491954 6.3281201771064985 0.554294 4.975353021919417 -0.989742838830135 Two 3.6383785156126702 Core
Chr1 5552098 5554946 VDAG_JR2_Chr1g17470.1 6.6376998676589585 5.698103204324871 6.73664516154955 0.557233 1.143089926852746 -0.9912733186272172 Two -1.8429807873978896 Core
Chr1 5554882 5558195 VDAG_JR2_Chr1g17480.1 6.329030440673113 5.326288546145901 6.8214242466688 0.598853 5.276837470382542 -0.989978282650803 Two 4.29260026717705 Core
Chr1 5558308 5559207 VDAG_JR2_Chr1g17490.1 1.14124468981165 4.72737578423586 6.4115592208739605 0.567297 2.773120368514591 -0.9897394890994252 Three -2.12607600247435 Core
Chr1 5559290 5561669 VDAG_JR2_Chr1g17500.1 6.6616046803290905 5.12386491149354 6.22170607179888 0.5590579999999999 6.2461724346503305 -0.99238394514372 Two 1.9727438512076203 Core
Chr1 5563175 5564501 VDAG_JR2_Chr1g17510.1 6.30747373248272 5.74884123368593 6.89052453800838 0.550528 1.4288505600865828 -0.992111427019846 Two -1.52912667900737 Core
Chr1 5564927 5566731 VDAG_JR2_Chr1g17520.1 4.8399168769045 5.6109897602308285 6.71425767522647 0.5643020000000001 0.9142145419694772 -0.992738650674066 Two -1.98832827656477 Core
Chr1 5567845 5571732 VDAG_JR2_Chr1g17530.1 4.6428232294423495 5.38845159635025 6.186842553339031 0.582969 6.27550235840243 -0.992427884429108 Two 3.67530795630868 Core
Chr1 5573523 5576323 VDAG_JR2_Chr1g17540.1 6.271698339240509 6.15520161818046 6.2297652350497605 0.569643 6.043699817491006 -0.989700650639535 Two 2.97529875897477 Core
Chr1 5576496 5577988 VDAG_JR2_Chr1g17550.1 2.48572456330807 5.454713482181631 7.23067542887705 0.58244 1.8915667409994887 -0.99311361441476 Two -0.7398635015886441 Core
Chr1 5578895 5580063 VDAG_JR2_Chr1g17560.1 6.2915957641750095 4.9521735517959815 7.40721042147165 0.597603 2.7574267058826107 -0.988587276130602 Two 0.0170741002474861 Core
Chr1 5580154 5583332 VDAG_JR2_Chr1g17570.1 3.64187530758821 6.03786954744253 6.342484180523571 0.5903079999999999 6.18654087434775 -0.992641529773644 Two 5.15846414284387 Core
Chr1 5583269 5586018 VDAG_JR2_Chr1g17580.1 5.50540384648256 5.911766409162638 6.045340737043659 0.541288 4.128116669550499 -0.990130279419898 Two 1.8990910023876295 Core
Chr1 5587814 5590189 VDAG_JR2_Chr1g17590.1 6.895470845928742 5.69156960242336 6.39685266358519 0.579789 9.05310609345332 -0.990713137472527 Two 3.4493866607501604 Core
Chr1 5590605 5592163 VDAG_JR2_Chr1g17600.1 5.30365793216947 5.4099108751818505 6.31526632126585 0.602054 5.9838095119633845 -0.993235963975542 Two 0.751187631047305 Core
Chr1 5607966 5609065 VDAG_JR2_Chr1g17610.1 7.078265881313679 5.92217445492666 6.10676191283381 0.598726 5.357118976117817 -0.994591967274145 Two 0.8251287386458699 Core
Chr1 5609792 5611978 VDAG_JR2_Chr1g17620.1 4.54308758943312 4.82160566234758 6.40917687451861 0.580512 7.915382642004937 -0.9921930331379 Two 2.73951744545781 Core
Chr1 5612327 5614928 VDAG_JR2_Chr1g17630.1 5.443184665600259 5.5025706575696205 6.131868675112281 0.584006 2.8402123156084422 -0.989986314802876 Two -0.554992635244756 Core
Chr1 5615316 5617253 VDAG_JR2_Chr1g17640.1 6.1787469777526605 6.00501226221138 5.96210480460464 0.516779 1.9491914711729768 -0.98633830707929 Two -1.22043730353878 Core
Chr1 5618025 5621631 VDAG_JR2_Chr1g17650.1 6.27520477442101 5.53199283056321 6.45634979909558 0.580699 6.40100981275604 -0.9910916411547048 Two 4.5874195118773695 Core
Chr1 5622395 5623243 VDAG_JR2_Chr1g17660.1 0.889201337507001 5.47379358190732 6.026325729851132 0.5471699999999999 6.601218305002015 -0.993264145043171 Three 1.12460373689664 Core
Chr1 5623165 5624091 VDAG_JR2_Chr1g17670.1 8.25797751257851 6.019315570185031 5.88698251802271 0.550756 7.280727154376137 -0.983755155023552 Two 14.166046 
Chr1 5625239 5625949 VDAG_JR2_Chr1g17680.1 5.467789414505099 5.548750780165403 6.591379775726511 0.605634 2.5980874337401976 -0.99277928902635 Two -1.3984410251712098 Core
Chr1 5625894 5627383 VDAG_JR2_Chr1g17690.1 5.15783288658088 5.51349864870528 6.177895919152348 0.534587 8.875632510138564 -0.99362181054939 Two 3.3297030995792203 Core
Chr1 5627640 5630883 VDAG_JR2_Chr1g17700.1 6.743843843978982 5.329328372761 6.6812397915027 0.6006779999999999 4.414852482657248 -0.990571749777978 Two 3.34123724173125 Core
Chr1 5634165 5638326 VDAG_JR2_Chr1g17710.1 5.50095477234261 5.24496332463622 6.05304723561093 0.5577989999999999 5.542580549073521 -0.990948374639944 Two 3.9216288888887103 Core
Chr1 5638631 5639772 VDAG_JR2_Chr1g17720.1 3.39229989493963 5.90321703626512 6.34148941793813 0.56617 2.6016975206029755 -0.9951919024676807 Two -2.11588049430913 Core
Chr1 5639890 5642224 VDAG_JR2_Chr1g17730.1 7.30492847942271 5.76043152788146 6.22996354748451 0.544987 3.86444884228379 -0.993888370320316 Two 1.29706583793677 Core
Chr1 5642377 5644416 VDAG_JR2_Chr1g17740.1 7.7521451308906615 5.37235003952629 6.42247493708662 0.5561550000000001 2.373938498098344 -0.991054758920403 Two -0.544309754441523 Core
Chr1 5644512 5646506 VDAG_JR2_Chr1g17750.1 6.12630825298129 5.11060956619157 6.31407596655745 0.594784 4.244276590920598 -0.9898060801360642 Two 0.6950879884056831 Core
Chr1 5646264 5648735 VDAG_JR2_Chr1g17760.1 5.11398398919878 5.51013811859828 6.08580034121138 0.550384 4.227463856711782 -0.990423569845577 Two 0.388910686653644 Core
Chr1 5648991 5650999 VDAG_JR2_Chr1g17770.1 5.88994357664642 5.31384863428101 6.77581162679838 0.573705 9.646988088377675 -0.9922293138369128 Two 0.6707845403741 Core
Chr1 5651340 5653526 VDAG_JR2_Chr1g17780.1 7.187739851785589 6.04892990199576 5.88344218619245 0.5530649999999999 3.2360722107162343 -0.99158703878019 Two 1.55959412024399 Core
Chr1 5653778 5654996 VDAG_JR2_Chr1g17790.1 6.83690658808419 5.275351354340571 6.22511525667298 0.5509029999999999 10.943981100586344 -0.9957442593302652 Two 0.127194034199034 Core
Chr1 5655191 5656578 VDAG_JR2_Chr1g17800.1 6.636168406575 5.840857966471501 6.46552684447102 0.585436 6.1107170417250725 -0.987629548723466 Two 0.542267527132121 Core
Chr1 5656328 5657544 VDAG_JR2_Chr1g17810.1 6.95779323252542 5.41760496817413 6.307196916671599 0.610197 4.151647752760895 -0.990221630988814 Two -1.10324464406007 Core
Chr1 5657710 5660365 VDAG_JR2_Chr1g17820.1 3.57131093357798 5.67307919741035 6.33692830099586 0.572128 5.51061311843178 -0.987754479733659 Two 4.21659272336454 Core
Chr1 5661808 5663760 VDAG_JR2_Chr1g17830.1 6.54479500192647 5.22321347227304 6.057673519064091 0.572234 3.3106290065095254 -0.991214727072772 Two 0.485946975344007 Core
Chr1 5663962 5666994 VDAG_JR2_Chr1g17840.1 7.18180881997323 5.501147127721571 5.725830025777579 0.53496 2.6671190240077416 -0.991874780519304 Two 0.320090025033002 Core
Chr1 5667291 5668610 VDAG_JR2_Chr1g17850.1 7.371829644836692 5.35346738611897 6.181510805267509 0.59439 2.468279635832588 -0.9851245935542712 Two -0.100133221466416 Core
Chr1 5670770 5676542 VDAG_JR2_Chr1g17860.1 5.642444994003791 5.641605853953401 6.29377768650468 0.54955 4.881830654377322 -0.992051578650999 Two 2.83876849733895 Core
Chr1 5676127 5680943 VDAG_JR2_Chr1g17870.1 6.479413338403339 4.91104134823118 6.46011423629446 0.6036130000000001 5.9352067100370425 -0.995271398451543 Two 1.33419801709491 Core
Chr1 5681088 5683638 VDAG_JR2_Chr1g17880.1 5.335928825683348 5.072985414563219 6.68503481229988 0.612941 3.745956132945949 -0.988704745143858 Two -2.58660435608817 Core
Chr1 5683178 5684554 VDAG_JR2_Chr1g17890.1 5.940018478486531 4.97051929388187 6.496846596414652 0.6780520000000001 0.3667813254703353 -0.9934247412309092 Two -4.40399546306849 Core
Chr1 5684973 5688547 VDAG_JR2_Chr1g17900.1 5.63597370049949 4.87288878555091 6.47332439197644 0.58338 8.03834423820532 -0.989245132149499 Two 2.08746606712401 Core
Chr1 5689515 5691729 VDAG_JR2_Chr1g17910.1 5.9663425316443 6.24920472944325 6.01941496917326 0.536134 1.2764752560086303 -0.9899333071562008 Two -1.1343344793193402 Core
Chr1 5693065 5697735 VDAG_JR2_Chr1g17920.1 6.58509413879979 5.57577439053197 6.05117707003791 0.5507489999999999 5.968191151828967 -0.9924998974892488 Two 1.6144171440807 Core
Chr1 5698374 5702053 VDAG_JR2_Chr1g17930.1 6.3751214738641115 5.285722696210018 6.519154747023372 0.570807 4.9036168577672266 -0.993860527960391 Two 4.05393402162767 Core
Chr1 5702436 5706805 VDAG_JR2_Chr1g17940.1 5.6258227770534806 5.89308144208434 5.872667100811 0.526894 4.529019159072912 -0.98934697485743 Two 2.93029070433211 Core
Chr1 5707495 5709639 VDAG_JR2_Chr1g17950.1 6.93470587500687 5.72490949046966 5.903549687560692 0.5541050000000001 5.550629971404834 -0.9897785697998592 Two 1.49567157618588 Core
Chr1 5710048 5711367 VDAG_JR2_Chr1g17960.1 6.78166894460083 5.85741529298 6.05491887623801 0.557998 4.349974889571538 -0.991644599960848 Two -1.19655473682837 Core
Chr1 5711791 5713580 VDAG_JR2_Chr1g17970.1 6.381991147264402 5.32362738589792 6.30589447849391 0.55953 6.0312491700172695 -0.993622324239944 Two 1.74940482698374 Core
Chr1 5713804 5714623 VDAG_JR2_Chr1g17980.1 0.91251523326849 6.760308373984151 6.34648729221508 0.492063 8.205499669383977 -0.994011634262441 Three -0.107256232753139 Core
Chr1 5715152 5718874 VDAG_JR2_Chr1g17990.1 6.3205150652864885 5.7573936914665484 5.73291222533388 0.545137 4.568535426966432 -0.9910926440230892 Two 2.7566203152563595 Core
Chr1 5719074 5719906 VDAG_JR2_Chr1g18000.1 4.298186676138871 6.4581575509950495 6.284159357707161 0.542067 7.177464413167416 -0.991940230206048 Two -1.09560976961446 Core
Chr1 5720110 5721503 VDAG_JR2_Chr1g18010.1 6.57611602117432 6.1489082342797605 6.14234270314973 0.549892 6.396635246928287 -0.990466281656942 Two -0.740432701263585 Core
Chr1 5721467 5723964 VDAG_JR2_Chr1g18020.1 5.10539824694744 5.36671852945886 6.395185074543541 0.5698840000000001 4.761246356724201 -0.991222265184994 Two 3.34138008944446 Core
Chr1 5724455 5725540 VDAG_JR2_Chr1g18030.1 6.506394005077912 6.15557509028589 6.00238637917092 0.545622 0.1831219053744116 -0.988947040381462 Two -5.42496966958905 Core
Chr1 5725953 5727342 VDAG_JR2_Chr1g18040.1 7.4166774127477515 6.190276122163451 6.06929218122341 0.537077 0.051629345858393814 -0.9908742390084592 Two -6.010603579088169 Core
Chr1 5730833 5735569 VDAG_JR2_Chr1g18050.1 6.00893068672056 5.56311728552032 6.435977431571961 0.5724239999999999 0.8811211237262749 -0.9902421336437328 Two -0.6846400630570141 Core
Chr1 5736412 5741501 VDAG_JR2_Chr1g18060.1 6.1826441418713705 5.29909458046224 6.41646931188954 0.561407 1.5078423827000549 -0.9920554828521608 Two 0.5092313730477199 Core
Chr1 5742058 5744745 VDAG_JR2_Chr1g18070.1 5.8946475593283 5.09769419194925 6.380398754419218 0.579457 4.978468408709505 -0.990356280662754 Two 3.66361625183317 Core
Chr1 5746730 5748220 VDAG_JR2_Chr1g18080.1 5.85157239254493 5.23380192212239 6.5215350861798 0.596644 3.567742082596695 -0.993599988155511 Two 1.34248515474617 Core
Chr1 5748422 5750760 VDAG_JR2_Chr1g18090.1 4.40902348943663 4.12875814856923 6.48408625352949 0.676647 5.401247779201853 -0.9929743923211828 Two 3.92700291545866 Core
Chr1 5750755 5754538 VDAG_JR2_Chr1g18100.1 3.3324769176236004 4.78527962911692 6.5440685402729 0.6114189999999999 5.685078958611064 -0.9898215155821808 Two 3.91106850683236 Core
Chr1 5756052 5757074 VDAG_JR2_Chr1g18110.1 5.1267775721752695 4.2901761161967 6.808451386217589 0.697652 4.4841236238521525 -0.9924256108612132 Two 0.7028443665940179 Core
Chr1 5757107 5758795 VDAG_JR2_Chr1g18120.1 6.464852704225709 5.51080090792124 6.47697072717788 0.582938 3.264340969608888 -0.993883636664467 Two 1.1359572478198998 Core
Chr1 5759096 5764657 VDAG_JR2_Chr1g18130.1 4.771560446253121 5.652313072514759 6.38358218604172 0.561769 4.784293104459311 -0.990710941777481 Two 2.70214771316816 Core
Chr1 5764750 5765407 VDAG_JR2_Chr1g18140.1 0.0 5.94414296344879 6.58863870068664 0.5509890000000001 6.139922971314343 -0.99105302533544 Three -1.57508244003084 Core
Chr1 5765439 5766795 VDAG_JR2_Chr1g18150.1 4.8028067858994685 6.31288600876128 6.1619345401516 0.511062 5.354310368567846 -0.989352755800492 Two -1.07761077823214 Core
Chr1 5768485 5771343 VDAG_JR2_Chr1g18160.1 6.16836721535305 5.325481226719839 6.54532684460458 0.60007 3.820973735535347 -0.98818811937202 Two 1.57152913773883 Core
Chr1 5771549 5773882 VDAG_JR2_Chr1g18170.1 6.862676822461928 5.564159778232058 6.52462141262119 0.566224 6.088271664262098 -0.992820517981512 Two 1.76110088082483 Core
Chr1 5774411 5776402 VDAG_JR2_Chr1g18180.1 6.92262947326617 6.01510908435948 6.55525137232818 0.56002 7.430521776977428 -0.9924957175878992 Two 5.73153288335466 Core
Chr1 5776609 5779937 VDAG_JR2_Chr1g18190.1 6.3573966432305085 5.597598834167888 6.36460434846324 0.5931489999999999 2.953188616798402 -0.99176532822573 Two 1.79368074832867 Core
Chr1 5781690 5783633 VDAG_JR2_Chr1g18200.1 4.815038617513991 5.46948331964795 6.42948792789488 0.585178 2.0370873858436545 -0.99210604814887 Two -0.0716151447062612 Core
Chr1 5783712 5785164 VDAG_JR2_Chr1g18210.1 5.48527776769862 5.6401981616412495 6.1434375093635785 0.52686 2.759480937436455 -0.989608394153404 Two 0.395138620932901 Core
Chr1 5788954 5790601 VDAG_JR2_Chr1g18220.1 4.700929727142559 5.53623418383093 6.52311126191216 0.55677 0.886914650752365 -0.991911989799815 Two -2.13039081503264 Core
Chr1 5791890 5794024 VDAG_JR2_Chr1g18230.1 5.62216667139809 4.64482633984407 6.921672612737219 0.648547 4.680319010690119 -0.9916738250273168 Two 2.9437602278197903 Core
Chr1 5794098 5796426 VDAG_JR2_Chr1g18240.1 3.7121344216538095 5.08844368786772 6.44232909061729 0.618557 4.6915660519032265 -0.990359577685359 Two 3.11324121757827 Core
Chr1 5796507 5798215 VDAG_JR2_Chr1g18250.1 5.06029619708789 5.0951131209012015 6.8771864835782095 0.6106560000000001 4.438832006809211 -0.991312452884063 Two 0.0605602851848632 Core
Chr1 5798306 5801569 VDAG_JR2_Chr1g18260.1 4.83091580068302 5.041881104905071 6.5858624815309 0.592093 4.715732145721564 -0.9937281820947392 Two 2.74195661320026 Core
Chr1 5801109 5802167 VDAG_JR2_Chr1g18270.1 1.24246117346614 4.52410210437418 6.55359804112497 0.694707 1.2963985471645059 -0.9924340964394228 Three -2.99826513493241 Core
Chr1 5802485 5804091 VDAG_JR2_Chr1g18280.1 6.47152446953717 4.28450815760824 6.607593877400651 0.665006 1.5312969824700668 -0.992310002515103 Two -0.8582604200494119 Core
Chr1 5804034 5806173 VDAG_JR2_Chr1g18290.1 5.94581663868903 5.443181012684961 5.9210342916790415 0.5586720000000001 3.0802309813395 -0.991957453625767 Two 1.29042735131277 Core
Chr1 5807026 5809122 VDAG_JR2_Chr1g18300.1 4.97780843088567 5.36475169266273 6.16802912974432 0.578244 3.041814095203564 -0.98700624301573 Two 1.2324054039847 Core
Chr1 5809062 5810411 VDAG_JR2_Chr1g18310.1 7.27368662276845 5.10159835077633 6.38342332509737 0.577465 4.256761778257888 -0.989526668770492 Two 1.14530725292949 Core
Chr1 5810354 5811362 VDAG_JR2_Chr1g18320.1 6.24631022881282 6.175055700655509 6.51821730207848 0.524802 3.6436773726809895 -0.995006736530335 Two 0.907768028244237 Core
Chr1 5811525 5812777 VDAG_JR2_Chr1g18330.1 6.09256554650106 5.9726383046418 6.474214004771942 0.510383 2.0066380098135634 -0.987217949538976 Two -0.7856190654180841 Core
Chr1 5812773 5813524 VDAG_JR2_Chr1g18340.1 1.28884449518065 6.02191392464218 6.40786680294516 0.553928 7.168552528011976 -0.9970176836079822 Three -1.5546055553967 Core
Chr1 5814955 5815473 VDAG_JR2_Chr1g18350.1 0.0 6.774200760659231 6.72300098356705 0.492278 3.0562568018757115 -0.9943368129796992 Three -2.1803290638665 Core
Chr1 5815954 5816784 VDAG_JR2_Chr1g18360.1 1.45484009516494 4.86068238845237 7.4965625463429415 0.6120479999999999 0.5639582823273487 -0.990031830908764 Three -3.99358360631834 Core
Chr1 5817160 5820395 VDAG_JR2_Chr1g18370.1 5.23395626236282 5.49021406407971 6.334611459321692 0.554869 4.271854062972772 -0.993278054043796 Two 0.350578575362722 Core
Chr1 5820558 5827089 VDAG_JR2_Chr1g18380.1 5.71439193349022 5.64846345085168 6.097848817738661 0.550145 7.462799292504253 -0.989018358386212 Two 4.06152792080377 Core
Chr1 5829585 5836464 VDAG_JR2_Chr1g18390.1 5.79082995477975 5.52098252751469 6.160014991421981 0.5615640000000001 7.4288573128965725 -0.9896771524341452 Two 6.563120106785281 Core
Chr1 5836404 5838582 VDAG_JR2_Chr1g18400.1 6.04865868083064 5.453543145064219 6.702701696628702 0.576676 6.738527578508887 -0.991749894682697 Two 4.2065589631851 Core
Chr1 5838720 5842550 VDAG_JR2_Chr1g18410.1 6.38285380417817 5.21927735386199 6.36841726913517 0.568146 6.713214837336498 -0.990921225502973 Two 2.3013264991450804 Core
Chr1 5843359 5844588 VDAG_JR2_Chr1g18420.1 4.615832744572081 5.8388936731136 6.611283590368871 0.58096 8.993328970245367 -0.992823673043612 Two -0.320068400728042 Core
Chr1 5850999 5855890 VDAG_JR2_Chr1g18430.1 5.753999979166981 4.964738379125071 6.3764367848249695 0.576569 6.224332670360184 -0.9926450893837092 Two 2.62279653813484 Core
Chr1 5857458 5859580 VDAG_JR2_Chr1g18440.1 0.5953207190869979 5.1206199647465 6.51884706175262 0.590952 3.7450631121434785 -0.98983170927704 Three -0.8251203591052679 Core
Chr1 5859800 5863928 VDAG_JR2_Chr1g18450.1 5.042092135163991 5.23114697651634 6.374798506559629 0.578731 5.345858369146728 -0.991215995751692 Two 3.69569561836424 Core
Chr1 5868122 5869905 VDAG_JR2_Chr1g18460.1 4.9252010552199295 6.49182368852031 6.28461709222152 0.523275 0.8772909891406767 -0.986328008427413 Two -2.18221119688313 Core
Chr1 5870373 5872255 VDAG_JR2_Chr1g18470.1 5.19048987163755 4.71167736326459 6.6055999981261815 0.568013 2.234679379162144 -0.9888607073736008 Two 0.15457666856032598 Core
Chr1 5876154 5881190 VDAG_JR2_Chr1g18480.1 5.00941078000942 5.3428056340831205 6.521241322951009 0.573868 2.446020158147668 -0.991759990107376 Two 0.830748203718021 Core
Chr1 5884074 5889147 VDAG_JR2_Chr1g18490.1 5.6418311671850505 5.62008621592062 6.68075720304035 0.5783560000000001 2.983798268788961 -0.990759868956059 Two 2.45937808026504 Core
Chr1 5889520 5893589 VDAG_JR2_Chr1g18500.1 4.16672169581328 5.55156595646528 6.581805834747372 0.601376 4.020371175057117 -0.9920353583767522 Two 0.84831590447987 Core
Chr1 5893717 5895674 VDAG_JR2_Chr1g18510.1 1.1968446207362902 4.99025941613308 6.13946746343964 0.60092 7.773765466714806 -0.9933490698609552 Three 1.1405478327198602 Core
Chr1 5896086 5899559 VDAG_JR2_Chr1g18520.1 5.43769518958632 5.1590306210282 6.357568344515211 0.577887 3.1945227059351544 -0.993727044118586 Two 2.11368388099926 Core
Chr1 5901755 5903351 VDAG_JR2_Chr1g18530.1 8.07168140547992 5.449174800628018 6.717435950672951 0.574561 2.0637932642468564 -0.991207838465804 Two -0.390942344904468 Core
Chr1 5903788 5905919 VDAG_JR2_Chr1g18540.1 5.83595359465294 4.33999711209064 6.62209306178443 0.625059 7.7907324425826845 -0.989220473437289 Two 2.76011104604743 Core
Chr1 5905913 5907429 VDAG_JR2_Chr1g18550.1 4.63420020068082 4.473191964270558 6.4045748046560576 0.69657 3.9688611598491312 -0.9916529169414908 Two 1.79162774075807 Core
Chr1 5908185 5911491 VDAG_JR2_Chr1g18560.1 5.894090177511702 5.3185260042149 6.149345342480768 0.636116 3.2957080458257395 -0.991245589652298 Two 1.22733878589328 Core
Chr1 5912207 5912323 VDAG_JR2_Chr1g18570.1 2.04080724234326 6.80033894330801 6.46557155756799 0.517241 0.8926847712331436 -0.994062974992148 Three -5.9474581178449 Core
Chr1 5912745 5915590 VDAG_JR2_Chr1g18580.1 6.05044563726835 5.207222765829151 6.3253491805930695 0.5803159999999999 8.400863089029231 -0.9916564790748572 Two 1.77225974076882 Core
Chr1 5916789 5919070 VDAG_JR2_Chr1g18590.1 5.687335028220558 5.3198614266347 6.3848490798864805 0.606313 6.1798906058423535 -0.991062826042763 Two 4.66778641198692 Core
Chr1 5919198 5922794 VDAG_JR2_Chr1g18600.1 4.4527940666282095 5.531644997917369 6.091400646251191 0.558954 4.476317996599227 -0.990196642962837 Two 3.5461692114613803 Core
Chr1 5922836 5924315 VDAG_JR2_Chr1g18610.1 0.793175087907268 5.25997628501395 6.104017296630678 0.5909399999999999 0.04698402932825105 -0.9917029042020648 Three 31.766844 
Chr1 5925213 5928416 VDAG_JR2_Chr1g18620.1 6.339461125331429 5.40426588876695 6.62423111809932 0.576335 4.251813105631575 -0.991686443110128 Two 1.33370676897807 Core
Chr1 5928856 5930214 VDAG_JR2_Chr1g18630.1 0.6155325356154929 4.65146979912244 6.55599846119375 0.639175 5.07848983977842 -0.991016813809688 Three 1.84893026163049 Core
Chr1 5930555 5935880 VDAG_JR2_Chr1g18640.1 5.7816266994234295 4.959940365007291 6.41004731163633 0.572394 4.33624348159484 -0.991791502304106 Two 2.18910395663268 Core
Chr1 5937268 5937946 VDAG_JR2_Chr1g18650.1 5.58183112470178 6.148926799482219 7.12604404858645 0.5530970000000001 0.5206206556410782 -0.986867444708051 Two -5.42496966958905 Core
Chr1 5938974 5940802 VDAG_JR2_Chr1g18660.1 5.48160799413262 6.17065421280512 6.468232266758847 0.585339 6.40023683130894 -0.991052100482016 Two 4.565305008365232 Core
Chr1 5940980 5945666 VDAG_JR2_Chr1g18670.1 6.7633839537922 5.5064880912665 6.4353272912547 0.603927 2.504577435119229 -0.986724480570464 Two 1.76057134558245 Core
Chr1 5945994 5947260 VDAG_JR2_Chr1g18680.1 2.14559807668351 5.33674223003657 6.508166548699911 0.636651 4.788559548741097 -0.9938403853985308 Three 1.4503209310781202 Core
Chr1 5947263 5949473 VDAG_JR2_Chr1g18690.1 5.33046812676822 5.549186299037991 6.39147016246133 0.59095 7.883914134854 -0.9912490007219008 Two 4.4826940096907 Core
Chr1 5949821 5951253 VDAG_JR2_Chr1g18700.1 1.0066577133723 6.098815748010348 6.16934822702878 0.511872 9.45829331252116 -0.992750260920612 Three -1.92363494805924 Core
Chr1 5951930 5952938 VDAG_JR2_Chr1g18710.1 7.85026668318946 6.12034336774189 6.50785864512298 0.521825 2.2356535211549526 -0.9926537109061532 Two -2.67997524695985 Core
Chr1 5953129 5955273 VDAG_JR2_Chr1g18720.1 0.5903068206566129 5.162808427169809 6.39648960120141 0.5923510000000001 6.347583744250804 -0.9931903916240752 Three 0.198261073689768 Core
Chr1 5955556 5959783 VDAG_JR2_Chr1g18730.1 4.93024573161655 5.6148291038557 6.08182234741552 0.550272 3.914488735973118 -0.991910856066625 Two 1.39053021323709 Core
Chr1 5959634 5962589 VDAG_JR2_Chr1g18740.1 6.2212458166380085 5.4257431095268 6.01187251079534 0.5634520000000001 3.0107365306203455 -0.992894571932834 Two -0.0520169547731395 Core
Chr1 5964773 5967390 VDAG_JR2_Chr1g18750.1 6.6377441163187685 5.4101477128531 6.03095315037326 0.546427 1.848121886541278 -0.990359577685359 Two -0.0470640896176029 Core
Chr1 5967537 5969943 VDAG_JR2_Chr1g18760.1 6.69650960883026 5.9383017034984515 6.10894035904917 0.547797 4.661607327683568 -0.992801403477397 Two 0.828044676319139 Core
Chr1 5970386 5980807 VDAG_JR2_Chr1g18770.1 5.87597821387964 5.63129598208113 5.9794206442505 0.533154 2.765450805771944 -0.9908011231271908 Two 3.22271885677568 Core
Chr1 5981353 5984897 VDAG_JR2_Chr1g18780.1 6.4008330733839705 4.9281162936621 6.565900418963309 0.5886 11.79148552826868 -0.992748773635844 Two 6.3888460552371 Core
Chr1 5984982 5988071 VDAG_JR2_Chr1g18790.1 5.64412378437034 5.13015025452699 5.99400396095232 0.581742 2.1026402907981487 -0.991090518410302 Two -0.250274645460055 Core
Chr1 5988266 5991403 VDAG_JR2_Chr1g18800.1 4.98879338572559 5.59820591852664 6.29283104202888 0.569334 6.223310269663299 -0.987509914075716 Two 3.3272405010311497 Core
Chr1 5991535 5993333 VDAG_JR2_Chr1g18810.1 5.19253016437128 4.951582877035059 6.596483757685991 0.6218020000000001 4.917906642282851 -0.992703116463239 Two 1.1634401412730802 Core
Chr1 5993895 5998189 VDAG_JR2_Chr1g18820.1 3.4611442782446 5.24293333627031 6.27459325247691 0.583838 5.30121807795028 -0.9925840658715492 Two 2.8341682134749706 Core
Chr1 5998825 6001196 VDAG_JR2_Chr1g18830.1 0.686658985546831 5.8463564546430495 6.41701558352665 0.567693 3.0906466467721367 -0.992650544264455 Three 1.41289015556506 Core
Chr1 6001961 6003112 VDAG_JR2_Chr1g18840.1 0.957345326709272 4.52669432956243 6.51568850245405 0.660295 4.674460334807414 -0.9899696348627348 Three -1.17796053923478 Core
Chr1 6003904 6005685 VDAG_JR2_Chr1g18850.1 6.1577704785165 5.10483104292367 6.661645395485751 0.658619 3.5189849287336887 -0.990218979207415 Two 1.46259283651517 Core
Chr1 6005898 6007797 VDAG_JR2_Chr1g18860.1 6.480307345481418 5.39239781763332 6.02213719829545 0.5365979999999999 0.7524945859009468 -0.9947816616331708 Two -2.67180370967888 Core
Chr1 6008208 6008813 VDAG_JR2_Chr1g18870.1 1.4811071381693102 4.76921334630046 6.7176862028113 0.575207 2.7010372593252785 -0.9933972651757528 Three -2.07083834073592 Core
Chr1 6009135 6014409 VDAG_JR2_Chr1g18880.1 6.654604810839 5.73109058520643 5.997439203135871 0.520667 1.3676839529888782 -0.992941660695424 Two 0.394142500893216 Core
Chr1 6014788 6016045 VDAG_JR2_Chr1g18890.1 7.721909098185232 5.05936000976472 6.42062365646934 0.649165 4.429228485086352 -0.991862741945008 Two 1.0615152857969 Core
Chr1 6016239 6019540 VDAG_JR2_Chr1g18900.1 6.0964398268136 5.6124150564454105 6.34041624771221 0.553772 4.775470146440346 -0.989960196198946 Two 2.80922523090752 Core
Chr1 6019758 6020647 VDAG_JR2_Chr1g18910.1 5.20027673667635 5.621390187241241 6.098850077962871 0.524184 2.895139576569965 -0.985528400623343 Two -0.138132830160933 Core
Chr1 6020647 6024963 VDAG_JR2_Chr1g18920.1 6.340403273190218 5.555927190978639 6.14827576774131 0.5537529999999999 3.0084672623926485 -0.9900263120949822 Two 2.3128637114924704 Core
Chr1 6025604 6026878 VDAG_JR2_Chr1g18930.1 6.537416862697572 5.118937060739 6.7550550933567415 0.5376770000000001 0.10799511266378664 -0.9902658701111742 Two -5.97798727606938 Core
Chr1 6027262 6034686 VDAG_JR2_Chr1g18940.1 5.651111851031951 5.4879143875115 6.4259078461257015 0.5727369999999999 5.033914148760379 -0.991343724370166 Two 2.3634828952871603 Core
Chr1 6034923 6036192 VDAG_JR2_Chr1g18950.1 0.361455852766371 5.37787994353911 6.40264257164607 0.635934 4.916574344974403 -0.98845495732743 Three 1.52506640775031 Core
Chr1 6036343 6037770 VDAG_JR2_Chr1g18960.1 5.63266906255059 5.2362191270202585 6.672712502085661 0.578136 4.44723994311942 -0.992130377099905 Two 2.18083622373976 Core
Chr1 6038034 6038604 VDAG_JR2_Chr1g18970.1 0.7083023617320869 5.08124477381371 7.74921802752134 0.603509 0.12136440806191315 -0.9923097097175893 Three 31.76758 
Chr1 6041608 6044280 VDAG_JR2_Chr1g18980.1 5.121238085222831 5.00347017818138 6.51572747396324 0.57485 2.465526505865343 -0.986528574043488 Two 0.924512890711848 Core
Chr1 6044700 6045825 VDAG_JR2_Chr1g18990.1 5.976937508993889 5.41328199809206 6.26020061770829 0.5751109999999999 3.068276077881338 -0.991373994984402 Two -0.6716283936355071 Core
Chr1 6046352 6047207 VDAG_JR2_Chr1g19000.1 5.8486641741258385 5.22713116027302 6.2887763888384605 0.564912 4.236897446205793 -0.9934323329328372 Two 0.9530686539357868 Core
Chr1 6047253 6048006 VDAG_JR2_Chr1g19010.1 0.0 5.45506335803445 6.8524742599350095 0.62417 4.909269932842303 -0.9935979702315 Three -1.2708663658763302 Core
Chr1 6048264 6050300 VDAG_JR2_Chr1g19020.1 0.2356800090137389 4.6999567769595805 6.5957630145094095 0.613949 3.4397794693249537 -0.9918159253479872 Three 1.63200141082437 Core
Chr1 6050394 6051230 VDAG_JR2_Chr1g19030.1 0.898697746341271 4.74361296652972 6.30042857006061 0.686603 2.100985161219377 -0.9902084975901508 Three -1.4405157611751005 Core
Chr1 6051916 6052671 VDAG_JR2_Chr1g19040.1 7.64443616055888 5.83215790309559 6.28623899545413 0.5682119999999999 0.17771552480743905 -0.994069947442807 Two -5.97798727606938 Core
Chr1 6053071 6053950 VDAG_JR2_Chr1g19050.1 0.496767789790627 4.21102341492636 6.1253317840789405 0.6222979999999999 0.7469129362962407 -0.990975068615631 Three -3.5222651203820403 Core
Chr1 6054025 6055187 VDAG_JR2_Chr1g19060.1 6.6285691003157 5.92596127828468 6.19931935833828 0.526678 3.6494170341200047 -0.992786509767426 Two -1.75519008943664 Core
Chr1 6055374 6057803 VDAG_JR2_Chr1g19070.1 5.31015078577148 5.43126420272394 6.3731196805873225 0.626184 2.9114169981268616 -0.993086694015194 Two 0.390903808832636 Core
Chr1 6057802 6059188 VDAG_JR2_Chr1g19080.1 6.54756999154574 5.1384328355806295 6.59784741781227 0.655123 1.7396385033027435 -0.9869635103231073 Two -1.0117149216103198 Core
Chr1 6059705 6060768 VDAG_JR2_Chr1g19090.1 7.3884490044644915 5.772457883146322 6.31957679275306 0.545626 0.9519536441680306 -0.987560343434466 Two -2.81886145388362 Core
Chr1 6061981 6064300 VDAG_JR2_Chr1g19100.1 5.7204772008752 5.2789685296439 6.486584556712871 0.585597 4.4855396648598065 -0.99202928889142 Two 2.91808295357122 Core
Chr1 6065439 6067088 VDAG_JR2_Chr1g19110.1 6.70625087370646 5.52284655707389 6.35590273727955 0.559733 7.215628728556558 -0.992353482286286 Two 1.21535377592432 Core
Chr1 6067518 6068958 VDAG_JR2_Chr1g19120.1 5.779938910230008 4.87798102610763 6.36394734165588 0.535417 3.3480304473563423 -0.990108178287454 Two -0.7891626882428041 Core
Chr1 6069869 6071737 VDAG_JR2_Chr1g19130.1 6.334313655669758 4.6251188153759415 6.51941582875196 0.606531 5.562977797099174 -0.9917976687660952 Two 1.28683550057748 Core
Chr1 6072191 6074273 VDAG_JR2_Chr1g19140.1 7.275478621165591 5.60042605773735 6.53781208190903 0.569645 4.4300051698958205 -0.987750393050539 Two -1.51628841181546 Core
Chr1 6074250 6075431 VDAG_JR2_Chr1g19150.1 7.2020059948809685 6.26575183972608 6.613568360192749 0.570703 8.738817354608871 -0.983786736563194 Two -0.821802387464637 Core
Chr1 6075164 6077199 VDAG_JR2_Chr1g19160.1 6.00865098280329 6.32313596828521 6.14918057982188 0.5636359999999999 3.299667746513092 -0.992551323714722 Two 1.54205807269349 Core
Chr1 6077465 6078195 VDAG_JR2_Chr1g19170.1 0.580095005201759 6.27209344046518 5.719425021661 0.478082 1.1982565819174902 -0.990524136436952 Three -4.66602904396632 Core
Chr1 6081067 6083564 VDAG_JR2_Chr1g19180.1 6.84576991682069 6.01564410167308 6.2286276702089 0.526632 5.970589980942849 -0.992770605032153 Two 3.63378528746948 Core
Chr1 6083681 6086482 VDAG_JR2_Chr1g19190.1 6.27359734417784 5.97770769604596 6.65514046832474 0.552303 2.6132846509573397 -0.9918603608179052 Two 1.12253397876248 Core
Chr1 6086669 6089688 VDAG_JR2_Chr1g19200.1 6.103046156730571 4.95393754165156 6.58834685112476 0.597549 6.266370653609247 -0.991843516176105 Two 1.99174082166744 Core
Chr1 6089825 6091184 VDAG_JR2_Chr1g19210.1 6.6577199413833705 5.93749300690915 6.484859161635669 0.6453270000000001 4.669130483862744 -0.990029502441551 Two 4.7175455 
Chr1 6091181 6093140 VDAG_JR2_Chr1g19220.1 6.47235692938862 5.3574846684315975 6.4049260031342685 0.544155 4.236266559463237 -0.9886999198793808 Two 3.48078934250933 Core
Chr1 6093407 6094078 VDAG_JR2_Chr1g19230.1 1.05445631944129 6.630044535832808 6.37380246356399 0.540984 1.5860386858120028 -0.9918086647743491 Three -2.28991327280535 Core
Chr1 6094161 6096368 VDAG_JR2_Chr1g19240.1 5.25408625395737 5.26099197947432 6.2555203058102204 0.612596 2.95352861057589 -0.992704170778315 Two 1.19463838736136 Core
Chr1 6096501 6098288 VDAG_JR2_Chr1g19250.1 6.373066305864941 5.614254216218621 6.37226639993109 0.588696 4.638923082968111 -0.991489336989357 Two 1.79374851412829 Core
Chr1 6099839 6101497 VDAG_JR2_Chr1g19260.1 6.52498316774364 4.9585871905272105 6.218979028831201 0.53076 3.0468464928262318 -0.990099323834832 Two 0.8892599076219201 Core
Chr1 6101501 6102353 VDAG_JR2_Chr1g19270.1 6.59754499047716 5.53621780665393 6.48084883112442 0.583333 5.546989399013923 -0.992340886716833 Two 0.19905255799253105 Core
Chr1 6102675 6104177 VDAG_JR2_Chr1g19280.1 5.8402011161450496 6.47859893170583 6.31056672779899 0.563249 8.850047539334497 -0.989728852820492 Two -0.426697952745767 Core
Chr1 6104772 6108177 VDAG_JR2_Chr1g19290.1 5.14054224162014 5.4398216696132184 5.795730073089241 0.5342140000000001 7.2287647373025825 -0.988374972263526 Two 3.8590827065115 Core
Chr1 6109357 6111371 VDAG_JR2_Chr1g19300.1 4.398679532954231 5.64030052865662 6.3783216494988295 0.569513 7.629348419540889 -0.9924679006062108 Two 5.9292564424586205 Core
Chr1 6114002 6116052 VDAG_JR2_Chr1g19310.1 2.94438758190158 5.5630282216450295 6.559097570441233 0.578537 6.84704990206241 -0.993800035644647 Two 1.50838247901071 Core
Chr1 6120982 6123314 VDAG_JR2_Chr1g19320.1 5.73791715375619 5.31963135307975 6.2705609755295 0.5741850000000001 3.6308164038152633 -0.993073467294254 Two 0.17414746994952202 Core
Chr1 6123405 6128329 VDAG_JR2_Chr1g19330.1 5.83442215010645 5.82198697336463 6.192898208819 0.560723 3.4277889310979432 -0.9923260721145792 Two 1.92485837495057 Core
Chr1 6129525 6130266 VDAG_JR2_Chr1g19340.1 0.5729869342487359 4.96624841685587 6.15028286399256 0.623482 1.7955160973275102 -0.987382745131693 Three -2.14319855131513 Core
Chr1 6130372 6132032 VDAG_JR2_Chr1g19350.1 6.55366532875957 5.54591290061083 6.0596824470187 0.5475899999999999 8.89420078373799 -0.993039692007082 Two 4.51873556063122 Core
Chr1 6133600 6135063 VDAG_JR2_Chr1g19360.1 6.47843793951967 5.93175185393551 5.929353283360079 0.522898 0.14050105962170592 -0.992398098448052 Two -11.97645 
Chr1 6136563 6150592 VDAG_JR2_Chr1g19370.1 5.98824730215374 5.721391181240059 5.9872023502535 0.535177 4.570144215857934 -0.99199936000963 Two 4.67614403811667 Core
Chr1 6151345 6154284 VDAG_JR2_Chr1g19380.1 5.6941273731468085 5.076353601311291 6.06431484407646 0.576387 6.731595389544946 -0.988640137835452 Two 3.7298320256704094 Core
Chr1 6155364 6159100 VDAG_JR2_Chr1g19390.1 6.118345123189441 6.08555436690096 5.932692675897781 0.525696 4.472153734829383 -0.992735920430323 Two 2.6533660416296203 Core
Chr1 6161474 6162473 VDAG_JR2_Chr1g19400.1 7.48627214809098 6.16568159852159 7.13559038504404 0.5335340000000001 2.4993266259883105 -0.9935832583281328 Two -0.3916712634919261 Core
Chr1 6162776 6164948 VDAG_JR2_Chr1g19410.1 6.17388145449332 5.8665773208236205 5.95817257957155 0.534991 7.2888246968786214 -0.98837571565485 Two 5.684584493866 Core
Chr1 6165332 6166039 VDAG_JR2_Chr1g19420.1 6.26952575647187 7.17059876335745 6.079283188248311 0.523338 0.19290511102799626 -0.9899317180836592 One -5.97798727606938 Core
Chr1 6166515 6168424 VDAG_JR2_Chr1g19430.1 5.899005208129518 5.54112184538826 6.33187691178621 0.558408 7.3180349628432095 -0.9912259805270552 Two 1.90802681444528 Core
Chr1 6168542 6169638 VDAG_JR2_Chr1g19440.1 0.411061799487992 5.936682768463348 6.33649984460482 0.548358 5.6416196254012565 -0.992976724267298 Three 0.170875421158216 Core
Chr1 6170952 6174149 VDAG_JR2_Chr1g19450.1 6.67772326901729 5.604955813702401 6.02028480382238 0.552393 8.39102441324016 -0.989185428406292 Two 6.40303285036204 Core
Chr1 6174439 6175415 VDAG_JR2_Chr1g19460.1 2.23326389701324 5.72811793092419 6.16879825098354 0.540984 6.316592035749504 -0.991005612756886 Three -4.04598434611637 Core
Chr1 6176881 6178196 VDAG_JR2_Chr1g19470.1 5.1321847658728 5.34116586410373 6.30450699181154 0.5825100000000001 1.417761123521556 -0.9902930160903928 Two -1.7453227023793405 Core
Chr1 6179852 6182429 VDAG_JR2_Chr1g19480.1 4.846034971129 6.31463545928874 5.8259306145591125 0.5172680000000001 5.024094991493985 -0.992170475775274 Two -0.5722423182786579 Core
Chr1 6182678 6184679 VDAG_JR2_Chr1g19490.1 4.69588561784305 5.64591267147672 6.5421465189127685 0.5467270000000001 6.382429196729791 -0.9921518928230808 Two 0.738770900355169 Core
Chr1 6183936 6184015 VDAG_JR2_Chr1g19500.1 7.814452987942821 6.783535513470151 7.47659982226753 0.6202529999999999 0.7016902949903437 -1.0 One -2.12642871038179 Core
Chr1 6184809 6185812 VDAG_JR2_Chr1g19510.1 6.856907625722622 5.6046425806956695 6.14797316997216 0.516451 1.9214078315828185 -0.983189380690749 Two -1.20382727404322 Core
Chr1 6186212 6187804 VDAG_JR2_Chr1g19520.1 6.21981340722116 4.990973608139769 5.95341821651225 0.53706 1.2490641051954083 -0.993120527615107 Two -1.5303286988491598 Core
Chr1 6189358 6193960 VDAG_JR2_Chr1g19530.1 6.46827019193333 5.739983948166 6.29864165608813 0.574098 1.9441552155776047 -0.992975151937257 Two -0.782248216474771 Core
Chr1 6194191 6196956 VDAG_JR2_Chr1g19540.1 6.3111399702235 5.2319605971042575 6.36912510816397 0.636166 4.005587161350864 -0.99226313108067 Two -0.449008906001879 Core
Chr1 6196935 6198426 VDAG_JR2_Chr1g19550.1 6.34359859790162 6.14445233200586 6.53271793279572 0.580148 5.132284794853574 -0.989928789531105 Two -0.669169730388958 Core
Chr1 6198631 6201286 VDAG_JR2_Chr1g19560.1 6.63899046271504 4.937905693624749 6.485290675272781 0.585687 3.7239355607518703 -0.988708467295199 Two 2.35498234216083 Core
Chr1 6201444 6202800 VDAG_JR2_Chr1g19570.1 5.91693692890485 5.07503639234442 6.282777601909809 0.6061949999999999 3.3316394211333726 -0.991293543484602 Two -0.61028717019085 Core
Chr1 6202688 6204428 VDAG_JR2_Chr1g19580.1 5.67951988437401 5.19437039612483 6.27996640296726 0.605747 4.226108985354573 -0.991991236006572 Two 1.3354738958610402 Core
Chr1 6204630 6209871 VDAG_JR2_Chr1g19590.1 6.52139997451033 5.234495536824321 6.26441998327216 0.5918720000000001 2.8311561679158994 -0.991343708661364 Two 1.37726514106008 Core
Chr1 6210136 6213681 VDAG_JR2_Chr1g19600.1 4.33351298071763 5.26414868377234 6.138048371267719 0.562764 6.5700847575137615 -0.990004382364555 Two 3.85013568753581 Core
Chr1 6217164 6218582 VDAG_JR2_Chr1g19610.1 5.09273585120793 4.80395392704691 6.34992763969643 0.620592 4.51232071577144 -0.991437986496576 Two 0.379285259038485 Core
Chr1 6219177 6221400 VDAG_JR2_Chr1g19620.1 6.03756463696988 5.17762105037468 6.4323710639722895 0.5542060000000001 7.144239245297303 -0.992334081755359 Two 3.18761383488608 Core
Chr1 6221565 6224399 VDAG_JR2_Chr1g19630.1 5.72490043824466 5.868574335978191 5.99242550950288 0.5462239999999999 3.8572822514503193 -0.9936857803672408 Two 2.55574357361602 Core
Chr1 6224501 6225702 VDAG_JR2_Chr1g19640.1 5.80874988192189 5.41788968296988 5.85824931555653 0.5370520000000001 4.488850894266116 -0.9938725962642728 Two 0.149576366453235 Core
Chr1 6225875 6227799 VDAG_JR2_Chr1g19650.1 5.90156437524834 5.38728569496657 5.936352148363018 0.569647 3.675864050504301 -0.99115170907905 Two -0.5635540160045649 Core
Chr1 6227779 6229612 VDAG_JR2_Chr1g19660.1 0.670246672047449 5.73037284770732 6.25945379215749 0.567921 0.7935670278140705 -0.9915282996879908 Three -2.18221119688313 Core
Chr1 6230206 6231708 VDAG_JR2_Chr1g19670.1 7.1784275800775 5.25388930452485 6.12819507864936 0.546605 3.3378592584823434 -0.989291109968243 Two -0.746613249614826 Core
Chr1 6231916 6234564 VDAG_JR2_Chr1g19680.1 5.6195835700110806 5.63690201419548 6.4661569382671 0.589879 5.0263302735004425 -0.9911045932404492 Two -0.305788023465492 Core
Chr1 6238122 6239978 VDAG_JR2_Chr1g19690.1 6.99697253602836 5.44239047648333 6.908832696650308 0.54903 1.7181738412495333 -0.9906714245822472 Two -0.6173266118136761 Core
Chr1 6239996 6242053 VDAG_JR2_Chr1g19700.1 6.71885521048321 5.11021944103154 6.56324792467386 0.567817 3.702758185547629 -0.991879439097527 Two 2.01391274877767 Core
Chr1 6242001 6243847 VDAG_JR2_Chr1g19710.1 4.14051565406398 5.23675605596818 6.106758502418059 0.562297 4.898056612424887 -0.991555565476032 Two 3.13239197747437 Core
Chr1 6244876 6246630 VDAG_JR2_Chr1g19720.1 0.497725892364685 5.928726972890461 5.84385460836169 0.529076 0.5100663049863051 -0.996153380814664 Three -3.08577040785891 Core
Chr1 6247694 6248837 VDAG_JR2_Chr1g19730.1 6.01207189538952 5.24683652562278 6.10044329609263 0.5529310000000001 7.30619791491619 -0.9898431141113008 Two 2.38097978369782 Core
Chr1 6248822 6249897 VDAG_JR2_Chr1g19740.1 6.57660116170854 5.19995225578641 6.29325388589024 0.5693020000000001 5.893299353400848 -0.9939499796719692 Two -0.35527283036968604 Core
Chr1 6249959 6252612 VDAG_JR2_Chr1g19750.1 6.160806670292669 4.910280536850482 6.3118463388406205 0.588014 3.9192860552116473 -0.991052364745362 Two 2.56161460978728 Core
Chr1 6253457 6257025 VDAG_JR2_Chr1g19760.1 5.60571921614812 5.7859940694801 6.197833833644428 0.539798 4.241679972304813 -0.9908915464835 Two 3.3135487982947898 Core
Chr1 6257132 6259905 VDAG_JR2_Chr1g19770.1 5.98668301733827 5.31742659198703 6.39358111470183 0.5769920000000001 6.377098738338617 -0.9855258877144828 Two 4.18150136741965 Core
Chr1 6260852 6263100 VDAG_JR2_Chr1g19780.1 4.57428787578834 5.05658996142324 6.403954792030951 0.578292 4.414042182272998 -0.991860655189984 Two 2.80645691231595 Core
Chr1 6264052 6266615 VDAG_JR2_Chr1g19790.1 1.4284997823955 5.07823717845074 6.54361015499815 0.5891529999999999 3.194196730173654 -0.993618950011562 Three -0.0975295228577361 Core
Chr1 6266586 6270371 VDAG_JR2_Chr1g19800.1 5.86717443144629 5.462581320972968 5.903019054780233 0.563012 6.681266069038963 -0.9921347649522272 Two 4.9508626637278 Core
Chr1 6272860 6274151 VDAG_JR2_Chr1g19810.1 1.26264279593348 5.05138548236778 6.384049583733572 0.538342 7.873393770451279 -0.988091185697272 Three 1.80863639477523 Core
Chr1 6273948 6274904 VDAG_JR2_Chr1g19820.1 7.30582054756845 5.80476299214511 6.45384737518688 0.553347 6.735011021671194 -0.980277681116912 Two 0.770289233898533 Core
Chr1 6274994 6276647 VDAG_JR2_Chr1g19830.1 1.20881478382381 5.366230016823111 6.18744498280118 0.5565640000000001 4.573308798239869 -0.983601834813386 Three 1.59592654441394 Core
Chr1 6277096 6278916 VDAG_JR2_Chr1g19840.1 5.8019951857576 5.57001473138573 6.07411408222984 0.556593 1.0870646878953356 -0.994628495038758 Two -1.8142534606562 Core
Chr1 6280596 6283796 VDAG_JR2_Chr1g19850.1 4.89685477967516 5.2825513317028605 6.31778787397716 0.584687 6.743332912251438 -0.989905975052952 Two 2.2989151132872703 Core
Chr1 6284331 6288664 VDAG_JR2_Chr1g19860.1 6.503402878914031 5.6427653251575896 6.31659411089987 0.563813 5.9402135771167455 -0.993972993589728 Two 4.39204229471085 Core
Chr1 6289264 6291748 VDAG_JR2_Chr1g19870.1 5.74954494204454 5.9204673097236205 6.552279532751548 0.5499189999999999 0.8624724818960754 -0.992018620445262 Two -1.63515371590173 Core
Chr1 6298552 6301441 VDAG_JR2_Chr1g19880.1 5.85560162706658 5.20749493755099 6.43265601597762 0.592939 6.050640641228615 -0.9928846162224771 Two -0.4808275045447771 Core
Chr1 6305108 6306255 VDAG_JR2_Chr1g19890.1 4.52672087650604 3.78471725468753 6.48087250341807 0.675676 4.337807605506498 -0.991951471226454 Two 1.66294752483214 Core
Chr1 6306516 6310002 VDAG_JR2_Chr1g19900.1 7.4071535008271505 5.09682389431571 6.21812083061317 0.6041310000000001 5.562739455254841 -0.993193702142642 Two 2.83042993864278 Core
Chr1 6310010 6311666 VDAG_JR2_Chr1g19910.1 5.31602465897682 5.1261920458424415 6.3433797154734695 0.6292270000000001 4.355744755398951 -0.992130423759824 Two -0.0810357590448734 Core
Chr1 6312718 6314945 VDAG_JR2_Chr1g19920.1 5.12550534413234 4.94572245771972 6.429393530576639 0.629546 2.0942159344899043 -0.991961532658183 Two 0.230691682794501 Core
Chr1 6315272 6318570 VDAG_JR2_Chr1g19930.1 5.87346474119852 5.533357880138412 6.14838202869817 0.5748939999999999 3.131677447705055 -0.9926143016878228 Two 1.9935426834063896 Core
Chr1 6320698 6323040 VDAG_JR2_Chr1g19940.1 6.22387432550417 5.24121943441077 6.31520779010891 0.591375 6.2029404677462185 -0.993024829083662 Two 3.7665683409071296 Core
Chr1 6324007 6326033 VDAG_JR2_Chr1g19950.1 5.44109598480445 5.1414738717962 6.462614652800831 0.589832 6.3131991228832725 -0.9910757166816992 Two 0.46174980106012 Core
Chr1 6326370 6328406 VDAG_JR2_Chr1g19960.1 0.916329878185311 5.50703468731228 6.09409668904621 0.552554 4.020180767582024 -0.992153154481448 Three 0.34915882370111706 Core
Chr1 6329250 6331588 VDAG_JR2_Chr1g19970.1 1.51322093666031 5.24562563350576 6.52857881934782 0.5829770000000001 3.8649509053888047 -0.988082156715726 Three 2.33830355676034 Core
Chr1 6333263 6335030 VDAG_JR2_Chr1g19980.1 6.04937669600178 5.697613969817481 6.009863703007669 0.569892 0.5418615374795316 -0.99249376537243 Two -2.67900308192763 Core
Chr1 6337168 6340019 VDAG_JR2_Chr1g19990.1 5.733718292059409 4.694377045736911 6.4326239589676115 0.620835 7.053035953089683 -0.9914166843741372 Two 4.889834155057209 Core
Chr1 6339893 6341827 VDAG_JR2_Chr1g20000.1 7.08623987571949 4.64110309007337 7.08782108529873 0.6644260000000001 2.6541513506530934 -0.988255470444588 Two 0.7191784921121921 Core
Chr1 6342481 6344766 VDAG_JR2_Chr1g20010.1 6.79511546156458 5.19956833007592 6.437563825845469 0.663457 3.1138086706319155 -0.991987178443406 Two 0.441334925068146 Core
Chr1 6346112 6348066 VDAG_JR2_Chr1g20020.1 6.195728396142192 8.0037810045367 5.7757793553750085 0.511771 0.4395823701083667 -0.992849966577293 One -3.28982429461065 Core
Chr1 6349726 6350448 VDAG_JR2_Chr1g20030.1 6.81501571835245 7.043086645947549 6.452759445564902 0.623269 0.0 -0.993630475124273 One -16.82174 
Chr1 6351036 6353418 VDAG_JR2_Chr1g20040.1 6.02596840156485 5.39107251953307 6.64651355156053 0.572628 1.2123237150313084 -0.99406365358876 Two -2.85776929398246 Core
Chr1 6354615 6356618 VDAG_JR2_Chr1g20050.1 6.344677112493629 5.01381323830051 6.766678582459379 0.600599 2.6152860473451756 -0.991032169782492 Two -1.29134936059179 Core
Chr1 6357359 6359237 VDAG_JR2_Chr1g20060.1 5.5059705417161116 5.13394748122409 6.96559941084382 0.576677 1.7372952469997895 -0.991508276048432 Two -0.5095541607091579 Core
Chr1 6360129 6361099 VDAG_JR2_Chr1g20070.1 7.74939806370316 5.436128532314839 6.48982141047928 0.531959 0.07259895683436429 -0.992285034871995 Two -12.083573 
Chr1 6364409 6366614 VDAG_JR2_Chr1g20080.1 5.77899744804354 5.47112378143299 6.38395030651521 0.579592 6.618270635822947 -0.99165265728648 Two 0.527628891551235 Core
Chr1 6369370 6370538 VDAG_JR2_Chr1g20090.1 5.386575922318372 4.43791016618307 6.8752169819242575 0.590753 1.1579988266531198 -0.987026722579039 Two -2.99368844899305 Core
Chr1 6370675 6373851 VDAG_JR2_Chr1g20100.1 5.44074165262233 5.1664064374134 6.63707511493749 0.578715 1.5201155004201419 -0.99129381312184 Two -0.18946964197775604 Core
Chr1 6374113 6376663 VDAG_JR2_Chr1g20110.1 7.58708534794638 5.6407986569953295 6.44896301541956 0.554902 1.505687897993185 -0.992005943857148 Two -0.7398682161194811 Core
Chr1 6376970 6380159 VDAG_JR2_Chr1g20120.1 6.18649709541011 5.81663926830461 6.26261746878854 0.568517 1.3840034243488577 -0.990697032057294 Two -0.312944484787527 Core
Chr1 6380310 6381595 VDAG_JR2_Chr1g20130.1 7.069075550572599 5.75028764520866 6.237648661066443 0.545525 5.354982936287894 -0.993063952789624 Two -1.00807111404137 Core
Chr1 6381796 6383997 VDAG_JR2_Chr1g20140.1 2.8879469063950896 5.980313077084969 6.51012757573479 0.627442 4.935266300119153 -0.992277526354279 Two -1.4111568689074998 Core
Chr1 6384034 6386303 VDAG_JR2_Chr1g20150.1 5.67694661701695 5.52055615424233 6.42085392361434 0.604672 4.167059791418882 -0.990893159280683 Two 0.170676049941439 Core
Chr1 6386503 6388727 VDAG_JR2_Chr1g20160.1 7.23948742358892 4.523083993415809 6.45919974125178 0.619155 3.9298100935311537 -0.993391324043895 Two 1.32925573368312 Core
Chr1 6388839 6390893 VDAG_JR2_Chr1g20170.1 6.9720234727607 5.711605039792299 6.3512416623670696 0.582765 3.0467363104864607 -0.992131285074324 Two 1.2081107435732 Core
Chr1 6390806 6391864 VDAG_JR2_Chr1g20180.1 0.751042978845361 5.20876442417586 6.66289834155517 0.569943 2.99547512008246 -0.992838592944062 Three 0.452088095098195 Core
Chr1 6393780 6396723 VDAG_JR2_Chr1g20190.1 7.45597482763129 7.653293485850768 6.173176030953 0.550459 0.07185322085220641 -0.9935770320171392 One -5.36063951420972 Core
Chr1 6404136 6406099 VDAG_JR2_Chr1g20200.1 4.00836183645249 5.55665168184356 6.713410651402231 0.598064 7.565557333973197 -0.9868246112522672 Two 5.85601963716368 Core
Chr1 6406070 6408232 VDAG_JR2_Chr1g20210.1 6.91676922673355 5.71307686414177 6.38633046776614 0.56013 2.4953277823088014 -0.989275938510874 Two 0.6620510862566391 Core
Chr1 6408719 6410277 VDAG_JR2_Chr1g20220.1 7.58041702367402 5.06611349738942 6.2756540402374 0.561617 3.3070491909738986 -0.990504802891537 Two -0.771846708435356 Core
Chr1 6410979 6412149 VDAG_JR2_Chr1g20230.1 6.11369606674516 5.59335229431932 6.27886582744079 0.5717949999999999 3.833695209797189 -0.992385476477835 Two 1.22090310816312 Core
Chr1 6412881 6415359 VDAG_JR2_Chr1g20240.1 7.29341256487974 5.78640862912094 6.38089694748102 0.552462 2.2725096323082257 -0.991037445507218 Two 0.5881953877577321 Core
Chr1 6415540 6417681 VDAG_JR2_Chr1g20250.1 5.50409498674842 6.131554819338371 6.11871102016989 0.5347970000000001 3.499518734735052 -0.991544889561554 Two 1.57845381008912 Core
Chr1 6417887 6419369 VDAG_JR2_Chr1g20260.1 6.98364434748294 6.220558981923928 6.144230343076072 0.548583 9.549247913092982 -0.9913200479851392 Two 5.5846688396393205 Core
Chr1 6419459 6421688 VDAG_JR2_Chr1g20270.1 6.5651621714825 5.72671772324438 6.48374977126716 0.557649 3.84457086232875 -0.993202303863646 Two -0.598643810878572 Core
Chr1 6422026 6425072 VDAG_JR2_Chr1g20280.1 5.5553241519302 5.6641812908129 6.589789810828751 0.585358 5.03389241202268 -0.9891295191058408 Two 1.49138146479082 Core
Chr1 6426203 6430715 VDAG_JR2_Chr1g20290.1 6.9202570861358605 5.806469223931072 6.27244671728008 0.56383 3.2819261734708114 -0.993370061038452 Two 1.6564484235037602 Core
Chr1 6431859 6434067 VDAG_JR2_Chr1g20300.1 6.1604322532337 5.543577585230429 6.34529922369361 0.560236 8.577368614133997 -0.9859497380426492 Two 3.573690817491129 Core
Chr1 6434163 6440698 VDAG_JR2_Chr1g20310.1 5.30913319311495 5.24248081539241 6.02186127489553 0.549044 3.959334184184252 -0.992479884714414 Two 2.06615127393182 Core
Chr1 6440919 6444326 VDAG_JR2_Chr1g20320.1 6.04689706783741 5.39998850636446 6.280462984702389 0.568242 3.208754544830055 -0.990049704191712 Two 2.02070563581242 Core
Chr1 6444361 6445881 VDAG_JR2_Chr1g20330.1 8.1320690866154 5.460726997394871 6.395859582310539 0.575 6.272210233024371 -0.9868973776571468 Two 0.977980803803573 Core
Chr1 6447557 6450573 VDAG_JR2_Chr1g20340.1 7.371584378845401 5.49430210514621 6.53370518531529 0.5885279999999999 5.846016760461709 -0.991540952551086 Two 4.74451850883691 Core
Chr1 6450472 6452592 VDAG_JR2_Chr1g20350.1 4.655413335946999 5.11227829668239 6.55130218708179 0.599528 4.108543714557523 -0.990311841284755 Two 1.51740050633327 Core
Chr1 6453205 6456443 VDAG_JR2_Chr1g20360.1 6.79471066046708 4.58613159985034 6.74811651384513 0.598518 3.017574577193764 -0.99257098091867 Two -1.34948752169026 Core
Chr1 6457139 6458895 VDAG_JR2_Chr1g20370.1 7.21459888046409 5.05631393115054 6.33634450262316 0.605353 3.1683369610852816 -0.9908215465570328 Two -1.30761364234749 Core
Chr1 6459495 6462318 VDAG_JR2_Chr1g20380.1 7.08640146855765 5.95751033710919 5.871906589939751 0.525328 0.18998518694231345 -0.9911339732111 Two -4.1840776802166815 Core
Chr1 6462553 6464639 VDAG_JR2_Chr1g20390.1 4.99236138099484 5.72881608681275 6.37307861979095 0.5795779999999999 6.3681063057685385 -0.991562366993871 Two 2.8835661079581296 Core
Chr1 6464975 6473508 VDAG_JR2_Chr1g20400.1 4.63944800202993 4.99408161728516 6.25293418062668 0.573186 4.335930279052543 -0.991522111789686 Two 2.23977214359628 Core
Chr1 6473961 6476400 VDAG_JR2_Chr1g20410.1 4.5094729508454 5.4101319957531295 6.41806328113492 0.5916359999999999 4.248125477534809 -0.991611517785564 Two 1.80080524225292 Core
Chr1 6476737 6478531 VDAG_JR2_Chr1g20420.1 4.85771315862 5.89173839797302 6.958517298040639 0.567447 1.4894459806100309 -0.991479758021686 Two -0.985717312362775 Core
Chr1 6478913 6480415 VDAG_JR2_Chr1g20430.1 6.33312509851617 5.6069926065934 6.9665728768695585 0.557257 1.465870624121467 -0.990452349069739 Two -1.3132423313061998 Core
Chr1 6480791 6483994 VDAG_JR2_Chr1g20440.1 5.49164896948596 5.52004566218724 6.395206560446041 0.566032 7.7992814884075905 -0.991224233241552 Two 4.873884883031809 Core
Chr1 6485412 6487330 VDAG_JR2_Chr1g20450.1 7.20699092079947 5.96662869609556 6.30854397006551 0.572993 0.1095558201952588 -0.990880160033274 Two -4.66336488383366 Core
Chr1 6488403 6491100 VDAG_JR2_Chr1g20460.1 3.84767671360614 5.17142005494655 6.35975778836934 0.601038 0.3324414458997095 -0.991099629882362 Two -3.2945541038807704 Core
Chr1 6491636 6492698 VDAG_JR2_Chr1g20470.1 7.18579490018852 5.89123864375064 6.271403659173631 0.59322 3.2613904870963304 -0.989951337199746 Two -0.44455947833038 Core
Chr1 6494772 6495740 VDAG_JR2_Chr1g20480.1 7.87441743670017 5.75684821699144 6.54908399009043 0.5754130000000001 2.2665911312863742 -0.991987974368043 Two -0.8166794920478461 Core
Chr1 6496573 6497715 VDAG_JR2_Chr1g20490.1 6.03436024780167 5.410568640685249 6.45256137117298 0.565674 6.599897861060518 -0.9935895943071972 Two 3.97830934335766 Core
Chr1 6498808 6502868 VDAG_JR2_Chr1g20500.1 6.10086675017462 4.61395660039803 6.324446736257241 0.6229060000000001 1.4780462149692195 -0.990610980270653 Two 0.128897533593099 Core
Chr1 6504500 6507093 VDAG_JR2_Chr1g20510.1 6.286432108430951 5.62273659161465 6.133632908427909 0.582723 6.1954740576094105 -0.990943636427467 Two 4.846897836747671 Core
Chr1 6508909 6512844 VDAG_JR2_Chr1g20520.1 5.25847866772876 5.50251549582944 6.33938550552721 0.571029 7.940654737186938 -0.992183037654721 Two 5.385689697858711 Core
Chr1 6513946 6515975 VDAG_JR2_Chr1g20530.1 6.06749660528842 6.30757152482142 6.0075902560327 0.529818 8.971418595313569 -0.9914597084337592 Two 7.3057625952068195 Core
Chr1 6516245 6519982 VDAG_JR2_Chr1g20540.1 6.25211518717525 5.17568249834994 6.38449169620522 0.6272409999999999 4.107630821868079 -0.9945032983860692 Two 2.28740711772693 Core
Chr1 6520773 6523256 VDAG_JR2_Chr1g20550.1 6.81890726288968 5.64736872134184 6.084584703194031 0.565042 1.5699838830654895 -0.99077836867784 Two -0.482607594237143 Core
Chr1 6523826 6526146 VDAG_JR2_Chr1g20560.1 5.96256552690468 6.21600557325401 6.311936050466289 0.620259 2.285486593841876 -0.990980727884363 Two -0.497029878989088 Core
Chr1 6526202 6527144 VDAG_JR2_Chr1g20570.1 0.821397056813305 4.6920695098611 6.4374177149317084 0.617834 5.307706859294601 -0.992955289973501 Three -0.6810651468465009 Core
Chr1 6527364 6529533 VDAG_JR2_Chr1g20580.1 4.29696753977588 5.44063482328622 6.4545502283785705 0.591517 5.254251747612765 -0.994385873419672 Two 3.66343021087717 Core
Chr1 6530010 6537612 VDAG_JR2_Chr1g20590.1 5.980020194980121 5.3052047317400985 6.33939761179326 0.570902 8.089105386107452 -0.9907505997284872 Two 5.19902083796123 Core
Chr1 6538475 6539065 VDAG_JR2_Chr1g20600.1 7.20321980331613 5.57817988703306 7.60739880933329 0.591525 2.044879309282619 -0.9914125041632758 Two -2.34118634080057 Core
Chr1 6539450 6546031 VDAG_JR2_Chr1g20610.1 5.51034928530706 5.44095475802029 6.22948454614789 0.578635 7.7349379134118275 -0.9909788713655 Two 6.799487712361669 Core
Chr1 6547663 6549484 VDAG_JR2_Chr1g20620.1 7.768613551676119 4.75742741514933 6.68227833887797 0.595826 7.224698920056924 -0.980735525737011 Two 1.09448379857078 Core
Chr1 6550040 6551379 VDAG_JR2_Chr1g20630.1 4.98920369628604 5.899719567491701 6.0033229835013096 0.551904 0.8051615047284101 -0.995336111107784 Two -2.74214852414976 Core
Chr1 6551903 6552978 VDAG_JR2_Chr1g20640.1 6.6216147558709 6.25137181678886 6.586523417494299 0.517209 1.5849784264812958 -0.99458819606399 Two -1.56739376406049 Core
Chr1 6553069 6554679 VDAG_JR2_Chr1g20650.1 6.7374236285792986 5.102822961060482 6.45165697534836 0.592547 7.908786905724942 -0.9914039763116148 Two 5.91278780922267 Core
Chr1 6555083 6556599 VDAG_JR2_Chr1g20660.1 6.455376028371051 5.33390702927144 6.5504065492846 0.614116 4.273668173916031 -0.99260154767884 Two 2.10737010900472 Core
Chr1 6557573 6560191 VDAG_JR2_Chr1g20670.1 5.24742807821304 5.92294443145383 6.4252768309368085 0.572574 5.309580768695759 -0.990536298060351 Two 3.9766792064481096 Core
Chr1 6560562 6562360 VDAG_JR2_Chr1g20680.1 6.21230770136317 5.491558165219951 6.47504286741211 0.581757 4.958422170916107 -0.9910897052118092 Two 0.6471679981060009 Core
Chr1 6562575 6565500 VDAG_JR2_Chr1g20690.1 5.71452289045435 5.512461941657442 6.529124756192419 0.605812 4.12009077062611 -0.991719202158389 Two 1.00547025532102 Core
Chr1 6565531 6568445 VDAG_JR2_Chr1g20700.1 6.31713634472758 5.3854120283457805 6.362217624765201 0.581331 4.702243502482563 -0.993193038293273 Two 1.63220499530095 Core
Chr1 6570776 6575571 VDAG_JR2_Chr1g20710.1 4.64165399670357 4.915909431339469 6.25887382541078 0.592909 1.5426820292208978 -0.992629639957132 Two 0.5089306296072801 Core
Chr1 6576094 6577411 VDAG_JR2_Chr1g20720.1 6.52914543685539 5.12366966445385 6.399893255473289 0.592255 5.012984447219021 -0.991983893582039 Two 0.259726058201232 Core
Chr1 6578972 6580150 VDAG_JR2_Chr1g20730.1 5.06660282806411 5.5993711067001 6.40830366307996 0.57725 5.613768290903778 -0.99271019429428 Two -0.522280346475985 Core
Chr1 6581145 6584850 VDAG_JR2_Chr1g20740.1 6.6548224473558 5.50754910308775 6.29224730986969 0.578408 4.774771985467498 -0.992769419232498 Two 2.97350853474268 Core
Chr1 6585046 6585627 VDAG_JR2_Chr1g20750.1 1.51885617122215 5.14373087309296 6.6463203793705 0.521515 3.271963739265081 -0.990583775163866 Three -0.369098568702202 Core
Chr1 6586063 6587639 VDAG_JR2_Chr1g20760.1 6.88728749977375 5.66443828332744 6.0823284221276 0.560914 0.0 -0.993531471568814 Two -11.860152 
Chr1 6587981 6592509 VDAG_JR2_Chr1g20770.1 6.73564132772932 5.38682740343755 6.52921713970448 0.567138 4.266475794848112 -0.993389043382261 Two 3.68352415288261 Core
Chr1 6593504 6598308 VDAG_JR2_Chr1g20780.1 6.2953951568713205 5.13164748891234 6.291267011436571 0.583888 3.1632521610453765 -0.990207653974654 Two 2.5933600608216096 Core
Chr1 6598501 6602555 VDAG_JR2_Chr1g20790.1 6.28382319331357 5.40673289013302 6.0909355957483315 0.566601 2.1443489664718407 -0.99327038561951 Two 0.186157344903159 Core
Chr1 6602450 6604559 VDAG_JR2_Chr1g20800.1 4.58236022551218 5.76690364280035 6.37026125458439 0.581318 5.1289380160205935 -0.9932863087900742 Two 0.7724266621449691 Core
Chr1 6605066 6606562 VDAG_JR2_Chr1g20810.1 5.93968847190995 5.70208978833565 6.71704369431517 0.55615 2.408372787518396 -0.9904200135387392 Two -0.952269521682792 Core
Chr1 6606911 6607958 VDAG_JR2_Chr1g20820.1 7.17550930206476 5.79394071988768 6.95610270458542 0.544413 0.13176725179904772 -0.992418821015598 Two -11.885373 
Chr1 6611033 6615130 VDAG_JR2_Chr1g20830.1 6.54023955263332 5.91337556809518 6.228591724249362 0.534537 2.2141453460762928 -0.9921295965246708 Two -1.91364433763006 Core
Chr1 6615068 6617415 VDAG_JR2_Chr1g20840.1 5.1677511254029005 5.73418884805699 6.44441038629946 0.616532 3.5446018658844904 -0.992364150003118 Two 1.04682676247299 Core
Chr1 6617637 6619136 VDAG_JR2_Chr1g20850.1 5.464188163542942 5.23796842432473 6.245164196153048 0.5497 5.357421651551992 -0.991034289993774 Two 2.2597596708861296 Core
Chr1 6619637 6622655 VDAG_JR2_Chr1g20860.1 4.82861337281176 5.48550123613544 6.1567016564586785 0.572233 3.725373643560152 -0.989665601202676 Two 2.5110110286172502 Core
Chr1 6622919 6624287 VDAG_JR2_Chr1g20870.1 6.0723914539690105 5.357076942003991 6.55049321994877 0.611842 6.2235005996301815 -0.990435135964466 Two 0.548086680970022 Core
Chr1 6624790 6626429 VDAG_JR2_Chr1g20880.1 0.732346924875606 5.57757957701344 6.73740199425375 0.6186699999999999 5.559575439903981 -0.9838740492191392 Three 3.562541508348009 Core
Chr1 6627273 6629307 VDAG_JR2_Chr1g20890.1 5.51615057126181 5.20153704189429 6.52518046272815 0.580629 3.1856809583229664 -0.9897145066609648 Two 0.410518232738195 Core
Chr1 6629282 6631322 VDAG_JR2_Chr1g20900.1 0.9149993127662328 5.20214457554954 6.18744692299387 0.585784 3.95744906048653 -0.991390885164492 Three 2.29451822895028 Core
Chr1 6631146 6632452 VDAG_JR2_Chr1g20910.1 0.35236904047053097 5.21085684680982 6.841339767918449 0.627106 5.14074701838043 -0.9846302341687588 Three 1.9674116837289095 Core
Chr1 6633442 6634937 VDAG_JR2_Chr1g20920.1 3.382048214105 5.1205072296077 6.45447393908023 0.589298 3.513865774127667 -0.9916977822417908 Two 0.3257676451670201 Core
Chr1 6634975 6636701 VDAG_JR2_Chr1g20930.1 3.093568923919689 5.413271257972291 6.23145926037372 0.55562 5.0498963772921766 -0.995244333287422 Two 2.09195561642102 Core
Chr1 6636699 6638192 VDAG_JR2_Chr1g20940.1 6.4771821690539895 6.05930212403829 5.915623049892808 0.539853 4.433596873225099 -0.9879952209573392 Two 2.3037413907512403 Core
Chr1 6638352 6640206 VDAG_JR2_Chr1g20950.1 4.5126579521895 5.199714466030709 6.316056597192483 0.599245 4.740471582305061 -0.9900933166454492 Two 0.49396504045432 Core
Chr1 6640165 6642614 VDAG_JR2_Chr1g20960.1 5.78516171386913 4.86152183074568 6.34236312737449 0.62842 5.093463515998983 -0.9894430998779592 Two 0.826347465432181 Core
Chr1 6644565 6645635 VDAG_JR2_Chr1g20970.1 5.410543782022558 5.1792470859484405 7.26196401106668 0.614953 2.3800256767091366 -0.9915842550640022 Two -0.57989093929964 Core
Chr1 6645874 6648691 VDAG_JR2_Chr1g20980.1 5.72644401493863 5.50433697088629 6.28259481881554 0.5363859999999999 2.753048140582856 -0.994092809372244 Two 1.38741281557546 Core
Chr1 6648794 6649602 VDAG_JR2_Chr1g20990.1 0.533232499738856 5.32316060649219 7.2931987515595695 0.591584 0.16756391158658426 -0.994353436858858 Three -6.88501115271346 Core
Chr1 6653754 6654957 VDAG_JR2_Chr1g21000.1 4.96968350415825 5.6246410920562315 6.56436240440768 0.546135 0.8069368360933403 -0.9886677570104307 Two -4.58640359132641 Core
Chr1 6656586 6658543 VDAG_JR2_Chr1g21010.1 4.54471211268749 6.14857373511145 5.874649389661468 0.518651 5.442873451475512 -0.9943256759067248 Two 3.69950411344054 Core
Chr1 6658492 6659821 VDAG_JR2_Chr1g21020.1 6.01384139057328 5.94115432830068 6.04599799590796 0.519187 4.854984916008791 -0.993232881140677 Two 2.498259865416 Core
Chr1 6660315 6661589 VDAG_JR2_Chr1g21030.1 5.19904941890722 5.392411810640921 6.30220536741171 0.594192 7.749980419613485 -0.991551537794059 Two 4.44963358612271 Core
Chr1 6662004 6663371 VDAG_JR2_Chr1g21040.1 4.81884715549455 5.47380393262219 6.411044097997348 0.5713239999999999 5.937973246738751 -0.994041519497572 Two 1.80270574005256 Core
Chr1 6665583 6666941 VDAG_JR2_Chr1g21050.1 4.27487727612372 4.21724903199055 6.732566194207232 0.614875 5.559242733939632 -0.991154794565557 Two 2.33377408450594 Core
Chr1 6667125 6668471 VDAG_JR2_Chr1g21060.1 1.05223151957118 5.179499113078268 7.1800431579059 0.604755 2.510011301187494 -0.9936012829425692 Three -0.0701178486255634 Core
Chr1 6668529 6670767 VDAG_JR2_Chr1g21070.1 7.31483410571625 5.86286879784147 6.16714768602805 0.5178729999999999 2.953760102849684 -0.984332569560139 Two 1.25234645280256 Core
Chr1 6670740 6673322 VDAG_JR2_Chr1g21080.1 6.7042070055175484 5.4307156695258785 6.0342026990172695 0.560806 1.2592741520595778 -0.992737776219895 Two -0.7979198871964209 Core
Chr1 6674034 6675824 VDAG_JR2_Chr1g21090.1 4.88072836476315 5.62602731345451 6.256566275903491 0.551397 1.1379577604815574 -0.989687178798466 Two -1.5632290275192902 Core
Chr1 6675954 6678366 VDAG_JR2_Chr1g21100.1 4.84360987432176 5.087326809305299 6.38194573476624 0.552653 1.5584239757854006 -0.989464402837823 Two -0.544757457191916 Core
Chr1 6678760 6680657 VDAG_JR2_Chr1g21110.1 5.59770239588112 5.927891007652191 6.43295529237983 0.555087 7.441841190563794 -0.991987479948616 Two 1.4613438807656003 Core
Chr1 6681973 6686572 VDAG_JR2_Chr1g21120.1 5.55816214549361 6.0163745321593405 6.0569457183614 0.539465 2.9336314218598467 -0.989906476732802 Two 2.25054034469488 Core
Chr1 6686643 6687352 VDAG_JR2_Chr1g21130.1 0.0 5.7778968079692605 6.30527030738757 0.5359659999999999 3.935104241423192 -0.9917014724261288 Three -1.3801209713853602 Core
Chr1 6687255 6688747 VDAG_JR2_Chr1g21140.1 7.27854055176957 5.97001156014639 6.20854949991056 0.560992 7.129520961305428 -0.9922054596991752 Two 1.05236922739766 Core
Chr1 6688931 6691339 VDAG_JR2_Chr1g21150.1 5.82444270836235 5.21616685391318 6.30722433517874 0.582226 4.976375684219394 -0.991133540761456 Two 1.0699633388469498 Core
Chr1 6691417 6693272 VDAG_JR2_Chr1g21160.1 1.11680624967741 5.03328383683534 6.55238666684706 0.5859840000000001 3.206244426809698 -0.988143875412036 Three -1.26691205476967 Core
Chr1 6693491 6695753 VDAG_JR2_Chr1g21170.1 4.506108943523191 4.96981606324192 6.559076850913218 0.639699 2.6684334000495253 -0.98801330196877 Two -1.50387202463445 Core
Chr1 6699653 6700832 VDAG_JR2_Chr1g21180.1 6.12830652653548 5.582526948012768 6.801451600266137 0.563189 1.495700056755538 -0.99424282005816 Two -3.41286823320437 Core
Chr1 6702709 6704030 VDAG_JR2_Chr1g21190.1 0.864367701796384 5.60460122652891 7.03774365169422 0.5692659999999999 0.15533095131976907 -0.987314000676816 Three -5.42574112532876 Core
Chr1 6707627 6711347 VDAG_JR2_Chr1g21200.1 5.46983933039481 5.752848142970201 6.3572530301063095 0.546774 5.8661770150667065 -0.989811061166307 Two 1.89677417785343 Core
Chr1 6711607 6713919 VDAG_JR2_Chr1g21210.1 5.37419354718875 4.412964020938049 6.7417804097558784 0.6124569999999999 4.926396980336128 -0.989474820137289 Two 3.42792076890631 Core
Chr1 6714133 6715812 VDAG_JR2_Chr1g21220.1 4.407916730552599 4.8812075587256105 6.69428749430632 0.605718 6.349328469426885 -0.987522150928842 Two 4.407118269145339 Core
Chr1 6716039 6720509 VDAG_JR2_Chr1g21230.1 3.28239256931216 5.53587984573835 6.1406110900351205 0.56868 2.2826966692511093 -0.991323762779656 Two 0.4861088731914289 Core
Chr1 6722564 6725581 VDAG_JR2_Chr1g21240.1 6.93305021581637 4.817451996075981 6.530385275266888 0.649652 2.891099628066653 -0.987787281890707 Two -0.239238448013049 Core
Chr1 6725768 6730391 VDAG_JR2_Chr1g21250.1 4.90291530939462 5.16742947397463 6.72366555318763 0.650876 2.2410449278474296 -0.990609946068292 Two 0.483746186666927 Core
Chr1 6730421 6731547 VDAG_JR2_Chr1g21260.1 7.44522718440977 5.62531644909961 6.70216340198768 0.57016 1.16277041981645 -0.9933986384614992 Two -2.28991327280535 Core
Chr1 6732857 6735088 VDAG_JR2_Chr1g21270.1 6.07120062023157 5.389565343963 7.355652972563809 0.580009 1.1837097404833192 -0.990090540557254 Two -1.14811026494243 Core
Chr1 6735222 6737817 VDAG_JR2_Chr1g21280.1 5.2009710447749 5.9208428541265095 6.39556286473264 0.5591520000000001 4.749763466792643 -0.9899377840507672 Two 3.39324945007152 Core
Chr1 6737836 6738860 VDAG_JR2_Chr1g21290.1 5.603889843518491 5.8315242016065705 6.50858942412332 0.584961 3.661095775502168 -0.989396486769987 Two 0.9002120107077809 Core
Chr1 6738874 6740376 VDAG_JR2_Chr1g21300.1 6.94487405364756 4.6025946216952 6.5670014974534405 0.6111850000000001 6.335941815795412 -0.992570169675391 Two 4.2234672904076405 Core
Chr1 6740677 6743111 VDAG_JR2_Chr1g21310.1 4.464602703467151 5.25563129657057 6.6252952489974 0.612161 5.803606258985282 -0.990582710830345 Two 2.5214301060422004 Core
Chr1 6743271 6745939 VDAG_JR2_Chr1g21320.1 5.38881339796696 5.38136661224842 6.7260514521742785 0.570465 4.579013128034687 -0.9920410148959352 Two 0.787775098755351 Core
Chr1 6746065 6752411 VDAG_JR2_Chr1g21330.1 5.88861849116604 5.11132004898069 6.3585289088224615 0.589348 2.3945467528284197 -0.9916251549702578 Two 1.09497811267485 Core
Chr1 6754110 6755458 VDAG_JR2_Chr1g21340.1 6.84442426038384 6.377902868389809 7.162360913983929 0.5645399999999999 1.5654835650229455 -0.989744438485025 Two -1.23508155649258 Core
Chr1 6755995 6761354 VDAG_JR2_Chr1g21350.1 6.58795234705145 5.383279162537381 6.215462447185861 0.560179 3.001510931983114 -0.9889381891735248 Two 2.55083748455846 Core
Chr1 6761650 6768070 VDAG_JR2_Chr1g21360.1 6.43536573670179 5.76621783677042 6.01987205849 0.541745 3.9297507380037118 -0.992322401239621 Two 3.8277633027818494 Core
Chr1 6768400 6769229 VDAG_JR2_Chr1g21370.1 6.80914867252532 5.505758190137169 6.130071677064638 0.552473 4.072185188235594 -0.9950436995368548 Two 0.23432040600520496 Core
Chr1 6768963 6770249 VDAG_JR2_Chr1g21380.1 1.26591051123346 3.6870018919152896 6.32860812220422 0.614308 6.2546931328159285 -0.993977179585641 Three 3.0852376226154195 Core
Chr1 6770296 6771836 VDAG_JR2_Chr1g21390.1 6.4980829922890315 5.547221967238518 6.48254587128942 0.61948 5.368236221978647 -0.990013607742954 Two -0.498981183301918 Core
Chr1 6771680 6772711 VDAG_JR2_Chr1g21400.1 7.31969841755572 5.375371869099151 6.48085896029261 0.563531 5.669395653035704 -0.992087575920414 Two -0.040697797609667 Core
Chr1 6772868 6774583 VDAG_JR2_Chr1g21410.1 6.325795075809539 5.37561159735459 6.436791530352781 0.589504 4.798385129525236 -0.988116357383623 Two -0.29070130960272195 Core
Chr1 6779859 6782537 VDAG_JR2_Chr1g21420.1 5.96007171695161 5.544827302900809 6.59157914551095 0.563854 6.190057117917199 -0.991315790037135 Two 1.23570657011009 Core
Chr1 6783767 6786853 VDAG_JR2_Chr1g21430.1 5.1465656047581785 4.29601177572823 6.59373622978922 0.667207 0.257327871040128 -0.989964349003751 Two -3.4272885343917103 Core
Chr1 6787238 6792606 VDAG_JR2_Chr1g21440.1 6.015109551978589 5.7287424550885415 6.4291395921177985 0.5560729999999999 2.525202922193832 -0.990759601644244 Two 2.00247119171958 Core
Chr1 6792951 6798509 VDAG_JR2_Chr1g21450.1 5.98213111808156 5.27197809086364 6.67370549880006 0.592659 3.014770975575822 -0.991558033655962 Two 1.67420802738165 Core
Chr1 6798568 6801443 VDAG_JR2_Chr1g21460.1 5.97629767815665 5.88005031822708 6.30621999910255 0.546783 4.702513747176168 -0.9918022498747092 Two 0.640523335429172 Core
Chr1 6802412 6803645 VDAG_JR2_Chr1g21470.1 7.92682799967888 6.150642664927268 6.68828321873203 0.53528 5.230119330863111 -0.9905596985348358 Two 1.10537651490407 Core
Chr1 6803559 6804671 VDAG_JR2_Chr1g21480.1 0.981678854978822 4.89216508448879 6.6506069188100385 0.623201 6.0583366424768 -0.98945008065909 Three -1.1180107402284 Core
Chr1 6804823 6807401 VDAG_JR2_Chr1g21490.1 8.00516148120378 5.8270693459164296 6.54554832428087 0.557409 5.617145331574293 -0.992606422586407 Two 3.31356950810231 Core
Chr1 6807066 6808678 VDAG_JR2_Chr1g21500.1 5.4082256488440885 5.2620274043216 6.68748393721455 0.5880890000000001 2.568664103702404 -0.9928960297614732 Two 0.3547446025603689 Core
Chr1 6808573 6809831 VDAG_JR2_Chr1g21510.1 6.49242209304794 5.2961785934593495 6.473805328064281 0.5596180000000001 4.530938217479061 -0.992716273539624 Two 1.2791096364735302 Core
Chr1 6809755 6812574 VDAG_JR2_Chr1g21520.1 6.3710812369120005 5.50194491332093 6.2053154173020815 0.589216 1.5213992908646643 -0.991435098395723 Two -0.2745559619944861 Core
Chr1 6813465 6815237 VDAG_JR2_Chr1g21530.1 4.02613989333982 5.54470694715768 6.3912438892491785 0.568284 5.443211757380533 -0.9951866362842968 Two 1.12045711464433 Core
Chr1 6815235 6817620 VDAG_JR2_Chr1g21540.1 6.883919102473191 5.594479871810808 6.4230612380619005 0.539203 6.589711806825816 -0.990582128671174 Two 0.9761328338838308 Core
Chr1 6817898 6819660 VDAG_JR2_Chr1g21550.1 6.72218551429139 6.03578774859982 6.532924405128711 0.567537 7.398790907610238 -0.9903653859116468 Two 3.13776021083969 Core
Chr1 6819600 6821632 VDAG_JR2_Chr1g21560.1 5.09055001965208 5.3813949279297315 6.44633857006984 0.591535 0.9316525597576284 -0.992562726575527 Two 0.397091273783554 Core
Chr1 6822110 6825920 VDAG_JR2_Chr1g21570.1 6.815291695222889 5.83958984517213 6.593449985673258 0.5606300000000001 0.4212169773438616 -0.990052054768961 Two -2.40138583066194 Core
Chr1 6827406 6828918 VDAG_JR2_Chr1g21580.1 5.924591870199 6.4328548465083895 6.432883458277769 0.532407 2.7303331662864228 -0.989871340295215 Two 0.41923736726907296 Core
Chr1 6829040 6830119 VDAG_JR2_Chr1g21590.1 0.739602789891275 5.685607937200401 6.48583243531713 0.57924 3.4964150795199544 -0.986935401940909 Three 0.7313914721732199 Core
Chr1 6830116 6835722 VDAG_JR2_Chr1g21600.1 6.01519204192086 5.9001874926791915 6.045442551395402 0.531038 7.161839631031388 -0.9930408511302858 Two 5.1140846159104 Core
Chr1 6836198 6840238 VDAG_JR2_Chr1g21610.1 6.0091777287963 5.5728005830529 6.22637635447856 0.544307 5.697172092830862 -0.9919678441212628 Two 5.01966336050914 Core
Chr1 6840054 6841205 VDAG_JR2_Chr1g21620.1 6.064394780065169 6.40618589295228 6.71811985589043 0.546481 9.710633832584408 -0.994901006255119 Two 4.426024035806219 Core
Chr1 6841857 6844373 VDAG_JR2_Chr1g21630.1 5.20560413307246 5.78677325407606 6.8255811480575 0.596184 5.297360512189576 -0.9918727215866808 Two 1.01868422210116 Core
Chr1 6845536 6847776 VDAG_JR2_Chr1g21640.1 5.848404384975718 5.3990190459582115 6.38206777661258 0.609375 3.82370632649363 -0.990043153359003 Two -2.71472375503883 Core
Chr1 6847713 6849016 VDAG_JR2_Chr1g21650.1 5.86101754501523 5.1463716929175405 6.61377877094063 0.611665 8.645100326175243 -0.991790630644155 Two 6.36646712930973 Core
Chr1 6849591 6850353 VDAG_JR2_Chr1g21660.1 7.83666893089446 5.19258994612338 6.599915454287619 0.515748 5.337323282641375 -0.9889055735237328 Two -2.4577689952543 Core
Chr1 6850669 6853406 VDAG_JR2_Chr1g21670.1 6.24004221118497 5.6313793346248175 6.40022845054321 0.569236 3.9043991794126818 -0.989447432753252 Two 2.03074984946038 Core
Chr1 6854063 6857366 VDAG_JR2_Chr1g21680.1 4.84174236006543 5.28019261465476 6.4526525386112095 0.58129 2.080520273878413 -0.990217293005413 Two 0.778291956933112 Core
Chr1 6857797 6859103 VDAG_JR2_Chr1g21690.1 7.77845620810492 5.74774524122626 6.193943138676113 0.56585 1.175926822605747 -0.9927525371433992 Two -1.91529872887465 Core
Chr1 6860720 6861469 VDAG_JR2_Chr1g21700.1 1.55068848160631 6.451553805962432 6.22144250827203 0.5166890000000001 6.186695920647732 -0.993771889626798 Three -2.67001673775982 Core
Chr1 6861683 6863156 VDAG_JR2_Chr1g21710.1 6.347932078833411 5.43144034041207 6.627941783314822 0.626612 5.587049761508343 -0.9926794462189692 Two 1.56352628377132 Core
Chr1 6863230 6866066 VDAG_JR2_Chr1g21720.1 7.08795098240288 5.476671163410209 6.15882691324577 0.546192 3.8113801070929982 -0.989971958877081 Two 2.50026426652865 Core
Chr1 6866944 6868907 VDAG_JR2_Chr1g21730.1 6.94289527104413 5.82770087867728 6.02378919793298 0.526235 0.0 -0.981746962546792 Two -12.069563 
Chr1 6870365 6873936 VDAG_JR2_Chr1g21740.1 6.13353770766809 5.915067585087991 6.16473226981568 0.539345 6.168205434515882 -0.9884413066341072 Two 1.64142638948591 Core
Chr1 6874225 6876394 VDAG_JR2_Chr1g21750.1 6.86550383605074 5.12323055914567 6.65690813320421 0.627939 5.373240040737522 -0.9923362633018308 Two 2.79861858061697 Core
Chr1 6876627 6878963 VDAG_JR2_Chr1g21760.1 4.3458146311571095 5.52977571713879 6.36540601022241 0.580479 6.213048869348928 -0.9901796369270078 Two -0.197695873614136 Core
Chr1 6879998 6881200 VDAG_JR2_Chr1g21770.1 4.71423145515249 3.688144205908221 6.80668417931761 0.680532 0.9980227681218538 -0.9914671048553928 Two -2.73606331321344 Core
Chr1 6881345 6884162 VDAG_JR2_Chr1g21780.1 6.6985725301631 5.79084173959298 6.49109099765138 0.589634 1.871153656466583 -0.987359965132225 Two 0.260973510437213 Core
Chr1 6886324 6887292 VDAG_JR2_Chr1g21790.1 6.02680079432451 6.4414543230561305 6.6217437606122695 0.551653 3.008356700753226 -0.9937680462884848 Two 0.101505319628793 Core
Chr1 6887759 6889424 VDAG_JR2_Chr1g21800.1 5.80482891094294 7.03677993034129 6.239124591316823 0.553153 0.08336569206662989 -0.989632508425214 One -5.4032990435568715 Core
Chr1 6888598 6889442 VDAG_JR2_Chr1g21810.1 2.8059783348766296 6.48552227602546 6.49430758629449 0.613744 0.0813111733047624 -0.986730084508188 Three -3.08216971323785 Core
Chr1 6889430 6894864 VDAG_JR2_Chr1g21820.1 6.455667310319481 5.587000009418071 6.275253432427 0.557048 3.3994701156351304 -0.991747318824974 Two 0.592909235773663 Core
Chr1 6895033 6896361 VDAG_JR2_Chr1g21830.1 4.831841128935429 5.11973497052837 6.84113196657515 0.582078 7.516732928184867 -0.994153203584628 Two 5.22152376669882 Core
Chr1 6896660 6897453 VDAG_JR2_Chr1g21840.1 7.2504689551718196 5.2470172668884505 6.93079834517617 0.62169 6.162014288643039 -0.990340599701241 Two 1.18681132333436 Core
Chr1 6897503 6899399 VDAG_JR2_Chr1g21850.1 4.41889745354076 5.2640991376353 6.6975155895951 0.6002109999999999 4.661938733439442 -0.992889306093728 Two 1.87079256888115 Core
Chr1 6900125 6902290 VDAG_JR2_Chr1g21860.1 6.92075925989404 5.585095287960429 5.94677607204857 0.568129 3.2875123461588966 -0.9921134081224308 Two 1.53384546504034 Core
Chr1 6902571 6903842 VDAG_JR2_Chr1g21870.1 0.3609526463046779 5.320737593047928 6.378018959047849 0.623131 3.819759085306482 -0.988745983783532 Three 0.338084456613271 Core
Chr1 6904013 6905080 VDAG_JR2_Chr1g21880.1 5.16503852907341 5.26777086020043 6.44991017865032 0.552952 4.9333535524547925 -0.990501973394484 Two 0.369557831140228 Core
Chr1 6907400 6908571 VDAG_JR2_Chr1g21890.1 5.672002866586452 7.52655507484355 6.4207673456929015 0.581554 0.5560076635275051 -0.990644834948297 One -3.53873518896207 Core
Chr1 6910710 6912090 VDAG_JR2_Chr1g21900.1 7.53388559510888 7.1089375498060585 6.65407482562509 0.598551 1.2282129751616822 -0.992635772603264 One -1.7324791237001598 Core
Chr1 6914640 6917579 VDAG_JR2_Chr1g21910.1 6.4459059414537 6.04751725780988 6.817616614086798 0.63525 0.30648137018912314 -0.9899827242808348 Two -3.29432852587941 Core
Chr1 6918581 6919472 VDAG_JR2_Chr1g21920.1 8.90051343743589 7.1971206115081 5.76593813339325 0.533109 0.0 -0.994545569907892 One -18.253702 
Chr1 6919932 6923388 VDAG_JR2_Chr1g21930.1 5.65080132444695 5.86951576607211 6.39766650341222 0.577546 2.69494602702368 -0.987212445873355 Two 0.6131021523995539 Core
Chr1 6926568 6928402 VDAG_JR2_Chr1g21940.1 7.59307243829875 5.88527295422956 6.2733165898462 0.549618 4.074767544168047 -0.989077113223478 Two 2.13564565725201 Core
Chr1 6930060 6930989 VDAG_JR2_Chr1g21950.1 1.11555040360101 5.6071023719356505 6.4057013539687695 0.547901 5.158812718057511 -0.991443427333506 Three 2.20668859599908 Core
Chr1 6934078 6935524 VDAG_JR2_Chr1g21960.1 2.52294141465531 5.9991894652376105 6.515892007949151 0.626556 3.662602670760552 -0.9918960885587408 Two 1.42084304130021 Core
Chr1 6936028 6936662 VDAG_JR2_Chr1g21970.1 6.85235325969417 5.797146577361961 6.28018702579526 0.550473 3.6229203011531816 -0.975505438079251 Two -1.00393202923973 Core
Chr1 6937301 6939803 VDAG_JR2_Chr1g21980.1 6.407722290295 5.59015690652159 6.9073881152834105 0.631095 1.7459623057103133 -0.9916930185588568 Two -8.949645 
Chr1 6940351 6942336 VDAG_JR2_Chr1g21990.1 0.933652193571478 5.38465684124856 6.4271839704714 0.596474 5.35441649737388 -0.994442908142776 Three 1.1416872953493702 Core
Chr1 6942584 6944366 VDAG_JR2_Chr1g22000.1 6.60750819627665 5.34885630180418 6.625146395390719 0.6711560000000001 1.3908563065565422 -0.993321989430004 Two -1.342500211931 Core
Chr1 6944506 6947507 VDAG_JR2_Chr1g22010.1 5.59802190676776 5.4548302427002096 6.39520233667258 0.603799 3.91515067145252 -0.9894632605717828 Two 1.72948432731041 Core
Chr1 6947841 6948873 VDAG_JR2_Chr1g22020.1 4.99138735904893 5.31032516720537 6.76580409849819 0.6463180000000001 4.630330121465193 -0.9880328757436 Two -2.23327404028609 Core
Chr1 6948848 6951341 VDAG_JR2_Chr1g22030.1 6.0865694838372 5.29281537451929 6.75235172212723 0.6345770000000001 0.9563338960087828 -0.992201059755281 Two -1.40515508871443 Core
Chr1 6952108 6953528 VDAG_JR2_Chr1g22040.1 5.68313774040087 5.55408890328596 6.346544393843371 0.592958 1.6991559389045456 -0.992595963916737 Two -0.9901307834857428 Core
Chr1 6953574 6955293 VDAG_JR2_Chr1g22050.1 6.73204925667366 6.741476749592872 6.159180738038889 0.544503 0.08082033705157353 -0.9906759656651728 One -5.97798727606938 Core
Chr1 6957197 6959589 VDAG_JR2_Chr1g22060.1 6.3936487147078385 5.546495341135159 6.73088072223911 0.6049329999999999 2.1915904287262133 -0.991838988072343 Two -0.568539250259688 Core
Chr1 6959834 6962714 VDAG_JR2_Chr1g22070.1 7.91061268203052 5.740017069938849 6.48502441756379 0.548611 3.040622931474291 -0.990814008430991 Two 1.7468514020654398 Core
Chr1 6963311 6964431 VDAG_JR2_Chr1g22080.1 7.07206646847636 5.74364167123942 6.89229592416844 0.599107 3.671477637672709 -0.990304432320089 Two 0.824166636357049 Core
Chr1 6965649 6967600 VDAG_JR2_Chr1g22090.1 6.24798866402364 6.06586542830036 6.34813962604339 0.558688 1.90231435807499 -0.991189236891805 Two -1.16903895965204 Core
Chr1 6967597 6968499 VDAG_JR2_Chr1g22100.1 6.79644254789355 5.14091714464728 6.94913718323772 0.660754 7.508558042687921 -0.9923511095171752 Two 4.67953036794214 Core
Chr1 6970679 6972280 VDAG_JR2_Chr1g22110.1 6.54035225890646 6.101011950819862 6.2905070168215405 0.539038 6.464781081350244 -0.991894950362945 Two 4.40584629740837 Core
Chr1 6974357 6976034 VDAG_JR2_Chr1g22120.1 7.386538489452031 7.1878519719996925 6.128167112940742 0.533095 0.12244099922597873 -0.990054296800097 One -5.42519134498726 Core
Chr1 6976083 6976307 VDAG_JR2_Chr1g22130.1 0.0 6.924237876803429 6.71790904708092 0.558036 0.2842107047208186 -0.9907147223109308 Three -6.88501115271346 Core
Chr1 6976958 6977370 VDAG_JR2_Chr1g22140.1 1.46149757250166 5.51900622727336 6.7471896419977 0.606796 4.1608460544353765 -0.9844311973915172 Three -0.3738556305532589 Core
Chr1 6977923 6981060 VDAG_JR2_Chr1g22150.1 6.72692249578074 5.68666863155331 6.42636509927618 0.592286 5.578759906186246 -0.991705707882407 Two 2.62311484556902 Core
Chr1 6981687 6983275 VDAG_JR2_Chr1g22160.1 5.97469363087102 5.33116596345204 6.227946536141549 0.56801 9.996470260129524 -0.985726930822014 Two 5.551805889321541 Core
Chr1 6990783 6993011 VDAG_JR2_Chr1g22170.1 7.06235897509017 4.3314725016338 6.79628823765581 0.5807899999999999 7.638198025629072 -0.991299680471563 Two 0.82589468944223 LS
Chr1 6993825 6997122 VDAG_JR2_Chr1g22180.1 4.650154037502389 5.662826795852388 6.511017006158121 0.570822 6.869321126385695 -0.9937064243327072 Two 3.4688720926427696 LS
Chr1 6998261 7000206 VDAG_JR2_Chr1g22190.1 7.16658572556282 5.8375653973330905 6.401199870074509 0.51054 3.397523128553241 -0.9925506114648291 Two 1.50803209748587 LS
Chr1 7000229 7002168 VDAG_JR2_Chr1g22200.1 6.81289445389218 6.21328214379438 6.40512103883093 0.518308 2.6251555786594265 -0.991661703223013 Two -1.39817211953548 Core
Chr1 7002273 7004058 VDAG_JR2_Chr1g22210.1 5.73398389885342 5.17793661392292 6.686375504632619 0.5652659999999999 5.187544686398444 -0.990960309968512 Two -0.0613240129186248 Core
Chr1 7004277 7006344 VDAG_JR2_Chr1g22220.1 5.67222249403589 5.86048408047521 6.49966882596718 0.5520079999999999 2.6476565969836625 -0.993691484823913 Two -0.291142024713586 Core
Chr1 7007082 7008619 VDAG_JR2_Chr1g22230.1 6.51576701605057 5.6909580169437 6.3581118150885 0.56799 1.8623926675246307 -0.994469398875212 Two -0.7006017682313148 Core
Chr1 7008698 7011528 VDAG_JR2_Chr1g22240.1 7.549002773518032 7.62707640443335 6.06407837590453 0.510247 0.7705985221976345 -0.9930278542625052 One -1.6942410436969702 Core
Chr1 7012360 7014771 VDAG_JR2_Chr1g22250.1 6.65972910294234 5.89380358964072 6.62656437688586 0.574036 4.4649865677147575 -0.993040531410723 Two 2.864944365427 Core
Chr1 7015596 7017206 VDAG_JR2_Chr1g22260.1 7.02529851192421 5.90133718626255 6.7270238530805 0.5819880000000001 9.62961448342076 -0.9927787727059272 Two 2.70543777356718 Core
Chr1 7017686 7021405 VDAG_JR2_Chr1g22270.1 6.06118314576488 5.72097219310837 6.33187079758011 0.55203 4.427507854497912 -0.98911600723207 Two 2.60669835875521 Core
Chr1 7021655 7023064 VDAG_JR2_Chr1g22280.1 7.3264323504629685 5.4311426348566405 6.25797174978788 0.592619 7.276784319683661 -0.994320090927645 Two 0.33001340116020195 Core
Chr1 7024975 7026555 VDAG_JR2_Chr1g22290.1 5.66822930058079 4.73628096744737 6.36468504720603 0.6594939999999999 0.12962532566317045 -0.990721308905364 Two -5.42519134498726 Core
Chr1 7026730 7029190 VDAG_JR2_Chr1g22300.1 5.872210454901071 5.41339502645526 6.78229933499089 0.592276 7.362918276049059 -0.98878492286679 Two 2.8017717883956097 Core
Chr1 7029241 7031540 VDAG_JR2_Chr1g22310.1 4.44262347868558 5.2182512310541 6.5228218732263 0.5911270000000001 6.581238479781394 -0.991055944670454 Two 5.068706835678901 Core
Chr1 7031570 7033105 VDAG_JR2_Chr1g22320.1 7.24230985210722 4.25239099826174 6.6210185458314905 0.656678 6.127413811905417 -0.99080559966538 Two 3.05345810144923 Core
Chr1 7033219 7033521 VDAG_JR2_Chr1g22330.1 1.76247361380325 5.22140429682092 7.16076559654881 0.612583 0.7291552130688042 -0.9924001841418392 Three -5.01068085298759 Core
Chr1 7033711 7034807 VDAG_JR2_Chr1g22340.1 2.7936780916587 4.59434043444558 6.36405004514526 0.580292 1.5411169228389792 -0.993939520426539 Two -1.93544477376408 Core
Chr1 7037065 7039093 VDAG_JR2_Chr1g22350.1 5.66917591659237 5.85000052016797 6.68183132862718 0.623767 4.7334696610184785 -0.9875538038699392 Two 2.01030363469216 Core
Chr1 7040205 7041792 VDAG_JR2_Chr1g22360.1 6.84627416209342 4.8935448574868605 6.734480050573598 0.625079 8.044963626390054 -0.9902253923397378 Two 6.0098634661653305 Core
Chr1 7042250 7044088 VDAG_JR2_Chr1g22370.1 3.699474582086721 5.657306899929299 6.47753365277805 0.632209 1.8754437132276045 -0.993474144325425 Two -0.5196189727359171 Core
Chr1 7045040 7056743 VDAG_JR2_Chr1g22380.1 6.707190079229231 5.39498548614796 6.642557984946519 0.625224 0.6201129837884101 -0.991654775053192 Two -11.353123 
Chr1 7062287 7065531 VDAG_JR2_Chr1g22390.1 7.07311526424119 6.364354058545178 6.728937527344849 0.568126 3.809443735880956 -0.9908227359040558 Two -0.116629315645344 Core
Chr1 7066503 7069780 VDAG_JR2_Chr1g22400.1 7.13756224705142 5.86532746110958 6.43310324576879 0.551419 4.4353266633839885 -0.991479944211273 Two 1.51814199133014 Core
Chr1 7069791 7071357 VDAG_JR2_Chr1g22410.1 6.890794418881072 5.4397778958232 6.47814947868676 0.6577270000000001 1.3226384771419886 -0.9867558882534828 Two -1.46977102612776 Core
Chr1 7075241 7076107 VDAG_JR2_Chr1g22420.1 6.22588792716925 5.53551163357329 6.20366759487234 0.6235569999999999 4.145576452298437 -0.99449142117735 Two 1.3521212403205298 Core
Chr1 7075938 7078014 VDAG_JR2_Chr1g22430.1 7.01811402874125 5.17048422791345 6.6949735788164695 0.632466 5.2606023052685424 -0.98727385435469 Two 2.74291757765743 Core
Chr1 7078065 7080070 VDAG_JR2_Chr1g22440.1 7.69331107228884 6.09737977189686 6.86417056690851 0.551621 0.7431250350485094 -0.9903957179429028 Two -2.28329719591475 Core
Chr1 7080859 7081752 VDAG_JR2_Chr1g22450.1 7.99258161896718 7.6354646073045185 6.336640504986991 0.549832 0.1516715815699257 -0.989637162782451 One -5.97798727606938 Core
Chr1 7082282 7084989 VDAG_JR2_Chr1g22460.1 6.83691765166008 7.02216480436956 6.47389800800167 0.5541189999999999 3.000469788530156 -0.989058976699885 One 1.5573678801434698 Core
Chr1 7085222 7086536 VDAG_JR2_Chr1g22470.1 7.296305914451799 7.427215671314911 6.64954549956073 0.542618 1.458137103876654 -0.9943107581577108 One -1.46584137274389 Core
Chr1 7086368 7089329 VDAG_JR2_Chr1g22480.1 7.913741542214309 7.17249519999135 6.42966981085635 0.540696 3.1349015844723307 -0.991168046853144 One -0.00438259693077713 Core
Chr1 7089269 7090721 VDAG_JR2_Chr1g22490.1 7.5950803729850485 7.479138079222517 6.553752231197269 0.563361 0.1420440799476151 -0.9854169693401 One -5.360639514209732 Core
Chr1 7092479 7093307 VDAG_JR2_Chr1g22500.1 9.27151633091255 7.7115607222642995 6.75100125042593 0.548309 0.37871852206783096 -0.9920926355025792 One -4.6630758536878805 Core
Chr1 7118474 7120128 VDAG_JR2_Chr1g22510.1 8.294781385100348 7.09581865857976 5.98666731762156 0.550786 2.96038462705698 -0.9937673377876792 One -1.006733518105 Core
Chr1 7120960 7121136 VDAG_JR2_Chr1g22520.1 8.83524697213902 7.2094725912747695 6.51492942637885 0.568182 1.92925688053105 -0.988798895279428 One -4.99348716490779 Core
Chr1 7122774 7124048 VDAG_JR2_Chr1g22530.1 8.41978964469236 6.23213161515708 6.53055592897337 0.5455260000000001 5.9701145349849805 -0.988667296255506 Two -2.05048729819487 Core
Chr1 7124540 7125156 VDAG_JR2_Chr1g22540.1 9.974058674553133 7.19969156959248 6.9536881955776915 0.517857 1.6706093766948833 -0.9904075774211758 One -4.0807079536605215 Core
Chr1 7147378 7149022 VDAG_JR2_Chr1g22550.1 9.31969436649627 7.73829729956746 5.76755240138168 0.5158149999999999 6.329411086548362 -0.990161477171058 One -0.18275615609008 Core
Chr1 7212046 7214010 VDAG_JR2_Chr1g22560.1 9.66684139651045 7.64912833310805 5.46389665983776 0.474033 6.2234339587051615 -0.993957622429992 One 6.56089 
Chr1 7227713 7229444 VDAG_JR2_Chr1g22570.1 8.64192808839913 7.14390035187596 6.21935367973011 0.518775 7.486832952092434 -0.9889659497250228 Two -0.416786223653002 Core
Chr1 7255580 7259119 VDAG_JR2_Chr1g22580.1 7.835836651549307 5.74327170506864 6.7132465826724514 0.620797 0.6071030721154457 -0.989846773268619 Two -1.7737022202709902 Core
Chr1 7259201 7261341 VDAG_JR2_Chr1g22590.1 6.0591326170608495 6.169621955991559 6.674319386081519 0.576168 3.792231069976885 -0.992220480185072 Two -0.740387057420568 Core
Chr1 7261810 7263071 VDAG_JR2_Chr1g22600.1 5.593267735488629 6.8334048871897 6.7534526542178 0.549564 3.948342863201149 -0.992188434162718 One -0.336464743777085 Core
Chr1 7265034 7267295 VDAG_JR2_Chr1g22610.1 7.6595709434920884 7.37499947473913 6.49220425826249 0.590004 0.14963002044550558 -0.9930331594081928 One -4.97757538649302 Core
Chr1 7267570 7269464 VDAG_JR2_Chr1g22620.1 7.36517155556163 7.574033460054211 6.31598785601282 0.529567 2.385671334368641 -0.984256996699776 One 0.299201938516597 Core
Chr1 7271341 7274246 VDAG_JR2_Chr1g22630.1 5.777544349172442 5.09443802936264 6.811785899509848 0.609294 5.056298913906297 -0.988820454927062 Two 3.8656632346810498 Core
Chr1 7274496 7284189 VDAG_JR2_Chr1g22640.1 5.77482209273144 4.5458168944897 6.86143201378413 0.66481 0.8097462867712445 -0.990701123758885 Two 0.17137345861407902 Core
Chr1 7284388 7285398 VDAG_JR2_Chr1g22650.1 4.74183809422857 5.25105544131697 7.043232001584362 0.578218 0.4261551593033624 -0.994312627164472 Two -4.39240856004724 Core
Chr1 7289059 7290947 VDAG_JR2_Chr1g22660.1 6.10721368671316 4.56734947645027 6.62257364110058 0.636653 2.486265605522489 -0.99017779748913 Two -0.464498268092583 Core
Chr1 7290847 7291492 VDAG_JR2_Chr1g22670.1 6.331716260951071 4.60307784695323 6.59852456795589 0.531783 2.9217708993578237 -0.993110874099698 Two -0.527212793617277 Core
Chr1 7292705 7295150 VDAG_JR2_Chr1g22680.1 5.566863825130769 5.02430435392252 7.012622594934441 0.6261760000000001 2.6600049215659536 -0.9916524272928372 Two 1.03011634941085 Core
Chr1 7295720 7298073 VDAG_JR2_Chr1g22690.1 5.84182726920418 4.72215482018644 6.7892992608198295 0.58946 6.690249126982452 -0.990834908963062 Two 3.38929565130928 Core
Chr1 7300373 7306979 VDAG_JR2_Chr1g22700.1 6.67966274505037 5.48029461217805 6.7134206376243615 0.56812 4.6498570655816085 -0.990304361494707 Two 0.8217823464701559 Core
Chr1 7307486 7312888 VDAG_JR2_Chr1g22710.1 5.91792357735827 5.886477442766321 6.483325082054289 0.558497 5.241102107013531 -0.99089350030485 Two -0.278801402806313 Core
Chr1 7313114 7314135 VDAG_JR2_Chr1g22720.1 6.382911307850231 6.124753076566369 6.51873025598959 0.548482 5.391159620111525 -0.991159929198374 Two -2.55022831045527 Core
Chr1 7315461 7317903 VDAG_JR2_Chr1g22730.1 6.112873828586791 5.51888293657498 6.13859559937392 0.5806720000000001 3.64428599642161 -0.991633640106518 Two 1.1613947837146898 Core
Chr1 7318077 7319243 VDAG_JR2_Chr1g22740.1 5.4310450963834205 6.76800370509985 6.43398080229439 0.5291600000000001 3.131497906149625 -0.990878610031452 Two -5.79013251434062 Core
Chr1 7319391 7323029 VDAG_JR2_Chr1g22750.1 6.65126253850334 7.190935275307631 6.112951078606041 0.5228149999999999 0.5918360803805218 -0.990573493287313 One -2.11736993716815 Core
Chr1 7323641 7327093 VDAG_JR2_Chr1g22760.1 6.767020096323299 5.3002104752884405 6.6383030410836685 0.5996520000000001 5.165248857990921 -0.992288333996166 Two 4.21057241903075 Core
Chr1 7327621 7329872 VDAG_JR2_Chr1g22770.1 6.78119494450435 6.20328044311697 6.68094305938099 0.594847 1.6974541807617791 -0.988389186406246 Two -0.432821073293404 Core
Chr1 7333027 7333933 VDAG_JR2_Chr1g22780.1 6.870987084506612 7.1961254368828 6.2157624206447695 0.549669 2.5189530026547504 -0.9972843379447048 One -0.559074794413847 Core
Chr1 7334929 7336400 VDAG_JR2_Chr1g22790.1 7.827939807644711 7.26930644665367 6.27620042257371 0.528212 2.2311970076651453 -0.989646761826811 One -0.096326781564167 Core
Chr1 7336265 7338214 VDAG_JR2_Chr1g22800.1 7.18033417144248 7.00491602127347 6.7999063957446095 0.554643 4.831964592173913 -0.989240653928498 One 3.0390215370001696 Core
Chr1 7340372 7345266 VDAG_JR2_Chr1g22810.1 6.5605895570349695 6.1687300320326 6.193851763195619 0.544953 7.19596436778865 -0.991109857658744 Two 1.32641410977366 Core
Chr1 7345436 7346509 VDAG_JR2_Chr1g22820.1 0.7428349106861819 6.14822767982777 6.682989432647308 0.640261 1.174771666622051 -0.992518418630548 Three -2.80152443391238 Core
Chr1 7346798 7348948 VDAG_JR2_Chr1g22830.1 6.92672700064096 7.14997991641861 6.38854054330526 0.55814 1.607118765715619 -0.9866242779981692 One -0.538140878917794 Core
Chr1 7350712 7352585 VDAG_JR2_Chr1g22840.1 7.24285219582034 7.439082327432151 6.26999100516019 0.573946 0.03723208367306457 -0.990979368021433 One -6.88501115271346 Core
Chr1 7352918 7353844 VDAG_JR2_Chr1g22850.1 5.50719689665809 6.5968448493924425 6.5002775718196295 0.61987 1.966295070241472 -0.993375108269745 Two -1.4444577642373602 Core
Chr1 7355173 7356091 VDAG_JR2_Chr1g22860.1 7.03646946372941 5.70411701229345 6.7888009010814105 0.62854 3.514791413810137 -0.989986733948316 Two -0.42928474540109096 Core
Chr1 7356318 7358347 VDAG_JR2_Chr1g22870.1 6.41327122704265 6.1972893245479295 6.2797442036519895 0.552982 7.705192849860778 -0.9940255611521508 Two 6.02580386388846 Core
Chr1 7358542 7361833 VDAG_JR2_Chr1g22880.1 6.467620491594089 5.8414971222200585 6.427304831929621 0.5591010000000001 5.587222456325433 -0.993186787616508 Two 3.62767528847472 Core
Chr1 7362555 7365152 VDAG_JR2_Chr1g22890.1 6.4700449244566 5.764738612297079 6.57926105784873 0.5710430000000001 3.756322863410368 -0.9914494042729828 Two 1.3911596617257402 Core
Chr1 7365532 7366988 VDAG_JR2_Chr1g22900.1 5.25637129354913 5.70109880975461 6.523368872436008 0.614011 5.468436622950289 -0.9906767015504432 Two -0.16144114714365804 Core
Chr1 7366667 7368060 VDAG_JR2_Chr1g22910.1 0.830361010699289 5.32205570920695 6.42326443951509 0.653984 1.8215883124335817 -0.990162473205072 Three -2.48781818815084 Core
Chr1 7368255 7370739 VDAG_JR2_Chr1g22920.1 6.845956948982531 5.734080594631847 6.314929504503733 0.559581 6.215318149951835 -0.990411728731994 Two 2.98405303787099 Core
Chr1 7372998 7373676 VDAG_JR2_Chr1g22930.1 1.64691520930507 6.38052424641974 6.94001378439906 0.572271 1.5444411480962854 -0.9906388313776808 Three -2.33638052516765 Core
Chr1 7374131 7375942 VDAG_JR2_Chr1g22940.1 4.82440177997493 5.8933002897512905 6.46078657618569 0.532303 2.6069527597558007 -0.9928825951308492 Two -0.470086380903622 Core
Chr1 7376374 7377762 VDAG_JR2_Chr1g22950.1 5.6420802327887305 5.00300395344332 6.8382350832368495 0.67219 3.718041442342271 -0.990407121829001 Two -2.05079624034249 Core
Chr1 7377863 7380676 VDAG_JR2_Chr1g22960.1 2.8149294868620096 5.24492808590079 6.554818429161401 0.574476 7.133310977680025 -0.988119895692555 Two 3.09523185287152 Core
Chr1 7380733 7382253 VDAG_JR2_Chr1g22970.1 5.911417879894628 5.1410126724199685 6.70135336094069 0.606579 7.832233216186374 -0.991458053008006 Two 5.70353842106218 Core
Chr1 7383380 7385080 VDAG_JR2_Chr1g22980.1 6.3533906501051 5.17876157925034 6.40090551846151 0.576471 3.1175573013868303 -0.986445094610882 Two 1.03856645193561 Core
Chr1 7385693 7388563 VDAG_JR2_Chr1g22990.1 6.7295573434388105 5.69440999728567 6.4844307317207885 0.580836 4.739794893068996 -0.99313199274932 Two 1.6931845497347502 Core
Chr1 7388725 7389788 VDAG_JR2_Chr1g23000.1 1.43268747790532 4.783513746442799 6.130844028951781 0.60207 2.290576706975425 -0.992420563537254 Three -4.1772550665714006 Core
Chr1 7389970 7390932 VDAG_JR2_Chr1g23010.1 7.06157267804638 5.873584643182981 6.54563133648884 0.5665279999999999 7.3196579034715095 -0.988633071706698 Two -0.320541708387294 Core
Chr1 7391565 7394659 VDAG_JR2_Chr1g23020.1 3.6238068740588703 5.559211734299929 6.439551727716651 0.573691 6.634775993590425 -0.992373564412076 Two 2.14181911278564 Core
Chr1 7395539 7399961 VDAG_JR2_Chr1g23030.1 6.2542647658725095 5.5774552948804805 6.72638368498497 0.582316 5.172454607182959 -0.991258436439641 Two 4.60621747958337 Core
Chr1 7400317 7404793 VDAG_JR2_Chr1g23040.1 6.31072352164141 5.95088019008331 6.492074192849881 0.549374 2.337442795335105 -0.991326456595018 Two 1.5029011365721 Core
Chr1 7406996 7410569 VDAG_JR2_Chr1g23050.1 6.053686143176511 6.21006490888983 6.7817272740498495 0.540722 0.8005161874604034 -0.9917375029150568 Two -1.15416500808585 Core
Chr1 7410381 7411196 VDAG_JR2_Chr1g23060.1 8.18235849295166 5.0398568800981 6.736611129775209 0.588957 0.24475252020421776 -0.992025899966384 Two -4.994903167154339 Core
Chr1 7413658 7414080 VDAG_JR2_Chr1g23070.1 6.777893348153159 6.16291865704939 6.65616541338211 0.635071 0.0 -0.987378765041754 Two -12.269364 
Chr1 7414840 7418107 VDAG_JR2_Chr1g23080.1 4.70624997326592 5.0451192706081125 6.6017526322007 0.6072850000000001 5.074103214488625 -0.9915119059517492 Two -0.842429690822615 Core
Chr1 7420244 7422654 VDAG_JR2_Chr1g23090.1 5.71213397814496 4.8586931012891 6.6258218466919185 0.63527 2.2044371893308736 -0.99258416248897 Two -0.537427934727106 Core
Chr1 7424069 7427345 VDAG_JR2_Chr1g23100.1 5.26260204577358 5.4112944820664 6.610541254839902 0.591575 3.1550134367277822 -0.989347371012687 Two 2.02465883394227 Core
Chr1 7427452 7430125 VDAG_JR2_Chr1g23110.1 5.6301244827875685 4.791125257019889 6.31764251316742 0.642349 1.5671919349506669 -0.9928040998188492 Two -2.26315967865206 Core
Chr1 7430383 7431869 VDAG_JR2_Chr1g23120.1 6.88205863030162 4.60763363315256 6.674702505915071 0.652759 4.667859242722465 -0.9896651115743492 Two 2.77154395464719 Core
Chr1 7431753 7436424 VDAG_JR2_Chr1g23130.1 5.911077515141081 5.3374226024465985 6.2201761807702605 0.548491 2.7460499509414653 -0.9935852224428608 Two 2.1160640353471 Core
Chr1 7437668 7439392 VDAG_JR2_Chr1g23140.1 6.850866665107452 5.494814662279731 6.80405360788708 0.613109 7.292650291812063 -0.9837432113060022 Two 4.550673371048839 Core
Chr1 7439128 7440933 VDAG_JR2_Chr1g23150.1 7.2358152868008485 5.61020662457564 6.67649629857571 0.58338 5.441496192144525 -0.9929749106652472 Two 1.28183595190777 Core
Chr1 7441875 7448543 VDAG_JR2_Chr1g23160.1 6.77095206983235 5.83295154343118 6.435892558573482 0.545141 2.9570426427691565 -0.9910408534767472 Two 1.87142144354428 Core
Chr1 7448923 7450247 VDAG_JR2_Chr1g23170.1 6.294656219867082 5.44992933256812 6.80950944207813 0.567221 1.2607090775078469 -0.99060130199775 Two -1.90047204608591 Core
Chr1 7451176 7454303 VDAG_JR2_Chr1g23180.1 7.16806681263762 6.30756763431455 6.6323814252168205 0.5580430000000001 0.8316355737081857 -0.9895384535810942 Two -1.40508748949015 Core
Chr1 7455222 7457808 VDAG_JR2_Chr1g23190.1 6.71740136995632 6.02198857132748 6.334266426549831 0.5290020000000001 4.557849431900428 -0.989266781073555 Two 2.2202747817047404 Core
Chr1 7458002 7461267 VDAG_JR2_Chr1g23200.1 6.14849607545933 5.9943922435754695 6.56687330381603 0.541194 6.7294750892934525 -0.987414793138918 Two 1.49148036560401 Core
Chr1 7462678 7464447 VDAG_JR2_Chr1g23210.1 6.03434450066171 5.745545782949248 6.468110964971019 0.552289 5.327506450324019 -0.991905561106412 Two 3.4245081771115804 Core
Chr1 7464633 7468655 VDAG_JR2_Chr1g23220.1 6.35650152612944 5.995382125722911 6.50532464144544 0.571358 4.478652595229517 -0.9915332977699708 Two 3.7298532959337902 Core
Chr1 7469172 7470275 VDAG_JR2_Chr1g23230.1 7.42894724926569 6.32339506377169 6.638546065683969 0.580236 1.2636105692787898 -0.994149251700588 Two -2.16088430303671 Core
Chr1 7471211 7475478 VDAG_JR2_Chr1g23240.1 6.769917817224012 6.83008355300035 6.8198749835822 0.588001 0.6849995591019975 -0.990648516660448 One -1.23298258632894 Core
Chr1 7475761 7478012 VDAG_JR2_Chr1g23250.1 5.33361565526151 7.85027929601653 6.45412033728551 0.53976 0.06213220795443632 -0.9897277124929827 One -5.97798727606938 Core
Chr1 7479485 7480750 VDAG_JR2_Chr1g23260.1 7.45545080736371 8.07054861863198 6.37268434420562 0.558103 0.056588300945060135 -0.992758751532418 One -6.88501115271346 Core
Chr1 7483257 7485427 VDAG_JR2_Chr1g23270.1 6.844086166393289 7.47960656618272 6.97254667005661 0.58341 1.1477675118239343 -0.988569892544522 One -1.28989747419246 LS
Chr1 7486249 7487452 VDAG_JR2_Chr1g23280.1 6.008366547339232 6.19378100546308 7.015615626779809 0.591854 3.4971062898080074 -0.983703603670588 Two 0.9635995194571452 LS
Chr1 7487710 7489384 VDAG_JR2_Chr1g23290.1 7.52210505106399 8.57830970150885 6.36645961111822 0.521505 1.0693264734259982 -0.9880788851810872 One -3.51462973322894 LS
Chr1 7489643 7491029 VDAG_JR2_Chr1g23300.1 5.22867029354487 8.20697936323081 6.43575648024023 0.531025 4.6211735328560035 -0.9914109064801948 One 2.35945470476129 LS
Chr1 7491176 7493695 VDAG_JR2_Chr1g23310.1 7.9178299196511785 8.585719896646381 6.30061289496542 0.515284 2.5893508666876404 -0.992557509077414 One 1.29543220646577 LS
Chr1 7493223 7494970 VDAG_JR2_Chr1g23320.1 7.26527585940722 8.67036364064973 6.19264082140151 0.530624 2.4557517682522843 -0.991654910553674 One 0.683986659685346 LS
Chr1 7495364 7496784 VDAG_JR2_Chr1g23330.1 6.23453815558802 7.936995561119501 6.4261466587615095 0.535211 2.647754955980718 -0.987484428252325 One 0.241768477172796 LS
Chr1 7497863 7499739 VDAG_JR2_Chr1g23340.1 7.4200079771933405 8.57606080214969 6.24889680802737 0.5106609999999999 0.0 -0.9896606115755908 One -18.909819 
Chr1 7501767 7502840 VDAG_JR2_Chr1g23350.1 7.207643922958258 8.427088211628 6.1068225403952505 0.499534 3.7837278634206326 -0.98815636208686 One 1.11075288878647 LS
Chr1 7503253 7504444 VDAG_JR2_Chr1g23360.1 7.669948850625841 8.40889069491189 6.095652134315669 0.517212 1.3247351398254188 -0.992235207085628 One -1.76994411555305 LS
Chr1 7505122 7506902 VDAG_JR2_Chr1g23370.1 7.46418878592299 7.65622315190767 6.57570950631693 0.569663 1.6567773082242072 -0.992167523896719 One -0.716898957416359 LS
Chr1 7506664 7507922 VDAG_JR2_Chr1g23380.1 6.84217022631137 8.098250582963509 6.66397510178845 0.54372 1.5391254322757042 -0.9923495494669352 One -1.40171394534785 LS
Chr1 7515607 7517025 VDAG_JR2_Chr1g23390.1 8.38602714145198 6.957549434846151 6.29245729141566 0.5218619999999999 8.169106068775804 -0.9947736990598322 Two -2.05325696637844 Core
Chr1 7526998 7530055 VDAG_JR2_Chr1g23400.1 7.66861742831491 6.4423310794891115 6.422568428078929 0.568531 3.4994968531934054 -0.98675935238554 One 0.456522785187947 Core
Chr1 7530488 7532541 VDAG_JR2_Chr1g23410.1 5.671909303482139 7.64857394186211 6.209602982627209 0.528982 2.755242919874277 -0.991653663359673 One 0.885288016663581 Core
Chr1 7534310 7535863 VDAG_JR2_Chr1g23420.1 7.323148489168267 8.0768837380652 6.19549014316687 0.537669 0.6905738246678069 -0.992142639961767 One -10.564424808137801 Core
Chr1 7535910 7539327 VDAG_JR2_Chr1g23430.1 5.0228278954106385 7.427870345103838 6.00326016391741 0.518584 3.563375128106545 -0.985452669419223 One 2.55864391531591 Core
Chr1 7539573 7541363 VDAG_JR2_Chr1g23440.1 6.23807440849359 5.0919596862848095 6.7173968273771 0.635754 5.9244323952362405 -0.992506242028834 Two 2.24517763792889 Core
Chr1 7541242 7543459 VDAG_JR2_Chr1g23450.1 6.8688104466317 5.78757936997004 6.1923728935119415 0.56608 3.344631408297125 -0.9919096913611072 Two 0.7649501936456591 Core
Chr1 7544059 7547153 VDAG_JR2_Chr1g23460.1 6.7853467210272695 5.9505676834382 6.188374697037821 0.55947 2.9849147345420337 -0.99331925823568 Two -0.6965866933901569 Core
Chr1 7549284 7552546 VDAG_JR2_Chr1g23470.1 6.720420072094059 5.47236722965867 6.27763548525939 0.608829 3.000308909978896 -0.990256213069285 Two -2.4999176122195 Core
Chr1 7552639 7553880 VDAG_JR2_Chr1g23480.1 6.227875976345088 5.547396982006309 6.82851170709291 0.614021 7.589623824259479 -0.990185710173044 Two 2.7972581703112502 Core
Chr1 7554189 7555913 VDAG_JR2_Chr1g23490.1 7.12660519609328 6.12406120464213 6.49058791757985 0.63051 2.498277971860613 -0.993257161772764 Two 0.34108322162597604 Core
Chr1 7556012 7558202 VDAG_JR2_Chr1g23500.1 6.23662915705479 5.406154192100309 6.39281713674814 0.612785 3.3938437430876123 -0.987165140844659 Two -0.738497513369647 Core
[truncated: 1,536,394 more chars]
