# Supplementary material for: A unique chromatin profile defines adaptive genomic regions in a fungal plant pathogen
Source: eLife journal article supplement (doi:10.7554/elife.62208), 2020-12-18
Supplement: supp [file elife-62208-supp-v1.zip › elife_poa_e62208_Supplementary_file_1.xlsx]

## Sheet: table1_TEsummary
table 1. Summary of Transposable elements by Family in core and LS regions
Family	Class	Core	LS	Count (>100bp)
DNA	I	171 (0.91)	17 (0.09)	188 (0.08)
LINE	II	27 (0.50)	27 (0.50)	54 (0.03)
LTR	II	874 (0.93)	62 (0.07)	936 (0.42)
Unspecified	II	947 (0.90)	102 (0.10)	1049 (0.47)
Total		2019	208	2227
The fraction of the family total between core and LS are shown in parentheses, while the parenthese in the final column denote fraction of the total genome count

## Sheet: table2_DunnTest_p-value
table 2. Dunns test of pairwise differences for TE Families following Kruskal-Wallis test.
Comparison	mCG	mCHG	Juke_Gap	Length	Identity	GC%	CRI	RNAseq-PDB	RNAseq-HMS	RNAseq- X	TPM H3K9me3	TPM H3K27me3	TPM ATAC-seq
DNA - LINE	0.969848	0.820228	0.0775603	0.000281222	0.191088	5.49201e-06	0.0113926	1.56853e-05	7.80164e-05	2.42428e-06	0.368469	0.163327	0.49037
DNA - LTR	2.60858e-17	0.101854	0.00215866	4.64878e-20	0.0024621	5.18139e-23	1.8515e-28	4.27391e-19	1.05249e-24	1.04648e-18	1.75835e-45	0.918393	1.73679e-32
LINE - LTR	1.8307e-06	0.193528	0.000342605	0.236351	0.00125989	2.05145e-26	1.0589e-19	1.79795e-22	1.79174e-24	3.69066e-24	1.51524e-19	0.132921	6.3723e-14
DNA - Unsp	4.54184e-06	0.686648	0.000395962	0.0394349	0.395048	0.410803	8.948e-10	2.73352e-06	9.68708e-10	2.69434e-07	6.12744e-08	3.9565e-12	0.0132432
LINE - Unsp	0.0109259	0.976371	0.94597	1.8188e-07	0.274297	4.58966e-08	4.64869e-10	1.28358e-13	7.82304e-15	6.98724e-16	4.76075e-05	0.0349793	0.0293871
LTR - Unsp	2.00405e-12	2.296e-06	1.46493e-33	1.40023e-90	2.64758e-12	1.77664e-58	1.67118e-19	1.68807e-14	1.70015e-14	1.65732e-11	2.68526e-54	4.90072e-36	1.95169e-61
Each cell lists the p-value for the contrast listed under comparison and the genomic variable listed as columns. The Benjamini-Hochberg (HB) multiple testing correct method was used to decrease the false discovery rate.

## Sheet: table3_TEsubclass
table 3. Summary count of TEs by sub-class.
TE Class	Class Count	TE sub-class	Sub-class Count
Unspecified	1043	Unspecified	1049
DNA	188	Mite	111
		Tc1-Mariner	54
		hAT	15
		Mutator	8
LINE	54	I	52
		R2	2
LTR	936	Gypsy	531
		Copia	405

## Sheet: table4_Tesubclass_KW
table 4. Kruskal-wallis test statistic for differences between TE sub-classes for genomic variables
Genomic Variable	Kruskal-Wallis H statistic	p-value
Juke Cantor	250.51	1.34e-49
GC %	382.41	1.08e-77
CRI	259.41	1.74e-51
RNAseq-PDB	208.73	9.24e-41
RNAseq-HMS	255.54	1.15e-50
RNAseq-X	227.39	1.05e-44
H3K9me3	418.83	1.75e-85
H3K27me3	257.73	3.94e-51
ATAC	365.03	5.58e-74
5mCG	124.04	4.86e-23

## Sheet: table5_Tesubclass_Conover
table 5. P-value results from Conover test and BH multiple testing correction for genomic variables summarized over TE sub-classes
Jukes Cantor
	DNA/Mite	DNA/Mutator	DNA/Tc1-Mariner	DNA/hAT	LINE/I	LINE/R2	LTR/Copia	LTR/Gypsy	Unspecified
DNA/Mite		0.206199	8.13208e-14	0.640047	1	0.430679	2.42949e-13	1.58707e-05	1
DNA/Mutator	0.206199		1	0.0374766	0.277271	1	1	1	0.247624
DNA/Tc1-Mariner	8.13208e-14	1		3.74503e-08	8.11883e-10	1	0.00838053	2.30421e-07	1.74059e-17
DNA/hAT	0.640047	0.037477	3.74503e-08		0.640047	0.168657	1.60144e-05	0.00348298	0.401311
LINE/I	1	0.277271	8.11883e-10	0.640047		0.458269	7.63502e-07	0.00994531	1
LINE/R2	0.430679	1	1	0.168656	0.458269		1	1	0.458269
LTR/Copia	2.42949e-13	1	0.00838053	1.60144e-05	7.63502e-07	1		9.94359e-06	9.27724e-37
LTR/Gypsy	1.58707e-05	1	2.30421e-07	0.00348298	0.00994531	1	9.94359e-06		2.51356e-15
Unspecified	1	0.247624	1.74059e-17	0.401311	1	0.458269	9.27724e-37	2.51356e-15
% GC
	DNA/Mite	DNA/Mutator	DNA/Tc1-Mariner	DNA/hAT	LINE/I	LINE/R2	LTR/Copia	LTR/Gypsy	Unspecified
DNA/Mite		0.21215	3.66861e-06	1	1.47862e-09	1	6.58848e-08	4.53968e-07	0.366557
DNA/Mutator	0.21215		1	0.255386	1	0.679528	0.00047996	0.000806329	0.490985
DNA/Tc1-Mariner	3.66861e-06	1		0.007826	1	0.490985	9.04225e-23	6.74727e-22	2.87826e-05
DNA/hAT	1	0.255386	0.00782648		0.000366282	1	0.366557	0.495735	1
LINE/I	1.47862e-09	1	1	0.000366		0.269464	2.15726e-29	1.50527e-28	4.01956e-09
LINE/R2	1	0.679528	0.490985	1	0.269464		1	1	1
LTR/Copia	6.58848e-08	0.00048	9.04225e-23	0.366557	2.15726e-29	1		1	1.27762e-41
LTR/Gypsy	4.53968e-07	0.000806	6.74727e-22	0.495735	1.50527e-28	1	1		1.19625e-43
Unspecified	0.366557	0.490985	2.87826e-05	1	4.01956e-09	1	1.27762e-41	1.19625e-43
CRI
	DNA/Mite	DNA/Mutator	DNA/Tc1-Mariner	DNA/hAT	LINE/I	LINE/R2	LTR/Copia	LTR/Gypsy	Unspecified
DNA/Mite		0.087138	1.79309e-06	1	1.8663e-05	0.097195	1.52468e-06	2.32125e-10	0.177015
DNA/Mutator	0.087138		1	0.444939	1	0.007693	0.000376612	6.70452e-05	0.0123637
DNA/Tc1-Mariner	1.79309e-06	1		0.087138	1	0.003025	2.05505e-21	7.59191e-26	1.71773e-13
DNA/hAT	1	0.444939	0.0871385		0.15292	0.087138	0.0426497	0.00792714	0.719592
LINE/I	1.8663e-05	1	1	0.15292		0.004084	5.4199e-19	3.2787e-23	1.44962e-11
LINE/R2	0.0971955	0.007693	0.00302481	0.087138	0.00408447		0.517235	0.719592	0.182472
LTR/Copia	1.52468e-06	0.000377	2.05505e-21	0.04265	5.4199e-19	0.517235		0.193405	2.31315e-08
LTR/Gypsy	2.32125e-10	6.7e-05	7.59191e-26	0.007927	3.2787e-23	0.719592	0.193405		1.12764e-18
Unspecified	0.177015	0.012364	1.71773e-13	0.719592	1.44962e-11	0.182472	2.31315e-08	1.12764e-18
RNAseq-PDB
	DNA/Mite	DNA/Mutator	DNA/Tc1-Mariner	DNA/hAT	LINE/I	LINE/R2	LTR/Copia	LTR/Gypsy	Unspecified
DNA/Mite		1	1	0.651236	3.42926e-05	0.63419	1.49144e-06	1.02043e-14	0.00179728
DNA/Mutator	1		1	0.475822	1	0.392456	0.0778627	0.00714955	0.316775
DNA/Tc1-Mariner	1	1		0.316775	0.00889179	0.448094	7.50519e-06	4.04537e-11	0.00162155
DNA/hAT	0.651236	0.475822	0.316775		0.000357933	1	1	0.646878	1
LINE/I	3.42926e-05	1	0.00889179	0.000358		0.055853	1.34731e-18	3.62187e-27	7.13922e-15
LINE/R2	0.634189	0.392456	0.448094	1	0.0558534		1	1	1
LTR/Copia	1.49144e-06	0.077863	7.50519e-06	1	1.34731e-18	1		0.000357933	0.0063549
LTR/Gypsy	1.02043e-14	0.00715	4.04537e-11	0.646878	3.62187e-27	1	0.000357933		2.39486e-17
Unspecified	0.00179728	0.316775	0.00162155	1	7.13922e-15	1	0.0063549	2.39486e-17
RNAseq-HMS
	DNA/Mite	DNA/Mutator	DNA/Tc1-Mariner	DNA/hAT	LINE/I	LINE/R2	LTR/Copia	LTR/Gypsy	Unspecified
DNA/Mite		0.359669	1	0.025304	0.000913502	0.266296	7.18867e-11	4.08332e-24	5.37605e-08
DNA/Mutator	0.359669		0.222979	0.005434	1	0.053083	0.000712158	7.32833e-06	0.00303144
DNA/Tc1-Mariner	1	0.222979		0.109938	0.000778561	0.370022	0.000145773	7.18867e-11	0.00500558
DNA/hAT	0.0253041	0.005434	0.109938		7.71233e-06	1	1	1	1
LINE/I	0.000913502	1	0.000778561	8e-06		0.027718	1.08958e-19	5.08624e-31	6.44468e-17
LINE/R2	0.266296	0.053083	0.370022	1	0.0277176		1	1	1
LTR/Copia	7.18867e-11	0.000712	0.000145773	1	1.08958e-19	1		6.44369e-07	0.0565176
LTR/Gypsy	4.08332e-24	7e-06	7.18867e-11	1	5.08624e-31	1	6.44369e-07		2.87878e-20
Unspecified	5.37605e-08	0.003031	0.00500558	1	6.44468e-17	1	0.0565176	2.87878e-20
RNAseq-X
	DNA/Mite	DNA/Mutator	DNA/Tc1-Mariner	DNA/hAT	LINE/I	LINE/R2	LTR/Copia	LTR/Gypsy	Unspecified
DNA/Mite		0.144765	1	0.099636	8.1753e-06	0.411245	5.20963e-06	5.83385e-17	0.000102734
DNA/Mutator	0.144765		0.233637	0.004764	1	0.0542	0.00104439	1.13423e-05	0.00284142
DNA/Tc1-Mariner	1	0.233637		0.097004	0.000468495	0.381892	0.000431734	3.38565e-10	0.00351645
DNA/hAT	0.0996364	0.004764	0.0970044		4.65374e-06	1	1	1	1
LINE/I	8.1753e-06	1	0.000468495	5e-06		0.024638	5.47849e-19	8.46438e-31	1.13203e-17
LINE/R2	0.411245	0.0542	0.381891	1	0.0246384		1	1	1
LTR/Copia	5.20963e-06	0.001044	0.000431734	1	5.47849e-19	1		4.07604e-07	0.429254
LTR/Gypsy	5.83385e-17	1.1e-05	3.38565e-10	1	8.46438e-31	1	4.07604e-07		3.26922e-17
Unspecified	0.000102734	0.002841	0.00351645	1	1.13203e-17	1	0.429254	3.26922e-17
H3K9me3 (Log2 TPM +1)
	DNA/Mite	DNA/Mutator	DNA/Tc1-Mariner	DNA/hAT	LINE/I	LINE/R2	LTR/Copia	LTR/Gypsy	Unspecified
DNA/Mite		1	0.040623	1	1	0.135462	7.33108e-28	7.90516e-48	1.40729e-09
DNA/Mutator	1		1	1	1	0.387305	0.028763	0.000761597	1
DNA/Tc1-Mariner	0.040623	1		1	0.0579674	0.602565	3.22629e-06	2.22299e-13	1
DNA/hAT	1	1	1		1	0.416126	0.00320331	8.1158e-06	0.91559
LINE/I	1	1	0.0579674	1		0.123889	1.52641e-16	3.18263e-27	8.46672e-06
LINE/R2	0.135462	0.387305	0.602565	0.416126	0.123889		1	1	0.904847
LTR/Copia	7.33108e-28	0.028763	3.22629e-06	0.003203	1.52641e-16	1		1.03087e-06	9.16029e-21
LTR/Gypsy	7.90516e-48	0.000762	2.22299e-13	8e-06	3.18263e-27	1	1.03087e-06		3.57158e-62
Unspecified	1.40729e-09	1	1	0.91559	8.46672e-06	0.904847	9.16029e-21	3.57158e-62
H3K27me3 (Log2 TPM +1)
	DNA/Mite	DNA/Mutator	DNA/Tc1-Mariner	DNA/hAT	LINE/I	LINE/R2	LTR/Copia	LTR/Gypsy	Unspecified
DNA/Mite		1	1	9.04049e-07	0.316548	0.038748	0.00192756	1	3.46899e-12
DNA/Mutator	1		1	0.0645833	1	0.209755	1	1	1
DNA/Tc1-Mariner	1	1		9.52353e-06	0.886434	0.049113	0.106524	1	9.20698e-06
DNA/hAT	9.04049e-07	0.064583	1e-05		0.000773	1	0.000406271	7.22999e-08	0.0363323
LINE/I	0.316548	1	0.886434	0.0007728		0.122894	1	0.0645833	0.0322073
LINE/R2	0.0387484	0.209755	0.049113	1	0.122894		0.140825	0.0322073	0.40895
LTR/Copia	0.00192756	1	0.106524	0.000406271	1	0.140825		1.08284e-10	8.70762e-08
LTR/Gypsy	1	1	1	7.22999e-08	0.064583	0.032207	1.08284e-10		3.8976e-48
Unspecified	3.46899e-12	1	9e-06	0.0363323	0.032207	0.40895	8.70762e-08	3.8976e-48
ATAC (Log2 TPM +1)
	DNA/Mite	DNA/Mutator	DNA/Tc1-Mariner	DNA/hAT	LINE/I	LINE/R2	LTR/Copia	LTR/Gypsy	Unspecified
DNA/Mite		1	0.0508947	0.094509	1	1	9.55309e-26	1.37421e-32	0.000297634
DNA/Mutator	1		1	0.843663	1	1	0.0176569	0.00554608	1
DNA/Tc1-Mariner	0.0508947	1		1	0.249151	1	2.83455e-05	2.38924e-07	1
DNA/hAT	0.0945094	0.843663	1		0.216863	1	0.66324	0.249151	1
LINE/I	1	1	0.249151	0.216863		1	6.99241e-13	4.74969e-16	0.0843278
LINE/R2	1	1	1	1	1		1	1	1
LTR/Copia	9.55309e-26	0.017657	2.83455e-05	0.66324	6.99241e-13	1		0.573948	4.56404e-34
LTR/Gypsy	1.37421e-32	0.005546	2.38924e-07	0.249151	4.74969e-16	1	0.573948		4.41975e-54
Unspecified	0.000297634	1	1	1	0.0843278	1	4.56404e-34	4.41975e-54
5mC (Log2 weighted +0.01 )
	DNA/Mite	DNA/Mutator	DNA/Tc1-Mariner	DNA/hAT	LINE/I	LINE/R2	LTR/Copia	LTR/Gypsy	Unspecified
DNA/Mite		0.984844	0.437468	1	1	0.181967	1.27965e-06	1.58913e-08	0.0372309
DNA/Mutator	0.984844		1	0.410236	1	0.066599	0.0314334	0.0182598	0.214159
DNA/Tc1-Mariner	0.437468	1		0.214159	1	0.066599	3.14437e-08	1.24061e-09	0.00028151
DNA/hAT	1	0.410236	0.214159		0.635284	0.527887	1	1	1
LINE/I	1	1	1	0.635284		0.120191	1.57437e-05	1.16213e-06	0.0294095
LINE/R2	0.181967	0.066599	0.0665994	0.527887	0.120191		0.795071	0.929769	0.410236
LTR/Copia	1.27965e-06	0.031433	3.14437e-08	1	1.6e-05	0.795071		1	1.53033e-05
LTR/Gypsy	1.58913e-08	0.01826	1.24061e-09	1	1e-06	0.929769	1		1.24061e-09
Unspecified	0.0372309	0.214159	0.00028151	1	0.029409	0.410236	1.53033e-05	1.24061e-09
Pairwise tests for significant differences are shown, with the TE sub-classes named by rows and columns. Each table of p-values indicate the genomic varaible being tested at the top left.

## Sheet: table6_VarContribPCA
table 6. Contribution of variables to the first 5 dimensions of PCA
	Dimension1	Dimension2	Dimension3	Dimension4	Dimension5
TPM H3K9me3-ChIP	18.8707	1.07301	7.52132	9.30254	2.67295
TPM H3K27me3-ChIP	8.06091	7.34127	74.4612	0.605691	7.08131
TPM ATAC-seq	19.3523	0.958318	0.926794	7.72929	7.40355
TPM RNA-seq PDB	0.686074	89.2488	9.9147	0.0105827	0.00440921
mCG	14.2161	0.865486	4.48308	79.0075	0.991416
TE Density	16.5117	0.00181283	2.0974	0.189969	80.198
GC sequence %	22.3023	0.511271	0.595542	3.15443	1.64837

## Sheet: table7_CM_GMB
table 7. Confusion Matrix results for Stochastic Gradient Boosting Machine Learning of 15 independent training-test predictions of LS and core regions
Model1	Reference
Prediction	Core	LS
Core	642	8
LS	46	25
Model2	Reference
Prediction	Core	LS
Core	650	6
LS	38	27
Model3	Reference
Prediction	Core	LS
Core	659	11
LS	29	22
Model4	Reference
Prediction	Core	LS
Core	648	9
LS	40	24
Model5	Reference
Prediction	Core	LS
Core	660	8
LS	28	25
Model6	Reference
Prediction	Core	LS
Core	665	12
LS	23	21
Model7	Reference
Prediction	Core	LS
Core	651	8
LS	37	25
Model8	Reference
Prediction	Core	LS
Core	651	6
LS	37	27
Model9	Reference
Prediction	Core	LS
Core	651	9
LS	37	24
Model10	Reference
Prediction	Core	LS
Core	653	8
LS	35	25
Model11	Reference
Prediction	Core	LS
Core	652	10
LS	36	23
Model12	Reference
Prediction	Core	LS
Core	654	10
LS	34	23
Model13	Reference
Prediction	Core	LS
Core	657	8
LS	31	25
Model14	Reference
Prediction	Core	LS
Core	655	9
LS	33	24
Model15	Reference
Prediction	Core	LS
Core	653	7
LS	35	26

## Sheet: table8_CM_RF
table 8. Confusion Matrix results for Random Forest Machine Learning of 15 independent training-test predictions of LS and core regions
Model1	Reference
Prediction	Core	LS
Core	626	5
LS	62	28
Model2	Reference
Prediction	Core	LS
Core	629	4
LS	59	29
Model3	Reference
Prediction	Core	LS
Core	646	8
LS	42	25
Model4	Reference
Prediction	Core	LS
Core	627	5
LS	61	28
Model5	Reference
Prediction	Core	LS
Core	638	3
LS	50	30
Model6	Reference
Prediction	Core	LS
Core	648	7
LS	40	26
Model7	Reference
Prediction	Core	LS
Core	628	4
LS	60	29
Model8	Reference
Prediction	Core	LS
Core	629	4
LS	59	29
Model9	Reference
Prediction	Core	LS
Core	623	7
LS	65	26
Model10	Reference
Prediction	Core	LS
Core	635	8
LS	53	25
Model11	Reference
Prediction	Core	LS
Core	632	7
LS	56	26
Model12	Reference
Prediction	Core	LS
Core	633	5
LS	55	28
Model13	Reference
Prediction	Core	LS
Core	641	3
LS	47	30
Model14	Reference
Prediction	Core	LS
Core	631	6
LS	57	27
Model15	Reference
Prediction	Core	LS
Core	640	5
LS	48	28

## Sheet: table9_GBM_LSregions
table 9. GMB LS prediction results for each of the 15 rounds of training and testing
Index	Chr	start	end	Original Classification	pred1	pred2	pred3	pred4	pred5	pred6	pred7	pred8	pred9	pred10	pred11	pred12	pred13	pred14	pred15	Core Count	LS Count	Final Pred
165	Chr1	1690000	1700000	Core	missed	LS	missed	missed	missed	LS	missed	missed	missed	LS	LS	Core	missed	missed	missed	1	4	LS
207	Chr1	2110000	2120000	Core	missed	missed	missed	LS	missed	missed	missed	missed	missed	missed	missed	missed	missed	missed	missed	0	1	LS
368	Chr1	3720000	3730000	Core	missed	missed	missed	missed	missed	missed	missed	missed	missed	missed	missed	missed	missed	LS	missed	0	1	LS
506	Chr1	5100000	5110000	Core	LS	missed	missed	missed	missed	missed	LS	missed	missed	missed	missed	LS	missed	missed	missed	0	3	LS
695	Chr1	6990000	7000000	Core	missed	missed	missed	missed	LS	missed	missed	missed	missed	missed	LS	LS	missed	missed	missed	0	3	LS
744	Chr1	7480000	7490000	Core	LS	LS	missed	LS	missed	missed	missed	missed	missed	missed	missed	missed	missed	missed	missed	0	3	LS
745	Chr1	7490000	7500000	Core	missed	missed	LS	missed	missed	LS	missed	missed	missed	missed	missed	missed	missed	missed	missed	0	2	LS
746	Chr1	7500000	7510000	Core	LS	LS	missed	missed	missed	LS	missed	LS	missed	missed	missed	missed	missed	missed	missed	0	4	LS
761	Chr1	7650000	7660000	Core	missed	missed	missed	missed	missed	missed	LS	LS	missed	missed	missed	missed	missed	missed	missed	0	2	LS
767	Chr1	7710000	7720000	Core	missed	missed	missed	missed	missed	missed	LS	missed	missed	missed	missed	missed	missed	missed	missed	0	1	LS
864	Chr1	8680000	8690000	Core	missed	missed	LS	missed	missed	missed	missed	missed	missed	missed	LS	missed	LS	missed	LS	0	4	LS
866	Chr1	8700000	8710000	Core	missed	LS	LS	missed	missed	missed	LS	missed	LS	missed	missed	missed	missed	missed	missed	0	4	LS
870	Chr1	8740000	8750000	Core	missed	missed	missed	missed	missed	missed	missed	missed	missed	missed	missed	LS	missed	missed	missed	0	1	LS
895	Chr1	8990000	9000000	Core	LS	LS	missed	missed	LS	missed	missed	missed	missed	LS	missed	LS	missed	LS	missed	0	6	LS
898	Chr1	9020000	9030000	Core	missed	missed	missed	missed	missed	missed	missed	LS	missed	missed	missed	LS	missed	missed	LS	0	3	LS
921	Chr1	9250000	9260000	Core	missed	missed	missed	missed	missed	LS	missed	missed	missed	missed	missed	missed	missed	missed	LS	0	2	LS
922	Chr1	9260000	9270000	Core	LS	missed	missed	LS	missed	missed	missed	missed	LS	missed	missed	missed	LS	missed	LS	0	5	LS
924	Chr2	0	10000	Core	missed	missed	missed	missed	missed	missed	missed	missed	LS	LS	LS	missed	missed	missed	missed	0	3	LS
935	Chr2	110000	120000	Core	LS	missed	missed	missed	missed	missed	missed	missed	missed	missed	missed	LS	missed	missed	LS	0	3	LS
936	Chr2	120000	130000	Core	missed	missed	missed	missed	missed	missed	missed	LS	missed	missed	missed	missed	missed	LS	missed	0	2	LS
938	Chr2	140000	150000	Core	missed	missed	missed	missed	missed	missed	missed	missed	missed	LS	missed	LS	missed	missed	missed	0	2	LS
943	Chr2	190000	200000	Core	missed	missed	missed	LS	missed	missed	LS	missed	missed	missed	LS	LS	missed	missed	missed	0	4	LS
1056	Chr2	1320000	1330000	Core	missed	missed	LS	missed	missed	missed	missed	LS	missed	LS	missed	LS	missed	LS	LS	0	6	LS
1066	Chr2	1420000	1430000	Core	missed	LS	missed	missed	missed	missed	LS	missed	LS	missed	missed	missed	missed	missed	missed	0	3	LS
1143	Chr2	2190000	2200000	Core	LS	missed	missed	missed	missed	missed	LS	missed	missed	missed	missed	LS	missed	LS	missed	0	4	LS
1180	Chr2	2560000	2570000	Core	missed	LS	missed	missed	missed	missed	missed	missed	missed	missed	LS	missed	LS	missed	missed	0	3	LS
1192	Chr2	2680000	2690000	Core	missed	missed	missed	missed	missed	missed	missed	missed	missed	missed	missed	LS	missed	missed	missed	0	1	LS
1205	Chr2	2810000	2820000	Core	missed	missed	missed	missed	missed	missed	missed	missed	missed	missed	missed	missed	missed	missed	LS	0	1	LS
1206	Chr2	2820000	2830000	Core	missed	missed	missed	Core	LS	missed	missed	missed	missed	LS	missed	missed	missed	missed	missed	1	2	LS
1212	Chr2	2880000	2890000	LS	missed	missed	missed	missed	missed	missed	missed	LS	missed	missed	missed	missed	missed	missed	LS	0	2	LS
1213	Chr2	2890000	2900000	LS	missed	LS	missed	missed	missed	missed	missed	missed	missed	missed	missed	missed	missed	missed	missed	0	1	LS
1214	Chr2	2900000	2910000	LS	LS	missed	missed	missed	missed	missed	missed	missed	missed	missed	missed	missed	LS	missed	LS	0	3	LS
1215	Chr2	2910000	2920000	LS	missed	missed	LS	missed	missed	missed	LS	missed	missed	missed	missed	missed	missed	missed	missed	0	2	LS
1216	Chr2	2920000	2930000	LS	missed	LS	missed	LS	missed	missed	missed	missed	LS	missed	missed	LS	LS	missed	missed	0	5	LS
1217	Chr2	2930000	2940000	LS	missed	missed	missed	missed	missed	missed	LS	missed	missed	LS	missed	missed	missed	missed	missed	0	2	LS
1218	Chr2	2940000	2950000	LS	missed	missed	missed	missed	missed	missed	missed	missed	missed	missed	missed	missed	missed	LS	missed	0	1	LS
1219	Chr2	2950000	2960000	LS	missed	missed	LS	missed	LS	missed	missed	missed	LS	missed	LS	missed	missed	missed	LS	0	5	LS
1221	Chr2	2970000	2980000	LS	missed	missed	missed	LS	missed	missed	LS	missed	missed	missed	LS	missed	missed	missed	LS	0	4	LS
1222	Chr2	2980000	2990000	LS	LS	LS	missed	missed	LS	missed	missed	missed	missed	missed	missed	missed	LS	missed	missed	0	4	LS
1223	Chr2	2990000	3000000	LS	missed	missed	LS	missed	missed	missed	missed	missed	missed	LS	missed	missed	missed	missed	missed	0	2	LS
1227	Chr2	3030000	3040000	Core	missed	missed	missed	LS	missed	missed	missed	missed	missed	missed	missed	missed	missed	missed	missed	0	1	LS
1236	Chr2	3120000	3130000	Core	LS	missed	missed	missed	missed	missed	missed	missed	missed	missed	missed	missed	missed	LS	LS	0	3	LS
1237	Chr2	3130000	3140000	Core	missed	missed	missed	missed	missed	LS	missed	missed	missed	missed	LS	missed	missed	missed	missed	0	2	LS
1238	Chr2	3140000	3150000	Core	LS	LS	missed	missed	missed	missed	missed	missed	missed	LS	missed	missed	missed	LS	missed	0	4	LS
1239	Chr2	3150000	3160000	Core	LS	missed	missed	missed	missed	missed	missed	LS	LS	missed	missed	missed	missed	missed	missed	0	3	LS
1240	Chr2	3160000	3170000	Core	LS	missed	missed	missed	missed	missed	missed	missed	missed	missed	missed	missed	LS	missed	missed	0	2	LS
1241	Chr2	3170000	3180000	Core	LS	missed	missed	missed	missed	missed	missed	missed	missed	LS	missed	missed	missed	missed	missed	0	2	LS
1242	Chr2	3180000	3190000	Core	missed	missed	missed	missed	missed	missed	LS	LS	missed	missed	LS	missed	missed	missed	missed	0	3	LS
1243	Chr2	3190000	3200000	LS	missed	missed	missed	LS	missed	LS	LS	missed	missed	missed	missed	missed	LS	missed	missed	0	4	LS
1244	Chr2	3200000	3210000	LS	LS	missed	missed	missed	missed	missed	missed	missed	missed	missed	missed	missed	missed	LS	missed	0	2	LS
1245	Chr2	3210000	3220000	LS	missed	missed	missed	LS	missed	LS	missed	missed	missed	LS	missed	missed	missed	missed	missed	0	3	LS
1246	Chr2	3220000	3230000	LS	LS	missed	missed	missed	missed	missed	missed	missed	missed	missed	missed	missed	missed	LS	missed	0	2	LS
1247	Chr2	3230000	3240000	LS	missed	missed	missed	missed	missed	missed	missed	missed	LS	LS	missed	missed	missed	LS	missed	0	3	LS
1248	Chr2	3240000	3250000	LS	LS	missed	missed	missed	missed	missed	missed	LS	missed	missed	missed	missed	missed	missed	missed	0	2	LS
1249	Chr2	3250000	3260000	LS	missed	missed	missed	missed	missed	LS	missed	LS	missed	missed	missed	LS	missed	missed	missed	0	3	LS
1250	Chr2	3260000	3270000	LS	missed	missed	LS	missed	missed	missed	missed	missed	missed	missed	missed	missed	missed	missed	LS	0	2	LS
1251	Chr2	3270000	3280000	LS	missed	missed	LS	missed	missed	missed	missed	LS	missed	missed	missed	LS	missed	missed	missed	0	3	LS
1252	Chr2	3280000	3290000	LS	missed	LS	missed	missed	missed	missed	missed	missed	missed	LS	missed	missed	missed	LS	missed	0	3	LS
1253	Chr2	3290000	3300000	LS	missed	missed	LS	missed	missed	missed	missed	missed	missed	missed	missed	missed	missed	missed	missed	0	1	LS
1255	Chr2	3310000	3320000	LS	missed	LS	missed	missed	missed	missed	LS	missed	missed	missed	missed	missed	missed	missed	missed	0	2	LS
1256	Chr2	3320000	3330000	LS	missed	missed	missed	missed	missed	missed	missed	LS	missed	missed	LS	missed	missed	missed	missed	0	2	LS
1257	Chr2	3330000	3340000	LS	LS	LS	missed	LS	LS	LS	LS	missed	missed	missed	LS	missed	missed	missed	missed	0	7	LS
1258	Chr2	3340000	3350000	LS	Core	missed	LS	LS	LS	LS	LS	missed	missed	missed	missed	Core	LS	LS	LS	2	8	LS
1259	Chr2	3350000	3360000	LS	missed	missed	missed	missed	missed	LS	LS	LS	missed	missed	missed	missed	LS	LS	missed	0	5	LS
1262	Chr2	3380000	3390000	LS	missed	missed	LS	missed	missed	missed	missed	missed	missed	missed	missed	missed	LS	missed	missed	0	2	LS
1263	Chr2	3390000	3400000	LS	LS	missed	missed	missed	missed	missed	missed	missed	missed	LS	missed	LS	missed	missed	missed	0	3	LS
1265	Chr2	3410000	3420000	LS	missed	LS	missed	missed	missed	missed	missed	LS	LS	missed	missed	LS	missed	LS	missed	0	5	LS
1267	Chr2	3430000	3440000	LS	missed	missed	LS	missed	LS	missed	missed	missed	missed	missed	missed	missed	missed	missed	missed	0	2	LS
1269	Chr2	3450000	3460000	LS	missed	LS	missed	missed	missed	missed	missed	missed	missed	missed	missed	LS	LS	missed	missed	0	3	LS
1270	Chr2	3480000	3490000	LS	missed	LS	missed	missed	missed	missed	missed	missed	LS	missed	missed	missed	missed	LS	missed	0	3	LS
1272	Chr2	3500000	3510000	LS	missed	missed	missed	missed	missed	LS	missed	missed	missed	missed	LS	missed	missed	missed	missed	0	2	LS
1273	Chr2	3510000	3520000	LS	LS	missed	missed	missed	missed	LS	missed	missed	missed	missed	LS	missed	LS	missed	missed	0	4	LS
1275	Chr2	3530000	3540000	LS	missed	missed	missed	missed	missed	missed	missed	missed	LS	missed	LS	missed	LS	missed	missed	0	3	LS
1276	Chr2	3540000	3550000	LS	missed	LS	missed	missed	missed	missed	LS	missed	missed	missed	missed	missed	missed	missed	LS	0	3	LS
1277	Chr2	3550000	3560000	LS	LS	LS	missed	missed	missed	missed	missed	missed	missed	missed	LS	missed	missed	LS	missed	0	4	LS
1278	Chr2	3560000	3570000	LS	missed	missed	missed	missed	missed	missed	missed	missed	LS	missed	missed	missed	LS	missed	missed	0	2	LS
1281	Chr2	3590000	3600000	LS	missed	missed	missed	LS	missed	LS	missed	LS	missed	LS	missed	missed	missed	missed	missed	0	4	LS
1282	Chr2	3600000	3610000	LS	missed	missed	missed	missed	missed	missed	missed	missed	missed	missed	missed	missed	missed	missed	LS	0	1	LS
1365	Chr3	160000	170000	Core	missed	missed	missed	missed	LS	missed	missed	missed	missed	missed	missed	missed	missed	missed	missed	0	1	LS
1371	Chr3	220000	230000	Core	missed	LS	missed	missed	missed	missed	missed	missed	missed	missed	LS	missed	missed	LS	missed	0	3	LS
1382	Chr3	330000	340000	Core	missed	missed	LS	missed	missed	missed	missed	missed	LS	missed	missed	missed	LS	missed	missed	0	3	LS
1383	Chr3	340000	350000	Core	missed	missed	missed	missed	missed	missed	missed	missed	missed	LS	missed	missed	missed	missed	missed	0	1	LS
1384	Chr3	350000	360000	Core	missed	LS	missed	missed	missed	missed	missed	missed	missed	LS	missed	missed	LS	LS	missed	0	4	LS
1634	Chr3	2850000	2860000	Core	missed	LS	LS	missed	missed	missed	missed	LS	missed	missed	LS	missed	missed	missed	missed	0	4	LS
1724	Chr3	3750000	3760000	Core	LS	missed	missed	missed	LS	missed	missed	missed	missed	missed	missed	LS	missed	LS	missed	0	4	LS
1740	Chr3	3910000	3920000	Core	missed	LS	missed	LS	missed	LS	missed	LS	missed	LS	LS	missed	missed	missed	missed	0	6	LS
1764	Chr3	4150000	4160000	Core	missed	LS	LS	LS	missed	missed	LS	missed	missed	missed	missed	missed	missed	LS	missed	0	5	LS
1765	Chr3	4160000	4168633	Core	missed	missed	missed	missed	missed	missed	missed	missed	missed	missed	LS	missed	missed	missed	missed	0	1	LS
1766	Chr4	0	10000	Core	missed	missed	missed	missed	missed	missed	missed	missed	missed	missed	missed	missed	missed	missed	LS	0	1	LS
1794	Chr4	280000	290000	Core	missed	missed	missed	LS	missed	missed	missed	missed	missed	missed	missed	missed	missed	missed	missed	0	1	LS
1795	Chr4	290000	300000	Core	missed	missed	missed	LS	LS	missed	missed	missed	missed	missed	missed	missed	missed	missed	missed	0	2	LS
1824	Chr4	580000	590000	Core	LS	missed	LS	missed	missed	LS	missed	missed	missed	missed	missed	missed	missed	missed	missed	0	3	LS
1859	Chr4	930000	940000	Core	missed	missed	missed	missed	missed	missed	LS	LS	missed	missed	missed	LS	missed	missed	missed	0	3	LS
1860	Chr4	940000	950000	Core	missed	missed	missed	missed	LS	LS	missed	missed	missed	LS	missed	missed	missed	missed	missed	0	3	LS
1861	Chr4	950000	960000	Core	missed	missed	missed	LS	missed	missed	missed	missed	missed	missed	missed	missed	Core	missed	LS	1	2	LS
1862	Chr4	960000	970000	Core	missed	LS	missed	missed	LS	missed	LS	missed	missed	missed	LS	missed	missed	missed	missed	0	4	LS
1863	Chr4	970000	980000	Core	missed	missed	missed	missed	missed	missed	missed	missed	missed	LS	LS	missed	missed	missed	LS	0	3	LS
1864	Chr4	980000	990000	Core	missed	missed	missed	missed	missed	missed	LS	LS	missed	LS	missed	missed	missed	missed	missed	0	3	LS
1868	Chr4	1020000	1030000	Core	missed	missed	missed	LS	missed	missed	missed	missed	LS	missed	missed	missed	LS	LS	LS	0	5	LS
1869	Chr4	1030000	1040000	Core	LS	LS	missed	LS	missed	missed	missed	missed	missed	LS	missed	missed	missed	missed	missed	0	4	LS
1870	Chr4	1040000	1050000	LS	missed	missed	missed	missed	LS	missed	missed	missed	missed	missed	LS	missed	missed	missed	missed	0	2	LS
1871	Chr4	1050000	1060000	LS	missed	missed	missed	missed	missed	LS	missed	missed	missed	missed	LS	missed	missed	LS	missed	0	3	LS
1872	Chr4	1060000	1070000	LS	LS	missed	missed	LS	missed	missed	missed	LS	missed	missed	LS	missed	missed	missed	LS	0	5	LS
1873	Chr4	1070000	1080000	LS	missed	LS	missed	missed	missed	missed	LS	missed	missed	missed	missed	missed	missed	missed	missed	0	2	LS
1876	Chr4	1100000	1110000	LS	missed	Core	missed	missed	LS	missed	missed	missed	LS	missed	missed	missed	LS	missed	LS	1	4	LS
1877	Chr4	1110000	1120000	LS	missed	missed	LS	LS	LS	missed	missed	missed	missed	missed	missed	LS	missed	missed	missed	0	4	LS
1878	Chr4	1120000	1130000	LS	missed	missed	missed	missed	missed	missed	missed	LS	missed	missed	LS	missed	missed	missed	missed	0	2	LS
1879	Chr4	1130000	1140000	LS	missed	LS	missed	missed	missed	missed	missed	missed	missed	missed	missed	LS	LS	LS	missed	0	4	LS
1880	Chr4	1140000	1150000	LS	LS	missed	missed	missed	missed	missed	missed	missed	missed	missed	missed	missed	missed	missed	missed	0	1	LS
1881	Chr4	1150000	1160000	LS	missed	missed	missed	missed	missed	missed	missed	missed	missed	missed	missed	LS	missed	missed	missed	0	1	LS
1882	Chr4	1160000	1170000	LS	missed	missed	missed	missed	missed	missed	missed	missed	missed	LS	missed	missed	missed	missed	missed	0	1	LS
1883	Chr4	1170000	1180000	LS	missed	missed	missed	missed	missed	missed	missed	LS	missed	LS	missed	missed	missed	missed	missed	0	2	LS
1884	Chr4	1180000	1190000	LS	LS	LS	missed	missed	missed	missed	missed	missed	missed	missed	LS	missed	missed	missed	missed	0	3	LS
1885	Chr4	1190000	1200000	LS	missed	missed	missed	missed	missed	missed	missed	LS	missed	LS	missed	missed	missed	missed	missed	0	2	LS
1886	Chr4	1200000	1210000	LS	missed	missed	LS	missed	LS	LS	LS	missed	LS	LS	missed	missed	missed	missed	LS	0	7	LS
1888	Chr4	1220000	1230000	LS	missed	missed	missed	missed	LS	LS	missed	missed	missed	missed	missed	missed	missed	missed	missed	0	2	LS
1889	Chr4	1230000	1240000	LS	missed	missed	missed	missed	missed	missed	missed	LS	LS	missed	missed	missed	missed	missed	missed	0	2	LS
1891	Chr4	1250000	1260000	LS	missed	LS	LS	missed	missed	Core	missed	missed	missed	LS	missed	missed	missed	missed	missed	1	3	LS
1894	Chr4	1280000	1290000	LS	LS	missed	missed	LS	missed	missed	missed	missed	missed	missed	missed	missed	missed	missed	missed	0	2	LS
1895	Chr4	1290000	1300000	LS	missed	missed	missed	missed	missed	missed	missed	missed	missed	LS	missed	missed	missed	missed	missed	0	1	LS
1897	Chr4	1310000	1320000	LS	missed	missed	missed	missed	missed	missed	missed	missed	missed	missed	LS	missed	missed	missed	missed	0	1	LS
1899	Chr4	1330000	1340000	LS	LS	missed	missed	missed	LS	missed	missed	LS	missed	LS	missed	LS	missed	missed	LS	0	6	LS
1900	Chr4	1340000	1350000	LS	missed	missed	missed	missed	LS	missed	LS	missed	missed	missed	missed	missed	LS	missed	missed	0	3	LS
1901	Chr4	1350000	1360000	LS	missed	missed	missed	missed	LS	missed	missed	missed	missed	missed	missed	missed	missed	missed	LS	0	2	LS
1902	Chr4	1360000	1370000	LS	missed	missed	LS	LS	LS	missed	LS	LS	missed	missed	LS	missed	missed	LS	missed	0	7	LS
1903	Chr4	1370000	1380000	LS	missed	missed	missed	missed	LS	missed	missed	missed	missed	missed	missed	missed	LS	missed	LS	0	3	LS
1904	Chr4	1380000	1390000	LS	LS	missed	missed	missed	missed	missed	missed	LS	missed	missed	missed	missed	missed	LS	missed	0	3	LS
1905	Chr4	1390000	1400000	LS	missed	missed	missed	missed	LS	missed	LS	missed	missed	missed	missed	missed	missed	missed	LS	0	3	LS
1906	Chr4	1400000	1410000	LS	missed	missed	missed	missed	missed	missed	LS	missed	LS	missed	missed	missed	LS	missed	LS	0	4	LS
1907	Chr4	1410000	1420000	LS	missed	LS	missed	missed	missed	LS	LS	missed	missed	LS	missed	missed	missed	missed	LS	0	5	LS
1908	Chr4	1420000	1430000	LS	missed	missed	missed	missed	missed	missed	missed	LS	missed	LS	LS	missed	LS	missed	missed	0	4	LS
1909	Chr4	1430000	1440000	LS	missed	missed	missed	missed	missed	missed	LS	missed	LS	LS	missed	LS	LS	missed	LS	0	6	LS
1910	Chr4	1440000	1450000	LS	missed	missed	missed	missed	missed	missed	missed	missed	missed	LS	missed	missed	missed	LS	missed	0	2	LS
1911	Chr4	1450000	1460000	LS	missed	missed	LS	missed	missed	LS	LS	missed	missed	missed	missed	missed	missed	LS	missed	0	4	LS
1912	Chr4	1460000	1470000	LS	missed	LS	missed	missed	missed	missed	missed	LS	missed	missed	missed	missed	missed	missed	missed	0	2	LS
1913	Chr4	1470000	1480000	LS	missed	missed	LS	missed	missed	missed	missed	LS	LS	missed	missed	missed	missed	missed	missed	0	3	LS
1917	Chr4	1510000	1520000	Core	missed	missed	missed	missed	missed	missed	missed	LS	missed	missed	missed	missed	LS	LS	missed	0	3	LS
1919	Chr4	1530000	1540000	Core	missed	missed	missed	missed	missed	missed	missed	missed	missed	missed	LS	missed	missed	LS	missed	0	2	LS
1926	Chr4	1600000	1610000	Core	missed	missed	missed	LS	missed	missed	missed	missed	LS	LS	missed	missed	missed	missed	missed	0	3	LS
2092	Chr4	3260000	3270000	Core	LS	missed	missed	LS	missed	missed	missed	missed	missed	missed	missed	missed	missed	missed	missed	0	2	LS
2099	Chr4	3330000	3340000	Core	missed	missed	missed	missed	missed	LS	missed	LS	LS	missed	missed	missed	missed	missed	missed	0	3	LS
2104	Chr4	3380000	3390000	Core	missed	missed	missed	missed	missed	missed	missed	LS	missed	LS	Core	missed	LS	missed	missed	1	3	LS
2106	Chr4	3400000	3410000	Core	missed	missed	missed	missed	missed	missed	missed	missed	missed	LS	missed	LS	missed	missed	missed	0	2	LS
2110	Chr4	3440000	3450000	Core	missed	missed	LS	LS	missed	missed	missed	missed	missed	missed	missed	missed	missed	missed	missed	0	2	LS
2120	Chr4	3540000	3550000	Core	missed	missed	LS	missed	missed	missed	Core	missed	missed	missed	LS	missed	missed	missed	missed	1	2	LS
2121	Chr4	3550000	3560000	Core	LS	missed	missed	missed	missed	missed	LS	missed	missed	missed	missed	missed	missed	LS	missed	0	3	LS
2123	Chr4	3570000	3580000	Core	missed	missed	missed	missed	missed	missed	LS	LS	missed	missed	missed	missed	missed	missed	LS	0	3	LS
2129	Chr4	3630000	3640000	Core	missed	LS	missed	missed	missed	missed	missed	missed	missed	missed	missed	missed	LS	missed	missed	0	2	LS
2131	Chr4	3650000	3660000	Core	missed	LS	LS	Core	missed	missed	missed	LS	missed	Core	missed	missed	missed	missed	missed	2	3	LS
2132	Chr4	3660000	3670000	Core	missed	missed	missed	LS	missed	missed	LS	LS	missed	LS	missed	LS	missed	missed	missed	0	5	LS
2136	Chr4	3700000	3710000	Core	missed	LS	missed	missed	missed	missed	missed	missed	LS	missed	missed	missed	missed	missed	missed	0	2	LS
2143	Chr4	3770000	3780000	Core	missed	missed	missed	missed	missed	missed	missed	LS	missed	missed	missed	missed	LS	missed	missed	0	2	LS
2154	Chr4	3880000	3890000	Core	LS	missed	missed	missed	missed	missed	missed	missed	missed	missed	missed	LS	missed	missed	missed	0	2	LS
2162	Chr4	3960000	3970000	Core	missed	missed	LS	missed	missed	missed	missed	LS	missed	missed	missed	LS	LS	missed	missed	0	4	LS
2170	Chr4	4040000	4050000	Core	LS	missed	missed	LS	LS	missed	LS	missed	missed	Core	missed	Core	missed	missed	missed	2	4	LS
2171	Chr4	4050000	4060000	Core	missed	missed	missed	LS	missed	missed	LS	missed	LS	missed	missed	missed	LS	missed	missed	0	4	LS
2172	Chr4	4060000	4070000	Core	LS	missed	LS	missed	missed	missed	missed	missed	missed	missed	missed	missed	missed	missed	missed	0	2	LS
2173	Chr4	4070000	4080000	Core	missed	missed	missed	missed	missed	missed	LS	missed	missed	missed	missed	missed	LS	LS	missed	0	3	LS
2175	Chr5	0	10000	Core	missed	missed	missed	missed	missed	missed	missed	missed	missed	missed	LS	LS	missed	missed	LS	0	3	LS
2177	Chr5	20000	30000	Core	LS	missed	missed	missed	missed	missed	missed	missed	LS	missed	LS	missed	LS	LS	missed	0	5	LS
2222	Chr5	470000	480000	Core	LS	LS	missed	missed	missed	missed	missed	missed	missed	missed	missed	missed	missed	missed	LS	0	3	LS
2230	Chr5	550000	560000	Core	missed	missed	LS	missed	LS	missed	missed	missed	missed	missed	LS	missed	missed	missed	missed	0	3	LS
2232	Chr5	570000	580000	Core	missed	LS	missed	missed	missed	missed	missed	missed	missed	missed	missed	missed	missed	LS	LS	0	3	LS
2233	Chr5	580000	590000	Core	missed	missed	missed	missed	missed	LS	missed	missed	missed	missed	missed	missed	LS	missed	LS	0	3	LS
2234	Chr5	590000	600000	Core	LS	missed	missed	missed	missed	missed	missed	LS	missed	missed	LS	LS	missed	missed	missed	0	4	LS
2235	Chr5	600000	610000	Core	missed	missed	missed	missed	missed	missed	missed	LS	missed	LS	missed	missed	missed	missed	missed	0	2	LS
2236	Chr5	610000	620000	Core	missed	missed	missed	missed	missed	LS	missed	missed	missed	LS	missed	missed	missed	missed	missed	0	2	LS
2238	Chr5	630000	640000	LS	missed	missed	missed	LS	missed	missed	LS	missed	missed	missed	missed	missed	missed	missed	missed	0	2	LS
2239	Chr5	640000	650000	LS	LS	missed	missed	LS	missed	missed	missed	missed	missed	missed	LS	LS	missed	LS	LS	0	6	LS
2240	Chr5	650000	660000	LS	missed	missed	missed	missed	LS	missed	missed	missed	missed	LS	missed	missed	missed	missed	LS	0	3	LS
2241	Chr5	660000	670000	LS	missed	missed	missed	missed	missed	missed	missed	missed	missed	LS	missed	missed	missed	missed	missed	0	1	LS
2242	Chr5	670000	680000	LS	missed	missed	missed	LS	missed	missed	missed	missed	missed	missed	missed	missed	missed	missed	missed	0	1	LS
2243	Chr5	680000	690000	LS	missed	missed	missed	LS	missed	missed	LS	missed	missed	missed	missed	missed	missed	missed	missed	0	2	LS
2245	Chr5	700000	710000	LS	missed	missed	missed	missed	LS	missed	missed	missed	LS	missed	missed	missed	missed	missed	missed	0	2	LS
2246	Chr5	710000	720000	LS	missed	missed	missed	missed	missed	missed	LS	missed	missed	missed	missed	LS	missed	missed	missed	0	2	LS
2247	Chr5	720000	730000	LS	missed	missed	missed	missed	missed	missed	missed	missed	LS	missed	missed	missed	missed	missed	missed	0	1	LS
2248	Chr5	730000	740000	LS	missed	LS	missed	missed	missed	missed	missed	missed	missed	missed	missed	missed	LS	LS	missed	0	3	LS
2249	Chr5	740000	750000	LS	missed	missed	LS	LS	missed	missed	missed	missed	missed	missed	missed	missed	missed	missed	missed	0	2	LS
2250	Chr5	750000	760000	LS	missed	missed	missed	LS	missed	LS	missed	LS	LS	missed	missed	missed	missed	missed	missed	0	4	LS
2251	Chr5	760000	770000	LS	missed	missed	missed	missed	missed	missed	LS	LS	missed	missed	missed	missed	LS	missed	missed	0	3	LS
2252	Chr5	770000	780000	LS	LS	missed	LS	missed	missed	LS	missed	LS	missed	LS	missed	missed	missed	missed	missed	0	5	LS
2254	Chr5	790000	800000	LS	missed	missed	LS	missed	missed	LS	missed	missed	missed	missed	missed	LS	missed	LS	missed	0	4	LS
2255	Chr5	800000	810000	LS	LS	missed	missed	missed	missed	missed	missed	missed	LS	missed	missed	missed	LS	missed	missed	0	3	LS
2256	Chr5	810000	820000	LS	LS	LS	missed	missed	missed	missed	missed	missed	LS	missed	missed	missed	missed	missed	missed	0	3	LS
2257	Chr5	820000	830000	LS	missed	LS	missed	LS	LS	missed	missed	missed	missed	missed	missed	missed	missed	LS	missed	0	4	LS
2258	Chr5	830000	840000	LS	missed	missed	missed	LS	LS	missed	LS	missed	LS	missed	LS	missed	missed	missed	LS	0	6	LS
2262	Chr5	870000	880000	LS	missed	LS	missed	missed	missed	LS	missed	missed	missed	LS	missed	missed	missed	LS	missed	0	4	LS
2265	Chr5	900000	910000	LS	missed	missed	LS	missed	missed	missed	missed	LS	missed	missed	LS	missed	missed	missed	missed	0	3	LS
2266	Chr5	910000	920000	LS	missed	LS	missed	missed	LS	missed	missed	missed	LS	missed	missed	LS	missed	missed	missed	0	4	LS
2267	Chr5	920000	930000	LS	missed	missed	missed	missed	missed	missed	missed	LS	missed	missed	missed	missed	missed	missed	missed	0	1	LS
2270	Chr5	950000	960000	LS	missed	missed	missed	missed	missed	missed	missed	missed	missed	missed	LS	missed	LS	missed	missed	0	2	LS
2271	Chr5	960000	970000	LS	missed	missed	missed	missed	LS	missed	missed	missed	missed	LS	missed	missed	missed	missed	missed	0	2	LS
2272	Chr5	970000	980000	LS	missed	missed	LS	LS	missed	missed	missed	LS	missed	missed	missed	LS	LS	missed	missed	0	5	LS
2273	Chr5	980000	990000	LS	missed	LS	missed	LS	missed	LS	missed	missed	missed	missed	missed	missed	missed	missed	missed	0	3	LS
2274	Chr5	990000	1000000	LS	LS	missed	missed	missed	LS	missed	missed	missed	missed	missed	missed	LS	missed	missed	missed	0	3	LS
2276	Chr5	1010000	1020000	LS	missed	missed	missed	missed	LS	missed	missed	missed	missed	LS	missed	missed	missed	missed	missed	0	2	LS
2277	Chr5	1020000	1030000	LS	LS	missed	missed	LS	missed	missed	missed	missed	LS	missed	LS	LS	missed	missed	missed	0	5	LS
2279	Chr5	1040000	1050000	LS	missed	LS	missed	missed	LS	missed	missed	missed	missed	missed	missed	missed	missed	LS	missed	0	3	LS
2280	Chr5	1050000	1060000	LS	LS	missed	missed	missed	missed	LS	missed	missed	missed	missed	missed	missed	missed	missed	missed	0	2	LS
2301	Chr5	1260000	1270000	Core	LS	missed	LS	missed	missed	missed	LS	LS	LS	missed	missed	Core	missed	missed	LS	1	6	LS
2306	Chr5	1310000	1320000	Core	missed	missed	missed	LS	missed	missed	LS	missed	missed	missed	missed	missed	missed	LS	missed	0	3	LS
2313	Chr5	1380000	1390000	Core	missed	missed	missed	missed	missed	missed	missed	missed	LS	missed	missed	missed	missed	missed	missed	0	1	LS
2323	Chr5	1480000	1490000	Core	missed	missed	missed	LS	missed	LS	missed	missed	LS	missed	missed	missed	missed	missed	missed	0	3	LS
2432	Chr5	2570000	2580000	Core	missed	missed	missed	missed	missed	missed	missed	missed	LS	missed	missed	missed	LS	missed	missed	0	2	LS
2513	Chr5	3380000	3390000	Core	LS	missed	missed	missed	missed	missed	missed	missed	missed	missed	missed	missed	missed	missed	missed	0	1	LS
2514	Chr5	3390000	3400000	Core	LS	missed	missed	LS	LS	LS	missed	missed	missed	LS	missed	missed	missed	missed	missed	0	5	LS
2515	Chr5	3400000	3410000	Core	LS	missed	missed	LS	missed	missed	missed	missed	missed	missed	LS	missed	missed	missed	missed	0	3	LS
2517	Chr5	3420000	3430000	Core	missed	missed	missed	missed	missed	missed	missed	missed	missed	missed	missed	LS	missed	LS	LS	0	3	LS
2518	Chr5	3430000	3440000	Core	missed	missed	missed	missed	LS	LS	LS	missed	missed	missed	LS	LS	missed	missed	missed	0	5	LS
2519	Chr5	3440000	3450000	Core	missed	missed	missed	missed	missed	missed	missed	missed	missed	missed	missed	missed	missed	LS	LS	0	2	LS
2520	Chr5	3450000	3460000	Core	missed	missed	missed	missed	missed	missed	LS	missed	missed	missed	LS	missed	missed	missed	missed	0	2	LS
2521	Chr5	3460000	3470000	Core	missed	LS	missed	missed	missed	missed	missed	missed	missed	missed	LS	missed	missed	missed	LS	0	3	LS
2522	Chr5	3470000	3480000	Core	missed	LS	LS	missed	missed	missed	missed	missed	missed	LS	missed	missed	missed	missed	LS	0	4	LS
2523	Chr5	3480000	3490000	Core	missed	missed	missed	missed	missed	missed	missed	missed	missed	missed	LS	missed	missed	missed	missed	0	1	LS
2524	Chr5	3490000	3500000	LS	missed	missed	missed	missed	missed	missed	LS	missed	missed	missed	missed	missed	missed	missed	missed	0	1	LS
2525	Chr5	3500000	3510000	LS	missed	missed	missed	missed	missed	missed	missed	missed	missed	missed	LS	LS	missed	missed	missed	0	2	LS
2526	Chr5	3510000	3520000	LS	missed	missed	missed	missed	missed	missed	missed	LS	LS	missed	missed	LS	missed	missed	missed	0	3	LS
2527	Chr5	3520000	3530000	LS	missed	missed	missed	LS	missed	LS	missed	missed	missed	missed	missed	missed	LS	missed	LS	0	4	LS
2528	Chr5	3530000	3540000	LS	LS	missed	missed	missed	missed	missed	missed	missed	missed	missed	missed	missed	LS	LS	missed	0	3	LS
2529	Chr5	3540000	3550000	LS	missed	missed	missed	missed	missed	missed	missed	missed	missed	missed	missed	missed	missed	missed	LS	0	1	LS
2530	Chr5	3550000	3560000	LS	missed	missed	missed	missed	missed	missed	missed	missed	missed	missed	LS	missed	missed	missed	missed	0	1	LS
2531	Chr5	3560000	3570000	LS	missed	missed	missed	missed	missed	missed	missed	missed	missed	missed	missed	missed	missed	missed	LS	0	1	LS
2535	Chr5	3600000	3610000	LS	missed	missed	missed	missed	missed	missed	missed	missed	missed	missed	missed	LS	missed	missed	missed	0	1	LS
2540	Chr5	3650000	3660000	LS	missed	missed	missed	missed	missed	missed	missed	missed	missed	missed	missed	LS	missed	missed	missed	0	1	LS
2542	Chr5	3670000	3680000	LS	missed	missed	missed	LS	missed	missed	missed	LS	missed	missed	missed	missed	missed	LS	LS	0	4	LS
2543	Chr5	3680000	3690000	LS	missed	missed	LS	missed	missed	missed	LS	missed	missed	missed	missed	missed	missed	missed	LS	0	3	LS
2550	Chr5	3750000	3760000	Core	LS	missed	missed	missed	missed	LS	missed	missed	missed	LS	missed	missed	missed	missed	LS	0	4	LS
2552	Chr5	3770000	3780000	Core	LS	missed	missed	LS	missed	missed	missed	missed	missed	missed	missed	missed	missed	missed	missed	0	2	LS
2568	Chr5	3930000	3940000	Core	missed	missed	missed	missed	LS	missed	missed	LS	LS	missed	LS	missed	missed	missed	missed	0	4	LS
2573	Chr5	3980000	3990000	Core	missed	LS	missed	missed	LS	LS	LS	missed	missed	missed	missed	missed	missed	missed	missed	0	4	LS
2574	Chr5	3990000	4000000	Core	missed	missed	missed	missed	missed	missed	missed	LS	LS	missed	missed	missed	missed	missed	missed	0	2	LS
2591	Chr5	4160000	4170000	Core	LS	missed	missed	missed	LS	missed	LS	missed	missed	missed	missed	missed	missed	missed	missed	0	3	LS
2593	Chr6	0	10000	Core	LS	missed	missed	missed	missed	LS	missed	missed	missed	missed	LS	LS	missed	LS	missed	0	5	LS
2594	Chr6	10000	20000	Core	missed	missed	missed	missed	LS	missed	missed	missed	missed	LS	missed	missed	missed	missed	LS	0	3	LS
2610	Chr6	170000	180000	Core	missed	missed	missed	missed	missed	missed	missed	missed	LS	missed	missed	missed	missed	missed	LS	0	2	LS
2651	Chr6	580000	590000	Core	LS	missed	missed	missed	missed	missed	missed	missed	missed	missed	missed	missed	missed	missed	missed	0	1	LS
2653	Chr6	600000	610000	Core	LS	missed	missed	missed	missed	missed	missed	missed	missed	missed	missed	missed	missed	missed	LS	0	2	LS
2661	Chr6	680000	690000	Core	missed	missed	missed	LS	missed	LS	missed	missed	missed	missed	missed	missed	missed	missed	missed	0	2	LS
2678	Chr6	850000	860000	Core	LS	LS	missed	missed	missed	LS	missed	missed	missed	missed	missed	missed	LS	LS	missed	0	5	LS
2679	Chr6	860000	870000	Core	missed	missed	missed	missed	LS	missed	missed	missed	missed	missed	missed	missed	missed	missed	missed	0	1	LS
2740	Chr6	1470000	1480000	Core	LS	missed	LS	missed	missed	missed	LS	missed	missed	missed	missed	missed	missed	missed	missed	0	3	LS
2743	Chr6	1500000	1510000	Core	missed	missed	LS	missed	missed	missed	missed	Core	LS	missed	missed	missed	missed	missed	missed	1	2	LS
2750	Chr6	1570000	1580000	Core	missed	missed	missed	missed	missed	LS	missed	LS	missed	missed	missed	missed	missed	missed	LS	0	3	LS
2899	Chr6	3060000	3070000	Core	missed	missed	LS	missed	missed	missed	missed	missed	missed	missed	missed	missed	LS	missed	missed	0	2	LS
2904	Chr6	3110000	3120000	Core	missed	missed	missed	LS	missed	missed	missed	LS	missed	missed	missed	missed	missed	missed	missed	0	2	LS
2909	Chr6	3160000	3170000	Core	missed	missed	missed	missed	LS	missed	missed	missed	missed	missed	missed	missed	missed	missed	LS	0	2	LS
2910	Chr6	3170000	3180000	Core	missed	missed	missed	missed	missed	missed	LS	missed	missed	missed	missed	missed	missed	LS	missed	0	2	LS
2911	Chr6	3180000	3190000	Core	LS	missed	missed	missed	missed	missed	missed	missed	missed	missed	missed	missed	LS	LS	missed	0	3	LS
2912	Chr6	3190000	3200000	Core	LS	LS	missed	missed	missed	missed	missed	missed	missed	missed	missed	missed	LS	missed	missed	0	3	LS
2913	Chr6	3200000	3210000	Core	missed	missed	missed	missed	missed	missed	missed	missed	LS	LS	missed	missed	missed	missed	missed	0	2	LS
2914	Chr6	3210000	3220000	Core	missed	missed	LS	missed	missed	missed	missed	LS	missed	missed	missed	missed	missed	missed	LS	0	3	LS
2915	Chr6	3220000	3230000	Core	LS	LS	missed	missed	missed	missed	missed	missed	missed	missed	missed	LS	missed	missed	missed	0	3	LS
2930	Chr6	3370000	3380000	Core	missed	missed	missed	missed	missed	missed	LS	missed	missed	missed	missed	missed	LS	missed	missed	0	2	LS
2931	Chr6	3380000	3390000	Core	missed	missed	LS	missed	missed	missed	missed	missed	missed	missed	missed	LS	missed	missed	missed	0	2	LS
2944	Chr6	3510000	3520000	Core	missed	missed	missed	missed	missed	missed	LS	missed	missed	LS	missed	missed	missed	missed	missed	0	2	LS
2945	Chr6	3520000	3530000	Core	missed	missed	missed	LS	LS	missed	LS	missed	missed	missed	missed	LS	missed	missed	missed	0	4	LS
2948	Chr7	10000	20000	Core	missed	Core	LS	missed	LS	missed	LS	missed	LS	missed	missed	LS	missed	missed	missed	1	5	LS
3268	Chr7	3210000	3220000	Core	LS	missed	missed	missed	missed	LS	missed	missed	missed	missed	missed	missed	LS	missed	LS	0	4	LS
3275	Chr8	0	10000	Core	missed	missed	missed	LS	missed	missed	missed	missed	missed	missed	missed	LS	missed	LS	missed	0	3	LS
3276	Chr8	10000	20000	Core	missed	missed	LS	LS	missed	missed	LS	LS	missed	LS	LS	missed	LS	missed	missed	0	7	LS
3277	Chr8	20000	30000	Core	LS	missed	missed	missed	missed	missed	missed	missed	LS	missed	missed	LS	missed	missed	missed	0	3	LS
3278	Chr8	30000	40000	Core	missed	missed	missed	missed	missed	missed	missed	missed	LS	missed	LS	missed	missed	missed	missed	0	2	LS
3300	Chr8	250000	260000	Core	missed	missed	missed	LS	missed	missed	missed	LS	missed	LS	missed	missed	missed	missed	missed	0	3	LS
3307	Chr8	320000	330000	Core	missed	missed	missed	missed	missed	missed	missed	LS	LS	missed	missed	missed	missed	missed	missed	0	2	LS
3316	Chr8	410000	420000	Core	LS	missed	LS	missed	missed	missed	missed	LS	LS	missed	LS	LS	missed	missed	missed	0	6	LS
3317	Chr8	420000	430000	Core	missed	missed	missed	missed	missed	missed	missed	missed	missed	missed	LS	missed	LS	missed	LS	0	3	LS
3318	Chr8	430000	440000	Core	missed	LS	LS	missed	missed	missed	missed	missed	missed	missed	LS	LS	missed	missed	missed	0	4	LS
3327	Chr8	520000	530000	Core	missed	missed	missed	missed	LS	missed	missed	missed	missed	missed	LS	missed	LS	LS	LS	0	5	LS
3352	Chr8	770000	780000	Core	missed	missed	missed	missed	LS	LS	LS	missed	missed	missed	missed	missed	missed	LS	missed	0	4	LS
3355	Chr8	800000	810000	Core	missed	LS	missed	LS	missed	missed	missed	missed	missed	missed	missed	missed	missed	missed	missed	0	2	LS
3363	Chr8	880000	890000	Core	missed	missed	missed	missed	missed	missed	missed	LS	missed	missed	missed	missed	LS	LS	missed	0	3	LS
3368	Chr8	930000	940000	Core	missed	missed	missed	LS	LS	missed	missed	missed	LS	missed	LS	missed	missed	missed	missed	0	4	LS
3544	Chr8	2690000	2700000	Core	missed	LS	missed	missed	missed	missed	missed	missed	missed	missed	missed	missed	missed	missed	missed	0	1	LS
3545	Chr8	2700000	2710000	Core	missed	missed	missed	missed	missed	missed	missed	missed	LS	missed	missed	missed	missed	missed	missed	0	1	LS
3546	Chr8	2710000	2720000	Core	missed	LS	missed	missed	missed	missed	missed	LS	missed	missed	missed	missed	missed	missed	missed	0	2	LS
3551	Chr8	2760000	2770000	Core	missed	missed	missed	LS	LS	missed	missed	missed	missed	missed	missed	missed	missed	missed	missed	0	2	LS
3555	Chr8	2800000	2810000	Core	missed	missed	missed	LS	missed	missed	missed	missed	missed	LS	missed	missed	missed	missed	missed	0	2	LS
3558	Chr8	2830000	2840000	Core	missed	missed	LS	missed	missed	missed	LS	missed	LS	LS	missed	missed	LS	missed	missed	0	5	LS
3559	Chr8	2840000	2850000	Core	missed	missed	missed	missed	missed	missed	missed	missed	missed	missed	missed	missed	LS	missed	missed	0	1	LS
3560	Chr8	2850000	2860000	Core	missed	LS	missed	missed	LS	missed	missed	missed	missed	missed	missed	missed	missed	missed	missed	0	2	LS
3569	Chr8	2940000	2950000	Core	LS	LS	Core	LS	missed	missed	missed	missed	LS	missed	missed	missed	missed	missed	missed	1	4	LS
3595	Chr8	3200000	3210000	Core	missed	missed	missed	missed	missed	Core	LS	missed	missed	missed	missed	LS	missed	LS	missed	1	3	LS
3606	Chr8	3310000	3320000	Core	missed	Core	missed	missed	missed	Core	missed	missed	LS	missed	missed	LS	missed	LS	missed	2	3	LS
3608	Chr8	3330000	3340000	Core	LS	missed	missed	missed	missed	missed	Core	missed	LS	missed	missed	missed	missed	missed	missed	1	2	LS
3609	Chr8	3340000	3350000	Core	missed	missed	missed	missed	missed	missed	missed	missed	missed	LS	missed	missed	missed	missed	missed	0	1	LS
Missed, regions that were not included in the 20% testing for that round of prediction; CoreCount, row sum of the number of core predictions for that region across the 15 trials; LScount, row sum fo the number of LS predictions for that region across the 15 trials; Final Pred, the consensus designation of a region was determined by the greater of the counts of Core or LS predictions across the 15…

## Sheet: table10_RF_LSregions
table 10. RF LS prediction results for each of the 15 rounds of training and testing
Index	Chr	start	end	Original Classification	pred1	pred2	pred3	pred4	pred5	pred6	pred7	pred8	pred9	pred10	pred11	pred12	pred13	pred14	pred15	Core Count	LS Count	Final Pred
28	Chr1	320000	330000	Core	missed	missed	missed	missed	missed	missed	LS	missed	Core	missed	missed	missed	missed	LS	missed	1	2	LS
95	Chr1	990000	1000000	Core	missed	missed	missed	LS	missed	missed	missed	missed	LS	missed	missed	LS	missed	missed	missed	0	3	LS
165	Chr1	1690000	1700000	Core	missed	LS	missed	missed	missed	LS	missed	missed	missed	LS	LS	LS	missed	missed	missed	0	5	LS
207	Chr1	2110000	2120000	Core	missed	missed	missed	LS	missed	missed	missed	missed	missed	missed	missed	missed	missed	missed	missed	0	1	LS
368	Chr1	3720000	3730000	Core	missed	missed	missed	missed	missed	missed	missed	missed	missed	missed	missed	missed	missed	LS	missed	0	1	LS
373	Chr1	3770000	3780000	Core	missed	missed	Core	LS	missed	LS	missed	missed	missed	missed	missed	missed	missed	missed	missed	1	2	LS
425	Chr1	4290000	4300000	Core	missed	LS	missed	LS	missed	missed	missed	missed	missed	missed	missed	LS	Core	missed	missed	1	3	LS
432	Chr1	4360000	4370000	Core	missed	missed	missed	missed	LS	LS	missed	LS	missed	missed	missed	missed	missed	missed	missed	0	3	LS
506	Chr1	5100000	5110000	Core	LS	missed	missed	missed	missed	missed	LS	missed	missed	missed	missed	LS	missed	missed	missed	0	3	LS
637	Chr1	6410000	6420000	Core	LS	missed	missed	Core	missed	missed	missed	Core	LS	LS	missed	missed	missed	Core	LS	3	4	LS
695	Chr1	6990000	7000000	Core	missed	missed	missed	missed	LS	missed	missed	missed	missed	missed	LS	LS	missed	missed	missed	0	3	LS
702	Chr1	7060000	7070000	Core	missed	missed	missed	missed	missed	missed	missed	missed	missed	missed	missed	LS	missed	Core	LS	1	2	LS
704	Chr1	7080000	7090000	Core	missed	missed	missed	missed	missed	missed	missed	missed	LS	LS	missed	Core	missed	LS	missed	1	3	LS
744	Chr1	7480000	7490000	Core	LS	LS	missed	LS	missed	missed	missed	missed	missed	missed	missed	missed	missed	missed	missed	0	3	LS
745	Chr1	7490000	7500000	Core	missed	missed	LS	missed	missed	LS	missed	missed	missed	missed	missed	missed	missed	missed	missed	0	2	LS
746	Chr1	7500000	7510000	Core	LS	LS	missed	missed	missed	LS	missed	LS	missed	missed	missed	missed	missed	missed	missed	0	4	LS
759	Chr1	7630000	7640000	Core	missed	missed	missed	missed	missed	LS	LS	missed	missed	missed	missed	missed	missed	LS	missed	0	3	LS
761	Chr1	7650000	7660000	Core	missed	missed	missed	missed	missed	missed	LS	LS	missed	missed	missed	missed	missed	missed	missed	0	2	LS
767	Chr1	7710000	7720000	Core	missed	missed	missed	missed	missed	missed	LS	missed	missed	missed	missed	missed	missed	missed	missed	0	1	LS
776	Chr1	7800000	7810000	Core	missed	missed	missed	missed	missed	missed	missed	missed	LS	missed	missed	missed	missed	LS	missed	0	2	LS
780	Chr1	7840000	7850000	Core	missed	missed	missed	missed	missed	missed	missed	LS	missed	missed	missed	LS	missed	missed	missed	0	2	LS
826	Chr1	8300000	8310000	Core	missed	missed	missed	LS	missed	LS	missed	missed	missed	missed	missed	missed	LS	missed	LS	0	4	LS
850	Chr1	8540000	8550000	Core	missed	missed	missed	missed	missed	LS	LS	LS	missed	LS	missed	LS	missed	missed	missed	0	5	LS
864	Chr1	8680000	8690000	Core	missed	missed	LS	missed	missed	missed	missed	missed	missed	missed	LS	missed	LS	missed	LS	0	4	LS
866	Chr1	8700000	8710000	Core	missed	LS	LS	missed	missed	missed	LS	missed	LS	missed	missed	missed	missed	missed	missed	0	4	LS
867	Chr1	8710000	8720000	Core	missed	LS	Core	missed	missed	missed	missed	missed	missed	missed	LS	missed	missed	missed	missed	1	2	LS
870	Chr1	8740000	8750000	Core	missed	missed	missed	missed	missed	missed	missed	missed	missed	missed	missed	LS	missed	missed	missed	0	1	LS
874	Chr1	8780000	8790000	Core	missed	Core	missed	missed	missed	missed	LS	missed	LS	missed	missed	missed	missed	missed	missed	1	2	LS
885	Chr1	8890000	8900000	Core	Core	missed	missed	LS	missed	missed	missed	LS	missed	LS	LS	missed	missed	missed	Core	2	4	LS
886	Chr1	8900000	8910000	Core	missed	LS	missed	missed	missed	missed	missed	missed	missed	missed	missed	missed	missed	missed	missed	0	1	LS
892	Chr1	8960000	8970000	Core	missed	missed	LS	Core	missed	missed	LS	missed	Core	Core	missed	LS	missed	LS	missed	3	4	LS
895	Chr1	8990000	9000000	Core	LS	LS	missed	missed	LS	missed	missed	missed	missed	LS	missed	LS	missed	LS	missed	0	6	LS
898	Chr1	9020000	9030000	Core	missed	missed	missed	missed	missed	missed	missed	LS	missed	missed	missed	LS	missed	missed	LS	0	3	LS
901	Chr1	9050000	9060000	Core	missed	missed	missed	LS	missed	LS	missed	missed	missed	missed	missed	missed	missed	missed	missed	0	2	LS
914	Chr1	9180000	9190000	Core	missed	missed	missed	missed	LS	missed	LS	missed	missed	missed	missed	missed	missed	missed	missed	0	2	LS
921	Chr1	9250000	9260000	Core	missed	missed	missed	missed	missed	LS	missed	missed	missed	missed	missed	missed	missed	missed	LS	0	2	LS
922	Chr1	9260000	9270000	Core	LS	missed	missed	LS	missed	missed	missed	missed	LS	missed	missed	missed	LS	missed	LS	0	5	LS
924	Chr2	0	10000	Core	missed	missed	missed	missed	missed	missed	missed	missed	LS	LS	LS	missed	missed	missed	missed	0	3	LS
935	Chr2	110000	120000	Core	LS	missed	missed	missed	missed	missed	missed	missed	missed	missed	missed	LS	missed	missed	LS	0	3	LS
936	Chr2	120000	130000	Core	missed	missed	missed	missed	missed	missed	missed	LS	missed	missed	missed	missed	missed	LS	missed	0	2	LS
937	Chr2	130000	140000	Core	missed	missed	LS	missed	missed	missed	LS	missed	missed	missed	missed	missed	missed	missed	missed	0	2	LS
938	Chr2	140000	150000	Core	missed	missed	missed	missed	missed	missed	missed	missed	missed	LS	missed	LS	missed	missed	missed	0	2	LS
943	Chr2	190000	200000	Core	missed	missed	missed	LS	missed	missed	LS	missed	missed	missed	LS	LS	missed	missed	missed	0	4	LS
958	Chr2	340000	350000	Core	missed	LS	missed	LS	missed	LS	missed	missed	missed	missed	LS	missed	missed	missed	missed	0	4	LS
973	Chr2	490000	500000	Core	missed	missed	missed	missed	missed	missed	missed	missed	LS	missed	missed	missed	missed	LS	missed	0	2	LS
1032	Chr2	1080000	1090000	Core	missed	missed	missed	LS	missed	Core	LS	missed	LS	LS	missed	missed	Core	missed	LS	2	5	LS
1049	Chr2	1250000	1260000	Core	missed	LS	missed	missed	missed	missed	missed	missed	missed	LS	missed	LS	missed	LS	missed	0	4	LS
1056	Chr2	1320000	1330000	Core	missed	missed	LS	missed	missed	missed	missed	LS	missed	LS	missed	LS	missed	LS	LS	0	6	LS
1057	Chr2	1330000	1340000	Core	missed	Core	missed	missed	missed	missed	missed	LS	missed	missed	missed	missed	missed	LS	missed	1	2	LS
1058	Chr2	1340000	1350000	Core	missed	missed	missed	missed	LS	missed	missed	missed	missed	missed	Core	missed	missed	missed	LS	1	2	LS
1066	Chr2	1420000	1430000	Core	missed	LS	missed	missed	missed	missed	LS	missed	LS	missed	missed	missed	missed	missed	missed	0	3	LS
1072	Chr2	1480000	1490000	Core	LS	LS	missed	LS	LS	missed	missed	missed	missed	missed	missed	missed	LS	missed	LS	0	6	LS
1138	Chr2	2140000	2150000	Core	LS	missed	missed	missed	missed	missed	missed	missed	LS	missed	missed	missed	missed	missed	missed	0	2	LS
1143	Chr2	2190000	2200000	Core	LS	missed	missed	missed	missed	missed	LS	missed	missed	missed	missed	LS	missed	LS	missed	0	4	LS
1179	Chr2	2550000	2560000	Core	missed	missed	missed	missed	missed	missed	missed	LS	missed	missed	missed	missed	LS	missed	missed	0	2	LS
1180	Chr2	2560000	2570000	Core	missed	LS	missed	missed	missed	missed	missed	missed	missed	missed	LS	missed	LS	missed	missed	0	3	LS
1192	Chr2	2680000	2690000	Core	missed	missed	missed	missed	missed	missed	missed	missed	missed	missed	missed	LS	missed	missed	missed	0	1	LS
1204	Chr2	2800000	2810000	Core	LS	missed	missed	missed	missed	missed	missed	LS	missed	LS	LS	missed	missed	missed	missed	0	4	LS
1205	Chr2	2810000	2820000	Core	missed	missed	missed	missed	missed	missed	missed	missed	missed	missed	missed	missed	missed	missed	LS	0	1	LS
1206	Chr2	2820000	2830000	Core	missed	missed	missed	LS	LS	missed	missed	missed	missed	LS	missed	missed	missed	missed	missed	0	3	LS
1212	Chr2	2880000	2890000	LS	missed	missed	missed	missed	missed	missed	missed	LS	missed	missed	missed	missed	missed	missed	LS	0	2	LS
1213	Chr2	2890000	2900000	LS	missed	LS	missed	missed	missed	missed	missed	missed	missed	missed	missed	missed	missed	missed	missed	0	1	LS
1214	Chr2	2900000	2910000	LS	LS	missed	missed	missed	missed	missed	missed	missed	missed	missed	missed	missed	LS	missed	LS	0	3	LS
1215	Chr2	2910000	2920000	LS	missed	missed	LS	missed	missed	missed	LS	missed	missed	missed	missed	missed	missed	missed	missed	0	2	LS
1216	Chr2	2920000	2930000	LS	missed	LS	missed	LS	missed	missed	missed	missed	LS	missed	missed	LS	LS	missed	missed	0	5	LS
1217	Chr2	2930000	2940000	LS	missed	missed	missed	missed	missed	missed	LS	missed	missed	LS	missed	missed	missed	missed	missed	0	2	LS
1218	Chr2	2940000	2950000	LS	missed	missed	missed	missed	missed	missed	missed	missed	missed	missed	missed	missed	missed	LS	missed	0	1	LS
1219	Chr2	2950000	2960000	LS	missed	missed	LS	missed	LS	missed	missed	missed	LS	missed	LS	missed	missed	missed	LS	0	5	LS
1220	Chr2	2960000	2970000	LS	missed	missed	missed	LS	missed	missed	missed	missed	missed	missed	missed	LS	missed	missed	missed	0	2	LS
1221	Chr2	2970000	2980000	LS	missed	missed	missed	LS	missed	missed	LS	missed	missed	missed	Core	missed	missed	missed	LS	1	3	LS
1222	Chr2	2980000	2990000	LS	LS	LS	missed	missed	LS	missed	missed	missed	missed	missed	missed	missed	LS	missed	missed	0	4	LS
1223	Chr2	2990000	3000000	LS	missed	missed	LS	missed	missed	missed	missed	missed	missed	LS	missed	missed	missed	missed	missed	0	2	LS
1224	Chr2	3000000	3010000	LS	LS	missed	missed	missed	LS	missed	missed	missed	missed	missed	missed	missed	missed	Core	missed	1	2	LS
1227	Chr2	3030000	3040000	Core	missed	missed	missed	LS	missed	missed	missed	missed	missed	missed	missed	missed	missed	missed	missed	0	1	LS
1236	Chr2	3120000	3130000	Core	LS	missed	missed	missed	missed	missed	missed	missed	missed	missed	missed	missed	missed	LS	LS	0	3	LS
1237	Chr2	3130000	3140000	Core	missed	missed	missed	missed	missed	LS	missed	missed	missed	missed	LS	missed	missed	missed	missed	0	2	LS
1238	Chr2	3140000	3150000	Core	LS	LS	missed	missed	missed	missed	missed	missed	missed	LS	missed	missed	missed	LS	missed	0	4	LS
1239	Chr2	3150000	3160000	Core	LS	missed	missed	missed	missed	missed	missed	LS	LS	missed	missed	missed	missed	missed	missed	0	3	LS
1240	Chr2	3160000	3170000	Core	LS	missed	missed	missed	missed	missed	missed	missed	missed	missed	missed	missed	LS	missed	missed	0	2	LS
1241	Chr2	3170000	3180000	Core	LS	missed	missed	missed	missed	missed	missed	missed	missed	LS	missed	missed	missed	missed	missed	0	2	LS
1242	Chr2	3180000	3190000	Core	missed	missed	missed	missed	missed	missed	LS	LS	missed	missed	LS	missed	missed	missed	missed	0	3	LS
1243	Chr2	3190000	3200000	LS	missed	missed	missed	LS	missed	LS	LS	missed	missed	missed	missed	missed	LS	missed	missed	0	4	LS
1244	Chr2	3200000	3210000	LS	LS	missed	missed	missed	missed	missed	missed	missed	missed	missed	missed	missed	missed	LS	missed	0	2	LS
1245	Chr2	3210000	3220000	LS	missed	missed	missed	LS	missed	LS	missed	missed	missed	LS	missed	missed	missed	missed	missed	0	3	LS
1246	Chr2	3220000	3230000	LS	LS	missed	missed	missed	missed	missed	missed	missed	missed	missed	missed	missed	missed	LS	missed	0	2	LS
1247	Chr2	3230000	3240000	LS	missed	missed	missed	missed	missed	missed	missed	missed	LS	LS	missed	missed	missed	LS	missed	0	3	LS
1248	Chr2	3240000	3250000	LS	LS	missed	missed	missed	missed	missed	missed	LS	missed	missed	missed	missed	missed	missed	missed	0	2	LS
1249	Chr2	3250000	3260000	LS	missed	missed	missed	missed	missed	LS	missed	LS	missed	missed	missed	LS	missed	missed	missed	0	3	LS
1250	Chr2	3260000	3270000	LS	missed	missed	LS	missed	missed	missed	missed	missed	missed	missed	missed	missed	missed	missed	LS	0	2	LS
1251	Chr2	3270000	3280000	LS	missed	missed	LS	missed	missed	missed	missed	LS	missed	missed	missed	LS	missed	missed	missed	0	3	LS
1252	Chr2	3280000	3290000	LS	missed	LS	missed	missed	missed	missed	missed	missed	missed	LS	missed	missed	missed	LS	missed	0	3	LS
1253	Chr2	3290000	3300000	LS	missed	missed	LS	missed	missed	missed	missed	missed	missed	missed	missed	missed	missed	missed	missed	0	1	LS
1254	Chr2	3300000	3310000	LS	LS	LS	missed	missed	missed	LS	missed	missed	missed	LS	LS	missed	missed	missed	missed	0	5	LS
1255	Chr2	3310000	3320000	LS	missed	LS	missed	missed	missed	missed	LS	missed	missed	missed	missed	missed	missed	missed	missed	0	2	LS
1256	Chr2	3320000	3330000	LS	missed	missed	missed	missed	missed	missed	missed	LS	missed	missed	LS	missed	missed	missed	missed	0	2	LS
1257	Chr2	3330000	3340000	LS	LS	LS	missed	LS	LS	LS	LS	missed	missed	missed	LS	missed	missed	missed	missed	0	7	LS
1258	Chr2	3340000	3350000	LS	LS	missed	LS	LS	LS	LS	LS	missed	missed	missed	missed	LS	LS	LS	LS	0	10	LS
1259	Chr2	3350000	3360000	LS	missed	missed	missed	missed	missed	LS	LS	LS	missed	missed	missed	missed	LS	LS	missed	0	5	LS
1260	Chr2	3360000	3370000	LS	missed	LS	LS	missed	missed	LS	LS	missed	missed	missed	missed	missed	LS	LS	missed	0	6	LS
1262	Chr2	3380000	3390000	LS	missed	missed	LS	missed	missed	missed	missed	missed	missed	missed	missed	missed	LS	missed	missed	0	2	LS
1263	Chr2	3390000	3400000	LS	LS	missed	missed	missed	missed	missed	missed	missed	missed	LS	missed	LS	missed	missed	missed	0	3	LS
1265	Chr2	3410000	3420000	LS	missed	LS	missed	missed	missed	missed	missed	LS	LS	missed	missed	LS	missed	LS	missed	0	5	LS
1267	Chr2	3430000	3440000	LS	missed	missed	LS	missed	LS	missed	missed	missed	missed	missed	missed	missed	missed	missed	missed	0	2	LS
1268	Chr2	3440000	3450000	LS	missed	missed	LS	missed	missed	missed	missed	missed	missed	missed	missed	missed	missed	LS	Core	1	2	LS
1269	Chr2	3450000	3460000	LS	missed	LS	missed	missed	missed	missed	missed	missed	missed	missed	missed	LS	LS	missed	missed	0	3	LS
1270	Chr2	3480000	3490000	LS	missed	LS	missed	missed	missed	missed	missed	missed	LS	missed	missed	missed	missed	LS	missed	0	3	LS
1272	Chr2	3500000	3510000	LS	missed	missed	missed	missed	missed	LS	missed	missed	missed	missed	LS	missed	missed	missed	missed	0	2	LS
1273	Chr2	3510000	3520000	LS	LS	missed	missed	missed	missed	LS	missed	missed	missed	missed	LS	missed	LS	missed	missed	0	4	LS
1275	Chr2	3530000	3540000	LS	missed	missed	missed	missed	missed	missed	missed	missed	LS	missed	LS	missed	LS	missed	missed	0	3	LS
1276	Chr2	3540000	3550000	LS	missed	LS	missed	missed	missed	missed	LS	missed	missed	missed	missed	missed	missed	missed	LS	0	3	LS
1277	Chr2	3550000	3560000	LS	LS	LS	missed	missed	missed	missed	missed	missed	missed	missed	LS	missed	missed	LS	missed	0	4	LS
1278	Chr2	3560000	3570000	LS	missed	missed	missed	missed	missed	missed	missed	missed	LS	missed	missed	missed	LS	missed	missed	0	2	LS
1281	Chr2	3590000	3600000	LS	missed	missed	missed	LS	missed	LS	missed	LS	missed	LS	missed	missed	missed	missed	missed	0	4	LS
1282	Chr2	3600000	3610000	LS	missed	missed	missed	missed	missed	missed	missed	missed	missed	missed	missed	missed	missed	missed	LS	0	1	LS
1283	Chr2	3610000	3620000	LS	missed	missed	missed	missed	missed	missed	missed	missed	LS	missed	missed	missed	missed	missed	missed	0	1	LS
1291	Chr2	3690000	3700000	Core	LS	missed	missed	LS	missed	Core	missed	missed	missed	missed	missed	Core	missed	LS	missed	2	3	LS
1304	Chr2	3820000	3830000	Core	missed	missed	missed	missed	missed	missed	missed	LS	LS	missed	missed	missed	missed	missed	missed	0	2	LS
1312	Chr2	3900000	3910000	Core	missed	missed	missed	missed	missed	missed	LS	missed	missed	missed	Core	LS	missed	missed	missed	1	2	LS
1313	Chr2	3910000	3920000	Core	missed	missed	LS	LS	missed	missed	missed	missed	LS	LS	missed	missed	missed	missed	LS	0	5	LS
1346	Chr2	4240000	4250000	Core	missed	missed	missed	missed	LS	LS	missed	missed	missed	missed	LS	missed	missed	missed	missed	0	3	LS
1348	Chr2	4260000	4270000	Core	missed	missed	missed	missed	missed	missed	missed	missed	LS	missed	missed	LS	missed	missed	Core	1	2	LS
1365	Chr3	160000	170000	Core	missed	missed	missed	missed	LS	missed	missed	missed	missed	missed	missed	missed	missed	missed	missed	0	1	LS
1371	Chr3	220000	230000	Core	missed	LS	missed	missed	missed	missed	missed	missed	missed	missed	LS	missed	missed	LS	missed	0	3	LS
1377	Chr3	280000	290000	Core	missed	missed	Core	missed	missed	missed	missed	missed	missed	missed	LS	missed	missed	LS	missed	1	2	LS
1378	Chr3	290000	300000	Core	missed	missed	Core	missed	LS	Core	LS	missed	Core	missed	LS	missed	missed	LS	missed	3	4	LS
1382	Chr3	330000	340000	Core	missed	missed	LS	missed	missed	missed	missed	missed	LS	missed	missed	missed	LS	missed	missed	0	3	LS
1383	Chr3	340000	350000	Core	missed	missed	missed	missed	missed	missed	missed	missed	missed	LS	missed	missed	missed	missed	missed	0	1	LS
1384	Chr3	350000	360000	Core	missed	LS	missed	missed	missed	missed	missed	missed	missed	LS	missed	missed	LS	LS	missed	0	4	LS
1565	Chr3	2160000	2170000	Core	missed	missed	missed	missed	missed	LS	LS	missed	missed	missed	missed	missed	missed	Core	missed	1	2	LS
1634	Chr3	2850000	2860000	Core	missed	LS	LS	missed	missed	missed	missed	LS	missed	missed	LS	missed	missed	missed	missed	0	4	LS
1684	Chr3	3350000	3360000	Core	missed	missed	missed	missed	missed	missed	missed	missed	LS	missed	missed	missed	LS	LS	missed	0	3	LS
1724	Chr3	3750000	3760000	Core	LS	missed	missed	missed	LS	missed	missed	missed	missed	missed	missed	LS	missed	LS	missed	0	4	LS
1727	Chr3	3780000	3790000	Core	missed	missed	missed	missed	missed	missed	LS	Core	LS	missed	missed	missed	LS	missed	missed	1	3	LS
1730	Chr3	3810000	3820000	Core	LS	missed	LS	missed	missed	Core	missed	LS	missed	missed	LS	missed	missed	missed	missed	1	4	LS
1735	Chr3	3860000	3870000	Core	LS	missed	missed	missed	LS	missed	missed	missed	missed	missed	missed	missed	missed	missed	missed	0	2	LS
1740	Chr3	3910000	3920000	Core	missed	LS	missed	LS	missed	LS	missed	LS	missed	LS	LS	missed	missed	missed	missed	0	6	LS
1764	Chr3	4150000	4160000	Core	missed	LS	LS	LS	missed	missed	LS	missed	missed	missed	missed	missed	missed	LS	missed	0	5	LS
1765	Chr3	4160000	4168633	Core	missed	missed	missed	missed	missed	missed	missed	missed	missed	missed	LS	missed	missed	missed	missed	0	1	LS
1766	Chr4	0	10000	Core	missed	missed	missed	missed	missed	missed	missed	missed	missed	missed	missed	missed	missed	missed	LS	0	1	LS
1794	Chr4	280000	290000	Core	missed	missed	missed	LS	missed	missed	missed	missed	missed	missed	missed	missed	missed	missed	missed	0	1	LS
1795	Chr4	290000	300000	Core	missed	missed	missed	LS	LS	missed	missed	missed	missed	missed	missed	missed	missed	missed	missed	0	2	LS
1824	Chr4	580000	590000	Core	LS	missed	LS	missed	missed	LS	missed	missed	missed	missed	missed	missed	missed	missed	missed	0	3	LS
1849	Chr4	830000	840000	Core	LS	missed	missed	missed	missed	missed	LS	missed	LS	missed	missed	missed	LS	missed	LS	0	5	LS
1854	Chr4	880000	890000	Core	missed	missed	missed	missed	missed	missed	missed	missed	missed	missed	missed	LS	missed	missed	missed	0	1	LS
1859	Chr4	930000	940000	Core	missed	missed	missed	missed	missed	missed	LS	LS	missed	missed	missed	LS	missed	missed	missed	0	3	LS
1860	Chr4	940000	950000	Core	missed	missed	missed	missed	LS	LS	missed	missed	missed	LS	missed	missed	missed	missed	missed	0	3	LS
1861	Chr4	950000	960000	Core	missed	missed	missed	LS	missed	missed	missed	missed	missed	missed	missed	missed	LS	missed	LS	0	3	LS
1862	Chr4	960000	970000	Core	missed	LS	missed	missed	LS	missed	LS	missed	missed	missed	LS	missed	missed	missed	missed	0	4	LS
1863	Chr4	970000	980000	Core	missed	missed	missed	missed	missed	missed	missed	missed	missed	LS	LS	missed	missed	missed	LS	0	3	LS
1864	Chr4	980000	990000	Core	missed	missed	missed	missed	missed	missed	LS	LS	missed	LS	missed	missed	missed	missed	missed	0	3	LS
1868	Chr4	1020000	1030000	Core	missed	missed	missed	LS	missed	missed	missed	missed	LS	missed	missed	missed	LS	LS	LS	0	5	LS
1869	Chr4	1030000	1040000	Core	LS	LS	missed	LS	missed	missed	missed	missed	missed	LS	missed	missed	missed	missed	missed	0	4	LS
1870	Chr4	1040000	1050000	LS	missed	missed	missed	missed	LS	missed	missed	missed	missed	missed	LS	missed	missed	missed	missed	0	2	LS
1871	Chr4	1050000	1060000	LS	missed	missed	missed	missed	missed	LS	missed	missed	missed	missed	LS	missed	missed	LS	missed	0	3	LS
1872	Chr4	1060000	1070000	LS	LS	missed	missed	LS	missed	missed	missed	LS	missed	missed	LS	missed	missed	missed	LS	0	5	LS
1873	Chr4	1070000	1080000	LS	missed	LS	missed	missed	missed	missed	LS	missed	missed	missed	missed	missed	missed	missed	missed	0	2	LS
1874	Chr4	1080000	1090000	LS	missed	missed	missed	missed	LS	Core	LS	missed	missed	missed	missed	missed	missed	missed	missed	1	2	LS
1876	Chr4	1100000	1110000	LS	missed	LS	missed	missed	LS	missed	missed	missed	LS	missed	missed	missed	LS	missed	LS	0	5	LS
1877	Chr4	1110000	1120000	LS	missed	missed	LS	LS	LS	missed	missed	missed	missed	missed	missed	LS	missed	missed	missed	0	4	LS
1878	Chr4	1120000	1130000	LS	missed	missed	missed	missed	missed	missed	missed	LS	missed	missed	LS	missed	missed	missed	missed	0	2	LS
1879	Chr4	1130000	1140000	LS	missed	LS	missed	missed	missed	missed	missed	missed	missed	missed	missed	LS	LS	LS	missed	0	4	LS
1880	Chr4	1140000	1150000	LS	LS	missed	missed	missed	missed	missed	missed	missed	missed	missed	missed	missed	missed	missed	missed	0	1	LS
1881	Chr4	1150000	1160000	LS	missed	missed	missed	missed	missed	missed	missed	missed	missed	missed	missed	LS	missed	missed	missed	0	1	LS
1882	Chr4	1160000	1170000	LS	missed	missed	missed	missed	missed	missed	missed	missed	missed	LS	missed	missed	missed	missed	missed	0	1	LS
1883	Chr4	1170000	1180000	LS	missed	missed	missed	missed	missed	missed	missed	LS	missed	LS	missed	missed	missed	missed	missed	0	2	LS
1884	Chr4	1180000	1190000	LS	LS	LS	missed	missed	missed	missed	missed	missed	missed	missed	LS	missed	missed	missed	missed	0	3	LS
1885	Chr4	1190000	1200000	LS	missed	missed	missed	missed	missed	missed	missed	LS	missed	LS	missed	missed	missed	missed	missed	0	2	LS
1886	Chr4	1200000	1210000	LS	missed	missed	LS	missed	LS	LS	LS	missed	LS	LS	missed	missed	missed	missed	LS	0	7	LS
1889	Chr4	1230000	1240000	LS	missed	missed	missed	missed	missed	missed	missed	LS	LS	missed	missed	missed	missed	missed	missed	0	2	LS
1891	Chr4	1250000	1260000	LS	missed	LS	LS	missed	missed	LS	missed	missed	missed	LS	missed	missed	missed	missed	missed	0	4	LS
1894	Chr4	1280000	1290000	LS	LS	missed	missed	LS	missed	missed	missed	missed	missed	missed	missed	missed	missed	missed	missed	0	2	LS
1895	Chr4	1290000	1300000	LS	missed	missed	missed	missed	missed	missed	missed	missed	missed	LS	missed	missed	missed	missed	missed	0	1	LS
1897	Chr4	1310000	1320000	LS	missed	missed	missed	missed	missed	missed	missed	missed	missed	missed	LS	missed	missed	missed	missed	0	1	LS
1898	Chr4	1320000	1330000	LS	LS	missed	missed	LS	missed	Core	missed	missed	missed	missed	missed	missed	missed	missed	LS	1	3	LS
1899	Chr4	1330000	1340000	LS	LS	missed	missed	missed	LS	missed	missed	LS	missed	LS	missed	LS	missed	missed	LS	0	6	LS
1900	Chr4	1340000	1350000	LS	missed	missed	missed	missed	LS	missed	LS	missed	missed	missed	missed	missed	LS	missed	missed	0	3	LS
1901	Chr4	1350000	1360000	LS	missed	missed	missed	missed	LS	missed	missed	missed	missed	missed	missed	missed	missed	missed	LS	0	2	LS
1902	Chr4	1360000	1370000	LS	missed	missed	LS	LS	LS	missed	LS	LS	missed	missed	LS	missed	missed	LS	missed	0	7	LS
1903	Chr4	1370000	1380000	LS	missed	missed	missed	missed	LS	missed	missed	missed	missed	missed	missed	missed	LS	missed	LS	0	3	LS
1904	Chr4	1380000	1390000	LS	LS	missed	missed	missed	missed	missed	missed	LS	missed	missed	missed	missed	missed	LS	missed	0	3	LS
1905	Chr4	1390000	1400000	LS	missed	missed	missed	missed	LS	missed	LS	missed	missed	missed	missed	missed	missed	missed	LS	0	3	LS
1906	Chr4	1400000	1410000	LS	missed	missed	missed	missed	missed	missed	LS	missed	LS	missed	missed	missed	LS	missed	LS	0	4	LS
1907	Chr4	1410000	1420000	LS	missed	LS	missed	missed	missed	LS	LS	missed	missed	LS	missed	missed	missed	missed	LS	0	5	LS
1908	Chr4	1420000	1430000	LS	missed	missed	missed	missed	missed	missed	missed	LS	missed	LS	LS	missed	LS	missed	missed	0	4	LS
1909	Chr4	1430000	1440000	LS	missed	missed	missed	missed	missed	missed	LS	missed	LS	LS	missed	LS	LS	missed	LS	0	6	LS
1910	Chr4	1440000	1450000	LS	missed	missed	missed	missed	missed	missed	missed	missed	missed	LS	missed	missed	missed	LS	missed	0	2	LS
1911	Chr4	1450000	1460000	LS	missed	missed	LS	missed	missed	LS	LS	missed	missed	missed	missed	missed	missed	LS	missed	0	4	LS
1912	Chr4	1460000	1470000	LS	missed	LS	missed	missed	missed	missed	missed	LS	missed	missed	missed	missed	missed	missed	missed	0	2	LS
1913	Chr4	1470000	1480000	LS	missed	missed	LS	missed	missed	missed	missed	LS	LS	missed	missed	missed	missed	missed	missed	0	3	LS
1917	Chr4	1510000	1520000	Core	missed	missed	missed	missed	missed	missed	missed	LS	missed	missed	missed	missed	LS	LS	missed	0	3	LS
1919	Chr4	1530000	1540000	Core	missed	missed	missed	missed	missed	missed	missed	missed	missed	missed	LS	missed	missed	LS	missed	0	2	LS
1926	Chr4	1600000	1610000	Core	missed	missed	missed	LS	missed	missed	missed	missed	LS	LS	missed	missed	missed	missed	missed	0	3	LS
1964	Chr4	1980000	1990000	Core	missed	missed	missed	missed	missed	missed	missed	missed	missed	missed	missed	missed	missed	LS	missed	0	1	LS
1997	Chr4	2310000	2320000	Core	missed	LS	missed	missed	LS	missed	missed	missed	missed	missed	missed	missed	missed	missed	LS	0	3	LS
2092	Chr4	3260000	3270000	Core	LS	missed	missed	LS	missed	missed	missed	missed	missed	missed	missed	missed	missed	missed	missed	0	2	LS
2098	Chr4	3320000	3330000	Core	missed	LS	missed	missed	LS	missed	missed	missed	missed	missed	missed	missed	missed	missed	missed	0	2	LS
2099	Chr4	3330000	3340000	Core	missed	missed	missed	missed	missed	LS	missed	LS	LS	missed	missed	missed	missed	missed	missed	0	3	LS
2101	Chr4	3350000	3360000	LS	missed	LS	missed	missed	missed	missed	missed	missed	missed	missed	missed	missed	LS	missed	missed	0	2	LS
2104	Chr4	3380000	3390000	Core	missed	missed	missed	missed	missed	missed	missed	LS	missed	Core	LS	missed	LS	missed	missed	1	3	LS
2106	Chr4	3400000	3410000	Core	missed	missed	missed	missed	missed	missed	missed	missed	missed	LS	missed	LS	missed	missed	missed	0	2	LS
2110	Chr4	3440000	3450000	Core	missed	missed	LS	LS	missed	missed	missed	missed	missed	missed	missed	missed	missed	missed	missed	0	2	LS
2111	Chr4	3450000	3460000	Core	missed	LS	missed	missed	LS	LS	missed	missed	LS	missed	missed	missed	missed	missed	missed	0	4	LS
2120	Chr4	3540000	3550000	Core	missed	missed	LS	missed	missed	missed	LS	missed	missed	missed	LS	missed	missed	missed	missed	0	3	LS
2121	Chr4	3550000	3560000	Core	LS	missed	missed	missed	missed	missed	LS	missed	missed	missed	missed	missed	missed	LS	missed	0	3	LS
2123	Chr4	3570000	3580000	Core	missed	missed	missed	missed	missed	missed	LS	LS	missed	missed	missed	missed	missed	missed	LS	0	3	LS
2124	Chr4	3580000	3590000	Core	missed	missed	missed	missed	missed	LS	missed	Core	missed	missed	LS	missed	missed	missed	missed	1	2	LS
2129	Chr4	3630000	3640000	Core	missed	LS	missed	missed	missed	missed	missed	missed	missed	missed	missed	missed	LS	missed	missed	0	2	LS
2131	Chr4	3650000	3660000	Core	missed	LS	LS	Core	missed	missed	missed	LS	missed	LS	missed	missed	missed	missed	missed	1	4	LS
2132	Chr4	3660000	3670000	Core	missed	missed	missed	LS	missed	missed	LS	LS	missed	LS	missed	LS	missed	missed	missed	0	5	LS
2134	Chr4	3680000	3690000	Core	missed	LS	Core	LS	LS	missed	missed	missed	missed	missed	missed	LS	missed	missed	missed	1	4	LS
2136	Chr4	3700000	3710000	Core	missed	LS	missed	missed	missed	missed	missed	missed	LS	missed	missed	missed	missed	missed	missed	0	2	LS
2142	Chr4	3760000	3770000	Core	missed	missed	LS	missed	missed	missed	missed	missed	missed	missed	missed	missed	missed	missed	LS	0	2	LS
2143	Chr4	3770000	3780000	Core	missed	missed	missed	missed	missed	missed	missed	LS	missed	missed	missed	missed	LS	missed	missed	0	2	LS
2144	Chr4	3780000	3790000	Core	LS	missed	missed	missed	missed	missed	missed	missed	missed	missed	missed	missed	missed	missed	missed	0	1	LS
2162	Chr4	3960000	3970000	Core	missed	missed	LS	missed	missed	missed	missed	LS	missed	missed	missed	LS	LS	missed	missed	0	4	LS
2166	Chr4	4000000	4010000	Core	missed	missed	missed	missed	missed	missed	missed	missed	LS	missed	missed	LS	missed	missed	missed	0	2	LS
2169	Chr4	4030000	4040000	Core	missed	missed	missed	missed	missed	missed	missed	LS	missed	LS	missed	LS	missed	missed	missed	0	3	LS
2170	Chr4	4040000	4050000	Core	LS	missed	missed	LS	LS	missed	LS	missed	missed	LS	missed	Core	missed	missed	missed	1	5	LS
2171	Chr4	4050000	4060000	Core	missed	missed	missed	LS	missed	missed	LS	missed	LS	missed	missed	missed	LS	missed	missed	0	4	LS
2172	Chr4	4060000	4070000	Core	LS	missed	LS	missed	missed	missed	missed	missed	missed	missed	missed	missed	missed	missed	missed	0	2	LS
2173	Chr4	4070000	4080000	Core	missed	missed	missed	missed	missed	missed	LS	missed	missed	missed	missed	missed	LS	LS	missed	0	3	LS
2175	Chr5	0	10000	Core	missed	missed	missed	missed	missed	missed	missed	missed	missed	missed	LS	LS	missed	missed	LS	0	3	LS
2176	Chr5	10000	20000	Core	missed	missed	missed	missed	missed	missed	missed	missed	LS	missed	missed	LS	missed	missed	LS	0	3	LS
2177	Chr5	20000	30000	Core	LS	missed	missed	missed	missed	missed	missed	missed	LS	missed	LS	missed	LS	LS	missed	0	5	LS
2178	Chr5	30000	40000	Core	missed	LS	LS	missed	missed	missed	missed	missed	LS	LS	LS	missed	missed	missed	missed	0	5	LS
2180	Chr5	50000	60000	Core	missed	missed	missed	LS	LS	missed	missed	missed	missed	missed	missed	Core	LS	Core	missed	2	3	LS
2182	Chr5	70000	80000	Core	missed	missed	missed	missed	missed	Core	missed	missed	LS	missed	missed	LS	missed	missed	missed	1	2	LS
2222	Chr5	470000	480000	Core	LS	LS	missed	missed	missed	missed	missed	missed	missed	missed	missed	missed	missed	missed	LS	0	3	LS
2223	Chr5	480000	490000	Core	missed	missed	missed	missed	LS	Core	missed	LS	missed	missed	missed	missed	missed	missed	missed	1	2	LS
2230	Chr5	550000	560000	Core	missed	missed	LS	missed	LS	missed	missed	missed	missed	missed	LS	missed	missed	missed	missed	0	3	LS
2232	Chr5	570000	580000	Core	missed	LS	missed	missed	missed	missed	missed	missed	missed	missed	missed	missed	missed	LS	LS	0	3	LS
2233	Chr5	580000	590000	Core	missed	missed	missed	missed	missed	LS	missed	missed	missed	missed	missed	missed	LS	missed	LS	0	3	LS
2234	Chr5	590000	600000	Core	LS	missed	missed	missed	missed	missed	missed	LS	missed	missed	LS	LS	missed	missed	missed	0	4	LS
2235	Chr5	600000	610000	Core	missed	missed	missed	missed	missed	missed	missed	LS	missed	LS	missed	missed	missed	missed	missed	0	2	LS
2236	Chr5	610000	620000	Core	missed	missed	missed	missed	missed	LS	missed	missed	missed	LS	missed	missed	missed	missed	missed	0	2	LS
2237	Chr5	620000	630000	LS	missed	missed	LS	missed	missed	missed	missed	missed	missed	missed	LS	missed	missed	missed	missed	0	2	LS
2238	Chr5	630000	640000	LS	missed	missed	missed	LS	missed	missed	LS	missed	missed	missed	missed	missed	missed	missed	missed	0	2	LS
2239	Chr5	640000	650000	LS	LS	missed	missed	LS	missed	missed	missed	missed	missed	missed	LS	LS	missed	LS	LS	0	6	LS
2240	Chr5	650000	660000	LS	missed	missed	missed	missed	LS	missed	missed	missed	missed	LS	missed	missed	missed	missed	LS	0	3	LS
2241	Chr5	660000	670000	LS	missed	missed	missed	missed	missed	missed	missed	missed	missed	LS	missed	missed	missed	missed	missed	0	1	LS
2242	Chr5	670000	680000	LS	missed	missed	missed	LS	missed	missed	missed	missed	missed	missed	missed	missed	missed	missed	missed	0	1	LS
2243	Chr5	680000	690000	LS	missed	missed	missed	LS	missed	missed	LS	missed	missed	missed	missed	missed	missed	missed	missed	0	2	LS
2244	Chr5	690000	700000	LS	LS	LS	Core	missed	LS	Core	LS	missed	LS	missed	missed	missed	missed	missed	missed	2	5	LS
2245	Chr5	700000	710000	LS	missed	missed	missed	missed	LS	missed	missed	missed	LS	missed	missed	missed	missed	missed	missed	0	2	LS
2246	Chr5	710000	720000	LS	missed	missed	missed	missed	missed	missed	LS	missed	missed	missed	missed	LS	missed	missed	missed	0	2	LS
2247	Chr5	720000	730000	LS	missed	missed	missed	missed	missed	missed	missed	missed	LS	missed	missed	missed	missed	missed	missed	0	1	LS
2248	Chr5	730000	740000	LS	missed	LS	missed	missed	missed	missed	missed	missed	missed	missed	missed	missed	LS	LS	missed	0	3	LS
2249	Chr5	740000	750000	LS	missed	missed	LS	LS	missed	missed	missed	missed	missed	missed	missed	missed	missed	missed	missed	0	2	LS
2250	Chr5	750000	760000	LS	missed	missed	missed	LS	missed	LS	missed	LS	LS	missed	missed	missed	missed	missed	missed	0	4	LS
2251	Chr5	760000	770000	LS	missed	missed	missed	missed	missed	missed	LS	LS	missed	missed	missed	missed	LS	missed	missed	0	3	LS
2252	Chr5	770000	780000	LS	LS	missed	LS	missed	missed	LS	missed	LS	missed	LS	missed	missed	missed	missed	missed	0	5	LS
2254	Chr5	790000	800000	LS	missed	missed	LS	missed	missed	LS	missed	missed	missed	missed	missed	LS	missed	LS	missed	0	4	LS
2255	Chr5	800000	810000	LS	LS	missed	missed	missed	missed	missed	missed	missed	LS	missed	missed	missed	LS	missed	missed	0	3	LS
2256	Chr5	810000	820000	LS	LS	LS	missed	missed	missed	missed	missed	missed	LS	missed	missed	missed	missed	missed	missed	0	3	LS
2257	Chr5	820000	830000	LS	missed	LS	missed	LS	LS	missed	missed	missed	missed	missed	missed	missed	missed	LS	missed	0	4	LS
2258	Chr5	830000	840000	LS	missed	missed	missed	LS	LS	missed	LS	missed	LS	missed	LS	missed	missed	missed	LS	0	6	LS
2259	Chr5	840000	850000	LS	missed	missed	missed	LS	missed	LS	LS	LS	missed	missed	missed	missed	missed	missed	missed	0	4	LS
2262	Chr5	870000	880000	LS	missed	LS	missed	missed	missed	LS	missed	missed	missed	LS	missed	missed	missed	LS	missed	0	4	LS
2265	Chr5	900000	910000	LS	missed	missed	LS	missed	missed	missed	missed	LS	missed	missed	LS	missed	missed	missed	missed	0	3	LS
2266	Chr5	910000	920000	LS	missed	LS	missed	missed	LS	missed	missed	missed	LS	missed	missed	LS	missed	missed	missed	0	4	LS
2267	Chr5	920000	930000	LS	missed	missed	missed	missed	missed	missed	missed	LS	missed	missed	missed	missed	missed	missed	missed	0	1	LS
2269	Chr5	940000	950000	LS	missed	missed	missed	LS	LS	missed	missed	missed	LS	missed	missed	LS	missed	missed	missed	0	4	LS
2270	Chr5	950000	960000	LS	missed	missed	missed	missed	missed	missed	missed	missed	missed	missed	LS	missed	LS	missed	missed	0	2	LS
2271	Chr5	960000	970000	LS	missed	missed	missed	missed	LS	missed	missed	missed	missed	LS	missed	missed	missed	missed	missed	0	2	LS
2272	Chr5	970000	980000	LS	missed	missed	LS	LS	missed	missed	missed	LS	missed	missed	missed	LS	LS	missed	missed	0	5	LS
2273	Chr5	980000	990000	LS	missed	LS	missed	LS	missed	LS	missed	missed	missed	missed	missed	missed	missed	missed	missed	0	3	LS
2274	Chr5	990000	1000000	LS	LS	missed	missed	missed	LS	missed	missed	missed	missed	missed	missed	LS	missed	missed	missed	0	3	LS
2276	Chr5	1010000	1020000	LS	missed	missed	missed	missed	LS	missed	missed	missed	missed	LS	missed	missed	missed	missed	missed	0	2	LS
2277	Chr5	1020000	1030000	LS	LS	missed	missed	LS	missed	missed	missed	missed	LS	missed	LS	LS	missed	missed	missed	0	5	LS
2279	Chr5	1040000	1050000	LS	missed	LS	missed	missed	LS	missed	missed	missed	missed	missed	missed	missed	missed	LS	missed	0	3	LS
2280	Chr5	1050000	1060000	LS	LS	missed	missed	missed	missed	LS	missed	missed	missed	missed	missed	missed	missed	missed	missed	0	2	LS
2300	Chr5	1250000	1260000	Core	missed	missed	missed	missed	missed	missed	LS	LS	LS	missed	missed	missed	missed	missed	missed	0	3	LS
2301	Chr5	1260000	1270000	Core	LS	missed	LS	missed	missed	missed	LS	LS	LS	missed	missed	LS	missed	missed	LS	0	7	LS
2306	Chr5	1310000	1320000	Core	missed	missed	missed	LS	missed	missed	LS	missed	missed	missed	missed	missed	missed	LS	missed	0	3	LS
2313	Chr5	1380000	1390000	Core	missed	missed	missed	missed	missed	missed	missed	missed	LS	missed	missed	missed	missed	missed	missed	0	1	LS
2323	Chr5	1480000	1490000	Core	missed	missed	missed	LS	missed	LS	missed	missed	LS	missed	missed	missed	missed	missed	missed	0	3	LS
2328	Chr5	1530000	1540000	Core	missed	missed	LS	LS	LS	missed	missed	missed	missed	missed	missed	missed	LS	missed	missed	0	4	LS
2432	Chr5	2570000	2580000	Core	missed	missed	missed	missed	missed	missed	missed	missed	LS	missed	missed	missed	LS	missed	missed	0	2	LS
2475	Chr5	3000000	3010000	Core	missed	missed	missed	missed	missed	missed	missed	missed	missed	missed	missed	LS	missed	LS	missed	0	2	LS
2491	Chr5	3160000	3170000	Core	missed	missed	missed	missed	missed	missed	missed	missed	missed	LS	missed	missed	missed	missed	missed	0	1	LS
2504	Chr5	3290000	3300000	Core	missed	missed	missed	LS	missed	missed	missed	missed	missed	LS	missed	Core	LS	missed	missed	1	3	LS
2513	Chr5	3380000	3390000	Core	LS	missed	missed	missed	missed	missed	missed	missed	missed	missed	missed	missed	missed	missed	missed	0	1	LS
2514	Chr5	3390000	3400000	Core	LS	missed	missed	LS	LS	LS	missed	missed	missed	LS	missed	missed	missed	missed	missed	0	5	LS
2515	Chr5	3400000	3410000	Core	LS	missed	missed	LS	missed	missed	missed	missed	missed	missed	LS	missed	missed	missed	missed	0	3	LS
2517	Chr5	3420000	3430000	Core	missed	missed	missed	missed	missed	missed	missed	missed	missed	missed	missed	LS	missed	LS	LS	0	3	LS
2518	Chr5	3430000	3440000	Core	missed	missed	missed	missed	LS	LS	LS	missed	missed	missed	LS	LS	missed	missed	missed	0	5	LS
2519	Chr5	3440000	3450000	Core	missed	missed	missed	missed	missed	missed	missed	missed	missed	missed	missed	missed	missed	LS	LS	0	2	LS
2520	Chr5	3450000	3460000	Core	missed	missed	missed	missed	missed	missed	LS	missed	missed	missed	LS	missed	missed	missed	missed	0	2	LS
2521	Chr5	3460000	3470000	Core	missed	LS	missed	missed	missed	missed	missed	missed	missed	missed	LS	missed	missed	missed	LS	0	3	LS
2522	Chr5	3470000	3480000	Core	missed	LS	LS	missed	missed	missed	missed	missed	missed	LS	missed	missed	missed	missed	LS	0	4	LS
2523	Chr5	3480000	3490000	Core	missed	missed	missed	missed	missed	missed	missed	missed	missed	missed	LS	missed	missed	missed	missed	0	1	LS
2524	Chr5	3490000	3500000	LS	missed	missed	missed	missed	missed	missed	LS	missed	missed	missed	missed	missed	missed	missed	missed	0	1	LS
2525	Chr5	3500000	3510000	LS	missed	missed	missed	missed	missed	missed	missed	missed	missed	missed	LS	LS	missed	missed	missed	0	2	LS
2526	Chr5	3510000	3520000	LS	missed	missed	missed	missed	missed	missed	missed	LS	LS	missed	missed	LS	missed	missed	missed	0	3	LS
2527	Chr5	3520000	3530000	LS	missed	missed	missed	LS	missed	LS	missed	missed	missed	missed	missed	missed	LS	missed	LS	0	4	LS
2528	Chr5	3530000	3540000	LS	LS	missed	missed	missed	missed	missed	missed	missed	missed	missed	missed	missed	LS	LS	missed	0	3	LS
2529	Chr5	3540000	3550000	LS	missed	missed	missed	missed	missed	missed	missed	missed	missed	missed	missed	missed	missed	missed	LS	0	1	LS
2530	Chr5	3550000	3560000	LS	missed	missed	missed	missed	missed	missed	missed	missed	missed	missed	LS	missed	missed	missed	missed	0	1	LS
2531	Chr5	3560000	3570000	LS	missed	missed	missed	missed	missed	missed	missed	missed	missed	missed	missed	missed	missed	missed	LS	0	1	LS
2533	Chr5	3580000	3590000	LS	missed	missed	missed	missed	missed	Core	missed	missed	LS	missed	missed	LS	missed	missed	missed	1	2	LS
2535	Chr5	3600000	3610000	LS	missed	missed	missed	missed	missed	missed	missed	missed	missed	missed	missed	LS	missed	missed	missed	0	1	LS
2536	Chr5	3610000	3620000	LS	missed	missed	missed	missed	missed	LS	missed	missed	missed	missed	LS	missed	missed	missed	LS	0	3	LS
2537	Chr5	3620000	3630000	LS	missed	missed	LS	missed	LS	missed	missed	missed	missed	missed	missed	missed	LS	LS	missed	0	4	LS
2540	Chr5	3650000	3660000	LS	missed	missed	missed	missed	missed	missed	missed	missed	missed	missed	missed	LS	missed	missed	missed	0	1	LS
2542	Chr5	3670000	3680000	LS	missed	missed	missed	LS	missed	missed	missed	LS	missed	missed	missed	missed	missed	LS	LS	0	4	LS
2543	Chr5	3680000	3690000	LS	missed	missed	LS	missed	missed	missed	LS	missed	missed	missed	missed	missed	missed	missed	LS	0	3	LS
2549	Chr5	3740000	3750000	Core	LS	missed	missed	missed	LS	missed	missed	missed	LS	missed	missed	missed	LS	missed	LS	0	5	LS
2550	Chr5	3750000	3760000	Core	LS	missed	missed	missed	missed	LS	missed	missed	missed	LS	missed	missed	missed	missed	LS	0	4	LS
2552	Chr5	3770000	3780000	Core	LS	missed	missed	LS	missed	missed	missed	missed	missed	missed	missed	missed	missed	missed	missed	0	2	LS
2568	Chr5	3930000	3940000	Core	missed	missed	missed	missed	LS	missed	missed	LS	LS	missed	LS	missed	missed	missed	missed	0	4	LS
2573	Chr5	3980000	3990000	Core	missed	LS	missed	missed	LS	LS	LS	missed	missed	missed	missed	missed	missed	missed	missed	0	4	LS
2574	Chr5	3990000	4000000	Core	missed	missed	missed	missed	missed	missed	missed	LS	LS	missed	missed	missed	missed	missed	missed	0	2	LS
2591	Chr5	4160000	4170000	Core	LS	missed	missed	missed	LS	missed	LS	missed	missed	missed	missed	missed	missed	missed	missed	0	3	LS
2593	Chr6	0	10000	Core	LS	missed	missed	missed	missed	LS	missed	missed	missed	missed	LS	LS	missed	LS	missed	0	5	LS
2594	Chr6	10000	20000	Core	missed	missed	missed	missed	LS	missed	missed	missed	missed	LS	missed	missed	missed	missed	LS	0	3	LS
2610	Chr6	170000	180000	Core	missed	missed	missed	missed	missed	missed	missed	missed	LS	missed	missed	missed	missed	missed	LS	0	2	LS
2649	Chr6	560000	570000	Core	missed	missed	missed	Core	missed	missed	missed	missed	missed	missed	LS	missed	missed	missed	LS	1	2	LS
2651	Chr6	580000	590000	Core	LS	missed	missed	missed	missed	missed	missed	missed	missed	missed	missed	missed	missed	missed	missed	0	1	LS
2653	Chr6	600000	610000	Core	LS	missed	missed	missed	missed	missed	missed	missed	missed	missed	missed	missed	missed	missed	LS	0	2	LS
2657	Chr6	640000	650000	Core	missed	missed	LS	LS	missed	Core	LS	LS	missed	missed	LS	missed	missed	missed	missed	1	5	LS
2661	Chr6	680000	690000	Core	missed	missed	missed	LS	missed	LS	missed	missed	missed	missed	missed	missed	missed	missed	missed	0	2	LS
2678	Chr6	850000	860000	Core	LS	LS	missed	missed	missed	LS	missed	missed	missed	missed	missed	missed	LS	LS	missed	0	5	LS
2679	Chr6	860000	870000	Core	missed	missed	missed	missed	LS	missed	missed	missed	missed	missed	missed	missed	missed	missed	missed	0	1	LS
2709	Chr6	1160000	1170000	Core	missed	missed	missed	LS	missed	LS	missed	LS	missed	missed	missed	missed	missed	missed	missed	0	3	LS
2718	Chr6	1250000	1260000	Core	missed	missed	missed	missed	missed	missed	missed	missed	missed	missed	missed	missed	missed	LS	missed	0	1	LS
2740	Chr6	1470000	1480000	Core	LS	missed	LS	missed	missed	missed	LS	missed	missed	missed	missed	missed	missed	missed	missed	0	3	LS
2743	Chr6	1500000	1510000	Core	missed	missed	LS	missed	missed	missed	missed	LS	LS	missed	missed	missed	missed	missed	missed	0	3	LS
2745	Chr6	1520000	1530000	Core	LS	missed	missed	missed	missed	missed	missed	missed	missed	missed	missed	missed	missed	missed	missed	0	1	LS
2776	Chr6	1830000	1840000	Core	missed	missed	LS	missed	missed	missed	missed	missed	missed	missed	missed	missed	missed	LS	missed	0	2	LS
2782	Chr6	1890000	1900000	Core	missed	LS	missed	missed	missed	missed	LS	missed	missed	missed	missed	missed	Core	missed	missed	1	2	LS
2895	Chr6	3020000	3030000	Core	missed	missed	missed	missed	LS	missed	missed	missed	missed	LS	LS	missed	missed	missed	missed	0	3	LS
2899	Chr6	3060000	3070000	Core	missed	missed	LS	missed	missed	missed	missed	missed	missed	missed	missed	missed	LS	missed	missed	0	2	LS
2901	Chr6	3080000	3090000	Core	missed	LS	missed	LS	missed	missed	missed	missed	missed	missed	missed	missed	missed	LS	missed	0	3	LS
2902	Chr6	3090000	3100000	Core	missed	missed	missed	missed	missed	missed	missed	missed	missed	missed	LS	missed	missed	LS	missed	0	2	LS
2904	Chr6	3110000	3120000	Core	missed	missed	missed	LS	missed	missed	missed	LS	missed	missed	missed	missed	missed	missed	missed	0	2	LS
2908	Chr6	3150000	3160000	Core	missed	missed	missed	missed	missed	missed	LS	missed	missed	missed	missed	missed	missed	missed	missed	0	1	LS
2909	Chr6	3160000	3170000	Core	missed	missed	missed	missed	LS	missed	missed	missed	missed	missed	missed	missed	missed	missed	LS	0	2	LS
2910	Chr6	3170000	3180000	Core	missed	missed	missed	missed	missed	missed	LS	missed	missed	missed	missed	missed	missed	LS	missed	0	2	LS
2911	Chr6	3180000	3190000	Core	LS	missed	missed	missed	missed	missed	missed	missed	missed	missed	missed	missed	LS	LS	missed	0	3	LS
2912	Chr6	3190000	3200000	Core	LS	LS	missed	missed	missed	missed	missed	missed	missed	missed	missed	missed	LS	missed	missed	0	3	LS
2914	Chr6	3210000	3220000	Core	missed	missed	LS	missed	missed	missed	missed	LS	missed	missed	missed	missed	missed	missed	LS	0	3	LS
2915	Chr6	3220000	3230000	Core	LS	LS	missed	missed	missed	missed	missed	missed	missed	missed	missed	LS	missed	missed	missed	0	3	LS
2930	Chr6	3370000	3380000	Core	missed	missed	missed	missed	missed	missed	LS	missed	missed	missed	missed	missed	LS	missed	missed	0	2	LS
2931	Chr6	3380000	3390000	Core	missed	missed	LS	missed	missed	missed	missed	missed	missed	missed	missed	LS	missed	missed	missed	0	2	LS
2945	Chr6	3520000	3530000	Core	missed	missed	missed	LS	LS	missed	LS	missed	missed	missed	missed	LS	missed	missed	missed	0	4	LS
2948	Chr7	10000	20000	Core	missed	LS	LS	missed	LS	missed	LS	missed	LS	missed	missed	LS	missed	missed	missed	0	6	LS
2951	Chr7	40000	50000	Core	missed	missed	missed	missed	LS	missed	LS	missed	missed	missed	LS	missed	missed	missed	missed	0	3	LS
3253	Chr7	3060000	3070000	Core	missed	Core	LS	missed	missed	missed	missed	missed	LS	missed	missed	LS	missed	missed	missed	1	3	LS
3255	Chr7	3080000	3090000	Core	missed	missed	missed	LS	missed	missed	LS	LS	missed	LS	missed	missed	missed	missed	LS	0	5	LS
3268	Chr7	3210000	3220000	Core	LS	missed	missed	missed	missed	LS	missed	missed	missed	missed	missed	missed	LS	missed	LS	0	4	LS
3275	Chr8	0	10000	Core	missed	missed	missed	LS	missed	missed	missed	missed	missed	missed	missed	LS	missed	LS	missed	0	3	LS
3276	Chr8	10000	20000	Core	missed	missed	LS	LS	missed	missed	LS	LS	missed	LS	LS	missed	LS	missed	missed	0	7	LS
3277	Chr8	20000	30000	Core	LS	missed	missed	missed	missed	missed	missed	missed	LS	missed	missed	LS	missed	missed	missed	0	3	LS
3278	Chr8	30000	40000	Core	missed	missed	missed	missed	missed	missed	missed	missed	LS	missed	LS	missed	missed	missed	missed	0	2	LS
3293	Chr8	180000	190000	Core	LS	missed	missed	LS	missed	missed	missed	missed	Core	LS	Core	missed	LS	Core	missed	3	4	LS
3300	Chr8	250000	260000	Core	missed	missed	missed	LS	missed	missed	missed	LS	missed	LS	missed	missed	missed	missed	missed	0	3	LS
3307	Chr8	320000	330000	Core	missed	missed	missed	missed	missed	missed	missed	LS	LS	missed	missed	missed	missed	missed	missed	0	2	LS
3316	Chr8	410000	420000	Core	LS	missed	LS	missed	missed	missed	missed	LS	LS	missed	LS	LS	missed	missed	missed	0	6	LS
3317	Chr8	420000	430000	Core	missed	missed	missed	missed	missed	missed	missed	missed	missed	missed	LS	missed	LS	missed	LS	0	3	LS
3318	Chr8	430000	440000	Core	missed	LS	LS	missed	missed	missed	missed	missed	missed	missed	LS	LS	missed	missed	missed	0	4	LS
3326	Chr8	510000	520000	Core	missed	LS	missed	missed	missed	missed	missed	missed	LS	LS	missed	missed	missed	missed	missed	0	3	LS
3327	Chr8	520000	530000	Core	missed	missed	missed	missed	LS	missed	missed	missed	missed	missed	LS	missed	LS	LS	LS	0	5	LS
3330	Chr8	550000	560000	Core	LS	missed	Core	missed	missed	missed	missed	missed	LS	missed	missed	missed	missed	missed	missed	1	2	LS
3338	Chr8	630000	640000	Core	missed	missed	missed	LS	missed	missed	missed	missed	missed	LS	missed	missed	missed	missed	missed	0	2	LS
3343	Chr8	680000	690000	Core	missed	missed	missed	missed	missed	Core	missed	LS	missed	LS	missed	missed	missed	missed	missed	1	2	LS
3351	Chr8	760000	770000	Core	missed	LS	missed	missed	missed	missed	missed	missed	missed	missed	missed	missed	LS	missed	missed	0	2	LS
3352	Chr8	770000	780000	Core	missed	missed	missed	missed	LS	LS	LS	missed	missed	missed	missed	missed	missed	LS	missed	0	4	LS
3355	Chr8	800000	810000	Core	missed	LS	missed	LS	missed	missed	missed	missed	missed	missed	missed	missed	missed	missed	missed	0	2	LS
3363	Chr8	880000	890000	Core	missed	missed	missed	missed	missed	missed	missed	LS	missed	missed	missed	missed	LS	LS	missed	0	3	LS
3368	Chr8	930000	940000	Core	missed	missed	missed	LS	LS	missed	missed	missed	LS	missed	LS	missed	missed	missed	missed	0	4	LS
3403	Chr8	1280000	1290000	Core	missed	missed	missed	missed	missed	missed	LS	LS	missed	missed	LS	missed	missed	missed	missed	0	3	LS
3456	Chr8	1810000	1820000	Core	missed	LS	missed	missed	missed	missed	missed	missed	missed	missed	missed	missed	missed	LS	missed	0	2	LS
3542	Chr8	2670000	2680000	Core	missed	missed	missed	missed	missed	missed	missed	missed	missed	missed	missed	missed	missed	LS	missed	0	1	LS
3544	Chr8	2690000	2700000	Core	missed	LS	missed	missed	missed	missed	missed	missed	missed	missed	missed	missed	missed	missed	missed	0	1	LS
3545	Chr8	2700000	2710000	Core	missed	missed	missed	missed	missed	missed	missed	missed	LS	missed	missed	missed	missed	missed	missed	0	1	LS
3546	Chr8	2710000	2720000	Core	missed	LS	missed	missed	missed	missed	missed	LS	missed	missed	missed	missed	missed	missed	missed	0	2	LS
3550	Chr8	2750000	2760000	Core	missed	missed	missed	missed	missed	missed	missed	LS	missed	missed	missed	missed	LS	missed	missed	0	2	LS
3551	Chr8	2760000	2770000	Core	missed	missed	missed	LS	LS	missed	missed	missed	missed	missed	missed	missed	missed	missed	missed	0	2	LS
3555	Chr8	2800000	2810000	Core	missed	missed	missed	LS	missed	missed	missed	missed	missed	LS	missed	missed	missed	missed	missed	0	2	LS
3558	Chr8	2830000	2840000	Core	missed	missed	LS	missed	missed	missed	LS	missed	LS	LS	missed	missed	LS	missed	missed	0	5	LS
3559	Chr8	2840000	2850000	Core	missed	missed	missed	missed	missed	missed	missed	missed	missed	missed	missed	missed	LS	missed	missed	0	1	LS
3560	Chr8	2850000	2860000	Core	missed	LS	missed	missed	LS	missed	missed	missed	missed	missed	missed	missed	missed	missed	missed	0	2	LS
3568	Chr8	2930000	2940000	Core	missed	LS	missed	missed	missed	missed	missed	missed	missed	missed	missed	missed	missed	LS	missed	0	2	LS
3569	Chr8	2940000	2950000	Core	LS	LS	LS	LS	missed	missed	missed	missed	LS	missed	missed	missed	missed	missed	missed	0	5	LS
3595	Chr8	3200000	3210000	Core	missed	missed	missed	missed	missed	LS	LS	missed	missed	missed	missed	LS	missed	LS	missed	0	4	LS
3606	Chr8	3310000	3320000	Core	missed	LS	missed	missed	missed	Core	missed	missed	LS	missed	missed	LS	missed	LS	missed	1	4	LS
3608	Chr8	3330000	3340000	Core	LS	missed	missed	missed	missed	missed	LS	missed	LS	missed	missed	missed	missed	missed	missed	0	3	LS
3609	Chr8	3340000	3350000	Core	missed	missed	missed	missed	missed	missed	missed	missed	missed	LS	missed	missed	missed	missed	missed	0	1	LS
Missed, regions that were not included in the 20% testing for that round of prediction; CoreCount, row sum of the number of core predictions for that region across the 15 trials; LScount, row sum fo the number of LS predictions for that region across the 15 trials; Final Pred, the consensus designation of a region was determined by the greater of the counts of Core or LS predictions across the 15…

[truncated: 8 more sheets: table11_ChiSq_inplanta, table12_ChiSq_effector, table13_ChiSq_sigP, table14_Chisq_TEs.UMAP, table15_Kwtest_TE.UMAP, table16_Chisq_Genes.UMAP, table17_Kwtest_gene.UMAP, table18_StrainList]
